# Supplementary material for: TREX tetramer disruption alters RNA processing necessary for corticogenesis in THOC6 Intellectual Disability Syndrome
Source: Nat Commun. 2024 Feb 22;15:1640. doi: 10.1038/s41467-024-45948-y (PMC10884030; doi:10.1038/s41467-024-45948-y)
Supplement: Supplementary file 3 — Supplementary Data 1 [file 41467_2024_45948_MOESM3_ESM.xlsx]

## Sheet: RSEM
E9.5 mouse forebrain													hNPCs																		E9.5 mouse forebrain										hNPCs
gene_id	entrezgene_id	external_gene_name	description	WT_1	WT_2	WT_3	HET_1	HET_2	HET_3	KO_1	KO_2	KO_3	gene_id	entrezgene_id	external_gene_name	description	H9_WT_1	H9_WT_2	AS0041_WT_1	AS0041_WT_2	AS0035_WT_1	AS0035_WT_2	E188K-HET_1	E188K-HET_2	W100-HET_1	W100-HET_2	E188K-AFF_1	E188K-AFF_2	W100-AFF_1	W100-AFF_2	ERCC ID	WT_1	WT_2	WT_3	HET_1	HET_2	HET_3	KO_1	KO_2	KO_3	ERCC ID	H9_WT_1	H9_WT_2	AS0041_WT_1	AS0041_WT_2	AS0035_WT_1	AS0035_WT_2	E188K-HET_1	E188K-HET_2
ENSMUSG00000000001	14679	Gnai3	guanine nucleotide binding protein (G protein), alpha inhibiting 3 [Source:MGI Symbol;Acc:MGI:95773]	2222	2004	2873	2102	2479	2885	2382	2586	3109	ENSG00000000003	7105	TSPAN6	tetraspanin 6 [Source:HGNC Symbol;Acc:HGNC:11858]	309	365	259	375	403	443	394	430	410	387	370	403	373	434	ERCC-00171	1910	1654	3087	2009	1836	3106	2247	2229	2349	ERCC-00171	369	414	387	639	423	473	364	516
ENSMUSG00000000003	54192	Pbsn	probasin [Source:MGI Symbol;Acc:MGI:1860484]	0	0	0	0	0	0	0	0	0	ENSG00000000005	64102	TNMD	tenomodulin [Source:HGNC Symbol;Acc:HGNC:17757]	4	0	50	95	0	0	25	23	16	14	1	0	15	22	ERCC-00170	12	10	30	12	19	27	9	25	10	ERCC-00170	2	1	0	3	0	4	2	1
ENSMUSG00000000028	12544	Cdc45	cell division cycle 45 [Source:MGI Symbol;Acc:MGI:1338073]	387	395	494	388	406	572	466	430	549	ENSG00000000419	8813	DPM1	dolichyl-phosphate mannosyltransferase subunit 1, catalytic [Source:HGNC Symbol;Acc:HGNC:3005]	76	73	44	65	65	74	78	106	69	71	55	72	55	70	ERCC-00168	0	0	0	0	2	3	1	0	1	ERCC-00168	0	0	0	0	0	0	0	1
ENSMUSG00000000031	.	H19	H19, imprinted maternally expressed transcript [Source:MGI Symbol;Acc:MGI:95891]	7804	6203	8747	5941	7166	9006	12035	10507	12089	ENSG00000000457	57147	SCYL3	SCY1 like pseudokinase 3 [Source:HGNC Symbol;Acc:HGNC:19285]	61	84	53	77	97	80	72	103	71	85	54	79	102	104	ERCC-00165	46	30	36	33	43	47	50	33	24	ERCC-00165	10	8	12	17	11	13	18	14
ENSMUSG00000000037	107815	Scml2	Scm polycomb group protein like 2 [Source:MGI Symbol;Acc:MGI:1340042]	91	103	116	73	105	89	93	101	105	ENSG00000000460	55732	C1orf112	chromosome 1 open reading frame 112 [Source:HGNC Symbol;Acc:HGNC:25565]	195	221	43	69	240	267	235	309	143	156	126	144	128	160	ERCC-00164	0	1	1	0	1	0	0	3	0	ERCC-00164	0	1	1	0	0	3	1	0
ENSMUSG00000000049	11818	Apoh	apolipoprotein H [Source:MGI Symbol;Acc:MGI:88058]	0	0	0	0	0	0	0	0	0	ENSG00000000938	2268	FGR	FGR proto-oncogene, Src family tyrosine kinase [Source:HGNC Symbol;Acc:HGNC:3697]	1	1	0	0	0	0	2	0	1	2	1	1	1	1	ERCC-00163	2	8	10	3	14	8	11	8	8	ERCC-00163	1	0	0	1	1	2	1	2
ENSMUSG00000000056	67608	Narf	nuclear prelamin A recognition factor [Source:MGI Symbol;Acc:MGI:1914858]	680	618	819	558	634	831	1116	903	906	ENSG00000000971	3075	CFH	complement factor H [Source:HGNC Symbol;Acc:HGNC:4883]	10	11	66	111	1	1	27	22	58	56	12	15	0	1	ERCC-00162	20	21	25	30	14	28	12	10	13	ERCC-00162	10	16	13	17	12	21	9	21
ENSMUSG00000000058	12390	Cav2	caveolin 2 [Source:MGI Symbol;Acc:MGI:107571]	37	23	19	9	17	25	30	25	28	ENSG00000001036	2519	FUCA2	alpha-L-fucosidase 2 [Source:HGNC Symbol;Acc:HGNC:4008]	147	184	184	297	108	153	108	110	173	155	85	123	142	166	ERCC-00160	14	17	17	19	18	17	14	13	19	ERCC-00160	4	1	4	4	9	3	4	10
ENSMUSG00000000078	23849	Klf6	Kruppel-like factor 6 [Source:MGI Symbol;Acc:MGI:1346318]	242	266	364	247	287	298	578	465	533	ENSG00000001084	2729	GCLC	glutamate-cysteine ligase catalytic subunit [Source:HGNC Symbol;Acc:HGNC:4311]	120	154	95	128	134	170	135	202	131	126	101	101	102	148	ERCC-00158	0	3	0	1	0	0	0	1	1	ERCC-00158	1	0	1	0	0	0	0	0
ENSMUSG00000000085	29871	Scmh1	sex comb on midleg homolog 1 [Source:MGI Symbol;Acc:MGI:1352762]	294	271	370	260	327	400	355	309	317	ENSG00000001167	4800	NFYA	nuclear transcription factor Y subunit alpha [Source:HGNC Symbol;Acc:HGNC:7804]	304	372	237	353	357	322	369	480	316	313	243	246	249	259	ERCC-00157	19	15	27	15	11	30	24	24	20	ERCC-00157	0	5	2	2	4	3	1	1
ENSMUSG00000000088	12858	Cox5a	cytochrome c oxidase subunit 5A [Source:MGI Symbol;Acc:MGI:88474]	366	386	608	427	401	603	392	438	559	ENSG00000001460	90529	STPG1	sperm tail PG-rich repeat containing 1 [Source:HGNC Symbol;Acc:HGNC:28070]	28	33	25	26	4	3	51	56	30	37	20	40	101	142	ERCC-00156	0	0	0	0	0	0	0	0	0	ERCC-00156	0	0	1	0	0	0	0	0
ENSMUSG00000000093	21385	Tbx2	T-box 2 [Source:MGI Symbol;Acc:MGI:98494]	750	710	572	479	510	866	740	623	635	ENSG00000001461	57185	NIPAL3	NIPA like domain containing 3 [Source:HGNC Symbol;Acc:HGNC:25233]	22	20	69	105	1	3	35	45	51	48	34	27	102	119	ERCC-00154	1	3	9	0	4	3	3	1	0	ERCC-00154	2	1	0	1	0	1	0	1
ENSMUSG00000000094	21387	Tbx4	T-box 4 [Source:MGI Symbol;Acc:MGI:102556]	8	7	5	1	4	3	2	1	2	ENSG00000001497	81887	LAS1L	LAS1 like, ribosome biogenesis factor [Source:HGNC Symbol;Acc:HGNC:25726]	166	183	82	132	197	223	211	258	203	193	180	152	160	153	ERCC-00150	0	1	5	2	0	2	0	1	3	ERCC-00150	0	1	0	1	1	0	1	0
ENSMUSG00000000103	22768	Zfy2	zinc finger protein 2, Y-linked [Source:MGI Symbol;Acc:MGI:99213]	0	0	0	0	0	0	0	0	0	ENSG00000001561	22875	ENPP4	ectonucleotide pyrophosphatase/phosphodiesterase 4 [Source:HGNC Symbol;Acc:HGNC:3359]	9	10	15	32	25	20	39	36	37	33	17	24	69	59	ERCC-00148	0	3	1	3	2	3	4	1	1	ERCC-00148	0	0	0	0	0	0	0	0
ENSMUSG00000000120	18053	Ngfr	nerve growth factor receptor (TNFR superfamily, member 16) [Source:MGI Symbol;Acc:MGI:97323]	187	173	229	137	187	263	358	222	304	ENSG00000001617	6405	SEMA3F	semaphorin 3F [Source:HGNC Symbol;Acc:HGNC:10728]	7	3	595	896	4	2	179	230	36	31	30	24	53	84	ERCC-00147	0	2	0	1	1	1	0	1	0	ERCC-00147	0	0	0	0	0	0	1	0
ENSMUSG00000000125	22415	Wnt3	wingless-type MMTV integration site family, member 3 [Source:MGI Symbol;Acc:MGI:98955]	1	6	5	2	9	9	7	7	15	ENSG00000001626	1080	CFTR	CF transmembrane conductance regulator [Source:HGNC Symbol;Acc:HGNC:1884]	1	1	0	1	1	0	4	3	4	0	2	4	3	3	ERCC-00145	596	537	1158	656	660	1095	791	793	745	ERCC-00145	93	105	104	204	97	144	117	121
ENSMUSG00000000126	216795	Wnt9a	wingless-type MMTV integration site family, member 9A [Source:MGI Symbol;Acc:MGI:2446084]	42	36	53	25	41	37	70	46	60	ENSG00000001629	54467	ANKIB1	ankyrin repeat and IBR domain containing 1 [Source:HGNC Symbol;Acc:HGNC:22215]	424	509	542	882	420	482	499	697	517	450	372	373	462	493	ERCC-00144	11	8	10	14	3	15	14	17	8	ERCC-00144	0	1	7	1	0	3	0	1
ENSMUSG00000000127	14158	Fer	fer (fms/fps related) protein kinase [Source:MGI Symbol;Acc:MGI:105917]	297	272	303	233	277	298	404	453	442	ENSG00000001630	1595	CYP51A1	cytochrome P450 family 51 subfamily A member 1 [Source:HGNC Symbol;Acc:HGNC:2649]	660	815	658	968	510	587	647	868	497	547	392	470	289	319	ERCC-00143	16	13	28	22	17	21	15	25	10	ERCC-00143	3	1	2	11	1	8	3	5
ENSMUSG00000000131	74204	Xpo6	exportin 6 [Source:MGI Symbol;Acc:MGI:2429950]	2519	2199	3037	2320	2532	2977	2646	3063	3393	ENSG00000001631	889	KRIT1	KRIT1 ankyrin repeat containing [Source:HGNC Symbol;Acc:HGNC:1573]	304	244	166	286	284	318	267	402	344	279	268	339	252	322	ERCC-00142	0	0	0	0	0	0	0	0	0	ERCC-00142	0	0	0	0	0	0	0	0
ENSMUSG00000000134	209446	Tfe3	transcription factor E3 [Source:MGI Symbol;Acc:MGI:98511]	469	372	551	384	476	551	504	569	653	ENSG00000002016	5893	RAD52	RAD52 homolog, DNA repair protein [Source:HGNC Symbol;Acc:HGNC:9824]	72	73	60	74	68	85	63	126	118	108	89	124	105	130	ERCC-00138	0	0	0	0	0	0	1	0	0	ERCC-00138	0	0	0	1	0	0	0	0
ENSMUSG00000000142	12006	Axin2	axin 2 [Source:MGI Symbol;Acc:MGI:1270862]	1132	1047	1371	961	1394	1274	1267	1290	1555	ENSG00000002079	.	MYH16	myosin heavy chain 16 pseudogene [Source:HGNC Symbol;Acc:HGNC:31038]	0	2	0	0	1	3	0	1	1	2	2	1	3	1	ERCC-00137	0	0	0	0	0	0	0	0	0	ERCC-00137	0	0	0	0	0	0	0	0
ENSMUSG00000000148	231841	Brat1	BRCA1-associated ATM activator 1 [Source:MGI Symbol;Acc:MGI:1891679]	160	194	238	198	201	234	242	244	253	ENSG00000002330	572	BAD	BCL2 associated agonist of cell death [Source:HGNC Symbol;Acc:HGNC:936]	33	39	40	43	42	52	42	37	47	39	21	26	21	24	ERCC-00136	1851	1573	3266	1982	1912	3296	2394	2378	2316	ERCC-00136	253	309	310	483	312	420	340	400
ENSMUSG00000000149	14673	Gna12	guanine nucleotide binding protein, alpha 12 [Source:MGI Symbol;Acc:MGI:95767]	1110	892	1308	900	1071	1320	854	1058	1319	ENSG00000002549	51056	LAP3	leucine aminopeptidase 3 [Source:HGNC Symbol;Acc:HGNC:18449]	164	163	148	212	177	203	147	207	103	79	86	81	76	88	ERCC-00134	1	0	0	0	0	0	0	0	0	ERCC-00134	0	0	0	0	0	0	0	0
ENSMUSG00000000154	18400	Slc22a18	solute carrier family 22 (organic cation transporter), member 18 [Source:MGI Symbol;Acc:MGI:1336884]	0	0	3	1	1	3	3	0	6	ENSG00000002586	4267	CD99	CD99 molecule (Xg blood group) [Source:HGNC Symbol;Acc:HGNC:7082]	493	518	787	1342	567	642	574	754	431	511	472	601	350	427	ERCC-00131	86	77	168	114	103	139	105	123	116	ERCC-00131	20	20	25	46	32	34	24	40
ENSMUSG00000000157	16415	Itgb2l	integrin beta 2-like [Source:MGI Symbol;Acc:MGI:1277979]	0	0	0	0	0	0	0	0	0	ENSG00000002587	9957	HS3ST1	heparan sulfate-glucosamine 3-sulfotransferase 1 [Source:HGNC Symbol;Acc:HGNC:5194]	17	17	2	4	1	3	20	20	15	17	9	9	48	53	ERCC-00130	22600	20246	38377	24434	23824	38738	28705	28526	27524	ERCC-00130	3863	4428	4720	7170	4363	5825	4661	6514
ENSMUSG00000000159	72058	Igsf5	immunoglobulin superfamily, member 5 [Source:MGI Symbol;Acc:MGI:1919308]	0	0	0	0	0	0	0	0	0	ENSG00000002726	26	AOC1	amine oxidase copper containing 1 [Source:HGNC Symbol;Acc:HGNC:80]	0	0	0	0	0	0	1	0	3	0	1	2	1	0	ERCC-00126	4	8	6	6	1	7	8	4	3	ERCC-00126	0	0	1	2	2	2	3	2
ENSMUSG00000000167	72614	Pih1d2	PIH1 domain containing 2 [Source:MGI Symbol;Acc:MGI:1919864]	24	15	21	18	27	23	26	16	24	ENSG00000002745	51384	WNT16	Wnt family member 16 [Source:HGNC Symbol;Acc:HGNC:16267]	4	1	2	0	0	3	9	10	6	4	4	3	5	2	ERCC-00123	0	3	1	0	0	4	0	0	0	ERCC-00123	0	0	0	0	1	0	0	1
ENSMUSG00000000168	235339	Dlat	dihydrolipoamide S-acetyltransferase (E2 component of pyruvate dehydrogenase complex) [Source:MGI Symbol;Acc:MGI:2385311]	724	606	946	691	889	990	832	862	1023	ENSG00000002746	23072	HECW1	HECT, C2 and WW domain containing E3 ubiquitin protein ligase 1 [Source:HGNC Symbol;Acc:HGNC:22195]	18	21	35	66	2	1	54	52	78	63	21	12	15	24	ERCC-00120	0	0	2	0	0	0	2	0	0	ERCC-00120	0	1	0	0	0	0	0	0
ENSMUSG00000000171	66925	Sdhd	succinate dehydrogenase complex, subunit D, integral membrane protein [Source:MGI Symbol;Acc:MGI:1914175]	709	634	924	703	732	943	589	760	935	ENSG00000002822	8379	MAD1L1	mitotic arrest deficient 1 like 1 [Source:HGNC Symbol;Acc:HGNC:6762]	70	88	38	92	85	102	91	124	78	79	84	91	98	86	ERCC-00117	0	0	0	0	0	0	0	0	0	ERCC-00117	0	0	0	0	0	0	0	0
ENSMUSG00000000182	64654	Fgf23	fibroblast growth factor 23 [Source:MGI Symbol;Acc:MGI:1891427]	0	3	7	1	2	0	64	15	13	ENSG00000002834	3927	LASP1	LIM and SH3 protein 1 [Source:HGNC Symbol;Acc:HGNC:6513]	1803	2187	3423	5639	997	1079	1183	1540	2082	2022	916	988	885	1005	ERCC-00116	656	628	1148	726	747	1253	845	878	921	ERCC-00116	181	227	247	372	283	312	233	372
ENSMUSG00000000183	14177	Fgf6	fibroblast growth factor 6 [Source:MGI Symbol;Acc:MGI:95520]	0	1	4	0	0	0	1	3	0	ENSG00000002919	29916	SNX11	sorting nexin 11 [Source:HGNC Symbol;Acc:HGNC:14975]	68	87	42	79	71	65	75	93	73	73	70	47	66	67	ERCC-00113	2280	1950	3602	2374	2200	3655	2627	2672	2637	ERCC-00113	341	373	429	645	416	567	399	498
ENSMUSG00000000184	12444	Ccnd2	cyclin D2 [Source:MGI Symbol;Acc:MGI:88314]	9401	8494	11642	8736	10058	13161	10451	12410	13033	ENSG00000002933	55365	TMEM176A	transmembrane protein 176A [Source:HGNC Symbol;Acc:HGNC:24930]	1	0	14	21	1	1	7	18	6	5	1	2	4	14	ERCC-00112	127	126	249	137	134	196	149	164	154	ERCC-00112	31	34	63	84	54	52	58	49
ENSMUSG00000000194	277463	Gpr107	G protein-coupled receptor 107 [Source:MGI Symbol;Acc:MGI:2139054]	566	467	605	463	579	598	643	662	683	ENSG00000003056	4074	M6PR	mannose-6-phosphate receptor, cation dependent [Source:HGNC Symbol;Acc:HGNC:6752]	375	434	293	475	437	439	417	530	381	336	323	414	295	345	ERCC-00111	675	608	1062	700	656	1132	811	868	800	ERCC-00111	181	190	187	326	191	253	197	307
ENSMUSG00000000197	338370	Nalcn	sodium leak channel, non-selective [Source:MGI Symbol;Acc:MGI:2444306]	58	52	42	42	50	46	55	49	64	ENSG00000003096	90293	KLHL13	kelch like family member 13 [Source:HGNC Symbol;Acc:HGNC:22931]	60	91	33	47	178	200	160	216	102	96	102	113	110	111	ERCC-00109	1	0	0	0	1	2	0	1	0	ERCC-00109	0	0	0	0	0	0	0	0
ENSMUSG00000000202	72014	Btbd17	BTB (POZ) domain containing 17 [Source:MGI Symbol;Acc:MGI:1919264]	56	60	103	46	84	86	72	52	64	ENSG00000003137	56603	CYP26B1	cytochrome P450 family 26 subfamily B member 1 [Source:HGNC Symbol;Acc:HGNC:20581]	4	2	65	109	2	2	17	22	24	19	52	54	6	7	ERCC-00108	428	387	684	480	433	791	518	607	508	ERCC-00108	140	161	170	283	185	231	184	263
ENSMUSG00000000204	20558	Slfn4	schlafen 4 [Source:MGI Symbol;Acc:MGI:1329010]	1	2	0	0	0	0	0	0	0	ENSG00000003147	3382	ICA1	islet cell autoantigen 1 [Source:HGNC Symbol;Acc:HGNC:5343]	3	4	2	1	14	16	7	6	19	20	14	16	45	47	ERCC-00104	1	0	1	0	0	0	2	0	0	ERCC-00104	0	0	0	0	0	0	0	0
ENSMUSG00000000214	21823	Th	tyrosine hydroxylase [Source:MGI Symbol;Acc:MGI:98735]	0	3	0	0	0	2	1	0	0	ENSG00000003249	79007	DBNDD1	dysbindin domain containing 1 [Source:HGNC Symbol;Acc:HGNC:28455]	30	41	6	12	10	8	92	144	62	56	88	82	101	122	ERCC-00099	25	11	33	24	24	27	29	33	26	ERCC-00099	9	3	5	6	5	5	4	4
ENSMUSG00000000215	16334	Ins2	insulin II [Source:MGI Symbol;Acc:MGI:96573]	0	0	0	0	0	0	0	0	0	ENSG00000003393	57679	ALS2	alsin Rho guanine nucleotide exchange factor ALS2 [Source:HGNC Symbol;Acc:HGNC:443]	417	464	259	386	446	449	404	550	456	482	293	366	425	440	ERCC-00098	0	0	0	0	0	0	1	1	0	ERCC-00098	0	0	0	0	0	0	0	0
ENSMUSG00000000216	20278	Scnn1g	sodium channel, nonvoltage-gated 1 gamma [Source:MGI Symbol;Acc:MGI:104695]	0	1	0	0	0	0	0	1	0	ENSG00000003400	843	CASP10	caspase 10 [Source:HGNC Symbol;Acc:HGNC:1500]	3	2	4	15	2	1	5	0	8	4	3	3	2	4	ERCC-00097	0	0	2	0	0	0	1	0	0	ERCC-00097	0	0	0	0	0	0	0	0
ENSMUSG00000000223	13497	Drp2	dystrophin related protein 2 [Source:MGI Symbol;Acc:MGI:107432]	38	40	37	24	26	31	55	48	31	ENSG00000003402	8837	CFLAR	CASP8 and FADD like apoptosis regulator [Source:HGNC Symbol;Acc:HGNC:1876]	14	11	156	210	403	392	100	158	196	155	149	156	359	435	ERCC-00096	14928	13677	25063	16403	15525	25456	19091	19216	18392	ERCC-00096	4327	4904	5489	8705	5509	6898	5423	8164
ENSMUSG00000000244	27027	Tspan32	tetraspanin 32 [Source:MGI Symbol;Acc:MGI:1350360]	15	11	18	25	10	23	22	21	16	ENSG00000003436	7035	TFPI	tissue factor pathway inhibitor [Source:HGNC Symbol;Acc:HGNC:11760]	298	361	2000	3047	164	158	198	248	548	547	118	155	149	200	ERCC-00095	47	43	62	64	42	70	78	58	70	ERCC-00095	19	30	30	39	23	35	38	46
ENSMUSG00000000247	16870	Lhx2	LIM homeobox protein 2 [Source:MGI Symbol;Acc:MGI:96785]	2707	2095	3047	2356	2373	2918	1588	2208	2043	ENSG00000003509	55471	NDUFAF7	NADH:ubiquinone oxidoreductase complex assembly factor 7 [Source:HGNC Symbol;Acc:HGNC:28816]	45	59	39	55	71	66	63	82	50	49	47	53	69	91	ERCC-00092	325	355	620	414	340	631	410	393	485	ERCC-00092	74	72	65	139	98	123	65	94
ENSMUSG00000000248	70809	Clec2g	C-type lectin domain family 2, member g [Source:MGI Symbol;Acc:MGI:1918059]	0	0	0	2	2	0	0	5	0	ENSG00000003756	10181	RBM5	RNA binding motif protein 5 [Source:HGNC Symbol;Acc:HGNC:9902]	844	956	657	1066	878	983	914	1266	942	873	801	837	967	1096	ERCC-00086	0	0	0	0	0	0	0	0	0	ERCC-00086	0	0	0	0	0	0	0	0
ENSMUSG00000000253	66355	Gmpr	guanosine monophosphate reductase [Source:MGI Symbol;Acc:MGI:1913605]	100	68	69	49	83	75	38	48	59	ENSG00000003987	9108	MTMR7	myotubularin related protein 7 [Source:HGNC Symbol;Acc:HGNC:7454]	57	57	48	46	56	59	70	118	99	97	57	83	83	83	ERCC-00085	5	4	2	9	6	4	5	2	1	ERCC-00085	5	4	2	3	1	3	1	3
ENSMUSG00000000263	14654	Glra1	glycine receptor, alpha 1 subunit [Source:MGI Symbol;Acc:MGI:95747]	0	2	2	0	3	0	0	0	1	ENSG00000003989	6542	SLC7A2	solute carrier family 7 member 2 [Source:HGNC Symbol;Acc:HGNC:11060]	68	76	5	23	208	173	157	204	41	38	70	55	59	82	ERCC-00084	34	19	42	27	34	60	38	27	41	ERCC-00084	9	9	13	11	6	10	16	8
ENSMUSG00000000266	23947	Mid2	midline 2 [Source:MGI Symbol;Acc:MGI:1344333]	75	66	87	56	109	104	89	85	128	ENSG00000004059	381	ARF5	ADP ribosylation factor 5 [Source:HGNC Symbol;Acc:HGNC:658]	294	321	233	355	332	380	305	417	316	294	230	269	224	225	ERCC-00083	0	0	0	0	0	1	0	0	0	ERCC-00083	0	0	0	0	0	0	0	0
ENSMUSG00000000275	217069	Trim25	tripartite motif-containing 25 [Source:MGI Symbol;Acc:MGI:102749]	90	90	127	94	112	109	117	149	112	ENSG00000004139	23098	SARM1	sterile alpha and TIR motif containing 1 [Source:HGNC Symbol;Acc:HGNC:17074]	379	489	149	183	744	769	447	656	462	413	511	508	227	280	ERCC-00081	0	0	0	0	0	0	0	1	0	ERCC-00081	0	0	0	0	0	0	0	0
ENSMUSG00000000276	56077	Dgke	diacylglycerol kinase, epsilon [Source:MGI Symbol;Acc:MGI:1889276]	159	149	201	163	157	153	132	149	177	ENSG00000004142	26073	POLDIP2	DNA polymerase delta interacting protein 2 [Source:HGNC Symbol;Acc:HGNC:23781]	382	487	317	516	473	456	392	609	381	340	289	323	284	285	ERCC-00079	35	41	61	43	32	78	69	60	38	ERCC-00079	5	9	9	16	13	10	5	6
ENSMUSG00000000278	74617	Scpep1	serine carboxypeptidase 1 [Source:MGI Symbol;Acc:MGI:1921867]	481	442	557	413	542	633	893	626	719	ENSG00000004399	23129	PLXND1	plexin D1 [Source:HGNC Symbol;Acc:HGNC:9107]	498	634	2198	3418	1157	1234	557	795	842	753	995	1108	799	880	ERCC-00078	53	36	76	39	46	72	50	45	53	ERCC-00078	5	6	5	13	9	12	5	12
ENSMUSG00000000282	17428	Mnt	max binding protein [Source:MGI Symbol;Acc:MGI:109150]	401	285	468	344	371	426	543	527	524	ENSG00000004455	204	AK2	adenylate kinase 2 [Source:HGNC Symbol;Acc:HGNC:362]	311	366	521	848	400	416	755	924	545	528	413	455	695	731	ERCC-00077	0	0	0	0	0	0	0	2	0	ERCC-00077	0	0	0	0	0	0	0	0
ENSMUSG00000000290	16414	Itgb2	integrin beta 2 [Source:MGI Symbol;Acc:MGI:96611]	3	5	8	0	5	13	6	6	6	ENSG00000004468	952	CD38	CD38 molecule [Source:HGNC Symbol;Acc:HGNC:1667]	8	7	31	61	2	3	1	0	29	33	9	1	7	5	ERCC-00076	83	72	155	102	84	188	103	139	129	ERCC-00076	24	26	34	27	28	46	18	25
ENSMUSG00000000295	69692	Hddc2	HD domain containing 2 [Source:MGI Symbol;Acc:MGI:1916942]	209	126	221	167	157	228	250	259	269	ENSG00000004478	2288	FKBP4	FKBP prolyl isomerase 4 [Source:HGNC Symbol;Acc:HGNC:3720]	372	422	263	430	463	521	605	760	321	320	250	274	315	370	ERCC-00075	0	0	0	0	0	0	1	0	0	ERCC-00075	0	0	0	0	0	0	0	0
ENSMUSG00000000296	21987	Tpd52l1	tumor protein D52-like 1 [Source:MGI Symbol;Acc:MGI:1298386]	53	39	64	31	60	61	77	44	69	ENSG00000004487	23028	KDM1A	lysine demethylase 1A [Source:HGNC Symbol;Acc:HGNC:29079]	547	611	419	601	871	988	990	1286	921	874	822	920	1450	1538	ERCC-00074	10109	8644	15783	10785	10088	17202	13261	13881	11914	ERCC-00074	2531	2824	2797	4076	2658	3453	2891	4276
ENSMUSG00000000301	18618	Pemt	phosphatidylethanolamine N-methyltransferase [Source:MGI Symbol;Acc:MGI:104535]	28	33	34	16	25	20	34	12	51	ENSG00000004534	10180	RBM6	RNA binding motif protein 6 [Source:HGNC Symbol;Acc:HGNC:9903]	262	352	229	368	359	404	317	388	325	298	274	336	268	293	ERCC-00073	0	0	1	0	0	0	0	0	0	ERCC-00073	1	0	0	1	0	1	0	1
ENSMUSG00000000303	12550	Cdh1	cadherin 1 [Source:MGI Symbol;Acc:MGI:88354]	420	345	707	599	624	669	670	689	829	ENSG00000004660	84254	CAMKK1	calcium/calmodulin dependent protein kinase kinase 1 [Source:HGNC Symbol;Acc:HGNC:1469]	4	12	26	31	27	20	41	56	29	30	20	29	27	35	ERCC-00071	31	25	59	45	30	75	39	32	52	ERCC-00071	2	5	2	10	6	5	5	12
ENSMUSG00000000305	12561	Cdh4	cadherin 4 [Source:MGI Symbol;Acc:MGI:99218]	374	320	391	255	309	373	308	316	324	ENSG00000004700	5965	RECQL	RecQ like helicase [Source:HGNC Symbol;Acc:HGNC:9948]	181	218	244	346	139	157	167	222	148	173	90	119	113	129	ERCC-00069	1	2	8	0	0	10	2	5	3	ERCC-00069	1	0	2	1	0	3	0	0
ENSMUSG00000000308	12716	Ckmt1	creatine kinase, mitochondrial 1, ubiquitous [Source:MGI Symbol;Acc:MGI:99441]	19	6	18	10	18	28	13	11	13	ENSG00000004766	55610	VPS50	VPS50 subunit of EARP/GARPII complex [Source:HGNC Symbol;Acc:HGNC:25956]	97	101	75	150	122	133	115	154	117	129	112	110	73	89	ERCC-00067	1	1	0	2	0	3	5	0	3	ERCC-00067	0	0	0	0	0	0	0	0
ENSMUSG00000000317	12029	Bcl6b	B cell CLL/lymphoma 6, member B [Source:MGI Symbol;Acc:MGI:1278332]	82	53	87	52	58	85	99	90	96	ENSG00000004776	126393	HSPB6	heat shock protein family B (small) member 6 [Source:HGNC Symbol;Acc:HGNC:26511]	2	1	183	282	2	3	3	6	5	10	0	3	1	2	ERCC-00062	53	47	79	51	72	92	68	77	54	ERCC-00062	14	18	18	22	11	24	11	26
ENSMUSG00000000318	17312	Clec10a	C-type lectin domain family 10, member A [Source:MGI Symbol;Acc:MGI:96975]	2	0	0	0	2	0	0	1	0	ENSG00000004777	115703	ARHGAP33	Rho GTPase activating protein 33 [Source:HGNC Symbol;Acc:HGNC:23085]	228	292	51	86	344	343	302	417	395	378	298	347	279	304	ERCC-00061	0	0	0	0	0	0	0	0	0	ERCC-00061	0	0	0	0	0	0	0	0
ENSMUSG00000000320	11684	Alox12	arachidonate 12-lipoxygenase [Source:MGI Symbol;Acc:MGI:87998]	22	18	11	20	8	17	35	17	35	ENSG00000004779	4706	NDUFAB1	NADH:ubiquinone oxidoreductase subunit AB1 [Source:HGNC Symbol;Acc:HGNC:7694]	79	92	51	78	54	71	85	87	51	79	51	53	68	90	ERCC-00060	63	65	152	78	50	123	114	123	74	ERCC-00060	14	25	18	24	22	29	22	15
ENSMUSG00000000325	11877	Arvcf	armadillo repeat gene deleted in velocardiofacial syndrome [Source:MGI Symbol;Acc:MGI:109620]	1058	943	1319	812	911	1152	997	981	1082	ENSG00000004799	5166	PDK4	pyruvate dehydrogenase kinase 4 [Source:HGNC Symbol;Acc:HGNC:8812]	7	4	7	2	19	21	12	14	17	18	21	19	22	20	ERCC-00059	2	6	5	11	2	5	5	2	5	ERCC-00059	1	3	1	1	1	1	2	2
ENSMUSG00000000326	12846	Comt	catechol-O-methyltransferase [Source:MGI Symbol;Acc:MGI:88470]	286	283	341	277	310	429	346	336	332	ENSG00000004809	85413	SLC22A16	solute carrier family 22 member 16 [Source:HGNC Symbol;Acc:HGNC:20302]	0	0	0	1	0	0	1	0	2	2	1	0	0	0	ERCC-00058	1	1	4	4	0	1	0	2	4	ERCC-00058	0	1	0	0	0	1	0	0
ENSMUSG00000000339	66368	Rtca	RNA 3'-terminal phosphate cyclase [Source:MGI Symbol;Acc:MGI:1913618]	548	498	741	509	596	738	561	602	635	ENSG00000004838	51364	ZMYND10	zinc finger MYND-type containing 10 [Source:HGNC Symbol;Acc:HGNC:19412]	2	9	1	0	3	3	4	4	10	4	3	6	3	10	ERCC-00057	0	0	0	0	0	0	0	0	0	ERCC-00057	0	0	0	0	0	0	0	0
ENSMUSG00000000340	13171	Dbt	dihydrolipoamide branched chain transacylase E2 [Source:MGI Symbol;Acc:MGI:105386]	191	193	267	219	231	269	309	301	347	ENSG00000004846	340273	ABCB5	ATP binding cassette subfamily B member 5 [Source:HGNC Symbol;Acc:HGNC:46]	0	5	0	4	1	0	2	2	9	5	3	1	1	1	ERCC-00054	1	0	1	0	0	0	0	2	0	ERCC-00054	0	0	0	0	0	0	0	0
ENSMUSG00000000346	23994	Dazap2	DAZ associated protein 2 [Source:MGI Symbol;Acc:MGI:1344344]	1192	1053	1559	1168	1258	1679	1345	1383	1684	ENSG00000004848	170302	ARX	aristaless related homeobox [Source:HGNC Symbol;Acc:HGNC:18060]	4	3	0	0	5	2	6	5	33	36	6	5	11	14	ERCC-00053	22	36	45	25	33	42	45	31	30	ERCC-00053	3	5	4	3	3	9	7	15
ENSMUSG00000000355	68995	Mcts1	malignant T cell amplified sequence 1 [Source:MGI Symbol;Acc:MGI:1916245]	35	75	88	61	73	88	79	91	115	ENSG00000004864	10165	SLC25A13	solute carrier family 25 member 13 [Source:HGNC Symbol;Acc:HGNC:10983]	401	443	158	245	396	432	290	427	333	371	281	308	272	293	ERCC-00051	2	4	3	2	2	6	4	4	5	ERCC-00051	2	1	1	1	2	1	0	0
ENSMUSG00000000359	19700	Rem1	rad and gem related GTP binding protein 1 [Source:MGI Symbol;Acc:MGI:1097696]	0	0	0	1	7	0	0	0	0	ENSG00000004866	7982	ST7	suppression of tumorigenicity 7 [Source:HGNC Symbol;Acc:HGNC:11351]	142	144	219	383	171	173	300	365	276	263	165	189	117	157	ERCC-00048	0	0	0	0	0	0	0	0	1	ERCC-00048	0	0	0	0	0	0	0	0
ENSMUSG00000000365	30054	Rnf17	ring finger protein 17 [Source:MGI Symbol;Acc:MGI:1353419]	28	15	27	23	29	21	70	63	80	ENSG00000004897	996	CDC27	cell division cycle 27 [Source:HGNC Symbol;Acc:HGNC:1728]	645	772	662	1066	712	714	814	1094	798	744	611	678	591	626	ERCC-00046	1145	1110	1952	1353	1272	2057	1491	1411	1428	ERCC-00046	387	441	405	544	420	496	432	622
ENSMUSG00000000374	216131	Trappc10	trafficking protein particle complex 10 [Source:MGI Symbol;Acc:MGI:1336209]	502	435	564	441	500	530	343	424	524	ENSG00000004939	6521	SLC4A1	solute carrier family 4 member 1 (Diego blood group) [Source:HGNC Symbol;Acc:HGNC:11027]	0	2	1	0	2	1	1	2	3	0	0	1	0	1	ERCC-00044	145	105	175	124	123	230	156	161	158	ERCC-00044	33	38	38	49	26	52	31	40
ENSMUSG00000000378	216527	Ccm2	cerebral cavernous malformation 2 [Source:MGI Symbol;Acc:MGI:2384924]	460	375	601	417	478	618	445	583	669	ENSG00000004948	799	CALCR	calcitonin receptor [Source:HGNC Symbol;Acc:HGNC:1440]	0	1	0	0	16	17	5	3	1	3	24	30	7	6	ERCC-00043	519	480	796	521	506	870	675	562	618	ERCC-00043	105	117	126	164	131	151	148	184
ENSMUSG00000000381	22373	Wap	whey acidic protein [Source:MGI Symbol;Acc:MGI:98943]	0	1	2	0	3	1	5	0	0	ENSG00000004961	3052	HCCS	holocytochrome c synthase [Source:HGNC Symbol;Acc:HGNC:4837]	73	66	54	89	46	49	51	94	41	64	43	45	32	40	ERCC-00042	381	329	607	368	398	636	466	422	447	ERCC-00042	214	209	205	299	207	278	176	289
ENSMUSG00000000384	21379	Tbrg4	transforming growth factor beta regulated gene 4 [Source:MGI Symbol;Acc:MGI:1100868]	727	690	944	742	817	938	673	815	849	ENSG00000004975	1856	DVL2	dishevelled segment polarity protein 2 [Source:HGNC Symbol;Acc:HGNC:3086]	448	516	242	346	401	421	434	649	390	390	266	379	314	410	ERCC-00041	1	0	0	0	2	0	0	0	0	ERCC-00041	0	0	0	0	0	0	0	0
ENSMUSG00000000385	50528	Tmprss2	transmembrane protease, serine 2 [Source:MGI Symbol;Acc:MGI:1354381]	5	1	14	3	19	9	9	16	15	ENSG00000005001	64063	PRSS22	serine protease 22 [Source:HGNC Symbol;Acc:HGNC:14368]	0	0	0	0	0	0	0	0	1	0	0	0	0	0	ERCC-00040	0	0	0	0	0	2	0	0	0	ERCC-00040	1	0	0	0	0	0	0	0
ENSMUSG00000000386	.	Mx1	MX dynamin-like GTPase 1 [Source:MGI Symbol;Acc:MGI:97243]	0	0	1	1	1	0	0	1	1	ENSG00000005007	5976	UPF1	UPF1 RNA helicase and ATPase [Source:HGNC Symbol;Acc:HGNC:9962]	295	379	250	505	460	502	408	510	419	373	308	343	367	391	ERCC-00039	3	4	7	7	3	8	5	7	9	ERCC-00039	1	2	3	4	1	1	3	2
ENSMUSG00000000392	14089	Fap	fibroblast activation protein [Source:MGI Symbol;Acc:MGI:109608]	104	93	58	54	87	79	137	120	104	ENSG00000005020	8935	SKAP2	src kinase associated phosphoprotein 2 [Source:HGNC Symbol;Acc:HGNC:15687]	14	26	74	118	29	26	67	85	72	50	58	58	35	53	ERCC-00035	127	76	187	124	108	166	114	108	94	ERCC-00035	18	27	19	41	26	33	29	42
ENSMUSG00000000394	14526	Gcg	glucagon [Source:MGI Symbol;Acc:MGI:95674]	0	0	0	0	1	0	0	0	0	ENSG00000005022	292	SLC25A5	solute carrier family 25 member 5 [Source:HGNC Symbol;Acc:HGNC:10991]	876	1004	560	913	845	961	941	1176	614	663	502	537	605	650	ERCC-00034	15	9	23	16	9	25	21	13	13	ERCC-00034	6	4	5	5	4	6	4	7
ENSMUSG00000000399	66108	Ndufa9	NADH:ubiquinone oxidoreductase subunit A9 [Source:MGI Symbol;Acc:MGI:1913358]	497	443	671	562	563	652	608	651	826	ENSG00000005059	55013	MCUB	mitochondrial calcium uniporter dominant negative beta subunit [Source:HGNC Symbol;Acc:HGNC:26076]	38	54	58	96	61	78	57	81	67	52	48	60	25	21	ERCC-00033	1	2	6	1	3	6	1	7	2	ERCC-00033	0	0	1	1	0	0	0	0
ENSMUSG00000000402	54156	Egfl6	EGF-like-domain, multiple 6 [Source:MGI Symbol;Acc:MGI:1858599]	0	6	3	3	4	10	6	2	6	ENSG00000005073	3207	HOXA11	homeobox A11 [Source:HGNC Symbol;Acc:HGNC:5101]	2	0	0	1	0	0	133	176	2	0	3	0	0	0	ERCC-00031	2	1	3	1	1	1	2	1	4	ERCC-00031	1	0	0	0	0	1	0	0
ENSMUSG00000000409	16818	Lck	lymphocyte protein tyrosine kinase [Source:MGI Symbol;Acc:MGI:96756]	86	71	138	87	120	152	162	116	147	ENSG00000005075	5439	POLR2J	RNA polymerase II subunit J [Source:HGNC Symbol;Acc:HGNC:9197]	89	119	76	112	117	122	92	144	104	83	66	111	56	76	ERCC-00028	8	5	2	2	0	5	2	1	2	ERCC-00028	1	0	2	3	0	3	2	0
ENSMUSG00000000411	58864	Tssk3	testis-specific serine kinase 3 [Source:MGI Symbol;Acc:MGI:1929914]	0	3	3	0	1	0	0	0	0	ENSG00000005100	56919	DHX33	DEAH-box helicase 33 [Source:HGNC Symbol;Acc:HGNC:16718]	188	231	118	162	296	290	238	380	233	216	206	226	246	257	ERCC-00025	125	113	212	146	118	201	159	160	129	ERCC-00025	22	32	34	50	30	43	40	48
ENSMUSG00000000416	30785	Cttnbp2	cortactin binding protein 2 [Source:MGI Symbol;Acc:MGI:1353467]	146	148	123	108	127	147	115	81	88	ENSG00000005102	4222	MEOX1	mesenchyme homeobox 1 [Source:HGNC Symbol;Acc:HGNC:7013]	15	19	100	130	0	2	69	83	11	18	7	8	7	1	ERCC-00024	0	0	0	0	0	0	0	0	0	ERCC-00024	0	0	0	0	0	0	0	0
ENSMUSG00000000420	14423	Galnt1	polypeptide N-acetylgalactosaminyltransferase 1 [Source:MGI Symbol;Acc:MGI:894693]	1307	1218	1744	1272	1417	1681	1468	1575	1913	ENSG00000005108	221981	THSD7A	thrombospondin type 1 domain containing 7A [Source:HGNC Symbol;Acc:HGNC:22207]	100	148	44	82	349	327	657	755	261	260	306	353	179	189	ERCC-00022	136	134	223	148	161	250	178	213	181	ERCC-00022	71	73	84	124	62	86	82	109
ENSMUSG00000000435	17877	Myf5	myogenic factor 5 [Source:MGI Symbol;Acc:MGI:97252]	0	0	0	0	2	0	0	2	0	ENSG00000005156	3980	LIG3	DNA ligase 3 [Source:HGNC Symbol;Acc:HGNC:6600]	547	631	199	262	752	832	648	902	682	626	511	522	733	801	ERCC-00019	18	12	8	7	5	18	20	6	18	ERCC-00019	3	5	6	7	4	4	2	13
ENSMUSG00000000439	67027	Mkrn2	makorin, ring finger protein, 2 [Source:MGI Symbol;Acc:MGI:1914277]	454	423	547	419	434	500	645	516	569	ENSG00000005175	79657	RPAP3	RNA polymerase II associated protein 3 [Source:HGNC Symbol;Acc:HGNC:26151]	253	255	98	155	236	266	222	287	219	232	148	189	210	233	ERCC-00017	0	0	0	0	0	0	0	0	0	ERCC-00017	0	0	0	0	0	0	0	0
ENSMUSG00000000440	19016	Pparg	peroxisome proliferator activated receptor gamma [Source:MGI Symbol;Acc:MGI:97747]	0	0	2	0	0	0	4	7	3	ENSG00000005187	6296	ACSM3	acyl-CoA synthetase medium chain family member 3 [Source:HGNC Symbol;Acc:HGNC:10522]	6	11	1	2	5	2	2	2	1	2	4	6	6	3	ERCC-00016	0	0	0	0	0	0	0	0	0	ERCC-00016	0	0	0	0	0	0	0	0
ENSMUSG00000000441	110157	Raf1	v-raf-leukemia viral oncogene 1 [Source:MGI Symbol;Acc:MGI:97847]	1592	1371	1951	1365	1518	1908	1508	1666	1991	ENSG00000005189	81691	REXO5	RNA exonuclease 5 [Source:HGNC Symbol;Acc:HGNC:24661]	28	31	4	11	37	28	22	20	19	14	13	15	18	26	ERCC-00014	81	69	130	79	76	117	108	97	93	ERCC-00014	14	14	8	21	15	17	14	26
ENSMUSG00000000486	54204	2022-09-01	septin 1 [Source:MGI Symbol;Acc:MGI:1858916]	65	57	62	60	57	62	67	70	71	ENSG00000005194	57019	CIAPIN1	cytokine induced apoptosis inhibitor 1 [Source:HGNC Symbol;Acc:HGNC:28050]	283	316	178	274	292	351	254	401	243	261	207	231	232	247	ERCC-00013	0	0	3	1	1	1	2	0	0	ERCC-00013	1	0	0	0	0	0	0	0
ENSMUSG00000000489	18591	Pdgfb	platelet derived growth factor, B polypeptide [Source:MGI Symbol;Acc:MGI:97528]	81	63	110	65	66	101	242	110	124	ENSG00000005206	56928	SPPL2B	signal peptide peptidase like 2B [Source:HGNC Symbol;Acc:HGNC:30627]	148	197	193	282	208	216	221	310	232	235	239	248	220	250	ERCC-00012	0	0	1	0	0	1	0	0	0	ERCC-00012	0	0	0	0	0	0	0	0
ENSMUSG00000000530	11482	Acvrl1	activin A receptor, type II-like 1 [Source:MGI Symbol;Acc:MGI:1338946]	63	69	135	89	106	117	172	162	155	ENSG00000005238	80256	FAM214B	family with sequence similarity 214 member B [Source:HGNC Symbol;Acc:HGNC:25666]	145	176	303	484	163	168	219	291	257	247	168	170	201	209	ERCC-00009	438	419	764	508	511	719	590	591	547	ERCC-00009	115	141	154	214	154	183	146	193
ENSMUSG00000000531	56149	Grasp	GRP1 (general receptor for phosphoinositides 1)-associated scaffold protein [Source:MGI Symbol;Acc:MGI:1860303]	138	162	197	120	140	160	177	145	143	ENSG00000005243	51226	COPZ2	coatomer protein complex subunit zeta 2 [Source:HGNC Symbol;Acc:HGNC:19356]	11	6	95	143	4	3	1	6	17	17	2	1	4	3	ERCC-00004	2428	2105	3710	2512	2576	4188	3091	2930	2995	ERCC-00004	914	992	1001	1530	1040	1209	1057	1494
ENSMUSG00000000532	11479	Acvr1b	activin A receptor, type 1B [Source:MGI Symbol;Acc:MGI:1338944]	412	339	444	314	343	449	643	523	402	ENSG00000005249	5577	PRKAR2B	protein kinase cAMP-dependent type II regulatory subunit beta [Source:HGNC Symbol;Acc:HGNC:9392]	384	482	9	13	152	163	137	191	201	189	114	122	142	184	ERCC-00003	766	681	1287	880	818	1383	987	964	984	ERCC-00003	250	250	279	378	271	319	281	361
ENSMUSG00000000538	216810	Tom1l2	target of myb1-like 2 (chicken) [Source:MGI Symbol;Acc:MGI:2443306]	194	144	223	175	203	243	236	219	230	ENSG00000005302	10943	MSL3	MSL complex subunit 3 [Source:HGNC Symbol;Acc:HGNC:7370]	108	124	95	176	142	142	144	194	150	134	118	127	136	137	ERCC-00002	10432	9114	17392	10688	10580	17926	13238	12932	12640	ERCC-00002	1538	1891	2117	3096	2258	2624	2115	2886
ENSMUSG00000000544	59290	Gpa33	glycoprotein A33 (transmembrane) [Source:MGI Symbol;Acc:MGI:1891703]	2	0	3	0	3	1	0	5	4	ENSG00000005339	1387	CREBBP	CREB binding protein [Source:HGNC Symbol;Acc:HGNC:2348]	1809	2024	1537	2384	2248	2202	2375	3323	2161	2146	1745	2024	1744	2025
ENSMUSG00000000552	29813	Zfp385a	zinc finger protein 385A [Source:MGI Symbol;Acc:MGI:1352495]	934	667	1023	769	849	1150	669	825	891	ENSG00000005379	9256	TSPOAP1	TSPO associated protein 1 [Source:HGNC Symbol;Acc:HGNC:16831]	17	24	1	2	50	50	68	72	95	85	64	66	81	95
ENSMUSG00000000555	16402	Itga5	integrin alpha 5 (fibronectin receptor alpha) [Source:MGI Symbol;Acc:MGI:96604]	569	495	515	448	552	597	746	713	814	ENSG00000005381	4353	MPO	myeloperoxidase [Source:HGNC Symbol;Acc:HGNC:7218]	0	0	0	0	0	1	0	0	2	0	1	1	0	0
ENSMUSG00000000560	14395	Gabra2	gamma-aminobutyric acid (GABA) A receptor, subunit alpha 2 [Source:MGI Symbol;Acc:MGI:95614]	10	4	16	3	14	6	18	8	4	ENSG00000005421	5444	PON1	paraoxonase 1 [Source:HGNC Symbol;Acc:HGNC:9204]	0	0	3	5	5	7	3	8	7	4	9	4	5	6
ENSMUSG00000000561	70465	Wdr77	WD repeat domain 77 [Source:MGI Symbol;Acc:MGI:1917715]	1380	1204	1957	1529	1734	1842	1278	1687	1956	ENSG00000005436	6936	GCFC2	GC-rich sequence DNA-binding factor 2 [Source:HGNC Symbol;Acc:HGNC:1317]	96	120	84	133	206	182	117	152	147	125	99	105	133	160
ENSMUSG00000000562	1154269296	Adora3	adenosine A3 receptor [Source:MGI Symbol;Acc:MGI:104847]	1	2	0	1	0	0	0	3	0	ENSG00000005448	84058	WDR54	WD repeat domain 54 [Source:HGNC Symbol;Acc:HGNC:25770]	86	94	48	73	146	169	118	163	116	144	116	133	155	168
ENSMUSG00000000563	11950	Atp5f1	ATP synthase, H+ transporting, mitochondrial F0 complex, subunit B1 [Source:MGI Symbol;Acc:MGI:1100495]	1257	1090	1731	1245	1459	1831	1421	1543	1789	ENSG00000005469	54677	CROT	carnitine O-octanoyltransferase [Source:HGNC Symbol;Acc:HGNC:2366]	49	56	25	45	100	102	88	97	61	53	38	31	30	36
ENSMUSG00000000567	20682	Sox9	SRY (sex determining region Y)-box 9 [Source:MGI Symbol;Acc:MGI:98371]	2062	1867	2152	1560	1713	2652	2583	2256	2333	ENSG00000005471	5244	ABCB4	ATP binding cassette subfamily B member 4 [Source:HGNC Symbol;Acc:HGNC:45]	2	8	0	0	11	4	9	21	15	8	11	12	7	1
ENSMUSG00000000568	11991	Hnrnpd	heterogeneous nuclear ribonucleoprotein D [Source:MGI Symbol;Acc:MGI:101947]	4443	3960	6050	4193	4756	5606	5034	5092	6169	ENSG00000005483	55904	KMT2E	lysine methyltransferase 2E [Source:HGNC Symbol;Acc:HGNC:18541]	843	1055	653	1091	1143	1267	1270	1787	1538	1517	1285	1403	1334	1627
ENSMUSG00000000579	100040563	Dynlt1c	dynein light chain Tctex-type 1C [Source:MGI Symbol;Acc:MGI:3807476]	48	69	50	39	48	62	45	97	85	ENSG00000005486	57414	RHBDD2	rhomboid domain containing 2 [Source:HGNC Symbol;Acc:HGNC:23082]	263	308	182	325	537	598	369	515	393	370	271	323	305	366
ENSMUSG00000000581	57316	C1d	C1D nuclear receptor co-repressor [Source:MGI Symbol;Acc:MGI:1927354]	445	345	551	412	497	584	470	545	621	ENSG00000005513	30812	SOX8	SRY-box transcription factor 8 [Source:HGNC Symbol;Acc:HGNC:11203]	207	276	20	9	160	175	97	148	41	35	50	62	22	20
ENSMUSG00000000594	14667	Gm2a	GM2 ganglioside activator protein [Source:MGI Symbol;Acc:MGI:95762]	61	60	63	40	60	78	128	82	105	ENSG00000005700	25998	IBTK	inhibitor of Bruton tyrosine kinase [Source:HGNC Symbol;Acc:HGNC:17853]	375	407	324	530	410	445	435	500	386	416	290	360	263	317
ENSMUSG00000000600	79264	Krit1	KRIT1, ankyrin repeat containing [Source:MGI Symbol;Acc:MGI:1930618]	976	877	1089	801	890	984	800	990	961	ENSG00000005801	7748	ZNF195	zinc finger protein 195 [Source:HGNC Symbol;Acc:HGNC:12986]	239	288	118	169	380	423	327	483	412	397	333	389	399	447
ENSMUSG00000000605	12727	Clcn4	chloride channel, voltage-sensitive 4 [Source:MGI Symbol;Acc:MGI:104571]	366	394	448	337	409	485	402	370	457	ENSG00000005810	23077	MYCBP2	MYC binding protein 2 [Source:HGNC Symbol;Acc:HGNC:23386]	888	1118	1048	1633	1022	1157	1188	1619	1247	1201	863	1086	850	979
ENSMUSG00000000606	669149	Vmn2r88	vomeronasal 2, receptor 88 [Source:MGI Symbol;Acc:MGI:1316662]	0	3	0	1	2	0	0	0	0	ENSG00000005812	26224	FBXL3	F-box and leucine rich repeat protein 3 [Source:HGNC Symbol;Acc:HGNC:13599]	151	173	222	380	201	204	178	253	184	188	216	227	157	156
ENSMUSG00000000617	108072	Grm6	glutamate receptor, metabotropic 6 [Source:MGI Symbol;Acc:MGI:1351343]	1	1	0	0	13	0	5	19	0	ENSG00000005844	3683	ITGAL	integrin subunit alpha L [Source:HGNC Symbol;Acc:HGNC:6148]	0	0	0	0	3	2	1	2	6	3	1	2	1	0
ENSMUSG00000000627	20355	Sema4f	sema domain, immunoglobulin domain (Ig), TM domain, and short cytoplasmic domain [Source:MGI Symbol;Acc:MGI:1340055]	19	14	26	24	27	26	43	25	20	ENSG00000005882	5164	PDK2	pyruvate dehydrogenase kinase 2 [Source:HGNC Symbol;Acc:HGNC:8810]	135	161	231	384	225	254	181	308	216	218	195	165	171	190
ENSMUSG00000000628	15277	Hk2	hexokinase 2 [Source:MGI Symbol;Acc:MGI:1315197]	1735	1522	2467	1826	2207	2390	7866	5093	4488	ENSG00000005884	3675	ITGA3	integrin subunit alpha 3 [Source:HGNC Symbol;Acc:HGNC:6139]	50	52	1056	1652	593	587	89	106	172	178	174	187	47	53
ENSMUSG00000000631	360013	Myo18a	myosin XVIIIA [Source:MGI Symbol;Acc:MGI:2667185]	821	702	952	705	690	881	745	796	887	ENSG00000005889	7543	ZFX	zinc finger protein X-linked [Source:HGNC Symbol;Acc:HGNC:12869]	486	575	272	405	659	652	318	410	351	313	286	349	231	269
ENSMUSG00000000632	20370	Sez6	seizure related gene 6 [Source:MGI Symbol;Acc:MGI:104745]	5	9	8	10	5	13	4	5	5	ENSG00000005893	3920	LAMP2	lysosomal associated membrane protein 2 [Source:HGNC Symbol;Acc:HGNC:6501]	578	744	714	1170	380	388	461	591	464	471	347	394	296	319
ENSMUSG00000000673	107766	Haao	3-hydroxyanthranilate 3,4-dioxygenase [Source:MGI Symbol;Acc:MGI:1349444]	1	1	1	0	2	0	1	3	3	ENSG00000005961	3674	ITGA2B	integrin subunit alpha 2b [Source:HGNC Symbol;Acc:HGNC:6138]	4	10	0	3	4	4	8	11	17	19	9	13	18	23
ENSMUSG00000000682	23833	Cd52	CD52 antigen [Source:MGI Symbol;Acc:MGI:1346088]	2	3	0	4	0	1	0	0	0	ENSG00000005981	51666	ASB4	ankyrin repeat and SOCS box containing 4 [Source:HGNC Symbol;Acc:HGNC:16009]	0	1	1	2	2	0	13	23	1	5	0	3	2	1
ENSMUSG00000000686	67477	Abhd15	abhydrolase domain containing 15 [Source:MGI Symbol;Acc:MGI:1914727]	20	25	38	20	47	28	31	27	37	ENSG00000006007	51573	GDE1	glycerophosphodiester phosphodiesterase 1 [Source:HGNC Symbol;Acc:HGNC:29644]	239	300	290	405	363	391	352	429	386	352	243	282	286	332
ENSMUSG00000000690	15414	Hoxb6	homeobox B6 [Source:MGI Symbol;Acc:MGI:96187]	0	0	0	2	4	0	0	2	0	ENSG00000006015	55049	REX1BD	required for excision 1-B domain containing [Source:HGNC Symbol;Acc:HGNC:26098]	45	57	34	48	55	44	37	51	45	46	38	42	41	62
ENSMUSG00000000693	16950	Loxl3	lysyl oxidase-like 3 [Source:MGI Symbol;Acc:MGI:1337004]	72	47	72	57	75	111	104	106	66	ENSG00000006016	9244	CRLF1	cytokine receptor like factor 1 [Source:HGNC Symbol;Acc:HGNC:2364]	6	5	243	320	1	0	47	52	1	4	1	5	2	2
ENSMUSG00000000701	27382	Tcl1b5	T cell leukemia/lymphoma 1B, 5 [Source:MGI Symbol;Acc:MGI:1351635]	0	0	0	0	0	0	0	0	0	ENSG00000006025	114881	OSBPL7	oxysterol binding protein like 7 [Source:HGNC Symbol;Acc:HGNC:16387]	46	72	91	120	69	47	51	89	74	85	69	61	82	88
ENSMUSG00000000706	12231	Btn1a1	butyrophilin, subfamily 1, member A1 [Source:MGI Symbol;Acc:MGI:103118]	4	4	0	3	1	0	2	2	0	ENSG00000006042	26022	TMEM98	transmembrane protein 98 [Source:HGNC Symbol;Acc:HGNC:24529]	257	349	170	300	417	420	388	471	326	374	337	329	283	343
ENSMUSG00000000708	18519	Kat2b	K(lysine) acetyltransferase 2B [Source:MGI Symbol;Acc:MGI:1343094]	101	81	138	90	114	115	93	110	94	ENSG00000006047	51087	YBX2	Y-box binding protein 2 [Source:HGNC Symbol;Acc:HGNC:17948]	14	27	0	3	3	3	14	18	28	19	12	13	35	43
ENSMUSG00000000711	19344	Rab5b	RAB5B, member RAS oncogene family [Source:MGI Symbol;Acc:MGI:105938]	560	515	666	491	511	695	702	744	722	ENSG00000006059	3883	KRT33A	keratin 33A [Source:HGNC Symbol;Acc:HGNC:6450]	0	0	0	0	0	0	0	0	0	0	0	0	0	0
ENSMUSG00000000724	12957	Cryba1	crystallin, beta A1 [Source:MGI Symbol;Acc:MGI:88518]	10	5	10	7	8	5	9	5	4	ENSG00000006062	9020	MAP3K14	mitogen-activated protein kinase kinase kinase 14 [Source:HGNC Symbol;Acc:HGNC:6853]	93	128	29	63	110	99	71	116	99	99	70	80	52	62
ENSMUSG00000000730	54427	Dnmt3l	DNA (cytosine-5-)-methyltransferase 3-like [Source:MGI Symbol;Acc:MGI:1859287]	0	0	0	2	3	0	4	0	0	ENSG00000006071	6833	ABCC8	ATP binding cassette subfamily C member 8 [Source:HGNC Symbol;Acc:HGNC:59]	23	9	0	3	0	2	7	11	17	11	15	14	21	26
ENSMUSG00000000731	11634	Aire	autoimmune regulator (autoimmune polyendocrinopathy candidiasis ectodermal dystrophy) [Source:MGI Symbol;Acc:MGI:1338803]	0	2	2	1	1	2	37	11	8	ENSG00000006116	10368	CACNG3	calcium voltage-gated channel auxiliary subunit gamma 3 [Source:HGNC Symbol;Acc:HGNC:1407]	0	0	1	0	0	0	0	4	5	2	4	0	0	0
ENSMUSG00000000732	50723	Icosl	icos ligand [Source:MGI Symbol;Acc:MGI:1354701]	38	43	53	42	64	63	59	60	51	ENSG00000006118	54972	TMEM132A	transmembrane protein 132A [Source:HGNC Symbol;Acc:HGNC:31092]	336	410	308	518	403	387	516	760	631	614	501	559	489	533
ENSMUSG00000000738	234847	Spg7	SPG7, paraplegin matrix AAA peptidase subunit [Source:MGI Symbol;Acc:MGI:2385906]	425	392	516	381	400	483	541	459	518	ENSG00000006125	163	AP2B1	adaptor related protein complex 2 subunit beta 1 [Source:HGNC Symbol;Acc:HGNC:563]	2022	2271	1605	2667	2531	2671	2693	3406	2601	2365	1794	2046	1942	2242
ENSMUSG00000000739	57429	Sult5a1	sulfotransferase family 5A, member 1 [Source:MGI Symbol;Acc:MGI:1931463]	4	3	0	10	19	11	12	10	2	ENSG00000006128	6863	TAC1	tachykinin precursor 1 [Source:HGNC Symbol;Acc:HGNC:11517]	4	4	0	1	1	2	2	5	8	3	2	1	2	1
ENSMUSG00000000740	270106	Rpl13	ribosomal protein L13 [Source:MGI Symbol;Acc:MGI:105922]	5702	4995	7874	5670	6313	8170	7419	7905	9908	ENSG00000006194	10127	ZNF263	zinc finger protein 263 [Source:HGNC Symbol;Acc:HGNC:13056]	120	156	96	138	151	162	113	204	150	122	133	132	94	143
ENSMUSG00000000743	234852	Chmp1a	charged multivesicular body protein 1A [Source:MGI Symbol;Acc:MGI:1920159]	386	271	478	332	398	455	280	298	417	ENSG00000006210	6376	CX3CL1	C-X3-C motif chemokine ligand 1 [Source:HGNC Symbol;Acc:HGNC:10647]	55	53	13	16	146	139	53	54	76	65	86	78	52	58
ENSMUSG00000000751	68275	Rpa1	replication protein A1 [Source:MGI Symbol;Acc:MGI:1915525]	1816	1661	2529	1781	2096	2468	1887	2149	2486	ENSG00000006282	64847	SPATA20	spermatogenesis associated 20 [Source:HGNC Symbol;Acc:HGNC:26125]	88	71	166	261	102	118	76	144	102	89	59	58	79	72
ENSMUSG00000000753	20317	Serpinf1	serine (or cysteine) peptidase inhibitor, clade F, member 1 [Source:MGI Symbol;Acc:MGI:108080]	416	285	422	299	368	489	458	451	497	ENSG00000006283	8913	CACNA1G	calcium voltage-gated channel subunit alpha1 G [Source:HGNC Symbol;Acc:HGNC:1394]	54	73	46	97	8	7	221	342	108	122	26	27	77	67
ENSMUSG00000000759	259279	Tubgcp3	tubulin, gamma complex associated protein 3 [Source:MGI Symbol;Acc:MGI:2183752]	1011	884	1198	884	1002	1235	929	1068	1122	ENSG00000006327	51330	TNFRSF12A	TNF receptor superfamily member 12A [Source:HGNC Symbol;Acc:HGNC:18152]	34	52	151	248	57	58	43	85	66	80	41	28	40	39
ENSMUSG00000000766	18390	Oprm1	opioid receptor, mu 1 [Source:MGI Symbol;Acc:MGI:97441]	3	4	0	0	2	1	1	1	1	ENSG00000006377	1750	DLX6	distal-less homeobox 6 [Source:HGNC Symbol;Acc:HGNC:2919]	4	4	0	1	0	1	0	0	11	16	2	1	2	8
ENSMUSG00000000776	67065	Polr3d	polymerase (RNA) III (DNA directed) polypeptide D [Source:MGI Symbol;Acc:MGI:1914315]	335	263	418	353	362	407	266	351	478	ENSG00000006432	4293	MAP3K9	mitogen-activated protein kinase kinase kinase 9 [Source:HGNC Symbol;Acc:HGNC:6861]	64	92	84	114	85	116	87	123	291	276	154	175	343	391
ENSMUSG00000000782	21414	Tcf7	transcription factor 7, T cell specific [Source:MGI Symbol;Acc:MGI:98507]	352	254	454	378	439	467	385	494	513	ENSG00000006451	5898	RALA	RAS like proto-oncogene A [Source:HGNC Symbol;Acc:HGNC:9839]	181	212	143	270	228	245	230	343	219	208	146	169	151	177
ENSMUSG00000000787	13205	Ddx3x	DEAD/H (Asp-Glu-Ala-Asp/His) box polypeptide 3, X-linked [Source:MGI Symbol;Acc:MGI:103064]	7710	6533	10339	8191	9336	10638	7556	8359	9897	ENSG00000006453	55971	BAIAP2L1	BAI1 associated protein 2 like 1 [Source:HGNC Symbol;Acc:HGNC:21649]	23	37	20	27	17	29	44	35	47	48	25	33	87	105
ENSMUSG00000000791	16161	Il12rb1	interleukin 12 receptor, beta 1 [Source:MGI Symbol;Acc:MGI:104579]	0	0	0	1	0	0	2	3	0	ENSG00000006459	80853	KDM7A	lysine demethylase 7A [Source:HGNC Symbol;Acc:HGNC:22224]	83	114	144	199	133	139	175	263	231	212	189	226	257	282
ENSMUSG00000000792	114479	Slc5a5	solute carrier family 5 (sodium iodide symporter), member 5 [Source:MGI Symbol;Acc:MGI:2149330]	5	5	3	4	1	3	2	12	5	ENSG00000006468	2115	ETV1	ETS variant 1 [Source:HGNC Symbol;Acc:HGNC:3490]	336	465	751	1104	380	484	427	500	246	255	216	224	148	151
ENSMUSG00000000794	140493	Kcnn3	potassium intermediate/small conductance calcium-activated channel, subfamily N, member 3 [Source:MGI Symbol;Acc:MGI:2153183]	44	28	27	22	37	30	60	46	43	ENSG00000006530	55750	AGK	acylglycerol kinase [Source:HGNC Symbol;Acc:HGNC:21869]	123	165	97	143	222	272	220	288	180	173	172	180	162	188
ENSMUSG00000000804	237898	Usp32	ubiquitin specific peptidase 32 [Source:MGI Symbol;Acc:MGI:2144475]	624	474	724	505	578	712	594	650	676	ENSG00000006534	221	ALDH3B1	aldehyde dehydrogenase 3 family member B1 [Source:HGNC Symbol;Acc:HGNC:410]	5	10	0	6	17	25	11	10	23	9	17	34	4	13
ENSMUSG00000000805	12351	Car4	carbonic anhydrase 4 [Source:MGI Symbol;Acc:MGI:1096574]	42	23	89	70	81	57	81	94	118	ENSG00000006555	55001	TTC22	tetratricopeptide repeat domain 22 [Source:HGNC Symbol;Acc:HGNC:26067]	2	0	0	0	3	4	3	1	6	3	2	0	3	0
ENSMUSG00000000811	232223	Txnrd3	thioredoxin reductase 3 [Source:MGI Symbol;Acc:MGI:2386711]	135	109	154	119	126	158	165	140	144	ENSG00000006576	57157	PHTF2	putative homeodomain transcription factor 2 [Source:HGNC Symbol;Acc:HGNC:13411]	212	248	408	614	175	207	229	293	248	205	199	248	171	197
ENSMUSG00000000817	14103	Fasl	Fas ligand (TNF superfamily, member 6) [Source:MGI Symbol;Acc:MGI:99255]	0	0	0	1	2	1	0	0	0	ENSG00000006606	10344	CCL26	C-C motif chemokine ligand 26 [Source:HGNC Symbol;Acc:HGNC:10625]	0	0	1	0	0	0	0	0	0	0	0	0	0	0
ENSMUSG00000000823	269401	Zfp512b	zinc finger protein 512B [Source:MGI Symbol;Acc:MGI:2685478]	879	699	888	684	720	896	677	802	817	ENSG00000006607	9855	FARP2	FERM, ARH/RhoGEF and pleckstrin domain protein 2 [Source:HGNC Symbol;Acc:HGNC:16460]	419	505	328	496	363	352	532	656	522	455	358	350	285	358
ENSMUSG00000000826	13002	Dnajc5	DnaJ heat shock protein family (Hsp40) member C5 [Source:MGI Symbol;Acc:MGI:892995]	1280	1108	1470	1176	1346	1358	1900	1564	1744	ENSG00000006611	10083	USH1C	USH1 protein network component harmonin [Source:HGNC Symbol;Acc:HGNC:12597]	0	0	0	0	1	0	1	3	0	2	0	0	2	0
ENSMUSG00000000827	66314	Tpd52l2	tumor protein D52-like 2 [Source:MGI Symbol;Acc:MGI:1913564]	484	413	624	453	427	597	510	547	590	ENSG00000006625	79017	GGCT	gamma-glutamylcyclotransferase [Source:HGNC Symbol;Acc:HGNC:21705]	73	86	39	72	103	122	83	103	59	37	52	43	38	47
ENSMUSG00000000838	14265	Fmr1	fragile X mental retardation 1 [Source:MGI Symbol;Acc:MGI:95564]	1319	1226	1718	1299	1447	1642	1479	1629	1991	ENSG00000006634	10926	DBF4	DBF4 zinc finger [Source:HGNC Symbol;Acc:HGNC:17364]	131	159	50	76	217	246	215	301	181	157	161	142	162	181
ENSMUSG00000000861	14025	Bcl11a	B cell CLL/lymphoma 11A (zinc finger protein) [Source:MGI Symbol;Acc:MGI:106190]	143	195	92	53	74	99	63	92	39	ENSG00000006638	6915	TBXA2R	thromboxane A2 receptor [Source:HGNC Symbol;Acc:HGNC:11608]	0	2	18	28	0	1	1	3	9	7	3	3	5	1
ENSMUSG00000000869	16189	Il4	interleukin 4 [Source:MGI Symbol;Acc:MGI:96556]	0	0	0	0	0	0	0	0	0	ENSG00000006652	3475	IFRD1	interferon related developmental regulator 1 [Source:HGNC Symbol;Acc:HGNC:5456]	217	268	130	223	277	306	251	333	271	252	223	235	178	274
ENSMUSG00000000876	59038	Pxmp4	peroxisomal membrane protein 4 [Source:MGI Symbol;Acc:MGI:1891701]	41	37	57	29	36	52	90	64	74	ENSG00000006659	56891	LGALS14	galectin 14 [Source:HGNC Symbol;Acc:HGNC:30054]	0	0	0	0	0	0	0	0	0	0	0	0	0	0
ENSMUSG00000000881	53310	Dlg3	discs large MAGUK scaffold protein 3 [Source:MGI Symbol;Acc:MGI:1888986]	628	531	794	575	610	840	697	739	775	ENSG00000006695	1352	COX10	cytochrome c oxidase assembly factor heme A:farnesyltransferase COX10 [Source:HGNC Symbol;Acc:HGNC:2260]	156	207	119	184	225	212	259	366	183	182	188	200	191	214
ENSMUSG00000000884	13972	Gnb1l	guanine nucleotide binding protein (G protein), beta polypeptide 1-like [Source:MGI Symbol;Acc:MGI:1338057]	66	51	104	78	68	77	35	56	82	ENSG00000006704	9569	GTF2IRD1	GTF2I repeat domain containing 1 [Source:HGNC Symbol;Acc:HGNC:4661]	372	436	116	167	228	220	299	437	248	263	193	194	189	254
ENSMUSG00000000889	13166	Dbh	dopamine beta hydroxylase [Source:MGI Symbol;Acc:MGI:94864]	0	0	0	0	0	0	1	0	0	ENSG00000006712	54623	PAF1	PAF1 homolog, Paf1/RNA polymerase II complex component [Source:HGNC Symbol;Acc:HGNC:25459]	279	371	203	325	318	368	311	464	306	313	256	267	182	210
ENSMUSG00000000901	17385	Mmp11	matrix metallopeptidase 11 [Source:MGI Symbol;Acc:MGI:97008]	92	90	113	82	83	115	111	81	111	ENSG00000006715	27072	VPS41	VPS41 subunit of HOPS complex [Source:HGNC Symbol;Acc:HGNC:12713]	375	454	355	531	389	448	406	504	430	403	379	417	298	281
ENSMUSG00000000902	20587	Smarcb1	SWI/SNF related, matrix associated, actin dependent regulator of chromatin, subfamily b, member 1 [Source:MGI Symbol;Acc:MGI:1328366]	1531	1301	1903	1417	1595	1781	1735	2023	2062	ENSG00000006740	9912	ARHGAP44	Rho GTPase activating protein 44 [Source:HGNC Symbol;Acc:HGNC:29096]	16	21	16	36	17	20	56	74	74	54	52	48	70	79
ENSMUSG00000000903	22364	Vpreb3	pre-B lymphocyte gene 3 [Source:MGI Symbol;Acc:MGI:98938]	1	1	1	0	0	1	1	3	0	ENSG00000006744	60528	ELAC2	elaC ribonuclease Z 2 [Source:HGNC Symbol;Acc:HGNC:14198]	292	366	230	315	302	316	333	421	257	227	225	260	256	304
ENSMUSG00000000915	29816	Hip1r	huntingtin interacting protein 1 related [Source:MGI Symbol;Acc:MGI:1352504]	300	194	439	261	255	390	333	306	299	ENSG00000006747	85477	SCIN	scinderin [Source:HGNC Symbol;Acc:HGNC:21695]	5	5	14	33	5	3	3	1	9	4	4	1	2	2
ENSMUSG00000000916	100609	Nsun5	NOL1/NOP2/Sun domain family, member 5 [Source:MGI Symbol;Acc:MGI:2140844]	183	186	261	259	260	284	192	245	281	ENSG00000006756	414	ARSD	arylsulfatase D [Source:HGNC Symbol;Acc:HGNC:717]	34	28	22	45	37	29	28	23	38	29	26	45	38	29
ENSMUSG00000000934	72960	Top1mt	DNA topoisomerase 1, mitochondrial [Source:MGI Symbol;Acc:MGI:1920210]	86	60	83	73	74	106	160	109	144	ENSG00000006757	8228	PNPLA4	patatin like phospholipase domain containing 4 [Source:HGNC Symbol;Acc:HGNC:24887]	3	7	34	50	1	2	11	21	10	10	12	9	16	10
ENSMUSG00000000938	15395	Hoxa10	homeobox A10 [Source:MGI Symbol;Acc:MGI:96171]	0	1	0	0	4	0	1	8	1	ENSG00000006788	8735	MYH13	myosin heavy chain 13 [Source:HGNC Symbol;Acc:HGNC:7571]	0	0	0	0	0	0	2	3	0	0	0	0	0	0
ENSMUSG00000000942	15401	Hoxa4	homeobox A4 [Source:MGI Symbol;Acc:MGI:96176]	1	0	0	0	0	0	0	3	0	ENSG00000006831	79602	ADIPOR2	adiponectin receptor 2 [Source:HGNC Symbol;Acc:HGNC:24041]	258	330	260	403	320	378	336	378	326	308	228	222	234	313
ENSMUSG00000000948	.	Gm38393	predicted gene, 38393 [Source:MGI Symbol;Acc:MGI:5613898]	517	440	485	428	413	414	992	806	805	ENSG00000006837	51265	CDKL3	cyclin dependent kinase like 3 [Source:HGNC Symbol;Acc:HGNC:15483]	5	15	5	8	7	20	18	19	15	15	17	25	14	27
ENSMUSG00000000957	17387	Mmp14	matrix metallopeptidase 14 (membrane-inserted) [Source:MGI Symbol;Acc:MGI:101900]	378	371	517	328	410	431	510	462	492	ENSG00000007001	151531	UPP2	uridine phosphorylase 2 [Source:HGNC Symbol;Acc:HGNC:23061]	2	0	1	2	3	3	1	0	8	8	2	2	2	1
ENSMUSG00000000958	20540	Slc7a7	solute carrier family 7 (cationic amino acid transporter, y+ system), member 7 [Source:MGI Symbol;Acc:MGI:1337120]	11	8	22	15	16	22	53	12	18	ENSG00000007038	10942	PRSS21	serine protease 21 [Source:HGNC Symbol;Acc:HGNC:9485]	0	0	0	0	0	0	0	0	0	0	0	0	0	0
ENSMUSG00000000959	69089	Oxa1l	oxidase assembly 1-like [Source:MGI Symbol;Acc:MGI:1916339]	629	555	795	564	649	837	764	683	856	ENSG00000007047	57787	MARK4	microtubule affinity regulating kinase 4 [Source:HGNC Symbol;Acc:HGNC:13538]	141	192	145	212	209	213	198	262	186	213	143	164	182	221
ENSMUSG00000000976	217026	Heatr6	HEAT repeat containing 6 [Source:MGI Symbol;Acc:MGI:1919790]	603	487	642	566	626	740	618	598	756	ENSG00000007062	8842	PROM1	prominin 1 [Source:HGNC Symbol;Acc:HGNC:9454]	170	217	826	1360	529	668	555	748	555	573	468	615	205	252
ENSMUSG00000000982	20302	Ccl3	chemokine (C-C motif) ligand 3 [Source:MGI Symbol;Acc:MGI:98260]	0	0	0	3	0	1	0	0	2	ENSG00000007080	115098	CCDC124	coiled-coil domain containing 124 [Source:HGNC Symbol;Acc:HGNC:25171]	83	96	35	97	84	103	109	103	85	60	55	64	41	54
ENSMUSG00000000983	14038	Wfdc18	WAP four-disulfide core domain 18 [Source:MGI Symbol;Acc:MGI:107506]	0	0	0	0	0	0	0	0	0	ENSG00000007129	90273	CEACAM21	carcinoembryonic antigen related cell adhesion molecule 21 [Source:HGNC Symbol;Acc:HGNC:28834]	2	7	0	0	0	0	0	2	6	4	0	3	0	0
ENSMUSG00000001014	78369	Icam4	intercellular adhesion molecule 4, Landsteiner-Wiener blood group [Source:MGI Symbol;Acc:MGI:1925619]	2	7	0	7	4	2	1	4	5	ENSG00000007168	5048	PAFAH1B1	platelet activating factor acetylhydrolase 1b regulatory subunit 1 [Source:HGNC Symbol;Acc:HGNC:8574]	999	1199	763	1308	1309	1443	1220	1551	1313	1258	897	955	751	954
ENSMUSG00000001016	67781	Ilf2	interleukin enhancer binding factor 2 [Source:MGI Symbol;Acc:MGI:1915031]	2187	2005	2957	2168	2248	2753	2115	2659	2725	ENSG00000007171	4843	NOS2	nitric oxide synthase 2 [Source:HGNC Symbol;Acc:HGNC:7873]	1	2	0	1	0	0	3	5	18	15	0	1	12	8
ENSMUSG00000001017	66511	Chtop	chromatin target of PRMT1 [Source:MGI Symbol;Acc:MGI:1913761]	2355	2086	2962	2139	2487	2993	2028	2303	2884	ENSG00000007174	1770	DNAH9	dynein axonemal heavy chain 9 [Source:HGNC Symbol;Acc:HGNC:2953]	5	8	3	5	1	1	1	5	16	17	5	4	11	6
ENSMUSG00000001018	20615	Snapin	SNAP-associated protein [Source:MGI Symbol;Acc:MGI:1333745]	183	182	247	166	192	233	277	193	248	ENSG00000007202	9703	KIAA0100	KIAA0100 [Source:HGNC Symbol;Acc:HGNC:28960]	1504	1683	1167	1687	1629	1687	1565	2123	1372	1379	1180	1390	1178	1331
ENSMUSG00000001020	20198	S100a4	S100 calcium binding protein A4 [Source:MGI Symbol;Acc:MGI:1330282]	0	2	0	0	1	1	1	0	1	ENSG00000007216	9058	SLC13A2	solute carrier family 13 member 2 [Source:HGNC Symbol;Acc:HGNC:10917]	1	1	0	0	2	1	0	0	1	0	0	0	0	0
ENSMUSG00000001021	20197	S100a3	S100 calcium binding protein A3 [Source:MGI Symbol;Acc:MGI:1338849]	0	0	0	0	4	0	0	3	0	ENSG00000007237	8522	GAS7	growth arrest specific 7 [Source:HGNC Symbol;Acc:HGNC:4169]	438	476	558	833	3	6	114	139	189	184	18	15	132	150
ENSMUSG00000001023	20199	S100a5	S100 calcium binding protein A5 [Source:MGI Symbol;Acc:MGI:1338915]	0	1	0	0	0	0	0	0	0	ENSG00000007255	79090	TRAPPC6A	trafficking protein particle complex 6A [Source:HGNC Symbol;Acc:HGNC:23069]	5	1	3	3	5	4	5	4	4	9	4	5	3	9
ENSMUSG00000001025	20200	S100a6	S100 calcium binding protein A6 (calcyclin) [Source:MGI Symbol;Acc:MGI:1339467]	34	18	37	45	13	37	18	32	41	ENSG00000007264	4145	MATK	megakaryocyte-associated tyrosine kinase [Source:HGNC Symbol;Acc:HGNC:6906]	0	1	0	0	0	0	0	0	1	1	0	0	0	0
ENSMUSG00000001027	110880	Scn4a	sodium channel, voltage-gated, type IV, alpha [Source:MGI Symbol;Acc:MGI:98250]	1	1	3	2	2	1	0	5	1	ENSG00000007306	1087	CEACAM7	carcinoembryonic antigen related cell adhesion molecule 7 [Source:HGNC Symbol;Acc:HGNC:1819]	0	0	0	0	0	1	0	0	0	0	0	1	0	0
ENSMUSG00000001029	15896	Icam2	intercellular adhesion molecule 2 [Source:MGI Symbol;Acc:MGI:96394]	15	24	37	18	22	34	30	55	54	ENSG00000007312	974	CD79B	CD79b molecule [Source:HGNC Symbol;Acc:HGNC:1699]	0	2	0	0	0	0	1	0	1	0	0	0	5	2
ENSMUSG00000001034	23939	Mapk7	mitogen-activated protein kinase 7 [Source:MGI Symbol;Acc:MGI:1346347]	802	633	856	557	688	764	793	848	835	ENSG00000007314	6329	SCN4A	sodium voltage-gated channel alpha subunit 4 [Source:HGNC Symbol;Acc:HGNC:10591]	2	0	2	3	0	0	9	11	6	4	2	0	19	25
ENSMUSG00000001036	13855	Epn2	epsin 2 [Source:MGI Symbol;Acc:MGI:1333766]	337	328	478	340	364	462	429	476	564	ENSG00000007341	54879	ST7L	suppression of tumorigenicity 7 like [Source:HGNC Symbol;Acc:HGNC:18441]	82	85	80	89	84	102	78	85	90	107	67	86	117	140
ENSMUSG00000001039	27078	B9d1	B9 protein domain 1 [Source:MGI Symbol;Acc:MGI:1351471]	84	86	114	112	106	116	97	96	116	ENSG00000007350	8277	TKTL1	transketolase like 1 [Source:HGNC Symbol;Acc:HGNC:11835]	8	6	2	1	0	0	11	18	7	2	7	8	5	4
ENSMUSG00000001052	99683	Sec24b	Sec24 related gene family, member B (S. cerevisiae) [Source:MGI Symbol;Acc:MGI:2139764]	1395	1312	1940	1427	1730	1886	1543	1747	1955	ENSG00000007372	5080	PAX6	paired box 6 [Source:HGNC Symbol;Acc:HGNC:8620]	8	7	1	3	531	568	633	985	378	380	613	768	123	115
ENSMUSG00000001053	212706	N4bp3	NEDD4 binding protein 3 [Source:MGI Symbol;Acc:MGI:2442218]	98	105	104	87	116	156	143	145	169	ENSG00000007376	113000	RPUSD1	RNA pseudouridine synthase domain containing 1 [Source:HGNC Symbol;Acc:HGNC:14173]	93	107	76	93	106	108	97	152	53	64	55	86	93	79
ENSMUSG00000001054	66089	Rmnd5b	required for meiotic nuclear division 5 homolog B [Source:MGI Symbol;Acc:MGI:1913339]	160	148	175	131	134	189	139	160	196	ENSG00000007384	64285	RHBDF1	rhomboid 5 homolog 1 [Source:HGNC Symbol;Acc:HGNC:20561]	108	127	162	321	120	145	135	159	135	125	127	128	135	162
ENSMUSG00000001056	52530	Nhp2	NHP2 ribonucleoprotein [Source:MGI Symbol;Acc:MGI:1098547]	509	392	843	588	648	740	409	696	865	ENSG00000007392	55692	LUC7L	LUC7 like [Source:HGNC Symbol;Acc:HGNC:6723]	279	358	225	315	385	428	461	704	471	485	450	485	562	627
ENSMUSG00000001062	72325	Vps9d1	VPS9 domain containing 1 [Source:MGI Symbol;Acc:MGI:1914143]	165	167	208	187	166	243	191	179	227	ENSG00000007402	9254	CACNA2D2	calcium voltage-gated channel auxiliary subunit alpha2delta 2 [Source:HGNC Symbol;Acc:HGNC:1400]	148	196	12	15	21	15	67	87	180	190	74	68	281	346
ENSMUSG00000001065	57247	Zfp276	zinc finger protein (C2H2 type) 276 [Source:MGI Symbol;Acc:MGI:1888495]	223	202	243	205	190	253	198	255	233	ENSG00000007516	8938	BAIAP3	BAI1 associated protein 3 [Source:HGNC Symbol;Acc:HGNC:948]	35	53	3	6	88	92	67	121	149	170	158	169	139	188
ENSMUSG00000001076	239659	C1ql4	complement component 1, q subcomponent-like 4 [Source:MGI Symbol;Acc:MGI:3579909]	2	1	3	5	4	3	0	1	6	ENSG00000007520	115939	TSR3	TSR3 ribosome maturation factor [Source:HGNC Symbol;Acc:HGNC:14175]	85	85	49	70	49	69	54	68	53	73	32	43	30	30
ENSMUSG00000001082	68294	Mfsd10	major facilitator superfamily domain containing 10 [Source:MGI Symbol;Acc:MGI:1915544]	228	207	297	226	233	295	275	292	328	ENSG00000007541	9091	PIGQ	phosphatidylinositol glycan anchor biosynthesis class Q [Source:HGNC Symbol;Acc:HGNC:14135]	199	219	153	253	306	320	265	405	248	235	224	234	181	199
ENSMUSG00000001089	269593	Luzp1	leucine zipper protein 1 [Source:MGI Symbol;Acc:MGI:107629]	2731	2342	3300	2525	2731	3310	2671	3100	3700	ENSG00000007545	57585	CRAMP1	cramped chromatin regulator homolog 1 [Source:HGNC Symbol;Acc:HGNC:14122]	249	344	191	331	359	373	364	471	393	356	378	413	369	371
ENSMUSG00000001095	20500	Slc13a2	solute carrier family 13 (sodium-dependent dicarboxylate transporter), member 2 [Source:MGI Symbol;Acc:MGI:1276558]	0	0	1	0	1	0	0	0	0	ENSG00000007866	7005	TEAD3	TEA domain transcription factor 3 [Source:HGNC Symbol;Acc:HGNC:11716]	305	349	357	632	350	403	461	665	495	472	422	466	292	339
ENSMUSG00000001098	330171	Kctd10	potassium channel tetramerisation domain containing 10 [Source:MGI Symbol;Acc:MGI:2141207]	796	693	979	732	840	1089	868	968	1058	ENSG00000007908	6401	SELE	selectin E [Source:HGNC Symbol;Acc:HGNC:10718]	1	2	0	1	0	1	0	0	0	2	0	0	0	0
ENSMUSG00000001100	67811	Poldip2	polymerase (DNA-directed), delta interacting protein 2 [Source:MGI Symbol;Acc:MGI:1915061]	758	710	1113	814	768	1042	854	885	1165	ENSG00000007923	55735	DNAJC11	DnaJ heat shock protein family (Hsp40) member C11 [Source:HGNC Symbol;Acc:HGNC:25570]	246	297	176	237	248	292	247	287	191	213	137	183	256	310
ENSMUSG00000001103	18292	Sebox	SEBOX homeobox [Source:MGI Symbol;Acc:MGI:108012]	0	0	8	1	4	0	1	1	1	ENSG00000007933	2328	FMO3	flavin containing dimethylaniline monoxygenase 3 [Source:HGNC Symbol;Acc:HGNC:3771]	0	1	22	23	0	1	1	3	7	0	1	2	1	2
ENSMUSG00000001105	55978	Ift20	intraflagellar transport 20 [Source:MGI Symbol;Acc:MGI:1915585]	104	88	96	84	105	102	89	132	145	ENSG00000007944	29116	MYLIP	myosin regulatory light chain interacting protein [Source:HGNC Symbol;Acc:HGNC:21155]	30	42	113	190	31	29	121	152	100	98	33	29	54	50
ENSMUSG00000001119	12833	Col6a1	collagen, type VI, alpha 1 [Source:MGI Symbol;Acc:MGI:88459]	20	15	26	15	29	21	32	38	30	ENSG00000007952	27035	NOX1	NADPH oxidase 1 [Source:HGNC Symbol;Acc:HGNC:7889]	0	0	0	1	0	0	0	0	0	0	0	0	0	0
ENSMUSG00000001120	59093	Pcbp3	poly(rC) binding protein 3 [Source:MGI Symbol;Acc:MGI:1890470]	214	240	319	247	230	324	334	331	361	ENSG00000007968	1870	E2F2	E2F transcription factor 2 [Source:HGNC Symbol;Acc:HGNC:3114]	144	178	22	41	279	314	226	291	175	167	175	198	101	122
ENSMUSG00000001123	16859	Lgals9	lectin, galactose binding, soluble 9 [Source:MGI Symbol;Acc:MGI:109496]	4	5	2	1	0	2	4	4	0	ENSG00000008018	5689	PSMB1	proteasome subunit beta 1 [Source:HGNC Symbol;Acc:HGNC:9537]	277	305	204	293	263	282	239	319	251	247	199	202	189	202
ENSMUSG00000001127	11836	Araf	Araf proto-oncogene, serine/threonine kinase [Source:MGI Symbol;Acc:MGI:88065]	481	415	546	428	410	498	658	536	507	ENSG00000008056	6853	SYN1	synapsin I [Source:HGNC Symbol;Acc:HGNC:11494]	52	66	13	18	36	33	54	53	100	84	34	36	36	53
ENSMUSG00000001128	18636	Cfp	complement factor properdin [Source:MGI Symbol;Acc:MGI:97545]	32	44	45	44	29	33	63	58	61	ENSG00000008083	3720	JARID2	jumonji and AT-rich interaction domain containing 2 [Source:HGNC Symbol;Acc:HGNC:6196]	375	439	109	163	665	689	535	762	534	570	550	615	665	840
ENSMUSG00000001131	21857	Timp1	tissue inhibitor of metalloproteinase 1 [Source:MGI Symbol;Acc:MGI:98752]	16	10	16	23	9	15	13	19	17	ENSG00000008086	6792	CDKL5	cyclin dependent kinase like 5 [Source:HGNC Symbol;Acc:HGNC:11411]	219	253	182	293	172	203	311	382	316	359	175	160	300	330
ENSMUSG00000001134	22294	Uxt	ubiquitously expressed prefoldin like chaperone [Source:MGI Symbol;Acc:MGI:1277988]	72	57	118	69	86	94	73	86	92	ENSG00000008118	57172	CAMK1G	calcium/calmodulin dependent protein kinase IG [Source:HGNC Symbol;Acc:HGNC:14585]	4	8	20	24	0	0	9	8	37	32	6	8	33	29
ENSMUSG00000001138	94218	Cnnm3	cyclin M3 [Source:MGI Symbol;Acc:MGI:2151055]	493	460	716	521	637	683	660	724	794	ENSG00000008128	728642	CDK11A	cyclin dependent kinase 11A [Source:HGNC Symbol;Acc:HGNC:1730]	76	60	48	95	63	60	76	83	87	100	85	89	128	111
ENSMUSG00000001143	214895	Lman2l	lectin, mannose-binding 2-like [Source:MGI Symbol;Acc:MGI:2443010]	451	457	521	391	384	467	570	461	483	ENSG00000008130	65220	NADK	NAD kinase [Source:HGNC Symbol;Acc:HGNC:29831]	370	429	305	436	366	395	371	478	346	312	292	379	434	561
ENSMUSG00000001150	54387	Mcm3ap	minichromosome maintenance complex component 3 associated protein [Source:MGI Symbol;Acc:MGI:1930089]	1209	1092	1434	1011	1209	1360	1123	1217	1630	ENSG00000008196	7021	TFAP2B	transcription factor AP-2 beta [Source:HGNC Symbol;Acc:HGNC:11743]	2607	2972	101	149	3	2	221	240	187	177	367	430	274	281
ENSMUSG00000001151	18541	Pcnt	pericentrin (kendrin) [Source:MGI Symbol;Acc:MGI:102722]	1690	1473	2021	1545	1717	2039	1863	1902	2305	ENSG00000008197	83741	TFAP2D	transcription factor AP-2 delta [Source:HGNC Symbol;Acc:HGNC:15581]	0	0	0	0	0	0	0	0	0	0	2	0	0	0
ENSMUSG00000001155	14317	Ftcd	formiminotransferase cyclodeaminase [Source:MGI Symbol;Acc:MGI:1339962]	0	0	0	0	3	0	2	1	0	ENSG00000008226	9940	DLEC1	DLEC1 cilia and flagella associated protein [Source:HGNC Symbol;Acc:HGNC:2899]	4	9	2	8	18	22	14	27	24	23	22	16	34	53
ENSMUSG00000001156	17119	Mxd1	MAX dimerization protein 1 [Source:MGI Symbol;Acc:MGI:96908]	165	129	200	99	121	181	139	102	154	ENSG00000008256	9265	CYTH3	cytohesin 3 [Source:HGNC Symbol;Acc:HGNC:9504]	287	291	444	703	258	317	351	451	359	307	241	228	198	216
ENSMUSG00000001157	23885	Gmcl1	germ cell-less, spermatogenesis associated 1 [Source:MGI Symbol;Acc:MGI:1345156]	369	353	436	375	391	508	421	449	514	ENSG00000008277	53616	ADAM22	ADAM metallopeptidase domain 22 [Source:HGNC Symbol;Acc:HGNC:201]	65	83	32	58	206	231	174	242	178	191	163	155	183	189
ENSMUSG00000001158	66618	Snrnp27	small nuclear ribonucleoprotein 27 (U4/U6.U5) [Source:MGI Symbol;Acc:MGI:1913868]	245	230	380	286	300	391	304	381	419	ENSG00000008282	6856	SYPL1	synaptophysin like 1 [Source:HGNC Symbol;Acc:HGNC:11507]	295	313	299	473	195	240	283	389	269	278	206	218	239	245
ENSMUSG00000001166	114643	Oas1c	2'-5' oligoadenylate synthetase 1C [Source:MGI Symbol;Acc:MGI:2149633]	4	4	6	5	1	2	5	4	6	ENSG00000008283	1534	CYB561	cytochrome b561 [Source:HGNC Symbol;Acc:HGNC:2571]	22	48	22	36	32	31	35	41	58	44	24	37	25	36
ENSMUSG00000001168	246729	Oas1h	2'-5' oligoadenylate synthetase 1H [Source:MGI Symbol;Acc:MGI:2180853]	0	0	0	0	0	0	0	0	0	ENSG00000008294	9043	SPAG9	sperm associated antigen 9 [Source:HGNC Symbol;Acc:HGNC:14524]	1281	1569	863	1213	1626	1791	1438	1946	1673	1685	1527	1836	1191	1306
ENSMUSG00000001173	320634	Ocrl	OCRL, inositol polyphosphate-5-phosphatase [Source:MGI Symbol;Acc:MGI:109589]	497	458	644	457	478	585	617	593	626	ENSG00000008300	1951	CELSR3	cadherin EGF LAG seven-pass G-type receptor 3 [Source:HGNC Symbol;Acc:HGNC:3230]	443	493	48	79	667	661	505	789	736	731	546	615	647	709
ENSMUSG00000001175	1231312314	Calm1	calmodulin 1 [Source:MGI Symbol;Acc:MGI:88251]	4173	3714	5369	3897	4617	5568	4019	5030	5492	ENSG00000008311	10157	AASS	aminoadipate-semialdehyde synthase [Source:HGNC Symbol;Acc:HGNC:17366]	309	379	304	542	743	807	616	803	584	595	502	550	635	764
ENSMUSG00000001211	28169	Agpat3	1-acylglycerol-3-phosphate O-acyltransferase 3 [Source:MGI Symbol;Acc:MGI:1336186]	495	508	724	497	528	658	477	533	589	ENSG00000008323	55200	PLEKHG6	pleckstrin homology and RhoGEF domain containing G6 [Source:HGNC Symbol;Acc:HGNC:25562]	2	4	6	11	2	6	11	10	5	5	3	6	9	8
ENSMUSG00000001225	13487	Slc26a3	solute carrier family 26, member 3 [Source:MGI Symbol;Acc:MGI:107181]	2	5	0	0	1	0	0	2	0	ENSG00000008324	51188	SS18L2	SS18 like 2 [Source:HGNC Symbol;Acc:HGNC:15593]	43	38	27	27	41	40	29	48	32	37	40	35	40	42
ENSMUSG00000001227	20359	Sema6b	sema domain, transmembrane domain (TM), and cytoplasmic domain, (semaphorin) 6B [Source:MGI Symbol;Acc:MGI:1202889]	58	38	90	37	44	60	175	70	102	ENSG00000008382	84954	MPND	MPN domain containing [Source:HGNC Symbol;Acc:HGNC:25934]	44	33	9	18	61	50	56	72	54	55	31	39	55	61
ENSMUSG00000001228	18140	Uhrf1	ubiquitin-like, containing PHD and RING finger domains, 1 [Source:MGI Symbol;Acc:MGI:1338889]	5974	5298	7403	5689	6277	7886	5853	6918	7779	ENSG00000008394	4257	MGST1	microsomal glutathione S-transferase 1 [Source:HGNC Symbol;Acc:HGNC:7061]	142	127	765	1194	106	134	181	236	213	194	157	169	322	341
ENSMUSG00000001229	224897	Dpp9	dipeptidylpeptidase 9 [Source:MGI Symbol;Acc:MGI:2443967]	919	804	1204	872	1056	1086	679	962	1103	ENSG00000008405	1407	CRY1	cryptochrome circadian regulator 1 [Source:HGNC Symbol;Acc:HGNC:2384]	119	149	174	239	140	149	157	210	149	149	98	119	123	139
ENSMUSG00000001240	54409	Ramp2	receptor (calcitonin) activity modifying protein 2 [Source:MGI Symbol;Acc:MGI:1859650]	70	78	98	51	60	100	107	121	130	ENSG00000008438	8993	PGLYRP1	peptidoglycan recognition protein 1 [Source:HGNC Symbol;Acc:HGNC:8904]	0	0	0	0	0	0	0	0	0	0	1	0	0	1
ENSMUSG00000001247	54135	Lsr	lipolysis stimulated lipoprotein receptor [Source:MGI Symbol;Acc:MGI:1927471]	261	250	400	303	357	453	378	292	435	ENSG00000008441	4784	NFIX	nuclear factor I X [Source:HGNC Symbol;Acc:HGNC:7788]	83	107	1662	2763	19	22	113	136	93	103	42	40	13	21
ENSMUSG00000001248	52857	Gramd1a	GRAM domain containing 1A [Source:MGI Symbol;Acc:MGI:105490]	658	609	636	479	539	660	664	672	612	ENSG00000008513	6482	ST3GAL1	ST3 beta-galactoside alpha-2,3-sialyltransferase 1 [Source:HGNC Symbol;Acc:HGNC:10862]	172	201	209	308	5	5	88	107	102	112	36	50	45	43
ENSMUSG00000001249	15451	Hpn	hepsin [Source:MGI Symbol;Acc:MGI:1196620]	17	12	29	11	26	18	49	35	34	ENSG00000008516	64386	MMP25	matrix metallopeptidase 25 [Source:HGNC Symbol;Acc:HGNC:14246]	58	67	7	16	4	3	43	67	28	22	4	2	7	20
ENSMUSG00000001260	14405	Gabrg1	gamma-aminobutyric acid (GABA) A receptor, subunit gamma 1 [Source:MGI Symbol;Acc:MGI:103156]	0	5	1	4	8	1	4	12	1	ENSG00000008517	9235	IL32	interleukin 32 [Source:HGNC Symbol;Acc:HGNC:16830]	6	5	117	230	3	4	55	77	6	18	5	4	3	3
ENSMUSG00000001270	12709	Ckb	creatine kinase, brain [Source:MGI Symbol;Acc:MGI:88407]	991	1026	1028	421	381	960	620	610	571	ENSG00000008710	5310	PKD1	polycystin 1, transient receptor potential channel interacting [Source:HGNC Symbol;Acc:HGNC:9008]	849	1056	886	1266	773	740	910	1344	950	959	710	840	760	906
ENSMUSG00000001280	20683	Sp1	trans-acting transcription factor 1 [Source:MGI Symbol;Acc:MGI:98372]	2726	2342	3416	2433	2905	3139	3395	3293	3808	ENSG00000008735	23542	MAPK8IP2	mitogen-activated protein kinase 8 interacting protein 2 [Source:HGNC Symbol;Acc:HGNC:6883]	123	129	7	5	104	99	70	96	112	111	102	89	59	58
ENSMUSG00000001281	16421	Itgb7	integrin beta 7 [Source:MGI Symbol;Acc:MGI:96616]	1	6	0	1	8	5	1	13	2	ENSG00000008838	9862	MED24	mediator complex subunit 24 [Source:HGNC Symbol;Acc:HGNC:22963]	373	417	230	357	439	491	459	587	435	406	314	397	429	484
ENSMUSG00000001285	60315	Myg1	melanocyte proliferating gene 1 [Source:MGI Symbol;Acc:MGI:1929864]	348	246	389	320	372	356	277	387	462	ENSG00000008853	23221	RHOBTB2	Rho related BTB domain containing 2 [Source:HGNC Symbol;Acc:HGNC:18756]	325	369	165	279	422	444	404	589	323	316	209	261	192	221
ENSMUSG00000001288	19411	Rarg	retinoic acid receptor, gamma [Source:MGI Symbol;Acc:MGI:97858]	548	476	617	477	477	687	766	700	796	ENSG00000008869	54497	HEATR5B	HEAT repeat containing 5B [Source:HGNC Symbol;Acc:HGNC:29273]	324	348	222	382	296	337	311	397	319	330	211	296	286	339
ENSMUSG00000001289	56612	Pfdn5	prefoldin 5 [Source:MGI Symbol;Acc:MGI:1928753]	753	677	1061	703	829	1171	891	1049	1303	ENSG00000008952	7095	SEC62	SEC62 homolog, preprotein translocation factor [Source:HGNC Symbol;Acc:HGNC:11846]	253	323	365	576	355	361	323	479	387	335	244	306	266	283
ENSMUSG00000001300	13642	Efnb2	ephrin B2 [Source:MGI Symbol;Acc:MGI:105097]	1881	1726	2292	1481	1681	2274	1936	2114	2290	ENSG00000008988	6224	RPS20	ribosomal protein S20 [Source:HGNC Symbol;Acc:HGNC:10405]	982	1109	1022	1447	1104	1407	1397	1921	1141	1091	1161	1393	1057	1167
ENSMUSG00000001305	67223	Rrp15	ribosomal RNA processing 15 homolog (S. cerevisiae) [Source:MGI Symbol;Acc:MGI:1914473]	346	252	438	358	378	425	264	384	539	ENSG00000009307	7812	CSDE1	cold shock domain containing E1 [Source:HGNC Symbol;Acc:HGNC:29905]	2390	2703	1813	2810	2551	2795	3263	3855	2947	2933	2311	2820	3721	4226
ENSMUSG00000001313	11858	Rnd2	Rho family GTPase 2 [Source:MGI Symbol;Acc:MGI:1338755]	101	77	94	77	63	87	73	92	91	ENSG00000009335	9690	UBE3C	ubiquitin protein ligase E3C [Source:HGNC Symbol;Acc:HGNC:16803]	410	467	461	762	451	475	498	630	512	480	350	428	449	471
ENSMUSG00000001323	27364	Srr	serine racemase [Source:MGI Symbol;Acc:MGI:1351636]	193	159	177	119	142	164	256	221	192	ENSG00000009413	5980	REV3L	REV3 like, DNA directed polymerase zeta catalytic subunit [Source:HGNC Symbol;Acc:HGNC:9968]	1746	2112	489	746	1129	1236	958	1198	1162	1027	838	918	504	584
ENSMUSG00000001333	68828	Sync	syncoilin [Source:MGI Symbol;Acc:MGI:1916078]	14	14	20	8	19	10	22	31	16	ENSG00000009694	10178	TENM1	teneurin transmembrane protein 1 [Source:HGNC Symbol;Acc:HGNC:8117]	594	729	158	249	386	423	91	145	272	250	220	223	70	86
ENSMUSG00000001334	384061	Fndc5	fibronectin type III domain containing 5 [Source:MGI Symbol;Acc:MGI:1917614]	20	16	20	12	23	21	32	11	14	ENSG00000009709	5081	PAX7	paired box 7 [Source:HGNC Symbol;Acc:HGNC:8621]	10	12	0	3	0	2	179	295	45	68	36	54	186	208
ENSMUSG00000001348	11433	Acp5	acid phosphatase 5, tartrate resistant [Source:MGI Symbol;Acc:MGI:87883]	75	47	55	42	43	67	21	32	42	ENSG00000009724	10747	MASP2	mannan binding lectin serine peptidase 2 [Source:HGNC Symbol;Acc:HGNC:6902]	52	58	21	28	80	91	87	98	64	74	72	69	107	149
ENSMUSG00000001349	12797	Cnn1	calponin 1 [Source:MGI Symbol;Acc:MGI:104979]	8	16	11	5	8	3	5	5	3	ENSG00000009765	389434	IYD	iodotyrosine deiodinase [Source:HGNC Symbol;Acc:HGNC:21071]	1	5	3	3	1	6	4	1	5	11	9	1	1	0
ENSMUSG00000001366	71538	Fbxo9	f-box protein 9 [Source:MGI Symbol;Acc:MGI:1918788]	144	116	184	162	158	230	143	166	174	ENSG00000009780	199870	FAM76A	family with sequence similarity 76 member A [Source:HGNC Symbol;Acc:HGNC:28530]	44	53	23	36	33	47	64	60	38	59	17	27	51	89
ENSMUSG00000001376	73288	Vps50	VPS50 EARP/GARPII complex subunit [Source:MGI Symbol;Acc:MGI:1920538]	420	422	466	425	465	506	412	470	577	ENSG00000009790	80342	TRAF3IP3	TRAF3 interacting protein 3 [Source:HGNC Symbol;Acc:HGNC:30766]	3	8	2	0	4	1	8	7	10	11	2	8	9	7
ENSMUSG00000001380	15115	Hars	histidyl-tRNA synthetase [Source:MGI Symbol;Acc:MGI:108087]	619	555	905	587	781	874	720	831	973	ENSG00000009830	29954	POMT2	protein O-mannosyltransferase 2 [Source:HGNC Symbol;Acc:HGNC:19743]	319	359	216	274	300	286	302	414	270	266	170	213	157	206
ENSMUSG00000001383	66492	Zmat2	zinc finger, matrin type 2 [Source:MGI Symbol;Acc:MGI:1913742]	549	473	793	597	665	768	598	690	738	ENSG00000009844	51534	VTA1	vesicle trafficking 1 [Source:HGNC Symbol;Acc:HGNC:20954]	315	323	234	364	401	383	355	524	334	345	265	300	233	265
ENSMUSG00000001403	68612	Ube2c	ubiquitin-conjugating enzyme E2C [Source:MGI Symbol;Acc:MGI:1915862]	1432	1286	2073	1309	1540	1941	1401	1764	2039	ENSG00000009950	51085	MLXIPL	MLX interacting protein like [Source:HGNC Symbol;Acc:HGNC:12744]	5	5	0	1	0	3	3	1	3	1	0	1	3	8
ENSMUSG00000001415	229512	Smg5	Smg-5 homolog, nonsense mediated mRNA decay factor (C. elegans) [Source:MGI Symbol;Acc:MGI:2447364]	1459	1281	1802	1315	1542	1784	1102	1382	1578	ENSG00000009954	9031	BAZ1B	bromodomain adjacent to zinc finger domain 1B [Source:HGNC Symbol;Acc:HGNC:961]	1107	1340	600	884	1419	1494	1299	1630	1229	1210	913	1092	869	965
ENSMUSG00000001416	12462	Cct3	chaperonin containing Tcp1, subunit 3 (gamma) [Source:MGI Symbol;Acc:MGI:104708]	4108	3633	5887	4483	5003	5802	4167	5236	6378	ENSG00000010017	10048	RANBP9	RAN binding protein 9 [Source:HGNC Symbol;Acc:HGNC:13727]	272	346	269	425	510	511	353	467	410	376	322	358	315	337
ENSMUSG00000001418	56700	Glmp	glycosylated lysosomal membrane protein [Source:MGI Symbol;Acc:MGI:1913318]	191	166	307	183	207	262	276	288	335	ENSG00000010030	51513	ETV7	ETS variant 7 [Source:HGNC Symbol;Acc:HGNC:18160]	1	0	0	1	0	0	1	1	2	2	0	1	0	0
ENSMUSG00000001419	17261	Mef2d	myocyte enhancer factor 2D [Source:MGI Symbol;Acc:MGI:99533]	412	332	471	336	353	486	722	560	484	ENSG00000010072	83932	SPRTN	SprT-like N-terminal domain [Source:HGNC Symbol;Acc:HGNC:25356]	57	83	51	93	102	108	80	115	77	83	82	91	97	117
ENSMUSG00000001420	71913	Tmem79	transmembrane protein 79 [Source:MGI Symbol;Acc:MGI:1919163]	12	16	22	10	7	18	15	12	15	ENSG00000010165	51603	EEF1AKNMT	eEF1A lysine and N-terminal methyltransferase [Source:HGNC Symbol;Acc:HGNC:24248]	102	121	58	89	115	130	136	169	103	83	72	98	130	123
ENSMUSG00000001424	56463	Snd1	staphylococcal nuclease and tudor domain containing 1 [Source:MGI Symbol;Acc:MGI:1929266]	1730	1488	2098	1657	1728	2092	2240	2286	2515	ENSG00000010219	8798	DYRK4	dual specificity tyrosine phosphorylation regulated kinase 4 [Source:HGNC Symbol;Acc:HGNC:3095]	37	39	35	52	41	52	35	35	50	38	38	38	32	35
ENSMUSG00000001435	12822	Col18a1	collagen, type XVIII, alpha 1 [Source:MGI Symbol;Acc:MGI:88451]	2592	2165	3543	2690	2879	3368	3875	3595	4497	ENSG00000010244	7756	ZNF207	zinc finger protein 207 [Source:HGNC Symbol;Acc:HGNC:12998]	1592	1915	1160	1984	2353	2511	2394	3376	2167	2031	2034	2231	2034	2297
ENSMUSG00000001436	20509	Slc19a1	solute carrier family 19 (folate transporter), member 1 [Source:MGI Symbol;Acc:MGI:103182]	257	249	319	294	334	346	373	340	380	ENSG00000010256	7384	UQCRC1	ubiquinol-cytochrome c reductase core protein 1 [Source:HGNC Symbol;Acc:HGNC:12585]	357	483	242	348	485	543	492	746	384	397	355	383	328	353
ENSMUSG00000001440	16211	Kpnb1	karyopherin (importin) beta 1 [Source:MGI Symbol;Acc:MGI:107532]	15918	13892	21042	15530	17650	20542	15896	18386	20501	ENSG00000010270	83930	STARD3NL	STARD3 N-terminal like [Source:HGNC Symbol;Acc:HGNC:19169]	298	346	205	299	340	344	350	460	339	286	289	253	224	234
ENSMUSG00000001441	19155	Npepps	aminopeptidase puromycin sensitive [Source:MGI Symbol;Acc:MGI:1101358]	1613	1352	2100	1368	1554	1989	2258	2066	2188	ENSG00000010278	928	CD9	CD9 molecule [Source:HGNC Symbol;Acc:HGNC:1709]	36	34	19	46	1	0	45	37	21	18	5	3	6	16
ENSMUSG00000001444	57765	Tbx21	T-box 21 [Source:MGI Symbol;Acc:MGI:1888984]	7	4	2	1	1	8	0	4	0	ENSG00000010282	57467	HHATL	hedgehog acyltransferase like [Source:HGNC Symbol;Acc:HGNC:13242]	1	0	0	1	0	0	1	1	0	0	0	0	0	0
ENSMUSG00000001445	107732	Mrpl10	mitochondrial ribosomal protein L10 [Source:MGI Symbol;Acc:MGI:1333801]	268	298	408	319	343	444	331	382	444	ENSG00000010292	9918	NCAPD2	non-SMC condensin I complex subunit D2 [Source:HGNC Symbol;Acc:HGNC:24305]	674	901	393	689	1111	1167	1126	1544	1006	1080	912	1093	1093	1281
ENSMUSG00000001467	13121	Cyp51	cytochrome P450, family 51 [Source:MGI Symbol;Acc:MGI:106040]	1959	1577	2091	1415	1849	2464	2269	2060	2075	ENSG00000010295	25900	IFFO1	intermediate filament family orphan 1 [Source:HGNC Symbol;Acc:HGNC:24970]	81	70	73	140	93	86	96	111	95	82	93	83	89	92
ENSMUSG00000001472	66855	Tcf25	transcription factor 25 (basic helix-loop-helix) [Source:MGI Symbol;Acc:MGI:1914105]	1392	1175	1809	1241	1414	1681	2142	1782	2157	ENSG00000010310	2696	GIPR	gastric inhibitory polypeptide receptor [Source:HGNC Symbol;Acc:HGNC:4271]	10	6	4	4	10	6	13	1	10	13	7	7	12	15
ENSMUSG00000001473	67951	Tubb6	tubulin, beta 6 class V [Source:MGI Symbol;Acc:MGI:1915201]	521	383	644	442	543	657	661	676	781	ENSG00000010318	51533	PHF7	PHD finger protein 7 [Source:HGNC Symbol;Acc:HGNC:18458]	18	15	11	13	15	16	17	13	15	16	10	13	23	24
ENSMUSG00000001482	23854	Def8	differentially expressed in FDCP 8 [Source:MGI Symbol;Acc:MGI:1346331]	442	370	640	397	400	544	373	431	539	ENSG00000010319	56920	SEMA3G	semaphorin 3G [Source:HGNC Symbol;Acc:HGNC:30400]	1	2	0	1	0	1	10	12	4	2	5	2	3	3
ENSMUSG00000001493	17285	Meox1	mesenchyme homeobox 1 [Source:MGI Symbol;Acc:MGI:103220]	13	24	25	28	11	24	28	24	28	ENSG00000010322	11188	NISCH	nischarin [Source:HGNC Symbol;Acc:HGNC:18006]	980	1158	1034	1795	1220	1317	1175	1735	1413	1301	1115	1324	1421	1688
ENSMUSG00000001494	74499	Sost	sclerostin [Source:MGI Symbol;Acc:MGI:1921749]	4	2	12	8	12	7	4	11	2	ENSG00000010327	23166	STAB1	stabilin 1 [Source:HGNC Symbol;Acc:HGNC:18628]	0	1	1	3	0	0	1	0	1	3	2	1	0	1
ENSMUSG00000001496	21869	Nkx2-1	NK2 homeobox 1 [Source:MGI Symbol;Acc:MGI:108067]	504	465	635	382	349	581	329	414	232	ENSG00000010361	80199	FUZ	fuzzy planar cell polarity protein [Source:HGNC Symbol;Acc:HGNC:26219]	28	43	18	33	59	57	44	68	39	38	37	31	36	39
ENSMUSG00000001497	18511	Pax9	paired box 9 [Source:MGI Symbol;Acc:MGI:97493]	32	37	10	9	19	18	38	45	37	ENSG00000010379	6540	SLC6A13	solute carrier family 6 member 13 [Source:HGNC Symbol;Acc:HGNC:11046]	1	2	0	1	1	0	1	1	4	3	1	1	1	1
ENSMUSG00000001504	16372	Irx2	Iroquois homeobox 2 [Source:MGI Symbol;Acc:MGI:1197526]	23	19	48	33	43	43	48	29	60	ENSG00000010404	3423	IDS	iduronate 2-sulfatase [Source:HGNC Symbol;Acc:HGNC:5389]	607	662	559	777	1211	1253	1388	1930	970	976	634	774	715	769
ENSMUSG00000001506	12842	Col1a1	collagen, type I, alpha 1 [Source:MGI Symbol;Acc:MGI:88467]	679	485	543	359	1201	429	783	599	486	ENSG00000010438	5646	PRSS3	serine protease 3 [Source:HGNC Symbol;Acc:HGNC:9486]	0	1	2	3	0	0	1	5	0	1	0	1	1	0
ENSMUSG00000001507	16400	Itga3	integrin alpha 3 [Source:MGI Symbol;Acc:MGI:96602]	432	346	577	454	496	581	756	602	662	ENSG00000010539	7752	ZNF200	zinc finger protein 200 [Source:HGNC Symbol;Acc:HGNC:12993]	98	100	53	47	118	92	88	133	83	79	65	68	36	55
ENSMUSG00000001508	20391	Sgca	sarcoglycan, alpha (dystrophin-associated glycoprotein) [Source:MGI Symbol;Acc:MGI:894698]	0	0	1	0	0	1	0	0	0	ENSG00000010610	920	CD4	CD4 molecule [Source:HGNC Symbol;Acc:HGNC:1678]	43	57	6	7	3	8	14	19	47	33	10	11	35	41
ENSMUSG00000001510	13393	Dlx3	distal-less homeobox 3 [Source:MGI Symbol;Acc:MGI:94903]	128	76	178	135	148	183	340	310	276	ENSG00000010626	10233	LRRC23	leucine rich repeat containing 23 [Source:HGNC Symbol;Acc:HGNC:19138]	15	11	8	17	5	14	16	6	13	12	7	4	15	9
ENSMUSG00000001517	14235	Foxm1	forkhead box M1 [Source:MGI Symbol;Acc:MGI:1347487]	1827	1609	2195	1548	1710	2158	1596	1915	2158	ENSG00000010671	695	BTK	Bruton tyrosine kinase [Source:HGNC Symbol;Acc:HGNC:1133]	0	0	0	0	0	1	0	2	1	0	1	1	2	1
ENSMUSG00000001518	101142	Itfg2	integrin alpha FG-GAP repeat containing 2 [Source:MGI Symbol;Acc:MGI:1915450]	252	264	333	239	295	322	323	312	386	ENSG00000010704	3077	HFE	homeostatic iron regulator [Source:HGNC Symbol;Acc:HGNC:4886]	4	10	21	33	2	1	38	40	11	1	39	41	8	6
ENSMUSG00000001520	60345	Nrip2	nuclear receptor interacting protein 2 [Source:MGI Symbol;Acc:MGI:1891884]	39	41	51	26	45	39	19	37	45	ENSG00000010803	22955	SCMH1	Scm polycomb group protein homolog 1 [Source:HGNC Symbol;Acc:HGNC:19003]	321	313	301	468	507	499	335	427	334	334	322	421	394	426
ENSMUSG00000001521	22158	Tulp3	tubby-like protein 3 [Source:MGI Symbol;Acc:MGI:1329045]	635	548	823	627	708	873	942	863	928	ENSG00000010810	2534	FYN	FYN proto-oncogene, Src family tyrosine kinase [Source:HGNC Symbol;Acc:HGNC:4037]	756	940	167	276	1375	1485	804	1047	853	794	697	875	459	529
ENSMUSG00000001524	14885	Gtf2h4	general transcription factor II H, polypeptide 4 [Source:MGI Symbol;Acc:MGI:1338799]	319	282	407	334	321	390	360	403	455	ENSG00000010818	3097	HIVEP2	human immunodeficiency virus type I enhancer binding protein 2 [Source:HGNC Symbol;Acc:HGNC:4921]	83	96	391	601	233	268	238	292	277	276	211	262	189	250
ENSMUSG00000001525	22154	Tubb5	tubulin, beta 5 class I [Source:MGI Symbol;Acc:MGI:107812]	30336	25864	38582	27914	30915	39467	32618	35565	41741	ENSG00000010932	2326	FMO1	flavin containing dimethylaniline monoxygenase 1 [Source:HGNC Symbol;Acc:HGNC:3769]	4	7	25	34	2	7	2	1	13	18	1	12	4	6
ENSMUSG00000001542	192657	Ell2	elongation factor RNA polymerase II 2 [Source:MGI Symbol;Acc:MGI:2183438]	233	209	235	204	244	282	161	204	276	ENSG00000011007	6924	ELOA	elongin A [Source:HGNC Symbol;Acc:HGNC:11620]	365	516	236	376	456	483	387	470	417	436	339	367	482	570
ENSMUSG00000001552	16480	Jup	junction plakoglobin [Source:MGI Symbol;Acc:MGI:96650]	311	264	360	275	324	441	392	416	479	ENSG00000011009	11313	LYPLA2	lysophospholipase 2 [Source:HGNC Symbol;Acc:HGNC:6738]	147	146	124	248	161	215	172	242	208	172	152	164	261	303
ENSMUSG00000001555	14230	Fkbp10	FK506 binding protein 10 [Source:MGI Symbol;Acc:MGI:104769]	229	191	286	208	227	298	300	293	327	ENSG00000011021	1185	CLCN6	chloride voltage-gated channel 6 [Source:HGNC Symbol;Acc:HGNC:2024]	380	448	258	345	646	589	465	599	497	510	417	467	558	639
ENSMUSG00000001558	66720	Klhl10	kelch-like 10 [Source:MGI Symbol;Acc:MGI:2181067]	8	8	5	10	11	9	12	7	6	ENSG00000011028	9902	MRC2	mannose receptor C type 2 [Source:HGNC Symbol;Acc:HGNC:16875]	590	754	2440	3922	1053	1003	733	896	1034	996	830	999	490	622
ENSMUSG00000001566	15285	Mnx1	motor neuron and pancreas homeobox 1 [Source:MGI Symbol;Acc:MGI:109160]	0	0	0	2	6	0	1	8	3	ENSG00000011052	654364	NME1-NME2	NME1-NME2 readthrough [Source:HGNC Symbol;Acc:HGNC:33531]	0	16	0	21	20	21	19	16	28	0	22	17	12	36
ENSMUSG00000001569	433864	Nom1	nucleolar protein with MIF4G domain 1 [Source:MGI Symbol;Acc:MGI:1861749]	625	520	768	605	711	809	517	691	726	ENSG00000011083	6534	SLC6A7	solute carrier family 6 member 7 [Source:HGNC Symbol;Acc:HGNC:11054]	2	1	0	1	2	1	0	3	3	1	3	0	0	0
ENSMUSG00000001576	67458	Ergic1	endoplasmic reticulum-golgi intermediate compartment (ERGIC) 1 [Source:MGI Symbol;Acc:MGI:1914708]	1445	1298	1977	1460	1585	2060	1742	1865	2107	ENSG00000011105	10867	TSPAN9	tetraspanin 9 [Source:HGNC Symbol;Acc:HGNC:21640]	168	155	500	797	146	126	455	616	201	225	124	139	96	99
ENSMUSG00000001583	83813	Tnk1	tyrosine kinase, non-receptor, 1 [Source:MGI Symbol;Acc:MGI:1930958]	34	41	44	44	57	52	67	93	60	ENSG00000011114	55727	BTBD7	BTB domain containing 7 [Source:HGNC Symbol;Acc:HGNC:18269]	471	607	531	908	432	495	546	776	551	613	406	396	515	597
ENSMUSG00000001588	216859	Acap1	ArfGAP with coiled-coil, ankyrin repeat and PH domains 1 [Source:MGI Symbol;Acc:MGI:2388270]	4	10	10	2	8	1	15	3	4	ENSG00000011132	9546	APBA3	amyloid beta precursor protein binding family A member 3 [Source:HGNC Symbol;Acc:HGNC:580]	59	74	56	101	65	66	59	69	68	76	44	60	65	81
ENSMUSG00000001604	21401	Tcea3	transcription elongation factor A (SII), 3 [Source:MGI Symbol;Acc:MGI:1196908]	7	3	7	3	9	11	4	9	7	ENSG00000011143	54903	MKS1	MKS transition zone complex subunit 1 [Source:HGNC Symbol;Acc:HGNC:7121]	49	62	26	49	74	72	76	96	55	59	60	61	56	65
ENSMUSG00000001622	12994	Csn3	casein kappa [Source:MGI Symbol;Acc:MGI:107461]	20	16	22	22	26	22	38	27	60	ENSG00000011198	51099	ABHD5	abhydrolase domain containing 5 [Source:HGNC Symbol;Acc:HGNC:21396]	57	79	62	85	88	85	84	97	86	89	48	42	55	68
ENSMUSG00000001627	15982	Ifrd1	interferon-related developmental regulator 1 [Source:MGI Symbol;Acc:MGI:1316717]	302	346	457	407	387	433	518	469	579	ENSG00000011201	3730	ANOS1	anosmin 1 [Source:HGNC Symbol;Acc:HGNC:6211]	46	72	217	296	19	25	365	501	308	286	301	322	454	580
ENSMUSG00000001630	232533	Stk38l	serine/threonine kinase 38 like [Source:MGI Symbol;Acc:MGI:1922250]	376	356	456	330	386	471	339	464	435	ENSG00000011243	26993	AKAP8L	A-kinase anchoring protein 8 like [Source:HGNC Symbol;Acc:HGNC:29857]	255	292	227	335	368	368	320	518	493	466	461	488	489	506
ENSMUSG00000001632	78783	Brpf1	bromodomain and PHD finger containing, 1 [Source:MGI Symbol;Acc:MGI:1926033]	733	665	896	640	787	875	615	709	804	ENSG00000011258	54799	MBTD1	mbt domain containing 1 [Source:HGNC Symbol;Acc:HGNC:19866]	177	225	132	190	293	346	315	389	363	365	369	407	400	437
ENSMUSG00000001642	11677	Akr1b3	aldo-keto reductase family 1, member B3 (aldose reductase) [Source:MGI Symbol;Acc:MGI:1353494]	825	797	1265	976	1108	1300	909	1070	1296	ENSG00000011260	51096	UTP18	UTP18 small subunit processome component [Source:HGNC Symbol;Acc:HGNC:24274]	116	113	27	72	108	118	141	161	75	106	76	62	88	93
ENSMUSG00000001655	15422	Hoxc13	homeobox C13 [Source:MGI Symbol;Acc:MGI:99560]	0	5	0	0	2	0	1	9	0	ENSG00000011275	54476	RNF216	ring finger protein 216 [Source:HGNC Symbol;Acc:HGNC:21698]	417	459	417	585	469	506	458	617	491	391	329	409	322	407
ENSMUSG00000001656	109663	Hoxc11	homeobox C11 [Source:MGI Symbol;Acc:MGI:96193]	0	3	0	0	4	0	0	5	0	ENSG00000011295	54902	TTC19	tetratricopeptide repeat domain 19 [Source:HGNC Symbol;Acc:HGNC:26006]	231	317	155	254	299	369	324	435	367	331	309	337	311	375
ENSMUSG00000001657	15426	Hoxc8	homeobox C8 [Source:MGI Symbol;Acc:MGI:96198]	0	0	1	1	4	0	0	5	0	ENSG00000011304	5725	PTBP1	polypyrimidine tract binding protein 1 [Source:HGNC Symbol;Acc:HGNC:9583]	1578	1807	893	1510	1921	1909	1745	2505	1314	1284	1233	1386	1114	1275
ENSMUSG00000001661	15425	Hoxc6	homeobox C6 [Source:MGI Symbol;Acc:MGI:96197]	0	3	0	1	4	0	0	2	0	ENSG00000011332	8193	DPF1	double PHD fingers 1 [Source:HGNC Symbol;Acc:HGNC:20225]	112	135	16	19	170	202	102	178	86	99	82	87	53	45
ENSMUSG00000001663	14871	Gstt1	glutathione S-transferase, theta 1 [Source:MGI Symbol;Acc:MGI:107379]	6	6	6	5	2	4	10	7	5	ENSG00000011347	9066	SYT7	synaptotagmin 7 [Source:HGNC Symbol;Acc:HGNC:11514]	46	53	11	23	38	26	105	154	91	93	38	52	91	84
ENSMUSG00000001665	103140	Gstt3	glutathione S-transferase, theta 3 [Source:MGI Symbol;Acc:MGI:2143526]	20	12	21	5	11	17	15	14	26	ENSG00000011376	23395	LARS2	leucyl-tRNA synthetase 2, mitochondrial [Source:HGNC Symbol;Acc:HGNC:17095]	213	228	116	193	360	342	261	346	224	215	194	198	211	201
ENSMUSG00000001666	13202	Ddt	D-dopachrome tautomerase [Source:MGI Symbol;Acc:MGI:1298381]	182	178	278	176	187	274	225	253	301	ENSG00000011405	5286	PIK3C2A	phosphatidylinositol-4-phosphate 3-kinase catalytic subunit type 2 alpha [Source:HGNC Symbol;Acc:HGNC:8971]	1080	1254	884	1419	1358	1452	1117	1473	1266	1176	1007	1108	1197	1444
ENSMUSG00000001670	234724	Tat	tyrosine aminotransferase [Source:MGI Symbol;Acc:MGI:98487]	0	0	0	0	0	0	0	0	0	ENSG00000011422	5329	PLAUR	plasminogen activator, urokinase receptor [Source:HGNC Symbol;Acc:HGNC:9053]	82	86	148	220	59	76	51	80	92	92	28	46	51	54
ENSMUSG00000001672	73608	Marveld3	MARVEL (membrane-associating) domain containing 3 [Source:MGI Symbol;Acc:MGI:1920858]	5	16	12	16	15	30	20	23	16	ENSG00000011426	54443	ANLN	anillin actin binding protein [Source:HGNC Symbol;Acc:HGNC:14082]	697	753	377	535	547	603	625	874	588	609	436	463	499	540
ENSMUSG00000001674	66942	Ddx18	DEAD (Asp-Glu-Ala-Asp) box polypeptide 18 [Source:MGI Symbol;Acc:MGI:1914192]	1138	938	1594	1209	1458	1637	1251	1520	2011	ENSG00000011451	58525	WIZ	WIZ zinc finger [Source:HGNC Symbol;Acc:HGNC:30917]	613	658	553	803	1087	1121	950	1472	925	843	759	920	593	625
ENSMUSG00000001687	24109	Ubl3	ubiquitin-like 3 [Source:MGI Symbol;Acc:MGI:1344373]	472	386	585	460	400	613	427	500	626	ENSG00000011454	284423637	RABGAP1	RAB GTPase activating protein 1 [Source:HGNC Symbol;Acc:HGNC:17155]	406	582	341	494	610	661	558	710	569	597	474	535	461	556
ENSMUSG00000001700	107022	Gramd3	GRAM domain containing 3 [Source:MGI Symbol;Acc:MGI:1914815]	150	126	248	145	175	209	196	209	191	ENSG00000011465	1634	DCN	decorin [Source:HGNC Symbol;Acc:HGNC:2705]	147	189	3506	5577	3	2	3138	4362	667	714	92	108	109	131
ENSMUSG00000001707	66143	Eef1e1	eukaryotic translation elongation factor 1 epsilon 1 [Source:MGI Symbol;Acc:MGI:1913393]	375	347	585	424	484	610	552	533	653	ENSG00000011478	54814	QPCTL	glutaminyl-peptide cyclotransferase like [Source:HGNC Symbol;Acc:HGNC:25952]	34	39	20	30	26	35	44	55	33	36	20	33	37	34
ENSMUSG00000001729	11651	Akt1	thymoma viral proto-oncogene 1 [Source:MGI Symbol;Acc:MGI:87986]	1988	1967	2741	1865	1990	2577	1560	2198	2621	ENSG00000011485	5536	PPP5C	protein phosphatase 5 catalytic subunit [Source:HGNC Symbol;Acc:HGNC:9322]	358	384	199	326	376	370	344	509	335	307	249	303	269	294
ENSMUSG00000001739	60363	Cldn15	claudin 15 [Source:MGI Symbol;Acc:MGI:1913103]	8	2	3	5	5	10	3	8	3	ENSG00000011523	23177	CEP68	centrosomal protein 68 [Source:HGNC Symbol;Acc:HGNC:29076]	329	362	189	304	514	571	474	683	457	496	461	465	539	527
ENSMUSG00000001741	16170	Il16	interleukin 16 [Source:MGI Symbol;Acc:MGI:1270855]	11	11	11	1	7	17	21	17	21	ENSG00000011566	8491	MAP4K3	mitogen-activated protein kinase kinase kinase kinase 3 [Source:HGNC Symbol;Acc:HGNC:6865]	646	751	534	782	391	434	414	611	517	524	365	445	351	381
ENSMUSG00000001750	27060	Tcirg1	T cell, immune regulator 1, ATPase, H+ transporting, lysosomal V0 protein A3 [Source:MGI Symbol;Acc:MGI:1350931]	78	53	99	50	67	65	105	116	60	ENSG00000011590	27033	ZBTB32	zinc finger and BTB domain containing 32 [Source:HGNC Symbol;Acc:HGNC:16763]	17	7	6	13	20	29	10	18	10	7	11	15	13	11
ENSMUSG00000001751	27419	Naglu	alpha-N-acetylglucosaminidase (Sanfilippo disease IIIB) [Source:MGI Symbol;Acc:MGI:1351641]	59	75	66	73	65	82	168	108	90	ENSG00000011600	7305	TYROBP	TYRO protein tyrosine kinase binding protein [Source:HGNC Symbol;Acc:HGNC:12449]	0	0	0	0	0	0	0	0	0	0	0	0	0	0
ENSMUSG00000001755	71743	Coasy	Coenzyme A synthase [Source:MGI Symbol;Acc:MGI:1918993]	244	197	299	183	235	304	254	247	300	ENSG00000011638	57146	TMEM159	transmembrane protein 159 [Source:HGNC Symbol;Acc:HGNC:30136]	21	13	56	105	27	14	19	31	37	48	28	22	52	69
ENSMUSG00000001761	319757	Smo	smoothened, frizzled class receptor [Source:MGI Symbol;Acc:MGI:108075]	2616	2246	3538	2601	2966	3521	2403	3033	3579	ENSG00000011677	2556	GABRA3	gamma-aminobutyric acid type A receptor alpha3 subunit [Source:HGNC Symbol;Acc:HGNC:4077]	19	21	5	12	0	0	8	9	54	51	0	0	32	34
ENSMUSG00000001763	232670	Tspan33	tetraspanin 33 [Source:MGI Symbol;Acc:MGI:1919012]	122	138	168	140	191	177	113	148	153	ENSG00000012048	672	BRCA1	BRCA1 DNA repair associated [Source:HGNC Symbol;Acc:HGNC:1100]	440	527	83	104	469	541	385	508	313	341	300	351	244	284
ENSMUSG00000001767	66877	Crnkl1	crooked neck pre-mRNA splicing factor 1 [Source:MGI Symbol;Acc:MGI:1914127]	627	495	773	598	647	777	487	696	799	ENSG00000012061	2067	ERCC1	ERCC excision repair 1, endonuclease non-catalytic subunit [Source:HGNC Symbol;Acc:HGNC:3433]	260	278	272	353	373	380	328	481	359	319	286	301	229	222
ENSMUSG00000001768	74030	Rin2	Ras and Rab interactor 2 [Source:MGI Symbol;Acc:MGI:1921280]	317	251	310	224	283	298	377	321	374	ENSG00000012124	933	CD22	CD22 molecule [Source:HGNC Symbol;Acc:HGNC:1643]	1	1	0	1	0	0	1	1	6	2	3	0	1	2
ENSMUSG00000001773	53320	Folh1	folate hydrolase 1 [Source:MGI Symbol;Acc:MGI:1858193]	5	0	4	3	2	8	6	3	6	ENSG00000012171	7869	SEMA3B	semaphorin 3B [Source:HGNC Symbol;Acc:HGNC:10724]	14	11	12	11	5	5	83	112	21	14	17	16	25	26
ENSMUSG00000001774	66917	Chordc1	cysteine and histidine-rich domain (CHORD)-containing, zinc-binding protein 1 [Source:MGI Symbol;Acc:MGI:1914167]	1164	1099	1706	1208	1350	1625	969	1369	1769	ENSG00000012174	51360	MBTPS2	membrane bound transcription factor peptidase, site 2 [Source:HGNC Symbol;Acc:HGNC:15455]	307	335	288	404	278	307	272	336	257	265	191	181	154	165
ENSMUSG00000001783	28088	Rtcb	RNA 2',3'-cyclic phosphate and 5'-OH ligase [Source:MGI Symbol;Acc:MGI:106379]	1227	1077	1599	1175	1349	1571	1380	1343	1800	ENSG00000012211	4007	PRICKLE3	prickle planar cell polarity protein 3 [Source:HGNC Symbol;Acc:HGNC:6645]	0	1	27	36	2	1	4	11	1	2	4	2	4	4
ENSMUSG00000001785	103136	Pwp1	PWP1 homolog, endonuclein [Source:MGI Symbol;Acc:MGI:1914735]	773	664	1057	854	934	1105	841	1028	1291	ENSG00000012223	4057	LTF	lactotransferrin [Source:HGNC Symbol;Acc:HGNC:6720]	0	0	0	0	0	0	0	0	0	1	0	0	0	0
ENSMUSG00000001786	69754	Fbxo7	F-box protein 7 [Source:MGI Symbol;Acc:MGI:1917004]	177	150	193	123	147	164	159	150	165	ENSG00000012232	2137	EXTL3	exostosin like glycosyltransferase 3 [Source:HGNC Symbol;Acc:HGNC:3518]	1217	1606	355	564	1473	1492	1137	1512	1096	1076	897	1077	963	1030
ENSMUSG00000001794	12336	Capns1	calpain, small subunit 1 [Source:MGI Symbol;Acc:MGI:88266]	999	836	1311	885	968	1436	1344	1311	1349	ENSG00000012504	9971	NR1H4	nuclear receptor subfamily 1 group H member 4 [Source:HGNC Symbol;Acc:HGNC:7967]	0	0	0	0	1	1	0	0	0	0	0	0	0	0
ENSMUSG00000001802	435965	Lrp3	low density lipoprotein receptor-related protein 3 [Source:MGI Symbol;Acc:MGI:3584516]	686	594	863	691	684	919	804	783	883	ENSG00000012660	60481	ELOVL5	ELOVL fatty acid elongase 5 [Source:HGNC Symbol;Acc:HGNC:21308]	945	1093	1015	1623	1312	1429	1176	1572	996	1006	880	941	778	811
ENSMUSG00000001804	16769	Dsg4	desmoglein 4 [Source:MGI Symbol;Acc:MGI:2661061]	0	0	0	0	0	0	0	0	0	ENSG00000012779	240	ALOX5	arachidonate 5-lipoxygenase [Source:HGNC Symbol;Acc:HGNC:435]	3	0	0	0	0	1	2	3	1	1	0	2	1	1
ENSMUSG00000001815	14029	Evx2	even-skipped homeobox 2 [Source:MGI Symbol;Acc:MGI:95462]	1	0	1	2	2	0	0	16	0	ENSG00000012817	8284	KDM5D	lysine demethylase 5D [Source:HGNC Symbol;Acc:HGNC:11115]	1	0	256	450	0	0	427	540	426	493	434	481	639	653
ENSMUSG00000001819	15433	Hoxd13	homeobox D13 [Source:MGI Symbol;Acc:MGI:96205]	0	2	5	0	4	0	0	2	0	ENSG00000012822	57658	CALCOCO1	calcium binding and coiled-coil domain 1 [Source:HGNC Symbol;Acc:HGNC:29306]	154	170	431	694	180	185	218	287	358	327	312	343	318	355
ENSMUSG00000001823	15432	Hoxd12	homeobox D12 [Source:MGI Symbol;Acc:MGI:96204]	0	1	0	0	0	0	0	6	0	ENSG00000012963	55148	UBR7	ubiquitin protein ligase E3 component n-recognin 7 (putative) [Source:HGNC Symbol;Acc:HGNC:20344]	281	324	134	213	379	419	318	366	229	236	168	214	110	131
ENSMUSG00000001827	14275	Folr1	folate receptor 1 (adult) [Source:MGI Symbol;Acc:MGI:95568]	12	7	11	15	12	12	3	14	11	ENSG00000012983	11183	MAP4K5	mitogen-activated protein kinase kinase kinase kinase 5 [Source:HGNC Symbol;Acc:HGNC:6867]	340	417	420	652	363	400	404	528	451	439	348	383	292	330
ENSMUSG00000001829	20480	Clpb	ClpB caseinolytic peptidase B [Source:MGI Symbol;Acc:MGI:1100517]	478	432	603	398	502	661	559	503	683	ENSG00000013016	30845	EHD3	EH domain containing 3 [Source:HGNC Symbol;Acc:HGNC:3244]	51	58	143	249	40	50	68	77	90	67	37	45	67	86
ENSMUSG00000001833	235072	2022-09-07	septin 7 [Source:MGI Symbol;Acc:MGI:1335094]	2031	1749	2561	1818	2275	2650	2370	2556	2744	ENSG00000013275	5704	PSMC4	proteasome 26S subunit, ATPase 4 [Source:HGNC Symbol;Acc:HGNC:9551]	274	308	169	228	296	287	299	423	233	236	186	208	152	185
ENSMUSG00000001844	72881	Zdhhc4	zinc finger, DHHC domain containing 4 [Source:MGI Symbol;Acc:MGI:1920131]	219	266	292	208	236	278	264	291	305	ENSG00000013288	23324	MAN2B2	mannosidase alpha class 2B member 2 [Source:HGNC Symbol;Acc:HGNC:29623]	165	203	370	663	209	188	196	267	160	182	169	158	153	172
ENSMUSG00000001847	19353	Rac1	Rac family small GTPase 1 [Source:MGI Symbol;Acc:MGI:97845]	3033	2565	4029	2832	3214	4105	3165	3396	3993	ENSG00000013293	57709	SLC7A14	solute carrier family 7 member 14 [Source:HGNC Symbol;Acc:HGNC:29326]	294	291	47	66	7	6	11	5	122	136	9	5	14	14
ENSMUSG00000001855	227720	Nup214	nucleoporin 214 [Source:MGI Symbol;Acc:MGI:1095411]	1918	1560	2373	1791	1920	2225	1653	2128	2316	ENSG00000013297	5010	CLDN11	claudin 11 [Source:HGNC Symbol;Acc:HGNC:8514]	31	38	596	879	9	10	11	12	63	60	7	3	24	21
ENSMUSG00000001864	108897	Aif1l	allograft inflammatory factor 1-like [Source:MGI Symbol;Acc:MGI:1919598]	772	586	848	694	687	1002	380	655	695	ENSG00000013306	51629	SLC25A39	solute carrier family 25 member 39 [Source:HGNC Symbol;Acc:HGNC:24279]	346	383	265	366	252	259	340	452	270	252	156	184	188	210
ENSMUSG00000001865	12873	Cpa3	carboxypeptidase A3, mast cell [Source:MGI Symbol;Acc:MGI:88479]	0	0	0	0	0	0	0	0	0	ENSG00000013364	9961	MVP	major vault protein [Source:HGNC Symbol;Acc:HGNC:7531]	15	17	150	205	3	2	25	42	25	30	4	13	33	49
ENSMUSG00000001870	268977	Ltbp1	latent transforming growth factor beta binding protein 1 [Source:MGI Symbol;Acc:MGI:109151]	679	545	991	747	746	948	1252	1058	1120	ENSG00000013374	51667	NUB1	negative regulator of ubiquitin like proteins 1 [Source:HGNC Symbol;Acc:HGNC:17623]	138	145	194	307	177	192	181	211	192	176	141	167	177	197
ENSMUSG00000001891	216558	Ugp2	UDP-glucose pyrophosphorylase 2 [Source:MGI Symbol;Acc:MGI:2183447]	279	289	430	266	316	428	370	354	420	ENSG00000013375	5238	PGM3	phosphoglucomutase 3 [Source:HGNC Symbol;Acc:HGNC:8907]	398	501	655	1041	526	570	543	714	532	525	425	498	430	461
ENSMUSG00000001901	192775	Kcnh6	potassium voltage-gated channel, subfamily H (eag-related), member 6 [Source:MGI Symbol;Acc:MGI:2684139]	5	2	10	8	8	6	10	13	11	ENSG00000013392	112611	RWDD2A	RWD domain containing 2A [Source:HGNC Symbol;Acc:HGNC:21385]	35	51	48	75	36	41	54	37	42	46	38	42	34	46
ENSMUSG00000001909	212528	Trmt1	tRNA methyltransferase 1 [Source:MGI Symbol;Acc:MGI:1289155]	597	603	793	608	664	777	704	871	835	ENSG00000013441	1195	CLK1	CDC like kinase 1 [Source:HGNC Symbol;Acc:HGNC:2068]	153	155	97	192	205	240	206	262	193	153	152	194	161	161
ENSMUSG00000001910	66830	Nacc1	nucleus accumbens associated 1, BEN and BTB (POZ) domain containing [Source:MGI Symbol;Acc:MGI:1914080]	3150	2653	4030	3207	3442	4003	3018	3841	4308	ENSG00000013503	55703	POLR3B	RNA polymerase III subunit B [Source:HGNC Symbol;Acc:HGNC:30348]	102	158	67	102	109	110	118	140	96	78	59	78	72	95
ENSMUSG00000001911	18032	Nfix	nuclear factor I/X [Source:MGI Symbol;Acc:MGI:97311]	13	16	16	14	17	14	19	4	8	ENSG00000013523	23357	ANGEL1	angel homolog 1 [Source:HGNC Symbol;Acc:HGNC:19961]	165	221	188	258	232	266	227	329	210	238	205	191	228	259
ENSMUSG00000001918	20514	Slc1a5	solute carrier family 1 (neutral amino acid transporter), member 5 [Source:MGI Symbol;Acc:MGI:105305]	596	566	764	616	633	751	994	822	810	ENSG00000013561	9604	RNF14	ring finger protein 14 [Source:HGNC Symbol;Acc:HGNC:10058]	307	354	183	235	204	248	167	259	235	189	156	138	130	160
ENSMUSG00000001924	22201	Uba1	ubiquitin-like modifier activating enzyme 1 [Source:MGI Symbol;Acc:MGI:98890]	5489	4589	7083	4713	5546	7045	6224	6389	7177	ENSG00000013563	1774	DNASE1L1	deoxyribonuclease 1 like 1 [Source:HGNC Symbol;Acc:HGNC:2957]	21	23	59	83	47	42	40	55	77	67	47	54	55	59
ENSMUSG00000001930	22371	Vwf	Von Willebrand factor [Source:MGI Symbol;Acc:MGI:98941]	89	90	90	57	100	115	173	133	136	ENSG00000013573	1663	DDX11	DEAD/H-box helicase 11 [Source:HGNC Symbol;Acc:HGNC:2736]	182	259	57	72	320	320	254	389	210	208	234	247	201	237
ENSMUSG00000001942	22619	Siae	sialic acid acetylesterase [Source:MGI Symbol;Acc:MGI:104803]	79	101	140	75	125	106	174	134	139	ENSG00000013583	50865	HEBP1	heme binding protein 1 [Source:HGNC Symbol;Acc:HGNC:17176]	62	68	145	197	75	82	78	115	98	85	55	82	83	80
ENSMUSG00000001943	57276	Vsig2	V-set and immunoglobulin domain containing 2 [Source:MGI Symbol;Acc:MGI:1928009]	8	5	6	4	6	8	12	18	17	ENSG00000013588	9052	GPRC5A	G protein-coupled receptor class C group 5 member A [Source:HGNC Symbol;Acc:HGNC:9836]	19	18	350	611	9	1	13	17	75	55	9	8	3	3
ENSMUSG00000001946	69524	Esam	endothelial cell-specific adhesion molecule [Source:MGI Symbol;Acc:MGI:1916774]	95	74	106	78	76	127	98	106	135	ENSG00000013619	10046	MAMLD1	mastermind like domain containing 1 [Source:HGNC Symbol;Acc:HGNC:2568]	124	166	372	639	203	221	192	316	162	155	141	168	44	59
ENSMUSG00000001948	20686	Spa17	sperm autoantigenic protein 17 [Source:MGI Symbol;Acc:MGI:1333778]	15	9	20	16	15	20	23	22	19	ENSG00000013725	923	CD6	CD6 molecule [Source:HGNC Symbol;Acc:HGNC:1691]	1	4	2	3	0	2	3	6	8	3	4	4	4	5
ENSMUSG00000001962	108160	Fam50a	family with sequence similarity 50, member A [Source:MGI Symbol;Acc:MGI:1351626]	302	238	362	221	298	347	361	346	455	ENSG00000013810	10460	TACC3	transforming acidic coiled-coil containing protein 3 [Source:HGNC Symbol;Acc:HGNC:11524]	378	458	124	214	491	450	387	561	428	388	375	395	379	442
ENSMUSG00000001964	13726	Emd	emerin [Source:MGI Symbol;Acc:MGI:108117]	372	372	572	398	462	564	459	504	606	ENSG00000014123	23376	UFL1	UFM1 specific ligase 1 [Source:HGNC Symbol;Acc:HGNC:23039]	171	219	185	293	256	255	200	342	210	192	157	193	181	230
ENSMUSG00000001983	70207	Taco1	translational activator of mitochondrially encoded cytochrome c oxidase I [Source:MGI Symbol;Acc:MGI:1917457]	97	103	157	100	136	180	99	100	158	ENSG00000014138	23649	POLA2	DNA polymerase alpha 2, accessory subunit [Source:HGNC Symbol;Acc:HGNC:30073]	219	309	57	86	324	297	274	351	172	179	157	147	125	103
ENSMUSG00000001985	14807	Grik3	glutamate receptor, ionotropic, kainate 3 [Source:MGI Symbol;Acc:MGI:95816]	27	24	75	21	33	80	51	50	75	ENSG00000014164	23144	ZC3H3	zinc finger CCCH-type containing 3 [Source:HGNC Symbol;Acc:HGNC:28972]	178	189	139	209	183	191	161	229	197	150	155	167	156	185
ENSMUSG00000001986	53623	Gria3	glutamate receptor, ionotropic, AMPA3 (alpha 3) [Source:MGI Symbol;Acc:MGI:95810]	131	142	136	121	164	132	262	249	208	ENSG00000014216	823	CAPN1	calpain 1 [Source:HGNC Symbol;Acc:HGNC:1476]	350	403	409	683	304	267	284	386	320	304	240	273	291	389
ENSMUSG00000001988	18142	Npas1	neuronal PAS domain protein 1 [Source:MGI Symbol;Acc:MGI:109205]	12	8	22	9	7	20	6	9	7	ENSG00000014257	55	ACPP	acid phosphatase, prostate [Source:HGNC Symbol;Acc:HGNC:125]	0	0	0	0	0	0	7	3	2	3	1	1	1	0
ENSMUSG00000001995	244668	Sipa1l2	signal-induced proliferation-associated 1 like 2 [Source:MGI Symbol;Acc:MGI:2676970]	593	485	590	424	489	696	404	495	562	ENSG00000014641	4190	MDH1	malate dehydrogenase 1 [Source:HGNC Symbol;Acc:HGNC:6970]	328	441	279	495	396	429	425	473	429	394	299	337	318	390
ENSMUSG00000001998	108011	Ap4e1	adaptor-related protein complex AP-4, epsilon 1 [Source:MGI Symbol;Acc:MGI:1336993]	329	342	375	299	346	371	380	374	422	ENSG00000014824	10463	SLC30A9	solute carrier family 30 member 9 [Source:HGNC Symbol;Acc:HGNC:1329]	357	481	246	397	497	605	555	566	517	511	376	406	382	427
ENSMUSG00000001999	109778	Blvra	biliverdin reductase A [Source:MGI Symbol;Acc:MGI:88170]	8	23	24	24	21	36	21	41	39	ENSG00000014914	10903	MTMR11	myotubularin related protein 11 [Source:HGNC Symbol;Acc:HGNC:24307]	27	16	138	251	8	7	68	90	46	33	32	39	44	53
ENSMUSG00000002006	245469	Pdzd4	PDZ domain containing 4 [Source:MGI Symbol;Acc:MGI:2443483]	246	222	325	244	289	316	322	321	300	ENSG00000014919	1355	COX15	cytochrome c oxidase assembly homolog COX15 [Source:HGNC Symbol;Acc:HGNC:2263]	214	231	151	255	242	245	218	306	215	194	160	168	208	238
ENSMUSG00000002007	56504	Srpk3	serine/arginine-rich protein specific kinase 3 [Source:MGI Symbol;Acc:MGI:1891338]	10	14	12	15	15	15	9	10	13	ENSG00000015133	440193	CCDC88C	coiled-coil domain containing 88C [Source:HGNC Symbol;Acc:HGNC:19967]	100	109	30	66	243	264	216	297	262	266	238	286	237	284
ENSMUSG00000002010	15929	Idh3g	isocitrate dehydrogenase 3 (NAD+), gamma [Source:MGI Symbol;Acc:MGI:1099463]	674	593	879	627	719	865	775	914	1069	ENSG00000015153	10138	YAF2	YY1 associated factor 2 [Source:HGNC Symbol;Acc:HGNC:17363]	131	143	120	156	192	215	180	318	193	167	148	141	169	171
ENSMUSG00000002012	93843	Pnck	pregnancy upregulated non-ubiquitously expressed CaM kinase [Source:MGI Symbol;Acc:MGI:1347357]	13	4	16	10	7	12	10	13	11	ENSG00000015171	10771	ZMYND11	zinc finger MYND-type containing 11 [Source:HGNC Symbol;Acc:HGNC:16966]	447	547	416	624	480	502	486	651	490	542	350	377	297	328
ENSMUSG00000002014	20832	Ssr4	signal sequence receptor, delta [Source:MGI Symbol;Acc:MGI:1099464]	257	222	350	283	272	361	331	364	414	ENSG00000015285	7454	WAS	WASP actin nucleation promoting factor [Source:HGNC Symbol;Acc:HGNC:12731]	1	1	0	2	2	4	1	0	0	0	5	2	4	2
ENSMUSG00000002015	27061	Bcap31	B cell receptor associated protein 31 [Source:MGI Symbol;Acc:MGI:1350933]	370	358	449	386	402	514	413	498	557	ENSG00000015413	1800	DPEP1	dipeptidase 1 [Source:HGNC Symbol;Acc:HGNC:3002]	0	0	0	0	0	0	0	0	0	1	0	0	6	8
ENSMUSG00000002017	72722	Fam98a	family with sequence similarity 98, member A [Source:MGI Symbol;Acc:MGI:1919972]	584	555	782	602	650	746	489	623	829	ENSG00000015475	637	BID	BH3 interacting domain death agonist [Source:HGNC Symbol;Acc:HGNC:1050]	64	68	58	98	70	77	101	116	47	56	47	70	72	75
ENSMUSG00000002020	16997	Ltbp2	latent transforming growth factor beta binding protein 2 [Source:MGI Symbol;Acc:MGI:99502]	8	2	3	2	9	15	6	1	2	ENSG00000015479	9782	MATR3	matrin 3 [Source:HGNC Symbol;Acc:HGNC:6912]	1570	1974	744	1472	2043	2210	1599	1858	2119	1463	1770	1911	1556	1284
ENSMUSG00000002028	214162	Kmt2a	lysine (K)-specific methyltransferase 2A [Source:MGI Symbol;Acc:MGI:96995]	4022	3383	3970	3411	3926	3750	6019	6276	6730	ENSG00000015520	29881	NPC1L1	NPC1 like intracellular cholesterol transporter 1 [Source:HGNC Symbol;Acc:HGNC:7898]	0	1	0	0	0	0	1	1	0	2	0	0	8	4
ENSMUSG00000002031	76568	Ift46	intraflagellar transport 46 [Source:MGI Symbol;Acc:MGI:1923818]	267	217	266	197	241	276	299	336	342	ENSG00000015532	64132	XYLT2	xylosyltransferase 2 [Source:HGNC Symbol;Acc:HGNC:15517]	108	136	156	253	148	170	165	250	161	148	106	117	156	177
ENSMUSG00000002032	71687	Tmem25	transmembrane protein 25 [Source:MGI Symbol;Acc:MGI:1918937]	12	11	21	9	6	7	19	8	14	ENSG00000015568	84220	RGPD5	RANBP2 like and GRIP domain containing 5 [Source:HGNC Symbol;Acc:HGNC:32418]	25	61	61	145	87	108	127	12	116	119	34	44	110	90
ENSMUSG00000002033	12502	Cd3g	CD3 antigen, gamma polypeptide [Source:MGI Symbol;Acc:MGI:88333]	1	1	0	1	0	0	0	4	0	ENSG00000015592	81551	STMN4	stathmin 4 [Source:HGNC Symbol;Acc:HGNC:16078]	24	29	0	0	18	20	47	72	105	77	22	20	45	44
ENSMUSG00000002043	67091	Trappc6a	trafficking protein particle complex 6A [Source:MGI Symbol;Acc:MGI:1914341]	35	30	44	26	42	46	102	43	71	ENSG00000015676	23386	NUDCD3	NudC domain containing 3 [Source:HGNC Symbol;Acc:HGNC:22208]	277	359	347	496	374	379	421	494	442	440	295	343	296	378
ENSMUSG00000002052	20926	Supt6	SPT6, histone chaperone and transcription elongation factor [Source:MGI Symbol;Acc:MGI:107726]	2653	2205	3163	2341	2701	3364	2963	3392	3804	ENSG00000016082	3670	ISL1	ISL LIM homeobox 1 [Source:HGNC Symbol;Acc:HGNC:6132]	6	5	0	0	3	0	6	2	10	10	1	3	3	1
ENSMUSG00000002055	54141	Spag5	sperm associated antigen 5 [Source:MGI Symbol;Acc:MGI:1927470]	1087	969	1227	949	934	1305	1154	1270	1220	ENSG00000016391	55349	CHDH	choline dehydrogenase [Source:HGNC Symbol;Acc:HGNC:24288]	18	25	11	22	36	38	26	48	23	15	12	23	16	18
ENSMUSG00000002057	15218	Foxn1	forkhead box N1 [Source:MGI Symbol;Acc:MGI:102949]	0	0	1	0	0	0	1	7	0	ENSG00000016402	53832	IL20RA	interleukin 20 receptor subunit alpha [Source:HGNC Symbol;Acc:HGNC:6003]	2	0	2	8	1	1	1	1	0	4	1	0	0	0
ENSMUSG00000002058	22248	Unc119	unc-119 lipid binding chaperone [Source:MGI Symbol;Acc:MGI:1328357]	221	206	337	221	235	301	224	285	309	ENSG00000016490	1179	CLCA1	chloride channel accessory 1 [Source:HGNC Symbol;Acc:HGNC:2015]	0	0	0	2	0	0	0	0	1	0	0	0	0	0
ENSMUSG00000002059	19376	Rab34	RAB34, member RAS oncogene family [Source:MGI Symbol;Acc:MGI:104606]	323	262	498	289	344	443	547	450	498	ENSG00000016602	22802	CLCA4	chloride channel accessory 4 [Source:HGNC Symbol;Acc:HGNC:2018]	0	1	0	0	0	0	1	0	0	0	0	0	0	0
ENSMUSG00000002064	20316	Sdf2	stromal cell derived factor 2 [Source:MGI Symbol;Acc:MGI:108019]	94	94	152	111	121	163	127	142	131	ENSG00000016864	55830	GLT8D1	glycosyltransferase 8 domain containing 1 [Source:HGNC Symbol;Acc:HGNC:24870]	123	181	245	388	192	223	222	255	219	205	161	191	164	173
ENSMUSG00000002068	12447	Ccne1	cyclin E1 [Source:MGI Symbol;Acc:MGI:88316]	1040	882	1426	1191	1401	1587	567	1256	1317	ENSG00000017260	27032	ATP2C1	ATPase secretory pathway Ca2+ transporting 1 [Source:HGNC Symbol;Acc:HGNC:13211]	446	527	344	572	552	591	569	804	534	493	402	410	424	434
ENSMUSG00000002076	74377	Hsf2bp	heat shock transcription factor 2 binding protein [Source:MGI Symbol;Acc:MGI:1921627]	3	0	4	0	2	9	1	3	7	ENSG00000017427	3479	IGF1	insulin like growth factor 1 [Source:HGNC Symbol;Acc:HGNC:5464]	0	0	139	236	0	1	4	3	1	3	0	1	2	0
ENSMUSG00000002083	170770	Bbc3	BCL2 binding component 3 [Source:MGI Symbol;Acc:MGI:2181667]	89	75	100	74	118	129	184	118	120	ENSG00000017483	92745	SLC38A5	solute carrier family 38 member 5 [Source:HGNC Symbol;Acc:HGNC:18070]	1	1	1	1	3	0	12	13	3	1	0	0	2	4
ENSMUSG00000002100	17868	Mybpc3	myosin binding protein C, cardiac [Source:MGI Symbol;Acc:MGI:102844]	2	0	0	0	0	0	0	0	0	ENSG00000017797	10928	RALBP1	ralA binding protein 1 [Source:HGNC Symbol;Acc:HGNC:9841]	285	331	337	617	287	316	317	364	308	299	231	250	264	336
ENSMUSG00000002102	19182	Psmc3	proteasome (prosome, macropain) 26S subunit, ATPase 3 [Source:MGI Symbol;Acc:MGI:1098754]	1282	1090	1721	1168	1391	1790	1140	1469	1678	ENSG00000018189	22902	RUFY3	RUN and FYVE domain containing 3 [Source:HGNC Symbol;Acc:HGNC:30285]	989	1228	406	689	1341	1436	990	1434	1126	1146	948	1010	659	781
ENSMUSG00000002103	11432	Acp2	acid phosphatase 2, lysosomal [Source:MGI Symbol;Acc:MGI:87882]	481	403	563	430	473	530	560	554	630	ENSG00000018236	1272	CNTN1	contactin 1 [Source:HGNC Symbol;Acc:HGNC:2171]	42	48	11	14	20	24	106	149	76	78	15	21	23	34
ENSMUSG00000002104	19400	Rapsn	receptor-associated protein of the synapse [Source:MGI Symbol;Acc:MGI:99422]	1	2	4	5	6	6	0	3	7	ENSG00000018280	6556	SLC11A1	solute carrier family 11 member 1 [Source:HGNC Symbol;Acc:HGNC:10907]	3	2	2	0	2	1	3	3	5	5	4	2	0	3
ENSMUSG00000002105	68427	Slc39a13	solute carrier family 39 (metal ion transporter), member 13 [Source:MGI Symbol;Acc:MGI:1915677]	108	102	155	66	108	139	146	107	167	ENSG00000018408	25937	WWTR1	WW domain containing transcription regulator 1 [Source:HGNC Symbol;Acc:HGNC:24042]	862	1051	1031	1497	636	674	1369	1965	926	899	786	840	620	732
ENSMUSG00000002107	14007	Celf2	CUGBP, Elav-like family member 2 [Source:MGI Symbol;Acc:MGI:1338822]	1098	886	1232	841	866	1068	1353	1150	1206	ENSG00000018510	8540	AGPS	alkylglycerone phosphate synthase [Source:HGNC Symbol;Acc:HGNC:327]	298	362	232	346	299	335	365	476	334	284	230	285	256	253
ENSMUSG00000002108	22259	Nr1h3	nuclear receptor subfamily 1, group H, member 3 [Source:MGI Symbol;Acc:MGI:1352462]	10	13	16	12	10	5	6	11	12	ENSG00000018607	.	ZNF806	zinc finger protein 806 [Source:HGNC Symbol;Acc:HGNC:33228]	2	0	0	0	1	1	2	0	0	2	3	2	0	0
ENSMUSG00000002109	107986	Ddb2	damage specific DNA binding protein 2 [Source:MGI Symbol;Acc:MGI:1355314]	104	63	90	54	75	96	104	88	81	ENSG00000018610	63932	CXorf56	chromosome X open reading frame 56 [Source:HGNC Symbol;Acc:HGNC:26239]	43	47	21	37	37	50	35	41	39	36	32	36	45	45
ENSMUSG00000002111	20375	Spi1	spleen focus forming virus (SFFV) proviral integration oncogene [Source:MGI Symbol;Acc:MGI:98282]	8	11	8	4	13	3	2	4	0	ENSG00000018625	477	ATP1A2	ATPase Na+/K+ transporting subunit alpha 2 [Source:HGNC Symbol;Acc:HGNC:800]	1083	1298	16	10	13	24	386	530	560	574	93	97	880	965
ENSMUSG00000002129	67465	Sf3a1	splicing factor 3a, subunit 1 [Source:MGI Symbol;Acc:MGI:1914715]	4055	3282	5111	3931	4111	5060	3542	4448	5214	ENSG00000018699	55622	TTC27	tetratricopeptide repeat domain 27 [Source:HGNC Symbol;Acc:HGNC:25986]	99	127	78	166	99	116	125	122	86	86	64	92	78	89
ENSMUSG00000002147	20852	Stat6	signal transducer and activator of transcription 6 [Source:MGI Symbol;Acc:MGI:103034]	85	50	94	53	78	71	196	115	140	ENSG00000018869	147948	ZNF582	zinc finger protein 582 [Source:HGNC Symbol;Acc:HGNC:26421]	13	19	7	11	25	38	18	14	12	12	20	17	13	12
ENSMUSG00000002190	12745	Clgn	calmegin [Source:MGI Symbol;Acc:MGI:107472]	51	48	45	34	57	75	43	36	24	ENSG00000019102	23584	VSIG2	V-set and immunoglobulin domain containing 2 [Source:HGNC Symbol;Acc:HGNC:17149]	5	4	0	1	0	6	2	1	1	0	4	4	3	1
ENSMUSG00000002204	16541	Napsa	napsin A aspartic peptidase [Source:MGI Symbol;Acc:MGI:109365]	2	0	1	0	2	2	4	1	2	ENSG00000019144	23187	PHLDB1	pleckstrin homology like domain family B member 1 [Source:HGNC Symbol;Acc:HGNC:23697]	495	562	658	1057	752	808	604	899	946	846	710	815	783	818
ENSMUSG00000002205	101568	Vrk3	vaccinia related kinase 3 [Source:MGI Symbol;Acc:MGI:2182465]	228	215	335	206	227	295	325	285	335	ENSG00000019169	8685	MARCO	macrophage receptor with collagenous structure [Source:HGNC Symbol;Acc:HGNC:6895]	0	0	0	0	0	0	0	0	0	0	1	0	0	0
ENSMUSG00000002210	71997	Smg9	smg-9 homolog, nonsense mediated mRNA decay factor (C. elegans) [Source:MGI Symbol;Acc:MGI:1919247]	173	147	184	161	201	226	273	285	272	ENSG00000019186	1591	CYP24A1	cytochrome P450 family 24 subfamily A member 1 [Source:HGNC Symbol;Acc:HGNC:2602]	0	0	2	2	0	1	27	26	4	5	2	1	1	3
ENSMUSG00000002221	55982	Paxip1	PAX interacting (with transcription-activation domain) protein 1 [Source:MGI Symbol;Acc:MGI:1890430]	2097	1736	2194	1912	1971	2369	1753	2366	2308	ENSG00000019485	56981	PRDM11	PR/SET domain 11 [Source:HGNC Symbol;Acc:HGNC:13996]	142	154	152	242	137	122	167	240	199	156	102	101	125	135
ENSMUSG00000002222	68477	Rmnd5a	required for meiotic nuclear division 5 homolog A [Source:MGI Symbol;Acc:MGI:1915727]	1492	1365	2052	1448	1570	1944	2042	2142	2292	ENSG00000019505	57586	SYT13	synaptotagmin 13 [Source:HGNC Symbol;Acc:HGNC:14962]	51	57	0	7	2	2	64	64	145	126	12	13	37	60
ENSMUSG00000002227	17454	Mov10	Mov10 RISC complex RNA helicase [Source:MGI Symbol;Acc:MGI:97054]	173	145	209	139	150	213	198	222	163	ENSG00000019549	6591	SNAI2	snail family transcriptional repressor 2 [Source:HGNC Symbol;Acc:HGNC:11094]	726	775	352	535	14	18	339	455	241	248	62	71	50	63
ENSMUSG00000002228	71887	Ppm1j	protein phosphatase 1J [Source:MGI Symbol;Acc:MGI:1919137]	4	6	0	8	7	0	17	9	3	ENSG00000019582	972	CD74	CD74 molecule [Source:HGNC Symbol;Acc:HGNC:1697]	1	6	2	2	9	2	3	12	15	8	8	7	11	15
ENSMUSG00000002233	11853	Rhoc	ras homolog family member C [Source:MGI Symbol;Acc:MGI:106028]	157	152	155	112	113	162	182	149	210	ENSG00000019991	3082	HGF	hepatocyte growth factor [Source:HGNC Symbol;Acc:HGNC:4893]	14	12	103	118	4	1	3	4	79	51	39	42	21	32
ENSMUSG00000002240	73779	Prr27	proline rich 27 [Source:MGI Symbol;Acc:MGI:1921029]	0	0	0	0	2	0	0	0	0	ENSG00000019995	54764	ZRANB1	zinc finger RANBP2-type containing 1 [Source:HGNC Symbol;Acc:HGNC:18224]	230	304	225	372	285	310	295	478	407	346	276	317	328	339
ENSMUSG00000002249	21678	Tead3	TEA domain family member 3 [Source:MGI Symbol;Acc:MGI:109241]	355	260	348	269	298	321	356	375	337	ENSG00000020129	23154	NCDN	neurochondrin [Source:HGNC Symbol;Acc:HGNC:17597]	170	224	140	239	135	146	155	182	193	155	89	134	247	257
ENSMUSG00000002250	19015	Ppard	peroxisome proliferator activator receptor delta [Source:MGI Symbol;Acc:MGI:101884]	234	191	259	164	224	291	434	303	315	ENSG00000020181	25960	ADGRA2	adhesion G protein-coupled receptor A2 [Source:HGNC Symbol;Acc:HGNC:17849]	69	97	1427	2420	20	11	498	628	303	266	56	78	41	47
ENSMUSG00000002257	23853	Def6	differentially expressed in FDCP 6 [Source:MGI Symbol;Acc:MGI:1346328]	17	14	13	3	11	15	17	9	25	ENSG00000020219	.	CCT8L1P	chaperonin containing TCP1 subunit 8 like 1, pseudogene [Source:HGNC Symbol;Acc:HGNC:32153]	0	0	1	0	0	0	0	0	3	1	2	1	1	2
ENSMUSG00000002265	18616	Peg3	paternally expressed 3 [Source:MGI Symbol;Acc:MGI:104748]	6307	5089	6448	4631	5044	6583	8397	6818	7802	ENSG00000020256	55734	ZFP64	ZFP64 zinc finger protein [Source:HGNC Symbol;Acc:HGNC:15940]	160	239	178	283	231	215	252	287	233	234	164	240	275	239
ENSMUSG00000002266	22776	Zim1	zinc finger, imprinted 1 [Source:MGI Symbol;Acc:MGI:1341879]	59	42	56	41	66	64	114	57	96	ENSG00000020426	4331	MNAT1	MNAT1 component of CDK activating kinase [Source:HGNC Symbol;Acc:HGNC:7181]	60	61	78	110	88	70	110	120	90	77	64	65	65	59
ENSMUSG00000002274	70083	Metrn	meteorin, glial cell differentiation regulator [Source:MGI Symbol;Acc:MGI:1917333]	2153	2020	2743	2023	2158	2665	1913	2223	2463	ENSG00000020577	23034	SAMD4A	sterile alpha motif domain containing 4A [Source:HGNC Symbol;Acc:HGNC:23023]	566	696	269	429	481	424	329	459	723	632	670	605	348	414
ENSMUSG00000002279	76483	Lmf1	lipase maturation factor 1 [Source:MGI Symbol;Acc:MGI:1923733]	262	249	266	213	241	216	486	434	302	ENSG00000020633	864	RUNX3	RUNX family transcription factor 3 [Source:HGNC Symbol;Acc:HGNC:10473]	1	0	0	2	1	2	2	0	7	1	4	0	1	0
ENSMUSG00000002280	67563	Ciao3	cytosolic iron-sulfur assembly component 3 [Source:MGI Symbol;Acc:MGI:1914813]	195	194	246	171	177	257	270	236	240	ENSG00000020922	4361	MRE11	MRE11 homolog, double strand break repair nuclease [Source:HGNC Symbol;Acc:HGNC:7230]	156	184	73	101	200	179	219	282	179	169	170	210	186	217
ENSMUSG00000002289	57875	Angptl4	angiopoietin-like 4 [Source:MGI Symbol;Acc:MGI:1888999]	96	80	108	59	77	98	74	87	110	ENSG00000021300	58473	PLEKHB1	pleckstrin homology domain containing B1 [Source:HGNC Symbol;Acc:HGNC:19079]	25	31	9	9	70	78	38	57	78	54	47	50	58	61
ENSMUSG00000002297	27214	Dbf4	DBF4 zinc finger [Source:MGI Symbol;Acc:MGI:1351328]	1382	1198	1747	1284	1428	1545	1437	1608	1684	ENSG00000021355	1992	SERPINB1	serpin family B member 1 [Source:HGNC Symbol;Acc:HGNC:3311]	9	11	25	28	10	14	9	12	4	7	30	23	7	13
ENSMUSG00000002307	13163	Daxx	Fas death domain-associated protein [Source:MGI Symbol;Acc:MGI:1197015]	488	489	661	482	499	666	441	508	659	ENSG00000021461	64816	CYP3A43	cytochrome P450 family 3 subfamily A member 43 [Source:HGNC Symbol;Acc:HGNC:17450]	0	0	0	0	0	0	0	0	0	0	1	0	3	2
ENSMUSG00000002308	54219	Cd320	CD320 antigen [Source:MGI Symbol;Acc:MGI:1860083]	198	154	243	177	206	237	192	233	272	ENSG00000021488	11136	SLC7A9	solute carrier family 7 member 9 [Source:HGNC Symbol;Acc:HGNC:11067]	2	1	1	0	1	0	5	1	3	7	1	0	8	6
ENSMUSG00000002319	75751	Ipo4	importin 4 [Source:MGI Symbol;Acc:MGI:1923001]	1294	1049	1675	1341	1465	1673	1306	1637	1783	ENSG00000021574	6683	SPAST	spastin [Source:HGNC Symbol;Acc:HGNC:11233]	213	258	153	228	327	357	361	476	314	343	245	265	280	276
ENSMUSG00000002320	74140	Tm9sf1	transmembrane 9 superfamily member 1 [Source:MGI Symbol;Acc:MGI:1921390]	509	478	690	470	560	617	526	498	660	ENSG00000021645	9369	NRXN3	neurexin 3 [Source:HGNC Symbol;Acc:HGNC:8010]	343	400	161	291	2	6	345	453	213	174	31	28	94	132
ENSMUSG00000002324	56739	Rec8	REC8 meiotic recombination protein [Source:MGI Symbol;Acc:MGI:1929645]	42	24	32	30	29	53	67	49	53	ENSG00000021762	114879	OSBPL5	oxysterol binding protein like 5 [Source:HGNC Symbol;Acc:HGNC:16392]	134	191	134	218	195	177	150	246	194	150	142	152	123	150
ENSMUSG00000002325	16391	Irf9	interferon regulatory factor 9 [Source:MGI Symbol;Acc:MGI:107587]	134	107	127	109	89	141	76	75	116	ENSG00000021776	9716	AQR	aquarius intron-binding spliceosomal factor [Source:HGNC Symbol;Acc:HGNC:29513]	759	929	466	738	828	945	977	1287	804	755	609	655	624	765
ENSMUSG00000002326	105446	Gmpr2	guanosine monophosphate reductase 2 [Source:MGI Symbol;Acc:MGI:1917903]	217	196	298	200	200	328	230	279	267	ENSG00000021826	1373	CPS1	carbamoyl-phosphate synthase 1 [Source:HGNC Symbol;Acc:HGNC:2323]	197	249	240	449	312	296	119	155	453	467	232	265	358	447
ENSMUSG00000002329	67881	Mdp1	magnesium-dependent phosphatase 1 [Source:MGI Symbol;Acc:MGI:1915131]	217	210	264	236	214	256	303	286	351	ENSG00000021852	732	C8B	complement C8 beta chain [Source:HGNC Symbol;Acc:HGNC:1353]	0	0	0	0	0	0	0	0	0	0	0	0	0	0
ENSMUSG00000002332	52585	Dhrs1	dehydrogenase/reductase (SDR family) member 1 [Source:MGI Symbol;Acc:MGI:1196314]	218	199	248	129	166	235	177	197	243	ENSG00000022267	2273	FHL1	four and a half LIM domains 1 [Source:HGNC Symbol;Acc:HGNC:3702]	311	389	2426	3800	117	170	559	741	916	893	326	324	480	556
ENSMUSG00000002341	13004	Ncan	neurocan [Source:MGI Symbol;Acc:MGI:104694]	168	126	161	86	103	175	134	157	107	ENSG00000022277	51507	RTF2	replication termination factor 2 [Source:HGNC Symbol;Acc:HGNC:15890]	185	210	174	265	250	258	259	328	215	259	183	194	150	198
ENSMUSG00000002342	234371	Tmem161a	transmembrane protein 161A [Source:MGI Symbol;Acc:MGI:2384577]	149	121	190	167	153	222	264	174	197	ENSG00000022355	2554	GABRA1	gamma-aminobutyric acid type A receptor alpha1 subunit [Source:HGNC Symbol;Acc:HGNC:4075]	4	1	1	2	1	2	4	2	10	17	1	0	4	5
ENSMUSG00000002343	76813	Armc6	armadillo repeat containing 6 [Source:MGI Symbol;Acc:MGI:1924063]	131	175	236	147	195	195	106	148	158	ENSG00000022556	55655	NLRP2	NLR family pyrin domain containing 2 [Source:HGNC Symbol;Acc:HGNC:22948]	95	97	0	1	1	1	0	0	61	39	0	0	60	62
ENSMUSG00000002345	72368	Borcs8	BLOC-1 related complex subunit 8 [Source:MGI Symbol;Acc:MGI:1919618]	65	75	99	52	80	66	72	87	87	ENSG00000022567	57210	SLC45A4	solute carrier family 45 member 4 [Source:HGNC Symbol;Acc:HGNC:29196]	128	126	53	89	149	192	121	194	117	154	133	123	102	152
ENSMUSG00000002346	73095	Slc25a42	solute carrier family 25, member 42 [Source:MGI Symbol;Acc:MGI:1920345]	26	34	17	19	26	39	39	26	29	ENSG00000022840	9921	RNF10	ring finger protein 10 [Source:HGNC Symbol;Acc:HGNC:10055]	621	803	619	1000	571	633	623	925	782	703	483	536	511	662
ENSMUSG00000002365	66616	Snx9	sorting nexin 9 [Source:MGI Symbol;Acc:MGI:1913866]	286	264	343	279	346	386	368	359	441	ENSG00000022976	55778	ZNF839	zinc finger protein 839 [Source:HGNC Symbol;Acc:HGNC:20345]	55	59	21	61	59	65	61	69	51	52	56	50	41	75
ENSMUSG00000002372	71810	Ranbp3	RAN binding protein 3 [Source:MGI Symbol;Acc:MGI:1919060]	1124	897	1473	1045	1249	1377	921	1234	1448	ENSG00000023041	64429	ZDHHC6	zinc finger DHHC-type containing 6 [Source:HGNC Symbol;Acc:HGNC:19160]	120	182	113	143	142	171	140	207	116	123	111	131	78	77
ENSMUSG00000002379	69875	Ndufa11	NADH:ubiquinone oxidoreductase subunit A11 [Source:MGI Symbol;Acc:MGI:1917125]	298	262	433	299	354	428	229	359	452	ENSG00000023171	57476	GRAMD1B	GRAM domain containing 1B [Source:HGNC Symbol;Acc:HGNC:29214]	72	96	12	20	80	77	221	335	107	104	80	82	130	179
ENSMUSG00000002384	12164	Bmp8b	bone morphogenetic protein 8b [Source:MGI Symbol;Acc:MGI:107335]	16	25	26	15	15	27	13	21	24	ENSG00000023191	6050	RNH1	ribonuclease/angiogenin inhibitor 1 [Source:HGNC Symbol;Acc:HGNC:10074]	433	488	452	729	394	430	480	727	318	341	218	287	232	250
ENSMUSG00000002393	13864	Nr2f6	nuclear receptor subfamily 2, group F, member 6 [Source:MGI Symbol;Acc:MGI:1352453]	935	855	1313	855	1049	1228	858	1132	1333	ENSG00000023228	4719	NDUFS1	NADH:ubiquinone oxidoreductase core subunit S1 [Source:HGNC Symbol;Acc:HGNC:7707]	1130	1377	732	1055	1274	1434	1185	1643	1150	1051	783	986	857	964
ENSMUSG00000002395	67023	Use1	unconventional SNARE in the ER 1 homolog (S. cerevisiae) [Source:MGI Symbol;Acc:MGI:1914273]	162	135	192	154	188	184	185	217	299	ENSG00000023287	9821	RB1CC1	RB1 inducible coiled-coil 1 [Source:HGNC Symbol;Acc:HGNC:15574]	313	376	298	447	389	406	450	576	454	502	369	441	453	505
ENSMUSG00000002396	77090	Ocel1	occludin/ELL domain containing 1 [Source:MGI Symbol;Acc:MGI:1924340]	343	291	350	335	320	399	300	372	313	ENSG00000023318	23071	ERP44	endoplasmic reticulum protein 44 [Source:HGNC Symbol;Acc:HGNC:18311]	205	279	285	404	199	246	259	306	266	248	191	212	191	201
ENSMUSG00000002409	13549	Dyrk1b	dual-specificity tyrosine-(Y)-phosphorylation regulated kinase 1b [Source:MGI Symbol;Acc:MGI:1330302]	418	341	444	317	325	461	586	459	441	ENSG00000023330	211	ALAS1	5'-aminolevulinate synthase 1 [Source:HGNC Symbol;Acc:HGNC:396]	229	271	123	253	202	211	197	307	218	242	150	183	221	242
ENSMUSG00000002413	109880	Braf	Braf transforming gene [Source:MGI Symbol;Acc:MGI:88190]	1533	1381	1736	1458	1571	1722	2357	2114	2146	ENSG00000023445	330	BIRC3	baculoviral IAP repeat containing 3 [Source:HGNC Symbol;Acc:HGNC:591]	3	1	6	9	7	3	3	5	9	4	7	2	2	4
ENSMUSG00000002416	68198	Ndufb2	NADH:ubiquinone oxidoreductase subunit B2 [Source:MGI Symbol;Acc:MGI:1915448]	157	144	208	134	154	188	142	185	188	ENSG00000023516	11215	AKAP11	A-kinase anchoring protein 11 [Source:HGNC Symbol;Acc:HGNC:369]	907	1072	552	875	1342	1393	1107	1373	1028	1008	898	992	787	928
ENSMUSG00000002428	20585	Hltf	helicase-like transcription factor [Source:MGI Symbol;Acc:MGI:1196437]	375	335	503	363	361	524	487	519	523	ENSG00000023572	51022	GLRX2	glutaredoxin 2 [Source:HGNC Symbol;Acc:HGNC:16065]	179	200	95	140	202	200	140	252	168	174	119	109	164	163
ENSMUSG00000002455	68879	Prpf6	pre-mRNA splicing factor 6 [Source:MGI Symbol;Acc:MGI:1922946]	1072	907	1286	1045	1116	1354	1247	1288	1586	ENSG00000023608	6617	SNAPC1	small nuclear RNA activating complex polypeptide 1 [Source:HGNC Symbol;Acc:HGNC:11134]	16	30	16	39	16	22	24	45	11	23	19	25	29	27
ENSMUSG00000002458	56470	Rgs19	regulator of G-protein signaling 19 [Source:MGI Symbol;Acc:MGI:1915153]	280	218	336	205	247	342	294	287	348	ENSG00000023697	51071	DERA	deoxyribose-phosphate aldolase [Source:HGNC Symbol;Acc:HGNC:24269]	90	121	71	110	77	88	74	103	43	56	53	51	50	51
ENSMUSG00000002459	58175	Rgs20	regulator of G-protein signaling 20 [Source:MGI Symbol;Acc:MGI:1929866]	20	14	22	16	19	31	10	16	8	ENSG00000023734	11171	STRAP	serine/threonine kinase receptor associated protein [Source:HGNC Symbol;Acc:HGNC:30796]	446	509	315	515	500	486	555	552	438	455	304	377	402	481
ENSMUSG00000002475	106861	Abhd3	abhydrolase domain containing 3 [Source:MGI Symbol;Acc:MGI:2147183]	1	6	4	3	6	2	3	0	3	ENSG00000023839	1244	ABCC2	ATP binding cassette subfamily C member 2 [Source:HGNC Symbol;Acc:HGNC:53]	326	386	4	2	16	13	19	22	11	5	12	13	15	15
ENSMUSG00000002477	20641	Snrpd1	small nuclear ribonucleoprotein D1 [Source:MGI Symbol;Acc:MGI:98344]	813	823	1201	895	1004	1223	796	966	1254	ENSG00000023892	50619	DEF6	DEF6 guanine nucleotide exchange factor [Source:HGNC Symbol;Acc:HGNC:2760]	0	0	8	14	1	0	4	2	1	1	1	2	3	2
ENSMUSG00000002486	77832	Tchp	trichoplein, keratin filament binding [Source:MGI Symbol;Acc:MGI:1925082]	239	201	269	231	225	242	185	216	230	ENSG00000023902	51177	PLEKHO1	pleckstrin homology domain containing O1 [Source:HGNC Symbol;Acc:HGNC:24310]	196	243	199	335	346	332	272	431	330	275	314	343	294	354
ENSMUSG00000002489	21844	Tiam1	T cell lymphoma invasion and metastasis 1 [Source:MGI Symbol;Acc:MGI:103306]	993	795	1184	884	1014	1130	1339	1287	1380	ENSG00000023909	2730	GCLM	glutamate-cysteine ligase modifier subunit [Source:HGNC Symbol;Acc:HGNC:4312]	169	184	64	99	114	90	59	91	56	76	40	51	64	71
ENSMUSG00000002496	22084	Tsc2	TSC complex subunit 2 [Source:MGI Symbol;Acc:MGI:102548]	1387	1163	1567	1146	1227	1571	1461	1493	1584	ENSG00000024048	23304	UBR2	ubiquitin protein ligase E3 component n-recognin 2 [Source:HGNC Symbol;Acc:HGNC:21289]	313	343	289	419	346	404	345	467	365	358	318	329	305	359
ENSMUSG00000002500	66211	Rpl3l	ribosomal protein L3-like [Source:MGI Symbol;Acc:MGI:1913461]	0	0	0	0	0	1	0	0	0	ENSG00000024422	30846	EHD2	EH domain containing 2 [Source:HGNC Symbol;Acc:HGNC:3243]	64	87	1580	2523	18	25	269	339	104	132	26	18	53	48
ENSMUSG00000002504	65962	Slc9a3r2	solute carrier family 9 (sodium/hydrogen exchanger), member 3 regulator 2 [Source:MGI Symbol;Acc:MGI:1890662]	95	76	138	91	126	119	69	108	115	ENSG00000024526	55635	DEPDC1	DEP domain containing 1 [Source:HGNC Symbol;Acc:HGNC:22949]	296	336	149	241	218	270	289	365	320	287	192	267	472	492
ENSMUSG00000002524	67959	Puf60	poly-U binding splicing factor 60 [Source:MGI Symbol;Acc:MGI:1915209]	1367	1237	1857	1360	1474	1823	1328	1642	1890	ENSG00000024862	25901	CCDC28A	coiled-coil domain containing 28A [Source:HGNC Symbol;Acc:HGNC:21098]	10	8	15	19	6	13	10	11	11	11	5	9	10	18
ENSMUSG00000002546	99412	Golga2	golgi autoantigen, golgin subfamily a, 2 [Source:MGI Symbol;Acc:MGI:2139395]	473	354	532	397	417	491	542	469	640	ENSG00000025039	58528	RRAGD	Ras related GTP binding D [Source:HGNC Symbol;Acc:HGNC:19903]	167	206	43	60	248	277	319	387	261	222	162	222	172	203
ENSMUSG00000002550	22245	Uck1	uridine-cytidine kinase 1 [Source:MGI Symbol;Acc:MGI:98904]	259	229	378	291	287	343	197	294	357	ENSG00000025156	3298	HSF2	heat shock transcription factor 2 [Source:HGNC Symbol;Acc:HGNC:5225]	123	154	56	73	175	201	178	248	176	156	172	163	173	216
ENSMUSG00000002565	20259	Scin	scinderin [Source:MGI Symbol;Acc:MGI:1306794]	1	1	0	1	1	0	2	1	3	ENSG00000025293	51230	PHF20	PHD finger protein 20 [Source:HGNC Symbol;Acc:HGNC:16098]	292	370	214	332	381	421	436	551	389	392	355	359	461	529
ENSMUSG00000002578	22781	Ikzf4	IKAROS family zinc finger 4 [Source:MGI Symbol;Acc:MGI:1343139]	124	118	127	90	93	115	158	163	118	ENSG00000025423	8630	HSD17B6	hydroxysteroid 17-beta dehydrogenase 6 [Source:HGNC Symbol;Acc:HGNC:23316]	1	0	0	0	0	1	0	2	2	3	0	1	1	1
ENSMUSG00000002580	103742	Mien1	migration and invasion enhancer 1 [Source:MGI Symbol;Acc:MGI:1913678]	61	72	102	47	93	125	81	98	98	ENSG00000025434	10062	NR1H3	nuclear receptor subfamily 1 group H member 3 [Source:HGNC Symbol;Acc:HGNC:7966]	32	28	13	24	29	28	36	44	27	35	34	39	49	52
ENSMUSG00000002588	18979	Pon1	paraoxonase 1 [Source:MGI Symbol;Acc:MGI:103295]	0	0	2	2	0	1	0	0	0	ENSG00000025708	1890	TYMP	thymidine phosphorylase [Source:HGNC Symbol;Acc:HGNC:3148]	24	20	22	13	28	26	14	30	26	16	12	14	15	23
ENSMUSG00000002602	26362	Axl	AXL receptor tyrosine kinase [Source:MGI Symbol;Acc:MGI:1347244]	203	127	185	108	113	168	167	140	131	ENSG00000025770	29781	NCAPH2	non-SMC condensin II complex subunit H2 [Source:HGNC Symbol;Acc:HGNC:25071]	246	241	78	106	231	279	242	290	191	176	159	191	114	97
ENSMUSG00000002603	21803	Tgfb1	transforming growth factor, beta 1 [Source:MGI Symbol;Acc:MGI:98725]	112	121	134	109	99	145	173	173	172	ENSG00000025772	10953	TOMM34	translocase of outer mitochondrial membrane 34 [Source:HGNC Symbol;Acc:HGNC:15746]	125	140	66	125	129	126	142	199	120	117	99	105	124	149
ENSMUSG00000002608	52132	Ccdc97	coiled-coil domain containing 97 [Source:MGI Symbol;Acc:MGI:1196455]	426	354	572	385	425	442	423	445	441	ENSG00000025796	11231	SEC63	SEC63 homolog, protein translocation regulator [Source:HGNC Symbol;Acc:HGNC:21082]	489	617	489	810	455	528	611	752	515	537	426	446	368	419
ENSMUSG00000002617	22700	Zfp40	zinc finger protein 40 [Source:MGI Symbol;Acc:MGI:99185]	235	164	219	186	174	238	293	258	256	ENSG00000025800	23633	KPNA6	karyopherin subunit alpha 6 [Source:HGNC Symbol;Acc:HGNC:6399]	869	1069	818	1347	1081	1082	1006	1331	1033	1049	772	883	1254	1453
ENSMUSG00000002625	54194	Akap8l	A kinase (PRKA) anchor protein 8-like [Source:MGI Symbol;Acc:MGI:1860606]	378	331	406	350	370	396	914	565	505	ENSG00000026025	7431	VIM	vimentin [Source:HGNC Symbol;Acc:HGNC:12692]	13604	16293	7375	12313	17464	18134	13739	16920	14275	13617	14252	16320	8017	9225
ENSMUSG00000002633	20423	Shh	sonic hedgehog [Source:MGI Symbol;Acc:MGI:98297]	207	137	264	216	61	261	242	191	125	ENSG00000026036	.	RTEL1-TNFRSF6B	RTEL1-TNFRSF6B readthrough (NMD candidate) [Source:HGNC Symbol;Acc:HGNC:44095]	76	75	52	84	80	82	77	80	74	69	74	92	69	79
ENSMUSG00000002635	68079	Pdcd2l	programmed cell death 2-like [Source:MGI Symbol;Acc:MGI:1915329]	130	139	156	139	123	165	149	171	189	ENSG00000026103	355	FAS	Fas cell surface death receptor [Source:HGNC Symbol;Acc:HGNC:11920]	24	45	71	74	41	41	55	83	50	45	34	42	33	43
ENSMUSG00000002658	98053	Gtf2f1	general transcription factor IIF, polypeptide 1 [Source:MGI Symbol;Acc:MGI:1923848]	470	403	659	483	584	641	506	534	644	ENSG00000026297	8635	RNASET2	ribonuclease T2 [Source:HGNC Symbol;Acc:HGNC:21686]	21	33	5	22	40	37	32	47	37	41	29	54	47	48
ENSMUSG00000002660	53895	Clpp	caseinolytic mitochondrial matrix peptidase proteolytic subunit [Source:MGI Symbol;Acc:MGI:1858213]	304	245	302	242	263	397	298	352	361	ENSG00000026508	960	CD44	CD44 molecule (Indian blood group) [Source:HGNC Symbol;Acc:HGNC:1681]	91	121	1153	1785	160	144	178	214	100	79	67	86	40	32
ENSMUSG00000002661	66400	Alkbh7	alkB homolog 7 [Source:MGI Symbol;Acc:MGI:1913650]	79	76	86	52	63	88	59	93	73	ENSG00000026559	3755	KCNG1	potassium voltage-gated channel modifier subfamily G member 1 [Source:HGNC Symbol;Acc:HGNC:6248]	76	93	60	124	49	60	79	125	32	25	30	33	39	57
ENSMUSG00000002664	19197	Pspn	persephin [Source:MGI Symbol;Acc:MGI:1201684]	1	0	0	1	0	0	0	2	4	ENSG00000026652	56895	AGPAT4	1-acylglycerol-3-phosphate O-acyltransferase 4 [Source:HGNC Symbol;Acc:HGNC:20885]	538	596	243	350	803	881	882	1223	786	738	755	833	737	910
ENSMUSG00000002668	70785	Dennd1c	DENN/MADD domain containing 1C [Source:MGI Symbol;Acc:MGI:1918035]	32	24	15	14	17	42	22	24	14	ENSG00000026751	57823	SLAMF7	SLAM family member 7 [Source:HGNC Symbol;Acc:HGNC:21394]	1	1	0	0	1	0	3	1	6	2	0	0	0	0
ENSMUSG00000002679	69792	Med6	mediator complex subunit 6 [Source:MGI Symbol;Acc:MGI:1917042]	215	199	318	225	225	306	175	265	272	ENSG00000026950	11119	BTN3A1	butyrophilin subfamily 3 member A1 [Source:HGNC Symbol;Acc:HGNC:1138]	49	44	142	194	69	51	55	80	65	63	54	71	58	69
ENSMUSG00000002688	18760	Prkd1	protein kinase D1 [Source:MGI Symbol;Acc:MGI:99879]	216	160	256	212	216	266	288	299	248	ENSG00000027001	4285	MIPEP	mitochondrial intermediate peptidase [Source:HGNC Symbol;Acc:HGNC:7104]	53	82	21	37	66	82	99	108	49	37	28	34	40	42
ENSMUSG00000002699	16822	Lcp2	lymphocyte cytosolic protein 2 [Source:MGI Symbol;Acc:MGI:1321402]	12	13	9	8	7	7	25	15	26	ENSG00000027075	5583	PRKCH	protein kinase C eta [Source:HGNC Symbol;Acc:HGNC:9403]	4	7	9	17	1	0	3	2	13	5	4	4	3	2
ENSMUSG00000002718	110750	Cse1l	chromosome segregation 1-like (S. cerevisiae) [Source:MGI Symbol;Acc:MGI:1339951]	3215	2913	4212	3272	3789	4355	3211	3996	4194	ENSG00000027644	3645	INSRR	insulin receptor related receptor [Source:HGNC Symbol;Acc:HGNC:6093]	0	2	3	9	0	0	1	4	3	2	2	1	1	1
ENSMUSG00000002728	67877	Naa20	N(alpha)-acetyltransferase 20, NatB catalytic subunit [Source:MGI Symbol;Acc:MGI:1915127]	362	375	447	440	415	520	337	407	496	ENSG00000027697	3459	IFNGR1	interferon gamma receptor 1 [Source:HGNC Symbol;Acc:HGNC:5439]	132	160	203	245	124	159	154	219	152	152	104	125	121	108
ENSMUSG00000002731	23992	Prkra	protein kinase, interferon inducible double stranded RNA dependent activator [Source:MGI Symbol;Acc:MGI:1344375]	278	293	426	299	348	372	364	344	402	ENSG00000027847	11285	B4GALT7	beta-1,4-galactosyltransferase 7 [Source:HGNC Symbol;Acc:HGNC:930]	76	80	99	174	122	125	92	142	106	102	76	86	58	95
ENSMUSG00000002732	14231	Fkbp7	FK506 binding protein 7 [Source:MGI Symbol;Acc:MGI:1336879]	17	21	16	10	14	25	36	45	34	ENSG00000027869	9047	SH2D2A	SH2 domain containing 2A [Source:HGNC Symbol;Acc:HGNC:10821]	2	0	0	2	2	2	2	1	2	2	2	1	4	6
ENSMUSG00000002733	83435	Plekha3	pleckstrin homology domain-containing, family A (phosphoinositide binding specific) member 3 [Source:MGI Symbol;Acc:MGI:1932515]	255	255	350	251	293	344	226	279	356	ENSG00000028116	7444	VRK2	VRK serine/threonine kinase 2 [Source:HGNC Symbol;Acc:HGNC:12719]	112	150	41	80	5	12	19	21	22	26	11	13	36	47
ENSMUSG00000002741	56418	Ykt6	YKT6 v-SNARE homolog (S. cerevisiae) [Source:MGI Symbol;Acc:MGI:1927550]	844	782	1168	859	910	1177	620	930	1093	ENSG00000028137	7133	TNFRSF1B	TNF receptor superfamily member 1B [Source:HGNC Symbol;Acc:HGNC:11917]	33	43	40	39	12	14	27	24	15	14	5	8	27	33
ENSMUSG00000002748	22385	Baz1b	bromodomain adjacent to zinc finger domain, 1B [Source:MGI Symbol;Acc:MGI:1353499]	5179	4563	6001	4639	4914	6145	4710	5748	6101	ENSG00000028203	55591	VEZT	vezatin, adherens junctions transmembrane protein [Source:HGNC Symbol;Acc:HGNC:18258]	482	618	331	499	541	560	523	726	648	610	470	572	467	557
ENSMUSG00000002763	224824	Pex6	peroxisomal biogenesis factor 6 [Source:MGI Symbol;Acc:MGI:2385054]	412	392	552	397	395	477	524	546	648	ENSG00000028277	5452	POU2F2	POU class 2 homeobox 2 [Source:HGNC Symbol;Acc:HGNC:9213]	20	36	24	48	87	83	131	202	122	98	64	71	76	81
ENSMUSG00000002767	27398	Mrpl2	mitochondrial ribosomal protein L2 [Source:MGI Symbol;Acc:MGI:1351622]	361	374	520	382	429	467	496	506	627	ENSG00000028310	65980	BRD9	bromodomain containing 9 [Source:HGNC Symbol;Acc:HGNC:25818]	227	271	129	203	289	310	252	329	273	259	233	210	234	290
ENSMUSG00000002768	17256	Mea1	male enhanced antigen 1 [Source:MGI Symbol;Acc:MGI:96957]	244	193	347	242	223	272	260	278	382	ENSG00000028528	6642	SNX1	sorting nexin 1 [Source:HGNC Symbol;Acc:HGNC:11172]	355	426	316	439	443	475	445	570	413	369	395	427	315	341
ENSMUSG00000002769	14711	Gnmt	glycine N-methyltransferase [Source:MGI Symbol;Acc:MGI:1202304]	2	3	1	2	9	3	3	2	5	ENSG00000028839	9519	TBPL1	TATA-box binding protein like 1 [Source:HGNC Symbol;Acc:HGNC:11589]	114	115	60	91	147	226	190	205	152	154	120	134	103	118
ENSMUSG00000002771	14814	Grin2d	glutamate receptor, ionotropic, NMDA2D (epsilon 4) [Source:MGI Symbol;Acc:MGI:95823]	8	14	11	12	22	8	32	30	18	ENSG00000029153	56938	ARNTL2	aryl hydrocarbon receptor nuclear translocator like 2 [Source:HGNC Symbol;Acc:HGNC:18984]	17	15	34	59	166	178	79	95	67	62	72	88	44	46
ENSMUSG00000002778	68137	Kdelr1	KDEL (Lys-Asp-Glu-Leu) endoplasmic reticulum protein retention receptor 1 [Source:MGI Symbol;Acc:MGI:1915387]	550	453	738	451	549	635	662	603	805	ENSG00000029363	9774	BCLAF1	BCL2 associated transcription factor 1 [Source:HGNC Symbol;Acc:HGNC:16863]	1369	1613	907	1320	1728	1882	1686	2297	1478	1466	1167	1310	1134	1232
ENSMUSG00000002781	70209	Tmem143	transmembrane protein 143 [Source:MGI Symbol;Acc:MGI:1917459]	110	144	155	114	172	110	244	190	202	ENSG00000029364	55334	SLC39A9	solute carrier family 39 member 9 [Source:HGNC Symbol;Acc:HGNC:20182]	392	474	431	682	484	506	454	541	496	509	334	425	302	343
ENSMUSG00000002791	.	Pdxk-ps	pyridoxal (pyridoxine, vitamin B6) kinase, pseudogene [Source:MGI Symbol;Acc:MGI:1933201]	0	0	0	1	0	1	1	2	3	ENSG00000029534	286	ANK1	ankyrin 1 [Source:HGNC Symbol;Acc:HGNC:492]	56	71	158	233	25	28	33	52	33	38	21	25	12	11
ENSMUSG00000002797	110175	Ggct	gamma-glutamyl cyclotransferase [Source:MGI Symbol;Acc:MGI:95700]	45	39	56	43	58	74	73	56	76	ENSG00000029559	3381	IBSP	integrin binding sialoprotein [Source:HGNC Symbol;Acc:HGNC:5341]	2	0	3	0	0	1	0	0	2	1	0	1	1	0
ENSMUSG00000002799	16450	Jag2	jagged 2 [Source:MGI Symbol;Acc:MGI:1098270]	212	238	289	165	262	279	453	385	383	ENSG00000029639	51106	TFB1M	transcription factor B1, mitochondrial [Source:HGNC Symbol;Acc:HGNC:17037]	53	59	48	58	66	83	54	74	40	33	64	51	61	64
ENSMUSG00000002803	399566	Btbd6	BTB (POZ) domain containing 6 [Source:MGI Symbol;Acc:MGI:3026623]	154	149	177	151	167	179	164	190	176	ENSG00000029725	9135	RABEP1	rabaptin, RAB GTPase binding effector protein 1 [Source:HGNC Symbol;Acc:HGNC:17677]	397	517	276	398	501	526	414	562	439	443	324	381	343	389
ENSMUSG00000002804	66174	Nudt14	nudix (nucleoside diphosphate linked moiety X)-type motif 14 [Source:MGI Symbol;Acc:MGI:1913424]	57	47	91	35	58	77	63	79	86	ENSG00000029993	3149	HMGB3	high mobility group box 3 [Source:HGNC Symbol;Acc:HGNC:5004]	396	457	97	154	393	462	531	660	430	423	328	420	270	340
ENSMUSG00000002808	105298	Epdr1	ependymin related protein 1 (zebrafish) [Source:MGI Symbol;Acc:MGI:2145369]	76	68	108	94	138	134	118	79	108	ENSG00000030066	23279	NUP160	nucleoporin 160 [Source:HGNC Symbol;Acc:HGNC:18017]	638	687	324	550	884	968	918	1232	777	757	565	671	652	763
ENSMUSG00000002812	14248	Flii	flightless I actin binding protein [Source:MGI Symbol;Acc:MGI:1342286]	892	708	1111	775	742	1133	1010	910	1076	ENSG00000030110	578	BAK1	BCL2 antagonist/killer 1 [Source:HGNC Symbol;Acc:HGNC:949]	75	107	60	86	80	103	83	123	87	72	56	74	65	109
ENSMUSG00000002814	21975	Top3a	topoisomerase (DNA) III alpha [Source:MGI Symbol;Acc:MGI:1197527]	357	373	480	379	368	460	466	392	438	ENSG00000030304	4593	MUSK	muscle associated receptor tyrosine kinase [Source:HGNC Symbol;Acc:HGNC:7525]	6	6	4	6	7	16	124	178	7	13	5	3	1	3
ENSMUSG00000002820	235040	Atg4d	autophagy related 4D, cysteine peptidase [Source:MGI Symbol;Acc:MGI:2444308]	248	196	294	186	212	270	221	170	228	ENSG00000030419	22807	IKZF2	IKAROS family zinc finger 2 [Source:HGNC Symbol;Acc:HGNC:13177]	103	144	53	79	233	211	75	100	296	270	199	246	252	249
ENSMUSG00000002825	60507	Qtrt1	queuine tRNA-ribosyltransferase catalytic subunit 1 [Source:MGI Symbol;Acc:MGI:1931441]	162	147	233	169	202	187	203	260	257	ENSG00000030582	2896	GRN	granulin precursor [Source:HGNC Symbol;Acc:HGNC:4601]	481	599	1063	1798	244	250	321	468	434	385	326	321	298	339
ENSMUSG00000002831	57435	Plin4	perilipin 4 [Source:MGI Symbol;Acc:MGI:1929709]	40	39	44	49	43	39	33	37	34	ENSG00000031003	51306	FAM13B	family with sequence similarity 13 member B [Source:HGNC Symbol;Acc:HGNC:1335]	245	291	208	260	227	271	219	282	330	294	233	291	230	270
ENSMUSG00000002833	15193	Hdgfl2	HDGF like 2 [Source:MGI Symbol;Acc:MGI:1194492]	640	551	774	596	606	741	704	781	895	ENSG00000031081	57514	ARHGAP31	Rho GTPase activating protein 31 [Source:HGNC Symbol;Acc:HGNC:29216]	216	241	529	854	99	108	214	276	135	140	79	84	29	28
ENSMUSG00000002835	27221	Chaf1a	chromatin assembly factor 1, subunit A (p150) [Source:MGI Symbol;Acc:MGI:1351331]	1684	1465	1978	1464	1571	2006	1322	1739	1935	ENSG00000031691	55166	CENPQ	centromere protein Q [Source:HGNC Symbol;Acc:HGNC:21347]	61	65	16	35	73	83	86	99	68	55	52	57	59	63
ENSMUSG00000002844	11544	Adprh	ADP-ribosylarginine hydrolase [Source:MGI Symbol;Acc:MGI:1098234]	895	802	1157	723	892	1180	777	899	1166	ENSG00000031698	6301	SARS	seryl-tRNA synthetase [Source:HGNC Symbol;Acc:HGNC:10537]	519	686	740	1182	656	696	577	709	563	508	386	411	539	621
ENSMUSG00000002845	67846	Tmem39a	transmembrane protein 39a [Source:MGI Symbol;Acc:MGI:1915096]	370	320	485	355	370	483	460	420	490	ENSG00000031823	8498	RANBP3	RAN binding protein 3 [Source:HGNC Symbol;Acc:HGNC:9850]	315	404	243	390	379	404	398	556	336	345	308	325	276	313
ENSMUSG00000002846	76916	Timmdc1	translocase of inner mitochondrial membrane domain containing 1 [Source:MGI Symbol;Acc:MGI:1922139]	201	145	290	203	192	248	222	261	293	ENSG00000032219	5926	ARID4A	AT-rich interaction domain 4A [Source:HGNC Symbol;Acc:HGNC:9885]	165	184	115	150	214	212	201	266	276	218	217	211	221	203
ENSMUSG00000002847	85031	Pla1a	phospholipase A1 member A [Source:MGI Symbol;Acc:MGI:1934677]	0	0	0	2	0	1	1	0	1	ENSG00000032389	7260	EIPR1	EARP complex and GARP complex interacting protein 1 [Source:HGNC Symbol;Acc:HGNC:12383]	118	107	56	91	102	109	85	154	93	101	74	76	83	89
ENSMUSG00000002870	17216	Mcm2	minichromosome maintenance complex component 2 [Source:MGI Symbol;Acc:MGI:105380]	3480	2897	4267	3096	3377	4277	3262	3850	4375	ENSG00000032444	10908	PNPLA6	patatin like phospholipase domain containing 6 [Source:HGNC Symbol;Acc:HGNC:16268]	212	257	219	369	218	206	214	260	239	234	185	189	328	339
ENSMUSG00000002871	24100	Tpra1	transmembrane protein, adipocyte asscociated 1 [Source:MGI Symbol;Acc:MGI:1345190]	118	116	154	105	151	196	190	149	188	ENSG00000032742	8100	IFT88	intraflagellar transport 88 [Source:HGNC Symbol;Acc:HGNC:20606]	72	110	48	74	86	77	77	100	82	78	85	60	65	65
ENSMUSG00000002881	17936	Nab1	Ngfi-A binding protein 1 [Source:MGI Symbol;Acc:MGI:107564]	135	127	168	128	151	154	235	218	229	ENSG00000033011	56052	ALG1	ALG1 chitobiosyldiphosphodolichol beta-mannosyltransferase [Source:HGNC Symbol;Acc:HGNC:18294]	63	70	97	145	56	52	48	87	74	64	58	56	43	63
ENSMUSG00000002885	26364	Adgre5	adhesion G protein-coupled receptor E5 [Source:MGI Symbol;Acc:MGI:1347095]	71	56	68	28	56	73	50	41	72	ENSG00000033030	55596	ZCCHC8	zinc finger CCHC-type containing 8 [Source:HGNC Symbol;Acc:HGNC:25265]	175	219	133	178	186	211	190	251	219	189	179	187	170	199
ENSMUSG00000002897	16172	Il17ra	interleukin 17 receptor A [Source:MGI Symbol;Acc:MGI:107399]	94	95	100	112	106	123	45	93	86	ENSG00000033050	10061	ABCF2	ATP binding cassette subfamily F member 2 [Source:HGNC Symbol;Acc:HGNC:71]	176	178	139	209	171	191	207	233	171	201	98	167	131	159
ENSMUSG00000002900	16777	Lamb1	laminin B1 [Source:MGI Symbol;Acc:MGI:96743]	1415	1092	1719	1296	1370	1676	2382	1900	2417	ENSG00000033100	54480	CHPF2	chondroitin polymerizing factor 2 [Source:HGNC Symbol;Acc:HGNC:29270]	217	274	602	989	297	272	237	284	264	305	196	249	203	231
ENSMUSG00000002908	84036	Kcnn1	potassium intermediate/small conductance calcium-activated channel, subfamily N, member 1 [Source:MGI Symbol;Acc:MGI:1933993]	37	30	39	31	27	32	47	47	35	ENSG00000033122	57554	LRRC7	leucine rich repeat containing 7 [Source:HGNC Symbol;Acc:HGNC:18531]	43	62	175	288	183	159	172	229	213	202	208	208	122	126
ENSMUSG00000002910	70807	Arrdc2	arrestin domain containing 2 [Source:MGI Symbol;Acc:MGI:1918057]	53	41	54	21	47	62	65	52	51	ENSG00000033170	2530	FUT8	fucosyltransferase 8 [Source:HGNC Symbol;Acc:HGNC:4019]	183	222	127	182	206	223	142	220	142	150	148	150	226	239
ENSMUSG00000002930	19051	Ppp1r17	protein phosphatase 1, regulatory subunit 17 [Source:MGI Symbol;Acc:MGI:1333876]	3	1	0	0	0	10	0	2	2	ENSG00000033178	55236	UBA6	ubiquitin like modifier activating enzyme 6 [Source:HGNC Symbol;Acc:HGNC:25581]	619	760	545	688	764	799	815	1053	762	726	559	620	615	693
ENSMUSG00000002944	12491	Cd36	CD36 molecule [Source:MGI Symbol;Acc:MGI:107899]	10	6	16	8	8	10	26	33	12	ENSG00000033327	9846	GAB2	GRB2 associated binding protein 2 [Source:HGNC Symbol;Acc:HGNC:14458]	246	336	311	492	293	332	302	414	374	353	334	381	408	427
ENSMUSG00000002948	26400	Map2k7	mitogen-activated protein kinase kinase 7 [Source:MGI Symbol;Acc:MGI:1346871]	681	563	825	582	727	768	816	734	867	ENSG00000033627	535	ATP6V0A1	ATPase H+ transporting V0 subunit a1 [Source:HGNC Symbol;Acc:HGNC:865]	360	410	316	486	525	508	404	529	601	609	414	480	473	543
ENSMUSG00000002949	21856	Timm44	translocase of inner mitochondrial membrane 44 [Source:MGI Symbol;Acc:MGI:1343262]	601	519	676	525	610	682	736	618	855	ENSG00000033800	8554	PIAS1	protein inhibitor of activated STAT 1 [Source:HGNC Symbol;Acc:HGNC:2752]	667	801	498	788	869	930	1032	1439	1106	1070	1000	1093	1101	1277
ENSMUSG00000002957	11772	Ap2a2	adaptor-related protein complex 2, alpha 2 subunit [Source:MGI Symbol;Acc:MGI:101920]	2335	1929	2896	1999	2263	2740	3052	2865	3372	ENSG00000033867	9497	SLC4A7	solute carrier family 4 member 7 [Source:HGNC Symbol;Acc:HGNC:11033]	704	852	600	827	1165	1252	1007	1397	1143	1091	1002	1065	1122	1437
ENSMUSG00000002963	59047	Pnkp	polynucleotide kinase 3'- phosphatase [Source:MGI Symbol;Acc:MGI:1891698]	88	89	143	110	119	122	162	146	157	ENSG00000034053	321	APBA2	amyloid beta precursor protein binding family A member 2 [Source:HGNC Symbol;Acc:HGNC:579]	258	334	29	68	272	251	196	280	195	165	199	199	155	184
ENSMUSG00000002968	75613	Med25	mediator complex subunit 25 [Source:MGI Symbol;Acc:MGI:1922863]	1696	1455	2048	1487	1745	2008	1625	1893	2146	ENSG00000034152	5606	MAP2K3	mitogen-activated protein kinase kinase 3 [Source:HGNC Symbol;Acc:HGNC:6843]	46	50	61	129	73	71	64	84	53	56	31	53	68	97
ENSMUSG00000002980	57278	Bcam	basal cell adhesion molecule [Source:MGI Symbol;Acc:MGI:1929940]	457	359	685	545	595	668	650	736	858	ENSG00000034239	79645	EFCAB1	EF-hand calcium binding domain 1 [Source:HGNC Symbol;Acc:HGNC:25678]	4	6	1	4	2	0	4	6	6	14	2	3	6	6
ENSMUSG00000002981	56457	Clptm1	cleft lip and palate associated transmembrane protein 1 [Source:MGI Symbol;Acc:MGI:1927155]	1010	901	1425	1015	1145	1261	1110	1199	1411	ENSG00000034510	9168	TMSB10	thymosin beta 10 [Source:HGNC Symbol;Acc:HGNC:11879]	1120	1362	2000	3096	1455	1695	1092	1538	1445	1325	1065	1073	807	856
ENSMUSG00000002983	19698	Relb	avian reticuloendotheliosis viral (v-rel) oncogene related B [Source:MGI Symbol;Acc:MGI:103289]	5	10	12	11	17	20	37	16	11	ENSG00000034533	28990	ASTE1	asteroid homolog 1 [Source:HGNC Symbol;Acc:HGNC:25021]	8	5	21	36	10	11	24	45	27	28	15	27	13	18
ENSMUSG00000002984	53333	Tomm40	translocase of outer mitochondrial membrane 40 [Source:MGI Symbol;Acc:MGI:1858259]	1321	1097	1826	1342	1570	1847	1322	1819	2153	ENSG00000034677	25897	RNF19A	ring finger protein 19A, RBR E3 ubiquitin protein ligase [Source:HGNC Symbol;Acc:HGNC:13432]	202	225	184	293	206	232	323	478	267	230	185	247	232	258
ENSMUSG00000002985	11816	Apoe	apolipoprotein E [Source:MGI Symbol;Acc:MGI:88057]	330	205	403	314	305	395	369	336	418	ENSG00000034693	8504	PEX3	peroxisomal biogenesis factor 3 [Source:HGNC Symbol;Acc:HGNC:8858]	40	50	33	50	33	35	37	36	42	35	31	25	35	34
ENSMUSG00000002992	11813	Apoc2	apolipoprotein C-II [Source:MGI Symbol;Acc:MGI:88054]	0	0	5	0	0	0	5	0	0	ENSG00000034713	11345	GABARAPL2	GABA type A receptor associated protein like 2 [Source:HGNC Symbol;Acc:HGNC:13291]	196	222	234	385	308	334	290	416	307	238	246	248	218	210
ENSMUSG00000002996	73389	Hbp1	high mobility group box transcription factor 1 [Source:MGI Symbol;Acc:MGI:894659]	502	409	565	383	378	592	643	707	646	ENSG00000034971	4653	MYOC	myocilin [Source:HGNC Symbol;Acc:HGNC:7610]	0	0	1	1	1	0	1	0	1	0	1	0	1	2
ENSMUSG00000002997	19088	Prkar2b	protein kinase, cAMP dependent regulatory, type II beta [Source:MGI Symbol;Acc:MGI:97760]	668	558	770	513	654	802	714	694	838	ENSG00000035115	26751	SH3YL1	SH3 and SYLF domain containing 1 [Source:HGNC Symbol;Acc:HGNC:29546]	158	189	185	223	172	177	152	274	191	178	174	181	223	252
ENSMUSG00000003031	12576	Cdkn1b	cyclin-dependent kinase inhibitor 1B [Source:MGI Symbol;Acc:MGI:104565]	563	446	736	432	502	588	832	693	631	ENSG00000035141	84908	FAM136A	family with sequence similarity 136 member A [Source:HGNC Symbol;Acc:HGNC:25911]	206	227	109	156	263	263	204	285	155	167	133	148	142	157
ENSMUSG00000003032	16600	Klf4	Kruppel-like factor 4 (gut) [Source:MGI Symbol;Acc:MGI:1342287]	24	24	38	13	40	39	35	16	27	ENSG00000035403	7414	VCL	vinculin [Source:HGNC Symbol;Acc:HGNC:12665]	2480	2831	2698	4550	1281	1327	1548	2095	2465	2464	1308	1529	1495	1576
ENSMUSG00000003033	11767	Ap1m1	adaptor-related protein complex AP-1, mu subunit 1 [Source:MGI Symbol;Acc:MGI:102776]	856	742	1086	714	873	1033	822	1010	1116	ENSG00000035499	55789	DEPDC1B	DEP domain containing 1B [Source:HGNC Symbol;Acc:HGNC:24902]	157	182	18	51	282	304	242	284	221	200	211	244	169	205
ENSMUSG00000003037	17274	Rab8a	RAB8A, member RAS oncogene family [Source:MGI Symbol;Acc:MGI:96960]	552	556	862	588	629	776	576	702	813	ENSG00000035664	23604	DAPK2	death associated protein kinase 2 [Source:HGNC Symbol;Acc:HGNC:2675]	52	50	16	33	11	13	21	25	34	27	19	12	21	16
ENSMUSG00000003038	15331	Hmgn2	high mobility group nucleosomal binding domain 2 [Source:MGI Symbol;Acc:MGI:96136]	4870	4366	5577	4378	5238	4786	3237	4581	4647	ENSG00000035681	8439	NSMAF	neutral sphingomyelinase activation associated factor [Source:HGNC Symbol;Acc:HGNC:8017]	200	250	205	295	174	226	235	330	178	159	167	193	155	184
ENSMUSG00000003039	67922	Fam32a	family with sequence similarity 32, member A [Source:MGI Symbol;Acc:MGI:1915172]	704	549	797	568	611	691	597	649	836	ENSG00000035687	159	ADSS	adenylosuccinate synthase [Source:HGNC Symbol;Acc:HGNC:292]	120	144	221	296	172	183	174	196	165	179	121	143	210	225
ENSMUSG00000003051	13710	Elf3	E74-like factor 3 [Source:MGI Symbol;Acc:MGI:1101781]	26	24	36	16	17	33	50	37	45	ENSG00000035720	26228	STAP1	signal transducing adaptor family member 1 [Source:HGNC Symbol;Acc:HGNC:24133]	0	1	0	0	1	4	1	2	0	2	0	2	1	3
ENSMUSG00000003053	13095	Cyp2c29	cytochrome P450, family 2, subfamily c, polypeptide 29 [Source:MGI Symbol;Acc:MGI:103238]	0	0	0	0	0	0	0	1	0	ENSG00000035862	7077	TIMP2	TIMP metallopeptidase inhibitor 2 [Source:HGNC Symbol;Acc:HGNC:11821]	1580	1906	4002	6263	2331	2476	2221	3039	1941	1972	1088	1321	851	1001
ENSMUSG00000003062	76205	Stard3nl	STARD3 N-terminal like [Source:MGI Symbol;Acc:MGI:1923455]	253	255	306	207	254	264	264	304	326	ENSG00000035928	5981	RFC1	replication factor C subunit 1 [Source:HGNC Symbol;Acc:HGNC:9969]	537	647	291	501	515	625	604	750	513	509	397	493	417	487
ENSMUSG00000003068	20869	Stk11	serine/threonine kinase 11 [Source:MGI Symbol;Acc:MGI:1341870]	1017	938	1328	1000	1050	1174	1070	1278	1343	ENSG00000036054	55773	TBC1D23	TBC1 domain family member 23 [Source:HGNC Symbol;Acc:HGNC:25622]	91	141	194	253	107	131	149	197	146	118	104	100	122	150
ENSMUSG00000003070	13637	Efna2	ephrin A2 [Source:MGI Symbol;Acc:MGI:102707]	681	647	876	605	644	854	519	670	799	ENSG00000036257	8452	CUL3	cullin 3 [Source:HGNC Symbol;Acc:HGNC:2553]	760	836	404	669	776	856	840	1043	780	675	682	707	563	661
ENSMUSG00000003072	66043	Atp5d	ATP synthase, H+ transporting, mitochondrial F1 complex, delta subunit [Source:MGI Symbol;Acc:MGI:1913293]	1276	1046	1533	1178	1212	1579	1494	1590	1784	ENSG00000036448	9172	MYOM2	myomesin 2 [Source:HGNC Symbol;Acc:HGNC:7614]	2	4	3	6	4	1	42	94	5	3	7	7	4	1
ENSMUSG00000003099	19060	Ppp5c	protein phosphatase 5, catalytic subunit [Source:MGI Symbol;Acc:MGI:102666]	902	751	1182	860	996	1151	973	1142	1321	ENSG00000036473	5009	OTC	ornithine carbamoyltransferase [Source:HGNC Symbol;Acc:HGNC:8512]	0	0	0	0	0	0	1	0	0	0	0	0	0	0
ENSMUSG00000003119	69131	Cdk12	cyclin-dependent kinase 12 [Source:MGI Symbol;Acc:MGI:1098802]	2500	2094	3114	2416	2533	2692	2339	2880	3283	ENSG00000036530	10858	CYP46A1	cytochrome P450 family 46 subfamily A member 1 [Source:HGNC Symbol;Acc:HGNC:2641]	37	72	10	10	124	108	34	55	95	92	72	77	40	51
ENSMUSG00000003123	16890	Lipe	lipase, hormone sensitive [Source:MGI Symbol;Acc:MGI:96790]	79	62	73	54	61	93	121	75	88	ENSG00000036549	26009	AC118549.1	zinc finger ZZ-type containing 3 [Source:NCBI gene;Acc:26009]	390	409	286	457	440	477	432	525	391	408	424	450	662	711
ENSMUSG00000003131	18475	Pafah1b2	platelet-activating factor acetylhydrolase, isoform 1b, subunit 2 [Source:MGI Symbol;Acc:MGI:108415]	3284	2858	4182	2883	3332	4108	3120	3790	3914	ENSG00000036565	6570	SLC18A1	solute carrier family 18 member A1 [Source:HGNC Symbol;Acc:HGNC:10934]	21	34	4	4	1	0	35	48	7	7	11	6	2	0
ENSMUSG00000003134	54610	Tbc1d8	TBC1 domain family, member 8 [Source:MGI Symbol;Acc:MGI:1927225]	173	142	218	124	145	189	135	169	142	ENSG00000036672	9099	USP2	ubiquitin specific peptidase 2 [Source:HGNC Symbol;Acc:HGNC:12618]	4	18	17	23	42	41	77	112	21	14	18	16	21	24
ENSMUSG00000003135	52846	Cnot11	CCR4-NOT transcription complex, subunit 11 [Source:MGI Symbol;Acc:MGI:106580]	761	633	1056	789	883	1001	639	943	1110	ENSG00000036828	846	CASR	calcium sensing receptor [Source:HGNC Symbol;Acc:HGNC:1514]	3	3	1	3	3	2	3	1	12	6	2	1	2	1
ENSMUSG00000003153	20527	Slc2a3	solute carrier family 2 (facilitated glucose transporter), member 3 [Source:MGI Symbol;Acc:MGI:95757]	1878	1674	3412	2572	3399	2929	16802	7499	9330	ENSG00000037042	27175	TUBG2	tubulin gamma 2 [Source:HGNC Symbol;Acc:HGNC:12419]	64	85	56	97	57	64	63	79	79	61	62	58	112	150
ENSMUSG00000003154	60611	Foxj2	forkhead box J2 [Source:MGI Symbol;Acc:MGI:1926805]	189	167	229	141	182	225	240	234	244	ENSG00000037241	51121	RPL26L1	ribosomal protein L26 like 1 [Source:HGNC Symbol;Acc:HGNC:17050]	49	57	32	47	40	58	41	64	36	37	30	39	22	24
ENSMUSG00000003161	109552	Sri	sorcin [Source:MGI Symbol;Acc:MGI:98419]	279	234	355	287	235	360	354	311	386	ENSG00000037280	2324	FLT4	fms related tyrosine kinase 4 [Source:HGNC Symbol;Acc:HGNC:3767]	15	14	4	6	70	84	36	49	34	21	28	33	24	27
ENSMUSG00000003166	13356	Dgcr2	DiGeorge syndrome critical region gene 2 [Source:MGI Symbol;Acc:MGI:892866]	1836	1696	2426	1644	1938	2444	1916	2117	2433	ENSG00000037474	54888	NSUN2	NOP2/Sun RNA methyltransferase 2 [Source:HGNC Symbol;Acc:HGNC:25994]	223	284	133	217	223	239	207	287	195	186	129	177	167	185
ENSMUSG00000003184	54131	Irf3	interferon regulatory factor 3 [Source:MGI Symbol;Acc:MGI:1859179]	294	262	363	312	297	324	328	383	333	ENSG00000037637	54455	FBXO42	F-box protein 42 [Source:HGNC Symbol;Acc:HGNC:29249]	339	408	317	440	476	481	419	564	466	417	349	425	476	534
ENSMUSG00000003190	75736	Bcl2l12	BCL2-like 12 (proline rich) [Source:MGI Symbol;Acc:MGI:1922986]	248	223	263	212	200	269	288	280	308	ENSG00000037749	4238	MFAP3	microfibril associated protein 3 [Source:HGNC Symbol;Acc:HGNC:7034]	179	219	207	359	230	257	219	301	281	249	213	218	170	206
ENSMUSG00000003198	224893	Zfp959	zinc finger protein 959 [Source:MGI Symbol;Acc:MGI:2385058]	60	82	90	71	62	94	67	84	95	ENSG00000037757	84245	MRI1	methylthioribose-1-phosphate isomerase 1 [Source:HGNC Symbol;Acc:HGNC:28469]	22	45	94	130	2	6	45	68	10	24	8	18	53	51
ENSMUSG00000003199	68047	Mpnd	MPN domain containing [Source:MGI Symbol;Acc:MGI:1915297]	484	436	578	398	405	588	572	575	662	ENSG00000037897	4234	METTL1	methyltransferase like 1 [Source:HGNC Symbol;Acc:HGNC:7030]	47	78	25	64	72	60	54	67	36	32	35	34	27	22
ENSMUSG00000003200	20405	Sh3gl1	SH3-domain GRB2-like 1 [Source:MGI Symbol;Acc:MGI:700010]	680	558	841	649	711	838	661	769	811	ENSG00000037965	3224	HOXC8	homeobox C8 [Source:HGNC Symbol;Acc:HGNC:5129]	0	0	0	3	0	2	82	129	1	1	3	2	2	0
ENSMUSG00000003206	50498	Ebi3	Epstein-Barr virus induced gene 3 [Source:MGI Symbol;Acc:MGI:1354171]	0	1	1	0	0	0	0	0	0	ENSG00000038002	175	AGA	aspartylglucosaminidase [Source:HGNC Symbol;Acc:HGNC:318]	26	31	27	24	26	30	28	30	16	23	20	25	15	15
ENSMUSG00000003208	72886	Yju2	YJU2 splicing factor [Source:MGI Symbol;Acc:MGI:1920136]	155	143	163	155	189	175	148	170	184	ENSG00000038210	55300	PI4K2B	phosphatidylinositol 4-kinase type 2 beta [Source:HGNC Symbol;Acc:HGNC:18215]	50	58	54	91	75	77	58	97	40	40	38	40	25	36
ENSMUSG00000003226	19386	Ranbp2	RAN binding protein 2 [Source:MGI Symbol;Acc:MGI:894323]	5097	4382	6151	4599	5418	5644	5213	5844	6850	ENSG00000038219	259282	BOD1L1	biorientation of chromosomes in cell division 1 like 1 [Source:HGNC Symbol;Acc:HGNC:31792]	692	872	589	907	665	739	822	1003	815	797	674	727	710	771
ENSMUSG00000003227	13608	Edar	ectodysplasin-A receptor [Source:MGI Symbol;Acc:MGI:1343498]	3	4	5	4	1	4	1	6	1	ENSG00000038274	27430	MAT2B	methionine adenosyltransferase 2B [Source:HGNC Symbol;Acc:HGNC:6905]	233	258	168	239	490	540	469	568	361	377	376	414	334	393
ENSMUSG00000003228	14773	Grk5	G protein-coupled receptor kinase 5 [Source:MGI Symbol;Acc:MGI:109161]	341	270	327	230	257	321	272	331	250	ENSG00000038295	7092	TLL1	tolloid like 1 [Source:HGNC Symbol;Acc:HGNC:11843]	2	9	191	273	75	71	54	72	216	216	49	36	7	6
ENSMUSG00000003233	13544	Dvl3	dishevelled segment polarity protein 3 [Source:MGI Symbol;Acc:MGI:108100]	1520	1319	1704	1126	1413	1610	1404	1460	1783	ENSG00000038358	23644	EDC4	enhancer of mRNA decapping 4 [Source:HGNC Symbol;Acc:HGNC:17157]	401	510	266	401	544	559	516	685	416	420	386	396	352	411
ENSMUSG00000003234	27406	Abcf3	ATP-binding cassette, sub-family F (GCN20), member 3 [Source:MGI Symbol;Acc:MGI:1351656]	402	347	504	368	386	433	384	405	495	ENSG00000038382	7204	TRIO	trio Rho guanine nucleotide exchange factor [Source:HGNC Symbol;Acc:HGNC:12303]	1454	1637	1725	2758	993	1064	1627	2217	1586	1564	1049	1198	979	1076
ENSMUSG00000003235	224045	Eif2b5	eukaryotic translation initiation factor 2B, subunit 5 epsilon [Source:MGI Symbol;Acc:MGI:2446176]	985	852	1439	1022	1152	1308	1186	1281	1473	ENSG00000038427	1462	VCAN	versican [Source:HGNC Symbol;Acc:HGNC:2464]	6920	8423	11558	19104	4109	4541	6881	8887	5889	5559	4523	5137	4227	4774
ENSMUSG00000003269	19158	Cyth2	cytohesin 2 [Source:MGI Symbol;Acc:MGI:1334255]	455	414	657	432	497	621	419	559	642	ENSG00000038532	23274	CLEC16A	C-type lectin domain containing 16A [Source:HGNC Symbol;Acc:HGNC:29013]	311	326	268	472	472	472	444	600	410	375	315	320	312	330
ENSMUSG00000003271	54200	Sult2b1	sulfotransferase family, cytosolic, 2B, member 1 [Source:MGI Symbol;Acc:MGI:1926342]	12	10	36	17	26	10	22	30	29	ENSG00000038945	4481	MSR1	macrophage scavenger receptor 1 [Source:HGNC Symbol;Acc:HGNC:7376]	0	0	8	9	2	1	0	7	2	1	3	4	0	0
ENSMUSG00000003273	12348	Car11	carbonic anhydrase 11 [Source:MGI Symbol;Acc:MGI:1336193]	11	9	15	8	10	19	32	23	23	ENSG00000039068	999	CDH1	cadherin 1 [Source:HGNC Symbol;Acc:HGNC:1748]	3	1	1	2	1	3	4	3	6	1	3	0	10	10
ENSMUSG00000003279	224997	Dlgap1	DLG associated protein 1 [Source:MGI Symbol;Acc:MGI:1346065]	19	22	12	10	21	13	15	31	8	ENSG00000039123	23517	MTREX	Mtr4 exosome RNA helicase [Source:HGNC Symbol;Acc:HGNC:18734]	428	522	327	476	557	624	652	763	500	500	472	462	487	581
ENSMUSG00000003282	56711	Plag1	pleiomorphic adenoma gene 1 [Source:MGI Symbol;Acc:MGI:1891916]	448	386	466	403	429	462	959	700	622	ENSG00000039139	1767	DNAH5	dynein axonemal heavy chain 5 [Source:HGNC Symbol;Acc:HGNC:2950]	23	14	10	11	6	0	9	14	24	24	13	20	36	35
ENSMUSG00000003283	15162	Hck	hemopoietic cell kinase [Source:MGI Symbol;Acc:MGI:96052]	3	8	7	0	2	3	6	6	3	ENSG00000039319	9765	ZFYVE16	zinc finger FYVE-type containing 16 [Source:HGNC Symbol;Acc:HGNC:20756]	497	617	280	407	540	617	532	681	574	475	449	510	476	559
ENSMUSG00000003299	66163	Mrpl4	mitochondrial ribosomal protein L4 [Source:MGI Symbol;Acc:MGI:2137210]	422	449	582	463	497	585	439	531	560	ENSG00000039523	79567	RIPOR1	RHO family interacting cell polarization regulator 1 [Source:HGNC Symbol;Acc:HGNC:25836]	268	305	585	932	544	554	457	642	540	502	469	554	284	333
ENSMUSG00000003308	50868	Keap1	kelch-like ECH-associated protein 1 [Source:MGI Symbol;Acc:MGI:1858732]	450	383	546	399	437	557	411	523	573	ENSG00000039537	729	C6	complement C6 [Source:HGNC Symbol;Acc:HGNC:1339]	0	1	0	0	0	0	0	1	1	0	0	0	0	0
ENSMUSG00000003309	11768	Ap1m2	adaptor protein complex AP-1, mu 2 subunit [Source:MGI Symbol;Acc:MGI:1336974]	75	65	147	118	105	148	132	140	136	ENSG00000039560	26064	RAI14	retinoic acid induced 14 [Source:HGNC Symbol;Acc:HGNC:14873]	267	295	1249	2006	711	808	1019	1496	912	936	734	806	451	489
ENSMUSG00000003316	20340	Glg1	golgi apparatus protein 1 [Source:MGI Symbol;Acc:MGI:104967]	2605	2256	3209	2181	2487	3159	3673	3189	3824	ENSG00000039600	11063	SOX30	SRY-box transcription factor 30 [Source:HGNC Symbol;Acc:HGNC:30635]	1	0	0	2	0	1	4	3	4	0	0	1	1	2
ENSMUSG00000003341	67331	Atp8b3	ATPase, class I, type 8B, member 3 [Source:MGI Symbol;Acc:MGI:1914581]	10	10	23	10	13	17	13	22	11	ENSG00000039650	11284	PNKP	polynucleotide kinase 3'-phosphatase [Source:HGNC Symbol;Acc:HGNC:9154]	97	144	85	136	153	151	132	173	119	114	93	105	90	115
ENSMUSG00000003344	208198	Btbd2	BTB (POZ) domain containing 2 [Source:MGI Symbol;Acc:MGI:1933831]	851	809	1141	717	837	1096	1072	1021	1141	ENSG00000039987	54831	BEST2	bestrophin 2 [Source:HGNC Symbol;Acc:HGNC:17107]	0	0	0	0	0	3	1	4	2	1	0	1	0	0
ENSMUSG00000003345	103236	Csnk1g2	casein kinase 1, gamma 2 [Source:MGI Symbol;Acc:MGI:1920014]	2683	2209	3236	2400	2594	3257	2856	3107	3480	ENSG00000040199	23035	PHLPP2	PH domain and leucine rich repeat protein phosphatase 2 [Source:HGNC Symbol;Acc:HGNC:29149]	241	281	159	239	247	256	276	332	300	262	231	234	209	222
ENSMUSG00000003346	216169	Abhd17a	abhydrolase domain containing 17A [Source:MGI Symbol;Acc:MGI:106388]	497	489	692	509	561	722	544	668	764	ENSG00000040275	54908	SPDL1	spindle apparatus coiled-coil protein 1 [Source:HGNC Symbol;Acc:HGNC:26010]	202	254	83	154	216	239	244	331	215	212	163	185	114	153
ENSMUSG00000003348	208228	Mob3a	MOB kinase activator 3A [Source:MGI Symbol;Acc:MGI:3050117]	276	329	358	224	309	384	350	320	378	ENSG00000040341	27067	STAU2	staufen double-stranded RNA binding protein 2 [Source:HGNC Symbol;Acc:HGNC:11371]	373	468	200	309	622	598	501	647	575	599	481	645	554	592
ENSMUSG00000003352	12297	Cacnb3	calcium channel, voltage-dependent, beta 3 subunit [Source:MGI Symbol;Acc:MGI:103307]	269	244	269	193	230	278	291	250	257	ENSG00000040487	54896	SLC66A1	solute carrier family 66 member 1 [Source:HGNC Symbol;Acc:HGNC:26001]	40	48	30	36	49	44	29	43	46	38	33	44	47	44
ENSMUSG00000003354	105833	Ccdc65	coiled-coil domain containing 65 [Source:MGI Symbol;Acc:MGI:2146001]	8	6	16	11	6	9	7	7	6	ENSG00000040531	1497	CTNS	cystinosin, lysosomal cystine transporter [Source:HGNC Symbol;Acc:HGNC:2518]	73	100	84	115	85	101	73	127	107	92	48	65	63	89
ENSMUSG00000003355	66120	Fkbp11	FK506 binding protein 11 [Source:MGI Symbol;Acc:MGI:1913370]	31	25	72	44	47	53	85	44	59	ENSG00000040608	65078	RTN4R	reticulon 4 receptor [Source:HGNC Symbol;Acc:HGNC:18601]	38	42	21	28	106	135	116	143	72	92	63	80	128	126
ENSMUSG00000003360	74351	Ddx23	DEAD (Asp-Glu-Ala-Asp) box polypeptide 23 [Source:MGI Symbol;Acc:MGI:1921601]	1854	1585	2306	1642	1871	2283	1566	1892	2191	ENSG00000040633	79142	PHF23	PHD finger protein 23 [Source:HGNC Symbol;Acc:HGNC:28428]	208	235	159	244	185	201	212	299	231	218	136	164	158	193
ENSMUSG00000003363	18807	Pld3	phospholipase D family, member 3 [Source:MGI Symbol;Acc:MGI:1333782]	134	121	212	107	120	179	237	162	188	ENSG00000040731	1008	CDH10	cadherin 10 [Source:HGNC Symbol;Acc:HGNC:1749]	82	81	12	17	39	40	75	105	123	103	69	51	38	44
ENSMUSG00000003378	14809	Grik5	glutamate receptor, ionotropic, kainate 5 (gamma 2) [Source:MGI Symbol;Acc:MGI:95818]	747	649	802	663	680	837	789	814	737	ENSG00000040933	3631	INPP4A	inositol polyphosphate-4-phosphatase type I A [Source:HGNC Symbol;Acc:HGNC:6074]	361	432	211	290	435	460	424	526	441	435	323	359	401	417
ENSMUSG00000003379	12518	Cd79a	CD79A antigen (immunoglobulin-associated alpha) [Source:MGI Symbol;Acc:MGI:101774]	1	1	1	1	0	1	0	0	4	ENSG00000041353	5874	RAB27B	RAB27B, member RAS oncogene family [Source:HGNC Symbol;Acc:HGNC:9767]	11	18	2	3	11	8	10	9	6	13	4	2	8	1
ENSMUSG00000003380	14470	Rabac1	Rab acceptor 1 (prenylated) [Source:MGI Symbol;Acc:MGI:1201692]	75	67	119	54	49	89	102	119	120	ENSG00000041357	5685	PSMA4	proteasome subunit alpha 4 [Source:HGNC Symbol;Acc:HGNC:9533]	566	663	292	501	505	612	647	836	497	520	412	463	418	439
ENSMUSG00000003382	27049	Etv3	ets variant 3 [Source:MGI Symbol;Acc:MGI:1350926]	476	370	580	391	431	521	451	446	529	ENSG00000041515	23026	MYO16	myosin XVI [Source:HGNC Symbol;Acc:HGNC:29822]	66	80	17	24	639	642	178	259	157	129	113	124	105	110
ENSMUSG00000003402	19089	Prkcsh	protein kinase C substrate 80K-H [Source:MGI Symbol;Acc:MGI:107877]	935	875	1137	888	1070	1231	1139	1141	1477	ENSG00000041802	55341	LSG1	large 60S subunit nuclear export GTPase 1 [Source:HGNC Symbol;Acc:HGNC:25652]	223	257	181	245	196	225	226	289	220	182	140	159	149	186
ENSMUSG00000003410	15571	Elavl3	ELAV like RNA binding protein 3 [Source:MGI Symbol;Acc:MGI:109157]	229	190	153	118	120	176	140	115	77	ENSG00000041880	10039	PARP3	poly(ADP-ribose) polymerase family member 3 [Source:HGNC Symbol;Acc:HGNC:273]	13	22	26	41	13	19	9	14	10	16	13	8	5	4
ENSMUSG00000003411	69908	Rab3b	RAB3B, member RAS oncogene family [Source:MGI Symbol;Acc:MGI:1917158]	34	26	23	37	21	25	30	55	47	ENSG00000041982	3371	TNC	tenascin C [Source:HGNC Symbol;Acc:HGNC:5318]	1071	1371	2883	4438	37	33	9579	13483	2555	2654	871	939	262	323
ENSMUSG00000003418	241230	St8sia6	ST8 alpha-N-acetyl-neuraminide alpha-2,8-sialyltransferase 6 [Source:MGI Symbol;Acc:MGI:2386797]	160	95	185	125	128	191	184	196	181	ENSG00000041988	90326	THAP3	THAP domain containing 3 [Source:HGNC Symbol;Acc:HGNC:20855]	75	30	68	100	96	72	62	126	87	89	63	69	123	135
ENSMUSG00000003420	14132	Fcgrt	Fc receptor, IgG, alpha chain transporter [Source:MGI Symbol;Acc:MGI:103017]	14	9	13	9	9	16	18	4	10	ENSG00000042062	140876	RIPOR3	RIPOR family member 3 [Source:HGNC Symbol;Acc:HGNC:16168]	6	15	17	32	18	27	13	21	23	19	24	23	17	23
ENSMUSG00000003421	66394	Nosip	nitric oxide synthase interacting protein [Source:MGI Symbol;Acc:MGI:1913644]	358	332	486	365	390	554	401	501	553	ENSG00000042088	55775	TDP1	tyrosyl-DNA phosphodiesterase 1 [Source:HGNC Symbol;Acc:HGNC:18884]	161	196	87	122	257	260	260	348	271	259	221	281	238	269
ENSMUSG00000003423	68845	Pih1d1	PIH1 domain containing 1 [Source:MGI Symbol;Acc:MGI:1916095]	188	170	243	195	218	232	233	250	288	ENSG00000042286	84883	AIFM2	apoptosis inducing factor mitochondria associated 2 [Source:HGNC Symbol;Acc:HGNC:21411]	32	46	10	21	53	44	47	61	52	55	35	44	23	25
ENSMUSG00000003429	27207	Rps11	ribosomal protein S11 [Source:MGI Symbol;Acc:MGI:1351329]	3222	2797	4000	3149	3621	4134	3845	4225	4949	ENSG00000042304	56918	C2orf83	chromosome 2 open reading frame 83 [Source:HGNC Symbol;Acc:HGNC:25344]	0	0	0	0	0	0	0	0	2	2	0	0	1	1
ENSMUSG00000003435	20924	Supt5	suppressor of Ty 5, DSIF elongation factor subunit [Source:MGI Symbol;Acc:MGI:1202400]	2027	1776	2456	1848	2116	2549	2100	2343	2714	ENSG00000042317	55812	SPATA7	spermatogenesis associated 7 [Source:HGNC Symbol;Acc:HGNC:20423]	34	30	28	32	78	89	48	67	45	60	53	64	52	50
ENSMUSG00000003436	13389	Dll3	delta like canonical Notch ligand 3 [Source:MGI Symbol;Acc:MGI:1096877]	28	40	42	13	16	45	11	19	19	ENSG00000042429	9440	MED17	mediator complex subunit 17 [Source:HGNC Symbol;Acc:HGNC:2375]	279	311	137	225	394	423	359	449	311	335	291	309	318	330
ENSMUSG00000003437	54624	Paf1	Paf1, RNA polymerase II complex component [Source:MGI Symbol;Acc:MGI:1923988]	568	465	715	557	653	665	503	595	722	ENSG00000042445	54884	RETSAT	retinol saturase [Source:HGNC Symbol;Acc:HGNC:25991]	81	74	106	125	81	102	91	102	92	72	76	76	82	99
ENSMUSG00000003438	66525	Timm50	translocase of inner mitochondrial membrane 50 [Source:MGI Symbol;Acc:MGI:1913775]	460	328	638	397	480	599	435	487	623	ENSG00000042493	822	CAPG	capping actin protein, gelsolin like [Source:HGNC Symbol;Acc:HGNC:1474]	0	0	18	26	0	1	1	4	1	5	1	3	7	5
ENSMUSG00000003444	67224	Med29	mediator complex subunit 29 [Source:MGI Symbol;Acc:MGI:1914474]	270	239	412	250	292	438	237	357	373	ENSG00000042753	1175	AP2S1	adaptor related protein complex 2 subunit sigma 1 [Source:HGNC Symbol;Acc:HGNC:565]	250	344	344	514	185	205	303	391	247	240	168	160	169	141
ENSMUSG00000003452	12121	Bicd1	BICD cargo adaptor 1 [Source:MGI Symbol;Acc:MGI:1101760]	481	394	506	433	457	461	474	474	493	ENSG00000042781	7399	USH2A	usherin [Source:HGNC Symbol;Acc:HGNC:12601]	28	24	5	11	20	19	27	27	37	41	27	27	31	41
ENSMUSG00000003458	59287	Ncstn	nicastrin [Source:MGI Symbol;Acc:MGI:1891700]	715	667	846	690	722	993	933	924	1083	ENSG00000042813	11055	ZPBP	zona pellucida binding protein [Source:HGNC Symbol;Acc:HGNC:15662]	0	0	0	0	0	0	0	0	0	0	0	0	0	0
ENSMUSG00000003464	19298	Pex19	peroxisomal biogenesis factor 19 [Source:MGI Symbol;Acc:MGI:1334458]	738	554	894	644	719	903	863	801	970	ENSG00000042832	7038	TG	thyroglobulin [Source:HGNC Symbol;Acc:HGNC:11764]	4	7	18	33	0	0	47	68	3	3	0	1	3	2
ENSMUSG00000003469	105653	Phyhip	phytanoyl-CoA hydroxylase interacting protein [Source:MGI Symbol;Acc:MGI:1860417]	10	16	27	20	33	28	21	25	14	ENSG00000042980	10863	ADAM28	ADAM metallopeptidase domain 28 [Source:HGNC Symbol;Acc:HGNC:206]	5	2	1	2	1	1	37	31	3	3	3	7	5	2
ENSMUSG00000003476	12922	Crhr2	corticotropin releasing hormone receptor 2 [Source:MGI Symbol;Acc:MGI:894312]	7	5	13	8	4	10	5	10	6	ENSG00000043039	8538	BARX2	BARX homeobox 2 [Source:HGNC Symbol;Acc:HGNC:956]	0	1	1	4	1	1	7	6	5	2	0	0	1	0
ENSMUSG00000003477	21743	Inmt	indolethylamine N-methyltransferase [Source:MGI Symbol;Acc:MGI:102963]	28	39	31	11	22	15	27	18	20	ENSG00000043093	54165	DCUN1D1	defective in cullin neddylation 1 domain containing 1 [Source:HGNC Symbol;Acc:HGNC:18184]	364	368	237	344	395	398	386	523	345	325	288	335	303	351
ENSMUSG00000003484	72054	Cyp4f18	cytochrome P450, family 4, subfamily f, polypeptide 18 [Source:MGI Symbol;Acc:MGI:1919304]	1	0	0	1	0	0	0	1	0	ENSG00000043143	23338	JADE2	jade family PHD finger 2 [Source:HGNC Symbol;Acc:HGNC:22984]	38	40	61	98	16	13	10	13	33	28	13	19	46	63
ENSMUSG00000003500	23917	Impdh1	inosine monophosphate dehydrogenase 1 [Source:MGI Symbol;Acc:MGI:96567]	268	244	433	305	395	427	329	409	435	ENSG00000043355	7546	ZIC2	Zic family member 2 [Source:HGNC Symbol;Acc:HGNC:12873]	977	1122	16	17	36	32	487	689	1019	1041	171	191	1109	1259
ENSMUSG00000003505	26438	Psg18	pregnancy specific glycoprotein 18 [Source:MGI Symbol;Acc:MGI:1347251]	1	0	0	0	0	0	0	1	0	ENSG00000043462	3937	LCP2	lymphocyte cytosolic protein 2 [Source:HGNC Symbol;Acc:HGNC:6529]	1	1	0	0	2	1	3	4	5	2	4	3	0	1
ENSMUSG00000003518	72349	Dusp3	dual specificity phosphatase 3 (vaccinia virus phosphatase VH1-related) [Source:MGI Symbol;Acc:MGI:1919599]	178	174	251	178	207	258	370	258	238	ENSG00000043514	54802	TRIT1	tRNA isopentenyltransferase 1 [Source:HGNC Symbol;Acc:HGNC:20286]	87	118	51	56	147	196	142	146	180	150	133	163	166	207
ENSMUSG00000003526	19125	Prodh	proline dehydrogenase [Source:MGI Symbol;Acc:MGI:97770]	175	167	224	201	201	229	217	221	243	ENSG00000043591	153	ADRB1	adrenoceptor beta 1 [Source:HGNC Symbol;Acc:HGNC:285]	1	1	0	0	0	2	3	0	0	3	2	1	0	0
ENSMUSG00000003527	27886	Ess2	ess-2 splicing factor [Source:MGI Symbol;Acc:MGI:107854]	393	309	440	291	346	468	348	433	455	ENSG00000044012	2981	GUCA2B	guanylate cyclase activator 2B [Source:HGNC Symbol;Acc:HGNC:4683]	0	0	0	0	0	0	0	0	0	0	0	0	0	0
ENSMUSG00000003528	13358	Slc25a1	solute carrier family 25 (mitochondrial carrier, citrate transporter), member 1 [Source:MGI Symbol;Acc:MGI:1345283]	437	414	624	446	560	625	856	743	844	ENSG00000044090	9820	CUL7	cullin 7 [Source:HGNC Symbol;Acc:HGNC:21024]	190	304	418	667	391	346	414	618	345	327	250	357	343	399
ENSMUSG00000003531	13353	Dgcr6	DiGeorge syndrome critical region gene 6 [Source:MGI Symbol;Acc:MGI:1202877]	263	247	366	304	261	410	295	362	384	ENSG00000044115	1495	CTNNA1	catenin alpha 1 [Source:HGNC Symbol;Acc:HGNC:2509]	2057	2271	1910	3054	1798	1983	2486	3335	2292	2200	1620	1858	1690	1800
ENSMUSG00000003534	12305	Ddr1	discoidin domain receptor family, member 1 [Source:MGI Symbol;Acc:MGI:99216]	871	803	1023	753	818	1118	781	860	999	ENSG00000044446	5256	PHKA2	phosphorylase kinase regulatory subunit alpha 2 [Source:HGNC Symbol;Acc:HGNC:8926]	134	164	83	118	126	121	115	135	128	126	99	115	121	127
ENSMUSG00000003541	15937	Ier3	immediate early response 3 [Source:MGI Symbol;Acc:MGI:104814]	13	11	19	12	14	25	468	156	177	ENSG00000044459	54875	CNTLN	centlein [Source:HGNC Symbol;Acc:HGNC:23432]	190	233	95	170	173	212	232	290	212	180	164	171	111	125
ENSMUSG00000003545	14282	Fosb	FBJ osteosarcoma oncogene B [Source:MGI Symbol;Acc:MGI:95575]	11	21	43	6	37	28	7	16	11	ENSG00000044524	2042	EPHA3	EPH receptor A3 [Source:HGNC Symbol;Acc:HGNC:3387]	93	112	275	428	1083	1150	1424	1911	882	777	732	892	1376	1575
ENSMUSG00000003546	74764	Klc4	kinesin light chain 4 [Source:MGI Symbol;Acc:MGI:1922014]	169	116	186	137	145	192	188	153	177	ENSG00000044574	3309	HSPA5	heat shock protein family A (Hsp70) member 5 [Source:HGNC Symbol;Acc:HGNC:5238]	2103	2396	3920	6144	1989	2173	2434	2824	2511	2545	1357	1596	1017	1082
ENSMUSG00000003549	13870	Ercc1	excision repair cross-complementing rodent repair deficiency, complementation group 1 [Source:MGI Symbol;Acc:MGI:95412]	181	172	270	170	187	201	203	222	292	ENSG00000046604	1829	DSG2	desmoglein 2 [Source:HGNC Symbol;Acc:HGNC:3049]	9	16	381	603	81	72	50	73	125	92	49	47	232	273
ENSMUSG00000003555	13074	Cyp17a1	cytochrome P450, family 17, subfamily a, polypeptide 1 [Source:MGI Symbol;Acc:MGI:88586]	0	0	1	4	0	1	0	0	0	ENSG00000046647	54960	GEMIN8	gem nuclear organelle associated protein 8 [Source:HGNC Symbol;Acc:HGNC:26044]	42	57	45	58	55	47	75	100	46	53	40	45	53	64
ENSMUSG00000003559	57344	As3mt	arsenic (+3 oxidation state) methyltransferase [Source:MGI Symbol;Acc:MGI:1929882]	194	140	208	141	187	162	185	182	213	ENSG00000046651	8481	OFD1	OFD1 centriole and centriolar satellite protein [Source:HGNC Symbol;Acc:HGNC:2567]	79	92	65	83	92	106	119	146	144	125	122	141	142	146
ENSMUSG00000003573	26558	Homer3	homer scaffolding protein 3 [Source:MGI Symbol;Acc:MGI:1347359]	827	688	1028	699	816	1177	529	761	884	ENSG00000046653	2824	GPM6B	glycoprotein M6B [Source:HGNC Symbol;Acc:HGNC:4461]	966	1159	24	38	2710	2869	1626	2332	924	952	1090	1248	662	808
ENSMUSG00000003575	382056	Crtc1	CREB regulated transcription coactivator 1 [Source:MGI Symbol;Acc:MGI:2142523]	392	329	441	323	314	420	290	359	369	ENSG00000046774	51438	MAGEC2	MAGE family member C2 [Source:HGNC Symbol;Acc:HGNC:13574]	1	1	0	1	0	0	0	0	0	1	0	1	0	0
ENSMUSG00000003581	71673	Rnf215	ring finger protein 215 [Source:MGI Symbol;Acc:MGI:1918923]	64	82	94	69	81	119	96	88	109	ENSG00000046889	80243	PREX2	phosphatidylinositol-3,4,5-trisphosphate dependent Rac exchange factor 2 [Source:HGNC Symbol;Acc:HGNC:22950]	564	697	33	53	520	514	514	697	1069	946	612	635	513	612
ENSMUSG00000003585	67815	Sec14l2	SEC14-like lipid binding 2 [Source:MGI Symbol;Acc:MGI:1915065]	58	36	57	52	50	53	28	41	37	ENSG00000047056	22884	WDR37	WD repeat domain 37 [Source:HGNC Symbol;Acc:HGNC:31406]	164	192	134	255	200	213	178	262	195	188	152	194	161	183
ENSMUSG00000003604	74268	Aven	apoptosis, caspase activation inhibitor [Source:MGI Symbol;Acc:MGI:1921518]	163	146	226	215	224	240	134	177	232	ENSG00000047188	64848	YTHDC2	YTH domain containing 2 [Source:HGNC Symbol;Acc:HGNC:24721]	299	315	158	288	298	341	297	364	292	289	287	294	182	222
ENSMUSG00000003617	12870	Cp	ceruloplasmin [Source:MGI Symbol;Acc:MGI:88476]	175	80	136	116	95	169	202	161	205	ENSG00000047230	56474	CTPS2	CTP synthase 2 [Source:HGNC Symbol;Acc:HGNC:2520]	247	273	83	123	438	510	159	204	174	182	170	203	207	245
ENSMUSG00000003623	74114	Crot	carnitine O-octanoyltransferase [Source:MGI Symbol;Acc:MGI:1921364]	287	242	399	258	293	331	237	280	314	ENSG00000047249	51606	ATP6V1H	ATPase H+ transporting V1 subunit H [Source:HGNC Symbol;Acc:HGNC:18303]	121	124	77	125	114	124	109	117	116	112	69	99	73	95
ENSMUSG00000003644	20111	Rps6ka1	ribosomal protein S6 kinase polypeptide 1 [Source:MGI Symbol;Acc:MGI:104558]	673	506	761	589	662	730	678	759	822	ENSG00000047315	5431	POLR2B	RNA polymerase II subunit B [Source:HGNC Symbol;Acc:HGNC:9188]	691	839	553	822	760	838	894	1044	813	772	616	703	647	786
ENSMUSG00000003657	12308	Calb2	calbindin 2 [Source:MGI Symbol;Acc:MGI:101914]	4	5	3	5	3	2	4	8	1	ENSG00000047346	56204	FAM214A	family with sequence similarity 214 member A [Source:HGNC Symbol;Acc:HGNC:25609]	148	145	219	310	295	302	184	298	296	303	290	309	210	228
ENSMUSG00000003660	320632	Snrnp200	small nuclear ribonucleoprotein 200 (U5) [Source:MGI Symbol;Acc:MGI:2444401]	4946	4362	6407	4556	5284	6247	6006	5890	6801	ENSG00000047365	116984	ARAP2	ArfGAP with RhoGAP domain, ankyrin repeat and PH domain 2 [Source:HGNC Symbol;Acc:HGNC:16924]	61	53	17	20	23	24	72	114	42	41	33	35	35	32
ENSMUSG00000003662	26371	Ciao1	cytosolic iron-sulfur protein assembly 1 [Source:MGI Symbol;Acc:MGI:1346998]	279	247	361	268	283	338	333	325	385	ENSG00000047410	7175	TPR	translocated promoter region, nuclear basket protein [Source:HGNC Symbol;Acc:HGNC:12017]	1078	1299	819	1194	1322	1431	1300	1617	1197	1167	1000	1227	1588	1813
ENSMUSG00000003665	15116	Has1	hyaluronan synthase 1 [Source:MGI Symbol;Acc:MGI:106590]	94	84	92	54	96	66	79	83	49	ENSG00000047457	1356	CP	ceruloplasmin [Source:HGNC Symbol;Acc:HGNC:2295]	3	3	3	3	145	132	18	28	99	113	151	171	29	44
ENSMUSG00000003680	225895	Taf6l	TATA-box binding protein associated factor 6 like [Source:MGI Symbol;Acc:MGI:2444957]	259	312	399	250	295	331	266	335	401	ENSG00000047578	23247	KIAA0556	KIAA0556 [Source:HGNC Symbol;Acc:HGNC:29068]	97	125	118	189	178	188	171	226	158	148	143	131	164	190
ENSMUSG00000003721	72999	Insig2	insulin induced gene 2 [Source:MGI Symbol;Acc:MGI:1920249]	139	124	171	126	125	120	184	157	169	ENSG00000047579	84062	DTNBP1	dystrobrevin binding protein 1 [Source:HGNC Symbol;Acc:HGNC:17328]	14	23	37	46	39	31	28	34	47	48	31	32	42	49
ENSMUSG00000003731	16650	Kpna6	karyopherin (importin) alpha 6 [Source:MGI Symbol;Acc:MGI:1100836]	890	776	1156	976	1081	1128	945	1056	1195	ENSG00000047597	7504	XK	X-linked Kx blood group [Source:HGNC Symbol;Acc:HGNC:12811]	0	5	1	1	0	0	3	3	9	6	2	1	18	20
ENSMUSG00000003746	17155	Man1a	mannosidase 1, alpha [Source:MGI Symbol;Acc:MGI:104677]	77	83	74	62	89	89	180	98	144	ENSG00000047617	57101	ANO2	anoctamin 2 [Source:HGNC Symbol;Acc:HGNC:1183]	26	27	1	2	3	0	13	17	13	14	16	13	11	9
ENSMUSG00000003752	233011	Itpkc	inositol 1,4,5-trisphosphate 3-kinase C [Source:MGI Symbol;Acc:MGI:2442554]	142	119	120	116	154	152	136	132	189	ENSG00000047621	57102	C12orf4	chromosome 12 open reading frame 4 [Source:HGNC Symbol;Acc:HGNC:1184]	244	245	168	245	143	158	141	201	169	181	103	133	86	101
ENSMUSG00000003762	76889	Coq8b	coenzyme Q8B [Source:MGI Symbol;Acc:MGI:1924139]	173	206	242	164	216	220	311	297	325	ENSG00000047634	6322	SCML1	Scm polycomb group protein like 1 [Source:HGNC Symbol;Acc:HGNC:10580]	140	172	84	136	272	282	219	361	180	151	201	246	103	103
ENSMUSG00000003778	78656	Brd8	bromodomain containing 8 [Source:MGI Symbol;Acc:MGI:1925906]	1643	1536	1675	1432	1599	1656	1902	1786	1714	ENSG00000047644	55841	WWC3	WWC family member 3 [Source:HGNC Symbol;Acc:HGNC:29237]	649	747	565	922	630	629	511	632	549	558	447	525	399	444
ENSMUSG00000003779	19348	Kif20a	kinesin family member 20A [Source:MGI Symbol;Acc:MGI:1201682]	2111	1811	2788	1835	2169	2624	1939	2337	2840	ENSG00000047648	395	ARHGAP6	Rho GTPase activating protein 6 [Source:HGNC Symbol;Acc:HGNC:676]	67	63	75	105	53	54	89	115	65	42	52	56	34	25
ENSMUSG00000003808	66590	Farsa	phenylalanyl-tRNA synthetase, alpha subunit [Source:MGI Symbol;Acc:MGI:1913840]	582	495	898	585	626	775	504	725	770	ENSG00000047662	27146	FAM184B	family with sequence similarity 184 member B [Source:HGNC Symbol;Acc:HGNC:29235]	3	5	42	67	4	3	3	4	2	1	3	4	1	7
ENSMUSG00000003809	270076	Gcdh	glutaryl-Coenzyme A dehydrogenase [Source:MGI Symbol;Acc:MGI:104541]	318	264	379	216	241	301	286	319	300	ENSG00000047849	4134	MAP4	microtubule associated protein 4 [Source:HGNC Symbol;Acc:HGNC:6862]	2860	3219	3187	5075	2449	2636	2807	3915	3011	2954	2018	2395	1943	2219
ENSMUSG00000003810	17776	Mast2	microtubule associated serine/threonine kinase 2 [Source:MGI Symbol;Acc:MGI:894676]	1391	1241	1711	1302	1407	1714	1415	1661	1675	ENSG00000047932	57120	GOPC	golgi associated PDZ and coiled-coil motif containing [Source:HGNC Symbol;Acc:HGNC:17643]	165	182	263	368	322	315	249	308	146	132	174	208	204	183
ENSMUSG00000003812	13423	Dnase2a	deoxyribonuclease II alpha [Source:MGI Symbol;Acc:MGI:1329019]	56	34	51	37	40	49	61	44	32	ENSG00000047936	6098	ROS1	ROS proto-oncogene 1, receptor tyrosine kinase [Source:HGNC Symbol;Acc:HGNC:10261]	0	0	0	1	0	0	2	0	1	0	0	0	0	1
ENSMUSG00000003813	19358	Rad23a	RAD23 homolog A, nucleotide excision repair protein [Source:MGI Symbol;Acc:MGI:105126]	440	375	626	454	462	562	584	564	636	ENSG00000048028	57646	USP28	ubiquitin specific peptidase 28 [Source:HGNC Symbol;Acc:HGNC:12625]	177	241	178	221	249	300	332	458	247	253	215	251	223	283
ENSMUSG00000003814	12317	Calr	calreticulin [Source:MGI Symbol;Acc:MGI:88252]	4680	4167	6943	4785	5810	6767	5518	5810	7273	ENSG00000048052	9734	HDAC9	histone deacetylase 9 [Source:HGNC Symbol;Acc:HGNC:14065]	73	100	61	119	251	274	280	395	455	436	420	436	356	395
ENSMUSG00000003824	71846	Syce2	synaptonemal complex central element protein 2 [Source:MGI Symbol;Acc:MGI:1919096]	118	100	156	124	107	147	303	255	271	ENSG00000048140	26262	TSPAN17	tetraspanin 17 [Source:HGNC Symbol;Acc:HGNC:13594]	131	155	141	204	177	177	146	149	186	182	110	129	125	118
ENSMUSG00000003847	54446	Nfat5	nuclear factor of activated T cells 5 [Source:MGI Symbol;Acc:MGI:1859333]	1581	1495	1702	1504	1531	1528	2753	2481	2391	ENSG00000048162	51491	NOP16	NOP16 nucleolar protein [Source:HGNC Symbol;Acc:HGNC:26934]	73	98	35	66	66	68	69	92	64	76	57	65	73	78
ENSMUSG00000003848	67619	Nob1	NIN1/RPN12 binding protein 1 homolog [Source:MGI Symbol;Acc:MGI:1914869]	500	467	777	573	623	732	565	622	809	ENSG00000048342	57545	CC2D2A	coiled-coil and C2 domain containing 2A [Source:HGNC Symbol;Acc:HGNC:29253]	162	222	97	130	167	180	132	176	167	153	145	150	142	144
ENSMUSG00000003849	18104	Nqo1	NAD(P)H dehydrogenase, quinone 1 [Source:MGI Symbol;Acc:MGI:103187]	25	28	20	23	26	39	23	32	31	ENSG00000048392	50484	RRM2B	ribonucleotide reductase regulatory TP53 inducible subunit M2B [Source:HGNC Symbol;Acc:HGNC:17296]	181	231	140	188	373	382	246	319	209	234	186	214	136	131
ENSMUSG00000003863	76787	Ppfia3	protein tyrosine phosphatase, receptor type, f polypeptide (PTPRF), interacting protein (liprin), alpha 3 [Source:MGI Symbol;Acc:MGI:1924037]	91	67	103	69	81	83	75	85	72	ENSG00000048405	168850	ZNF800	zinc finger protein 800 [Source:HGNC Symbol;Acc:HGNC:27267]	213	274	181	271	315	353	264	356	250	255	220	243	213	213
ENSMUSG00000003865	14936	Gys1	glycogen synthase 1, muscle [Source:MGI Symbol;Acc:MGI:101805]	624	568	783	530	594	749	2668	1341	1288	ENSG00000048462	608	TNFRSF17	TNF receptor superfamily member 17 [Source:HGNC Symbol;Acc:HGNC:11913]	1	2	0	1	0	0	0	1	0	1	2	0	5	6
ENSMUSG00000003868	20174	Ruvbl2	RuvB-like protein 2 [Source:MGI Symbol;Acc:MGI:1342299]	1466	1165	1900	1414	1511	1938	1943	2003	2437	ENSG00000048471	92017	SNX29	sorting nexin 29 [Source:HGNC Symbol;Acc:HGNC:30542]	135	160	170	318	177	180	189	238	184	162	137	179	130	158
ENSMUSG00000003872	22342	Lin7b	lin-7 homolog B (C. elegans) [Source:MGI Symbol;Acc:MGI:1330858]	3	4	9	2	3	5	3	2	2	ENSG00000048540	55885	LMO3	LIM domain only 3 [Source:HGNC Symbol;Acc:HGNC:6643]	10	10	53	72	35	37	177	270	151	117	217	214	150	166
ENSMUSG00000003873	12028	Bax	BCL2-associated X protein [Source:MGI Symbol;Acc:MGI:99702]	372	331	577	368	392	522	455	559	645	ENSG00000048544	55173	MRPS10	mitochondrial ribosomal protein S10 [Source:HGNC Symbol;Acc:HGNC:14502]	93	123	77	110	101	118	90	123	106	103	76	91	79	90
ENSMUSG00000003882	16197	Il7r	interleukin 7 receptor [Source:MGI Symbol;Acc:MGI:96562]	0	3	1	0	5	0	0	0	0	ENSG00000048545	2978	GUCA1A	guanylate cyclase activator 1A [Source:HGNC Symbol;Acc:HGNC:4678]	2	1	2	7	0	2	3	1	3	1	1	0	25	34
ENSMUSG00000003923	21780	Tfam	transcription factor A, mitochondrial [Source:MGI Symbol;Acc:MGI:107810]	601	526	846	537	699	822	731	730	921	ENSG00000048649	51773	RSF1	remodeling and spacing factor 1 [Source:HGNC Symbol;Acc:HGNC:18118]	755	824	603	892	848	933	968	1277	1156	1131	901	1029	1013	1057
ENSMUSG00000003929	224694	Zfp81	zinc finger protein 81 [Source:MGI Symbol;Acc:MGI:1890752]	390	390	520	377	350	502	497	490	506	ENSG00000048707	55187	VPS13D	vacuolar protein sorting 13 homolog D [Source:HGNC Symbol;Acc:HGNC:23595]	786	957	841	1361	980	1091	805	1074	850	878	632	740	849	956
ENSMUSG00000003934	13643	Efnb3	ephrin B3 [Source:MGI Symbol;Acc:MGI:109196]	430	359	456	261	361	476	587	461	498	ENSG00000048740	10659	CELF2	CUGBP Elav-like family member 2 [Source:HGNC Symbol;Acc:HGNC:2550]	1236	1342	301	522	451	469	796	1223	1160	1145	707	730	402	429
ENSMUSG00000003948	67468	Mmd	monocyte to macrophage differentiation-associated [Source:MGI Symbol;Acc:MGI:1914718]	490	555	696	519	568	750	628	735	736	ENSG00000048828	23196	FAM120A	family with sequence similarity 120A [Source:HGNC Symbol;Acc:HGNC:13247]	605	801	857	1383	587	603	647	932	534	501	401	398	327	404
ENSMUSG00000003949	217082	Hlf	hepatic leukemia factor [Source:MGI Symbol;Acc:MGI:96108]	17	14	28	15	25	16	42	37	27	ENSG00000048991	23518	R3HDM1	R3H domain containing 1 [Source:HGNC Symbol;Acc:HGNC:9757]	455	493	329	491	660	729	670	1011	620	602	443	495	586	628
ENSMUSG00000003955	70186	Fam162a	family with sequence similarity 162, member A [Source:MGI Symbol;Acc:MGI:1917436]	538	472	734	538	581	743	1747	1478	1570	ENSG00000049089	1298	COL9A2	collagen type IX alpha 2 chain [Source:HGNC Symbol;Acc:HGNC:2218]	8	11	2	4	2	8	12	16	13	15	20	25	16	17
ENSMUSG00000003970	26961	Rpl8	ribosomal protein L8 [Source:MGI Symbol;Acc:MGI:1350927]	6712	5954	9774	6737	7651	9681	8687	9075	11826	ENSG00000049130	4254	KITLG	KIT ligand [Source:HGNC Symbol;Acc:HGNC:6343]	109	150	122	201	443	447	379	483	468	444	244	242	126	179
ENSMUSG00000003974	108069	Grm3	glutamate receptor, metabotropic 3 [Source:MGI Symbol;Acc:MGI:1351340]	0	1	0	1	0	1	1	0	9	ENSG00000049167	1161	ERCC8	ERCC excision repair 8, CSA ubiquitin ligase complex subunit [Source:HGNC Symbol;Acc:HGNC:3439]	90	98	47	75	86	128	105	128	115	106	71	101	85	104
ENSMUSG00000003992	66970	Ssbp2	single-stranded DNA binding protein 2 [Source:MGI Symbol;Acc:MGI:1914220]	430	391	476	368	360	444	613	477	549	ENSG00000049192	11174	ADAMTS6	ADAM metallopeptidase with thrombospondin type 1 motif 6 [Source:HGNC Symbol;Acc:HGNC:222]	33	54	130	222	75	81	88	124	94	77	90	91	87	87
ENSMUSG00000004018	67030	Fancl	Fanconi anemia, complementation group L [Source:MGI Symbol;Acc:MGI:1914280]	163	129	193	121	155	204	138	161	185	ENSG00000049239	9563	H6PD	hexose-6-phosphate dehydrogenase/glucose 1-dehydrogenase [Source:HGNC Symbol;Acc:HGNC:4795]	416	494	748	1318	655	633	530	709	412	447	413	514	576	660
ENSMUSG00000004031	240843	Brinp2	bone morphogenic protein/retinoic acid inducible neural-specific 2 [Source:MGI Symbol;Acc:MGI:2443333]	19	10	27	4	23	25	18	13	15	ENSG00000049245	9341	VAMP3	vesicle associated membrane protein 3 [Source:HGNC Symbol;Acc:HGNC:12644]	387	477	461	736	232	248	257	353	310	297	202	232	304	369
ENSMUSG00000004032	14866	Gstm5	glutathione S-transferase, mu 5 [Source:MGI Symbol;Acc:MGI:1309466]	425	368	504	340	365	587	475	559	668	ENSG00000049246	8863	PER3	period circadian regulator 3 [Source:HGNC Symbol;Acc:HGNC:8847]	165	155	61	113	121	122	96	150	128	120	115	158	226	260
ENSMUSG00000004035	68312	Gstm7	glutathione S-transferase, mu 7 [Source:MGI Symbol;Acc:MGI:1915562]	20	40	16	15	12	26	22	29	32	ENSG00000049247	10911	UTS2	urotensin 2 [Source:HGNC Symbol;Acc:HGNC:12636]	0	1	0	0	0	0	0	0	0	0	0	0	0	0
ENSMUSG00000004038	14864	Gstm3	glutathione S-transferase, mu 3 [Source:MGI Symbol;Acc:MGI:106026]	0	0	0	0	1	0	0	0	0	ENSG00000049249	3604	TNFRSF9	TNF receptor superfamily member 9 [Source:HGNC Symbol;Acc:HGNC:11924]	2	1	0	2	3	0	4	0	3	5	6	0	6	2
ENSMUSG00000004040	20848	Stat3	signal transducer and activator of transcription 3 [Source:MGI Symbol;Acc:MGI:103038]	183	146	179	103	191	262	227	202	202	ENSG00000049283	55040	EPN3	epsin 3 [Source:HGNC Symbol;Acc:HGNC:18235]	1	5	0	1	3	2	3	1	2	1	0	0	2	1
ENSMUSG00000004043	20850	Stat5a	signal transducer and activator of transcription 5A [Source:MGI Symbol;Acc:MGI:103036]	25	25	28	11	28	29	59	45	35	ENSG00000049323	4052	LTBP1	latent transforming growth factor beta binding protein 1 [Source:HGNC Symbol;Acc:HGNC:6714]	894	1054	1512	2629	488	448	511	738	951	893	617	703	464	513
ENSMUSG00000004044	19285	Cavin1	caveolae associated 1 [Source:MGI Symbol;Acc:MGI:1277968]	137	133	188	137	138	169	301	250	263	ENSG00000049449	5954	RCN1	reticulocalbin 1 [Source:HGNC Symbol;Acc:HGNC:9934]	618	734	1093	1789	863	1019	788	943	674	689	531	617	428	514
ENSMUSG00000004054	26403	Map3k11	mitogen-activated protein kinase kinase kinase 11 [Source:MGI Symbol;Acc:MGI:1346880]	683	574	852	618	611	876	571	714	909	ENSG00000049540	2006	ELN	elastin [Source:HGNC Symbol;Acc:HGNC:3327]	29	31	807	1249	8	8	24	46	28	28	41	47	19	18
ENSMUSG00000004056	11652	Akt2	thymoma viral proto-oncogene 2 [Source:MGI Symbol;Acc:MGI:104874]	984	825	1308	919	974	1283	1059	1060	1357	ENSG00000049541	5982	RFC2	replication factor C subunit 2 [Source:HGNC Symbol;Acc:HGNC:9970]	149	136	66	74	157	175	157	182	125	118	114	101	98	100
ENSMUSG00000004069	83945	Dnaja3	DnaJ heat shock protein family (Hsp40) member A3 [Source:MGI Symbol;Acc:MGI:1933786]	518	478	760	581	645	782	730	718	799	ENSG00000049618	57492	ARID1B	AT-rich interaction domain 1B [Source:HGNC Symbol;Acc:HGNC:18040]	1091	1287	924	1563	1569	1703	1584	2208	1499	1444	1426	1551	1364	1636
ENSMUSG00000004070	15369	Hmox2	heme oxygenase 2 [Source:MGI Symbol;Acc:MGI:109373]	460	358	555	377	411	539	456	474	582	ENSG00000049656	81037	CLPTM1L	CLPTM1 like [Source:HGNC Symbol;Acc:HGNC:24308]	283	361	293	457	373	374	338	484	294	296	227	263	173	202
ENSMUSG00000004071	66626	Cdip1	cell death inducing Trp53 target 1 [Source:MGI Symbol;Acc:MGI:1913876]	847	772	1030	737	900	934	923	877	911	ENSG00000049759	23327	NEDD4L	NEDD4 like E3 ubiquitin protein ligase [Source:HGNC Symbol;Acc:HGNC:7728]	659	783	119	202	323	360	607	741	485	468	421	441	286	341
ENSMUSG00000004085	65964	Map3k20	mitogen-activated protein kinase kinase kinase 20 [Source:MGI Symbol;Acc:MGI:2443258]	469	420	656	503	531	646	692	664	686	ENSG00000049768	50943	FOXP3	forkhead box P3 [Source:HGNC Symbol;Acc:HGNC:6106]	2	5	1	4	7	3	0	4	1	0	2	1	3	2
ENSMUSG00000004096	66070	Cwc15	CWC15 spliceosome-associated protein [Source:MGI Symbol;Acc:MGI:1913320]	726	658	952	720	776	967	701	900	1110	ENSG00000049769	89801	PPP1R3F	protein phosphatase 1 regulatory subunit 3F [Source:HGNC Symbol;Acc:HGNC:14944]	38	61	19	24	51	63	52	78	55	46	36	38	72	83
ENSMUSG00000004098	53867	Col5a3	collagen, type V, alpha 3 [Source:MGI Symbol;Acc:MGI:1858212]	17	8	0	10	6	4	17	7	6	ENSG00000049860	3074	HEXB	hexosaminidase subunit beta [Source:HGNC Symbol;Acc:HGNC:4879]	188	217	300	513	128	173	150	204	190	152	120	129	108	109
ENSMUSG00000004099	13433	Dnmt1	DNA methyltransferase (cytosine-5) 1 [Source:MGI Symbol;Acc:MGI:94912]	4953	4338	6209	4608	5266	6376	5876	6028	6834	ENSG00000049883	79810	PTCD2	pentatricopeptide repeat domain 2 [Source:HGNC Symbol;Acc:HGNC:25734]	122	120	68	80	140	164	153	157	100	128	75	99	142	136
ENSMUSG00000004100	235036	Ppan	peter pan homolog [Source:MGI Symbol;Acc:MGI:2178445]	774	641	983	750	878	943	735	939	1163	ENSG00000050030	340533	NEXMIF	neurite extension and migration factor [Source:HGNC Symbol;Acc:HGNC:29433]	92	89	0	4	21	18	24	39	175	165	10	25	81	94
ENSMUSG00000004105	26360	Angptl2	angiopoietin-like 2 [Source:MGI Symbol;Acc:MGI:1347002]	306	232	284	215	194	238	198	237	260	ENSG00000050130	51528	JKAMP	JNK1/MAPK8 associated membrane protein [Source:HGNC Symbol;Acc:HGNC:20184]	155	172	153	217	243	261	232	254	218	194	166	174	139	180
ENSMUSG00000004110	12290	Cacna1e	calcium channel, voltage-dependent, R type, alpha 1E subunit [Source:MGI Symbol;Acc:MGI:106217]	55	61	28	37	28	23	28	34	27	ENSG00000050165	27122	DKK3	dickkopf WNT signaling pathway inhibitor 3 [Source:HGNC Symbol;Acc:HGNC:2893]	381	465	899	1432	388	421	324	436	541	475	367	434	281	334
ENSMUSG00000004113	12287	Cacna1b	calcium channel, voltage-dependent, N type, alpha 1B subunit [Source:MGI Symbol;Acc:MGI:88296]	103	118	173	127	137	175	137	106	172	ENSG00000050327	7984	ARHGEF5	Rho guanine nucleotide exchange factor 5 [Source:HGNC Symbol;Acc:HGNC:13209]	0	2	11	16	0	4	0	1	9	3	0	2	1	1
ENSMUSG00000004127	108943	Trmt10a	tRNA methyltransferase 10A [Source:MGI Symbol;Acc:MGI:1920421]	249	201	293	238	317	310	208	277	320	ENSG00000050344	9603	NFE2L3	nuclear factor, erythroid 2 like 3 [Source:HGNC Symbol;Acc:HGNC:7783]	77	83	48	88	123	169	133	184	154	151	161	166	130	169
ENSMUSG00000004151	14009	Etv1	ets variant 1 [Source:MGI Symbol;Acc:MGI:99254]	346	296	316	268	323	455	415	362	357	ENSG00000050393	63933	MCUR1	mitochondrial calcium uniporter regulator 1 [Source:HGNC Symbol;Acc:HGNC:21097]	315	334	101	150	315	332	255	317	283	234	201	186	205	247
ENSMUSG00000004187	16581	Kifc2	kinesin family member C2 [Source:MGI Symbol;Acc:MGI:109187]	18	20	27	16	16	10	49	29	35	ENSG00000050405	51474	LIMA1	LIM domain and actin binding 1 [Source:HGNC Symbol;Acc:HGNC:24636]	343	446	1395	2059	307	356	406	543	416	362	294	328	211	231
ENSMUSG00000004207	19156	Psap	prosaposin [Source:MGI Symbol;Acc:MGI:97783]	1246	1040	1511	985	1152	1551	1482	1208	1462	ENSG00000050426	25875	LETMD1	LETM1 domain containing 1 [Source:HGNC Symbol;Acc:HGNC:24241]	26	36	65	137	45	41	108	149	125	99	89	103	68	75
ENSMUSG00000004221	16151	Ikbkg	inhibitor of kappaB kinase gamma [Source:MGI Symbol;Acc:MGI:1338074]	233	222	292	224	229	287	379	322	321	ENSG00000050438	9498	SLC4A8	solute carrier family 4 member 8 [Source:HGNC Symbol;Acc:HGNC:11034]	181	191	42	80	769	774	443	553	574	570	445	492	521	596
ENSMUSG00000004231	18504	Pax2	paired box 2 [Source:MGI Symbol;Acc:MGI:97486]	260	44	178	183	60	151	390	150	216	ENSG00000050555	10319	LAMC3	laminin subunit gamma 3 [Source:HGNC Symbol;Acc:HGNC:6494]	31	45	82	154	2	0	210	278	311	302	23	26	37	48
ENSMUSG00000004233	70560	Wars2	tryptophanyl tRNA synthetase 2 (mitochondrial) [Source:MGI Symbol;Acc:MGI:1917810]	215	149	224	152	182	280	219	258	276	ENSG00000050628	5733	PTGER3	prostaglandin E receptor 3 [Source:HGNC Symbol;Acc:HGNC:9595]	13	10	0	2	1	1	3	3	17	13	9	6	11	8
ENSMUSG00000004263	13498	Atn1	atrophin 1 [Source:MGI Symbol;Acc:MGI:104725]	1924	1576	2221	1682	1688	2296	1759	1835	1921	ENSG00000050730	79931	TNIP3	TNFAIP3 interacting protein 3 [Source:HGNC Symbol;Acc:HGNC:19315]	0	1	4	4	0	0	0	0	2	2	0	0	0	0
ENSMUSG00000004264	12034	Phb2	prohibitin 2 [Source:MGI Symbol;Acc:MGI:102520]	2911	2410	3993	2947	3344	4027	2942	3563	4151	ENSG00000050748	5601	MAPK9	mitogen-activated protein kinase 9 [Source:HGNC Symbol;Acc:HGNC:6886]	300	326	208	347	283	344	344	377	244	267	209	274	187	184
ENSMUSG00000004266	15170	Ptpn6	protein tyrosine phosphatase, non-receptor type 6 [Source:MGI Symbol;Acc:MGI:96055]	22	20	21	24	18	35	29	38	45	ENSG00000050767	91522	COL23A1	collagen type XXIII alpha 1 chain [Source:HGNC Symbol;Acc:HGNC:22990]	185	236	0	1	3	6	18	24	24	17	3	4	5	10
ENSMUSG00000004267	13807	Eno2	enolase 2, gamma neuronal [Source:MGI Symbol;Acc:MGI:95394]	36	13	24	32	23	23	82	40	41	ENSG00000050820	9564	BCAR1	BCAR1 scaffold protein, Cas family member [Source:HGNC Symbol;Acc:HGNC:971]	703	769	613	846	828	803	362	526	685	709	499	654	361	453
ENSMUSG00000004268	14791	Emg1	EMG1 N1-specific pseudouridine methyltransferase [Source:MGI Symbol;Acc:MGI:1315195]	852	751	1114	907	959	1062	789	960	1088	ENSG00000051009	84067	FAM160A2	family with sequence similarity 160 member A2 [Source:HGNC Symbol;Acc:HGNC:25378]	164	193	125	202	159	194	143	183	165	165	118	150	171	192
ENSMUSG00000004270	14792	Lpcat3	lysophosphatidylcholine acyltransferase 3 [Source:MGI Symbol;Acc:MGI:1315211]	320	251	463	291	349	401	422	332	437	ENSG00000051108	9709	HERPUD1	homocysteine inducible ER protein with ubiquitin like domain 1 [Source:HGNC Symbol;Acc:HGNC:13744]	108	129	289	485	113	118	142	183	137	134	96	91	63	55
ENSMUSG00000004285	66144	Atp6v1f	ATPase, H+ transporting, lysosomal V1 subunit F [Source:MGI Symbol;Acc:MGI:1913394]	168	152	251	174	212	303	201	231	295	ENSG00000051128	9454	HOMER3	homer scaffold protein 3 [Source:HGNC Symbol;Acc:HGNC:17514]	216	251	163	241	250	323	207	291	169	141	202	226	145	157
ENSMUSG00000004296	16160	Il12b	interleukin 12b [Source:MGI Symbol;Acc:MGI:96540]	0	0	0	1	0	0	0	2	0	ENSG00000051180	5888	RAD51	RAD51 recombinase [Source:HGNC Symbol;Acc:HGNC:9817]	62	84	16	30	57	76	75	71	39	34	37	44	27	40
ENSMUSG00000004317	12728	Clcn5	chloride channel, voltage-sensitive 5 [Source:MGI Symbol;Acc:MGI:99486]	1489	1196	1748	1222	1489	1692	1819	1573	1834	ENSG00000051341	10721	POLQ	DNA polymerase theta [Source:HGNC Symbol;Acc:HGNC:9186]	320	360	67	126	361	379	328	446	279	253	190	258	158	184
ENSMUSG00000004319	12725	Clcn3	chloride channel, voltage-sensitive 3 [Source:MGI Symbol;Acc:MGI:103555]	997	818	1134	851	1049	1015	2712	1856	1590	ENSG00000051382	5291	PIK3CB	phosphatidylinositol-4,5-bisphosphate 3-kinase catalytic subunit beta [Source:HGNC Symbol;Acc:HGNC:8976]	140	147	66	99	125	157	98	134	179	155	87	136	163	185
ENSMUSG00000004328	53417	Hif3a	hypoxia inducible factor 3, alpha subunit [Source:MGI Symbol;Acc:MGI:1859778]	128	133	149	100	115	167	392	233	185	ENSG00000051523	1535	CYBA	cytochrome b-245 alpha chain [Source:HGNC Symbol;Acc:HGNC:2577]	7	5	5	6	1	5	4	19	20	23	16	16	44	65
ENSMUSG00000004341	75512	Gpx6	glutathione peroxidase 6 [Source:MGI Symbol;Acc:MGI:1922762]	4	2	1	0	5	1	3	1	0	ENSG00000051596	84321	THOC3	THO complex 3 [Source:HGNC Symbol;Acc:HGNC:19072]	210	235	64	72	227	241	162	176	126	128	86	150	108	173
ENSMUSG00000004344	14780	Gpx5	glutathione peroxidase 5 [Source:MGI Symbol;Acc:MGI:104886]	0	0	0	0	0	0	0	4	0	ENSG00000051620	23593	HEBP2	heme binding protein 2 [Source:HGNC Symbol;Acc:HGNC:15716]	159	167	149	224	232	239	161	254	177	205	214	211	140	144
ENSMUSG00000004347	18575	Pde1c	phosphodiesterase 1C [Source:MGI Symbol;Acc:MGI:108413]	121	78	76	78	55	64	146	95	94	ENSG00000051825	10198	MPHOSPH9	M-phase phosphoprotein 9 [Source:HGNC Symbol;Acc:HGNC:7215]	344	437	163	235	427	464	450	550	429	432	362	427	521	569
ENSMUSG00000004356	70683	Utp20	UTP20 small subunit processome component [Source:MGI Symbol;Acc:MGI:1917933]	1873	1588	2575	2131	2426	2522	1842	2436	2900	ENSG00000052126	54477	PLEKHA5	pleckstrin homology domain containing A5 [Source:HGNC Symbol;Acc:HGNC:30036]	324	365	179	285	524	525	335	457	576	580	439	490	622	700
ENSMUSG00000004359	20728	Spic	Spi-C transcription factor (Spi-1/PU.1 related) [Source:MGI Symbol;Acc:MGI:1341168]	0	1	0	0	2	0	0	4	0	ENSG00000052344	5652	PRSS8	serine protease 8 [Source:HGNC Symbol;Acc:HGNC:9491]	1	1	0	5	2	1	0	4	1	1	2	0	26	18
ENSMUSG00000004360	212448	9330159F19Rik	RIKEN cDNA 9330159F19 gene [Source:MGI Symbol;Acc:MGI:3036239]	74	58	74	55	53	69	41	56	44	ENSG00000052723	80143	SIKE1	suppressor of IKBKE 1 [Source:HGNC Symbol;Acc:HGNC:26119]	406	484	302	449	451	435	483	706	477	447	380	383	549	655
ENSMUSG00000004364	26554	Cul3	cullin 3 [Source:MGI Symbol;Acc:MGI:1347360]	2519	2156	3110	2207	2659	3199	2603	2925	3364	ENSG00000052749	23223	RRP12	ribosomal RNA processing 12 homolog [Source:HGNC Symbol;Acc:HGNC:29100]	228	301	123	204	258	301	304	415	193	203	149	173	205	254
ENSMUSG00000004366	20604	Sst	somatostatin [Source:MGI Symbol;Acc:MGI:98326]	0	0	0	3	0	1	6	1	2	ENSG00000052795	57600	FNIP2	folliculin interacting protein 2 [Source:HGNC Symbol;Acc:HGNC:29280]	237	290	100	186	362	430	287	379	311	284	229	282	147	180
ENSMUSG00000004371	16156	Il11	interleukin 11 [Source:MGI Symbol;Acc:MGI:107613]	0	0	1	2	1	0	0	0	1	ENSG00000052802	6307	MSMO1	methylsterol monooxygenase 1 [Source:HGNC Symbol;Acc:HGNC:10545]	614	712	766	1262	903	1027	941	1272	827	878	574	602	370	425
ENSMUSG00000004383	16795	Large1	LARGE xylosyl- and glucuronyltransferase 1 [Source:MGI Symbol;Acc:MGI:1342270]	467	418	581	400	431	493	587	662	698	ENSG00000052841	55761	TTC17	tetratricopeptide repeat domain 17 [Source:HGNC Symbol;Acc:HGNC:25596]	658	740	647	1079	739	780	692	1078	828	848	664	717	1001	1121
ENSMUSG00000004393	52513	Ddx56	DEAD (Asp-Glu-Ala-Asp) box polypeptide 56 [Source:MGI Symbol;Acc:MGI:1277172]	650	582	879	618	735	931	701	754	940	ENSG00000052850	60529	ALX4	ALX homeobox 4 [Source:HGNC Symbol;Acc:HGNC:450]	5	6	60	84	3	7	7	13	60	48	15	18	18	14
ENSMUSG00000004394	103694	Tmed4	transmembrane p24 trafficking protein 4 [Source:MGI Symbol;Acc:MGI:1915070]	477	364	566	446	455	633	620	533	690	ENSG00000053108	23105	FSTL4	follistatin like 4 [Source:HGNC Symbol;Acc:HGNC:21389]	3	5	1	2	2	3	7	6	12	17	4	6	9	6
ENSMUSG00000004415	140709	Col26a1	collagen, type XXVI, alpha 1 [Source:MGI Symbol;Acc:MGI:2155345]	477	486	449	297	333	505	679	564	556	ENSG00000053254	1112	FOXN3	forkhead box N3 [Source:HGNC Symbol;Acc:HGNC:1928]	345	441	965	1515	725	735	638	819	803	738	811	923	745	785
ENSMUSG00000004446	12122	Bid	BH3 interacting domain death agonist [Source:MGI Symbol;Acc:MGI:108093]	100	87	122	88	88	115	160	144	126	ENSG00000053328	728464	METTL24	methyltransferase like 24 [Source:HGNC Symbol;Acc:HGNC:21566]	0	1	4	2	0	0	1	2	2	3	1	4	4	7
ENSMUSG00000004451	64143	Ralb	v-ral simian leukemia viral oncogene B [Source:MGI Symbol;Acc:MGI:1927244]	368	347	436	318	357	460	515	452	531	ENSG00000053371	8574	AKR7A2	aldo-keto reductase family 7 member A2 [Source:HGNC Symbol;Acc:HGNC:389]	92	105	68	103	87	131	77	106	83	86	56	80	89	97
ENSMUSG00000004455	19047434233	Ppp1cc	protein phosphatase 1 catalytic subunit gamma [Source:MGI Symbol;Acc:MGI:104872]	5284	4592	7072	5102	5902	7255	6476	6602	7475	ENSG00000053372	51154	MRTO4	MRT4 homolog, ribosome maturation factor [Source:HGNC Symbol;Acc:HGNC:18477]	80	77	27	60	92	88	80	90	67	63	34	32	41	42
ENSMUSG00000004460	67838	Dnajb11	DnaJ heat shock protein family (Hsp40) member B11 [Source:MGI Symbol;Acc:MGI:1915088]	597	584	1012	632	779	976	561	697	896	ENSG00000053438	4826	NNAT	neuronatin [Source:HGNC Symbol;Acc:HGNC:7860]	110	132	10	12	15	10	330	470	471	508	17	19	552	617
ENSMUSG00000004462	70573	Tbccd1	TBCC domain containing 1 [Source:MGI Symbol;Acc:MGI:1917823]	273	257	364	292	281	331	330	298	358	ENSG00000053501	55850	USE1	unconventional SNARE in the ER 1 [Source:HGNC Symbol;Acc:HGNC:30882]	26	25	12	17	18	14	15	14	17	11	13	15	15	15
ENSMUSG00000004473	20256	Clec11a	C-type lectin domain family 11, member a [Source:MGI Symbol;Acc:MGI:1298219]	56	62	56	46	69	61	71	100	78	ENSG00000053524	23101	MCF2L2	MCF.2 cell line derived transforming sequence-like 2 [Source:HGNC Symbol;Acc:HGNC:30319]	14	19	6	12	19	15	27	27	50	40	20	19	76	67
ENSMUSG00000004500	243834	Zfp324	zinc finger protein 324 [Source:MGI Symbol;Acc:MGI:2444641]	245	185	309	195	236	285	250	247	274	ENSG00000053702	83714	NRIP2	nuclear receptor interacting protein 2 [Source:HGNC Symbol;Acc:HGNC:23078]	9	12	10	13	20	20	22	31	16	13	19	21	20	22
ENSMUSG00000004508	14389	Gab2	growth factor receptor bound protein 2-associated protein 2 [Source:MGI Symbol;Acc:MGI:1333854]	185	156	165	117	130	163	234	212	255	ENSG00000053747	3909	LAMA3	laminin subunit alpha 3 [Source:HGNC Symbol;Acc:HGNC:6483]	5	6	12	16	2	1	13	15	7	5	3	2	0	1
ENSMUSG00000004530	23790	Coro1c	coronin, actin binding protein 1C [Source:MGI Symbol;Acc:MGI:1345964]	2878	2364	3403	2635	3038	3641	2751	3231	3793	ENSG00000053770	55745	AP5M1	adaptor related protein complex 5 subunit mu 1 [Source:HGNC Symbol;Acc:HGNC:20192]	327	412	249	396	406	444	443	641	439	377	341	367	339	411
ENSMUSG00000004535	52440	Tax1bp1	Tax1 (human T cell leukemia virus type I) binding protein 1 [Source:MGI Symbol;Acc:MGI:1289308]	1191	1010	1387	1115	1283	1419	1179	1318	1574	ENSG00000053900	29945	ANAPC4	anaphase promoting complex subunit 4 [Source:HGNC Symbol;Acc:HGNC:19990]	108	114	75	102	128	133	137	171	124	112	97	82	126	161
ENSMUSG00000004540	26437	Psg17	pregnancy specific glycoprotein 17 [Source:MGI Symbol;Acc:MGI:1347250]	0	0	0	0	1	0	0	0	0	ENSG00000053918	3784	KCNQ1	potassium voltage-gated channel subfamily Q member 1 [Source:HGNC Symbol;Acc:HGNC:6294]	4	0	1	1	0	0	4	1	3	2	1	1	2	2
ENSMUSG00000004542	26439	Psg19	pregnancy specific glycoprotein 19 [Source:MGI Symbol;Acc:MGI:1347252]	3	0	0	0	1	0	0	0	0	ENSG00000054116	27095	TRAPPC3	trafficking protein particle complex 3 [Source:HGNC Symbol;Acc:HGNC:19942]	101	143	126	165	93	114	124	159	107	107	75	73	141	128
ENSMUSG00000004552	13034	Ctse	cathepsin E [Source:MGI Symbol;Acc:MGI:107361]	0	1	0	0	0	0	0	0	0	ENSG00000054118	9967	THRAP3	thyroid hormone receptor associated protein 3 [Source:HGNC Symbol;Acc:HGNC:22964]	1078	1288	794	1275	1208	1348	1288	1766	1120	1063	882	986	1126	1279
ENSMUSG00000004558	29811	Ndrg2	N-myc downstream regulated gene 2 [Source:MGI Symbol;Acc:MGI:1352498]	53	45	65	33	60	68	144	73	73	ENSG00000054148	29085	PHPT1	phosphohistidine phosphatase 1 [Source:HGNC Symbol;Acc:HGNC:30033]	223	221	156	200	385	382	262	324	258	232	194	247	141	169
ENSMUSG00000004561	52535	Mettl17	methyltransferase like 17 [Source:MGI Symbol;Acc:MGI:1098577]	170	147	242	169	161	216	203	177	212	ENSG00000054179	954	ENTPD2	ectonucleoside triphosphate diphosphohydrolase 2 [Source:HGNC Symbol;Acc:HGNC:3364]	5	0	0	0	3	4	3	9	2	0	1	0	0	0
ENSMUSG00000004562	268739	Arhgef40	Rho guanine nucleotide exchange factor (GEF) 40 [Source:MGI Symbol;Acc:MGI:2685515]	1066	861	1010	686	829	1068	867	871	861	ENSG00000054219	4065	LY75	lymphocyte antigen 75 [Source:HGNC Symbol;Acc:HGNC:6729]	3	0	1	4	1	0	4	0	5	0	0	2	3	2
ENSMUSG00000004565	50767	Pnpla6	patatin-like phospholipase domain containing 6 [Source:MGI Symbol;Acc:MGI:1354723]	255	295	396	252	315	319	444	374	389	ENSG00000054267	51742	ARID4B	AT-rich interaction domain 4B [Source:HGNC Symbol;Acc:HGNC:15550]	333	356	286	423	476	488	436	598	479	433	437	485	731	723
ENSMUSG00000004567	94178	Mcoln1	mucolipin 1 [Source:MGI Symbol;Acc:MGI:1890498]	377	348	396	344	313	381	589	437	437	ENSG00000054277	23596	OPN3	opsin 3 [Source:HGNC Symbol;Acc:HGNC:14007]	94	113	102	166	134	161	356	538	149	139	96	110	283	351
ENSMUSG00000004568	102098	Arhgef18	rho/rac guanine nucleotide exchange factor (GEF) 18 [Source:MGI Symbol;Acc:MGI:2142567]	566	433	664	511	493	631	502	496	595	ENSG00000054282	10806	SDCCAG8	serologically defined colon cancer antigen 8 [Source:HGNC Symbol;Acc:HGNC:10671]	36	44	109	181	92	75	66	86	60	69	74	67	80	107
ENSMUSG00000004591	109333	Pkn2	protein kinase N2 [Source:MGI Symbol;Acc:MGI:109211]	2514	2159	3088	2309	2659	3121	2583	2858	3174	ENSG00000054356	5798	PTPRN	protein tyrosine phosphatase receptor type N [Source:HGNC Symbol;Acc:HGNC:9676]	33	44	31	32	22	19	23	29	48	57	11	19	26	18
ENSMUSG00000004609	12489	Cd33	CD33 antigen [Source:MGI Symbol;Acc:MGI:99440]	4	6	1	3	5	3	2	4	0	ENSG00000054392	55733	HHAT	hedgehog acyltransferase [Source:HGNC Symbol;Acc:HGNC:18270]	33	55	88	108	28	30	57	65	56	33	53	54	40	63
ENSMUSG00000004610	110826	Etfb	electron transferring flavoprotein, beta polypeptide [Source:MGI Symbol;Acc:MGI:106098]	153	167	255	152	178	216	222	234	279	ENSG00000054523	23095	KIF1B	kinesin family member 1B [Source:HGNC Symbol;Acc:HGNC:16636]	1929	2265	620	1041	5431	5807	3896	5161	3973	3753	3712	4109	3803	4523
ENSMUSG00000004612	72310	Nkg7	natural killer cell group 7 sequence [Source:MGI Symbol;Acc:MGI:1931250]	0	0	0	1	0	0	0	0	0	ENSG00000054598	2296	FOXC1	forkhead box C1 [Source:HGNC Symbol;Acc:HGNC:3800]	92	115	319	475	5	4	78	120	261	268	24	27	14	25
ENSMUSG00000004626	20911	Stxbp2	syntaxin binding protein 2 [Source:MGI Symbol;Acc:MGI:107370]	249	195	288	252	257	268	397	343	390	ENSG00000054611	25771	TBC1D22A	TBC1 domain family member 22A [Source:HGNC Symbol;Acc:HGNC:1309]	57	82	129	171	102	57	72	92	88	61	57	78	69	62
ENSMUSG00000004630	18545	Pcp2	Purkinje cell protein 2 (L7) [Source:MGI Symbol;Acc:MGI:97508]	26	12	22	11	8	22	26	10	28	ENSG00000054654	23224	SYNE2	spectrin repeat containing nuclear envelope protein 2 [Source:HGNC Symbol;Acc:HGNC:17084]	1721	2080	620	1121	1834	1930	2036	2692	2758	2627	1723	2011	1588	1754
ENSMUSG00000004631	20392	Sgce	sarcoglycan, epsilon [Source:MGI Symbol;Acc:MGI:1329042]	315	278	307	236	257	283	443	309	334	ENSG00000054690	57475	PLEKHH1	pleckstrin homology, MyTH4 and FERM domain containing H1 [Source:HGNC Symbol;Acc:HGNC:17733]	29	27	1	5	137	124	88	140	136	123	149	179	95	132
ENSMUSG00000004633	69993	Chn2	chimerin 2 [Source:MGI Symbol;Acc:MGI:1917243]	75	75	120	75	114	92	122	114	123	ENSG00000054793	10079	ATP9A	ATPase phospholipid transporting 9A (putative) [Source:HGNC Symbol;Acc:HGNC:13540]	846	1006	531	843	1188	1309	1112	1439	1192	1097	1118	1310	649	779
ENSMUSG00000004637	80707	Wwox	WW domain-containing oxidoreductase [Source:MGI Symbol;Acc:MGI:1931237]	107	85	110	99	99	92	186	163	136	ENSG00000054796	23626	SPO11	SPO11 initiator of meiotic double stranded breaks [Source:HGNC Symbol;Acc:HGNC:11250]	0	0	0	0	0	0	0	0	0	0	1	0	0	0
ENSMUSG00000004642	20492	Slbp	stem-loop binding protein [Source:MGI Symbol;Acc:MGI:108402]	1136	914	1492	1037	1124	1420	1066	1280	1358	ENSG00000054803	140689	CBLN4	cerebellin 4 precursor [Source:HGNC Symbol;Acc:HGNC:16231]	1	2	0	0	1	0	4	0	1	1	0	0	1	0
ENSMUSG00000004651	22173	Tyr	tyrosinase [Source:MGI Symbol;Acc:MGI:98880]	1	0	2	1	0	0	0	1	0	ENSG00000054938	25884	CHRDL2	chordin like 2 [Source:HGNC Symbol;Acc:HGNC:24168]	1	1	1	0	1	2	2	0	1	2	0	0	2	2
ENSMUSG00000004654	14602	Ghrhr	growth hormone releasing hormone receptor [Source:MGI Symbol;Acc:MGI:95710]	0	0	0	0	0	0	0	0	0	ENSG00000054965	23201	FAM168A	family with sequence similarity 168 member A [Source:HGNC Symbol;Acc:HGNC:28999]	987	1211	867	1308	1287	1345	1101	1633	1134	1044	897	1039	734	806
ENSMUSG00000004655	11826	Aqp1	aquaporin 1 [Source:MGI Symbol;Acc:MGI:103201]	7	5	8	6	2	8	2	9	7	ENSG00000054967	84957	RELT	RELT TNF receptor [Source:HGNC Symbol;Acc:HGNC:13764]	63	68	30	68	87	80	61	113	73	70	71	82	54	69
ENSMUSG00000004661	56380	Arid3b	AT rich interactive domain 3B (BRIGHT-like) [Source:MGI Symbol;Acc:MGI:1930768]	915	753	1150	913	1058	1189	1356	1222	1347	ENSG00000054983	2581	GALC	galactosylceramidase [Source:HGNC Symbol;Acc:HGNC:4115]	47	57	195	298	3	4	71	91	100	72	37	32	105	121
ENSMUSG00000004665	12798	Cnn2	calponin 2 [Source:MGI Symbol;Acc:MGI:105093]	1742	1765	2096	1515	1727	2311	2649	2969	2817	ENSG00000055044	51602	NOP58	NOP58 ribonucleoprotein [Source:HGNC Symbol;Acc:HGNC:29926]	215	253	87	195	261	316	270	387	216	197	161	198	184	187
ENSMUSG00000004667	66420	Polr2e	polymerase (RNA) II (DNA directed) polypeptide E [Source:MGI Symbol;Acc:MGI:1913670]	505	491	855	556	571	733	572	699	873	ENSG00000055070	26099	SZRD1	SUZ RNA binding domain containing 1 [Source:HGNC Symbol;Acc:HGNC:30232]	750	869	701	1108	970	1070	826	1145	862	771	710	769	799	929
ENSMUSG00000004668	268379	Abca13	ATP-binding cassette, sub-family A (ABC1), member 13 [Source:MGI Symbol;Acc:MGI:2388707]	19	34	21	33	27	32	93	56	40	ENSG00000055118	3757	KCNH2	potassium voltage-gated channel subfamily H member 2 [Source:HGNC Symbol;Acc:HGNC:6251]	42	54	25	29	129	157	252	374	130	119	130	143	173	192
ENSMUSG00000004677	17925	Myo9b	myosin IXb [Source:MGI Symbol;Acc:MGI:106624]	1200	989	1388	1045	1099	1296	1211	1211	1328	ENSG00000055130	8454	CUL1	cullin 1 [Source:HGNC Symbol;Acc:HGNC:2551]	360	477	216	337	318	354	392	435	363	363	251	320	297	339
ENSMUSG00000004698	79221	Hdac9	histone deacetylase 9 [Source:MGI Symbol;Acc:MGI:1931221]	151	106	142	117	107	140	133	176	133	ENSG00000055147	10827	FAM114A2	family with sequence similarity 114 member A2 [Source:HGNC Symbol;Acc:HGNC:1333]	75	103	80	128	70	84	77	94	75	64	57	49	61	43
ENSMUSG00000004707	17085	Ly9	lymphocyte antigen 9 [Source:MGI Symbol;Acc:MGI:96885]	0	0	0	1	0	0	0	0	0	ENSG00000055163	26999	CYFIP2	cytoplasmic FMR1 interacting protein 2 [Source:HGNC Symbol;Acc:HGNC:13760]	524	536	92	126	1618	1731	1012	1452	1188	1178	1022	1166	555	619
ENSMUSG00000004709	18106	Cd244a	CD244 molecule A [Source:MGI Symbol;Acc:MGI:109294]	0	1	1	3	0	0	0	2	0	ENSG00000055208	23118	TAB2	TGF-beta activated kinase 1 (MAP3K7) binding protein 2 [Source:HGNC Symbol;Acc:HGNC:17075]	791	910	777	1258	889	911	1039	1405	1118	1113	854	913	870	1084
ENSMUSG00000004730	13733	Adgre1	adhesion G protein-coupled receptor E1 [Source:MGI Symbol;Acc:MGI:106912]	0	1	3	0	1	3	2	0	1	ENSG00000055211	116254	GINM1	glycoprotein integral membrane 1 [Source:HGNC Symbol;Acc:HGNC:21074]	140	129	164	226	111	98	132	160	135	120	105	105	74	92
ENSMUSG00000004748	67900	Mtfp1	mitochondrial fission process 1 [Source:MGI Symbol;Acc:MGI:1916686]	59	38	86	49	36	48	43	38	60	ENSG00000055332	5610	EIF2AK2	eukaryotic translation initiation factor 2 alpha kinase 2 [Source:HGNC Symbol;Acc:HGNC:9437]	865	1042	714	1043	1080	1021	887	1226	754	765	699	721	611	708
ENSMUSG00000004768	19335	Rab23	RAB23, member RAS oncogene family [Source:MGI Symbol;Acc:MGI:99833]	556	491	675	527	564	681	447	558	634	ENSG00000055483	57602	USP36	ubiquitin specific peptidase 36 [Source:HGNC Symbol;Acc:HGNC:20062]	236	307	241	393	286	306	265	360	261	242	223	205	273	311
ENSMUSG00000004771	53869	Rab11a	RAB11A, member RAS oncogene family [Source:MGI Symbol;Acc:MGI:1858202]	659	618	884	593	663	849	862	867	968	ENSG00000055609	58508	KMT2C	lysine methyltransferase 2C [Source:HGNC Symbol;Acc:HGNC:13726]	1826	2137	1357	2139	2252	2507	2008	2846	2565	2576	2173	2443	2026	2280
ENSMUSG00000004788	217715	Eif2b2	eukaryotic translation initiation factor 2B, subunit 2 beta [Source:MGI Symbol;Acc:MGI:2145118]	284	253	392	240	278	348	235	300	386	ENSG00000055732	55283	MCOLN3	mucolipin 3 [Source:HGNC Symbol;Acc:HGNC:13358]	0	3	3	5	0	1	13	20	6	0	3	1	1	2
ENSMUSG00000004789	78920	Dlst	dihydrolipoamide S-succinyltransferase (E2 component of 2-oxo-glutarate complex) [Source:MGI Symbol;Acc:MGI:1926170]	1287	1097	1608	1246	1477	1605	1097	1379	1760	ENSG00000055813	114800	CCDC85A	coiled-coil domain containing 85A [Source:HGNC Symbol;Acc:HGNC:29400]	14	6	19	26	0	0	0	0	22	26	4	5	6	10
ENSMUSG00000004791	18654	Pgf	placental growth factor [Source:MGI Symbol;Acc:MGI:105095]	19	3	11	4	10	5	22	11	8	ENSG00000055917	23369	PUM2	pumilio RNA binding family member 2 [Source:HGNC Symbol;Acc:HGNC:14958]	1009	1243	691	1036	1329	1460	1346	1745	1285	1267	1042	1240	1178	1355
ENSMUSG00000004798	29869	Ulk2	unc-51 like kinase 2 [Source:MGI Symbol;Acc:MGI:1352758]	519	466	599	370	489	644	712	608	669	ENSG00000055950	84545	MRPL43	mitochondrial ribosomal protein L43 [Source:HGNC Symbol;Acc:HGNC:14517]	122	126	112	169	128	151	151	180	110	133	104	118	90	124
ENSMUSG00000004814	56221	Ccl24	chemokine (C-C motif) ligand 24 [Source:MGI Symbol;Acc:MGI:1928953]	1	0	4	0	0	1	0	0	0	ENSG00000055955	3700	ITIH4	inter-alpha-trypsin inhibitor heavy chain 4 [Source:HGNC Symbol;Acc:HGNC:6169]	3	4	2	1	0	2	3	7	5	8	2	2	10	12
ENSMUSG00000004815	110524	Dgkq	diacylglycerol kinase, theta [Source:MGI Symbol;Acc:MGI:102918]	201	172	199	188	200	228	173	202	191	ENSG00000055957	3697	ITIH1	inter-alpha-trypsin inhibitor heavy chain 1 [Source:HGNC Symbol;Acc:HGNC:6166]	2	0	0	0	0	0	1	0	2	0	0	1	1	1
ENSMUSG00000004821	67366	Tmed11	transmembrane p24 trafficking protein 11 [Source:MGI Symbol;Acc:MGI:1914616]	0	0	0	0	0	0	0	0	0	ENSG00000056050	54969	HPF1	histone PARylation factor 1 [Source:HGNC Symbol;Acc:HGNC:26051]	51	71	13	39	41	71	73	72	51	49	39	57	57	56
ENSMUSG00000004837	71520	Grap	GRB2-related adaptor protein [Source:MGI Symbol;Acc:MGI:1918770]	18	24	20	19	15	29	13	31	31	ENSG00000056097	51663	ZFR	zinc finger RNA binding protein [Source:HGNC Symbol;Acc:HGNC:17277]	1237	1509	827	1217	1540	1650	1336	1970	1354	1301	1146	1377	1180	1378
ENSMUSG00000004842	18736	Pou1f1	POU domain, class 1, transcription factor 1 [Source:MGI Symbol;Acc:MGI:97588]	3	0	0	1	2	0	2	6	0	ENSG00000056277	55609	ZNF280C	zinc finger protein 280C [Source:HGNC Symbol;Acc:HGNC:25955]	343	435	110	144	266	284	299	397	267	308	259	289	334	404
ENSMUSG00000004843	68942	Chmp2b	charged multivesicular body protein 2B [Source:MGI Symbol;Acc:MGI:1916192]	394	315	445	330	398	477	479	454	480	ENSG00000056291	10886	NPFFR2	neuropeptide FF receptor 2 [Source:HGNC Symbol;Acc:HGNC:4525]	0	2	0	0	0	2	0	1	1	1	0	0	1	0
ENSMUSG00000004846	26433	Plod3	procollagen-lysine, 2-oxoglutarate 5-dioxygenase 3 [Source:MGI Symbol;Acc:MGI:1347008]	513	498	638	525	553	622	753	616	736	ENSG00000056487	112885	PHF21B	PHD finger protein 21B [Source:HGNC Symbol;Acc:HGNC:25161]	112	119	5	3	283	315	220	304	276	281	256	259	255	301
ENSMUSG00000004849	11769	Ap1s1	adaptor protein complex AP-1, sigma 1 [Source:MGI Symbol;Acc:MGI:1098244]	365	362	492	348	384	521	391	451	489	ENSG00000056558	7185	TRAF1	TNF receptor associated factor 1 [Source:HGNC Symbol;Acc:HGNC:12031]	4	9	18	29	3	3	7	15	6	9	6	6	19	15
ENSMUSG00000004864	26415	Mapk13	mitogen-activated protein kinase 13 [Source:MGI Symbol;Acc:MGI:1346864]	97	67	110	88	87	134	148	136	143	ENSG00000056586	54542	RC3H2	ring finger and CCCH-type domains 2 [Source:HGNC Symbol;Acc:HGNC:21461]	915	1105	748	1230	973	1043	1043	1327	1118	1057	849	960	877	948
ENSMUSG00000004865	20815	Srpk1	serine/arginine-rich protein specific kinase 1 [Source:MGI Symbol;Acc:MGI:106908]	2575	2190	3158	2552	2580	3166	2032	2551	2854	ENSG00000056736	55540	IL17RB	interleukin 17 receptor B [Source:HGNC Symbol;Acc:HGNC:18015]	19	14	7	21	44	37	29	32	23	34	24	24	21	23
ENSMUSG00000004872	18505	Pax3	paired box 3 [Source:MGI Symbol;Acc:MGI:97487]	344	419	507	386	426	489	560	592	544	ENSG00000056972	10758	TRAF3IP2	TRAF3 interacting protein 2 [Source:HGNC Symbol;Acc:HGNC:1343]	92	99	70	108	62	61	49	62	67	88	52	48	26	41
ENSMUSG00000004880	98386	Lbr	lamin B receptor [Source:MGI Symbol;Acc:MGI:2138281]	2176	1929	2692	2010	2163	2881	2611	2578	3008	ENSG00000056998	8908	GYG2	glycogenin 2 [Source:HGNC Symbol;Acc:HGNC:4700]	151	171	38	70	383	392	124	135	139	161	154	172	107	124
ENSMUSG00000004885	12904	Crabp2	cellular retinoic acid binding protein II [Source:MGI Symbol;Acc:MGI:88491]	1579	1452	2247	1614	1834	2214	1499	1903	2109	ENSG00000057019	131566	DCBLD2	discoidin, CUB and LCCL domain containing 2 [Source:HGNC Symbol;Acc:HGNC:24627]	1060	1221	988	1629	1554	1682	1077	1321	1328	1301	1149	1283	746	955
ENSMUSG00000004891	18008	Nes	nestin [Source:MGI Symbol;Acc:MGI:101784]	3320	2957	3327	2041	2772	3535	1996	2778	2507	ENSG00000057149	6317	SERPINB3	serpin family B member 3 [Source:HGNC Symbol;Acc:HGNC:10569]	0	0	0	0	0	0	0	0	0	0	1	0	0	0
ENSMUSG00000004892	12032	Bcan	brevican [Source:MGI Symbol;Acc:MGI:1096385]	2	7	2	1	5	3	6	3	4	ENSG00000057252	6646	SOAT1	sterol O-acyltransferase 1 [Source:HGNC Symbol;Acc:HGNC:11177]	282	354	250	341	361	414	319	424	224	193	189	215	258	303
ENSMUSG00000004894	73940	Hapln2	hyaluronan and proteoglycan link protein 2 [Source:MGI Symbol;Acc:MGI:2137300]	0	3	0	0	0	0	0	0	0	ENSG00000057294	5318	PKP2	plakophilin 2 [Source:HGNC Symbol;Acc:HGNC:9024]	2	6	135	236	12	12	58	78	61	57	17	14	55	63
ENSMUSG00000004895	94315	Prcc	papillary renal cell carcinoma (translocation-associated) [Source:MGI Symbol;Acc:MGI:2137738]	809	705	1001	777	902	1012	752	954	1055	ENSG00000057468	4438	MSH4	mutS homolog 4 [Source:HGNC Symbol;Acc:HGNC:7327]	5	3	2	2	0	2	2	0	10	11	2	1	12	15
ENSMUSG00000004896	229503	Rrnad1	ribosomal RNA adenine dimethylase domain containing 1 [Source:MGI Symbol;Acc:MGI:2387197]	222	181	263	199	193	232	258	268	245	ENSG00000057593	2155	F7	coagulation factor VII [Source:HGNC Symbol;Acc:HGNC:3544]	6	1	0	0	0	0	3	3	3	4	2	0	1	4
ENSMUSG00000004897	15191	Hdgf	heparin binding growth factor [Source:MGI Symbol;Acc:MGI:1194494]	3684	3056	4932	3544	4050	5042	4823	5017	5523	ENSG00000057608	2665	GDI2	GDP dissociation inhibitor 2 [Source:HGNC Symbol;Acc:HGNC:4227]	889	1057	734	1127	1154	1228	1234	1445	1156	1109	838	1059	914	1098
ENSMUSG00000004902	71803	Slc25a18	solute carrier family 25 (mitochondrial carrier), member 18 [Source:MGI Symbol;Acc:MGI:1919053]	17	8	26	9	7	14	6	15	12	ENSG00000057657	639	PRDM1	PR/SET domain 1 [Source:HGNC Symbol;Acc:HGNC:9346]	7	6	0	3	26	24	23	26	31	27	18	31	11	7
ENSMUSG00000004929	50492	Thop1	thimet oligopeptidase 1 [Source:MGI Symbol;Acc:MGI:1354165]	1306	1070	1855	1259	1503	1756	1219	1591	1996	ENSG00000057663	9474	ATG5	autophagy related 5 [Source:HGNC Symbol;Acc:HGNC:589]	138	177	133	222	171	190	163	222	166	160	137	126	126	150
ENSMUSG00000004931	57267	Apba3	amyloid beta (A4) precursor protein-binding, family A, member 3 [Source:MGI Symbol;Acc:MGI:1888527]	214	173	311	186	211	258	368	309	323	ENSG00000057704	57458	TMCC3	transmembrane and coiled-coil domain family 3 [Source:HGNC Symbol;Acc:HGNC:29199]	14	20	10	11	16	10	57	72	41	33	21	32	42	49
ENSMUSG00000004933	17179	Matk	megakaryocyte-associated tyrosine kinase [Source:MGI Symbol;Acc:MGI:99259]	65	47	69	53	48	49	70	63	50	ENSG00000057757	57095	PITHD1	PITH domain containing 1 [Source:HGNC Symbol;Acc:HGNC:25022]	89	114	72	121	83	105	118	182	119	140	103	106	179	225
ENSMUSG00000004934	59004	Pias4	protein inhibitor of activated STAT 4 [Source:MGI Symbol;Acc:MGI:2136940]	358	267	397	327	368	479	362	395	467	ENSG00000057935	57504	MTA3	metastasis associated 1 family member 3 [Source:HGNC Symbol;Acc:HGNC:23784]	221	251	183	283	338	323	198	286	352	324	334	310	367	472
ENSMUSG00000004936	26395	Map2k1	mitogen-activated protein kinase kinase 1 [Source:MGI Symbol;Acc:MGI:1346866]	626	547	863	488	650	789	1266	1043	1138	ENSG00000058056	8975	USP13	ubiquitin specific peptidase 13 [Source:HGNC Symbol;Acc:HGNC:12611]	438	434	188	291	393	454	471	627	379	353	264	353	408	424
ENSMUSG00000004937	52551	Sgta	small glutamine-rich tetratricopeptide repeat (TPR)-containing, alpha [Source:MGI Symbol;Acc:MGI:1098703]	905	733	1143	792	998	1213	911	1085	1251	ENSG00000058063	23200	ATP11B	ATPase phospholipid transporting 11B (putative) [Source:HGNC Symbol;Acc:HGNC:13553]	321	354	960	1461	408	464	520	728	443	448	272	310	315	311
ENSMUSG00000004939	69564	Nmrk2	nicotinamide riboside kinase 2 [Source:MGI Symbol;Acc:MGI:1916814]	0	1	0	0	1	1	0	0	0	ENSG00000058085	3918	LAMC2	laminin subunit gamma 2 [Source:HGNC Symbol;Acc:HGNC:6493]	5	5	60	91	1	6	7	13	10	6	5	4	2	2
ENSMUSG00000004945	70544	Tmem242	transmembrane protein 242 [Source:MGI Symbol;Acc:MGI:1917794]	272	231	374	256	265	353	277	276	395	ENSG00000058091	5218	CDK14	cyclin dependent kinase 14 [Source:HGNC Symbol;Acc:HGNC:8883]	721	821	868	1354	457	482	777	997	561	566	447	488	270	334
ENSMUSG00000004947	74198	Dtx2	deltex 2, E3 ubiquitin ligase [Source:MGI Symbol;Acc:MGI:1921448]	315	273	479	268	312	418	305	341	375	ENSG00000058262	29927	SEC61A1	SEC61 translocon alpha 1 subunit [Source:HGNC Symbol;Acc:HGNC:18276]	1762	2081	2915	4829	1590	1710	1560	2491	1606	1573	869	966	730	891
ENSMUSG00000004948	22788	Zp3	zona pellucida glycoprotein 3 [Source:MGI Symbol;Acc:MGI:99215]	0	0	0	0	0	0	0	0	0	ENSG00000058272	4659	PPP1R12A	protein phosphatase 1 regulatory subunit 12A [Source:HGNC Symbol;Acc:HGNC:7618]	996	1110	700	1039	769	827	664	946	892	820	618	684	752	747
ENSMUSG00000004951	15507	Hspb1	heat shock protein 1 [Source:MGI Symbol;Acc:MGI:96240]	18	20	25	12	12	31	30	20	5	ENSG00000058335	5923	RASGRF1	Ras protein specific guanine nucleotide releasing factor 1 [Source:HGNC Symbol;Acc:HGNC:9875]	10	9	1	3	0	0	4	0	24	16	7	0	2	11
ENSMUSG00000004952	54153	Rasa4	RAS p21 protein activator 4 [Source:MGI Symbol;Acc:MGI:1858600]	28	18	36	22	25	15	41	19	16	ENSG00000058404	816	CAMK2B	calcium/calmodulin dependent protein kinase II beta [Source:HGNC Symbol;Acc:HGNC:1461]	24	23	3	0	4	0	7	10	31	21	6	2	7	7
ENSMUSG00000004961	53420	Syt5	synaptotagmin V [Source:MGI Symbol;Acc:MGI:1926368]	13	13	27	16	11	19	24	13	27	ENSG00000058453	9696	CROCC	ciliary rootlet coiled-coil, rootletin [Source:HGNC Symbol;Acc:HGNC:21299]	64	74	47	86	118	119	110	128	100	99	118	139	202	258
ENSMUSG00000004980	53379	Hnrnpa2b1	heterogeneous nuclear ribonucleoprotein A2/B1 [Source:MGI Symbol;Acc:MGI:104819]	15512	13906	19256	14509	16160	19427	16938	18286	19416	ENSG00000058600	55718	POLR3E	RNA polymerase III subunit E [Source:HGNC Symbol;Acc:HGNC:30347]	120	153	110	176	222	236	179	290	189	169	143	185	187	177
ENSMUSG00000004988	108017	Fxyd4	FXYD domain-containing ion transport regulator 4 [Source:MGI Symbol;Acc:MGI:1889005]	9	13	14	4	12	8	5	23	14	ENSG00000058668	493	ATP2B4	ATPase plasma membrane Ca2+ transporting 4 [Source:HGNC Symbol;Acc:HGNC:817]	1603	2001	584	928	993	1099	1400	1928	1033	1031	843	933	1191	1309
ENSMUSG00000004994	67736	Ccdc130	coiled-coil domain containing 130 [Source:MGI Symbol;Acc:MGI:1914986]	73	55	75	44	49	74	96	82	83	ENSG00000058673	9877	ZC3H11A	zinc finger CCCH-type containing 11A [Source:HGNC Symbol;Acc:HGNC:29093]	825	1057	475	884	784	831	716	1166	842	786	760	746	1223	1323
ENSMUSG00000004996	67873	Mri1	methylthioribose-1-phosphate isomerase 1 [Source:MGI Symbol;Acc:MGI:1915123]	186	151	223	200	178	198	223	199	251	ENSG00000058729	55781	RIOK2	RIO kinase 2 [Source:HGNC Symbol;Acc:HGNC:18999]	117	120	101	174	135	152	148	190	130	129	89	102	96	125
ENSMUSG00000005034	18749	Prkacb	protein kinase, cAMP dependent, catalytic, beta [Source:MGI Symbol;Acc:MGI:97594]	1279	1052	1496	1035	1181	1549	1477	1442	1475	ENSG00000058799	54432	YIPF1	Yip1 domain family member 1 [Source:HGNC Symbol;Acc:HGNC:25231]	119	103	95	116	116	132	115	176	106	95	95	101	115	160
ENSMUSG00000005043	27029	Sgsh	N-sulfoglucosamine sulfohydrolase (sulfamidase) [Source:MGI Symbol;Acc:MGI:1350341]	146	126	184	168	151	194	185	162	177	ENSG00000058804	55706	NDC1	NDC1 transmembrane nucleoporin [Source:HGNC Symbol;Acc:HGNC:25525]	409	401	155	245	505	546	502	613	418	399	282	369	374	418
ENSMUSG00000005045	269610	Chd5	chromodomain helicase DNA binding protein 5 [Source:MGI Symbol;Acc:MGI:3036258]	18	18	23	19	15	26	21	5	16	ENSG00000058866	1608	DGKG	diacylglycerol kinase gamma [Source:HGNC Symbol;Acc:HGNC:2853]	5	9	7	10	4	9	5	2	12	12	4	1	1	1
ENSMUSG00000005054	13014	Cstb	cystatin B [Source:MGI Symbol;Acc:MGI:109514]	60	51	123	66	65	99	79	73	122	ENSG00000059122	84256	FLYWCH1	FLYWCH-type zinc finger 1 [Source:HGNC Symbol;Acc:HGNC:25404]	149	173	219	337	196	263	229	313	194	210	183	187	168	191
ENSMUSG00000005057	23921	Sh2b2	SH2B adaptor protein 2 [Source:MGI Symbol;Acc:MGI:1345171]	275	243	342	275	283	363	256	342	356	ENSG00000059145	64718	UNKL	unk like zinc finger [Source:HGNC Symbol;Acc:HGNC:14184]	96	102	62	87	91	91	75	102	94	80	68	77	104	110
ENSMUSG00000005069	19305	Pex5	peroxisomal biogenesis factor 5 [Source:MGI Symbol;Acc:MGI:1098808]	407	284	450	389	351	475	417	360	510	ENSG00000059377	6916	TBXAS1	thromboxane A synthase 1 [Source:HGNC Symbol;Acc:HGNC:11609]	2	8	0	0	4	5	4	7	4	4	5	2	9	5
ENSMUSG00000005078	104771	Jkamp	JNK1/MAPK8-associated membrane protein [Source:MGI Symbol;Acc:MGI:1915057]	206	208	258	177	232	260	279	194	272	ENSG00000059378	64761	PARP12	poly(ADP-ribose) polymerase family member 12 [Source:HGNC Symbol;Acc:HGNC:21919]	45	40	51	81	19	29	20	23	7	9	5	6	8	12
ENSMUSG00000005087	12505	Cd44	CD44 antigen [Source:MGI Symbol;Acc:MGI:88338]	94	84	99	89	116	122	132	119	150	ENSG00000059573	5832	ALDH18A1	aldehyde dehydrogenase 18 family member A1 [Source:HGNC Symbol;Acc:HGNC:9722]	330	415	705	1006	569	641	497	744	491	468	363	382	332	420
ENSMUSG00000005089	20511	Slc1a2	solute carrier family 1 (glial high affinity glutamate transporter), member 2 [Source:MGI Symbol;Acc:MGI:101931]	159	194	203	106	125	175	199	177	122	ENSG00000059588	6894	TARBP1	TAR (HIV-1) RNA binding protein 1 [Source:HGNC Symbol;Acc:HGNC:11568]	278	278	105	156	245	269	215	292	212	229	155	214	485	557
ENSMUSG00000005102	27103	Eif2ak4	eukaryotic translation initiation factor 2 alpha kinase 4 [Source:MGI Symbol;Acc:MGI:1353427]	783	630	907	723	770	888	1083	930	1005	ENSG00000059691	5188	GATB	glutamyl-tRNA amidotransferase subunit B [Source:HGNC Symbol;Acc:HGNC:8849]	89	95	82	95	111	125	115	147	83	105	92	93	57	82
ENSMUSG00000005103	22388	Wdr1	WD repeat domain 1 [Source:MGI Symbol;Acc:MGI:1337100]	2042	1809	2466	1915	2116	2530	1981	2458	2679	ENSG00000059728	4084	MXD1	MAX dimerization protein 1 [Source:HGNC Symbol;Acc:HGNC:6761]	58	62	101	183	135	108	84	95	143	134	117	128	136	129
ENSMUSG00000005107	117591	Slc2a9	solute carrier family 2 (facilitated glucose transporter), member 9 [Source:MGI Symbol;Acc:MGI:2152844]	0	1	1	2	5	2	6	5	2	ENSG00000059758	5128	CDK17	cyclin dependent kinase 17 [Source:HGNC Symbol;Acc:HGNC:8750]	216	250	153	256	326	374	235	355	244	267	237	276	185	230
ENSMUSG00000005124	22402	Ccn4	cellular communication network factor 4 [Source:MGI Symbol;Acc:MGI:1197008]	87	79	91	61	121	85	98	103	73	ENSG00000059769	548645	DNAJC25	DnaJ heat shock protein family (Hsp40) member C25 [Source:HGNC Symbol;Acc:HGNC:34187]	24	38	34	55	26	38	30	24	36	42	24	29	22	30
ENSMUSG00000005125	17988	Ndrg1	N-myc downstream regulated gene 1 [Source:MGI Symbol;Acc:MGI:1341799]	19	24	30	22	23	34	721	190	142	ENSG00000059804	6515	SLC2A3	solute carrier family 2 member 3 [Source:HGNC Symbol;Acc:HGNC:11007]	856	962	373	661	2108	2335	1398	1949	817	837	1167	1419	809	942
ENSMUSG00000005131	75311	4930550C14Rik	RIKEN cDNA 4930550C14 gene [Source:MGI Symbol;Acc:MGI:1922561]	11	7	9	0	2	4	10	11	10	ENSG00000059915	5662	PSD	pleckstrin and Sec7 domain containing [Source:HGNC Symbol;Acc:HGNC:9507]	16	21	12	14	167	190	55	72	85	90	65	100	128	133
ENSMUSG00000005142	17159	Man2b1	mannosidase 2, alpha B1 [Source:MGI Symbol;Acc:MGI:107286]	303	337	480	396	381	497	473	516	538	ENSG00000060069	9150	CTDP1	CTD phosphatase subunit 1 [Source:HGNC Symbol;Acc:HGNC:2498]	57	95	69	112	103	98	90	141	75	83	63	73	65	80
ENSMUSG00000005148	12224	Klf5	Kruppel-like factor 5 [Source:MGI Symbol;Acc:MGI:1338056]	49	37	80	54	63	94	92	91	122	ENSG00000060138	8531	YBX3	Y-box binding protein 3 [Source:HGNC Symbol;Acc:HGNC:2428]	356	432	361	560	459	484	681	901	393	348	265	279	315	397
ENSMUSG00000005150	67836	Wdr83	WD repeat domain containing 83 [Source:MGI Symbol;Acc:MGI:1915086]	199	166	230	198	218	231	130	213	237	ENSG00000060140	55359	STYK1	serine/threonine/tyrosine kinase 1 [Source:HGNC Symbol;Acc:HGNC:18889]	1	2	1	0	1	2	0	0	0	1	0	0	0	0
ENSMUSG00000005161	21672	Prdx2	peroxiredoxin 2 [Source:MGI Symbol;Acc:MGI:109486]	2857	2688	4046	2546	2801	3988	2829	3088	3572	ENSG00000060237	65125	WNK1	WNK lysine deficient protein kinase 1 [Source:HGNC Symbol;Acc:HGNC:14540]	3224	3844	3925	6478	3451	3448	2995	4387	3251	3118	2596	2780	2535	2918
ENSMUSG00000005198	20020	Polr2a	polymerase (RNA) II (DNA directed) polypeptide A [Source:MGI Symbol;Acc:MGI:98086]	9127	7326	10692	7682	8820	11022	8196	9898	10720	ENSG00000060303	.	RPS17P5	ribosomal protein S17 pseudogene 5 [Source:HGNC Symbol;Acc:HGNC:21352]	0	1	1	1	0	0	0	0	0	1	0	0	1	0
ENSMUSG00000005202	20415	Shbg	sex hormone binding globulin [Source:MGI Symbol;Acc:MGI:98295]	0	0	0	0	0	0	0	0	0	ENSG00000060339	55749	CCAR1	cell division cycle and apoptosis regulator 1 [Source:HGNC Symbol;Acc:HGNC:24236]	508	518	305	494	692	758	556	822	667	639	564	571	600	603
ENSMUSG00000005204	80886	Senp3	SUMO/sentrin specific peptidase 3 [Source:MGI Symbol;Acc:MGI:2158736]	1301	1099	1775	1401	1546	1668	1089	1525	1770	ENSG00000060491	11054	OGFR	opioid growth factor receptor [Source:HGNC Symbol;Acc:HGNC:15768]	47	81	71	128	74	85	72	74	95	90	66	80	60	77
ENSMUSG00000005220	53419	Corin	corin, serine peptidase [Source:MGI Symbol;Acc:MGI:1349451]	16	17	11	6	18	10	22	17	19	ENSG00000060558	2769	GNA15	G protein subunit alpha 15 [Source:HGNC Symbol;Acc:HGNC:4383]	0	0	1	0	0	2	0	0	0	0	0	0	0	1
ENSMUSG00000005225	231999	Plekha8	pleckstrin homology domain containing, family A (phosphoinositide binding specific) member 8 [Source:MGI Symbol;Acc:MGI:2681164]	1480	1169	1593	1155	1504	1700	1257	1370	1503	ENSG00000060566	84699	CREB3L3	cAMP responsive element binding protein 3 like 3 [Source:HGNC Symbol;Acc:HGNC:18855]	0	0	0	0	0	0	1	0	0	1	0	0	0	2
ENSMUSG00000005232	14378	G6pc2	glucose-6-phosphatase, catalytic, 2 [Source:MGI Symbol;Acc:MGI:1277193]	0	0	0	0	0	0	1	1	0	ENSG00000060642	55650	PIGV	phosphatidylinositol glycan anchor biosynthesis class V [Source:HGNC Symbol;Acc:HGNC:26031]	23	29	23	54	45	43	36	57	40	45	39	41	65	67
ENSMUSG00000005233	66442	Spc25	SPC25, NDC80 kinetochore complex component, homolog (S. cerevisiae) [Source:MGI Symbol;Acc:MGI:1913692]	495	450	613	429	591	687	550	590	677	ENSG00000060656	10076	PTPRU	protein tyrosine phosphatase receptor type U [Source:HGNC Symbol;Acc:HGNC:9683]	60	65	34	68	77	82	173	243	188	184	80	100	200	206
ENSMUSG00000005237	327954	Dnah2	dynein, axonemal, heavy chain 2 [Source:MGI Symbol;Acc:MGI:107731]	34	35	18	25	20	37	73	33	52	ENSG00000060688	9410	SNRNP40	small nuclear ribonucleoprotein U5 subunit 40 [Source:HGNC Symbol;Acc:HGNC:30857]	222	280	130	191	358	370	292	440	275	245	203	250	341	357
ENSMUSG00000005251	72388	Ripk4	receptor-interacting serine-threonine kinase 4 [Source:MGI Symbol;Acc:MGI:1919638]	68	64	100	68	72	95	103	116	133	ENSG00000060709	23504	RIMBP2	RIMS binding protein 2 [Source:HGNC Symbol;Acc:HGNC:30339]	13	15	4	9	7	12	45	44	62	50	28	32	42	52
ENSMUSG00000005262	22230	Ufd1	ubiquitin recognition factor in ER-associated degradation 1 [Source:MGI Symbol;Acc:MGI:109353]	333	336	465	342	340	476	369	408	486	ENSG00000060718	1301	COL11A1	collagen type XI alpha 1 chain [Source:HGNC Symbol;Acc:HGNC:2186]	1904	2291	2369	3477	431	413	454	591	1951	2018	380	497	521	541
ENSMUSG00000005267	170740	Zfp287	zinc finger protein 287 [Source:MGI Symbol;Acc:MGI:2176561]	165	157	221	162	148	180	242	266	236	ENSG00000060749	79832	QSER1	glutamine and serine rich 1 [Source:HGNC Symbol;Acc:HGNC:26154]	2094	2397	936	1553	2331	2525	2454	3592	2423	2340	1937	2053	2705	2959
ENSMUSG00000005268	19116	Prlr	prolactin receptor [Source:MGI Symbol;Acc:MGI:97763]	6	18	11	8	17	6	1	16	4	ENSG00000060762	51660	MPC1	mitochondrial pyruvate carrier 1 [Source:HGNC Symbol;Acc:HGNC:21606]	80	76	69	82	80	95	71	127	59	50	35	32	10	27
ENSMUSG00000005299	56384	Letm1	leucine zipper-EF-hand containing transmembrane protein 1 [Source:MGI Symbol;Acc:MGI:1932557]	613	517	777	639	679	746	436	626	697	ENSG00000060971	30	ACAA1	acetyl-CoA acyltransferase 1 [Source:HGNC Symbol;Acc:HGNC:82]	68	68	70	105	69	79	57	65	53	62	38	53	69	69
ENSMUSG00000005312	56085	Ubqln1	ubiquilin 1 [Source:MGI Symbol;Acc:MGI:1860276]	2882	2455	3878	2890	3371	3911	3359	3772	4185	ENSG00000060982	586	BCAT1	branched chain amino acid transaminase 1 [Source:HGNC Symbol;Acc:HGNC:976]	2272	2657	2124	3052	5055	5561	3329	4495	2935	2941	1939	2181	2150	2416
ENSMUSG00000005320	14186	Fgfr4	fibroblast growth factor receptor 4 [Source:MGI Symbol;Acc:MGI:95525]	11	10	5	3	4	5	8	6	7	ENSG00000061273	51564	HDAC7	histone deacetylase 7 [Source:HGNC Symbol;Acc:HGNC:14067]	699	895	1256	1892	849	895	728	1041	736	756	612	728	553	685
ENSMUSG00000005338	94332	Cadm3	cell adhesion molecule 3 [Source:MGI Symbol;Acc:MGI:2137858]	114	102	134	94	105	95	79	115	119	ENSG00000061337	11178	LZTS1	leucine zipper tumor suppressor 1 [Source:HGNC Symbol;Acc:HGNC:13861]	934	1052	81	106	438	500	555	843	454	469	243	279	125	148
ENSMUSG00000005339	14125	Fcer1a	Fc receptor, IgE, high affinity I, alpha polypeptide [Source:MGI Symbol;Acc:MGI:95494]	0	0	0	1	0	0	0	0	0	ENSG00000061455	93166	PRDM6	PR/SET domain 6 [Source:HGNC Symbol;Acc:HGNC:9350]	4	6	43	78	1	6	13	7	8	14	5	2	1	12
ENSMUSG00000005354	56551	Txn2	thioredoxin 2 [Source:MGI Symbol;Acc:MGI:1929468]	448	366	616	490	490	691	473	570	611	ENSG00000061492	7478	WNT8A	Wnt family member 8A [Source:HGNC Symbol;Acc:HGNC:12788]	0	0	0	0	1	0	0	0	0	2	0	0	16	25
ENSMUSG00000005355	12365	Casp14	caspase 14 [Source:MGI Symbol;Acc:MGI:1335092]	0	0	0	0	1	0	0	0	0	ENSG00000061656	6676	SPAG4	sperm associated antigen 4 [Source:HGNC Symbol;Acc:HGNC:11214]	3	1	11	17	1	2	4	4	2	7	4	7	13	13
ENSMUSG00000005357	20513	Slc1a6	solute carrier family 1 (high affinity aspartate/glutamate transporter), member 6 [Source:MGI Symbol;Acc:MGI:1096331]	10	11	15	7	12	15	21	13	13	ENSG00000061676	10787	NCKAP1	NCK associated protein 1 [Source:HGNC Symbol;Acc:HGNC:7666]	1698	1972	1408	2162	1702	1970	1977	2389	1727	1720	1263	1451	1378	1487
ENSMUSG00000005360	20512	Slc1a3	solute carrier family 1 (glial high affinity glutamate transporter), member 3 [Source:MGI Symbol;Acc:MGI:99917]	228	214	225	168	171	232	263	278	231	ENSG00000061794	60488	MRPS35	mitochondrial ribosomal protein S35 [Source:HGNC Symbol;Acc:HGNC:16635]	114	131	112	178	132	162	148	149	107	104	104	111	95	99
ENSMUSG00000005362	58799	Crbn	cereblon [Source:MGI Symbol;Acc:MGI:1913277]	272	233	275	266	246	320	313	316	381	ENSG00000061918	2983	GUCY1B1	guanylate cyclase 1 soluble subunit beta 1 [Source:HGNC Symbol;Acc:HGNC:4687]	36	31	5	20	104	131	133	169	77	59	54	59	50	83
ENSMUSG00000005364	16192	Il5ra	interleukin 5 receptor, alpha [Source:MGI Symbol;Acc:MGI:96558]	0	0	4	0	3	0	3	1	0	ENSG00000061936	6433	SFSWAP	splicing factor SWAP [Source:HGNC Symbol;Acc:HGNC:10790]	260	351	208	307	370	424	318	485	297	295	320	293	263	297
ENSMUSG00000005370	17688	Msh6	mutS homolog 6 [Source:MGI Symbol;Acc:MGI:1343961]	2335	2108	2846	2334	2554	3045	2101	2622	3009	ENSG00000061938	10188	TNK2	tyrosine kinase non receptor 2 [Source:HGNC Symbol;Acc:HGNC:19297]	220	244	318	449	301	318	271	347	258	257	233	267	206	260
ENSMUSG00000005371	225055	Fbxo11	F-box protein 11 [Source:MGI Symbol;Acc:MGI:2147134]	1375	1232	1776	1202	1360	1746	1758	1564	1810	ENSG00000061987	23041	MON2	MON2 homolog, regulator of endosome-to-Golgi trafficking [Source:HGNC Symbol;Acc:HGNC:29177]	564	704	673	1064	770	772	709	878	794	809	646	766	653	796
ENSMUSG00000005373	58805	Mlxipl	MLX interacting protein-like [Source:MGI Symbol;Acc:MGI:1927999]	31	31	32	9	41	35	35	22	24	ENSG00000062038	1001	CDH3	cadherin 3 [Source:HGNC Symbol;Acc:HGNC:1762]	20	39	3	4	18	32	37	42	36	28	12	17	43	37
ENSMUSG00000005374	27368	Tbl2	transducin (beta)-like 2 [Source:MGI Symbol;Acc:MGI:1351652]	376	327	521	329	409	440	1329	876	744	ENSG00000062096	416	ARSF	arylsulfatase F [Source:HGNC Symbol;Acc:HGNC:721]	0	0	0	0	0	1	1	1	0	0	0	0	0	0
ENSMUSG00000005378	66138	Bud23	BUD23, rRNA methyltransferase and ribosome maturation factor [Source:MGI Symbol;Acc:MGI:1913388]	609	476	733	548	641	774	523	688	710	ENSG00000062194	65056	GPBP1	GC-rich promoter binding protein 1 [Source:HGNC Symbol;Acc:HGNC:29520]	524	650	312	594	690	737	698	985	683	670	546	633	671	702
ENSMUSG00000005397	18073	Nid1	nidogen 1 [Source:MGI Symbol;Acc:MGI:97342]	2120	1948	2239	1574	1839	2598	3028	2830	3044	ENSG00000062282	84649	DGAT2	diacylglycerol O-acyltransferase 2 [Source:HGNC Symbol;Acc:HGNC:16940]	3	2	2	7	1	2	10	6	16	4	6	2	4	6
ENSMUSG00000005410	17218	Mcm5	minichromosome maintenance complex component 5 [Source:MGI Symbol;Acc:MGI:103197]	3448	2944	4632	3322	3733	4791	3334	3938	4811	ENSG00000062370	7771	ZNF112	zinc finger protein 112 [Source:HGNC Symbol;Acc:HGNC:12892]	81	77	43	73	85	94	96	121	111	97	90	114	67	75
ENSMUSG00000005413	15368	Hmox1	heme oxygenase 1 [Source:MGI Symbol;Acc:MGI:96163]	97	101	135	90	108	116	447	222	262	ENSG00000062485	1431	CS	citrate synthase [Source:HGNC Symbol;Acc:HGNC:2422]	1456	1673	986	1509	1521	1749	1630	2106	1501	1478	1281	1522	1306	1495
ENSMUSG00000005417	26936	Mprip	myosin phosphatase Rho interacting protein [Source:MGI Symbol;Acc:MGI:1349438]	3795	3124	4521	3290	3597	4457	3650	3951	4529	ENSG00000062524	4058	LTK	leukocyte receptor tyrosine kinase [Source:HGNC Symbol;Acc:HGNC:6721]	1	3	4	5	0	2	11	17	2	0	4	0	1	0
ENSMUSG00000005442	71722	Cic	capicua transcriptional repressor [Source:MGI Symbol;Acc:MGI:1918972]	1872	1684	2148	1560	1757	2115	1802	2016	2069	ENSG00000062582	64951	MRPS24	mitochondrial ribosomal protein S24 [Source:HGNC Symbol;Acc:HGNC:14510]	125	148	113	151	117	145	148	187	101	107	87	91	74	92
ENSMUSG00000005447	18476	Pafah1b3	platelet-activating factor acetylhydrolase, isoform 1b, subunit 3 [Source:MGI Symbol;Acc:MGI:108414]	474	432	612	463	483	582	766	634	774	ENSG00000062598	63916	ELMO2	engulfment and cell motility 2 [Source:HGNC Symbol;Acc:HGNC:17233]	482	584	414	680	471	602	491	664	497	472	344	422	414	457
ENSMUSG00000005465	50931	Il27ra	interleukin 27 receptor, alpha [Source:MGI Symbol;Acc:MGI:1355318]	2	2	3	0	3	5	2	1	4	ENSG00000062650	23063	WAPL	WAPL cohesin release factor [Source:HGNC Symbol;Acc:HGNC:23293]	462	589	313	475	579	632	519	653	561	547	451	567	489	497
ENSMUSG00000005469	18747	Prkaca	protein kinase, cAMP dependent, catalytic, alpha [Source:MGI Symbol;Acc:MGI:97592]	1250	1029	1558	1108	1202	1686	1341	1365	1529	ENSG00000062716	81671	VMP1	vacuole membrane protein 1 [Source:HGNC Symbol;Acc:HGNC:29559]	708	751	3119	4832	1333	1486	934	1233	1441	1396	1195	1278	575	622
ENSMUSG00000005470	66929	Asf1b	anti-silencing function 1B histone chaperone [Source:MGI Symbol;Acc:MGI:1914179]	358	304	445	325	393	447	206	309	374	ENSG00000062725	10513	APPBP2	amyloid beta precursor protein binding protein 2 [Source:HGNC Symbol;Acc:HGNC:622]	418	558	392	542	594	614	582	648	559	517	416	460	326	361
ENSMUSG00000005474	59310	Myl10	myosin, light chain 10, regulatory [Source:MGI Symbol;Acc:MGI:1891705]	0	0	0	0	0	0	0	1	0	ENSG00000062822	5424	POLD1	DNA polymerase delta 1, catalytic subunit [Source:HGNC Symbol;Acc:HGNC:9175]	170	263	70	121	324	330	263	355	188	168	183	194	134	184
ENSMUSG00000005481	68278	Ddx39	DEAD (Asp-Glu-Ala-Asp) box polypeptide 39 [Source:MGI Symbol;Acc:MGI:1915528]	1203	1113	1723	1386	1551	1775	1305	1880	2162	ENSG00000063015	124925	SEZ6	seizure related 6 homolog [Source:HGNC Symbol;Acc:HGNC:15955]	234	275	6	5	51	51	268	368	86	68	25	32	39	49
ENSMUSG00000005483	81489	Dnajb1	DnaJ heat shock protein family (Hsp40) member B1 [Source:MGI Symbol;Acc:MGI:1931874]	456	455	863	520	538	842	487	568	915	ENSG00000063046	1975	EIF4B	eukaryotic translation initiation factor 4B [Source:HGNC Symbol;Acc:HGNC:3285]	1360	1702	2145	3379	1600	1837	1839	2367	2206	2093	2047	2249	2424	2795
ENSMUSG00000005493	55993	Msh4	mutS homolog 4 [Source:MGI Symbol;Acc:MGI:1860077]	10	9	8	4	22	6	7	14	5	ENSG00000063127	28968	SLC6A16	solute carrier family 6 member 16 [Source:HGNC Symbol;Acc:HGNC:13622]	16	26	16	22	55	57	35	65	99	106	85	97	136	142
ENSMUSG00000005501	227334	Usp40	ubiquitin specific peptidase 40 [Source:MGI Symbol;Acc:MGI:2443184]	794	623	761	622	720	777	856	812	888	ENSG00000063169	29998	BICRA	BRD4 interacting chromatin remodeling complex associated protein [Source:HGNC Symbol;Acc:HGNC:4332]	252	333	190	332	368	419	364	491	360	361	339	337	352	432
ENSMUSG00000005503	14028	Evx1	even-skipped homeobox 1 [Source:MGI Symbol;Acc:MGI:95461]	8	6	2	6	4	0	8	13	1	ENSG00000063176	56848	SPHK2	sphingosine kinase 2 [Source:HGNC Symbol;Acc:HGNC:18859]	113	101	53	99	118	128	112	204	105	93	98	108	96	162
ENSMUSG00000005505	67136	Kbtbd4	kelch repeat and BTB (POZ) domain containing 4 [Source:MGI Symbol;Acc:MGI:1914386]	298	272	403	238	311	396	221	253	357	ENSG00000063177	6141	RPL18	ribosomal protein L18 [Source:HGNC Symbol;Acc:HGNC:10310]	230	304	283	351	264	406	387	402	264	276	263	326	263	308
ENSMUSG00000005506	13046	Celf1	CUGBP, Elav-like family member 1 [Source:MGI Symbol;Acc:MGI:1342295]	4631	4057	5829	4299	4984	5863	4372	5222	6104	ENSG00000063180	770	CA11	carbonic anhydrase 11 [Source:HGNC Symbol;Acc:HGNC:1370]	42	64	33	29	24	29	73	105	60	51	24	50	137	138
ENSMUSG00000005510	68349	Ndufs3	NADH:ubiquinone oxidoreductase core subunit S3 [Source:MGI Symbol;Acc:MGI:1915599]	350	307	470	353	372	522	381	429	515	ENSG00000063241	79763	ISOC2	isochorismatase domain containing 2 [Source:HGNC Symbol;Acc:HGNC:26278]	126	136	207	324	144	145	176	277	125	127	81	88	142	132
ENSMUSG00000005514	18984	Por	P450 (cytochrome) oxidoreductase [Source:MGI Symbol;Acc:MGI:97744]	624	506	784	486	607	738	615	588	670	ENSG00000063244	11338	U2AF2	U2 small nuclear RNA auxiliary factor 2 [Source:HGNC Symbol;Acc:HGNC:23156]	658	822	389	697	866	926	810	1175	697	595	507	559	525	567
ENSMUSG00000005533	16001	Igf1r	insulin-like growth factor I receptor [Source:MGI Symbol;Acc:MGI:96433]	3565	2945	3654	2743	2987	3622	5346	4470	4666	ENSG00000063245	29924	EPN1	epsin 1 [Source:HGNC Symbol;Acc:HGNC:21604]	356	457	330	578	463	457	456	574	500	446	315	368	348	400
ENSMUSG00000005534	16337	Insr	insulin receptor [Source:MGI Symbol;Acc:MGI:96575]	1062	888	1117	855	1027	1144	1650	1246	1240	ENSG00000063322	55588	MED29	mediator complex subunit 29 [Source:HGNC Symbol;Acc:HGNC:23074]	221	244	165	265	224	265	208	275	201	195	155	191	186	217
ENSMUSG00000005540	14128	Fcer2a	Fc receptor, IgE, low affinity II, alpha polypeptide [Source:MGI Symbol;Acc:MGI:95497]	13	10	15	14	23	15	8	12	6	ENSG00000063438	.	AHRR	aryl-hydrocarbon receptor repressor [Source:HGNC Symbol;Acc:HGNC:346]	19	42	5	10	7	9	3	12	9	12	10	11	9	4
ENSMUSG00000005547	13087	Cyp2a5	cytochrome P450, family 2, subfamily a, polypeptide 5 [Source:MGI Symbol;Acc:MGI:88597]	0	0	0	0	0	0	0	0	0	ENSG00000063515	2928	GSC2	goosecoid homeobox 2 [Source:HGNC Symbol;Acc:HGNC:4613]	0	0	0	0	0	0	0	0	0	1	0	0	0	0
ENSMUSG00000005553	11944	Atp4a	ATPase, H+/K+ exchanging, gastric, alpha polypeptide [Source:MGI Symbol;Acc:MGI:88113]	10	5	10	8	10	4	22	9	15	ENSG00000063587	10838	ZNF275	zinc finger protein 275 [Source:HGNC Symbol;Acc:HGNC:13069]	301	368	327	581	389	414	385	506	404	369	215	237	256	292
ENSMUSG00000005566	21849	Trim28	tripartite motif-containing 28 [Source:MGI Symbol;Acc:MGI:109274]	8565	7634	11586	8272	9355	11022	7430	9535	11753	ENSG00000063601	8776	MTMR1	myotubularin related protein 1 [Source:HGNC Symbol;Acc:HGNC:7449]	114	181	133	225	189	205	202	241	190	191	146	156	149	166
ENSMUSG00000005575	22192	Ube2m	ubiquitin-conjugating enzyme E2M [Source:MGI Symbol;Acc:MGI:108278]	1519	1328	1988	1437	1721	2121	1620	1967	2015	ENSG00000063660	2817	GPC1	glypican 1 [Source:HGNC Symbol;Acc:HGNC:4449]	355	432	198	328	1087	1002	697	931	373	425	325	356	314	363
ENSMUSG00000005580	11515	Adcy9	adenylate cyclase 9 [Source:MGI Symbol;Acc:MGI:108450]	26	27	37	11	32	39	42	35	32	ENSG00000063761	57143	ADCK1	aarF domain containing kinase 1 [Source:HGNC Symbol;Acc:HGNC:19038]	58	55	27	49	52	57	41	73	47	52	25	33	48	47
ENSMUSG00000005583	17260	Mef2c	myocyte enhancer factor 2C [Source:MGI Symbol;Acc:MGI:99458]	215	219	303	231	232	316	477	344	391	ENSG00000063854	3029	HAGH	hydroxyacylglutathione hydrolase [Source:HGNC Symbol;Acc:HGNC:4805]	36	43	28	59	52	60	60	51	50	65	43	42	23	48
ENSMUSG00000005609	22083	Ctr9	CTR9 homolog, Paf1/RNA polymerase II complex component [Source:MGI Symbol;Acc:MGI:109345]	1212	1008	1606	1090	1183	1485	904	1263	1612	ENSG00000063978	6047	RNF4	ring finger protein 4 [Source:HGNC Symbol;Acc:HGNC:10067]	435	520	359	579	552	584	516	744	500	478	402	415	458	518
ENSMUSG00000005610	13690	Eif4g2	eukaryotic translation initiation factor 4, gamma 2 [Source:MGI Symbol;Acc:MGI:109207]	20651	17565	26471	19317	22773	27054	16992	21837	26165	ENSG00000064012	841	CASP8	caspase 8 [Source:HGNC Symbol;Acc:HGNC:1509]	15	17	38	85	16	13	7	18	28	21	15	12	6	3
ENSMUSG00000005611	17540	Mrvi1	MRV integration site 1 [Source:MGI Symbol;Acc:MGI:1338023]	16	16	28	9	18	17	37	19	42	ENSG00000064042	22998	LIMCH1	LIM and calponin homology domains 1 [Source:HGNC Symbol;Acc:HGNC:29191]	1760	2005	914	1544	653	728	468	608	1041	939	796	924	633	677
ENSMUSG00000005615	13026	Pcyt1a	phosphate cytidylyltransferase 1, choline, alpha isoform [Source:MGI Symbol;Acc:MGI:88557]	685	641	927	599	843	936	664	774	940	ENSG00000064102	55726	INTS13	integrator complex subunit 13 [Source:HGNC Symbol;Acc:HGNC:20174]	123	151	131	198	117	124	150	205	151	161	111	116	135	172
ENSMUSG00000005621	233410	Zfp592	zinc finger protein 592 [Source:MGI Symbol;Acc:MGI:2443541]	867	698	1000	698	849	920	748	903	928	ENSG00000064115	51768	TM7SF3	transmembrane 7 superfamily member 3 [Source:HGNC Symbol;Acc:HGNC:23049]	273	360	176	295	400	451	222	311	317	327	259	357	200	248
ENSMUSG00000005625	19185	Psmd4	proteasome (prosome, macropain) 26S subunit, non-ATPase, 4 [Source:MGI Symbol;Acc:MGI:1201670]	799	755	1112	853	960	1114	816	1079	1300	ENSG00000064195	1747	DLX3	distal-less homeobox 3 [Source:HGNC Symbol;Acc:HGNC:2916]	1	1	1	2	2	6	2	0	4	1	0	2	1	2
ENSMUSG00000005628	50874	Tmod4	tropomodulin 4 [Source:MGI Symbol;Acc:MGI:1355285]	4	5	2	1	0	0	5	0	3	ENSG00000064199	53340	SPA17	sperm autoantigenic protein 17 [Source:HGNC Symbol;Acc:HGNC:11210]	88	89	25	33	174	193	139	204	160	149	124	155	130	148
ENSMUSG00000005640	23920	Insrr	insulin receptor-related receptor [Source:MGI Symbol;Acc:MGI:1346037]	0	2	0	0	1	0	2	1	0	ENSG00000064201	10077	TSPAN32	tetraspanin 32 [Source:HGNC Symbol;Acc:HGNC:13410]	1	7	2	8	1	1	0	3	7	7	3	2	5	4
ENSMUSG00000005649	29865	Cabp5	calcium binding protein 5 [Source:MGI Symbol;Acc:MGI:1352746]	4	4	4	1	7	3	1	1	3	ENSG00000064205	8839	CCN5	cellular communication network factor 5 [Source:HGNC Symbol;Acc:HGNC:12770]	4	3	3	0	3	1	4	8	12	5	2	2	12	6
ENSMUSG00000005656	72183	Snx6	sorting nexin 6 [Source:MGI Symbol;Acc:MGI:1919433]	1060	974	1410	1046	1190	1459	1338	1419	1617	ENSG00000064218	58524	DMRT3	doublesex and mab-3 related transcription factor 3 [Source:HGNC Symbol;Acc:HGNC:13909]	0	0	0	0	0	0	2	0	3	1	2	1	0	0
ENSMUSG00000005667	17768	Mthfd2	methylenetetrahydrofolate dehydrogenase (NAD+ dependent), methenyltetrahydrofolate cyclohydrolase [Source:MGI Symbol;Acc:MGI:1338850]	581	541	859	673	773	909	1904	1091	1151	ENSG00000064225	10402	ST3GAL6	ST3 beta-galactoside alpha-2,3-sialyltransferase 6 [Source:HGNC Symbol;Acc:HGNC:18080]	29	19	74	114	36	49	51	54	46	43	35	36	37	49
ENSMUSG00000005672	16590	Kit	KIT proto-oncogene receptor tyrosine kinase [Source:MGI Symbol;Acc:MGI:96677]	588	516	743	539	661	698	836	761	781	ENSG00000064270	9914	ATP2C2	ATPase secretory pathway Ca2+ transporting 2 [Source:HGNC Symbol;Acc:HGNC:29103]	20	24	9	14	11	9	21	42	26	26	13	34	27	28
ENSMUSG00000005674	641376	Tomm40l	translocase of outer mitochondrial membrane 40-like [Source:MGI Symbol;Acc:MGI:3589112]	178	172	207	192	201	234	163	208	221	ENSG00000064300	4804	NGFR	nerve growth factor receptor [Source:HGNC Symbol;Acc:HGNC:7809]	42	52	34	46	3	5	191	274	17	19	23	29	93	101
ENSMUSG00000005677	12355	Nr1i3	nuclear receptor subfamily 1, group I, member 3 [Source:MGI Symbol;Acc:MGI:1346307]	2	1	7	1	1	9	8	1	3	ENSG00000064309	50937	CDON	cell adhesion associated, oncogene regulated [Source:HGNC Symbol;Acc:HGNC:17104]	736	876	489	734	20	24	1480	2006	827	842	544	644	562	643
ENSMUSG00000005681	11807	Apoa2	apolipoprotein A-II [Source:MGI Symbol;Acc:MGI:88050]	3	1	3	3	1	3	5	1	0	ENSG00000064313	6873	TAF2	TATA-box binding protein associated factor 2 [Source:HGNC Symbol;Acc:HGNC:11536]	317	413	253	378	379	417	378	511	318	347	265	302	264	324
ENSMUSG00000005682	103135	Pan2	PAN2 poly(A) specific ribonuclease subunit [Source:MGI Symbol;Acc:MGI:1918984]	1010	842	1091	862	869	998	1204	1033	1080	ENSG00000064393	28996	HIPK2	homeodomain interacting protein kinase 2 [Source:HGNC Symbol;Acc:HGNC:14402]	4035	4781	872	1289	3947	4096	3285	4537	3189	3244	2775	3031	1915	2144
ENSMUSG00000005683	12974	Cs	citrate synthase [Source:MGI Symbol;Acc:MGI:88529]	3651	3269	4708	3434	3916	5027	3439	3934	4601	ENSG00000064419	23534	TNPO3	transportin 3 [Source:HGNC Symbol;Acc:HGNC:17103]	649	691	349	556	759	773	723	984	762	768	552	644	803	966
ENSMUSG00000005686	11717	Ampd3	adenosine monophosphate deaminase 3 [Source:MGI Symbol;Acc:MGI:1096344]	23	36	28	21	25	34	42	24	23	ENSG00000064489	.	BORCS8-MEF2B	BORCS8-MEF2B readthrough [Source:HGNC Symbol;Acc:HGNC:39979]	13	8	1	27	21	7	11	39	24	0	15	23	9	20
ENSMUSG00000005687	68183	Bcas2	breast carcinoma amplified sequence 2 [Source:MGI Symbol;Acc:MGI:1915433]	799	796	1104	871	857	1098	892	1016	1197	ENSG00000064490	8625	RFXANK	regulatory factor X associated ankyrin containing protein [Source:HGNC Symbol;Acc:HGNC:9987]	72	101	66	124	81	105	91	163	101	102	92	116	91	109
ENSMUSG00000005696	20400	Sh2d1a	SH2 domain containing 1A [Source:MGI Symbol;Acc:MGI:1328352]	1	1	1	1	0	1	0	5	0	ENSG00000064545	54929	TMEM161A	transmembrane protein 161A [Source:HGNC Symbol;Acc:HGNC:26020]	46	54	47	50	64	58	40	80	43	47	44	44	47	60
ENSMUSG00000005698	13018	Ctcf	CCCTC-binding factor [Source:MGI Symbol;Acc:MGI:109447]	2144	1962	2806	1918	2271	2831	1759	2226	2619	ENSG00000064547	9170	LPAR2	lysophosphatidic acid receptor 2 [Source:HGNC Symbol;Acc:HGNC:3168]	189	227	27	34	174	189	272	451	242	252	272	320	238	274
ENSMUSG00000005699	56513	Pard6a	par-6 family cell polarity regulator alpha [Source:MGI Symbol;Acc:MGI:1927223]	59	42	48	46	53	57	77	57	52	ENSG00000064601	5476	CTSA	cathepsin A [Source:HGNC Symbol;Acc:HGNC:9251]	332	359	788	1151	149	163	188	236	211	220	173	185	128	168
ENSMUSG00000005705	11604	Agrp	agouti related neuropeptide [Source:MGI Symbol;Acc:MGI:892013]	1	0	0	0	1	0	4	0	0	ENSG00000064607	10147	SUGP2	SURP and G-patch domain containing 2 [Source:HGNC Symbol;Acc:HGNC:18641]	722	899	445	697	947	1039	911	1132	939	899	749	912	865	1005
ENSMUSG00000005716	19293	Pvalb	parvalbumin [Source:MGI Symbol;Acc:MGI:97821]	0	0	0	0	0	0	0	0	0	ENSG00000064651	6558	SLC12A2	solute carrier family 12 member 2 [Source:HGNC Symbol;Acc:HGNC:10911]	1211	1309	242	402	369	421	595	797	553	507	374	479	329	408
ENSMUSG00000005718	83383	Tfap4	transcription factor AP4 [Source:MGI Symbol;Acc:MGI:103239]	384	309	454	380	399	477	499	498	526	ENSG00000064652	28966	SNX24	sorting nexin 24 [Source:HGNC Symbol;Acc:HGNC:21533]	103	133	99	152	126	119	73	103	95	79	75	79	77	90
ENSMUSG00000005732	19385	Ranbp1	RAN binding protein 1 [Source:MGI Symbol;Acc:MGI:96269]	4969	4345	6989	4862	5632	6819	5001	6034	6994	ENSG00000064655	2139	EYA2	EYA transcriptional coactivator and phosphatase 2 [Source:HGNC Symbol;Acc:HGNC:3520]	72	82	107	178	3	6	49	75	8	12	4	1	4	1
ENSMUSG00000005763	12503	Cd247	CD247 antigen [Source:MGI Symbol;Acc:MGI:88334]	9	6	5	4	13	9	15	9	17	ENSG00000064666	1265	CNN2	calponin 2 [Source:HGNC Symbol;Acc:HGNC:2156]	981	1160	1404	2101	931	966	922	1428	1408	1355	1027	1136	881	999
ENSMUSG00000005774	53970	Rfx5	regulatory factor X, 5 (influences HLA class II expression) [Source:MGI Symbol;Acc:MGI:1858421]	219	219	225	172	196	223	206	296	208	ENSG00000064687	10347	ABCA7	ATP binding cassette subfamily A member 7 [Source:HGNC Symbol;Acc:HGNC:37]	40	42	20	23	47	39	43	63	58	48	36	41	54	69
ENSMUSG00000005779	19172	Psmb4	proteasome (prosome, macropain) subunit, beta type 4 [Source:MGI Symbol;Acc:MGI:1098257]	998	908	1485	1031	1147	1456	1009	1231	1557	ENSG00000064692	9627	SNCAIP	synuclein alpha interacting protein [Source:HGNC Symbol;Acc:HGNC:11139]	58	52	76	122	283	308	173	276	156	132	167	203	122	128
ENSMUSG00000005800	17394	Mmp8	matrix metallopeptidase 8 [Source:MGI Symbol;Acc:MGI:1202395]	0	0	0	2	0	0	0	0	0	ENSG00000064703	11218	DDX20	DEAD-box helicase 20 [Source:HGNC Symbol;Acc:HGNC:2743]	162	198	78	152	173	234	191	239	165	167	124	134	178	209
ENSMUSG00000005802	22785	Slc30a4	solute carrier family 30 (zinc transporter), member 4 [Source:MGI Symbol;Acc:MGI:1345282]	388	331	485	360	391	479	459	421	488	ENSG00000064726	53339	BTBD1	BTB domain containing 1 [Source:HGNC Symbol;Acc:HGNC:1120]	288	401	337	532	377	364	368	463	342	296	251	301	331	345
ENSMUSG00000005803	59010	Sqor	sulfide quinone oxidoreductase [Source:MGI Symbol;Acc:MGI:1929899]	10	7	4	9	14	12	5	9	14	ENSG00000064763	55711	FAR2	fatty acyl-CoA reductase 2 [Source:HGNC Symbol;Acc:HGNC:25531]	61	61	271	446	37	50	120	121	112	84	40	54	63	60
ENSMUSG00000005804	18457	Bloc1s6	biogenesis of lysosomal organelles complex-1, subunit 6, pallidin [Source:MGI Symbol;Acc:MGI:1927580]	230	264	345	233	263	352	338	289	359	ENSG00000064787	8537	BCAS1	breast carcinoma amplified sequence 1 [Source:HGNC Symbol;Acc:HGNC:974]	3	2	0	0	5	13	6	5	8	7	17	12	10	7
ENSMUSG00000005813	75624	Metap1	methionyl aminopeptidase 1 [Source:MGI Symbol;Acc:MGI:1922874]	651	607	885	742	787	882	747	780	861	ENSG00000064835	5449	POU1F1	POU class 1 homeobox 1 [Source:HGNC Symbol;Acc:HGNC:9210]	0	0	0	0	0	1	0	0	0	0	1	1	0	0
ENSMUSG00000005823	78308	Gpr108	G protein-coupled receptor 108 [Source:MGI Symbol;Acc:MGI:1925558]	90	116	143	116	121	173	173	122	151	ENSG00000064886	1117	CHI3L2	chitinase 3 like 2 [Source:HGNC Symbol;Acc:HGNC:1933]	1	0	1	1	0	1	0	0	0	0	1	1	1	0
ENSMUSG00000005824	50930	Tnfsf14	tumor necrosis factor (ligand) superfamily, member 14 [Source:MGI Symbol;Acc:MGI:1355317]	2	1	5	0	1	3	0	1	0	ENSG00000064932	22904	SBNO2	strawberry notch homolog 2 [Source:HGNC Symbol;Acc:HGNC:29158]	113	128	316	451	160	154	136	238	137	159	98	151	140	167
ENSMUSG00000005836	14465	Gata6	GATA binding protein 6 [Source:MGI Symbol;Acc:MGI:107516]	22	4	11	10	36	8	45	50	22	ENSG00000064933	5378	PMS1	PMS1 homolog 1, mismatch repair system component [Source:HGNC Symbol;Acc:HGNC:9121]	105	142	79	123	132	197	178	235	154	155	133	138	153	182
ENSMUSG00000005846	66409	Rsl1d1	ribosomal L1 domain containing 1 [Source:MGI Symbol;Acc:MGI:1913659]	2296	2024	3387	2444	3006	3601	2544	2866	3574	ENSG00000064961	10362	HMG20B	high mobility group 20B [Source:HGNC Symbol;Acc:HGNC:5002]	116	156	126	195	116	157	167	172	167	156	107	148	169	195
ENSMUSG00000005864	12789	Cnga2	cyclic nucleotide gated channel alpha 2 [Source:MGI Symbol;Acc:MGI:108040]	0	1	3	0	1	2	1	0	0	ENSG00000064989	10203	CALCRL	calcitonin receptor like receptor [Source:HGNC Symbol;Acc:HGNC:16709]	45	64	58	78	50	52	268	399	73	65	100	102	50	67
ENSMUSG00000005871	11789	Apc	APC, WNT signaling pathway regulator [Source:MGI Symbol;Acc:MGI:88039]	3608	2955	4679	3331	3778	4272	4336	4533	4825	ENSG00000064995	6882	TAF11	TATA-box binding protein associated factor 11 [Source:HGNC Symbol;Acc:HGNC:11544]	88	101	59	95	90	107	115	105	71	87	73	98	79	87
ENSMUSG00000005873	13476	Reep5	receptor accessory protein 5 [Source:MGI Symbol;Acc:MGI:1270152]	267	243	338	253	302	324	285	259	311	ENSG00000064999	23294	ANKS1A	ankyrin repeat and sterile alpha motif domain containing 1A [Source:HGNC Symbol;Acc:HGNC:20961]	238	265	163	294	361	391	486	658	407	390	345	376	355	379
ENSMUSG00000005881	66366	Ergic3	ERGIC and golgi 3 [Source:MGI Symbol;Acc:MGI:1913616]	588	526	843	544	655	809	824	808	1060	ENSG00000065000	8943	AP3D1	adaptor related protein complex 3 subunit delta 1 [Source:HGNC Symbol;Acc:HGNC:568]	1190	1374	1141	1659	1364	1490	1294	1969	1187	1167	1002	1120	938	1038
ENSMUSG00000005882	56046	Uqcc1	ubiquinol-cytochrome c reductase complex assembly factor 1 [Source:MGI Symbol;Acc:MGI:1929472]	387	336	496	369	376	530	435	453	495	ENSG00000065029	7629	ZNF76	zinc finger protein 76 [Source:HGNC Symbol;Acc:HGNC:13149]	95	106	55	124	162	172	121	165	147	134	125	142	118	134
ENSMUSG00000005883	26972	Spo11	SPO11 meiotic protein covalently bound to DSB [Source:MGI Symbol;Acc:MGI:1349669]	13	5	7	4	7	4	9	8	3	ENSG00000065054	9351	SLC9A3R2	SLC9A3 regulator 2 [Source:HGNC Symbol;Acc:HGNC:11076]	17	22	73	132	23	21	56	102	37	53	28	34	30	42
ENSMUSG00000005886	17978	Ncoa2	nuclear receptor coactivator 2 [Source:MGI Symbol;Acc:MGI:1276533]	1691	1446	2005	1515	1679	1913	1713	1785	2029	ENSG00000065057	4913	NTHL1	nth like DNA glycosylase 1 [Source:HGNC Symbol;Acc:HGNC:8028]	13	33	7	11	27	36	29	42	18	27	17	18	17	22
ENSMUSG00000005891	19110	Prl4a1	prolactin family 4, subfamily a, member 1 [Source:MGI Symbol;Acc:MGI:1206587]	0	0	0	0	0	0	0	0	0	ENSG00000065060	54887	UHRF1BP1	UHRF1 binding protein 1 [Source:HGNC Symbol;Acc:HGNC:21216]	460	532	484	803	689	676	576	821	560	540	465	513	449	521
ENSMUSG00000005892	22044	Trh	thyrotropin releasing hormone [Source:MGI Symbol;Acc:MGI:98823]	7	2	9	14	3	8	6	14	19	ENSG00000065135	2773	GNAI3	G protein subunit alpha i3 [Source:HGNC Symbol;Acc:HGNC:4387]	807	884	674	982	834	930	923	1178	948	843	650	711	726	842
ENSMUSG00000005893	22026	Nr2c2	nuclear receptor subfamily 2, group C, member 2 [Source:MGI Symbol;Acc:MGI:1352466]	1162	1003	1215	898	1044	1188	1043	1318	1312	ENSG00000065150	3843	IPO5	importin 5 [Source:HGNC Symbol;Acc:HGNC:6402]	1841	2173	1257	1953	2741	3010	2675	3337	2138	2155	1748	1872	1746	2019
ENSMUSG00000005897	22025	Nr2c1	nuclear receptor subfamily 2, group C, member 1 [Source:MGI Symbol;Acc:MGI:1352465]	283	243	351	308	310	382	470	336	357	ENSG00000065154	4942	OAT	ornithine aminotransferase [Source:HGNC Symbol;Acc:HGNC:8091]	128	182	263	455	149	145	119	140	140	146	96	115	70	75
ENSMUSG00000005899	77626	Smpd4	sphingomyelin phosphodiesterase 4 [Source:MGI Symbol;Acc:MGI:1924876]	1102	955	1432	1056	1103	1305	828	1226	1258	ENSG00000065183	10885	WDR3	WD repeat domain 3 [Source:HGNC Symbol;Acc:HGNC:12755]	196	201	97	123	190	205	184	266	139	164	141	164	196	245
ENSMUSG00000005907	71382	Pex1	peroxisomal biogenesis factor 1 [Source:MGI Symbol;Acc:MGI:1918632]	274	214	299	230	214	296	277	267	285	ENSG00000065243	5586	PKN2	protein kinase N2 [Source:HGNC Symbol;Acc:HGNC:9406]	474	541	322	561	617	668	588	819	620	556	464	546	667	756
ENSMUSG00000005917	18423	Otx1	orthodenticle homeobox 1 [Source:MGI Symbol;Acc:MGI:97450]	871	804	1184	846	1048	1012	957	1003	1198	ENSG00000065268	57418	WDR18	WD repeat domain 18 [Source:HGNC Symbol;Acc:HGNC:17956]	138	162	99	177	174	196	132	195	133	159	130	138	105	127
ENSMUSG00000005936	66989	Kctd20	potassium channel tetramerisation domain containing 20 [Source:MGI Symbol;Acc:MGI:1914239]	1383	1162	1645	1281	1368	1669	1240	1492	1670	ENSG00000065308	9697	TRAM2	translocation associated membrane protein 2 [Source:HGNC Symbol;Acc:HGNC:16855]	690	777	1445	2133	331	387	432	609	651	691	360	441	221	289
ENSMUSG00000005947	16407	Itgae	integrin alpha E, epithelial-associated [Source:MGI Symbol;Acc:MGI:1298377]	17	8	14	11	8	14	19	15	6	ENSG00000065320	9423	NTN1	netrin 1 [Source:HGNC Symbol;Acc:HGNC:8029]	221	288	459	784	1168	1312	391	537	473	498	467	522	423	458
ENSMUSG00000005949	83429	Ctns	cystinosis, nephropathic [Source:MGI Symbol;Acc:MGI:1932872]	139	135	150	110	121	156	190	165	203	ENSG00000065325	9340	GLP2R	glucagon like peptide 2 receptor [Source:HGNC Symbol;Acc:HGNC:4325]	0	0	0	1	1	0	1	1	5	1	2	1	1	0
ENSMUSG00000005950	94045	P2rx5	purinergic receptor P2X, ligand-gated ion channel, 5 [Source:MGI Symbol;Acc:MGI:2137026]	7	13	10	4	16	8	7	7	3	ENSG00000065328	55388	MCM10	minichromosome maintenance 10 replication initiation factor [Source:HGNC Symbol;Acc:HGNC:18043]	285	366	57	63	335	369	293	360	212	242	181	206	143	131
ENSMUSG00000005951	74637	Shpk	sedoheptulokinase [Source:MGI Symbol;Acc:MGI:1921887]	7	9	4	0	4	9	23	6	9	ENSG00000065357	1606	DGKA	diacylglycerol kinase alpha [Source:HGNC Symbol;Acc:HGNC:2849]	84	95	151	270	63	61	86	100	111	85	87	94	46	65
ENSMUSG00000005952	193034	Trpv1	transient receptor potential cation channel, subfamily V, member 1 [Source:MGI Symbol;Acc:MGI:1341787]	0	0	0	0	0	0	0	5	0	ENSG00000065361	2065	ERBB3	erb-b2 receptor tyrosine kinase 3 [Source:HGNC Symbol;Acc:HGNC:3431]	216	242	7	5	8	13	174	259	26	18	11	10	39	39
ENSMUSG00000005958	13845	Ephb3	Eph receptor B3 [Source:MGI Symbol;Acc:MGI:104770]	765	694	844	666	707	884	863	805	744	ENSG00000065371	54763	ROPN1	rhophilin associated tail protein 1 [Source:HGNC Symbol;Acc:HGNC:17692]	0	1	0	1	1	5	2	0	4	3	5	0	1	0
ENSMUSG00000005968	22156	Tuft1	tuftelin 1 [Source:MGI Symbol;Acc:MGI:109572]	39	35	33	18	32	49	38	42	33	ENSG00000065413	91526	ANKRD44	ankyrin repeat domain 44 [Source:HGNC Symbol;Acc:HGNC:25259]	88	113	364	508	40	40	169	259	98	70	67	62	36	37
ENSMUSG00000005973	19672	Rcn1	reticulocalbin 1 [Source:MGI Symbol;Acc:MGI:104559]	762	722	1086	911	828	1130	945	992	1275	ENSG00000065427	3735	KARS	lysyl-tRNA synthetase [Source:HGNC Symbol;Acc:HGNC:6215]	693	841	510	898	643	757	913	1257	691	654	529	580	525	586
ENSMUSG00000005980	13419	Dnase1	deoxyribonuclease I [Source:MGI Symbol;Acc:MGI:103157]	149	107	128	146	105	89	95	108	111	ENSG00000065457	23536	ADAT1	adenosine deaminase tRNA specific 1 [Source:HGNC Symbol;Acc:HGNC:228]	153	201	113	165	142	169	156	232	158	147	106	139	88	109
ENSMUSG00000005981	68015	Trap1	TNF receptor-associated protein 1 [Source:MGI Symbol;Acc:MGI:1915265]	1006	864	1183	884	1009	1227	1339	1243	1557	ENSG00000065485	10954	PDIA5	protein disulfide isomerase family A member 5 [Source:HGNC Symbol;Acc:HGNC:24811]	77	100	258	420	70	66	98	106	85	88	47	59	54	61
ENSMUSG00000005982	74763	Naa60	N(alpha)-acetyltransferase 60, NatF catalytic subunit [Source:MGI Symbol;Acc:MGI:1922013]	547	408	635	474	532	612	486	546	543	ENSG00000065491	55633	TBC1D22B	TBC1 domain family member 22B [Source:HGNC Symbol;Acc:HGNC:21602]	58	77	102	169	100	91	85	100	94	100	70	70	89	95
ENSMUSG00000005983	73261	1700037C18Rik	RIKEN cDNA 1700037C18 gene [Source:MGI Symbol;Acc:MGI:1920511]	25	45	44	19	15	24	54	35	37	ENSG00000065518	4710	NDUFB4	NADH:ubiquinone oxidoreductase subunit B4 [Source:HGNC Symbol;Acc:HGNC:7699]	134	161	61	98	117	134	121	184	149	148	111	141	120	155
ENSMUSG00000005986	68423	Ankrd13d	ankyrin repeat domain 13 family, member D [Source:MGI Symbol;Acc:MGI:1915673]	64	30	49	20	27	35	50	33	33	ENSG00000065526	23013	SPEN	spen family transcriptional repressor [Source:HGNC Symbol;Acc:HGNC:17575]	1271	1512	870	1344	1590	1650	1746	2542	1547	1566	1371	1487	2031	2367
ENSMUSG00000005994	22178	Tyrp1	tyrosinase-related protein 1 [Source:MGI Symbol;Acc:MGI:98881]	2	0	0	0	0	0	0	2	1	ENSG00000065534	4638	MYLK	myosin light chain kinase [Source:HGNC Symbol;Acc:HGNC:7590]	129	144	631	993	313	387	264	388	302	280	207	205	210	211
ENSMUSG00000006005	108989	Tpr	translocated promoter region, nuclear basket protein [Source:MGI Symbol;Acc:MGI:1922066]	5471	4454	6666	5184	5901	6779	6958	6815	7631	ENSG00000065548	55854	ZC3H15	zinc finger CCCH-type containing 15 [Source:HGNC Symbol;Acc:HGNC:29528]	259	305	189	301	332	308	326	424	281	242	215	232	188	224
ENSMUSG00000006007	20028	Pdc	phosducin [Source:MGI Symbol;Acc:MGI:98090]	1	1	0	0	3	0	0	0	1	ENSG00000065559	6416	MAP2K4	mitogen-activated protein kinase kinase 4 [Source:HGNC Symbol;Acc:HGNC:6844]	297	319	241	396	378	413	436	516	420	391	324	401	276	282
ENSMUSG00000006010	226499	Odr4	odr4 GPCR localization factor homolog [Source:MGI Symbol;Acc:MGI:2385108]	177	145	209	191	197	211	385	304	324	ENSG00000065600	55248	PACC1	proton activated chloride channel 1 [Source:HGNC Symbol;Acc:HGNC:25593]	105	107	57	98	183	182	131	246	183	150	145	182	200	217
ENSMUSG00000006014	96875	Prg4	proteoglycan 4 (megakaryocyte stimulating factor, articular superficial zone protein) [Source:MGI Symbol;Acc:MGI:1891344]	12	5	11	11	20	3	14	15	8	ENSG00000065609	9892	SNAP91	synaptosome associated protein 91 [Source:HGNC Symbol;Acc:HGNC:14986]	44	57	0	2	11	7	51	73	86	70	15	17	46	52
ENSMUSG00000006019	71723	Dhx34	DEAH (Asp-Glu-Ala-His) box polypeptide 34 [Source:MGI Symbol;Acc:MGI:1918973]	377	254	383	306	335	346	449	383	428	ENSG00000065613	9748	SLK	STE20 like kinase [Source:HGNC Symbol;Acc:HGNC:11088]	571	777	345	582	629	716	576	692	442	468	361	396	356	406
ENSMUSG00000006021	70394	Kptn	kaptin [Source:MGI Symbol;Acc:MGI:1890380]	63	57	88	64	74	70	74	80	76	ENSG00000065615	51167	CYB5R4	cytochrome b5 reductase 4 [Source:HGNC Symbol;Acc:HGNC:20147]	71	94	40	67	105	117	82	119	94	100	74	95	56	66
ENSMUSG00000006024	108124	Napa	N-ethylmaleimide sensitive fusion protein attachment protein alpha [Source:MGI Symbol;Acc:MGI:104563]	656	551	781	591	609	798	750	777	844	ENSG00000065618	1308	COL17A1	collagen type XVII alpha 1 chain [Source:HGNC Symbol;Acc:HGNC:2194]	6	6	1	6	17	16	8	12	7	9	11	5	6	9
ENSMUSG00000006050	24068	Sra1	steroid receptor RNA activator 1 [Source:MGI Symbol;Acc:MGI:1344414]	162	173	215	194	196	213	185	209	268	ENSG00000065621	119391	GSTO2	glutathione S-transferase omega 2 [Source:HGNC Symbol;Acc:HGNC:23064]	10	10	4	6	9	12	14	10	16	15	14	10	10	11
ENSMUSG00000006056	76815	Calcoco2	calcium binding and coiled-coil domain 2 [Source:MGI Symbol;Acc:MGI:1343177]	0	0	0	0	0	0	0	0	0	ENSG00000065665	55176	SEC61A2	SEC61 translocon alpha 2 subunit [Source:HGNC Symbol;Acc:HGNC:17702]	215	262	50	81	215	242	171	224	175	176	152	163	159	199
ENSMUSG00000006057	11951	Atp5g1	ATP synthase, H+ transporting, mitochondrial F0 complex, subunit C1 (subunit 9) [Source:MGI Symbol;Acc:MGI:107653]	485	376	639	468	485	682	381	526	669	ENSG00000065675	5588	PRKCQ	protein kinase C theta [Source:HGNC Symbol;Acc:HGNC:9410]	3	1	14	24	6	7	12	17	7	3	3	8	25	27
ENSMUSG00000006058	27681	Snf8	SNF8, ESCRT-II complex subunit, homolog (S. cerevisiae) [Source:MGI Symbol;Acc:MGI:1343161]	332	258	435	325	354	419	243	364	404	ENSG00000065717	7089	TLE2	TLE family member 2, transcriptional corepressor [Source:HGNC Symbol;Acc:HGNC:11838]	109	138	90	118	4	8	41	52	47	37	21	27	11	13
ENSMUSG00000006095	66411	Tbcb	tubulin folding cofactor B [Source:MGI Symbol;Acc:MGI:1913661]	448	376	657	429	458	629	378	423	516	ENSG00000065802	51665	ASB1	ankyrin repeat and SOCS box containing 1 [Source:HGNC Symbol;Acc:HGNC:16011]	244	285	152	254	253	248	226	300	199	179	184	187	203	205
ENSMUSG00000006127	19062	Inpp5k	inositol polyphosphate 5-phosphatase K [Source:MGI Symbol;Acc:MGI:1194899]	92	93	121	111	103	116	108	130	125	ENSG00000065809	83641	FAM107B	family with sequence similarity 107 member B [Source:HGNC Symbol;Acc:HGNC:23726]	196	203	65	90	213	198	216	303	243	217	198	178	120	153
ENSMUSG00000006134	12929	Crkl	v-crk avian sarcoma virus CT10 oncogene homolog-like [Source:MGI Symbol;Acc:MGI:104686]	1833	1506	2295	1660	1848	2324	1705	1937	2266	ENSG00000065833	4199	ME1	malic enzyme 1 [Source:HGNC Symbol;Acc:HGNC:6983]	141	153	147	227	2	6	6	18	25	23	30	24	7	5
ENSMUSG00000006143	69665	Upk3bl	uroplakin 3B-like [Source:MGI Symbol;Acc:MGI:1916915]	14	11	11	10	8	23	20	11	25	ENSG00000065882	23216	TBC1D1	TBC1 domain family member 1 [Source:HGNC Symbol;Acc:HGNC:11578]	389	478	255	398	274	330	556	829	427	381	308	309	307	364
ENSMUSG00000006154	67425	Eps8l1	EPS8-like 1 [Source:MGI Symbol;Acc:MGI:1914675]	45	30	54	27	16	56	34	55	43	ENSG00000065883	8621	CDK13	cyclin dependent kinase 13 [Source:HGNC Symbol;Acc:HGNC:1733]	768	924	579	956	939	1017	892	1218	887	846	748	779	797	974
ENSMUSG00000006169	216705	Clint1	clathrin interactor 1 [Source:MGI Symbol;Acc:MGI:2144243]	1844	1524	2275	1724	2011	2300	1732	1883	2491	ENSG00000065911	10797	MTHFD2	methylenetetrahydrofolate dehydrogenase (NADP+ dependent) 2, methenyltetrahydrofolate cyclohydrolase [Source:HGNC Symbol;Acc:HGNC:7434]	460	523	514	795	238	271	355	439	357	376	195	259	207	235
ENSMUSG00000006179	54373	Prss16	protease, serine 16 (thymus) [Source:MGI Symbol;Acc:MGI:1859181]	0	3	2	4	8	2	2	5	0	ENSG00000065923	84679	SLC9A7	solute carrier family 9 member A7 [Source:HGNC Symbol;Acc:HGNC:17123]	147	178	189	235	131	131	80	114	184	151	93	86	115	116
ENSMUSG00000006191	68916	Cdkal1	CDK5 regulatory subunit associated protein 1-like 1 [Source:MGI Symbol;Acc:MGI:1921765]	349	266	382	314	270	377	425	465	480	ENSG00000065970	55810	FOXJ2	forkhead box J2 [Source:HGNC Symbol;Acc:HGNC:24818]	219	237	225	466	222	199	272	430	276	216	170	182	172	214
ENSMUSG00000006200	19202	Rhox6	reproductive homeobox 6 [Source:MGI Symbol;Acc:MGI:1202888]	0	0	4	0	0	0	0	0	0	ENSG00000065978	4904	YBX1	Y-box binding protein 1 [Source:HGNC Symbol;Acc:HGNC:8014]	1438	1718	900	1296	2095	2307	1939	2416	1715	1638	1358	1508	1922	2104
ENSMUSG00000006204	71395	5430419D17Rik	RIKEN cDNA 5430419D17 gene [Source:MGI Symbol;Acc:MGI:1918645]	0	2	0	3	0	0	0	2	0	ENSG00000065989	5141	PDE4A	phosphodiesterase 4A [Source:HGNC Symbol;Acc:HGNC:8780]	16	14	29	56	28	18	60	69	49	32	17	32	31	35
ENSMUSG00000006205	56213	Htra1	HtrA serine peptidase 1 [Source:MGI Symbol;Acc:MGI:1929076]	13	4	13	12	11	10	19	12	17	ENSG00000066027	5525	PPP2R5A	protein phosphatase 2 regulatory subunit B'alpha [Source:HGNC Symbol;Acc:HGNC:9309]	94	110	64	113	85	90	88	113	69	99	61	66	108	132
ENSMUSG00000006215	22642	Zbtb17	zinc finger and BTB domain containing 17 [Source:MGI Symbol;Acc:MGI:107410]	400	371	519	385	379	460	403	503	484	ENSG00000066032	1496	CTNNA2	catenin alpha 2 [Source:HGNC Symbol;Acc:HGNC:2510]	30	26	0	3	102	108	68	94	290	284	270	292	348	358
ENSMUSG00000006216	56365	Clcnkb	chloride channel, voltage-sensitive Kb [Source:MGI Symbol;Acc:MGI:1930643]	0	0	0	0	0	0	0	1	0	ENSG00000066044	1994	ELAVL1	ELAV like RNA binding protein 1 [Source:HGNC Symbol;Acc:HGNC:3312]	758	942	399	668	969	1037	1004	1276	804	806	714	760	612	765
ENSMUSG00000006218	277743	Fam131c	family with sequence similarity 131, member C [Source:MGI Symbol;Acc:MGI:2685539]	7	2	6	2	5	1	1	2	1	ENSG00000066056	7075	TIE1	tyrosine kinase with immunoglobulin like and EGF like domains 1 [Source:HGNC Symbol;Acc:HGNC:11809]	1	2	6	16	7	6	7	2	12	12	8	13	9	16
ENSMUSG00000006219	74202	Fblim1	filamin binding LIM protein 1 [Source:MGI Symbol;Acc:MGI:1921452]	278	245	285	199	213	324	400	340	328	ENSG00000066084	57609	DIP2B	disco interacting protein 2 homolog B [Source:HGNC Symbol;Acc:HGNC:29284]	1011	1180	533	871	807	936	836	1203	805	780	640	717	609	671
ENSMUSG00000006221	29818	Hspb7	heat shock protein family, member 7 (cardiovascular) [Source:MGI Symbol;Acc:MGI:1352494]	3	0	1	1	2	0	0	1	0	ENSG00000066117	6602	SMARCD1	SWI/SNF related, matrix associated, actin dependent regulator of chromatin, subfamily d, member 1 [Source:HGNC Symbol;Acc:HGNC:11106]	684	800	279	470	1172	1193	897	1254	1036	1020	876	967	970	1118
ENSMUSG00000006235	13857	Epor	erythropoietin receptor [Source:MGI Symbol;Acc:MGI:95408]	45	40	30	29	33	61	34	40	31	ENSG00000066135	9682	KDM4A	lysine demethylase 4A [Source:HGNC Symbol;Acc:HGNC:22978]	304	389	303	455	386	429	356	448	412	413	344	421	588	655
ENSMUSG00000006241	67119	Ccdc159	coiled-coil domain containing 159 [Source:MGI Symbol;Acc:MGI:1914369]	4	6	11	7	3	13	14	12	8	ENSG00000066136	4802	NFYC	nuclear transcription factor Y subunit gamma [Source:HGNC Symbol;Acc:HGNC:7806]	339	349	217	329	368	435	388	543	367	345	323	362	365	437
ENSMUSG00000006262	68473	Mob1b	MOB kinase activator 1B [Source:MGI Symbol;Acc:MGI:1915723]	952	868	1051	726	916	968	612	853	830	ENSG00000066185	84217	ZMYND12	zinc finger MYND-type containing 12 [Source:HGNC Symbol;Acc:HGNC:21192]	0	0	1	1	0	1	0	1	0	0	1	2	0	1
ENSMUSG00000006269	110935	Atp6v1b1	ATPase, H+ transporting, lysosomal V1 subunit B1 [Source:MGI Symbol;Acc:MGI:103285]	10	5	2	10	2	5	8	1	2	ENSG00000066230	6550	SLC9A3	solute carrier family 9 member A3 [Source:HGNC Symbol;Acc:HGNC:11073]	44	47	46	59	50	58	75	87	38	60	43	49	42	45
ENSMUSG00000006270	22326	Vax1	ventral anterior homeobox 1 [Source:MGI Symbol;Acc:MGI:1277163]	129	93	149	97	90	170	52	91	106	ENSG00000066248	25791	NGEF	neuronal guanine nucleotide exchange factor [Source:HGNC Symbol;Acc:HGNC:7807]	8	21	6	1	9	7	38	61	10	7	4	5	8	20
ENSMUSG00000006273	11966	Atp6v1b2	ATPase, H+ transporting, lysosomal V1 subunit B2 [Source:MGI Symbol;Acc:MGI:109618]	921	811	1232	837	963	1232	1134	985	1323	ENSG00000066279	259266	ASPM	abnormal spindle microtubule assembly [Source:HGNC Symbol;Acc:HGNC:19048]	1057	1300	534	820	1422	1500	1573	2120	1663	1638	1475	1724	1943	2227
ENSMUSG00000006276	13859	Eps15l1	epidermal growth factor receptor pathway substrate 15-like 1 [Source:MGI Symbol;Acc:MGI:104582]	1308	1102	1338	1151	1178	1457	1524	1490	1565	ENSG00000066294	8832	CD84	CD84 molecule [Source:HGNC Symbol;Acc:HGNC:1704]	4	2	2	0	0	1	2	1	12	5	4	1	0	0
ENSMUSG00000006281	21745	Tep1	telomerase associated protein 1 [Source:MGI Symbol;Acc:MGI:109573]	221	164	226	125	205	246	331	224	293	ENSG00000066322	64834	ELOVL1	ELOVL fatty acid elongase 1 [Source:HGNC Symbol;Acc:HGNC:14418]	115	121	329	530	174	103	99	157	103	110	77	102	80	122
ENSMUSG00000006288	219022	Ttc5	tetratricopeptide repeat domain 5 [Source:MGI Symbol;Acc:MGI:2683584]	346	331	455	341	320	407	433	424	417	ENSG00000066336	6688	SPI1	Spi-1 proto-oncogene [Source:HGNC Symbol;Acc:HGNC:11241]	0	3	1	0	0	0	0	1	0	2	1	1	1	0
ENSMUSG00000006289	66246	Osgep	O-sialoglycoprotein endopeptidase [Source:MGI Symbol;Acc:MGI:1913496]	393	316	439	324	391	449	478	483	467	ENSG00000066379	30834	ZNRD1	zinc ribbon domain containing 1 [Source:HGNC Symbol;Acc:HGNC:13182]	23	28	30	24	35	31	38	47	39	38	34	45	27	49
ENSMUSG00000006299	227290	Aamp	angio-associated migratory protein [Source:MGI Symbol;Acc:MGI:107809]	792	723	1092	845	897	1102	941	1056	1161	ENSG00000066382	744	MPPED2	metallophosphoesterase domain containing 2 [Source:HGNC Symbol;Acc:HGNC:1180]	138	148	4	13	14	10	214	353	241	193	33	48	47	65
ENSMUSG00000006301	69660	Tmbim1	transmembrane BAX inhibitor motif containing 1 [Source:MGI Symbol;Acc:MGI:1916910]	197	151	164	174	145	130	260	208	187	ENSG00000066405	51208	CLDN18	claudin 18 [Source:HGNC Symbol;Acc:HGNC:2039]	22	31	12	23	25	24	27	21	20	27	22	28	33	41
ENSMUSG00000006304	76709	Arpc2	actin related protein 2/3 complex, subunit 2 [Source:MGI Symbol;Acc:MGI:1923959]	1644	1460	2295	1568	1809	2359	2154	2216	2779	ENSG00000066422	27107	ZBTB11	zinc finger and BTB domain containing 11 [Source:HGNC Symbol;Acc:HGNC:16740]	164	202	149	222	176	185	162	236	178	180	137	174	157	170
ENSMUSG00000006307	75410	Kmt2b	lysine (K)-specific methyltransferase 2B [Source:MGI Symbol;Acc:MGI:109565]	2189	1908	2233	1932	2102	2339	2160	2444	2720	ENSG00000066427	4287	ATXN3	ataxin 3 [Source:HGNC Symbol;Acc:HGNC:7106]	116	129	95	138	212	195	209	240	186	169	166	187	231	245
ENSMUSG00000006310	58206	Zbtb32	zinc finger and BTB domain containing 32 [Source:MGI Symbol;Acc:MGI:1891838]	1	5	3	2	2	1	6	1	4	ENSG00000066455	9950	GOLGA5	golgin A5 [Source:HGNC Symbol;Acc:HGNC:4428]	135	132	249	445	135	169	176	224	150	172	120	108	131	147
ENSMUSG00000006311	14008	Etv2	ets variant 2 [Source:MGI Symbol;Acc:MGI:99253]	5	0	3	1	0	0	0	0	1	ENSG00000066468	2263	FGFR2	fibroblast growth factor receptor 2 [Source:HGNC Symbol;Acc:HGNC:3689]	51	65	2	2	268	310	232	388	299	327	437	495	985	1148
ENSMUSG00000006313	109637	Upk1a	uroplakin 1A [Source:MGI Symbol;Acc:MGI:98911]	0	3	5	1	8	7	4	0	8	ENSG00000066557	55631	LRRC40	leucine rich repeat containing 40 [Source:HGNC Symbol;Acc:HGNC:26004]	226	306	129	197	296	349	269	424	299	288	257	288	322	362
ENSMUSG00000006315	69804	Tmem147	transmembrane protein 147 [Source:MGI Symbol;Acc:MGI:1915011]	194	226	310	262	239	334	177	242	348	ENSG00000066583	51015	ISOC1	isochorismatase domain containing 1 [Source:HGNC Symbol;Acc:HGNC:24254]	43	59	20	29	80	86	61	86	39	39	39	41	41	51
ENSMUSG00000006333	76846	Rps9	ribosomal protein S9 [Source:MGI Symbol;Acc:MGI:1924096]	5764	5292	8499	5985	6451	8298	6926	7223	9395	ENSG00000066629	2009	EML1	EMAP like 1 [Source:HGNC Symbol;Acc:HGNC:3330]	209	218	159	239	222	216	233	315	233	194	174	189	191	194
ENSMUSG00000006335	69714	Tfpt	TCF3 (E2A) fusion partner [Source:MGI Symbol;Acc:MGI:1916964]	86	83	109	76	109	116	106	94	152	ENSG00000066651	60487	TRMT11	tRNA methyltransferase 11 homolog [Source:HGNC Symbol;Acc:HGNC:21080]	80	81	42	77	122	148	108	146	90	103	84	111	95	115
ENSMUSG00000006342	71733	Susd2	sushi domain containing 2 [Source:MGI Symbol;Acc:MGI:1918983]	10	7	15	12	10	11	18	6	15	ENSG00000066654	55623	THUMPD1	THUMP domain containing 1 [Source:HGNC Symbol;Acc:HGNC:23807]	185	256	197	258	238	254	257	347	246	257	200	215	213	228
ENSMUSG00000006344	23887	Ggt5	gamma-glutamyltransferase 5 [Source:MGI Symbol;Acc:MGI:1346063]	0	0	0	3	1	0	2	6	0	ENSG00000066697	91283	MSANTD3	Myb/SANT DNA binding domain containing 3 [Source:HGNC Symbol;Acc:HGNC:23370]	112	112	122	199	125	150	126	175	148	142	121	143	101	110
ENSMUSG00000006345	14598	Ggt1	gamma-glutamyltransferase 1 [Source:MGI Symbol;Acc:MGI:95706]	9	5	11	18	12	21	15	13	17	ENSG00000066735	26153	KIF26A	kinesin family member 26A [Source:HGNC Symbol;Acc:HGNC:20226]	73	78	40	61	332	342	112	122	184	187	120	121	221	267
ENSMUSG00000006356	68337	Crip2	cysteine rich protein 2 [Source:MGI Symbol;Acc:MGI:1915587]	296	260	311	253	284	329	212	263	339	ENSG00000066739	55102	ATG2B	autophagy related 2B [Source:HGNC Symbol;Acc:HGNC:20187]	444	428	364	552	472	492	489	608	519	464	423	489	411	497
ENSMUSG00000006360	12925	Crip1	cysteine-rich protein 1 (intestinal) [Source:MGI Symbol;Acc:MGI:88501]	24	19	21	18	20	25	16	34	27	ENSG00000066777	10565	ARFGEF1	ADP ribosylation factor guanine nucleotide exchange factor 1 [Source:HGNC Symbol;Acc:HGNC:15772]	622	766	553	842	699	827	757	1035	742	693	561	737	555	605
ENSMUSG00000006362	12398	Cbfa2t3	CBFA2/RUNX1 translocation partner 3 [Source:MGI Symbol;Acc:MGI:1338013]	78	69	112	55	72	126	86	108	70	ENSG00000066813	348158	ACSM2B	acyl-CoA synthetase medium chain family member 2B [Source:HGNC Symbol;Acc:HGNC:30931]	2	5	0	0	2	4	6	0	4	4	5	1	2	1
ENSMUSG00000006369	14114	Fbln1	fibulin 1 [Source:MGI Symbol;Acc:MGI:95487]	1603	1403	2012	1465	1700	2132	2111	2120	2581	ENSG00000066827	57623	ZFAT	zinc finger and AT-hook domain containing [Source:HGNC Symbol;Acc:HGNC:19899]	116	126	72	94	83	84	107	151	91	76	79	77	77	92
ENSMUSG00000006373	53328	Pgrmc1	progesterone receptor membrane component 1 [Source:MGI Symbol;Acc:MGI:1858305]	1487	1288	1871	1401	1545	1927	1799	2019	2125	ENSG00000066855	9650	MTFR1	mitochondrial fission regulator 1 [Source:HGNC Symbol;Acc:HGNC:29510]	91	112	106	139	134	132	145	228	130	133	141	136	118	134
ENSMUSG00000006378	26912	Gcat	glycine C-acetyltransferase (2-amino-3-ketobutyrate-coenzyme A ligase) [Source:MGI Symbol;Acc:MGI:1349389]	156	194	331	225	179	343	307	266	443	ENSG00000066923	10734	STAG3	stromal antigen 3 [Source:HGNC Symbol;Acc:HGNC:11356]	108	146	68	94	172	227	183	296	238	228	191	242	198	270
ENSMUSG00000006386	21687	Tek	TEK receptor tyrosine kinase [Source:MGI Symbol;Acc:MGI:98664]	214	137	224	157	210	245	236	251	283	ENSG00000066926	2235	FECH	ferrochelatase [Source:HGNC Symbol;Acc:HGNC:3647]	270	295	126	163	92	97	97	133	123	106	76	94	86	90
ENSMUSG00000006389	17480	Mpl	myeloproliferative leukemia virus oncogene [Source:MGI Symbol;Acc:MGI:97076]	7	16	7	8	10	9	24	19	11	ENSG00000066933	4649	MYO9A	myosin IXA [Source:HGNC Symbol;Acc:HGNC:7608]	657	803	565	823	585	688	720	986	710	761	571	565	672	739
ENSMUSG00000006390	54325	Elovl1	elongation of very long chain fatty acids (FEN1/Elo2, SUR4/Elo3, yeast)-like 1 [Source:MGI Symbol;Acc:MGI:1858959]	82	78	141	85	109	133	104	106	146	ENSG00000067048	8653	DDX3Y	DEAD-box helicase 3 Y-linked [Source:HGNC Symbol;Acc:HGNC:2699]	0	0	437	715	0	0	479	663	408	408	402	420	507	591
ENSMUSG00000006392	80509	Med8	mediator complex subunit 8 [Source:MGI Symbol;Acc:MGI:1915269]	569	499	658	572	637	744	455	633	757	ENSG00000067057	5214	PFKP	phosphofructokinase, platelet [Source:HGNC Symbol;Acc:HGNC:8878]	108	148	645	1032	161	180	139	169	188	169	141	154	202	225
ENSMUSG00000006395	.	Hyi	hydroxypyruvate isomerase (putative) [Source:MGI Symbol;Acc:MGI:1915430]	32	29	28	38	32	30	70	73	35	ENSG00000067064	3422	IDI1	isopentenyl-diphosphate delta isomerase 1 [Source:HGNC Symbol;Acc:HGNC:5387]	717	870	526	857	1033	1150	931	1214	758	718	522	601	377	389
ENSMUSG00000006398	107995	Cdc20	cell division cycle 20 [Source:MGI Symbol;Acc:MGI:1859866]	1413	1232	2071	1328	1562	1980	1312	1686	2282	ENSG00000067066	6672	SP100	SP100 nuclear antigen [Source:HGNC Symbol;Acc:HGNC:11206]	3	7	281	477	2	1	8	6	18	11	8	11	1	4
ENSMUSG00000006403	240913	Adamts4	a disintegrin-like and metallopeptidase (reprolysin type) with thrombospondin type 1 motif, 4 [Source:MGI Symbol;Acc:MGI:1339949]	152	113	147	123	119	157	151	135	185	ENSG00000067082	1316	KLF6	Kruppel like factor 6 [Source:HGNC Symbol;Acc:HGNC:2235]	692	753	616	957	405	464	577	836	640	631	393	439	318	377
ENSMUSG00000006411	71740	Nectin4	nectin cell adhesion molecule 4 [Source:MGI Symbol;Acc:MGI:1918990]	12	12	20	25	18	34	42	17	19	ENSG00000067113	8611	PLPP1	phospholipid phosphatase 1 [Source:HGNC Symbol;Acc:HGNC:9228]	59	68	184	247	40	36	67	83	42	60	30	36	44	67
ENSMUSG00000006412	18637	Pfdn2	prefoldin 2 [Source:MGI Symbol;Acc:MGI:1276111]	395	352	610	426	364	595	464	453	598	ENSG00000067141	4756	NEO1	neogenin 1 [Source:HGNC Symbol;Acc:HGNC:7754]	699	856	279	503	1724	1745	1341	1783	1892	1818	1547	1786	1270	1523
ENSMUSG00000006418	81018	Rnf114	ring finger protein 114 [Source:MGI Symbol;Acc:MGI:1933159]	944	763	1026	730	899	1130	1034	1033	1217	ENSG00000067167	23471	TRAM1	translocation associated membrane protein 1 [Source:HGNC Symbol;Acc:HGNC:20568]	743	841	1677	2443	714	838	762	1226	883	796	581	631	534	603
ENSMUSG00000006423	77644	C330007P06Rik	RIKEN cDNA C330007P06 gene [Source:MGI Symbol;Acc:MGI:1924894]	420	399	524	429	387	468	427	456	550	ENSG00000067177	5255	PHKA1	phosphorylase kinase regulatory subunit alpha 1 [Source:HGNC Symbol;Acc:HGNC:8925]	16	15	15	29	95	111	66	97	43	41	52	62	95	121
ENSMUSG00000006435	18011	Neurl1a	neuralized E3 ubiquitin protein ligase 1A [Source:MGI Symbol;Acc:MGI:1334263]	84	87	82	56	75	78	106	70	82	ENSG00000067182	7132	TNFRSF1A	TNF receptor superfamily member 1A [Source:HGNC Symbol;Acc:HGNC:11916]	354	414	594	856	318	314	329	456	295	253	209	241	137	174
ENSMUSG00000006442	20810	Srm	spermidine synthase [Source:MGI Symbol;Acc:MGI:102690]	1171	1049	1748	1447	1604	1511	1259	1757	1977	ENSG00000067191	782	CACNB1	calcium voltage-gated channel auxiliary subunit beta 1 [Source:HGNC Symbol;Acc:HGNC:1401]	76	92	66	117	78	87	166	239	131	108	83	87	84	110
ENSMUSG00000006445	13836	Epha2	Eph receptor A2 [Source:MGI Symbol;Acc:MGI:95278]	142	133	199	142	162	205	226	156	174	ENSG00000067208	7813	EVI5	ecotropic viral integration site 5 [Source:HGNC Symbol;Acc:HGNC:3501]	250	269	325	396	330	332	253	343	347	285	201	260	355	387
ENSMUSG00000006456	56275	Rbm14	RNA binding motif protein 14 [Source:MGI Symbol;Acc:MGI:1929092]	2159	1788	2572	2031	2262	2564	2083	2564	2897	ENSG00000067221	9399	STOML1	stomatin like 1 [Source:HGNC Symbol;Acc:HGNC:14560]	17	45	23	52	34	33	32	36	31	28	18	15	11	17
ENSMUSG00000006457	11474	Actn3	actinin alpha 3 [Source:MGI Symbol;Acc:MGI:99678]	36	19	31	44	35	47	52	45	59	ENSG00000067225	5315	PKM	pyruvate kinase M1/2 [Source:HGNC Symbol;Acc:HGNC:9021]	3345	3991	3913	6042	4764	5331	4736	6628	3382	3385	2647	3035	1669	1803
ENSMUSG00000006462	.	A530013C23Rik	RIKEN cDNA A530013C23 gene [Source:MGI Symbol;Acc:MGI:3041178]	1	5	4	2	1	0	0	6	1	ENSG00000067248	54505	DHX29	DExH-box helicase 29 [Source:HGNC Symbol;Acc:HGNC:15815]	211	225	237	324	229	252	264	353	213	233	162	203	175	189
ENSMUSG00000006463	70605	Zdhhc24	zinc finger, DHHC domain containing 24 [Source:MGI Symbol;Acc:MGI:1917855]	38	46	62	54	41	67	69	69	57	ENSG00000067334	30836	DNTTIP2	deoxynucleotidyltransferase terminal interacting protein 2 [Source:HGNC Symbol;Acc:HGNC:24013]	293	276	154	241	258	302	264	314	280	271	190	240	293	334
ENSMUSG00000006464	52028	Bbs1	Bardet-Biedl syndrome 1 (human) [Source:MGI Symbol;Acc:MGI:1277215]	240	226	289	223	239	283	271	256	284	ENSG00000067365	79091	METTL22	methyltransferase like 22 [Source:HGNC Symbol;Acc:HGNC:28368]	99	107	123	212	161	168	138	194	144	149	154	131	171	223
ENSMUSG00000006469	142681	Slc34a3	solute carrier family 34 (sodium phosphate), member 3 [Source:MGI Symbol;Acc:MGI:2159410]	0	0	1	0	0	0	0	0	0	ENSG00000067369	7158	TP53BP1	tumor protein p53 binding protein 1 [Source:HGNC Symbol;Acc:HGNC:11999]	1373	1636	903	1435	1577	1632	1634	2009	1837	1725	1220	1463	1358	1658
ENSMUSG00000006471	78797	Ndor1	NADPH dependent diflavin oxidoreductase 1 [Source:MGI Symbol;Acc:MGI:1926047]	319	273	394	369	361	434	303	343	454	ENSG00000067445	7216	TRO	trophinin [Source:HGNC Symbol;Acc:HGNC:12326]	463	519	595	980	489	562	624	900	683	624	515	576	609	668
ENSMUSG00000006476	56876	Nsmf	NMDA receptor synaptonuclear signaling and neuronal migration factor [Source:MGI Symbol;Acc:MGI:1861755]	330	260	338	215	266	327	285	345	346	ENSG00000067533	51018	RRP15	ribosomal RNA processing 15 homolog [Source:HGNC Symbol;Acc:HGNC:24255]	123	159	87	120	242	273	217	331	165	120	111	116	176	170
ENSMUSG00000006488	19113	Prl7a1	prolactin family 7, subfamily a, member 1 [Source:MGI Symbol;Acc:MGI:1206572]	0	0	4	0	0	1	0	2	0	ENSG00000067560	387	RHOA	ras homolog family member A [Source:HGNC Symbol;Acc:HGNC:667]	1622	1896	2065	3263	1630	1944	1938	2820	1677	1675	1179	1342	1187	1385
ENSMUSG00000006490	67310	Prl8a9	prolactin family8, subfamily a, member 9 [Source:MGI Symbol;Acc:MGI:1914560]	0	0	0	0	0	0	0	0	0	ENSG00000067596	1659	DHX8	DEAH-box helicase 8 [Source:HGNC Symbol;Acc:HGNC:2749]	338	370	283	364	326	422	387	502	328	310	249	266	268	300
ENSMUSG00000006494	228026	Pdk1	pyruvate dehydrogenase kinase, isoenzyme 1 [Source:MGI Symbol;Acc:MGI:1926119]	1234	966	1375	789	1047	1336	4493	3183	2923	ENSG00000067601	.	PMS2P4	PMS1 homolog 2, mismatch repair system component pseudogene 4 [Source:HGNC Symbol;Acc:HGNC:9129]	18	26	8	12	21	17	15	20	8	12	10	19	7	17
ENSMUSG00000006498	19205	Ptbp1	polypyrimidine tract binding protein 1 [Source:MGI Symbol;Acc:MGI:97791]	9500	7950	12239	9490	10681	12717	9793	11854	13359	ENSG00000067606	5590	PRKCZ	protein kinase C zeta [Source:HGNC Symbol;Acc:HGNC:9412]	20	28	2	0	25	46	26	50	44	50	31	45	95	108
ENSMUSG00000006517	192156	Mvd	mevalonate (diphospho) decarboxylase [Source:MGI Symbol;Acc:MGI:2179327]	451	346	524	342	432	669	481	523	541	ENSG00000067646	7544	ZFY	zinc finger protein Y-linked [Source:HGNC Symbol;Acc:HGNC:12870]	0	0	97	125	0	0	102	151	107	129	108	119	79	83
ENSMUSG00000006519	13057	Cyba	cytochrome b-245, alpha polypeptide [Source:MGI Symbol;Acc:MGI:1316658]	54	56	108	73	76	76	63	78	85	ENSG00000067704	55699	IARS2	isoleucyl-tRNA synthetase 2, mitochondrial [Source:HGNC Symbol;Acc:HGNC:29685]	404	513	289	486	450	514	475	625	332	369	318	361	464	529
ENSMUSG00000006522	16426	Itih3	inter-alpha trypsin inhibitor, heavy chain 3 [Source:MGI Symbol;Acc:MGI:96620]	0	0	0	0	1	0	0	0	0	ENSG00000067715	6857	SYT1	synaptotagmin 1 [Source:HGNC Symbol;Acc:HGNC:11509]	376	468	36	76	691	849	414	525	459	429	436	490	212	220
ENSMUSG00000006526	69179	Stimate	STIM activating enhancer [Source:MGI Symbol;Acc:MGI:1921500]	132	130	219	134	150	202	126	161	172	ENSG00000067798	89795	NAV3	neuron navigator 3 [Source:HGNC Symbol;Acc:HGNC:15998]	77	102	420	705	73	69	1082	1367	328	319	132	168	76	111
ENSMUSG00000006527	54650	Sfmbt1	Scm-like with four mbt domains 1 [Source:MGI Symbol;Acc:MGI:1859609]	657	625	841	629	623	878	527	742	886	ENSG00000067829	3421	IDH3G	isocitrate dehydrogenase (NAD(+)) 3 gamma [Source:HGNC Symbol;Acc:HGNC:5386]	176	198	135	237	170	183	161	211	173	130	114	113	111	129
ENSMUSG00000006529	16424	Itih1	inter-alpha trypsin inhibitor, heavy chain 1 [Source:MGI Symbol;Acc:MGI:96618]	0	0	0	0	0	0	0	0	0	ENSG00000067836	79641	ROGDI	rogdi atypical leucine zipper [Source:HGNC Symbol;Acc:HGNC:29478]	85	124	55	85	68	76	83	112	91	94	64	78	65	81
ENSMUSG00000006538	16147	Ihh	Indian hedgehog [Source:MGI Symbol;Acc:MGI:96533]	0	3	5	1	4	0	0	4	4	ENSG00000067840	57595	PDZD4	PDZ domain containing 4 [Source:HGNC Symbol;Acc:HGNC:21167]	132	190	15	31	357	359	216	286	238	241	180	239	160	190
ENSMUSG00000006542	241113	Prkag3	protein kinase, AMP-activated, gamma 3 non-catalytic subunit [Source:MGI Symbol;Acc:MGI:1891343]	5	11	1	0	8	2	0	5	2	ENSG00000067842	492	ATP2B3	ATPase plasma membrane Ca2+ transporting 3 [Source:HGNC Symbol;Acc:HGNC:816]	4	3	2	4	1	1	2	2	6	10	2	6	3	1
ENSMUSG00000006546	12958	Cryba2	crystallin, beta A2 [Source:MGI Symbol;Acc:MGI:104336]	0	0	0	0	0	0	1	0	0	ENSG00000067900	6093	ROCK1	Rho associated coiled-coil containing protein kinase 1 [Source:HGNC Symbol;Acc:HGNC:10251]	464	557	476	616	462	539	554	716	561	560	337	441	473	551
ENSMUSG00000006567	11979	Atp7b	ATPase, Cu++ transporting, beta polypeptide [Source:MGI Symbol;Acc:MGI:103297]	121	101	132	84	90	134	319	213	215	ENSG00000067955	865	CBFB	core-binding factor subunit beta [Source:HGNC Symbol;Acc:HGNC:1539]	278	304	312	508	296	347	363	495	270	267	201	243	241	263
ENSMUSG00000006570	13215	Defb2	defensin beta 2 [Source:MGI Symbol;Acc:MGI:1338754]	0	0	0	0	0	0	0	0	0	ENSG00000067992	5165	PDK3	pyruvate dehydrogenase kinase 3 [Source:HGNC Symbol;Acc:HGNC:8811]	247	315	39	68	1022	1011	364	499	338	332	322	367	362	412
ENSMUSG00000006574	20533	Slc4a1	solute carrier family 4 (anion exchanger), member 1 [Source:MGI Symbol;Acc:MGI:109393]	818	765	770	515	655	927	251	462	477	ENSG00000068001	8692	HYAL2	hyaluronidase 2 [Source:HGNC Symbol;Acc:HGNC:5321]	371	469	229	368	429	434	342	579	363	391	315	367	282	315
ENSMUSG00000006575	51799	Rundc3a	RUN domain containing 3A [Source:MGI Symbol;Acc:MGI:1858752]	34	41	57	23	39	52	34	42	24	ENSG00000068024	9759	HDAC4	histone deacetylase 4 [Source:HGNC Symbol;Acc:HGNC:14063]	203	273	168	277	370	349	349	439	237	244	210	235	207	252
ENSMUSG00000006576	20536	Slc4a3	solute carrier family 4 (anion exchanger), member 3 [Source:MGI Symbol;Acc:MGI:109350]	302	230	277	228	234	301	258	280	280	ENSG00000068028	11186	RASSF1	Ras association domain family member 1 [Source:HGNC Symbol;Acc:HGNC:9882]	39	57	53	89	61	35	49	59	63	54	37	40	52	70
ENSMUSG00000006585	67177	Cdt1	chromatin licensing and DNA replication factor 1 [Source:MGI Symbol;Acc:MGI:1914427]	1060	888	1338	938	1077	1228	1336	1360	1540	ENSG00000068078	2261	FGFR3	fibroblast growth factor receptor 3 [Source:HGNC Symbol;Acc:HGNC:3690]	45	56	5	16	189	157	83	117	300	314	279	319	685	823
ENSMUSG00000006586	12395	Runx1t1	RUNX1 translocation partner 1 [Source:MGI Symbol;Acc:MGI:104793]	353	339	323	188	251	424	319	380	402	ENSG00000068079	3430	IFI35	interferon induced protein 35 [Source:HGNC Symbol;Acc:HGNC:5399]	11	10	22	37	2	0	6	7	1	4	5	4	2	6
ENSMUSG00000006587	30927	Snai3	snail family zinc finger 3 [Source:MGI Symbol;Acc:MGI:1353563]	1	2	5	9	3	7	4	8	1	ENSG00000068097	63897	HEATR6	HEAT repeat containing 6 [Source:HGNC Symbol;Acc:HGNC:24076]	251	296	151	209	280	294	204	342	242	237	236	259	251	280
ENSMUSG00000006589	11821	Aprt	adenine phosphoribosyl transferase [Source:MGI Symbol;Acc:MGI:88061]	580	473	850	608	668	825	784	829	917	ENSG00000068120	80347	COASY	Coenzyme A synthase [Source:HGNC Symbol;Acc:HGNC:29932]	119	161	126	222	101	111	165	205	159	148	142	133	147	177
ENSMUSG00000006599	14884	Gtf2h1	general transcription factor II H, polypeptide 1 [Source:MGI Symbol;Acc:MGI:1277216]	461	352	672	453	517	659	555	577	638	ENSG00000068137	79990	PLEKHH3	pleckstrin homology, MyTH4 and FERM domain containing H3 [Source:HGNC Symbol;Acc:HGNC:26105]	64	73	99	119	52	65	74	85	59	82	54	51	46	68
ENSMUSG00000006611	15216	Hfe	homeostatic iron regulator [Source:MGI Symbol;Acc:MGI:109191]	2	6	8	4	7	17	3	7	1	ENSG00000068305	4205	MEF2A	myocyte enhancer factor 2A [Source:HGNC Symbol;Acc:HGNC:6993]	282	294	448	757	264	339	338	498	361	352	306	296	254	304
ENSMUSG00000006638	57742	Abhd1	abhydrolase domain containing 1 [Source:MGI Symbol;Acc:MGI:1931013]	3	2	2	3	2	0	9	8	2	ENSG00000068308	55593	OTUD5	OTU deubiquitinase 5 [Source:HGNC Symbol;Acc:HGNC:25402]	309	386	227	344	194	232	227	285	217	204	160	182	209	249
ENSMUSG00000006641	330064	Slc5a6	solute carrier family 5 (sodium-dependent vitamin transporter), member 6 [Source:MGI Symbol;Acc:MGI:2660847]	125	121	155	105	146	120	172	123	165	ENSG00000068323	7030	TFE3	transcription factor binding to IGHM enhancer 3 [Source:HGNC Symbol;Acc:HGNC:11752]	654	819	310	554	257	271	256	363	277	245	166	196	223	226
ENSMUSG00000006642	69852	Tcf23	transcription factor 23 [Source:MGI Symbol;Acc:MGI:1934960]	0	4	0	0	0	0	3	9	0	ENSG00000068354	4943	TBC1D25	TBC1 domain family member 25 [Source:HGNC Symbol;Acc:HGNC:8092]	50	64	79	165	58	61	69	73	62	83	67	62	85	101
ENSMUSG00000006649	54631	Nphs1	nephrosis 1, nephrin [Source:MGI Symbol;Acc:MGI:1859637]	93	91	123	121	87	128	86	94	124	ENSG00000068366	2182	ACSL4	acyl-CoA synthetase long chain family member 4 [Source:HGNC Symbol;Acc:HGNC:3571]	418	487	405	690	390	456	299	441	297	316	224	228	267	296
ENSMUSG00000006651	11803	Aplp1	amyloid beta (A4) precursor-like protein 1 [Source:MGI Symbol;Acc:MGI:88046]	87	119	123	51	88	86	160	88	124	ENSG00000068383	3632	INPP5A	inositol polyphosphate-5-phosphatase A [Source:HGNC Symbol;Acc:HGNC:6076]	146	192	240	441	234	233	167	236	177	179	144	155	107	139
ENSMUSG00000006673	69232	Qrich1	glutamine-rich 1 [Source:MGI Symbol;Acc:MGI:1916482]	2314	1996	2811	2078	2356	2620	2193	2647	2825	ENSG00000068394	27238	GPKOW	G-patch domain and KOW motifs [Source:HGNC Symbol;Acc:HGNC:30677]	30	27	27	32	37	34	40	34	32	25	29	23	28	45
ENSMUSG00000006675	74443	P4htm	prolyl 4-hydroxylase, transmembrane (endoplasmic reticulum) [Source:MGI Symbol;Acc:MGI:1921693]	56	46	39	49	41	57	104	70	67	ENSG00000068400	56850	GRIPAP1	GRIP1 associated protein 1 [Source:HGNC Symbol;Acc:HGNC:18706]	151	209	60	111	128	143	93	138	159	146	121	138	143	146
ENSMUSG00000006676	71472	Usp19	ubiquitin specific peptidase 19 [Source:MGI Symbol;Acc:MGI:1918722]	1772	1428	2032	1565	1719	2096	1670	1847	2169	ENSG00000068438	24140	FTSJ1	FtsJ RNA 2'-O-methyltransferase 1 [Source:HGNC Symbol;Acc:HGNC:13254]	123	150	178	292	105	140	221	243	133	112	113	86	98	92
ENSMUSG00000006678	18968	Pola1	polymerase (DNA directed), alpha 1 [Source:MGI Symbol;Acc:MGI:99660]	1492	1200	1615	1326	1481	1624	1730	1799	1913	ENSG00000068489	55771	PRR11	proline rich 11 [Source:HGNC Symbol;Acc:HGNC:25619]	373	431	165	246	390	397	282	391	422	412	313	377	332	369
ENSMUSG00000006699	12540	Cdc42	cell division cycle 42 [Source:MGI Symbol;Acc:MGI:106211]	2347	2106	2966	2214	2707	2861	2909	3107	3445	ENSG00000068615	65055	REEP1	receptor accessory protein 1 [Source:HGNC Symbol;Acc:HGNC:25786]	22	25	4	9	38	48	100	120	114	112	57	47	40	48
ENSMUSG00000006705	18771	Pknox1	Pbx/knotted 1 homeobox [Source:MGI Symbol;Acc:MGI:1201409]	205	200	251	225	238	312	182	199	267	ENSG00000068650	23250	ATP11A	ATPase phospholipid transporting 11A [Source:HGNC Symbol;Acc:HGNC:13552]	452	545	199	308	614	641	481	735	459	443	414	500	651	731
ENSMUSG00000006711	210108	D130043K22Rik	RIKEN cDNA D130043K22 gene [Source:MGI Symbol;Acc:MGI:3036268]	8	4	9	8	5	16	5	10	4	ENSG00000068654	25885	POLR1A	RNA polymerase I subunit A [Source:HGNC Symbol;Acc:HGNC:17264]	884	1077	685	1074	1098	1171	673	954	694	784	695	865	567	655
ENSMUSG00000006715	57441	Gmnn	geminin [Source:MGI Symbol;Acc:MGI:1927344]	406	335	471	400	443	570	330	454	518	ENSG00000068697	9741	LAPTM4A	lysosomal protein transmembrane 4 alpha [Source:HGNC Symbol;Acc:HGNC:6924]	292	337	733	1194	147	158	422	551	388	431	192	221	278	249
ENSMUSG00000006717	66834	Acot13	acyl-CoA thioesterase 13 [Source:MGI Symbol;Acc:MGI:1914084]	58	68	106	63	83	95	107	76	92	ENSG00000068724	57217	TTC7A	tetratricopeptide repeat domain 7A [Source:HGNC Symbol;Acc:HGNC:19750]	49	76	92	160	107	92	88	129	86	71	75	88	80	89
ENSMUSG00000006720	193452	Zfp184	zinc finger protein 184 (Kruppel-like) [Source:MGI Symbol;Acc:MGI:1922244]	302	263	367	296	301	390	341	294	342	ENSG00000068745	51447	IP6K2	inositol hexakisphosphate kinase 2 [Source:HGNC Symbol;Acc:HGNC:17313]	224	297	177	246	338	365	349	494	410	378	353	452	407	493
ENSMUSG00000006724	13115	Cyp27b1	cytochrome P450, family 27, subfamily b, polypeptide 1 [Source:MGI Symbol;Acc:MGI:1098274]	4	4	6	1	6	8	7	2	0	ENSG00000068781	286749	STON1-GTF2A1L	STON1-GTF2A1L readthrough [Source:HGNC Symbol;Acc:HGNC:30651]	31	19	17	19	5	0	48	44	45	86	152	97	62	77
ENSMUSG00000006728	12567	Cdk4	cyclin-dependent kinase 4 [Source:MGI Symbol;Acc:MGI:88357]	6003	5207	8207	5629	6141	8092	6111	6975	8313	ENSG00000068784	55133	SRBD1	S1 RNA binding domain 1 [Source:HGNC Symbol;Acc:HGNC:25521]	175	224	129	164	224	235	171	245	173	165	148	167	119	143
ENSMUSG00000006731	14421	B4galnt1	beta-1,4-N-acetyl-galactosaminyl transferase 1 [Source:MGI Symbol;Acc:MGI:1342057]	56	59	96	58	51	92	148	104	112	ENSG00000068796	3796	KIF2A	kinesin family member 2A [Source:HGNC Symbol;Acc:HGNC:6318]	391	481	214	351	514	590	552	668	466	476	391	458	419	470
ENSMUSG00000006732	17299	Mettl1	methyltransferase like 1 [Source:MGI Symbol;Acc:MGI:1339986]	208	202	312	242	214	295	204	253	235	ENSG00000068831	10235	RASGRP2	RAS guanyl releasing protein 2 [Source:HGNC Symbol;Acc:HGNC:9879]	6	5	15	19	9	9	4	6	19	13	14	11	12	17
ENSMUSG00000006736	67125	Tspan31	tetraspanin 31 [Source:MGI Symbol;Acc:MGI:1914375]	551	450	644	464	495	601	574	558	633	ENSG00000068878	23198	PSME4	proteasome activator subunit 4 [Source:HGNC Symbol;Acc:HGNC:20635]	948	1058	589	868	1286	1455	1063	1432	1183	1225	921	1109	790	975
ENSMUSG00000006740	16573	Kif5b	kinesin family member 5B [Source:MGI Symbol;Acc:MGI:1098268]	2609	2331	3361	2539	2896	3340	2609	3015	3473	ENSG00000068885	57560	IFT80	intraflagellar transport 80 [Source:HGNC Symbol;Acc:HGNC:29262]	213	256	182	256	241	265	239	301	260	207	212	242	251	358
ENSMUSG00000006763	78935	Saal1	serum amyloid A-like 1 [Source:MGI Symbol;Acc:MGI:1926185]	414	397	515	410	476	530	562	632	610	ENSG00000068903	22933	SIRT2	sirtuin 2 [Source:HGNC Symbol;Acc:HGNC:10886]	174	218	175	277	161	171	204	323	135	149	124	127	109	94
ENSMUSG00000006764	216343	Tph2	tryptophan hydroxylase 2 [Source:MGI Symbol;Acc:MGI:2651811]	0	0	1	0	0	1	0	0	0	ENSG00000068912	27248	ERLEC1	endoplasmic reticulum lectin 1 [Source:HGNC Symbol;Acc:HGNC:25222]	193	235	371	624	185	189	198	225	256	229	148	178	166	168
ENSMUSG00000006777	94179	Krt23	keratin 23 [Source:MGI Symbol;Acc:MGI:2148866]	0	1	1	1	4	4	0	1	2	ENSG00000068971	5526	PPP2R5B	protein phosphatase 2 regulatory subunit B'beta [Source:HGNC Symbol;Acc:HGNC:9310]	72	89	132	217	81	62	89	113	128	120	64	78	70	77
ENSMUSG00000006782	12799	Cnp	2',3'-cyclic nucleotide 3' phosphodiesterase [Source:MGI Symbol;Acc:MGI:88437]	79	68	102	64	88	123	96	98	97	ENSG00000068976	5837	PYGM	glycogen phosphorylase, muscle associated [Source:HGNC Symbol;Acc:HGNC:9726]	15	4	36	60	6	2	18	34	7	11	12	6	36	33
ENSMUSG00000006784	74407	Ttc25	tetratricopeptide repeat domain 25 [Source:MGI Symbol;Acc:MGI:1921657]	19	6	13	15	11	15	34	27	14	ENSG00000068985	8712	PAGE1	PAGE family member 1 [Source:HGNC Symbol;Acc:HGNC:4107]	0	0	0	0	0	0	0	0	0	0	0	0	0	0
ENSMUSG00000006800	72043	Sulf2	sulfatase 2 [Source:MGI Symbol;Acc:MGI:1919293]	3704	3312	4703	3598	4144	5267	4463	4723	5260	ENSG00000069011	5307	PITX1	paired like homeodomain 1 [Source:HGNC Symbol;Acc:HGNC:9004]	1	1	0	3	6	0	0	2	4	1	2	1	2	0
ENSMUSG00000006818	20656	Sod2	superoxide dismutase 2, mitochondrial [Source:MGI Symbol;Acc:MGI:98352]	801	737	1065	759	964	1147	818	1016	1209	ENSG00000069018	57113	TRPC7	transient receptor potential cation channel subfamily C member 7 [Source:HGNC Symbol;Acc:HGNC:20754]	0	0	0	1	0	0	7	2	0	1	0	0	0	0
ENSMUSG00000006850	71983	Tmco6	transmembrane and coiled-coil domains 6 [Source:MGI Symbol;Acc:MGI:1919233]	106	80	145	88	94	155	171	158	173	ENSG00000069020	375449	MAST4	microtubule associated serine/threonine kinase family member 4 [Source:HGNC Symbol;Acc:HGNC:19037]	151	181	277	473	179	183	169	264	245	197	209	202	107	118
ENSMUSG00000006906	70527	Stambp	STAM binding protein [Source:MGI Symbol;Acc:MGI:1917777]	118	97	124	110	124	80	185	173	201	ENSG00000069122	221395	ADGRF5	adhesion G protein-coupled receptor F5 [Source:HGNC Symbol;Acc:HGNC:19030]	22	22	1217	1788	0	0	6	9	32	40	14	13	4	0
ENSMUSG00000006920	14055	Ezh1	enhancer of zeste 1 polycomb repressive complex 2 subunit [Source:MGI Symbol;Acc:MGI:1097695]	149	155	198	145	138	177	345	244	271	ENSG00000069188	54549	SDK2	sidekick cell adhesion molecule 2 [Source:HGNC Symbol;Acc:HGNC:19308]	1629	1964	381	593	2218	2147	2285	3205	2272	2338	1959	2208	2382	2663
ENSMUSG00000006930	15114	Hap1	huntingtin-associated protein 1 [Source:MGI Symbol;Acc:MGI:1261831]	336	266	363	275	324	378	239	298	199	ENSG00000069206	8756	ADAM7	ADAM metallopeptidase domain 7 [Source:HGNC Symbol;Acc:HGNC:214]	2	0	1	0	0	1	5	4	5	1	0	2	0	1
ENSMUSG00000006931	66180	P3h4	prolyl 3-hydroxylase family member 4 (non-enzymatic) [Source:MGI Symbol;Acc:MGI:1913430]	102	85	117	80	99	101	193	171	172	ENSG00000069248	55746	NUP133	nucleoporin 133 [Source:HGNC Symbol;Acc:HGNC:18016]	418	486	267	342	519	535	453	641	420	438	364	459	609	665
ENSMUSG00000006932	12387	Ctnnb1	catenin (cadherin associated protein), beta 1 [Source:MGI Symbol;Acc:MGI:88276]	10988	9350	13867	9742	11021	13804	11434	12417	13619	ENSG00000069275	64710	NUCKS1	nuclear casein kinase and cyclin dependent kinase substrate 1 [Source:HGNC Symbol;Acc:HGNC:29923]	5380	6223	2765	4161	5122	5697	6018	7890	4976	5084	3889	4610	5264	5968
ENSMUSG00000006941	68969	Eif1b	eukaryotic translation initiation factor 1B [Source:MGI Symbol;Acc:MGI:1916219]	711	659	938	657	748	981	658	758	878	ENSG00000069329	55737	VPS35	VPS35 retromer complex component [Source:HGNC Symbol;Acc:HGNC:13487]	767	915	442	648	719	801	766	921	813	728	578	685	444	510
ENSMUSG00000006948	56640	Klk4	kallikrein related-peptidase 4 (prostase, enamel matrix, prostate) [Source:MGI Symbol;Acc:MGI:1861379]	0	0	0	0	1	0	0	0	0	ENSG00000069345	10294	DNAJA2	DnaJ heat shock protein family (Hsp40) member A2 [Source:HGNC Symbol;Acc:HGNC:14884]	243	298	188	335	352	383	336	441	289	253	260	267	253	311
ENSMUSG00000006958	12667	Chrd	chordin [Source:MGI Symbol;Acc:MGI:1313268]	23	12	17	16	12	35	22	19	19	ENSG00000069399	602	BCL3	BCL3 transcription coactivator [Source:HGNC Symbol;Acc:HGNC:998]	72	64	185	379	46	90	64	70	36	49	49	39	27	20
ENSMUSG00000006998	21762	Psmd2	proteasome (prosome, macropain) 26S subunit, non-ATPase, 2 [Source:MGI Symbol;Acc:MGI:1096584]	4069	3492	5392	3783	4289	5293	4190	4652	5644	ENSG00000069424	8514	KCNAB2	potassium voltage-gated channel subfamily A regulatory beta subunit 2 [Source:HGNC Symbol;Acc:HGNC:6229]	18	27	27	28	31	20	36	32	41	59	34	27	52	67
ENSMUSG00000007021	20974	Syngr3	synaptogyrin 3 [Source:MGI Symbol;Acc:MGI:1341881]	28	32	24	23	14	17	26	25	30	ENSG00000069431	10060	ABCC9	ATP binding cassette subfamily C member 9 [Source:HGNC Symbol;Acc:HGNC:60]	26	27	4	5	361	397	241	311	230	242	268	313	94	98
ENSMUSG00000007029	22321	Vars	valyl-tRNA synthetase [Source:MGI Symbol;Acc:MGI:90675]	4697	3882	6258	4558	5060	6163	5528	6199	6811	ENSG00000069482	51083	GAL	galanin and GMAP prepropeptide [Source:HGNC Symbol;Acc:HGNC:4114]	12	13	1	2	6	6	22	31	6	7	2	2	9	6
ENSMUSG00000007030	27762	Vwa7	von Willebrand factor A domain containing 7 [Source:MGI Symbol;Acc:MGI:1306798]	16	10	16	11	20	30	28	30	19	ENSG00000069493	29121	CLEC2D	C-type lectin domain family 2 member D [Source:HGNC Symbol;Acc:HGNC:14351]	48	58	13	19	81	69	97	83	84	71	112	149	88	87
ENSMUSG00000007033	15482	Hspa1l	heat shock protein 1-like [Source:MGI Symbol;Acc:MGI:96231]	71	45	68	67	56	73	73	75	77	ENSG00000069509	139341	FUNDC1	FUN14 domain containing 1 [Source:HGNC Symbol;Acc:HGNC:28746]	29	26	10	14	26	18	19	26	19	21	18	23	17	19
ENSMUSG00000007034	70129	Slc44a4	solute carrier family 44, member 4 [Source:MGI Symbol;Acc:MGI:1917379]	4	2	5	1	1	1	4	2	0	ENSG00000069535	4129	MAOB	monoamine oxidase B [Source:HGNC Symbol;Acc:HGNC:6834]	0	1	2	3	0	0	0	3	4	2	3	0	4	7
ENSMUSG00000007035	17687	Msh5	mutS homolog 5 [Source:MGI Symbol;Acc:MGI:1329021]	35	36	32	31	29	39	74	57	27	ENSG00000069667	6095	RORA	RAR related orphan receptor A [Source:HGNC Symbol;Acc:HGNC:10258]	64	82	235	302	81	95	179	223	152	169	96	134	212	250
ENSMUSG00000007036	193742	Abhd16a	abhydrolase domain containing 16A [Source:MGI Symbol;Acc:MGI:99476]	115	144	199	128	152	203	201	164	208	ENSG00000069696	1815	DRD4	dopamine receptor D4 [Source:HGNC Symbol;Acc:HGNC:3025]	3	6	3	7	16	7	5	10	26	21	33	16	32	37
ENSMUSG00000007038	18010	Neu1	neuraminidase 1 [Source:MGI Symbol;Acc:MGI:97305]	94	89	147	122	91	140	230	165	166	ENSG00000069702	7049	TGFBR3	transforming growth factor beta receptor 3 [Source:HGNC Symbol;Acc:HGNC:11774]	203	263	142	196	69	84	92	125	107	111	88	112	430	549
ENSMUSG00000007039	51793	Ddah2	dimethylarginine dimethylaminohydrolase 2 [Source:MGI Symbol;Acc:MGI:1859016]	472	418	589	341	401	609	583	637	705	ENSG00000069764	8399	PLA2G10	phospholipase A2 group X [Source:HGNC Symbol;Acc:HGNC:9029]	0	0	0	0	1	0	0	0	2	1	0	1	0	0
ENSMUSG00000007041	114584	Clic1	chloride intracellular channel 1 [Source:MGI Symbol;Acc:MGI:2148924]	407	330	592	405	408	580	595	605	698	ENSG00000069812	54626	HES2	hes family bHLH transcription factor 2 [Source:HGNC Symbol;Acc:HGNC:16005]	1	1	1	0	4	3	9	7	12	8	4	2	2	0
ENSMUSG00000007050	27756	Lsm2	LSM2 homolog, U6 small nuclear RNA and mRNA degradation associated [Source:MGI Symbol;Acc:MGI:90676]	456	374	649	478	454	653	449	508	622	ENSG00000069849	483	ATP1B3	ATPase Na+/K+ transporting subunit beta 3 [Source:HGNC Symbol;Acc:HGNC:806]	330	370	217	349	317	332	357	492	323	320	226	257	275	326
ENSMUSG00000007080	18973	Pole	polymerase (DNA directed), epsilon [Source:MGI Symbol;Acc:MGI:1196391]	2301	1999	2457	2086	2154	2704	2885	2831	3144	ENSG00000069869	4734	NEDD4	NEDD4 E3 ubiquitin protein ligase [Source:HGNC Symbol;Acc:HGNC:7727]	268	329	378	623	330	368	161	226	224	182	207	237	97	113
ENSMUSG00000007097	98660	Atp1a2	ATPase, Na+/K+ transporting, alpha 2 polypeptide [Source:MGI Symbol;Acc:MGI:88106]	12	6	29	7	16	13	33	21	9	ENSG00000069943	9488	PIGB	phosphatidylinositol glycan anchor biosynthesis class B [Source:HGNC Symbol;Acc:HGNC:8959]	38	52	39	46	44	56	35	43	22	38	30	41	49	30
ENSMUSG00000007107	27222	Atp1a4	ATPase, Na+/K+ transporting, alpha 4 polypeptide [Source:MGI Symbol;Acc:MGI:1351335]	0	2	0	0	0	0	0	0	0	ENSG00000069956	5597	MAPK6	mitogen-activated protein kinase 6 [Source:HGNC Symbol;Acc:HGNC:6879]	645	755	476	741	781	908	840	1104	836	745	627	722	682	682
ENSMUSG00000007122	12372	Casq1	calsequestrin 1 [Source:MGI Symbol;Acc:MGI:1309468]	1	3	2	6	9	11	14	8	7	ENSG00000069966	10681	GNB5	G protein subunit beta 5 [Source:HGNC Symbol;Acc:HGNC:4401]	62	74	46	69	58	60	73	74	118	107	59	66	76	62
ENSMUSG00000007207	20907	Stx1a	syntaxin 1A (brain) [Source:MGI Symbol;Acc:MGI:109355]	37	55	61	53	50	59	66	50	54	ENSG00000069974	5873	RAB27A	RAB27A, member RAS oncogene family [Source:HGNC Symbol;Acc:HGNC:9766]	37	47	107	177	40	34	58	80	34	36	35	36	21	30
ENSMUSG00000007209	26368	Ceacam9	carcinoembryonic antigen-related cell adhesion molecule 9 [Source:MGI Symbol;Acc:MGI:1347247]	0	0	0	1	0	0	1	0	0	ENSG00000069998	27440	HDHD5	haloacid dehalogenase like hydrolase domain containing 5 [Source:HGNC Symbol;Acc:HGNC:1843]	80	118	64	74	159	133	121	134	58	68	65	61	81	77
ENSMUSG00000007216	243372	Zfp775	zinc finger protein 775 [Source:MGI Symbol;Acc:MGI:2683557]	125	107	158	125	140	144	145	186	125	ENSG00000070010	7353	UFD1	ubiquitin recognition factor in ER associated degradation 1 [Source:HGNC Symbol;Acc:HGNC:12520]	374	444	249	374	332	405	368	465	325	325	255	257	213	245
ENSMUSG00000007279	56788	Scube2	signal peptide, CUB domain, EGF-like 2 [Source:MGI Symbol;Acc:MGI:1928765]	28	12	46	38	61	20	69	41	132	ENSG00000070018	4040	LRP6	LDL receptor related protein 6 [Source:HGNC Symbol;Acc:HGNC:6698]	781	897	661	999	935	1008	888	1203	943	1008	874	1018	971	1149
ENSMUSG00000007338	18120	Mrpl49	mitochondrial ribosomal protein L49 [Source:MGI Symbol;Acc:MGI:108180]	383	327	508	392	426	565	400	484	566	ENSG00000070019	2984	GUCY2C	guanylate cyclase 2C [Source:HGNC Symbol;Acc:HGNC:4688]	0	0	1	0	0	0	0	0	1	1	1	0	0	0
ENSMUSG00000007379	329727	Dennd2c	DENN/MADD domain containing 2C [Source:MGI Symbol;Acc:MGI:3036254]	29	27	32	9	30	40	34	31	28	ENSG00000070031	6343	SCT	secretin [Source:HGNC Symbol;Acc:HGNC:10607]	0	1	0	0	1	0	0	0	0	0	0	1	0	0
ENSMUSG00000007411	17169	Mark3	MAP/microtubule affinity regulating kinase 3 [Source:MGI Symbol;Acc:MGI:1341865]	1483	1365	1885	1351	1542	1561	1493	1716	2020	ENSG00000070047	57661	PHRF1	PHD and ring finger domains 1 [Source:HGNC Symbol;Acc:HGNC:24351]	171	266	164	251	271	255	252	287	230	205	232	240	191	222
ENSMUSG00000007415	67210	Gatad1	GATA zinc finger domain containing 1 [Source:MGI Symbol;Acc:MGI:1914460]	970	844	1276	944	1086	1274	1022	1148	1455	ENSG00000070061	8518	ELP1	elongator complex protein 1 [Source:HGNC Symbol;Acc:HGNC:5959]	367	422	206	304	409	445	340	499	395	403	282	341	331	362
ENSMUSG00000007440	12943	Pcdha11	protocadherin alpha 11 [Source:MGI Symbol;Acc:MGI:1298372]	0	1	3	2	0	2	3	7	0	ENSG00000070081	4925	NUCB2	nucleobindin 2 [Source:HGNC Symbol;Acc:HGNC:8044]	184	255	361	570	185	214	217	346	307	289	164	192	199	183
ENSMUSG00000007457	.	2310003L06Rik	RIKEN cDNA 2310003L06 gene [Source:MGI Symbol;Acc:MGI:1921498]	0	1	0	0	2	0	0	0	0	ENSG00000070087	5217	PFN2	profilin 2 [Source:HGNC Symbol;Acc:HGNC:8882]	1582	1758	589	837	1690	1821	1620	2280	2004	2009	1264	1428	1038	1163
ENSMUSG00000007458	17113	M6pr	mannose-6-phosphate receptor, cation dependent [Source:MGI Symbol;Acc:MGI:96904]	836	719	1172	850	972	1137	1033	1073	1252	ENSG00000070159	5774	PTPN3	protein tyrosine phosphatase non-receptor type 3 [Source:HGNC Symbol;Acc:HGNC:9655]	8	4	67	139	5	8	26	15	18	13	12	9	17	24
ENSMUSG00000007476	241296	Lrrc8a	leucine rich repeat containing 8A VRAC subunit A [Source:MGI Symbol;Acc:MGI:2652847]	977	879	1255	924	1003	1339	879	947	1178	ENSG00000070182	6710	SPTB	spectrin beta, erythrocytic [Source:HGNC Symbol;Acc:HGNC:11274]	8	10	1	7	14	7	124	163	18	15	9	14	21	14
ENSMUSG00000007480	17203	Mc5r	melanocortin 5 receptor [Source:MGI Symbol;Acc:MGI:99420]	4	3	3	2	5	4	4	4	0	ENSG00000070190	27071	DAPP1	dual adaptor of phosphotyrosine and 3-phosphoinositides 1 [Source:HGNC Symbol;Acc:HGNC:16500]	0	2	0	2	2	1	2	1	0	1	2	0	0	2
ENSMUSG00000007564	51792	Ppp2r1a	protein phosphatase 2, regulatory subunit A, alpha [Source:MGI Symbol;Acc:MGI:1926334]	2566	2351	3180	2358	2508	3187	2569	3087	3262	ENSG00000070193	2255	FGF10	fibroblast growth factor 10 [Source:HGNC Symbol;Acc:HGNC:3666]	10	19	3	11	24	22	20	30	36	38	72	77	109	139
ENSMUSG00000007570	72775	Fance	Fanconi anemia, complementation group E [Source:MGI Symbol;Acc:MGI:1920025]	187	163	205	183	186	225	267	275	274	ENSG00000070214	23446	SLC44A1	solute carrier family 44 member 1 [Source:HGNC Symbol;Acc:HGNC:18798]	194	198	337	518	531	489	312	391	321	307	324	303	421	466
ENSMUSG00000007589	28113	Tinf2	Terf1 (TRF1)-interacting nuclear factor 2 [Source:MGI Symbol;Acc:MGI:107246]	581	562	690	548	615	633	632	593	629	ENSG00000070269	54916	TMEM260	transmembrane protein 260 [Source:HGNC Symbol;Acc:HGNC:20185]	107	113	101	154	72	81	92	119	100	104	98	97	90	98
ENSMUSG00000007591	71099	Tssk4	testis-specific serine kinase 4 [Source:MGI Symbol;Acc:MGI:1918349]	5	8	12	3	16	1	14	10	13	ENSG00000070366	23293	SMG6	SMG6 nonsense mediated mRNA decay factor [Source:HGNC Symbol;Acc:HGNC:17809]	468	533	375	521	541	556	377	544	422	464	381	431	417	447
ENSMUSG00000007594	330790	Hapln4	hyaluronan and proteoglycan link protein 4 [Source:MGI Symbol;Acc:MGI:2679531]	5	3	3	1	7	1	4	7	15	ENSG00000070367	10640	EXOC5	exocyst complex component 5 [Source:HGNC Symbol;Acc:HGNC:10696]	742	888	477	707	937	1018	923	1139	916	870	750	803	722	722
ENSMUSG00000007603	224907	Dus3l	dihydrouridine synthase 3-like (S. cerevisiae) [Source:MGI Symbol;Acc:MGI:2147092]	307	276	394	268	317	351	242	334	385	ENSG00000070371	8218	CLTCL1	clathrin heavy chain like 1 [Source:HGNC Symbol;Acc:HGNC:2093]	72	105	65	80	73	100	117	140	111	131	91	78	89	116
ENSMUSG00000007610	70359	Gtpbp3	GTP binding protein 3 [Source:MGI Symbol;Acc:MGI:1917609]	296	276	379	295	338	390	269	347	385	ENSG00000070388	27006	FGF22	fibroblast growth factor 22 [Source:HGNC Symbol;Acc:HGNC:3679]	1	7	4	2	2	2	2	2	6	7	6	2	3	5
ENSMUSG00000007613	21812	Tgfbr1	transforming growth factor, beta receptor I [Source:MGI Symbol;Acc:MGI:98728]	3274	2871	3747	2728	3152	3864	3492	3818	4141	ENSG00000070404	10272	FSTL3	follistatin like 3 [Source:HGNC Symbol;Acc:HGNC:3973]	41	49	50	61	37	21	37	62	41	48	29	34	37	41
ENSMUSG00000007617	26556	Homer1	homer scaffolding protein 1 [Source:MGI Symbol;Acc:MGI:1347345]	1001	904	1288	933	1024	1269	1675	1510	1491	ENSG00000070413	9993	DGCR2	DiGeorge syndrome critical region gene 2 [Source:HGNC Symbol;Acc:HGNC:2845]	442	490	353	526	673	680	556	719	468	509	433	443	418	446
ENSMUSG00000007646	114714	Rad51c	RAD51 paralog C [Source:MGI Symbol;Acc:MGI:2150020]	111	104	158	104	110	160	187	157	214	ENSG00000070423	55658	RNF126	ring finger protein 126 [Source:HGNC Symbol;Acc:HGNC:21151]	126	182	90	147	191	194	178	250	176	171	143	162	128	127
ENSMUSG00000007653	14401	Gabrb2	gamma-aminobutyric acid (GABA) A receptor, subunit beta 2 [Source:MGI Symbol;Acc:MGI:95620]	30	24	63	21	53	51	44	51	38	ENSG00000070444	4335	MNT	MAX network transcriptional repressor [Source:HGNC Symbol;Acc:HGNC:7188]	199	234	258	360	196	234	223	303	272	289	227	237	275	259
ENSMUSG00000007655	12389	Cav1	caveolin 1, caveolae protein [Source:MGI Symbol;Acc:MGI:102709]	19	12	17	9	20	17	64	32	44	ENSG00000070476	79364	ZXDC	ZXD family zinc finger C [Source:HGNC Symbol;Acc:HGNC:28160]	223	291	152	202	314	278	254	328	254	250	202	229	229	263
ENSMUSG00000007656	59046	Arpp19	cAMP-regulated phosphoprotein 19 [Source:MGI Symbol;Acc:MGI:1891691]	1383	1220	1842	1307	1471	1727	1211	1406	1533	ENSG00000070495	23210	JMJD6	jumonji domain containing 6, arginine demethylase and lysine hydroxylase [Source:HGNC Symbol;Acc:HGNC:19355]	60	76	51	65	73	86	67	109	75	83	55	69	34	50
ENSMUSG00000007659	12048	Bcl2l1	BCL2-like 1 [Source:MGI Symbol;Acc:MGI:88139]	441	355	565	426	441	552	552	585	667	ENSG00000070501	5423	POLB	DNA polymerase beta [Source:HGNC Symbol;Acc:HGNC:9174]	44	53	24	53	54	57	79	82	80	85	73	43	62	85
ENSMUSG00000007670	16549	Khsrp	KH-type splicing regulatory protein [Source:MGI Symbol;Acc:MGI:1336214]	4758	3893	6193	4319	4876	5882	5267	5465	6382	ENSG00000070526	55808	ST6GALNAC1	ST6 N-acetylgalactosaminide alpha-2,6-sialyltransferase 1 [Source:HGNC Symbol;Acc:HGNC:23614]	1	4	0	0	0	1	0	1	1	1	1	1	2	1
ENSMUSG00000007682	13371	Dio2	deiodinase, iodothyronine, type II [Source:MGI Symbol;Acc:MGI:1338833]	7	7	6	5	2	5	2	19	0	ENSG00000070540	55062	WIPI1	WD repeat domain, phosphoinositide interacting 1 [Source:HGNC Symbol;Acc:HGNC:25471]	87	96	382	606	40	37	135	185	177	180	58	60	76	88
ENSMUSG00000007721	234388	Ccdc124	coiled-coil domain containing 124 [Source:MGI Symbol;Acc:MGI:1916403]	362	333	539	368	400	517	235	380	498	ENSG00000070601	22844	FRMPD1	FERM and PDZ domain containing 1 [Source:HGNC Symbol;Acc:HGNC:29159]	2	3	2	3	2	2	150	165	1	2	3	2	1	0
ENSMUSG00000007739	12464	Cct4	chaperonin containing Tcp1, subunit 4 (delta) [Source:MGI Symbol;Acc:MGI:104689]	3378	2985	4664	3536	3903	4844	4255	4734	5296	ENSG00000070610	57704	GBA2	glucosylceramidase beta 2 [Source:HGNC Symbol;Acc:HGNC:18986]	302	413	189	293	301	273	257	307	307	283	180	240	267	317
ENSMUSG00000007777	66050	0610009B22Rik	RIKEN cDNA 0610009B22 gene [Source:MGI Symbol;Acc:MGI:1913300]	98	92	135	98	106	151	131	130	116	ENSG00000070614	3340	NDST1	N-deacetylase and N-sulfotransferase 1 [Source:HGNC Symbol;Acc:HGNC:7680]	1320	1674	2946	4670	1673	1676	1355	2054	1557	1578	1322	1401	750	913
ENSMUSG00000007783	78070	Cpt1c	carnitine palmitoyltransferase 1c [Source:MGI Symbol;Acc:MGI:2446526]	120	119	141	95	98	113	309	184	169	ENSG00000070669	440	ASNS	asparagine synthetase (glutamine-hydrolyzing) [Source:HGNC Symbol;Acc:HGNC:753]	649	736	551	816	364	410	473	551	590	579	250	291	280	309
ENSMUSG00000007805	13345	Twist2	twist basic helix-loop-helix transcription factor 2 [Source:MGI Symbol;Acc:MGI:104685]	28	37	20	29	37	26	28	18	31	ENSG00000070718	10947	AP3M2	adaptor related protein complex 3 subunit mu 2 [Source:HGNC Symbol;Acc:HGNC:570]	149	155	55	100	182	181	191	240	144	150	102	120	102	116
ENSMUSG00000007812	72611	Zfp655	zinc finger protein 655 [Source:MGI Symbol;Acc:MGI:1919861]	429	365	541	379	431	501	573	486	620	ENSG00000070729	1258	CNGB1	cyclic nucleotide gated channel subunit beta 1 [Source:HGNC Symbol;Acc:HGNC:2151]	3	9	1	0	1	2	5	5	22	18	4	2	7	13
ENSMUSG00000007815	11848	Rhoa	ras homolog family member A [Source:MGI Symbol;Acc:MGI:1096342]	3363	2878	4430	3186	3674	4561	3836	4146	4789	ENSG00000070731	10610	ST6GALNAC2	ST6 N-acetylgalactosaminide alpha-2,6-sialyltransferase 2 [Source:HGNC Symbol;Acc:HGNC:10867]	19	26	0	0	2	0	8	5	2	0	0	2	8	9
ENSMUSG00000007817	328365	Zmiz1	zinc finger, MIZ-type containing 1 [Source:MGI Symbol;Acc:MGI:3040693]	4674	3568	5183	3935	4093	4959	5431	5210	5381	ENSG00000070748	1103	CHAT	choline O-acetyltransferase [Source:HGNC Symbol;Acc:HGNC:1912]	4	3	0	0	3	11	8	8	0	1	4	3	2	1
ENSMUSG00000007827	232339	Ankrd26	ankyrin repeat domain 26 [Source:MGI Symbol;Acc:MGI:1917887]	508	476	578	473	553	562	426	527	552	ENSG00000070756	26986	PABPC1	poly(A) binding protein cytoplasmic 1 [Source:HGNC Symbol;Acc:HGNC:8554]	5124	5982	5082	8411	6460	6797	6729	10024	6435	6179	5392	6084	7678	8764
ENSMUSG00000007833	69748	Aldh16a1	aldehyde dehydrogenase 16 family, member A1 [Source:MGI Symbol;Acc:MGI:1916998]	273	256	420	235	335	421	360	429	464	ENSG00000070759	10420	TESK2	testis associated actin remodelling kinase 2 [Source:HGNC Symbol;Acc:HGNC:11732]	12	12	19	28	10	21	12	24	15	9	17	23	36	32
ENSMUSG00000007836	77134	Hnrnpa0	heterogeneous nuclear ribonucleoprotein A0 [Source:MGI Symbol;Acc:MGI:1924384]	5689	5281	8296	5553	6122	7649	5885	5909	7847	ENSG00000070761	29105	CFAP20	cilia and flagella associated protein 20 [Source:HGNC Symbol;Acc:HGNC:29523]	111	118	54	71	164	148	141	153	127	126	104	121	70	94
ENSMUSG00000007837	65116	Prrg2	proline-rich Gla (G-carboxyglutamic acid) polypeptide 2 [Source:MGI Symbol;Acc:MGI:1929596]	57	36	53	35	55	69	45	64	57	ENSG00000070770	1459	CSNK2A2	casein kinase 2 alpha 2 [Source:HGNC Symbol;Acc:HGNC:2459]	482	584	415	615	656	741	675	896	640	643	624	713	550	573
ENSMUSG00000007850	59013	Hnrnph1	heterogeneous nuclear ribonucleoprotein H1 [Source:MGI Symbol;Acc:MGI:1891925]	8479	7715	10444	7916	8548	10180	8203	9573	9843	ENSG00000070778	11099	PTPN21	protein tyrosine phosphatase non-receptor type 21 [Source:HGNC Symbol;Acc:HGNC:9651]	166	208	192	371	213	216	301	383	256	254	212	214	199	206
ENSMUSG00000007867	76411	Ift43	intraflagellar transport 43 [Source:MGI Symbol;Acc:MGI:1923661]	108	84	195	101	110	133	138	127	192	ENSG00000070785	8891	EIF2B3	eukaryotic translation initiation factor 2B subunit gamma [Source:HGNC Symbol;Acc:HGNC:3259]	82	88	38	55	65	83	67	84	56	48	40	62	82	79
ENSMUSG00000007872	15903	Id3	inhibitor of DNA binding 3 [Source:MGI Symbol;Acc:MGI:96398]	564	495	714	572	600	540	804	747	996	ENSG00000070808	815	CAMK2A	calcium/calmodulin dependent protein kinase II alpha [Source:HGNC Symbol;Acc:HGNC:1460]	10	9	12	15	31	32	39	61	59	43	22	15	21	31
ENSMUSG00000007877	21393	Tcap	titin-cap [Source:MGI Symbol;Acc:MGI:1330233]	5	0	2	0	1	0	4	3	0	ENSG00000070814	6949	TCOF1	treacle ribosome biogenesis factor 1 [Source:HGNC Symbol;Acc:HGNC:11654]	272	352	193	249	421	436	393	500	327	293	213	248	287	352
ENSMUSG00000007880	93760	Arid1a	AT rich interactive domain 1A (SWI-like) [Source:MGI Symbol;Acc:MGI:1935147]	8285	6843	9392	7143	7999	9430	8177	9155	10086	ENSG00000070831	998	CDC42	cell division cycle 42 [Source:HGNC Symbol;Acc:HGNC:1736]	1451	1684	1363	2209	1458	1619	1573	2119	1615	1550	1188	1316	1564	1758
ENSMUSG00000007888	12931	Crlf1	cytokine receptor-like factor 1 [Source:MGI Symbol;Acc:MGI:1340030]	91	90	62	24	35	87	60	37	48	ENSG00000070882	26031	OSBPL3	oxysterol binding protein like 3 [Source:HGNC Symbol;Acc:HGNC:16370]	169	176	35	52	253	282	162	232	291	266	144	200	79	93
ENSMUSG00000007891	13033	Ctsd	cathepsin D [Source:MGI Symbol;Acc:MGI:88562]	552	472	708	540	647	744	797	755	916	ENSG00000070886	2046	EPHA8	EPH receptor A8 [Source:HGNC Symbol;Acc:HGNC:3391]	1	0	1	2	0	0	0	1	6	3	2	2	7	4
ENSMUSG00000007892	56040	Rplp1	ribosomal protein, large, P1 [Source:MGI Symbol;Acc:MGI:1927099]	2376	2279	3878	2775	2929	3974	3024	3085	4453	ENSG00000070915	6559	SLC12A3	solute carrier family 12 member 3 [Source:HGNC Symbol;Acc:HGNC:10912]	0	1	1	1	0	1	2	1	1	2	4	1	0	0
ENSMUSG00000007907	70977	Cabs1	calcium binding protein, spermatid specific 1 [Source:MGI Symbol;Acc:MGI:1918227]	0	0	0	0	4	0	0	0	0	ENSG00000070950	56852	RAD18	RAD18 E3 ubiquitin protein ligase [Source:HGNC Symbol;Acc:HGNC:18278]	255	313	123	196	305	349	303	439	252	223	210	252	151	218
ENSMUSG00000007908	208982	Hmgcll1	3-hydroxymethyl-3-methylglutaryl-Coenzyme A lyase-like 1 [Source:MGI Symbol;Acc:MGI:2446108]	43	28	40	41	59	47	61	53	70	ENSG00000070961	490	ATP2B1	ATPase plasma membrane Ca2+ transporting 1 [Source:HGNC Symbol;Acc:HGNC:814]	778	909	460	656	375	418	1113	1459	613	589	251	367	392	453
ENSMUSG00000007944	73032	Ttc9b	tetratricopeptide repeat domain 9B [Source:MGI Symbol;Acc:MGI:1920282]	19	17	18	2	7	12	5	6	6	ENSG00000070985	29850	TRPM5	transient receptor potential cation channel subfamily M member 5 [Source:HGNC Symbol;Acc:HGNC:14323]	1	1	0	0	0	0	0	0	1	0	0	1	0	0
ENSMUSG00000007946	11859	Phox2a	paired-like homeobox 2a [Source:MGI Symbol;Acc:MGI:106633]	6	7	3	9	8	5	4	15	14	ENSG00000071051	8440	NCK2	NCK adaptor protein 2 [Source:HGNC Symbol;Acc:HGNC:7665]	302	380	177	273	195	205	178	220	163	198	119	150	127	138
ENSMUSG00000007950	64296	Abhd8	abhydrolase domain containing 8 [Source:MGI Symbol;Acc:MGI:1918946]	371	319	530	334	374	578	312	375	433	ENSG00000071054	9448	MAP4K4	mitogen-activated protein kinase kinase kinase kinase 4 [Source:HGNC Symbol;Acc:HGNC:6866]	1142	1364	866	1467	1706	1769	1864	2450	1643	1691	1262	1476	1216	1318
ENSMUSG00000007987	67286	Ift22	intraflagellar transport 22 [Source:MGI Symbol;Acc:MGI:1914536]	213	220	268	224	229	329	155	239	303	ENSG00000071073	11320	MGAT4A	alpha-1,3-mannosyl-glycoprotein 4-beta-N-acetylglucosaminyltransferase A [Source:HGNC Symbol;Acc:HGNC:7047]	80	92	15	18	200	223	97	130	155	134	145	178	129	139
ENSMUSG00000007989	14365	Fzd3	frizzled class receptor 3 [Source:MGI Symbol;Acc:MGI:108476]	6414	5815	7878	5758	6649	7400	7415	7501	8113	ENSG00000071082	6160	RPL31	ribosomal protein L31 [Source:HGNC Symbol;Acc:HGNC:10334]	1007	1116	1200	1923	1235	1451	1444	1752	1076	1070	965	1036	1222	1321
ENSMUSG00000008028	69349	1700008O03Rik	RIKEN cDNA 1700008O03 gene [Source:MGI Symbol;Acc:MGI:1916599]	13	9	8	8	8	19	8	20	21	ENSG00000071127	9948	WDR1	WD repeat domain 1 [Source:HGNC Symbol;Acc:HGNC:12754]	1072	1216	1389	2149	711	759	684	982	1105	1123	664	799	554	574
ENSMUSG00000008035	68041	Mid1ip1	Mid1 interacting protein 1 (gastrulation specific G12-like (zebrafish)) [Source:MGI Symbol;Acc:MGI:1915291]	197	218	317	211	225	296	253	293	301	ENSG00000071189	23161	SNX13	sorting nexin 13 [Source:HGNC Symbol;Acc:HGNC:21335]	368	428	323	436	499	527	517	665	498	447	407	477	346	424
ENSMUSG00000008036	232910	Ap2s1	adaptor-related protein complex 2, sigma 1 subunit [Source:MGI Symbol;Acc:MGI:2141861]	336	313	480	308	365	446	392	446	523	ENSG00000071203	54860	MS4A12	membrane spanning 4-domains A12 [Source:HGNC Symbol;Acc:HGNC:13370]	1	0	0	0	0	0	0	0	0	1	0	0	0	0
ENSMUSG00000008090	116701	Fgfrl1	fibroblast growth factor receptor-like 1 [Source:MGI Symbol;Acc:MGI:2150920]	274	227	295	205	207	279	157	233	274	ENSG00000071205	79658	ARHGAP10	Rho GTPase activating protein 10 [Source:HGNC Symbol;Acc:HGNC:26099]	51	73	454	762	18	18	124	194	75	57	44	41	22	34
ENSMUSG00000008129	74666	4930432K21Rik	RIKEN cDNA 4930432K21 gene [Source:MGI Symbol;Acc:MGI:1921916]	20	11	12	13	12	11	29	18	38	ENSG00000071242	6196	RPS6KA2	ribosomal protein S6 kinase A2 [Source:HGNC Symbol;Acc:HGNC:10431]	350	448	522	759	567	631	479	619	480	489	378	460	247	267
ENSMUSG00000008136	14200	Fhl2	four and a half LIM domains 2 [Source:MGI Symbol;Acc:MGI:1338762]	22	19	19	21	18	14	31	24	29	ENSG00000071243	54556	ING3	inhibitor of growth family member 3 [Source:HGNC Symbol;Acc:HGNC:14587]	70	90	62	70	119	128	110	143	85	108	81	77	58	65
ENSMUSG00000008140	69683	Emc10	ER membrane protein complex subunit 10 [Source:MGI Symbol;Acc:MGI:1916933]	540	440	649	584	511	626	649	652	725	ENSG00000071246	22846	VASH1	vasohibin 1 [Source:HGNC Symbol;Acc:HGNC:19964]	457	548	453	728	337	347	541	666	437	456	275	330	333	398
ENSMUSG00000008153	232370	Clstn3	calsyntenin 3 [Source:MGI Symbol;Acc:MGI:2178323]	97	76	138	93	112	114	129	127	96	ENSG00000071282	29995	LMCD1	LIM and cysteine rich domains 1 [Source:HGNC Symbol;Acc:HGNC:6633]	34	46	344	573	68	87	94	112	145	124	127	120	58	71
ENSMUSG00000008167	68628	Fbxw9	F-box and WD-40 domain protein 9 [Source:MGI Symbol;Acc:MGI:1915878]	80	99	126	73	71	119	103	108	116	ENSG00000071462	114049	BUD23	BUD23 rRNA methyltransferase and ribosome maturation factor [Source:HGNC Symbol;Acc:HGNC:16405]	134	152	112	137	170	160	166	262	169	153	116	123	131	170
ENSMUSG00000008193	272382	Spib	Spi-B transcription factor (Spi-1/PU.1 related) [Source:MGI Symbol;Acc:MGI:892986]	1	1	2	1	5	4	2	10	9	ENSG00000071537	6400	SEL1L	SEL1L adaptor subunit of ERAD E3 ubiquitin ligase [Source:HGNC Symbol;Acc:HGNC:10717]	607	750	1057	1669	562	608	671	837	790	691	470	588	383	435
ENSMUSG00000008200	55935	Fnbp4	formin binding protein 4 [Source:MGI Symbol;Acc:MGI:1860513]	1407	1134	1349	1112	1201	1361	1311	1406	1440	ENSG00000071539	9319	TRIP13	thyroid hormone receptor interactor 13 [Source:HGNC Symbol;Acc:HGNC:12307]	265	303	104	164	203	207	232	359	163	139	117	122	69	87
ENSMUSG00000008206	67260	Cers4	ceramide synthase 4 [Source:MGI Symbol;Acc:MGI:1914510]	273	233	281	223	289	283	398	376	328	ENSG00000071553	537	ATP6AP1	ATPase H+ transporting accessory protein 1 [Source:HGNC Symbol;Acc:HGNC:868]	673	765	722	1121	608	618	541	778	699	659	523	567	374	452
ENSMUSG00000008226	74616	Scrn3	secernin 3 [Source:MGI Symbol;Acc:MGI:1921866]	112	75	95	80	120	130	178	120	152	ENSG00000071564	6929	TCF3	transcription factor 3 [Source:HGNC Symbol;Acc:HGNC:11633]	907	1191	524	877	1430	1438	1868	2521	1276	1327	1085	1222	1139	1280
ENSMUSG00000008301	56698	Phax	phosphorylated adaptor for RNA export [Source:MGI Symbol;Acc:MGI:1891839]	511	493	688	492	636	694	494	492	728	ENSG00000071575	28951	TRIB2	tribbles pseudokinase 2 [Source:HGNC Symbol;Acc:HGNC:30809]	1175	1406	530	833	1909	1976	996	1396	758	695	655	691	433	500
ENSMUSG00000008305	21885	Tle1	transducin-like enhancer of split 1 [Source:MGI Symbol;Acc:MGI:104636]	1269	1184	1509	1024	1280	1423	1388	1403	1342	ENSG00000071626	26528	DAZAP1	DAZ associated protein 1 [Source:HGNC Symbol;Acc:HGNC:2683]	223	264	165	240	222	209	255	337	234	195	183	197	212	245
ENSMUSG00000008307	77036	1700109H08Rik	RIKEN cDNA 1700109H08 gene [Source:MGI Symbol;Acc:MGI:1924286]	99	81	84	71	76	41	113	143	93	ENSG00000071655	53615	MBD3	methyl-CpG binding domain protein 3 [Source:HGNC Symbol;Acc:HGNC:6918]	623	772	517	745	987	1067	816	1153	671	706	614	724	538	613
ENSMUSG00000008318	320100	Relt	RELT tumor necrosis factor receptor [Source:MGI Symbol;Acc:MGI:2443373]	62	43	52	43	80	61	55	70	62	ENSG00000071677	51052	PRLH	prolactin releasing hormone [Source:HGNC Symbol;Acc:HGNC:17945]	0	0	0	0	0	0	0	0	0	0	0	0	0	0
ENSMUSG00000008333	20639	Snrpb2	U2 small nuclear ribonucleoprotein B [Source:MGI Symbol;Acc:MGI:104805]	660	589	969	625	857	949	683	903	960	ENSG00000071794	6596	HLTF	helicase like transcription factor [Source:HGNC Symbol;Acc:HGNC:11099]	402	403	193	298	624	634	533	637	508	498	464	526	629	674
ENSMUSG00000008348	22190	Ubc	ubiquitin C [Source:MGI Symbol;Acc:MGI:98889]	4356	3705	5583	3908	4339	5681	3627	4253	5265	ENSG00000071859	9130	FAM50A	family with sequence similarity 50 member A [Source:HGNC Symbol;Acc:HGNC:18786]	84	122	130	170	100	124	112	158	93	104	89	89	100	100
ENSMUSG00000008373	68988	Prpf31	pre-mRNA processing factor 31 [Source:MGI Symbol;Acc:MGI:1916238]	936	836	1341	910	1087	1221	967	1110	1281	ENSG00000071889	60343	FAM3A	family with sequence similarity 3 member A [Source:HGNC Symbol;Acc:HGNC:13749]	52	68	39	66	66	43	48	93	60	62	39	60	54	51
ENSMUSG00000008384	55942	Sertad1	SERTA domain containing 1 [Source:MGI Symbol;Acc:MGI:1913438]	29	16	46	24	39	47	57	52	54	ENSG00000071894	29894	CPSF1	cleavage and polyadenylation specific factor 1 [Source:HGNC Symbol;Acc:HGNC:2324]	467	618	371	554	632	696	639	811	558	557	583	656	526	584
ENSMUSG00000008393	52502	Carhsp1	calcium regulated heat stable protein 1 [Source:MGI Symbol;Acc:MGI:1196368]	608	585	742	501	551	816	772	726	711	ENSG00000071909	140469	MYO3B	myosin IIIB [Source:HGNC Symbol;Acc:HGNC:15576]	6	6	0	1	0	1	6	12	4	6	1	3	4	3
ENSMUSG00000008398	13713	Elk3	ELK3, member of ETS oncogene family [Source:MGI Symbol;Acc:MGI:101762]	394	273	356	239	252	415	360	392	341	ENSG00000071967	79901	CYBRD1	cytochrome b reductase 1 [Source:HGNC Symbol;Acc:HGNC:20797]	140	189	925	1538	70	77	199	287	154	144	120	131	76	93
ENSMUSG00000008429	80517	Herpud2	HERPUD family member 2 [Source:MGI Symbol;Acc:MGI:1915393]	597	449	724	490	491	645	565	533	583	ENSG00000071991	28513	CDH19	cadherin 19 [Source:HGNC Symbol;Acc:HGNC:1758]	6	4	0	1	0	1	0	2	3	7	4	2	2	1
ENSMUSG00000008435	108841	Rdh13	retinol dehydrogenase 13 (all-trans and 9-cis) [Source:MGI Symbol;Acc:MGI:1918732]	392	285	432	312	316	392	344	413	437	ENSG00000071994	5134	PDCD2	programmed cell death 2 [Source:HGNC Symbol;Acc:HGNC:8762]	170	240	131	191	195	278	218	251	200	201	170	175	178	182
ENSMUSG00000008438	56622	Adam21	a disintegrin and metallopeptidase domain 21 [Source:MGI Symbol;Acc:MGI:1861229]	9	7	7	12	2	4	11	9	12	ENSG00000072041	55117	SLC6A15	solute carrier family 6 member 15 [Source:HGNC Symbol;Acc:HGNC:13621]	185	206	13	26	100	108	89	122	162	142	166	184	89	117
ENSMUSG00000008450	68051	Nutf2	nuclear transport factor 2 [Source:MGI Symbol;Acc:MGI:1915301]	1460	1212	1889	1340	1606	2041	1356	1705	2024	ENSG00000072042	51109	RDH11	retinol dehydrogenase 11 [Source:HGNC Symbol;Acc:HGNC:17964]	325	362	377	567	425	433	443	588	417	340	272	295	262	258
ENSMUSG00000008461	14343	Fut1	fucosyltransferase 1 [Source:MGI Symbol;Acc:MGI:109375]	0	4	5	0	4	1	14	3	1	ENSG00000072062	5566	PRKACA	protein kinase cAMP-activated catalytic subunit alpha [Source:HGNC Symbol;Acc:HGNC:9380]	516	630	557	747	520	564	524	752	458	500	388	449	320	370
ENSMUSG00000008475	67771	Arpc5	actin related protein 2/3 complex, subunit 5 [Source:MGI Symbol;Acc:MGI:1915021]	601	575	842	575	717	809	466	619	736	ENSG00000072071	22859	ADGRL1	adhesion G protein-coupled receptor L1 [Source:HGNC Symbol;Acc:HGNC:20973]	596	748	491	779	185	187	520	678	624	697	207	280	567	686
ENSMUSG00000008482	67504	Rnf151	ring finger protein 151 [Source:MGI Symbol;Acc:MGI:1914754]	4	6	5	7	6	7	12	12	8	ENSG00000072080	6694	SPP2	secreted phosphoprotein 2 [Source:HGNC Symbol;Acc:HGNC:11256]	1	0	0	0	0	0	0	0	0	0	0	0	0	0
ENSMUSG00000008489	15569	Elavl2	ELAV like RNA binding protein 1 [Source:MGI Symbol;Acc:MGI:1100887]	416	352	526	396	508	530	422	510	568	ENSG00000072110	87	ACTN1	actinin alpha 1 [Source:HGNC Symbol;Acc:HGNC:163]	1848	2078	3259	5100	1051	1169	1239	1635	1866	1945	1109	1389	567	641
ENSMUSG00000008496	18987	Pou2f2	POU domain, class 2, transcription factor 2 [Source:MGI Symbol;Acc:MGI:101897]	52	45	26	32	19	37	27	59	31	ENSG00000072121	23503	ZFYVE26	zinc finger FYVE-type containing 26 [Source:HGNC Symbol;Acc:HGNC:20761]	361	439	373	534	412	415	428	525	436	437	340	449	413	425
ENSMUSG00000008540	56615	Mgst1	microsomal glutathione S-transferase 1 [Source:MGI Symbol;Acc:MGI:1913850]	49	44	63	44	47	74	68	28	69	ENSG00000072133	27330	RPS6KA6	ribosomal protein S6 kinase A6 [Source:HGNC Symbol;Acc:HGNC:10435]	34	29	32	38	94	106	70	111	122	103	102	105	103	105
ENSMUSG00000008575	18028	Nfib	nuclear factor I/B [Source:MGI Symbol;Acc:MGI:103188]	337	347	269	203	237	250	223	279	168	ENSG00000072134	22905	EPN2	epsin 2 [Source:HGNC Symbol;Acc:HGNC:18639]	692	812	306	509	466	492	322	473	418	372	324	345	299	333
ENSMUSG00000008590	57014	Htr3b	5-hydroxytryptamine (serotonin) receptor 3B [Source:MGI Symbol;Acc:MGI:1861899]	32	40	49	33	34	70	20	38	35	ENSG00000072135	26469	PTPN18	protein tyrosine phosphatase non-receptor type 18 [Source:HGNC Symbol;Acc:HGNC:9649]	47	54	36	77	49	61	74	95	48	50	34	35	53	76
ENSMUSG00000008601	53868	Rab25	RAB25, member RAS oncogene family [Source:MGI Symbol;Acc:MGI:1858203]	20	27	39	40	31	54	42	46	53	ENSG00000072163	55679	LIMS2	LIM zinc finger domain containing 2 [Source:HGNC Symbol;Acc:HGNC:16084]	23	31	193	288	7	12	53	83	80	67	22	18	35	29
ENSMUSG00000008604	94232	Ubqln4	ubiquilin 4 [Source:MGI Symbol;Acc:MGI:2150152]	1573	1415	2013	1530	1644	2031	1644	1799	2051	ENSG00000072182	55515	ASIC4	acid sensing ion channel subunit family member 4 [Source:HGNC Symbol;Acc:HGNC:21263]	8	7	1	3	8	9	15	27	19	10	10	24	9	18
ENSMUSG00000008658	268859	Rbfox1	RNA binding protein, fox-1 homolog (C. elegans) 1 [Source:MGI Symbol;Acc:MGI:1926224]	3	2	1	4	1	1	0	10	2	ENSG00000072195	10290	SPEG	striated muscle enriched protein kinase [Source:HGNC Symbol;Acc:HGNC:16901]	59	84	242	377	141	142	268	378	173	171	125	143	190	208
ENSMUSG00000008668	20084	Rps18	ribosomal protein S18 [Source:MGI Symbol;Acc:MGI:98146]	2344	2158	3630	2537	2710	3561	3485	3263	4474	ENSG00000072201	84708	LNX1	ligand of numb-protein X 1 [Source:HGNC Symbol;Acc:HGNC:6657]	28	24	8	13	17	37	16	44	24	16	19	11	8	24
ENSMUSG00000008682	110954	Rpl10	ribosomal protein L10 [Source:MGI Symbol;Acc:MGI:105943]	7208	6547	10436	7297	8382	10403	9588	9929	11915	ENSG00000072210	224	ALDH3A2	aldehyde dehydrogenase 3 family member A2 [Source:HGNC Symbol;Acc:HGNC:403]	283	308	119	143	248	225	203	263	227	194	131	156	244	289
ENSMUSG00000008683	267019	Rps15a	ribosomal protein S15A [Source:MGI Symbol;Acc:MGI:2389091]	2171	1921	3196	2253	2284	2876	2687	2715	3649	ENSG00000072274	7037	TFRC	transferrin receptor [Source:HGNC Symbol;Acc:HGNC:11763]	578	701	279	439	443	563	656	754	777	767	474	554	522	539
ENSMUSG00000008690	52683	Ncaph2	non-SMC condensin II complex, subunit H2 [Source:MGI Symbol;Acc:MGI:1289164]	1557	1250	1911	1395	1529	1902	2227	2027	2320	ENSG00000072310	6720	SREBF1	sterol regulatory element binding transcription factor 1 [Source:HGNC Symbol;Acc:HGNC:11289]	359	427	635	1019	366	478	479	662	410	384	325	372	381	413
ENSMUSG00000008730	15257	Hipk1	homeodomain interacting protein kinase 1 [Source:MGI Symbol;Acc:MGI:1314873]	1792	1498	2145	1512	1723	2047	1835	1840	2087	ENSG00000072315	7224	TRPC5	transient receptor potential cation channel subfamily C member 5 [Source:HGNC Symbol;Acc:HGNC:12337]	7	15	5	5	8	14	5	8	15	11	5	12	12	17
ENSMUSG00000008734	64297	Gprc5b	G protein-coupled receptor, family C, group 5, member B [Source:MGI Symbol;Acc:MGI:1927596]	481	437	646	431	467	602	483	513	544	ENSG00000072364	27125	AFF4	AF4/FMR2 family member 4 [Source:HGNC Symbol;Acc:HGNC:17869]	2216	2495	2045	3266	2081	2226	2192	3006	2731	2635	1827	2196	2289	2541
ENSMUSG00000008763	17156	Man1a2	mannosidase, alpha, class 1A, member 2 [Source:MGI Symbol;Acc:MGI:104676]	1698	1372	2003	1515	1655	2026	1545	1985	2228	ENSG00000072401	7321	UBE2D1	ubiquitin conjugating enzyme E2 D1 [Source:HGNC Symbol;Acc:HGNC:12474]	105	148	88	132	148	160	185	227	132	131	115	132	107	143
ENSMUSG00000008789	73250	Ceacam5	carcinoembryonic antigen-related cell adhesion molecule 5 [Source:MGI Symbol;Acc:MGI:1920500]	0	0	0	0	0	0	0	0	0	ENSG00000072415	64398	MPP5	membrane palmitoylated protein 5 [Source:HGNC Symbol;Acc:HGNC:18669]	271	307	158	222	609	632	298	464	625	604	503	611	536	618
ENSMUSG00000008813	219038	Tppp2	tubulin polymerization-promoting protein family member 2 [Source:MGI Symbol;Acc:MGI:2684923]	0	0	0	0	0	0	0	0	0	ENSG00000072422	9886	RHOBTB1	Rho related BTB domain containing 1 [Source:HGNC Symbol;Acc:HGNC:18738]	150	197	333	523	129	138	205	282	201	186	161	203	105	129
ENSMUSG00000008822	66204	Acyp1	acylphosphatase 1, erythrocyte (common) type [Source:MGI Symbol;Acc:MGI:1913454]	32	31	53	41	31	61	43	38	42	ENSG00000072501	8243	SMC1A	structural maintenance of chromosomes 1A [Source:HGNC Symbol;Acc:HGNC:11111]	954	1105	384	588	1446	1598	1257	1728	1086	1016	986	1102	785	846
ENSMUSG00000008843	57255	Cldn13	claudin 13 [Source:MGI Symbol;Acc:MGI:1913102]	4	6	3	1	0	2	0	2	3	ENSG00000072506	3028	HSD17B10	hydroxysteroid 17-beta dehydrogenase 10 [Source:HGNC Symbol;Acc:HGNC:4800]	100	106	66	104	112	97	136	165	81	92	67	85	67	58
ENSMUSG00000008845	93671	Cd163	CD163 antigen [Source:MGI Symbol;Acc:MGI:2135946]	0	1	0	0	1	0	0	0	0	ENSG00000072518	2011	MARK2	microtubule affinity regulating kinase 2 [Source:HGNC Symbol;Acc:HGNC:3332]	213	302	140	244	362	403	246	391	324	287	243	250	238	268
ENSMUSG00000008855	15184	Hdac5	histone deacetylase 5 [Source:MGI Symbol;Acc:MGI:1333784]	405	325	391	282	363	406	660	561	503	ENSG00000072571	3161	HMMR	hyaluronan mediated motility receptor [Source:HGNC Symbol;Acc:HGNC:5012]	156	171	68	107	165	172	168	220	200	195	215	193	192	225
ENSMUSG00000008859	56044	Rala	v-ral simian leukemia viral oncogene A (ras related) [Source:MGI Symbol;Acc:MGI:1927243]	681	558	814	572	582	750	715	702	842	ENSG00000072609	55743	CHFR	checkpoint with forkhead and ring finger domains [Source:HGNC Symbol;Acc:HGNC:20455]	245	295	203	353	267	284	221	290	249	206	156	250	218	228
ENSMUSG00000008874	403395	Clec3a	C-type lectin domain family 3, member a [Source:MGI Symbol;Acc:MGI:2685642]	0	0	0	0	1	0	0	0	0	ENSG00000072657	29953	TRHDE	thyrotropin releasing hormone degrading enzyme [Source:HGNC Symbol;Acc:HGNC:30748]	17	24	8	15	5	5	9	18	27	22	21	13	21	10
ENSMUSG00000008892	22335	Vdac3	voltage-dependent anion channel 3 [Source:MGI Symbol;Acc:MGI:106922]	1051	942	1367	1059	1144	1471	1123	1239	1522	ENSG00000072682	8974	P4HA2	prolyl 4-hydroxylase subunit alpha 2 [Source:HGNC Symbol;Acc:HGNC:8547]	29	37	190	288	21	20	72	91	73	46	25	26	23	34
ENSMUSG00000008932	242607	Slc1a7	solute carrier family 1 (glutamate transporter), member 7 [Source:MGI Symbol;Acc:MGI:2444087]	0	4	0	0	0	0	3	2	2	ENSG00000072694	2213	FCGR2B	Fc fragment of IgG receptor IIb [Source:HGNC Symbol;Acc:HGNC:3618]	1	1	1	2	2	2	1	2	11	8	5	2	4	0
ENSMUSG00000008958	21427	Vps72	vacuolar protein sorting 72 [Source:MGI Symbol;Acc:MGI:1202305]	871	720	1068	731	800	1072	791	914	1092	ENSG00000072736	4775	NFATC3	nuclear factor of activated T cells 3 [Source:HGNC Symbol;Acc:HGNC:7777]	608	683	335	477	612	779	732	951	667	684	597	682	507	592
ENSMUSG00000008976	14390	Gabpa	GA repeat binding protein, alpha [Source:MGI Symbol;Acc:MGI:95610]	1132	995	1366	1062	1247	1503	1183	1324	1398	ENSG00000072756	51095	TRNT1	tRNA nucleotidyl transferase 1 [Source:HGNC Symbol;Acc:HGNC:17341]	86	115	90	138	115	121	100	140	102	102	58	100	80	91
ENSMUSG00000008999	12162	Bmp7	bone morphogenetic protein 7 [Source:MGI Symbol;Acc:MGI:103302]	658	644	800	600	699	839	944	790	924	ENSG00000072778	37	ACADVL	acyl-CoA dehydrogenase very long chain [Source:HGNC Symbol;Acc:HGNC:92]	303	359	282	445	436	444	358	449	328	284	253	294	328	324
ENSMUSG00000009013	56455	Dynll1	dynein light chain LC8-type 1 [Source:MGI Symbol;Acc:MGI:1861457]	2068	1913	3132	2198	2496	3114	1772	2519	3222	ENSG00000072786	6793	STK10	serine/threonine kinase 10 [Source:HGNC Symbol;Acc:HGNC:11388]	539	651	538	786	244	266	136	196	220	228	181	210	108	121
ENSMUSG00000009030	67466	Pdcl	phosducin-like [Source:MGI Symbol;Acc:MGI:1914716]	508	451	635	452	563	544	486	553	631	ENSG00000072803	23291	FBXW11	F-box and WD repeat domain containing 11 [Source:HGNC Symbol;Acc:HGNC:13607]	517	633	437	708	747	834	632	834	725	684	605	651	550	621
ENSMUSG00000009035	223693	Tmem184b	transmembrane protein 184b [Source:MGI Symbol;Acc:MGI:2445179]	638	531	795	530	578	757	556	569	762	ENSG00000072818	9744	ACAP1	ArfGAP with coiled-coil, ankyrin repeat and PH domains 1 [Source:HGNC Symbol;Acc:HGNC:16467]	23	39	44	65	32	37	52	56	70	71	44	52	55	62
ENSMUSG00000009047	.	Gm5965	predicted gene 5965 [Source:MGI Symbol;Acc:MGI:3645197]	0	1	0	0	0	0	0	0	0	ENSG00000072832	1400	CRMP1	collapsin response mediator protein 1 [Source:HGNC Symbol;Acc:HGNC:2365]	930	1040	158	276	1600	1635	1391	2087	1626	1613	1270	1492	796	1025
ENSMUSG00000009070	71236	Rsph14	radial spoke head homolog 14 (Chlamydomonas) [Source:MGI Symbol;Acc:MGI:1918486]	0	1	3	2	0	0	0	0	0	ENSG00000072840	2121	EVC	EvC ciliary complex subunit 1 [Source:HGNC Symbol;Acc:HGNC:3497]	177	207	233	369	163	167	154	233	180	168	131	144	180	172
ENSMUSG00000009073	18016	Nf2	neurofibromin 2 [Source:MGI Symbol;Acc:MGI:97307]	1409	1139	1665	1245	1405	1702	1488	1696	1850	ENSG00000072849	51009	DERL2	derlin 2 [Source:HGNC Symbol;Acc:HGNC:17943]	174	179	169	191	160	183	193	250	176	180	140	150	109	102
ENSMUSG00000009075	192650	Cabp7	calcium binding protein 7 [Source:MGI Symbol;Acc:MGI:2183437]	5	2	5	2	2	10	9	5	3	ENSG00000072858	54847	SIDT1	SID1 transmembrane family member 1 [Source:HGNC Symbol;Acc:HGNC:25967]	1	4	7	5	2	2	2	4	8	12	4	5	9	6
ENSMUSG00000009076	67178	Zmat5	zinc finger, matrin type 5 [Source:MGI Symbol;Acc:MGI:1914428]	61	67	86	48	64	65	79	78	97	ENSG00000072864	54820	NDE1	nudE neurodevelopment protein 1 [Source:HGNC Symbol;Acc:HGNC:17619]	140	178	144	200	193	200	193	290	205	205	156	176	166	261
ENSMUSG00000009079	14030	Ewsr1	Ewing sarcoma breakpoint region 1 [Source:MGI Symbol;Acc:MGI:99960]	4251	3619	4920	3919	3960	4859	4190	4497	4979	ENSG00000072952	10335	MRVI1	murine retrovirus integration site 1 homolog [Source:HGNC Symbol;Acc:HGNC:7237]	48	78	34	43	35	28	63	74	118	98	55	72	58	39
ENSMUSG00000009090	11764	Ap1b1	adaptor protein complex AP-1, beta 1 subunit [Source:MGI Symbol;Acc:MGI:1096368]	872	749	1204	865	918	1074	947	895	1160	ENSG00000072954	79041	TMEM38A	transmembrane protein 38A [Source:HGNC Symbol;Acc:HGNC:28462]	8	11	2	9	35	29	43	64	26	18	27	18	22	29
ENSMUSG00000009092	70377	Derl3	Der1-like domain family, member 3 [Source:MGI Symbol;Acc:MGI:1917627]	9	14	25	19	18	25	27	15	23	ENSG00000072958	8907	AP1M1	adaptor related protein complex 1 subunit mu 1 [Source:HGNC Symbol;Acc:HGNC:13667]	352	369	271	505	346	479	445	579	412	419	315	355	289	306
ENSMUSG00000009093	75886	Gstt4	glutathione S-transferase, theta 4 [Source:MGI Symbol;Acc:MGI:1923136]	0	0	0	0	0	0	0	0	0	ENSG00000073008	5817	PVR	PVR cell adhesion molecule [Source:HGNC Symbol;Acc:HGNC:9705]	147	162	489	854	136	125	115	178	150	139	83	90	119	130
ENSMUSG00000009097	21380	Tbx1	T-box 1 [Source:MGI Symbol;Acc:MGI:98493]	25	20	29	34	7	10	22	19	24	ENSG00000073050	7515	XRCC1	X-ray repair cross complementing 1 [Source:HGNC Symbol;Acc:HGNC:12828]	99	151	74	103	184	189	108	180	147	162	132	163	167	167
ENSMUSG00000009108	14686	Gnat2	guanine nucleotide binding protein, alpha transducing 2 [Source:MGI Symbol;Acc:MGI:95779]	3	4	10	12	8	6	14	13	15	ENSG00000073060	949	SCARB1	scavenger receptor class B member 1 [Source:HGNC Symbol;Acc:HGNC:1664]	644	815	256	424	157	146	130	158	129	142	81	95	101	118
ENSMUSG00000009112	94044	Bcl2l13	BCL2-like 13 (apoptosis facilitator) [Source:MGI Symbol;Acc:MGI:2136959]	1375	1166	1689	1189	1353	1522	1375	1455	1771	ENSG00000073067	54905	CYP2W1	cytochrome P450 family 2 subfamily W member 1 [Source:HGNC Symbol;Acc:HGNC:20243]	1	1	2	2	3	0	2	0	5	1	2	2	0	4
ENSMUSG00000009114	76964	2610028H24Rik	RIKEN cDNA 2610028H24 gene [Source:MGI Symbol;Acc:MGI:1924214]	0	0	0	2	0	0	0	1	0	ENSG00000073111	4171	MCM2	minichromosome maintenance complex component 2 [Source:HGNC Symbol;Acc:HGNC:6944]	342	402	97	165	926	990	805	1002	467	505	441	496	353	416
ENSMUSG00000009115	76573	Spatc1l	spermatogenesis and centriole associated 1 like [Source:MGI Symbol;Acc:MGI:1923823]	1	0	0	0	0	0	3	0	0	ENSG00000073146	54456	MOV10L1	Mov10 like RISC complex RNA helicase 1 [Source:HGNC Symbol;Acc:HGNC:7201]	2	2	8	15	1	10	4	2	2	6	3	2	1	0
ENSMUSG00000009145	93838	Dqx1	DEAQ RNA-dependent ATPase [Source:MGI Symbol;Acc:MGI:2136388]	15	12	15	17	11	16	25	16	11	ENSG00000073150	56666	PANX2	pannexin 2 [Source:HGNC Symbol;Acc:HGNC:8600]	43	48	4	14	13	16	7	14	16	13	10	19	10	17
ENSMUSG00000009185	20307	Ccl8	chemokine (C-C motif) ligand 8 [Source:MGI Symbol;Acc:MGI:101878]	0	0	0	0	0	0	0	0	0	ENSG00000073169	83642	SELENOO	selenoprotein O [Source:HGNC Symbol;Acc:HGNC:30395]	59	55	68	92	66	62	69	92	75	60	57	64	62	84
ENSMUSG00000009207	69605	Lnpk	lunapark, ER junction formation factor [Source:MGI Symbol;Acc:MGI:1918115]	489	492	524	466	497	555	584	540	549	ENSG00000073282	8626	TP63	tumor protein p63 [Source:HGNC Symbol;Acc:HGNC:15979]	2	0	2	4	1	2	47	51	2	6	0	4	3	1
ENSMUSG00000009210	75573	Prr29	proline rich 29 [Source:MGI Symbol;Acc:MGI:1922823]	1	0	2	1	0	1	0	1	2	ENSG00000073331	80216	ALPK1	alpha kinase 1 [Source:HGNC Symbol;Acc:HGNC:20917]	33	57	131	195	6	1	68	90	33	31	46	33	8	5
ENSMUSG00000009214	66139	Mymk	myomaker, myoblast fusion factor [Source:MGI Symbol;Acc:MGI:1913389]	0	0	0	0	0	0	0	0	0	ENSG00000073350	3993	LLGL2	LLGL scribble cell polarity complex component 2 [Source:HGNC Symbol;Acc:HGNC:6629]	2	0	4	23	3	4	8	9	11	7	5	6	35	34
ENSMUSG00000009216	109349	Fam163b	family with sequence similarity 163, member B [Source:MGI Symbol;Acc:MGI:1926106]	4	6	7	3	3	2	7	9	7	ENSG00000073417	5151	PDE8A	phosphodiesterase 8A [Source:HGNC Symbol;Acc:HGNC:8793]	136	166	274	491	189	168	161	186	141	128	97	104	71	73
ENSMUSG00000009246	56843	Trpm5	transient receptor potential cation channel, subfamily M, member 5 [Source:MGI Symbol;Acc:MGI:1861718]	9	7	15	3	5	12	10	13	7	ENSG00000073464	1183	CLCN4	chloride voltage-gated channel 4 [Source:HGNC Symbol;Acc:HGNC:2022]	16	33	48	86	67	74	111	122	102	102	44	65	115	127
ENSMUSG00000009248	17173	Ascl2	achaete-scute family bHLH transcription factor 2 [Source:MGI Symbol;Acc:MGI:96920]	1	2	0	1	4	2	40	23	22	ENSG00000073536	54475	NLE1	notchless homolog 1 [Source:HGNC Symbol;Acc:HGNC:19889]	99	103	98	127	151	170	118	200	110	109	97	103	130	160
ENSMUSG00000009281	71660	Rarres2	retinoic acid receptor responder (tazarotene induced) 2 [Source:MGI Symbol;Acc:MGI:1918910]	12	3	12	4	9	6	4	7	10	ENSG00000073578	6389	SDHA	succinate dehydrogenase complex flavoprotein subunit A [Source:HGNC Symbol;Acc:HGNC:10680]	172	234	155	235	262	298	248	308	215	171	160	227	151	159
ENSMUSG00000009291	108705	Pttg1ip	pituitary tumor-transforming 1 interacting protein [Source:MGI Symbol;Acc:MGI:2652132]	367	287	423	330	382	442	506	356	539	ENSG00000073584	6605	SMARCE1	SWI/SNF related, matrix associated, actin dependent regulator of chromatin, subfamily e, member 1 [Source:HGNC Symbol;Acc:HGNC:11109]	706	798	388	590	1006	1139	1015	1370	922	925	728	885	768	849
ENSMUSG00000009292	28240	Trpm2	transient receptor potential cation channel, subfamily M, member 2 [Source:MGI Symbol;Acc:MGI:1351901]	5	6	8	8	0	5	13	20	23	ENSG00000073598	54752	FNDC8	fibronectin type III domain containing 8 [Source:HGNC Symbol;Acc:HGNC:25286]	0	0	0	0	0	0	1	0	0	1	0	0	0	1
ENSMUSG00000009293	22213	Ube2g2	ubiquitin-conjugating enzyme E2G 2 [Source:MGI Symbol;Acc:MGI:1343188]	270	238	399	285	307	417	198	299	392	ENSG00000073605	55876	GSDMB	gasdermin B [Source:HGNC Symbol;Acc:HGNC:23690]	33	31	36	42	31	23	39	42	63	62	35	47	96	122
ENSMUSG00000009350	17523	Mpo	myeloperoxidase [Source:MGI Symbol;Acc:MGI:97137]	18	18	11	8	8	26	0	2	0	ENSG00000073614	5927	KDM5A	lysine demethylase 5A [Source:HGNC Symbol;Acc:HGNC:9886]	645	723	535	764	828	798	818	1025	911	906	731	862	779	863
ENSMUSG00000009356	76113	Lpo	lactoperoxidase [Source:MGI Symbol;Acc:MGI:1923363]	0	1	1	0	0	1	0	0	1	ENSG00000073670	4185	ADAM11	ADAM metallopeptidase domain 11 [Source:HGNC Symbol;Acc:HGNC:189]	26	32	6	3	18	7	27	40	13	20	15	20	35	48
ENSMUSG00000009376	17295	Met	met proto-oncogene [Source:MGI Symbol;Acc:MGI:96969]	64	58	106	87	98	79	177	173	218	ENSG00000073711	5523	PPP2R3A	protein phosphatase 2 regulatory subunit B''alpha [Source:HGNC Symbol;Acc:HGNC:9307]	385	441	293	479	412	430	463	690	587	590	454	478	635	674
ENSMUSG00000009378	240638	Slc16a12	solute carrier family 16 (monocarboxylic acid transporters), member 12 [Source:MGI Symbol;Acc:MGI:2147716]	4	3	4	3	3	6	0	10	0	ENSG00000073712	10979	FERMT2	fermitin family member 2 [Source:HGNC Symbol;Acc:HGNC:15767]	566	704	908	1296	307	379	626	818	645	615	354	438	315	349
ENSMUSG00000009394	20965	Syn2	synapsin II [Source:MGI Symbol;Acc:MGI:103020]	10	8	3	17	9	10	7	15	5	ENSG00000073734	8647	ABCB11	ATP binding cassette subfamily B member 11 [Source:HGNC Symbol;Acc:HGNC:42]	5	1	1	0	2	1	1	1	3	2	5	7	1	1
ENSMUSG00000009406	13712	Elk1	ELK1, member of ETS oncogene family [Source:MGI Symbol;Acc:MGI:101833]	319	252	354	249	249	350	388	388	395	ENSG00000073737	10170	DHRS9	dehydrogenase/reductase 9 [Source:HGNC Symbol;Acc:HGNC:16888]	0	0	0	0	0	0	2	0	1	1	0	2	0	0
ENSMUSG00000009418	215690	Nav1	neuron navigator 1 [Source:MGI Symbol;Acc:MGI:2183683]	4516	3957	5259	4101	4846	5146	4201	4821	4818	ENSG00000073754	922	CD5L	CD5 molecule like [Source:HGNC Symbol;Acc:HGNC:1690]	1	0	0	1	0	0	2	0	0	2	0	0	1	0
ENSMUSG00000009470	238799	Tnpo1	transportin 1 [Source:MGI Symbol;Acc:MGI:2681523]	8627	7275	10561	7813	9461	10585	9561	9837	11271	ENSG00000073756	5743	PTGS2	prostaglandin-endoperoxide synthase 2 [Source:HGNC Symbol;Acc:HGNC:9605]	3	2	53	77	0	1	28	38	6	9	5	5	4	1
ENSMUSG00000009471	17927	Myod1	myogenic differentiation 1 [Source:MGI Symbol;Acc:MGI:97275]	0	0	1	0	0	1	0	0	3	ENSG00000073792	10644	IGF2BP2	insulin like growth factor 2 mRNA binding protein 2 [Source:HGNC Symbol;Acc:HGNC:28867]	919	1052	502	782	974	1078	1038	1420	911	946	832	1026	938	998
ENSMUSG00000009487	18419	Otog	otogelin [Source:MGI Symbol;Acc:MGI:1202064]	4	4	0	0	0	0	0	6	0	ENSG00000073803	9175	MAP3K13	mitogen-activated protein kinase kinase kinase 13 [Source:HGNC Symbol;Acc:HGNC:6852]	91	98	117	225	189	236	229	341	161	148	176	182	59	69
ENSMUSG00000009535	67897	Rnmt	RNA (guanine-7-) methyltransferase [Source:MGI Symbol;Acc:MGI:1915147]	792	677	984	778	864	1001	1121	966	1184	ENSG00000073849	6480	ST6GAL1	ST6 beta-galactoside alpha-2,6-sialyltransferase 1 [Source:HGNC Symbol;Acc:HGNC:10860]	117	156	54	95	108	92	331	478	283	301	202	212	509	587
ENSMUSG00000009545	16535	Kcnq1	potassium voltage-gated channel, subfamily Q, member 1 [Source:MGI Symbol;Acc:MGI:108083]	6	7	3	7	6	9	8	7	3	ENSG00000073861	30009	TBX21	T-box transcription factor 21 [Source:HGNC Symbol;Acc:HGNC:11599]	1	0	0	1	0	1	0	0	0	2	0	0	0	1
ENSMUSG00000009549	20813	Srp14	signal recognition particle 14 [Source:MGI Symbol;Acc:MGI:107169]	153	153	236	148	209	230	197	205	295	ENSG00000073905	.	VDAC1P1	voltage dependent anion channel 1 pseudogene 1 [Source:HGNC Symbol;Acc:HGNC:12671]	0	0	0	0	0	0	1	0	0	0	1	0	0	0
ENSMUSG00000009551	70730	6330409D20Rik	RIKEN cDNA 6330409D20 gene [Source:MGI Symbol;Acc:MGI:1917980]	13	7	6	5	9	6	13	10	8	ENSG00000073910	10129	FRY	FRY microtubule binding protein [Source:HGNC Symbol;Acc:HGNC:20367]	78	104	76	109	95	95	255	371	270	247	100	100	174	184
ENSMUSG00000009555	107951	Cdk9	cyclin-dependent kinase 9 (CDC2-related kinase) [Source:MGI Symbol;Acc:MGI:1328368]	647	573	966	624	689	873	515	725	924	ENSG00000073921	8301	PICALM	phosphatidylinositol binding clathrin assembly protein [Source:HGNC Symbol;Acc:HGNC:15514]	884	1091	1289	1870	792	915	780	1084	1093	1011	730	940	623	716
ENSMUSG00000009563	30933	Tor2a	torsin family 2, member A [Source:MGI Symbol;Acc:MGI:1353596]	172	133	178	177	173	188	172	205	235	ENSG00000073969	4905	NSF	N-ethylmaleimide sensitive factor, vesicle fusing ATPase [Source:HGNC Symbol;Acc:HGNC:8016]	336	342	297	462	345	361	332	447	301	301	204	209	208	261
ENSMUSG00000009566	14287	Fpgs	folylpolyglutamyl synthetase [Source:MGI Symbol;Acc:MGI:95576]	225	177	291	190	237	256	212	231	369	ENSG00000074047	2736	GLI2	GLI family zinc finger 2 [Source:HGNC Symbol;Acc:HGNC:4318]	521	656	625	1057	1134	1140	695	954	632	601	659	761	396	423
ENSMUSG00000009569	239719	Mrtfb	myocardin related transcription factor B [Source:MGI Symbol;Acc:MGI:3050795]	1307	1080	1440	1002	1231	1354	1277	1379	1448	ENSG00000074054	23332	CLASP1	cytoplasmic linker associated protein 1 [Source:HGNC Symbol;Acc:HGNC:17088]	1203	1338	665	1063	1519	1654	1540	2047	1592	1665	1338	1565	1243	1442
ENSMUSG00000009575	12419	Cbx5	chromobox 5 [Source:MGI Symbol;Acc:MGI:109372]	12759	11078	15599	11454	12871	15466	16023	15910	17251	ENSG00000074071	65993	MRPS34	mitochondrial ribosomal protein S34 [Source:HGNC Symbol;Acc:HGNC:16618]	24	39	27	37	44	35	25	52	32	37	25	30	23	32
ENSMUSG00000009580	69592	Odam	odontogenic, ameloblast asssociated [Source:MGI Symbol;Acc:MGI:1916842]	0	1	0	0	0	0	0	0	0	ENSG00000074181	4854	NOTCH3	notch receptor 3 [Source:HGNC Symbol;Acc:HGNC:7883]	2577	3181	2286	3493	3146	3125	5229	7064	4050	4001	3327	3975	3487	3913
ENSMUSG00000009585	80287	Apobec3	apolipoprotein B mRNA editing enzyme, catalytic polypeptide 3 [Source:MGI Symbol;Acc:MGI:1933111]	78	58	84	77	79	70	46	59	63	ENSG00000074201	1207	CLNS1A	chloride nucleotide-sensitive channel 1A [Source:HGNC Symbol;Acc:HGNC:2080]	290	323	148	261	396	463	379	465	336	295	322	351	313	358
ENSMUSG00000009588	20445	St6galnac1	ST6 (alpha-N-acetyl-neuraminyl-2,3-beta-galactosyl-1,3)-N-acetylgalactosaminide alpha-2,6-sialyltransferase 1 [Source:MGI Symbol;Acc:MGI:1341826]	0	1	0	0	0	0	1	0	0	ENSG00000074211	5522	PPP2R2C	protein phosphatase 2 regulatory subunit Bgamma [Source:HGNC Symbol;Acc:HGNC:9306]	42	46	1	3	0	4	10	4	57	44	1	3	14	15
ENSMUSG00000009596	74469	Taf7l	TATA-box binding protein associated factor 7 like [Source:MGI Symbol;Acc:MGI:1921719]	0	0	0	0	2	0	0	0	0	ENSG00000074219	8463	TEAD2	TEA domain transcription factor 2 [Source:HGNC Symbol;Acc:HGNC:11715]	674	846	571	876	958	1073	1234	1779	1102	1064	938	1018	911	1070
ENSMUSG00000009614	192166	Sardh	sarcosine dehydrogenase [Source:MGI Symbol;Acc:MGI:2183102]	5	2	7	3	5	2	9	5	6	ENSG00000074266	8726	EED	embryonic ectoderm development [Source:HGNC Symbol;Acc:HGNC:3188]	80	95	44	64	128	123	115	109	93	90	83	89	78	87
ENSMUSG00000009621	22325	Vav2	vav 2 oncogene [Source:MGI Symbol;Acc:MGI:102718]	702	537	757	588	660	736	642	760	730	ENSG00000074276	54825	CDHR2	cadherin related family member 2 [Source:HGNC Symbol;Acc:HGNC:18231]	3	0	1	0	2	6	3	9	4	4	8	5	2	5
ENSMUSG00000009628	104271	Tex15	testis expressed gene 15 [Source:MGI Symbol;Acc:MGI:1934816]	289	270	371	223	337	418	269	430	347	ENSG00000074317	6620	SNCB	synuclein beta [Source:HGNC Symbol;Acc:HGNC:11140]	3	1	1	1	0	0	1	0	7	3	0	0	1	1
ENSMUSG00000009630	19053	Ppp2cb	protein phosphatase 2 (formerly 2A), catalytic subunit, beta isoform [Source:MGI Symbol;Acc:MGI:1321161]	634	698	982	675	801	981	771	785	981	ENSG00000074319	7251	TSG101	tumor susceptibility 101 [Source:HGNC Symbol;Acc:HGNC:15971]	272	313	254	368	290	310	314	401	279	304	241	266	203	219
ENSMUSG00000009633	14373	G0s2	G0/G1 switch gene 2 [Source:MGI Symbol;Acc:MGI:1316737]	8	5	8	6	2	2	28	10	10	ENSG00000074356	55421	NCBP3	nuclear cap binding subunit 3 [Source:HGNC Symbol;Acc:HGNC:24612]	561	715	464	683	643	726	736	956	764	736	548	647	598	783
ENSMUSG00000009640	66233	Dmap1	DNA methyltransferase 1-associated protein 1 [Source:MGI Symbol;Acc:MGI:1913483]	252	231	383	286	331	385	320	301	433	ENSG00000074370	489	ATP2A3	ATPase sarcoplasmic/endoplasmic reticulum Ca2+ transporting 3 [Source:HGNC Symbol;Acc:HGNC:813]	3	3	10	10	0	3	16	20	17	8	8	9	38	39
ENSMUSG00000009646	69836	Pla2g12b	phospholipase A2, group XIIB [Source:MGI Symbol;Acc:MGI:1917086]	0	0	3	0	0	4	0	0	0	ENSG00000074410	771	CA12	carbonic anhydrase 12 [Source:HGNC Symbol;Acc:HGNC:1371]	372	440	6	8	17	11	73	124	135	121	15	5	6	6
ENSMUSG00000009647	215999	Mcu	mitochondrial calcium uniporter [Source:MGI Symbol;Acc:MGI:3026965]	283	239	367	277	356	412	368	400	385	ENSG00000074416	11343	MGLL	monoglyceride lipase [Source:HGNC Symbol;Acc:HGNC:17038]	28	25	327	573	3	1	41	26	62	65	16	9	9	13
ENSMUSG00000009654	18302	Oit3	oncoprotein induced transcript 3 [Source:MGI Symbol;Acc:MGI:1201782]	9	3	14	4	16	8	34	19	32	ENSG00000074527	59277	NTN4	netrin 4 [Source:HGNC Symbol;Acc:HGNC:13658]	19	12	155	241	19	21	96	152	165	179	82	84	44	32
ENSMUSG00000009670	83558	Tex11	testis expressed gene 11 [Source:MGI Symbol;Acc:MGI:1933237]	1	0	0	0	0	0	0	0	0	ENSG00000074582	617	BCS1L	BCS1 homolog, ubiquinol-cytochrome c reductase complex chaperone [Source:HGNC Symbol;Acc:HGNC:1020]	77	78	43	74	87	111	114	156	53	65	49	70	64	85
ENSMUSG00000009681	110279	Bcr	breakpoint cluster region [Source:MGI Symbol;Acc:MGI:88141]	1175	1041	1382	998	1142	1553	1019	1209	1413	ENSG00000074590	9891	NUAK1	NUAK family kinase 1 [Source:HGNC Symbol;Acc:HGNC:14311]	220	259	254	408	488	502	318	425	535	519	522	588	407	454
ENSMUSG00000009687	18301	Fxyd5	FXYD domain-containing ion transport regulator 5 [Source:MGI Symbol;Acc:MGI:1201785]	17	21	20	11	16	22	19	37	28	ENSG00000074603	54878	DPP8	dipeptidyl peptidase 8 [Source:HGNC Symbol;Acc:HGNC:16490]	307	330	282	423	357	399	333	405	324	308	247	287	285	323
ENSMUSG00000009731	16506	Kcnd1	potassium voltage-gated channel, Shal-related family, member 1 [Source:MGI Symbol;Acc:MGI:96671]	18	23	23	19	28	35	64	57	55	ENSG00000074621	9187	SLC24A1	solute carrier family 24 member 1 [Source:HGNC Symbol;Acc:HGNC:10975]	96	101	96	140	101	94	63	75	62	61	84	68	47	51
ENSMUSG00000009733	21422	Tfcp2	transcription factor CP2 [Source:MGI Symbol;Acc:MGI:98509]	263	260	306	227	191	319	350	295	305	ENSG00000074657	55205	ZNF532	zinc finger protein 532 [Source:HGNC Symbol;Acc:HGNC:30940]	1879	2284	1251	2023	2341	2582	2192	3112	2236	2186	1953	2191	1762	2097
ENSMUSG00000009734	218030	Pou6f2	POU domain, class 6, transcription factor 2 [Source:MGI Symbol;Acc:MGI:2443631]	18	13	12	6	15	10	9	14	4	ENSG00000074660	8578	SCARF1	scavenger receptor class F member 1 [Source:HGNC Symbol;Acc:HGNC:16820]	3	3	3	12	15	7	2	6	15	18	9	13	4	11
ENSMUSG00000009739	19009	Pou6f1	POU domain, class 6, transcription factor 1 [Source:MGI Symbol;Acc:MGI:102935]	48	28	44	33	35	37	37	11	24	ENSG00000074695	3998	LMAN1	lectin, mannose binding 1 [Source:HGNC Symbol;Acc:HGNC:6631]	541	691	1762	2711	556	712	964	1234	924	894	569	651	645	720
ENSMUSG00000009741	22221	Ubp1	upstream binding protein 1 [Source:MGI Symbol;Acc:MGI:104889]	1753	1536	2046	1624	1702	2040	1881	2094	2168	ENSG00000074696	51495	HACD3	3-hydroxyacyl-CoA dehydratase 3 [Source:HGNC Symbol;Acc:HGNC:24175]	928	1090	523	817	1318	1434	1100	1363	1295	1215	939	1083	1029	1108
ENSMUSG00000009772	74137	Nuak2	NUAK family, SNF1-like kinase, 2 [Source:MGI Symbol;Acc:MGI:1921387]	483	373	626	461	554	610	647	609	735	ENSG00000074706	26034	IPCEF1	interaction protein for cytohesin exchange factors 1 [Source:HGNC Symbol;Acc:HGNC:21204]	7	17	0	2	3	4	6	1	16	16	3	2	7	8
ENSMUSG00000009828	56542	Ick	intestinal cell kinase [Source:MGI Symbol;Acc:MGI:1934157]	1142	958	1392	907	1012	1415	818	1152	1133	ENSG00000074755	23140	ZZEF1	zinc finger ZZ-type and EF-hand domain containing 1 [Source:HGNC Symbol;Acc:HGNC:29027]	466	573	461	714	504	559	502	683	498	508	358	400	338	371
ENSMUSG00000009863	67680	Sdhb	succinate dehydrogenase complex, subunit B, iron sulfur (Ip) [Source:MGI Symbol;Acc:MGI:1914930]	847	719	1025	790	998	1035	809	924	1145	ENSG00000074771	50508	NOX3	NADPH oxidase 3 [Source:HGNC Symbol;Acc:HGNC:7890]	0	0	0	0	0	0	0	0	0	0	0	0	0	0
ENSMUSG00000009876	84682	Cox4i2	cytochrome c oxidase subunit 4I2 [Source:MGI Symbol;Acc:MGI:2135755]	4	3	7	6	1	1	49	17	21	ENSG00000074800	2023	ENO1	enolase 1 [Source:HGNC Symbol;Acc:HGNC:3350]	3356	3922	2888	4491	4276	4697	4342	5699	2592	2571	1914	2179	2497	2725
ENSMUSG00000009894	67826	Snap47	synaptosomal-associated protein, 47 [Source:MGI Symbol;Acc:MGI:1915076]	415	383	544	405	442	586	631	528	560	ENSG00000074803	6557	SLC12A1	solute carrier family 12 member 1 [Source:HGNC Symbol;Acc:HGNC:10910]	4	4	14	11	4	1	15	26	11	5	6	4	7	10
ENSMUSG00000009900	22416	Wnt3a	wingless-type MMTV integration site family, member 3A [Source:MGI Symbol;Acc:MGI:98956]	13	13	17	6	25	9	30	22	63	ENSG00000074842	56005	MYDGF	myeloid derived growth factor [Source:HGNC Symbol;Acc:HGNC:16948]	39	33	60	102	24	38	40	43	33	29	29	32	32	27
ENSMUSG00000009905	70750	Kdsr	3-ketodihydrosphingosine reductase [Source:MGI Symbol;Acc:MGI:1918000]	218	177	242	174	214	246	369	298	329	ENSG00000074855	57719	ANO8	anoctamin 8 [Source:HGNC Symbol;Acc:HGNC:29329]	116	136	77	85	138	119	147	187	160	158	149	158	144	158
ENSMUSG00000009907	20479	Vps4b	vacuolar protein sorting 4B [Source:MGI Symbol;Acc:MGI:1100499]	860	687	967	804	851	932	980	969	1017	ENSG00000074935	51175	TUBE1	tubulin epsilon 1 [Source:HGNC Symbol;Acc:HGNC:20775]	113	131	125	229	187	193	168	262	162	154	178	206	130	138
ENSMUSG00000009927	75617	Rps25	ribosomal protein S25 [Source:MGI Symbol;Acc:MGI:1922867]	4111	3453	6018	4047	4725	5833	5062	5446	6591	ENSG00000074964	55160	ARHGEF10L	Rho guanine nucleotide exchange factor 10 like [Source:HGNC Symbol;Acc:HGNC:25540]	184	218	115	208	376	370	253	358	231	219	241	272	337	406
ENSMUSG00000009941	83454	Nxf2	nuclear RNA export factor 2 [Source:MGI Symbol;Acc:MGI:1933192]	1	0	3	1	0	1	6	3	5	ENSG00000074966	7294	TXK	TXK tyrosine kinase [Source:HGNC Symbol;Acc:HGNC:12434]	1	2	1	1	0	0	0	0	0	1	1	0	1	0
ENSMUSG00000009995	66826	Taz	tafazzin [Source:MGI Symbol;Acc:MGI:109626]	183	176	186	184	164	195	268	209	255	ENSG00000075035	9671	WSCD2	WSC domain containing 2 [Source:HGNC Symbol;Acc:HGNC:29117]	43	57	63	119	24	22	106	137	135	146	26	21	32	29
ENSMUSG00000010021	286942	Kif19a	kinesin family member 19A [Source:MGI Symbol;Acc:MGI:2447024]	19	22	37	1	5	22	23	6	8	ENSG00000075043	3785	KCNQ2	potassium voltage-gated channel subfamily Q member 2 [Source:HGNC Symbol;Acc:HGNC:6296]	283	307	2	5	472	529	326	392	476	412	304	382	396	418
ENSMUSG00000010025	11671	Aldh3a2	aldehyde dehydrogenase family 3, subfamily A2 [Source:MGI Symbol;Acc:MGI:1353452]	156	172	230	158	161	176	282	228	220	ENSG00000075073	6865	TACR2	tachykinin receptor 2 [Source:HGNC Symbol;Acc:HGNC:11527]	6	11	0	6	13	9	3	6	5	6	2	5	4	2
ENSMUSG00000010044	114602	Zmynd10	zinc finger, MYND domain containing 10 [Source:MGI Symbol;Acc:MGI:2387863]	6	3	2	4	2	0	2	1	6	ENSG00000075089	64431	ACTR6	actin related protein 6 [Source:HGNC Symbol;Acc:HGNC:24025]	37	49	30	33	63	69	64	83	54	52	41	46	67	71
ENSMUSG00000010045	56395	Tmem115	transmembrane protein 115 [Source:MGI Symbol;Acc:MGI:1930765]	211	159	255	181	223	263	202	218	247	ENSG00000075131	54962	TIPIN	TIMELESS interacting protein [Source:HGNC Symbol;Acc:HGNC:30750]	26	40	17	19	41	56	45	43	38	43	18	31	30	26
ENSMUSG00000010047	15587	Hyal2	hyaluronoglucosaminidase 2 [Source:MGI Symbol;Acc:MGI:1196334]	595	486	787	582	644	788	506	670	758	ENSG00000075142	6717	SRI	sorcin [Source:HGNC Symbol;Acc:HGNC:11292]	319	358	183	306	483	521	354	467	312	263	324	337	266	252
ENSMUSG00000010048	15983	Ifrd2	interferon-related developmental regulator 2 [Source:MGI Symbol;Acc:MGI:1316708]	289	250	458	351	335	423	400	485	591	ENSG00000075151	8672	EIF4G3	eukaryotic translation initiation factor 4 gamma 3 [Source:HGNC Symbol;Acc:HGNC:3298]	1286	1463	1002	1550	1811	2004	1536	2176	1682	1693	1317	1619	1794	2095
ENSMUSG00000010051	15586	Hyal1	hyaluronoglucosaminidase 1 [Source:MGI Symbol;Acc:MGI:96298]	99	82	80	76	65	75	143	134	96	ENSG00000075188	79023	NUP37	nucleoporin 37 [Source:HGNC Symbol;Acc:HGNC:29929]	94	115	51	92	113	121	112	173	88	95	72	84	87	121
ENSMUSG00000010054	80385	Tusc2	tumor suppressor 2, mitochondrial calcium regulator [Source:MGI Symbol;Acc:MGI:1931086]	184	170	285	173	259	305	157	209	321	ENSG00000075213	10371	SEMA3A	semaphorin 3A [Source:HGNC Symbol;Acc:HGNC:10723]	508	504	875	1286	617	657	819	1047	1161	1084	976	1116	710	770
ENSMUSG00000010057	56032	Nprl2	NPR2 like, GATOR1 complex subunit [Source:MGI Symbol;Acc:MGI:1914482]	100	112	153	89	102	133	162	158	168	ENSG00000075218	51512	GTSE1	G2 and S-phase expressed 1 [Source:HGNC Symbol;Acc:HGNC:13698]	287	310	89	135	321	319	226	359	287	316	232	277	237	273
ENSMUSG00000010064	76257	Slc38a3	solute carrier family 38, member 3 [Source:MGI Symbol;Acc:MGI:1923507]	144	88	138	137	121	135	466	282	191	ENSG00000075223	10512	SEMA3C	semaphorin 3C [Source:HGNC Symbol;Acc:HGNC:10725]	1384	1618	320	414	78	70	366	443	806	825	469	628	287	313
ENSMUSG00000010066	56808	Cacna2d2	calcium channel, voltage-dependent, alpha 2/delta subunit 2 [Source:MGI Symbol;Acc:MGI:1929813]	285	202	302	232	287	318	322	265	230	ENSG00000075234	55020	TTC38	tetratricopeptide repeat domain 38 [Source:HGNC Symbol;Acc:HGNC:26082]	126	160	62	126	136	136	145	172	121	119	123	127	142	168
ENSMUSG00000010067	56289	Rassf1	Ras association (RalGDS/AF-6) domain family member 1 [Source:MGI Symbol;Acc:MGI:1928386]	248	191	301	195	260	323	397	333	268	ENSG00000075239	38	ACAT1	acetyl-CoA acetyltransferase 1 [Source:HGNC Symbol;Acc:HGNC:93]	101	109	55	99	99	89	92	120	99	80	56	73	63	59
ENSMUSG00000010080	71889	Epn3	epsin 3 [Source:MGI Symbol;Acc:MGI:1919139]	53	40	53	48	46	47	46	59	51	ENSG00000075240	23151	GRAMD4	GRAM domain containing 4 [Source:HGNC Symbol;Acc:HGNC:29113]	98	121	85	122	122	114	99	150	130	139	128	127	118	141
ENSMUSG00000010086	22671	Rnf112	ring finger protein 112 [Source:MGI Symbol;Acc:MGI:106611]	0	4	10	0	1	0	1	1	0	ENSG00000075275	9620	CELSR1	cadherin EGF LAG seven-pass G-type receptor 1 [Source:HGNC Symbol;Acc:HGNC:1850]	365	453	57	56	824	777	629	844	716	684	854	986	911	1069
ENSMUSG00000010095	17254	Slc3a2	solute carrier family 3 (activators of dibasic and neutral amino acid transport), member 2 [Source:MGI Symbol;Acc:MGI:96955]	630	566	942	738	771	847	1791	1177	1549	ENSG00000075290	7479	WNT8B	Wnt family member 8B [Source:HGNC Symbol;Acc:HGNC:12789]	3	1	3	1	7	6	5	10	3	5	5	5	6	6
ENSMUSG00000010097	53319	Nxf1	nuclear RNA export factor 1 [Source:MGI Symbol;Acc:MGI:1858330]	1802	1521	2104	1587	1642	2197	1773	1973	2127	ENSG00000075292	27332	ZNF638	zinc finger protein 638 [Source:HGNC Symbol;Acc:HGNC:17894]	877	992	529	879	1306	1436	1217	1504	1267	1295	1055	1202	1422	1542
ENSMUSG00000010110	56389	Stx5a	syntaxin 5A [Source:MGI Symbol;Acc:MGI:1928483]	462	374	521	389	382	459	456	412	442	ENSG00000075303	55972	SLC25A40	solute carrier family 25 member 40 [Source:HGNC Symbol;Acc:HGNC:29680]	149	150	61	81	166	197	163	197	150	123	105	133	105	129
ENSMUSG00000010122	67473	Slc47a1	solute carrier family 47, member 1 [Source:MGI Symbol;Acc:MGI:1914723]	1	1	0	1	4	3	2	1	0	ENSG00000075336	29090	TIMM21	translocase of inner mitochondrial membrane 21 [Source:HGNC Symbol;Acc:HGNC:25010]	97	93	53	64	91	88	64	124	50	48	41	47	55	54
ENSMUSG00000010136	100503311	Pifo	primary cilia formation [Source:MGI Symbol;Acc:MGI:1923670]	6	4	7	8	9	12	11	3	1	ENSG00000075340	119	ADD2	adducin 2 [Source:HGNC Symbol;Acc:HGNC:244]	70	94	1	5	482	474	437	554	597	650	325	420	800	849
ENSMUSG00000010142	57916	Tnfrsf13b	tumor necrosis factor receptor superfamily, member 13b [Source:MGI Symbol;Acc:MGI:1889411]	8	11	17	8	10	13	6	10	6	ENSG00000075388	2249	FGF4	fibroblast growth factor 4 [Source:HGNC Symbol;Acc:HGNC:3682]	0	0	0	0	1	0	4	6	0	0	3	0	3	1
ENSMUSG00000010154	234857	Spire2	spire type actin nucleation factor 2 [Source:MGI Symbol;Acc:MGI:2446256]	62	59	74	48	81	116	105	82	103	ENSG00000075391	9462	RASAL2	RAS protein activator like 2 [Source:HGNC Symbol;Acc:HGNC:9874]	614	792	501	825	850	923	722	999	1157	1034	1059	1181	1294	1441
ENSMUSG00000010175	19130	Prox1	prospero homeobox 1 [Source:MGI Symbol;Acc:MGI:97772]	186	107	159	116	117	149	189	186	215	ENSG00000075399	9605	VPS9D1	VPS9 domain containing 1 [Source:HGNC Symbol;Acc:HGNC:13526]	80	80	75	118	60	69	56	95	99	77	57	84	54	50
ENSMUSG00000010205	71766	Raver1	ribonucleoprotein, PTB-binding 1 [Source:MGI Symbol;Acc:MGI:1919016]	1891	1544	2450	1558	1820	2387	1689	2110	2182	ENSG00000075407	7587	ZNF37A	zinc finger protein 37A [Source:HGNC Symbol;Acc:HGNC:13102]	187	201	174	273	224	259	297	366	347	332	297	325	354	321
ENSMUSG00000010277	72503	2610507B11Rik	RIKEN cDNA 2610507B11 gene [Source:MGI Symbol;Acc:MGI:1919753]	3852	3283	5122	3927	4225	4979	3861	4386	4969	ENSG00000075413	4140	MARK3	microtubule affinity regulating kinase 3 [Source:HGNC Symbol;Acc:HGNC:6897]	416	522	284	509	587	568	452	646	524	486	417	480	351	378
ENSMUSG00000010290	98404	AI597479	expressed sequence AI597479 [Source:MGI Symbol;Acc:MGI:2138299]	475	382	554	418	474	621	529	592	700	ENSG00000075415	5250	SLC25A3	solute carrier family 25 member 3 [Source:HGNC Symbol;Acc:HGNC:10989]	1729	1962	1564	2661	1805	2007	2080	2855	2008	1954	1585	1800	1474	1573
ENSMUSG00000010307	67893	Tmem86a	transmembrane protein 86A [Source:MGI Symbol;Acc:MGI:1915143]	32	32	33	19	27	32	63	28	33	ENSG00000075420	64778	FNDC3B	fibronectin type III domain containing 3B [Source:HGNC Symbol;Acc:HGNC:24670]	1131	1267	2575	4112	934	1021	1260	1765	1553	1415	1134	1200	796	923
ENSMUSG00000010311	269120	Optc	opticin [Source:MGI Symbol;Acc:MGI:2151113]	15	20	12	22	23	24	0	13	10	ENSG00000075426	2355	FOSL2	FOS like 2, AP-1 transcription factor subunit [Source:HGNC Symbol;Acc:HGNC:3798]	90	128	635	1000	78	68	218	301	314	283	226	228	87	96
ENSMUSG00000010342	83560	Tex14	testis expressed gene 14 [Source:MGI Symbol;Acc:MGI:1933227]	0	3	0	0	2	0	1	3	1	ENSG00000075429	27091	CACNG5	calcium voltage-gated channel auxiliary subunit gamma 5 [Source:HGNC Symbol;Acc:HGNC:1409]	174	211	2	3	2	2	11	13	11	4	5	7	2	5
ENSMUSG00000010358	70110	Ifi35	interferon-induced protein 35 [Source:MGI Symbol;Acc:MGI:1917360]	5	6	7	7	11	8	2	9	4	ENSG00000075461	27092	CACNG4	calcium voltage-gated channel auxiliary subunit gamma 4 [Source:HGNC Symbol;Acc:HGNC:1408]	402	491	22	30	311	291	422	583	356	356	287	288	196	202
ENSMUSG00000010362	66599	Rdm1	RAD52 motif 1 [Source:MGI Symbol;Acc:MGI:1913849]	38	30	61	42	28	59	110	52	61	ENSG00000075539	285527	FRYL	FRY like transcription coactivator [Source:HGNC Symbol;Acc:HGNC:29127]	835	928	546	830	1155	1262	1003	1254	1098	1140	877	1124	913	1003
ENSMUSG00000010376	18002	Nedd8	neural precursor cell expressed, developmentally down-regulated gene 8 [Source:MGI Symbol;Acc:MGI:97301]	550	488	759	524	600	803	511	586	776	ENSG00000075568	23505	TMEM131	transmembrane protein 131 [Source:HGNC Symbol;Acc:HGNC:30366]	1258	1467	672	1047	987	1113	1050	1400	882	837	680	809	643	734
ENSMUSG00000010392	53334	Gosr1	golgi SNAP receptor complex member 1 [Source:MGI Symbol;Acc:MGI:1858260]	367	288	446	345	407	442	378	374	484	ENSG00000075618	6624	FSCN1	fascin actin-bundling protein 1 [Source:HGNC Symbol;Acc:HGNC:11148]	1164	1432	1712	2846	1157	1129	2190	2777	1858	1837	1211	1437	1032	1207
ENSMUSG00000010406	68836	Mrpl52	mitochondrial ribosomal protein L52 [Source:MGI Symbol;Acc:MGI:1916086]	290	228	405	228	253	423	264	412	428	ENSG00000075624	60	ACTB	actin beta [Source:HGNC Symbol;Acc:HGNC:132]	28247	33317	36028	54485	31871	33487	28879	46484	32105	31738	23829	26858	18208	20609
ENSMUSG00000010435	78634	Spaca7	sperm acrosome associated 7 [Source:MGI Symbol;Acc:MGI:1925884]	0	0	0	0	0	0	0	0	0	ENSG00000075643	55034	MOCOS	molybdenum cofactor sulfurase [Source:HGNC Symbol;Acc:HGNC:18234]	10	14	20	27	3	4	12	12	12	8	2	4	9	9
ENSMUSG00000010453	226976	Kansl3	KAT8 regulatory NSL complex subunit 3 [Source:MGI Symbol;Acc:MGI:1918055]	746	610	719	554	585	722	723	846	765	ENSG00000075651	5337	PLD1	phospholipase D1 [Source:HGNC Symbol;Acc:HGNC:9067]	147	168	77	135	33	38	319	415	71	68	55	42	14	8
ENSMUSG00000010461	14051	Eya4	EYA transcriptional coactivator and phosphatase 4 [Source:MGI Symbol;Acc:MGI:1337104]	316	286	382	256	295	385	349	360	317	ENSG00000075673	479	ATP12A	ATPase H+/K+ transporting non-gastric alpha2 subunit [Source:HGNC Symbol;Acc:HGNC:13816]	0	0	0	0	0	0	0	0	1	4	1	1	2	1
ENSMUSG00000010476	13593	Ebf3	early B cell factor 3 [Source:MGI Symbol;Acc:MGI:894289]	484	452	432	342	373	532	624	645	569	ENSG00000075702	284403	WDR62	WD repeat domain 62 [Source:HGNC Symbol;Acc:HGNC:24502]	245	281	46	73	313	297	264	384	225	240	160	184	136	166
ENSMUSG00000010492	.	Uckl1os	uridine-cytidine kinase 1-like 1, opposite strand [Source:MGI Symbol;Acc:MGI:3801877]	25	22	33	22	17	18	10	28	23	ENSG00000075711	1739	DLG1	discs large MAGUK scaffold protein 1 [Source:HGNC Symbol;Acc:HGNC:2900]	590	718	639	1031	689	719	693	854	817	834	496	587	572	642
ENSMUSG00000010505	17932	Myt1	myelin transcription factor 1 [Source:MGI Symbol;Acc:MGI:1100535]	34	39	21	15	9	26	3	18	9	ENSG00000075785	7879	RAB7A	RAB7A, member RAS oncogene family [Source:HGNC Symbol;Acc:HGNC:9788]	771	841	569	865	672	723	618	925	635	585	472	527	325	416
ENSMUSG00000010517	14084	Faf1	Fas-associated factor 1 [Source:MGI Symbol;Acc:MGI:109419]	789	730	1095	768	914	954	1208	1145	1223	ENSG00000075790	55973	BCAP29	B cell receptor associated protein 29 [Source:HGNC Symbol;Acc:HGNC:24131]	155	165	194	334	212	208	227	273	197	152	130	115	140	163
ENSMUSG00000010529	212539	Gm266	predicted gene 266 [Source:MGI Symbol;Acc:MGI:2685112]	18	29	33	28	25	27	37	46	29	ENSG00000075826	25956	SEC31B	SEC31 homolog B, COPII coat complex component [Source:HGNC Symbol;Acc:HGNC:23197]	111	125	96	149	183	190	134	233	183	162	198	248	189	238
ENSMUSG00000010538	76927	Tsacc	TSSK6 activating co-chaperone [Source:MGI Symbol;Acc:MGI:1924177]	21	13	18	18	14	12	18	18	28	ENSG00000075856	9733	SART3	spliceosome associated factor 3, U4/U6 recycling protein [Source:HGNC Symbol;Acc:HGNC:16860]	433	466	239	374	463	531	474	646	460	430	366	447	384	440
ENSMUSG00000010554	67493	Mettl16	methyltransferase like 16 [Source:MGI Symbol;Acc:MGI:1914743]	957	868	1387	1040	1166	1264	1165	1209	1482	ENSG00000075884	55843	ARHGAP15	Rho GTPase activating protein 15 [Source:HGNC Symbol;Acc:HGNC:21030]	4	4	0	1	3	2	9	7	5	3	1	1	1	3
ENSMUSG00000010592	13164	Dazl	deleted in azoospermia-like [Source:MGI Symbol;Acc:MGI:1342328]	2	0	0	0	5	0	5	6	0	ENSG00000075886	113457	TUBA3D	tubulin alpha 3d [Source:HGNC Symbol;Acc:HGNC:24071]	1	2	1	2	4	3	7	8	4	5	1	5	3	3
ENSMUSG00000010601	75761	Apol7a	apolipoprotein L 7a [Source:MGI Symbol;Acc:MGI:1923011]	0	0	0	0	3	0	0	0	0	ENSG00000075891	5076	PAX2	paired box 2 [Source:HGNC Symbol;Acc:HGNC:8616]	3	2	1	2	2	0	51	61	10	4	3	0	3	3
ENSMUSG00000010607	66268	Pigyl	phosphatidylinositol glycan anchor biosynthesis, class Y-like [Source:MGI Symbol;Acc:MGI:1913518]	32	34	48	27	24	31	20	35	36	ENSG00000075914	23016	EXOSC7	exosome component 7 [Source:HGNC Symbol;Acc:HGNC:28112]	57	74	42	70	75	97	87	109	79	69	60	69	99	99
ENSMUSG00000010608	67039	Rbm25	RNA binding motif protein 25 [Source:MGI Symbol;Acc:MGI:1914289]	3549	3098	3837	3369	3474	3840	4353	4209	4129	ENSG00000075945	22920	KIFAP3	kinesin associated protein 3 [Source:HGNC Symbol;Acc:HGNC:17060]	252	294	205	348	127	146	239	292	261	240	114	139	119	132
ENSMUSG00000010609	19165	Psen2	presenilin 2 [Source:MGI Symbol;Acc:MGI:109284]	62	50	101	60	59	53	67	77	50	ENSG00000075975	23609	MKRN2	makorin ring finger protein 2 [Source:HGNC Symbol;Acc:HGNC:7113]	164	206	171	287	219	241	276	380	258	247	276	268	198	233
ENSMUSG00000010651	235674	Acaa1b	acetyl-Coenzyme A acyltransferase 1B [Source:MGI Symbol;Acc:MGI:3605455]	8	8	9	4	9	2	3	6	2	ENSG00000076003	4175	MCM6	minichromosome maintenance complex component 6 [Source:HGNC Symbol;Acc:HGNC:6949]	789	981	206	301	866	959	788	892	608	584	424	524	423	539
ENSMUSG00000010660	18799	Plcd1	phospholipase C, delta 1 [Source:MGI Symbol;Acc:MGI:97614]	126	87	161	110	128	150	209	129	169	ENSG00000076043	25996	REXO2	RNA exonuclease 2 [Source:HGNC Symbol;Acc:HGNC:17851]	68	69	134	272	65	72	76	91	65	72	45	53	45	56
ENSMUSG00000010663	76267	Fads1	fatty acid desaturase 1 [Source:MGI Symbol;Acc:MGI:1923517]	2371	2013	2824	1941	2302	2916	3088	2458	2761	ENSG00000076053	10179	RBM7	RNA binding motif protein 7 [Source:HGNC Symbol;Acc:HGNC:9904]	86	117	216	354	159	184	134	218	201	150	160	155	189	211
ENSMUSG00000010721	56873	Lmbr1	limb region 1 [Source:MGI Symbol;Acc:MGI:1861746]	113	93	123	69	95	138	121	118	108	ENSG00000076067	5939	RBMS2	RNA binding motif single stranded interacting protein 2 [Source:HGNC Symbol;Acc:HGNC:9909]	283	378	866	1435	442	408	476	684	509	514	431	488	294	360
ENSMUSG00000010751	79202	Tnfrsf22	tumor necrosis factor receptor superfamily, member 22 [Source:MGI Symbol;Acc:MGI:1930270]	174	123	194	154	157	182	165	143	167	ENSG00000076108	11176	BAZ2A	bromodomain adjacent to zinc finger domain 2A [Source:HGNC Symbol;Acc:HGNC:962]	819	1007	804	1157	1392	1408	1113	1535	1265	1269	1159	1306	1572	1853
ENSMUSG00000010755	27267	Cars	cysteinyl-tRNA synthetase [Source:MGI Symbol;Acc:MGI:1351477]	685	584	892	605	791	900	1752	1135	1339	ENSG00000076201	25930	PTPN23	protein tyrosine phosphatase non-receptor type 23 [Source:HGNC Symbol;Acc:HGNC:14406]	663	721	435	734	616	633	620	930	631	637	494	528	460	562
ENSMUSG00000010760	22113	Phlda2	pleckstrin homology like domain, family A, member 2 [Source:MGI Symbol;Acc:MGI:1202307]	5	1	7	5	9	8	8	3	8	ENSG00000076242	4292	MLH1	mutL homolog 1 [Source:HGNC Symbol;Acc:HGNC:7127]	354	435	198	291	364	451	405	464	286	290	242	282	149	219
ENSMUSG00000010796	74068	Asz1	ankyrin repeat, SAM and basic leucine zipper domain containing 1 [Source:MGI Symbol;Acc:MGI:1921318]	0	0	0	0	0	0	0	0	0	ENSG00000076248	7374	UNG	uracil DNA glycosylase [Source:HGNC Symbol;Acc:HGNC:12572]	184	215	73	117	255	228	214	273	214	193	163	158	171	205
ENSMUSG00000010797	22413	Wnt2	wingless-type MMTV integration site family, member 2 [Source:MGI Symbol;Acc:MGI:98954]	1	3	2	2	3	3	1	4	1	ENSG00000076258	2329	FMO4	flavin containing dimethylaniline monoxygenase 4 [Source:HGNC Symbol;Acc:HGNC:3772]	2	5	17	30	1	0	1	1	7	11	2	2	11	6
ENSMUSG00000010803	14394	Gabra1	gamma-aminobutyric acid (GABA) A receptor, subunit alpha 1 [Source:MGI Symbol;Acc:MGI:95613]	2	9	6	6	9	2	13	11	3	ENSG00000076321	27252	KLHL20	kelch like family member 20 [Source:HGNC Symbol;Acc:HGNC:25056]	103	142	134	200	146	136	136	216	518	499	107	154	152	175
ENSMUSG00000010825	170935	Grid2ip	glutamate receptor, ionotropic, delta 2 (Grid2) interacting protein 1 [Source:MGI Symbol;Acc:MGI:2176213]	6	9	4	0	8	2	0	4	0	ENSG00000076344	8786	RGS11	regulator of G protein signaling 11 [Source:HGNC Symbol;Acc:HGNC:9993]	7	10	2	4	3	1	6	9	14	14	8	4	17	23
ENSMUSG00000010830	105785	Kdelr3	KDEL (Lys-Asp-Glu-Leu) endoplasmic reticulum protein retention receptor 3 [Source:MGI Symbol;Acc:MGI:2145953]	27	24	64	28	52	27	71	48	34	ENSG00000076351	113235	SLC46A1	solute carrier family 46 member 1 [Source:HGNC Symbol;Acc:HGNC:30521]	114	142	105	161	221	218	142	171	147	180	128	187	110	97
ENSMUSG00000010841	75437	Cfap97d1	CFAP97 domain containing 1 [Source:MGI Symbol;Acc:MGI:1922687]	0	0	0	0	0	0	0	0	0	ENSG00000076356	5362	PLXNA2	plexin A2 [Source:HGNC Symbol;Acc:HGNC:9100]	689	817	570	848	576	644	1504	2066	605	591	620	679	382	399
ENSMUSG00000010911	56369	Apip	APAF1 interacting protein [Source:MGI Symbol;Acc:MGI:1926788]	129	119	193	188	162	159	155	192	210	ENSG00000076382	10615	SPAG5	sperm associated antigen 5 [Source:HGNC Symbol;Acc:HGNC:13452]	382	530	131	177	482	524	507	647	477	504	394	480	431	455
ENSMUSG00000010914	27402	Pdhx	pyruvate dehydrogenase complex, component X [Source:MGI Symbol;Acc:MGI:1351627]	261	216	311	228	275	364	225	233	357	ENSG00000076513	88455	ANKRD13A	ankyrin repeat domain 13A [Source:HGNC Symbol;Acc:HGNC:21268]	208	232	239	387	238	242	215	310	205	202	179	188	130	179
ENSMUSG00000010936	234729	Vac14	Vac14 homolog (S. cerevisiae) [Source:MGI Symbol;Acc:MGI:2157980]	658	538	804	650	795	789	563	773	878	ENSG00000076554	7163	TPD52	tumor protein D52 [Source:HGNC Symbol;Acc:HGNC:12005]	18	18	4	7	49	48	78	97	27	29	53	44	87	87
ENSMUSG00000011008	68279	Mcoln2	mucolipin 2 [Source:MGI Symbol;Acc:MGI:1915529]	4	5	13	0	1	1	1	0	6	ENSG00000076555	32	ACACB	acetyl-CoA carboxylase beta [Source:HGNC Symbol;Acc:HGNC:85]	133	120	44	77	86	68	92	125	141	121	79	104	145	134
ENSMUSG00000011034	20537	Slc5a1	solute carrier family 5 (sodium/glucose cotransporter), member 1 [Source:MGI Symbol;Acc:MGI:107678]	0	0	1	0	3	0	0	0	0	ENSG00000076604	9618	TRAF4	TNF receptor associated factor 4 [Source:HGNC Symbol;Acc:HGNC:12034]	672	819	182	323	521	534	392	489	414	369	335	385	312	319
ENSMUSG00000011096	67605	Akt1s1	AKT1 substrate 1 (proline-rich) [Source:MGI Symbol;Acc:MGI:1914855]	379	351	511	381	449	491	432	433	495	ENSG00000076641	55824	PAG1	phosphoprotein membrane anchor with glycosphingolipid microdomains 1 [Source:HGNC Symbol;Acc:HGNC:30043]	737	868	26	41	89	89	301	436	432	350	101	110	98	96
ENSMUSG00000011114	21376	Tbrg1	transforming growth factor beta regulated gene 1 [Source:MGI Symbol;Acc:MGI:1100877]	537	443	755	508	545	686	670	717	834	ENSG00000076650	55094	GPATCH1	G-patch domain containing 1 [Source:HGNC Symbol;Acc:HGNC:24658]	63	55	25	74	70	64	57	86	67	78	51	62	51	60
ENSMUSG00000011118	208098	Panx3	pannexin 3 [Source:MGI Symbol;Acc:MGI:1918881]	0	0	0	2	2	0	0	4	0	ENSG00000076662	3385	ICAM3	intercellular adhesion molecule 3 [Source:HGNC Symbol;Acc:HGNC:5346]	23	10	12	33	1	3	18	32	14	11	4	16	25	9
ENSMUSG00000011148	11565	Adssl1	adenylosuccinate synthetase like 1 [Source:MGI Symbol;Acc:MGI:87947]	19	24	41	16	14	26	54	38	24	ENSG00000076685	22978	NT5C2	5'-nucleotidase, cytosolic II [Source:HGNC Symbol;Acc:HGNC:8022]	275	353	306	493	296	313	356	420	377	371	214	271	255	312
ENSMUSG00000011154	75556	Cfap161	cilia and flagella associated protein 161 [Source:MGI Symbol;Acc:MGI:1922806]	3	0	1	0	0	0	1	4	0	ENSG00000076706	4162	MCAM	melanoma cell adhesion molecule [Source:HGNC Symbol;Acc:HGNC:6934]	140	157	94	155	68	74	103	124	193	204	106	132	112	160
ENSMUSG00000011158	72308	Brf1	BRF1, RNA polymerase III transcription initiation factor 90 kDa subunit [Source:MGI Symbol;Acc:MGI:1919558]	588	553	683	484	551	577	601	612	681	ENSG00000076716	2239	GPC4	glypican 4 [Source:HGNC Symbol;Acc:HGNC:4452]	3452	4178	1302	1862	5301	5556	1559	2083	3362	3366	2606	2896	1578	1771
ENSMUSG00000011171	22355	Vipr2	vasoactive intestinal peptide receptor 2 [Source:MGI Symbol;Acc:MGI:107166]	37	43	52	35	44	36	29	24	22	ENSG00000076770	55796	MBNL3	muscleblind like splicing regulator 3 [Source:HGNC Symbol;Acc:HGNC:20564]	1314	1634	115	191	401	409	273	421	178	149	215	262	111	107
ENSMUSG00000011179	18263	Odc1	ornithine decarboxylase, structural 1 [Source:MGI Symbol;Acc:MGI:97402]	6111	5017	8660	6785	7498	8730	9185	7981	10347	ENSG00000076826	57662	CAMSAP3	calmodulin regulated spectrin associated protein family member 3 [Source:HGNC Symbol;Acc:HGNC:29307]	16	13	2	0	61	79	22	43	54	61	38	56	35	46
ENSMUSG00000011254	66628	Thg1l	tRNA-histidine guanylyltransferase 1-like (S. cerevisiae) [Source:MGI Symbol;Acc:MGI:1913878]	200	154	258	192	205	239	110	219	183	ENSG00000076864	5909	RAP1GAP	RAP1 GTPase activating protein [Source:HGNC Symbol;Acc:HGNC:9858]	29	41	1	3	13	20	29	37	32	24	8	8	55	39
ENSMUSG00000011256	11492	Adam19	a disintegrin and metallopeptidase domain 19 (meltrin beta) [Source:MGI Symbol;Acc:MGI:105377]	406	324	370	231	356	451	534	421	361	ENSG00000076924	56949	XAB2	XPA binding protein 2 [Source:HGNC Symbol;Acc:HGNC:14089]	130	128	79	135	160	174	155	215	149	126	140	166	120	159
ENSMUSG00000011257	230721	Pabpc4	poly(A) binding protein, cytoplasmic 4 [Source:MGI Symbol;Acc:MGI:2385206]	2512	2314	3630	2900	3155	3590	3119	3161	3758	ENSG00000076928	9138	ARHGEF1	Rho guanine nucleotide exchange factor 1 [Source:HGNC Symbol;Acc:HGNC:681]	78	112	166	235	89	83	107	150	115	118	94	113	104	125
ENSMUSG00000011263	74463	Exoc3l2	exocyst complex component 3-like 2 [Source:MGI Symbol;Acc:MGI:1921713]	53	48	74	67	57	64	78	124	64	ENSG00000076944	6813	STXBP2	syntaxin binding protein 2 [Source:HGNC Symbol;Acc:HGNC:11445]	2	3	3	3	5	0	5	4	3	7	4	3	27	15
ENSMUSG00000011267	63872	Zfp296	zinc finger protein 296 [Source:MGI Symbol;Acc:MGI:1926956]	6	9	14	13	6	10	6	6	14	ENSG00000076984	5609	MAP2K7	mitogen-activated protein kinase kinase 7 [Source:HGNC Symbol;Acc:HGNC:6847]	176	236	168	260	249	313	292	383	223	233	226	240	256	322
ENSMUSG00000011305	66968	Plin5	perilipin 5 [Source:MGI Symbol;Acc:MGI:1914218]	5	2	3	4	3	4	2	8	10	ENSG00000077009	27231	NMRK2	nicotinamide riboside kinase 2 [Source:HGNC Symbol;Acc:HGNC:17871]	1	1	0	0	1	0	24	37	2	1	0	1	4	4
ENSMUSG00000011306	70616	Sugp1	SURP and G patch domain containing 1 [Source:MGI Symbol;Acc:MGI:1917866]	530	493	542	531	489	602	605	667	645	ENSG00000077044	8527	DGKD	diacylglycerol kinase delta [Source:HGNC Symbol;Acc:HGNC:2851]	194	228	91	138	200	226	230	262	180	191	139	170	112	150
ENSMUSG00000011349	71241	Dmrtc2	doublesex and mab-3 related transcription factor like family C2 [Source:MGI Symbol;Acc:MGI:1918491]	0	0	0	0	1	0	0	0	0	ENSG00000077063	83992	CTTNBP2	cortactin binding protein 2 [Source:HGNC Symbol;Acc:HGNC:15679]	5	17	2	0	32	39	29	46	60	59	29	40	91	86
ENSMUSG00000011350	.	Gm5893	predicted gene 5893 [Source:MGI Symbol;Acc:MGI:3645761]	1	0	0	0	0	0	0	0	0	ENSG00000077080	51412	ACTL6B	actin like 6B [Source:HGNC Symbol;Acc:HGNC:160]	8	10	0	0	14	5	23	47	18	29	15	13	13	9
ENSMUSG00000011382	71755	Dhdh	dihydrodiol dehydrogenase (dimeric) [Source:MGI Symbol;Acc:MGI:1919005]	216	212	283	210	211	268	447	389	278	ENSG00000077092	5915	RARB	retinoic acid receptor beta [Source:HGNC Symbol;Acc:HGNC:9865]	211	260	463	762	29	51	109	134	214	188	71	82	157	184
ENSMUSG00000011427	233056	Zfp790	zinc finger protein 790 [Source:MGI Symbol;Acc:MGI:1923431]	238	200	223	192	207	250	262	291	268	ENSG00000077097	7155	TOP2B	DNA topoisomerase II beta [Source:HGNC Symbol;Acc:HGNC:11990]	927	1114	544	804	1274	1398	1255	1596	1324	1324	1180	1329	1081	1179
ENSMUSG00000011463	76703	Cpb1	carboxypeptidase B1 (tissue) [Source:MGI Symbol;Acc:MGI:1923953]	0	0	0	0	0	0	0	1	0	ENSG00000077147	56889	TM9SF3	transmembrane 9 superfamily member 3 [Source:HGNC Symbol;Acc:HGNC:21529]	706	807	821	1289	972	991	854	1037	886	864	574	680	591	699
ENSMUSG00000011486	103775	Slc25a41	solute carrier family 25, member 41 [Source:MGI Symbol;Acc:MGI:2144215]	1	0	0	0	0	0	1	0	0	ENSG00000077150	4791	NFKB2	nuclear factor kappa B subunit 2 [Source:HGNC Symbol;Acc:HGNC:7795]	72	92	75	149	66	86	60	79	83	86	57	64	88	115
ENSMUSG00000011589	240121	Fsd1	fibronectin type 3 and SPRY domain-containing protein [Source:MGI Symbol;Acc:MGI:1934858]	142	120	152	111	144	159	172	185	234	ENSG00000077152	29089	UBE2T	ubiquitin conjugating enzyme E2 T [Source:HGNC Symbol;Acc:HGNC:25009]	185	182	35	41	115	155	134	169	112	93	81	91	87	96
ENSMUSG00000011632	641361	Pinlyp	phospholipase A2 inhibitor and LY6/PLAUR domain containing [Source:MGI Symbol;Acc:MGI:3615324]	0	0	0	0	0	0	0	2	0	ENSG00000077157	4660	PPP1R12B	protein phosphatase 1 regulatory subunit 12B [Source:HGNC Symbol;Acc:HGNC:7619]	776	945	474	800	401	506	492	744	762	738	427	495	650	744
ENSMUSG00000011658	70300	Fuz	fuzzy planar cell polarity protein [Source:MGI Symbol;Acc:MGI:1917550]	170	146	225	136	151	167	249	168	223	ENSG00000077232	54431	DNAJC10	DnaJ heat shock protein family (Hsp40) member C10 [Source:HGNC Symbol;Acc:HGNC:24637]	970	1141	1308	2137	1135	1254	1146	1626	1105	1063	792	846	864	979
ENSMUSG00000011751	80297	Sptbn4	spectrin beta, non-erythrocytic 4 [Source:MGI Symbol;Acc:MGI:1890574]	10	11	18	10	9	7	10	22	11	ENSG00000077235	2975	GTF3C1	general transcription factor IIIC subunit 1 [Source:HGNC Symbol;Acc:HGNC:4664]	749	907	586	862	968	990	948	1248	905	931	667	772	832	1003
ENSMUSG00000011752	18648	Pgam1	phosphoglycerate mutase 1 [Source:MGI Symbol;Acc:MGI:97552]	7994	6911	11051	7876	9453	11388	16974	15805	16608	ENSG00000077238	3566	IL4R	interleukin 4 receptor [Source:HGNC Symbol;Acc:HGNC:6015]	25	30	154	245	0	1	133	179	107	106	22	27	70	63
ENSMUSG00000011831	14020	Evi5	ecotropic viral integration site 5 [Source:MGI Symbol;Acc:MGI:104736]	712	596	887	621	760	795	779	870	924	ENSG00000077254	23032	USP33	ubiquitin specific peptidase 33 [Source:HGNC Symbol;Acc:HGNC:20059]	471	559	339	510	578	622	506	644	535	582	437	514	690	788
ENSMUSG00000011832	213027	Evi5l	ecotropic viral integration site 5 like [Source:MGI Symbol;Acc:MGI:2442167]	119	83	110	48	81	87	131	94	119	ENSG00000077264	5063	PAK3	p21 (RAC1) activated kinase 3 [Source:HGNC Symbol;Acc:HGNC:8592]	132	166	31	62	451	511	175	260	262	253	163	192	168	206
ENSMUSG00000011837	102209	Snapc2	small nuclear RNA activating complex, polypeptide 2 [Source:MGI Symbol;Acc:MGI:1914861]	305	238	318	273	304	426	268	302	399	ENSG00000077274	827	CAPN6	calpain 6 [Source:HGNC Symbol;Acc:HGNC:1483]	19	35	266	474	1	2	243	340	3	5	4	5	8	13
ENSMUSG00000011877	216963	Git1	GIT ArfGAP 1 [Source:MGI Symbol;Acc:MGI:1927140]	1295	1078	1411	1143	1185	1580	1316	1554	1610	ENSG00000077279	1641	DCX	doublecortin [Source:HGNC Symbol;Acc:HGNC:2714]	971	1203	50	72	2695	3050	2066	2881	2067	2081	2122	2324	1687	1997
ENSMUSG00000011884	56356	Gltp	glycolipid transfer protein [Source:MGI Symbol;Acc:MGI:1929253]	378	310	576	340	397	466	372	413	492	ENSG00000077312	6626	SNRPA	small nuclear ribonucleoprotein polypeptide A [Source:HGNC Symbol;Acc:HGNC:11151]	419	498	205	338	598	599	565	846	473	466	405	466	437	532
ENSMUSG00000011958	12175	Bnip2	BCL2/adenovirus E1B interacting protein 2 [Source:MGI Symbol;Acc:MGI:109327]	692	601	786	639	702	830	549	655	779	ENSG00000077327	9576	SPAG6	sperm associated antigen 6 [Source:HGNC Symbol;Acc:HGNC:11215]	2	0	0	1	1	1	3	10	2	3	5	0	3	2
ENSMUSG00000011960	12455	Ccnt1	cyclin T1 [Source:MGI Symbol;Acc:MGI:1328363]	1670	1504	1927	1548	1714	2023	1725	1987	2083	ENSG00000077348	56915	EXOSC5	exosome component 5 [Source:HGNC Symbol;Acc:HGNC:24662]	36	40	31	37	53	47	48	78	23	32	33	27	36	42
ENSMUSG00000012017	224024	Scarf2	scavenger receptor class F, member 2 [Source:MGI Symbol;Acc:MGI:1858430]	308	238	283	233	219	287	374	380	323	ENSG00000077380	1781	DYNC1I2	dynein cytoplasmic 1 intermediate chain 2 [Source:HGNC Symbol;Acc:HGNC:2964]	625	672	495	868	696	748	840	1063	736	709	498	600	479	589
ENSMUSG00000012042	67741	4930579F01Rik	RIKEN cDNA 4930579F01 gene [Source:MGI Symbol;Acc:MGI:1914991]	0	0	1	0	1	0	0	0	0	ENSG00000077420	54518	APBB1IP	amyloid beta precursor protein binding family B member 1 interacting protein [Source:HGNC Symbol;Acc:HGNC:17379]	1	0	0	0	1	0	2	0	1	1	3	0	0	0
ENSMUSG00000012076	52592	Brms1l	breast cancer metastasis-suppressor 1-like [Source:MGI Symbol;Acc:MGI:1196337]	207	208	301	214	224	267	160	281	285	ENSG00000077454	4034	LRCH4	leucine rich repeats and calponin homology domain containing 4 [Source:HGNC Symbol;Acc:HGNC:6691]	113	167	205	308	191	203	230	379	237	222	159	209	348	393
ENSMUSG00000012114	94112	Med15	mediator complex subunit 15 [Source:MGI Symbol;Acc:MGI:2137379]	801	638	903	721	731	863	865	906	1026	ENSG00000077458	143684	FAM76B	family with sequence similarity 76 member B [Source:HGNC Symbol;Acc:HGNC:28492]	107	135	78	85	152	154	148	185	163	132	137	159	137	140
ENSMUSG00000012117	67422	Dhdds	dehydrodolichyl diphosphate synthase [Source:MGI Symbol;Acc:MGI:1914672]	376	368	430	385	355	407	365	403	496	ENSG00000077463	51548	SIRT6	sirtuin 6 [Source:HGNC Symbol;Acc:HGNC:14934]	42	51	30	51	67	44	45	57	52	39	41	37	44	43
ENSMUSG00000012123	230806	Crybg2	crystallin beta-gamma domain containing 2 [Source:MGI Symbol;Acc:MGI:1334463]	24	15	27	14	21	26	20	20	19	ENSG00000077498	7299	TYR	tyrosinase [Source:HGNC Symbol;Acc:HGNC:12442]	3	1	0	3	2	2	1	0	4	2	0	1	0	1
ENSMUSG00000012126	67586	Ubxn11	UBX domain protein 11 [Source:MGI Symbol;Acc:MGI:1914836]	31	21	29	22	14	23	33	23	27	ENSG00000077514	10714	POLD3	DNA polymerase delta 3, accessory subunit [Source:HGNC Symbol;Acc:HGNC:20932]	235	248	97	127	299	342	356	486	227	211	197	211	168	200
ENSMUSG00000012187	68393	Mogat1	monoacylglycerol O-acyltransferase 1 [Source:MGI Symbol;Acc:MGI:1915643]	2	0	6	2	3	2	0	0	2	ENSG00000077522	88	ACTN2	actinin alpha 2 [Source:HGNC Symbol;Acc:HGNC:164]	1	2	1	3	6	10	447	522	5	5	3	1	7	10
ENSMUSG00000012211	75671	Tex22	testis expressed gene 22 [Source:MGI Symbol;Acc:MGI:1922921]	2	3	1	3	4	3	1	0	5	ENSG00000077549	832	CAPZB	capping actin protein of muscle Z-line subunit beta [Source:HGNC Symbol;Acc:HGNC:1491]	1113	1261	998	1572	941	1191	1063	1597	1110	1044	763	810	969	1157
ENSMUSG00000012282	20890	Wnt8a	wingless-type MMTV integration site family, member 8A [Source:MGI Symbol;Acc:MGI:107924]	3	0	0	0	2	0	0	0	0	ENSG00000077585	7107	GPR137B	G protein-coupled receptor 137B [Source:HGNC Symbol;Acc:HGNC:11862]	59	62	42	50	44	56	53	75	72	64	35	34	62	106
ENSMUSG00000012296	74094	Tjap1	tight junction associated protein 1 [Source:MGI Symbol;Acc:MGI:1921344]	405	424	525	403	451	538	461	572	528	ENSG00000077616	10003	NAALAD2	N-acetylated alpha-linked acidic dipeptidase 2 [Source:HGNC Symbol;Acc:HGNC:14526]	102	120	16	13	113	125	90	146	136	127	142	144	271	320
ENSMUSG00000012350	13661	Ehf	ets homologous factor [Source:MGI Symbol;Acc:MGI:1270840]	0	3	2	1	3	1	1	6	0	ENSG00000077684	79960	JADE1	jade family PHD finger 1 [Source:HGNC Symbol;Acc:HGNC:30027]	232	284	190	343	318	356	219	339	395	359	295	324	335	327
ENSMUSG00000012396	71950	Nanog	Nanog homeobox [Source:MGI Symbol;Acc:MGI:1919200]	3	6	3	0	1	0	0	3	3	ENSG00000077713	203427	SLC25A43	solute carrier family 25 member 43 [Source:HGNC Symbol;Acc:HGNC:30557]	31	54	93	136	5	5	10	21	10	6	2	2	13	6
ENSMUSG00000012405	66480	Rpl15	ribosomal protein L15 [Source:MGI Symbol;Acc:MGI:1913730]	6265	5524	8922	6297	7288	8894	8249	8562	10288	ENSG00000077721	7319	UBE2A	ubiquitin conjugating enzyme E2 A [Source:HGNC Symbol;Acc:HGNC:12472]	341	372	252	378	295	343	286	496	285	322	194	225	259	262
ENSMUSG00000012422	66074	Tmem167	transmembrane protein 167 [Source:MGI Symbol;Acc:MGI:1913324]	1364	1239	1707	1281	1507	1691	1212	1585	1546	ENSG00000077782	2260	FGFR1	fibroblast growth factor receptor 1 [Source:HGNC Symbol;Acc:HGNC:3688]	1515	1869	955	1495	3121	3302	1864	2567	1724	1620	1563	1830	2511	3085
ENSMUSG00000012428	117167	Steap4	STEAP family member 4 [Source:MGI Symbol;Acc:MGI:1923560]	1	0	3	0	0	2	7	1	3	ENSG00000077800	8468	FKBP6	FKBP prolyl isomerase 6 [Source:HGNC Symbol;Acc:HGNC:3722]	1	4	0	0	0	0	2	0	4	0	5	2	1	0
[truncated: 59,230 more rows]
[truncated: 6 more columns]
