# Supplementary material for: TREX tetramer disruption alters RNA processing necessary for corticogenesis in THOC6 Intellectual Disability Syndrome
Source: Nat Commun. 2024 Feb 22;15:1640. doi: 10.1038/s41467-024-45948-y (PMC10884030; doi:10.1038/s41467-024-45948-y)
Supplement: Supplementary file 4 — Supplementary Data 2 [file 41467_2024_45948_MOESM4_ESM.xlsx]

## Sheet: rMATS
E188K/E188K vs W100*/+
SE																		RI																	A5SS
ID	GeneID	Gene Symbol	Chromosome	Strand	Exon start (ES)	Exon end (EE)	upstreamES	upstreamEE	downstreamES	downstreamEE	Event length	PValue	FDR	Inclusion Level 1	Inclusion Level 2	Inclusion Level Difference		ID	GeneID	geneSymbol	chr	strand	riExonStart_0base	riExonEnd	upstreamES	upstreamEE	downstreamES	downstreamEE	IncFormLen	PValue	FDR	Inclusion Level 1	Inclusion Level 2	Inclusion Level Difference	ID	GeneID	geneSymbol	chr	strand	longExonStart_0base	longExonEnd	shortES	shortEE	flankingES	flankingEE	PValue	FDR	Inclusion Level 1	Inclusion Level 2
33220	ENSG00000104490.18	NCALD	chr8	-	101887140	101887227	101719251	101719648	101915808	101915858	236	0	0	0.0,0.0	0.974,0.959	-0.966		5397	ENSG00000174365.20	SNHG11	chr20	+	38448661	38450447	38448661	38448730	38450261	38450447	1680	6.69054e-12	1.57663e-08	1.0,1.0	0.262,0.042	0.848	4282	ENSG00000102103.17	PQBP1	chrX	+	48897911	48898093	48897911	48898082	48898491	48898576	0	0	0.875,1.0	0.125,0.0
44550	ENSG00000145012.14	LPP	chr3	+	188341662	188341719	188225404	188225527	188406111	188406313	206	0	0	1.0,0.871	0.087,0.057	0.864		5504	ENSG00000170421.12	KRT8	chr12	-	52900587	52902072	52900587	52901219	52901863	52902072	793	4.35985e-12	1.57663e-08	0.273,0.0	1.0,1.0	-0.863	2458	ENSG00000055950.16	MRPL43	chr10	-	100986686	100986975	100986748	100986975	100983754	100983817	5.28577e-13	8.38588e-10	0.876,0.898	0.301,0.34
33211	ENSG00000104490.18	NCALD	chr8	-	101779923	101779979	101719385	101719648	101887140	101887227	205	4.44089e-16	4.50292e-12	1.0,1.0	0.017,0.062	0.961		4362	ENSG00000168394.12	TAP1	chr6	-	32847067	32847675	32847067	32847204	32847512	32847675	457	3.79089e-10	4.46661e-07	1.0,1.0	0.0,0.0	1	1375	ENSG00000103275.21	UBE2I	chr16	+	1312346	1312603	1312346	1312558	1314019	1314096	1.35362e-11	1.43168e-08	1.0,1.0	0.099,0.133
33221	ENSG00000104490.18	NCALD	chr8	-	101887140	101887227	101779923	101779979	101915808	101915858	236	2.10942e-15	1.60416e-11	0.0,0.0	1.0,1.0	-1		5503	ENSG00000170421.12	KRT8	chr12	-	52900587	52901219	52900587	52900683	52901158	52901219	624	3.46687e-10	4.46661e-07	0.0,0.074	1.0,1.0	-0.963	3628	ENSG00000092621.13	PHGDH	chr1	+	119721169	119721654	119721169	119721321	119723375	119723441	6.37409e-11	5.05625e-08	0.0,0.0	1.0,1.0
47462	ENSG00000120451.11	SNX19	chr11	-	130880621	130880806	130879623	130879711	130903254	130903384	334	8.65974e-15	5.26841e-11	0.506,0.48	1.0,1.0	-0.507		5737	ENSG00000182307.14	C8orf33	chr8	+	145052466	145052897	145052466	145052497	145052585	145052897	237	6.6567e-10	6.27461e-07	0.0,0.0	1.0,1.0	-1	4602	ENSG00000179818.15	PCBP1-AS1	chr2	-	70055655	70055910	70055713	70055910	70051202	70051305	9.95053e-10	6.31461e-07	0.0,0.0	1.0,1.0
32123	ENSG00000188732.11	FAM221A	chr7	+	23686288	23688987	23684498	23684672	23689268	23689459	2848	1.14353e-14	5.79751e-11	0.223,0.025	1.0,1.0	-0.876		6255	ENSG00000170485.17	NPAS2	chr2	+	100982230	100988276	100982230	100982377	100988078	100988276	5850	9.16084e-10	7.19584e-07	0.239,0.148	1.0,1.0	-0.806	1486	ENSG00000140416.23	TPM1	chr15	+	63060868	63061273	63060868	63060939	63061712	63061788	1.55819e-09	8.24024e-07	0.342,0.42	0.84,0.793
10578	ENSG00000228315.12	GUSBP11	chr22	-	23683724	23683867	23659864	23660000	23690235	23690356	292	9.0683e-13	3.9407e-09	0.0,0.0	1.0,1.0	-1		231	ENSG00000099953.10	MMP11	chr22	+	23779186	23780502	23779186	23779416	23780358	23780502	1091	1.62627e-09	1.09494e-06	0.353,0.12	1.0,1.0	-0.764	7709	ENSG00000224616.3	RTCA-AS1	chr1	-	100265814	100265917	100265828	100265917	100265152	100265247	6.03432e-09	2.73527e-06	1.0,1.0	0.0,0.0
3518	ENSG00000010361.14	FUZ	chr19	-	49812446	49812685	49812279	49812335	49812995	49813284	388	2.13074e-12	8.10187e-09	0.113,0.0	1.0,1.0	-0.944		8028	ENSG00000073060.17	SCARB1	chr12	-	124782682	124786503	124782682	124782811	124786356	124786503	3694	2.2996e-09	1.35475e-06	0.16,0.215	1.0,1.0	-0.812	1376	ENSG00000103275.21	UBE2I	chr16	+	1312346	1312667	1312346	1312558	1314019	1314096	1.5935e-08	6.32021e-06	1.0,1.0	0.366,0.188
46276	ENSG00000176731.12	RBIS	chr8	-	85219235	85219363	85217385	85217502	85220305	85220384	277	2.67864e-12	9.05349e-09	0.548,0.544	0.0,0.0	0.546		1759	ENSG00000137801.11	THBS1	chr15	+	39593396	39594196	39593396	39593668	39594098	39594196	579	5.333e-09	2.79272e-06	0.029,0.017	0.091,0.077	-0.061	1136	ENSG00000198931.11	APRT	chr16	-	88811496	88811656	88811549	88811656	88810069	88810148	4.97098e-08	1.75255e-05	0.0,0.356	1.0,1.0
45499	ENSG00000131368.8	MRPS25	chr3	-	15053290	15053467	15049880	15049935	15059368	15059475	326	3.62754e-12	1.10346e-08	0.186,0.0	1.0,1.0	-0.907		1863	ENSG00000139428.12	MMAB	chr12	-	109561039	109561329	109561039	109561104	109561242	109561329	287	1.83087e-08	7.06804e-06	0.135,0.229	0.824,0.903	-0.681	1585	ENSG00000134291.12	TMEM106C	chr12	+	47964208	47964462	47964208	47964423	47966682	47966732	5.9541e-08	1.88924e-05	1.0,1.0	0.284,0.0
41351	ENSG00000162924.15	REL	chr2	+	60898969	60900884	60894396	60894545	60900991	60901083	2064	6.0677e-12	1.67794e-08	0.178,0.078	1.0,1.0	-0.872		5604	ENSG00000197558.13	SSPOP	chr7	+	149826912	149827985	149826912	149826959	149827768	149827985	958	2.09957e-08	7.06804e-06	0.121,0.363	1.0,1.0	-0.758	1841	ENSG00000119723.17	COQ6	chr14	+	73950309	73950597	73950309	73950495	73953434	73953569	1.29656e-07	3.73999e-05	0.543,1.0	0.0,0.0
37430	ENSG00000237877.7	LINC01473	chr2	-	186038330	186038432	186032883	186033802	186039499	186039555	251	7.67086e-12	1.91757e-08	1.0,1.0	0.09,0.145	0.883		6284	ENSG00000181085.15	MAPK15	chr8	+	143720229	143720840	143720229	143720287	143720702	143720840	564	2.06505e-08	7.06804e-06	0.492,0.27	1.0,1.0	-0.619	6427	ENSG00000140474.14	ULK3	chr15	-	74837750	74837798	74837756	74837798	74837368	74837435	1.57506e-07	4.16473e-05	0.49,0.49	1.0,1.0
46275	ENSG00000176731.12	RBIS	chr8	-	85219235	85219360	85217385	85217502	85220305	85220353	274	8.195e-12	1.91757e-08	0.536,0.521	0.0,0.0	0.528		7126	ENSG00000156113.24	KCNMA1	chr10	-	76909965	76915049	76909965	76910096	76914935	76915049	4988	1.60913e-08	7.06804e-06	0.101,0.092	1.0,1.0	-0.903	5900	ENSG00000161010.15	MRNIP	chr5	-	179853196	179853437	179853377	179853437	179847977	179848066	2.02341e-07	4.93867e-05	0.311,0.131	1.0,1.0
53509	ENSG00000089157.16	RPLP0	chr12	-	120198553	120198770	120197321	120197462	120198853	120199000	366	1.02628e-11	2.22988e-08	0.577,0.694	0.971,1.0	-0.35		7512	ENSG00000172932.16	ANKRD13D	chr11	+	67291475	67291746	67291475	67291521	67291602	67291746	230	1.82077e-08	7.06804e-06	0.0,0.447	1.0,1.0	-0.776	3512	ENSG00000109133.13	TMEM33	chr4	+	41935128	41935310	41935128	41935262	41935466	41935529	3.18988e-07	7.22962e-05	0.602,0.0	1.0,1.0
4784	ENSG00000174652.20	ZNF266	chr19	-	9434064	9434235	9420064	9420218	9434797	9434859	320	1.5449e-11	3.13295e-08	1.0,1.0	0.0,0.157	0.921		5983	ENSG00000010270.14	STARD3NL	chr7	+	38215027	38217305	38215027	38215105	38217187	38217305	2231	5.90438e-08	1.85516e-05	0.465,0.362	1.0,1.0	-0.587	4463	ENSG00000115524.17	SF3B1	chr2	-	197418895	197420542	197420427	197420542	197418508	197418588	9.89347e-07	0.00020928	0.643,0.695	0.472,0.41
45502	ENSG00000131368.8	MRPS25	chr3	-	15053379	15053467	15049211	15049935	15059368	15059475	237	2.06092e-11	3.91819e-08	0.239,0.0	1.0,1.0	-0.881		5128	ENSG00000120008.16	WDR11	chr10	+	120889077	120890009	120889077	120889184	120889894	120890009	859	7.8753e-08	2.17783e-05	1.0,1.0	0.188,0.188	0.812	2451	ENSG00000185513.17	L3MBTL1	chr20	+	43530283	43530889	43530283	43530419	43532772	43532924	1.19989e-06	0.000237952	0.546,0.52	1.0,1.0
44549	ENSG00000145012.14	LPP	chr3	+	188341662	188341719	188153941	188154021	188406111	188406313	206	3.26663e-11	5.84516e-08	1.0,0.953	0.0,0.266	0.843		8182	ENSG00000130813.18	SHFL	chr19	+	10091249	10091630	10091249	10091353	10091475	10091630	271	7.49282e-08	2.17783e-05	0.216,0.121	1.0,1.0	-0.832	7556	ENSG00000120697.10	ALG5	chr13	-	36994988	36995596	36995424	36995596	36993603	36993672	1.33503e-06	0.000249179	0.113,0.696	1.0,1.0
65517	ENSG00000173588.15	CEP83	chr12	-	94435274	94435327	94412317	94412591	94459556	94459867	202	3.9182e-11	6.62154e-08	0.0,0.063	1.0,1.0	-0.969		8386	ENSG00000189171.15	S100A13	chr1	-	153626319	153627598	153626319	153626533	153627482	153627598	1098	8.31761e-08	2.17783e-05	0.416,0.352	1.0,1.0	-0.616	3499	ENSG00000117616.18	RSRP1	chr1	-	25244176	25245301	25245149	25245301	25243549	25243633	2.29581e-06	0.0004047	0.499,0.791	1.0,1.0
65554	ENSG00000092330.18	TINF2	chr14	-	24241674	24241776	24239681	24240875	24242140	24242605	251	7.0876e-11	1.13472e-07	0.0,0.284	1.0,1.0	-0.858		3176	ENSG00000137563.13	GGH	chr8	-	63027180	63030217	63027180	63027265	63030166	63030217	3050	1.16589e-07	2.89203e-05	0.5,0.334	1.0,1.0	-0.583	5372	ENSG00000118518.17	RNF146	chr6	+	127266863	127267044	127266863	127266925	127280230	127280340	2.98367e-06	0.000498273	0.0,0.0	1.0,0.357
4785	ENSG00000174652.20	ZNF266	chr19	-	9434074	9434235	9420064	9420218	9434797	9434859	310	1.01908e-10	1.54997e-07	1.0,1.0	0.0,0.224	0.888		6147	ENSG00000177042.16	TMEM80	chr11	+	698868	700235	698868	698888	700141	700235	1402	1.4431e-07	3.40067e-05	0.402,0.598	1.0,1.0	-0.5	6531	ENSG00000160326.14	SLC2A6	chr9	-	133473414	133474088	133473979	133474088	133473104	133473250	3.36223e-06	0.000533418	0.745,0.431	1.0,1.0
49647	ENSG00000132436.12	FIGNL1	chr7	-	50449117	50449723	50448180	50448289	50450300	50450350	755	1.11044e-10	1.6085e-07	1.0,1.0	0.0,0.0	1		7615	ENSG00000110274.16	CEP164	chr11	+	117394919	117395191	117394919	117395003	117395122	117395191	268	1.5844e-07	3.55584e-05	0.625,0.714	0.0,0.0	0.669	2445	ENSG00000205981.8	DNAJC19	chr3	-	180986947	180987022	180986997	180987022	180985925	180985996	3.66691e-06	0.000554052	0.272,0.0	1.0,0.805
37431	ENSG00000237877.7	LINC01473	chr2	-	186038330	186038435	186032883	186033802	186039499	186039555	254	1.20843e-10	1.62797e-07	1.0,1.0	0.089,0.077	0.917		5523	ENSG00000144591.20	GMPPA	chr2	+	219505457	219505761	219505457	219505555	219505714	219505761	308	2.00443e-07	4.29404e-05	0.492,0.195	1.0,1.0	-0.656	6920	ENSG00000170144.21	HNRNPA3	chr2	+	177212740	177212871	177212740	177212805	177215538	177215661	4.80707e-06	0.00069331	0.735,0.366	1.0,1.0
51763	ENSG00000134574.12	DDB2	chr11	+	47233226	47233474	47232813	47232959	47234572	47234672	397	1.23092e-10	1.62797e-07	1.0,1.0	0.0,0.0	1		2705	ENSG00000185513.17	L3MBTL1	chr20	+	43530283	43532924	43530283	43530419	43532772	43532924	2502	3.36792e-07	6.49331e-05	0.463,0.559	1.0,1.0	-0.489	2652	ENSG00000173846.13	PLK3	chr1	+	44804338	44804779	44804338	44804501	44805265	44805379	5.24637e-06	0.000723771	0.677,0.344	1.0,1.0
54942	ENSG00000184428.13	TOP1MT	chr8	-	143332486	143332601	143331223	143331339	143334739	143334854	264	1.55301e-10	1.96838e-07	0.0,0.0	1.0,1.0	-1		5106	ENSG00000159348.13	CYB5R1	chr1	-	202965886	202966600	202965886	202965993	202966527	202966600	683	3.62612e-07	6.49331e-05	0.287,0.319	0.875,0.864	-0.567	3847	ENSG00000138095.20	LRPPRC	chr2	-	43995773	43995962	43995798	43995962	43982237	43982434	5.87358e-06	0.000776536	0.042,0.222	0.0,0.0
44587	ENSG00000089775.12	ZBTB25	chr14	-	64487113	64487196	64449329	64449638	64490360	64490533	232	1.64299e-10	1.99912e-07	1.0,1.0	0.0,0.0	1		5717	ENSG00000010278.15	CD9	chr12	+	6232631	6233486	6232631	6232729	6233411	6233486	831	3.71991e-07	6.49331e-05	0.264,0.0	1.0,1.0	-0.868	3469	ENSG00000138380.18	CARF	chr2	+	202913033	202913114	202913033	202913102	202917876	202918043	1.19683e-05	0.00151902	1.0,1.0	0.0,0.481
31875	ENSG00000153113.24	CAST	chr5	+	96740744	96740783	96740037	96740118	96741265	96741317	188	2.11303e-10	2.47216e-07	0.559,0.624	1.0,1.0	-0.408		7320	ENSG00000105227.16	PRX	chr19	-	40393767	40398816	40393767	40397970	40398619	40398816	798	3.62403e-07	6.49331e-05	0.303,0.318	1.0,1.0	-0.69	612	ENSG00000105655.19	ISYNA1	chr19	-	18437598	18437988	18437859	18437988	18436972	18437105	1.36041e-05	0.0016462	0.548,0.548	1.0,1.0
39278	ENSG00000069020.18	MAST4	chr5	+	66963706	66963787	66958869	66959294	67054403	67054492	230	4.55564e-10	4.94921e-07	0.0,0.0	1.0,1.0	-1		7789	ENSG00000257337.7	RP11-983P16.4	chr12	-	53045599	53046061	53045599	53045653	53045960	53046061	456	3.44289e-07	6.49331e-05	0.0,0.0	0.395,1.0	-0.698	2950	ENSG00000118420.17	UBE3D	chr6	-	83022452	83022561	83022478	83022561	83018972	83019136	1.50456e-05	0.0016462	0.81,0.422	1.0,1.0
57717	ENSG00000160323.19	ADAMTS13	chr9	+	133438245	133438366	133437748	133437897	133439365	133439446	270	4.48453e-10	4.94921e-07	0.0,0.0	0.688,1.0	-0.844		298	ENSG00000156256.15	USP16	chr21	+	29042471	29043599	29042471	29042528	29043422	29043599	1043	4.43556e-07	7.466e-05	0.588,0.364	1.0,1.0	-0.524	3883	ENSG00000141279.17	NPEPPS	chr17	+	47619277	47619495	47619277	47619322	47619736	47619784	1.47181e-05	0.0016462	0.481,1.0	0.0,0.0
40171	ENSG00000179818.15	PCBP1-AS1	chr2	-	70053730	70053792	70051044	70051305	70055713	70055823	211	6.00883e-10	6.30284e-07	0.0,0.0	1.0,1.0	-1		7601	ENSG00000182809.11	CRIP2	chr14	+	105478449	105478871	105478449	105478507	105478730	105478871	372	5.20815e-07	8.46413e-05	0.219,0.247	0.0,0.0	0.233	6172	ENSG00000147687.19	TATDN1	chr8	-	124518741	124518881	124518817	124518881	124515886	124516030	1.44844e-05	0.0016462	0.665,0.726	0.142,0.0
56464	ENSG00000169071.15	ROR2	chr9	-	91886667	91886770	91883257	91883383	91949866	91950228	252	6.58982e-10	6.68186e-07	1.0,1.0	0.0,0.0	1		3753	ENSG00000173947.14	PIFO	chr1	+	111348515	111350223	111348515	111348646	111350105	111350223	1608	5.89061e-07	8.94731e-05	0.27,0.156	1.0,1.0	-0.787	4133	ENSG00000150471.17	ADGRL3	chr4	+	62068165	62068217	62068165	62068183	62070108	62078335	2.51747e-05	0.00266265	0.352,0.671	1.0,1.0
4598	ENSG00000104907.13	TRMT1	chr19	-	13109914	13110001	13109768	13109838	13110157	13110306	236	7.94259e-10	7.42744e-07	0.427,0.573	1.0,1.0	-0.5		4844	ENSG00000115524.17	SF3B1	chr2	-	197418508	197420542	197418508	197418588	197420427	197420542	1988	6.26483e-07	8.94731e-05	0.628,0.688	0.454,0.397	0.232	1933	ENSG00000173575.22	CHD2	chr15	+	92953356	92954336	92953356	92953573	92955422	92955512	2.72454e-05	0.0027887	0.635,0.495	1.0,1.0
10577	ENSG00000228315.12	GUSBP11	chr22	-	23683724	23683867	23659864	23660000	23690231	23690293	292	8.05764e-10	7.42744e-07	0.0,0.0	1.0,1.0	-1		5055	ENSG00000214655.11	ZSWIM8	chr10	+	73800639	73801195	73800639	73800759	73801084	73801195	474	6.18989e-07	8.94731e-05	0.68,0.278	1.0,1.0	-0.521	6856	ENSG00000269893.8	SNHG8	chr4	+	118278708	118279137	118278708	118278792	118279388	118279431	3.87373e-05	0.00384104	0.698,0.686	1.0,1.0
69366	ENSG00000224078.15	SNHG14	chr15	+	25213458	25213590	25212123	25212169	25213973	25214018	281	7.78654e-10	7.42744e-07	0.0,0.0	1.0,1.0	-1		8091	ENSG00000120697.10	ALG5	chr13	-	36993603	36995596	36993603	36993672	36995424	36995596	1901	5.73438e-07	8.94731e-05	0.292,0.611	1.0,1.0	-0.548	5078	ENSG00000164211.13	STARD4	chr5	-	111512384	111512535	111512390	111512535	111507328	111507442	4.4277e-05	0.0042573	0.579,0.862	1.0,1.0
39697	ENSG00000198791.12	CNOT7	chr8	-	17245856	17245931	17245035	17245247	17246172	17246448	224	9.00484e-10	8.05642e-07	0.0,0.0	1.0,0.727	-0.863		2220	ENSG00000103723.17	AP3B2	chr15	-	82663126	82663620	82663126	82663295	82663559	82663620	413	1.00054e-06	0.000138692	1.0,1.0	0.591,0.265	0.572	1165	ENSG00000261008.7	LINC01572	chr16	-	72570434	72570515	72570450	72570515	72555264	72555326	5.6059e-05	0.00523163	0.575,1.0	0.0,0.0
43694	ENSG00000164484.12	TMEM200A	chr6	+	130385172	130385236	130366016	130366524	130440406	130443067	213	9.84655e-10	8.55777e-07	0.0,0.296	1.0,1.0	-0.852		4746	ENSG00000142871.18	CCN1	chr1	+	85581364	85582284	85581364	85581578	85581927	85582284	498	1.18212e-06	0.000159181	0.063,0.068	0.126,0.103	-0.049	5272	ENSG00000165410.15	CFL2	chr14	-	34713253	34713561	34713396	34713561	34713059	34713136	5.81513e-05	0.00527183	0.9,0.793	1.0,1.0
13993	ENSG00000226752.9	CUTALP	chr9	+	120850362	120850657	120847293	120847353	120851237	120851524	444	1.75712e-09	1.48472e-06	0.0,0.0	1.0,1.0	-1		6697	ENSG00000160948.14	VPS28	chr8	-	144424945	144425772	144424945	144425000	144425682	144425772	831	1.873e-06	0.000245207	1.0,0.92	0.467,0.634	0.409	2154	ENSG00000143473.13	KCNH1	chr1	-	211018782	211019256	211018863	211019256	210919639	210920069	6.48718e-05	0.00571773	1.0,1.0	0.302,0.564
11125	ENSG00000157890.18	MEGF11	chr15	-	65916597	65916956	65916147	65916276	65917965	65918094	508	1.99196e-09	1.62313e-06	0.0,0.0	1.0,1.0	-1		1816	ENSG00000203875.13	SNHG5	chr6	-	85677423	85678188	85677423	85678032	85678135	85678188	252	2.34255e-06	0.000298391	0.09,0.056	0.268,0.207	-0.164	1548	ENSG00000128463.13	EMC4	chr15	+	34225535	34225658	34225535	34225650	34227692	34227846	7.10848e-05	0.00581077	0.345,0.137	0.0,0.0
52965	ENSG00000070501.12	POLB	chr8	+	42344952	42345019	42338453	42338685	42355515	42355567	216	2.02765e-09	1.62313e-06	1.0,1.0	0.0,0.0	1		3716	ENSG00000131697.18	NPHP4	chr1	-	5862810	5864033	5862810	5863405	5863889	5864033	633	2.68843e-06	0.000324886	0.739,0.105	1.0,1.0	-0.578	4795	ENSG00000115282.21	TTC31	chr2	+	74483321	74483563	74483321	74483410	74490243	74490473	7.03506e-05	0.00581077	1.0,1.0	0.33,0.33
667	ENSG00000102349.18	KLF8	chrX	+	56270181	56270321	56265179	56269489	56284312	56285097	289	2.23231e-09	1.71085e-06	1.0,1.0	0.0,0.0	1		6094	ENSG00000087266.17	SH3BP2	chr4	+	2831922	2832412	2831922	2831978	2832330	2832412	501	2.62094e-06	0.000324886	0.229,0.373	0.0,0.0	0.301	5876	ENSG00000122783.17	CYREN	chr7	-	135168785	135169060	135168968	135169060	135167731	135167807	7.14214e-05	0.00581077	0.745,0.843	1.0,0.966
1556	ENSG00000253352.10	TUG1	chr22	+	30972047	30972172	30971366	30971779	30972854	30973587	274	2.40466e-09	1.71085e-06	0.0,0.0	0.057,0.069	-0.063		1810	ENSG00000203875.13	SNHG5	chr6	-	85677078	85677875	85677078	85677492	85677794	85677875	451	3.08709e-06	0.000361501	0.165,0.149	0.415,0.582	-0.341	5871	ENSG00000122783.17	CYREN	chr7	-	135168744	135169060	135168968	135169060	135167731	135167807	8.54702e-05	0.00677992	0.732,0.848	1.0,0.96
12229	ENSG00000146426.19	TIAM2	chr6	+	155016240	155016361	154944115	154944206	155090288	155090379	270	2.41845e-09	1.71085e-06	0.0,0.0	1.0,1.0	-1		3799	ENSG00000117616.18	RSRP1	chr1	-	25243549	25245301	25243549	25243633	25245149	25245301	1665	3.14482e-06	0.000361501	0.563,0.822	1.0,1.0	-0.308	5877	ENSG00000122783.17	CYREN	chr7	-	135168930	135169060	135168968	135169060	135167731	135167807	9.4543e-05	0.00731671	0.285,0.443	1.0,0.761
34219	ENSG00000169122.11	FAM110B	chr8	+	58197830	58198157	58075534	58075623	58203514	58204279	476	2.28746e-09	1.71085e-06	1.0,1.0	0.0,0.0	1		4112	ENSG00000122435.10	TRMT13	chr1	+	100140407	100141019	100140407	100140514	100140851	100141019	486	3.40602e-06	0.000382204	0.17,0.479	1.0,1.0	-0.675	5874	ENSG00000122783.17	CYREN	chr7	-	135168748	135169060	135168968	135169060	135167731	135167807	9.94281e-05	0.00751156	0.784,0.866	1.0,0.967
52143	ENSG00000126522.17	ASL	chr7	+	66081802	66081997	66075833	66076093	66082367	66082451	344	2.33544e-09	1.71085e-06	1.0,1.0	0.0,0.0	1		3115	ENSG00000075826.17	SEC31B	chr10	-	100488857	100489398	100488857	100488974	100489251	100489398	426	4.35617e-06	0.000477456	1.0,1.0	0.759,0.583	0.329	6671	ENSG00000108179.14	PPIF	chr10	+	79351486	79351714	79351486	79351583	79352316	79352392	0.000110348	0.00814262	0.0,0.025	0.127,0.071
755	ENSG00000102312.24	PORCN	chrX	+	48509423	48509577	48509029	48509103	48509783	48509956	303	2.65597e-09	1.83618e-06	0.164,0.33	1.0,1.0	-0.753		7667	ENSG00000002016.18	RAD52	chr12	-	926795	927263	926795	926946	927144	927263	347	5.21714e-06	0.000558827	0.491,0.741	1.0,1.0	-0.384	958	ENSG00000012048.23	BRCA1	chr17	-	43125270	43125370	43125276	43125370	43124016	43124115	0.000127114	0.00916666	0.435,0.325	1.0,0.658
34952	ENSG00000123600.21	METTL8	chr2	-	171414602	171414726	171392042	171392197	171433882	171434087	273	3.00783e-09	1.98903e-06	0.45,0.0	1.0,1.0	-0.775		3314	ENSG00000157191.20	NECAP2	chr1	+	16449092	16452015	16449092	16449201	16451837	16452015	2785	5.95592e-06	0.000610223	1.0,1.0	0.465,0.658	0.439	1377	ENSG00000103275.21	UBE2I	chr16	+	1312346	1312667	1312346	1312603	1314019	1314096	0.000155449	0.0107226	0.412,0.149	1.0,0.583
55165	ENSG00000132589.16	FLOT2	chr17	-	28885856	28885947	28883107	28883231	28888944	28889026	240	2.96347e-09	1.98903e-06	0.0,0.0	1.0,1.0	-1		6337	ENSG00000123136.15	DDX39A	chr19	-	14409741	14410334	14409741	14409981	14410215	14410334	383	5.90764e-06	0.000610223	1.0,1.0	0.539,0.609	0.426	4687	ENSG00000154358.23	OBSCN	chr1	+	228356150	228356344	228356150	228356193	228359596	228361250	0.00015514	0.0107226	0.628,0.554	1.0,0.866
4248	ENSG00000268362.6	CTD-2017D11.1	chr19	+	24048936	24049014	24046183	24046279	24049404	24049548	227	3.41511e-09	2.2103e-06	0.406,0.477	0.112,0.102	0.335		5489	ENSG00000005238.20	FAM214B	chr9	-	35107380	35108349	35107380	35107568	35108127	35108349	708	6.52271e-06	0.00064053	0.769,0.777	1.0,1.0	-0.227	2871	ENSG00000082684.16	SEMA5B	chr3	-	122913533	122913681	122913536	122913681	122913198	122913424	0.000170063	0.0110124	1.0,1.0	0.925,0.878
38302	ENSG00000105341.19	DMAC2	chr19	-	41433271	41433434	41431317	41432408	41433536	41433673	312	4.43317e-09	2.7055e-06	1.0,1.0	0.666,0.838	0.248		7672	ENSG00000111203.13	ITFG2	chr12	+	2817222	2817950	2817222	2817318	2817908	2817950	739	6.52354e-06	0.00064053	0.377,0.287	1.0,1.0	-0.668	4142	ENSG00000008128.23	CDK11A	chr1	-	1722587	1722831	1722707	1722831	1721595	1721711	0.000165259	0.0110124	0.0,0.0	0.356,0.156
50803	ENSG00000111206.13	FOXM1	chr12	-	2861298	2861412	2857682	2859663	2864319	2864495	263	4.37739e-09	2.7055e-06	0.0,0.0	1.0,1.0	-1		658	ENSG00000160117.16	ANKLE1	chr19	+	17282655	17283002	17282655	17282761	17282863	17283002	251	7.44693e-06	0.000701948	0.471,0.0	1.0,1.0	-0.764	4246	ENSG00000204344.15	STK19	chr6	+	31972620	31972919	31972620	31972757	31978902	31978998	0.000167211	0.0110124	1.0,0.489	0.193,0.0
51805	ENSG00000110074.11	FOXRED1	chr11	+	126272477	126272682	126269134	126269291	126272968	126273079	354	4.44706e-09	2.7055e-06	1.0,1.0	0.0,0.0	1		1881	ENSG00000204305.15	AGER	chr6	-	32183880	32184246	32183880	32183987	32184170	32184246	332	7.41789e-06	0.000701948	1.0,1.0	0.574,0.599	0.413	1918	ENSG00000206149.10	HERC2P9	chr15	+	28655272	28655691	28655272	28655420	28657186	28657325	0.00017819	0.011308	1.0,1.0	0.668,0.947
36994	ENSG00000157103.12	SLC6A1	chr3	+	11012598	11012762	10992747	10992929	11015671	11015733	313	4.53883e-09	2.70719e-06	0.0,0.137	1.0,1.0	-0.931		3883	ENSG00000167778.9	SPRYD3	chr12	-	53074648	53075219	53074648	53074784	53075094	53075219	459	9.37057e-06	0.000865951	0.0,0.0	1.0,0.394	-0.697	1885	ENSG00000168944.17	CEP120	chr5	-	123388303	123388606	123388431	123388606	123386517	123386667	0.000182511	0.011355	0.0,0.0	0.316,0.056
6227	ENSG00000183077.15	AFMID	chr17	+	78204827	78204900	78190969	78191060	78205945	78206050	222	4.9133e-09	2.76035e-06	0.0,0.0	1.0,1.0	-1		3166	ENSG00000215021.10	PHB2	chr12	-	6967170	6968021	6967170	6967238	6967891	6968021	802	1.10435e-05	0.00100093	1.0,1.0	0.925,0.734	0.17	6875	ENSG00000110756.18	HPS5	chr11	-	18321945	18322174	18322132	18322174	18311913	18312024	0.00018666	0.0113898	1.0,1.0	0.307,0.0
36733	ENSG00000090661.12	CERS4	chr19	+	8210682	8210862	8209302	8209494	8251075	8251249	329	4.86556e-09	2.76035e-06	0.475,0.185	1.0,1.0	-0.67		4218	ENSG00000005448.17	WDR54	chr2	+	74423318	74423982	74423318	74423385	74423854	74423982	618	1.21393e-05	0.00105534	0.057,0.399	0.659,1.0	-0.602	3824	ENSG00000197386.14	HTT	chr4	+	3129923	3130047	3129923	3129999	3130304	3130423	0.000240331	0.0143881	0.682,0.835	1.0,0.935
49945	ENSG00000170959.15	DCDC1	chr11	-	30882042	30883518	30881157	30881308	30892817	30892997	1625	4.99094e-09	2.76035e-06	0.128,0.171	1.0,1.0	-0.851		7274	ENSG00000103197.18	TSC2	chr16	+	2053341	2054440	2053341	2053452	2054295	2054440	992	1.20175e-05	0.00105534	0.412,0.524	1.0,0.86	-0.462	1932	ENSG00000183401.12	CCDC159	chr19	+	11346530	11346634	11346530	11346627	11349653	11349687	0.000259584	0.015253	0.56,0.241	1.0,0.851
61451	ENSG00000182087.14	TMEM259	chr19	-	1010990	1011095	1009647	1010895	1011366	1011499	254	4.80228e-09	2.76035e-06	0.0,0.0	1.0,1.0	-1		7308	ENSG00000110321.19	EIF4G2	chr11	-	10801660	10802209	10801660	10801774	10802048	10802209	423	1.23157e-05	0.00105534	0.015,0.016	0.033,0.029	-0.015	605	ENSG00000181896.12	ZNF101	chr19	+	19677863	19677990	19677863	19677986	19678725	19678786	0.000274438	0.0155498	0.745,0.0	1.0,1.0
4787	ENSG00000174652.20	ZNF266	chr19	-	9434797	9434859	9420064	9420218	9435107	9435193	211	5.9497e-09	3.23186e-06	0.0,0.0	1.0,0.761	-0.881		915	ENSG00000184009.13	ACTG1	chr17	-	81511187	81512142	81511187	81511626	81511902	81512142	425	1.73803e-05	0.00145075	0.025,0.022	0.037,0.037	-0.013	6292	ENSG00000137074.20	APTX	chr9	-	33001332	33001587	33001566	33001587	32989758	32989895	0.000272712	0.0155498	0.342,0.731	1.0,1.0
47992	ENSG00000189180.16	ZNF33A	chr10	+	38054374	38054511	38017290	38017386	38064087	38065088	286	6.26419e-09	3.34299e-06	1.0,1.0	0.0,0.0	1		2791	ENSG00000163913.13	IFT122	chr3	+	129514388	129515599	129514388	129514554	129515487	129515599	1082	1.78535e-05	0.00145075	0.569,0.616	0.222,0.204	0.38	3737	ENSG00000196876.18	SCN8A	chr12	+	51721545	51721941	51721545	51721908	51745902	51746035	0.000328171	0.0182682	0.141,0.0	0.621,0.621
13173	ENSG00000166526.18	ZNF3	chr7	-	100079535	100079572	100077302	100077433	100081634	100081709	186	6.44807e-09	3.38179e-06	1.0,1.0	0.0,0.348	0.826		6150	ENSG00000225470.8	JPX	chrX	+	73998767	74000496	73998767	73998844	73998953	74000496	258	1.77958e-05	0.00145075	0.055,0.0	0.366,0.669	-0.49	1597	ENSG00000173120.15	KDM2A	chr11	+	67250085	67250798	67250085	67250346	67252693	67252857	0.000353538	0.019341	0.834,0.943	1.0,1.0
49202	ENSG00000155511.18	GRIA1	chr5	+	153795475	153795590	153794620	153794735	153802355	153802490	264	6.91207e-09	3.5637e-06	0.653,1.0	0.0,0.0	0.827		8168	ENSG00000134905.17	CARS2	chr13	-	110645966	110647239	110645966	110646090	110647100	110647239	1159	1.87188e-05	0.00149528	0.239,0.459	0.72,1.0	-0.511	6650	ENSG00000198954.9	KIFBP	chr10	+	69005731	69007751	69005731	69005915	69008840	69008925	0.000373633	0.0200938	0.143,0.093	0.288,0.248
1670	ENSG00000100058.12	CRYBB2P1	chr22	+	25519922	25520162	25459415	25459515	25520681	25520854	389	8.0477e-09	4.01317e-06	0.087,0.0	0.754,1.0	-0.834		4961	ENSG00000100023.20	PPIL2	chr22	+	21694754	21695070	21694754	21694817	21694936	21695070	268	1.93978e-05	0.0015237	0.045,0.11	0.311,0.325	-0.24	416	ENSG00000125875.15	TBC1D20	chr20	-	437861	438841	438549	438841	437439	437598	0.000391007	0.0206777	0.733,0.941	1.0,1.0
11254	ENSG00000140416.23	TPM1	chr15	+	63061197	63061273	63060868	63060939	63061712	63061788	225	7.9354e-09	4.01317e-06	0.144,0.133	0.742,0.614	-0.539		6667	ENSG00000147813.16	NAPRT	chr8	-	143574784	143575093	143574784	143574900	143574985	143575093	234	2.10101e-05	0.00162329	0.614,0.459	1.0,1.0	-0.464	1762	ENSG00000162650.17	ATXN7L2	chr1	+	109486056	109486304	109486056	109486122	109486505	109486610	0.000422171	0.0216056	0.184,0.243	0.0,0.083
3160	ENSG00000171574.18	ZNF584	chr19	+	58409964	58410091	58408776	58409165	58415523	58415646	276	9.55482e-09	4.68787e-06	0.519,1.0	0.0,0.0	0.76		5831	ENSG00000155906.20	RMND1	chr6	-	151421244	151422605	151421244	151421321	151422540	151422605	1368	2.30698e-05	0.00175367	1.0,1.0	0.285,0.604	0.555	4126	ENSG00000171877.21	FRMD5	chr15	-	43885667	43885755	43885680	43885755	43884726	43884795	0.000420505	0.0216056	0.0,0.0	0.734,0.315
20767	ENSG00000114544.17	SLC41A3	chr3	-	126050897	126051050	126033606	126033678	126067946	126068246	302	1.17408e-08	5.66895e-06	0.198,0.228	1.0,1.0	-0.787		1547	ENSG00000184619.8	KRBA2	chr17	-	8371308	8372081	8371308	8371494	8371599	8372081	254	2.399e-05	0.00179468	0.578,0.638	1.0,0.891	-0.338	1537	ENSG00000104129.10	DNAJC17	chr15	-	40779083	40779310	40779222	40779310	40776541	40776627	0.000452323	0.0220803	0.463,0.408	0.0,0.147
10542	ENSG00000198901.14	PRC1	chr15	-	90969078	90969120	90966464	90966653	90969523	90969623	191	1.20709e-08	5.73726e-06	0.0,0.0	1.0,1.0	-1		2303	ENSG00000188002.10	RP11-43F13.1	chr5	-	1598919	1599827	1598919	1599269	1599626	1599827	506	2.58085e-05	0.00190055	0.306,0.469	1.0,1.0	-0.613	2488	ENSG00000183569.18	SERHL2	chr22	+	42571120	42571901	42571120	42571203	42572435	42572529	0.000445296	0.0220803	0.37,0.533	0.76,1.0
10501	ENSG00000257060.7	RP11-266O8.1	chr15	+	93496233	93496331	93322222	93322346	93530236	93530437	247	1.42424e-08	6.66524e-06	1.0,1.0	0.232,0.0	0.884		3909	ENSG00000075624.17	ACTB	chr7	-	5528280	5529400	5528280	5528719	5529160	5529400	590	2.63521e-05	0.00191073	0.019,0.018	0.03,0.028	-0.01	7024	ENSG00000175634.15	RPS6KB2	chr11	+	67432951	67433194	67432951	67433042	67433339	67433447	0.000451305	0.0220803	0.11,0.598	1.0,0.664
473	ENSG00000281566.3	RP11-485F13.1	chrX	+	98841940	98842001	98644527	98644574	98864610	98865564	210	1.8277e-08	8.35758e-06	0.169,0.347	1.0,1.0	-0.742		8364	ENSG00000204386.12	NEU1	chr6	-	31860438	31862191	31860438	31860621	31861998	31862191	1526	3.1288e-05	0.00223424	1.0,1.0	0.494,0.369	0.569	4886	ENSG00000109180.15	OCIAD1	chr4	+	48832619	48832761	48832619	48832682	48833400	48833481	0.00049172	0.0236398	0.02,0.0	0.17,0.094
3159	ENSG00000171574.18	ZNF584	chr19	+	58409940	58410091	58408648	58409165	58415523	58415646	300	1.84082e-08	8.35758e-06	0.498,1.0	0.0,0.0	0.749		6193	ENSG00000189056.15	RELN	chr7	-	103500744	103503230	103500744	103500922	103503015	103503230	2242	3.21525e-05	0.00226171	0.038,0.091	1.0,1.0	-0.935	759	ENSG00000105486.14	LIG1	chr19	-	48120166	48121322	48121169	48121322	48119136	48119190	0.000535442	0.0249847	0.76,1.0	0.652,0.41
60810	ENSG00000269893.8	SNHG8	chr4	+	118279106	118279137	118278754	118278792	118279388	118279431	180	1.99299e-08	8.91539e-06	0.0,0.383	1.0,1.0	-0.808		7854	ENSG00000092841.19	MYL6	chr12	+	56159586	56160148	56159586	56159730	56159974	56160148	393	3.46602e-05	0.00240226	0.03,0.037	0.072,0.077	-0.041	5681	ENSG00000158321.18	AUTS2	chr7	+	70766113	70766355	70766113	70766334	70771548	70771644	0.000532579	0.0249847	0.391,0.392	0.253,0.213
16274	ENSG00000148225.16	WDR31	chr9	-	113330983	113331116	113328880	113328955	113331906	113332050	282	2.27385e-08	1.00244e-05	0.0,0.346	1.0,1.0	-0.827		3900	ENSG00000288558.2	DUS4L-BCAP29	chr7	+	107563970	107564676	107563970	107564209	107564587	107564676	527	3.69512e-05	0.00252393	0.56,0.509	1.0,1.0	-0.466	5820	ENSG00000007372.24	PAX6	chr11	-	31801229	31801776	31801761	31801776	31800690	31800856	0.000553406	0.0254487	1.0,1.0	1.0,0.627
68202	ENSG00000115204.15	MPV17	chr2	-	27312993	27313154	27312679	27312772	27322447	27322522	310	2.50897e-08	1.09029e-05	0.49,0.445	1.0,1.0	-0.532		1296	ENSG00000131165.16	CHMP1A	chr16	-	89646526	89647331	89646526	89646733	89647202	89647331	618	4.46307e-05	0.00300492	1.0,1.0	0.42,0.491	0.544	5434	ENSG00000146414.16	SHPRH	chr6	-	145933049	145933178	145933056	145933178	145927188	145927277	0.000568742	0.0257803	0.05,0.039	0.156,0.287
67400	ENSG00000095794.19	CREM	chr10	+	35148367	35148491	35126840	35127193	35206894	35206952	273	2.84311e-08	1.21809e-05	1.0,1.0	0.489,0.12	0.696		5720	ENSG00000204256.14	BRD2	chr6	+	32976030	32976464	32976030	32976169	32976249	32976464	229	4.66915e-05	0.00309939	0.127,0.049	0.192,0.372	-0.194	4645	ENSG00000163516.14	ANKZF1	chr2	+	219230227	219230405	219230227	219230350	219231927	219232040	0.000601118	0.0264909	0.805,0.594	1.0,1.0
34857	ENSG00000117305.15	HMGCL	chr1	-	23814189	23814338	23808134	23808323	23816674	23816770	298	3.08212e-08	1.30215e-05	1.0,1.0	0.333,0.0	0.834		5261	ENSG00000167460.17	TPM4	chr19	+	16088026	16089120	16088026	16088097	16089044	16089120	1096	4.7603e-05	0.00311601	0.117,0.092	0.214,0.159	-0.082	7902	ENSG00000224078.15	SNHG14	chr15	+	25111764	25115656	25111764	25111894	25117409	25117515	0.00059806	0.0264909	0.93,0.789	1.0,0.959
68199	ENSG00000115204.15	MPV17	chr2	-	27312993	27313074	27312679	27312772	27322447	27322522	230	3.32997e-08	1.38759e-05	0.535,0.55	1.0,1.0	-0.458		7749	ENSG00000095906.17	NUBP2	chr16	+	1787940	1788207	1787940	1788051	1788137	1788207	235	5.32903e-05	0.00344051	0.036,0.0	0.297,0.297	-0.279	1145	ENSG00000205084.11	TMEM231	chr16	-	75545825	75545954	75545863	75545954	75545351	75545495	0.000616479	0.0267957	1.0,1.0	0.614,0.888
6208	ENSG00000087157.19	PGS1	chr17	+	78403567	78404089	78400676	78400855	78414878	78415027	671	3.40595e-08	1.40007e-05	0.25,0.437	1.0,1.0	-0.656		169	ENSG00000100416.15	TRMU	chr22	+	46355443	46357337	46355443	46355588	46356841	46357337	1402	5.66469e-05	0.00353428	0.489,0.475	1.0,1.0	-0.518	399	ENSG00000089063.15	TMEM230	chr20	-	5109157	5109445	5109331	5109445	5106187	5106310	0.000632709	0.0271141	0.009,0.009	0.027,0.044
68204	ENSG00000115204.15	MPV17	chr2	-	27317077	27317234	27312679	27312772	27322447	27322522	306	4.11256e-08	1.668e-05	0.098,0.351	1.0,1.0	-0.776		5915	ENSG00000214548.18	MEG3	chr14	+	100829033	100831534	100829033	100829749	100831420	100831534	1820	5.77423e-05	0.00353428	1.0,1.0	0.433,0.448	0.559	4370	ENSG00000223745.8	CCDC18-AS1	chr1	-	93345539	93345846	93345723	93345846	93340457	93340510	0.000640895	0.0271141	0.402,0.23	0.0,0.0
32333	ENSG00000127603.31	MACF1	chr1	+	39083362	39083417	39081315	39081543	39084166	39084438	204	4.60574e-08	1.84345e-05	0.068,0.477	1.0,1.0	-0.728		6172	ENSG00000123191.16	ATP7B	chr13	-	51957515	51960322	51957515	51957607	51960147	51960322	2689	5.65708e-05	0.00353428	1.0,1.0	0.437,0.571	0.496	200	ENSG00000130119.17	GNL3L	chrX	+	54539039	54539500	54539039	54539101	54540134	54540242	0.000715069	0.0277651	0.488,0.0	1.0,1.0
8978	ENSG00000177663.14	IL17RA	chr22	+	17105852	17105954	17105590	17105602	17107726	17107768	251	5.37896e-08	2.12497e-05	0.585,0.524	1.0,1.0	-0.446		8324	ENSG00000119688.21	ABCD4	chr14	-	74292747	74293248	74292747	74292869	74293153	74293248	433	5.70266e-05	0.00353428	0.52,0.401	0.802,0.782	-0.332	1237	ENSG00000177200.18	CHD9	chr16	+	53307680	53307953	53307680	53307905	53308685	53308854	0.000668248	0.0277651	0.575,0.528	0.712,0.93
1557	ENSG00000253352.10	TUG1	chr22	+	30972047	30972172	30971366	30971779	30972923	30973601	274	7.20419e-08	2.7799e-05	0.0,0.0	0.333,0.158	-0.245		7403	ENSG00000012171.20	SEMA3B	chr3	+	50273912	50274582	50273912	50274057	50274362	50274582	454	6.22166e-05	0.003737	0.535,0.33	0.076,0.0	0.395	1312	ENSG00000183426.17	NPIPA1	chr16	+	14948929	14949936	14948929	14949037	14950049	14950110	0.000705625	0.0277651	1.0,0.416	0.0,0.066
14138	ENSG00000076770.15	MBNL3	chrX	-	132381358	132381432	132379203	132379677	132382177	132382272	223	7.21958e-08	2.7799e-05	1.0,1.0	0.25,0.2	0.775		8240	ENSG00000172262.12	ZNF131	chr5	+	43161248	43161931	43161248	43161613	43161708	43161931	244	6.26402e-05	0.003737	0.55,0.895	1.0,1.0	-0.277	1947	ENSG00000168002.12	POLR2G	chr11	+	62761794	62762184	62761794	62761904	62762866	62763026	0.000689641	0.0277651	0.158,0.129	0.045,0.058
68339	ENSG00000100523.16	DDHD1	chr14	-	53051843	53051927	53036744	53046949	53054437	53054629	233	7.37105e-08	2.80275e-05	1.0,0.49	0.0,0.0	0.745		1256	ENSG00000108523.16	RNF167	chr17	+	4940486	4940993	4940486	4940726	4940922	4940993	345	6.41144e-05	0.00377714	0.968,1.0	0.776,0.812	0.19	2595	ENSG00000160145.16	KALRN	chr3	+	124395134	124395343	124395134	124395304	124398696	124398871	0.00068711	0.0277651	0.346,0.357	0.209,0.0
10244	ENSG00000007545.16	CRAMP1	chr16	+	1667334	1667400	1666421	1666600	1667961	1668193	215	7.59963e-08	2.81919e-05	0.691,0.634	1.0,0.959	-0.317		3691	ENSG00000110011.13	DNAJC4	chr11	+	64233893	64234281	64233893	64233980	64234072	64234281	241	6.92608e-05	0.00402995	0.534,0.553	0.236,0.0	0.426	3573	ENSG00000167778.9	SPRYD3	chr12	-	53074648	53075219	53075094	53075219	53073285	53073471	0.000700246	0.0277651	0.059,1.0	1.0,1.0
42119	ENSG00000164118.13	CEP44	chr4	+	174317334	174318665	174316165	174316290	174331481	174332293	1480	7.53084e-08	2.81919e-05	1.0,1.0	0.562,0.335	0.551		1636	ENSG00000177082.13	WDR73	chr15	-	84645972	84646348	84645972	84646085	84646183	84646348	247	7.7129e-05	0.00427658	1.0,1.0	0.731,0.828	0.221	5564	ENSG00000048052.23	HDAC9	chr7	+	18495745	18496023	18495745	18495854	18496261	18496324	0.000723136	0.0277651	0.872,0.901	0.632,0.552
14969	ENSG00000175471.19	MCTP1	chr5	-	94931952	94931991	94912805	94912976	94940083	94940195	188	7.85145e-08	2.87751e-05	1.0,1.0	0.442,0.241	0.658		7407	ENSG00000167992.13	VWCE	chr11	-	61291263	61291576	61291263	61291353	61291481	61291576	277	7.52342e-05	0.00427658	1.0,1.0	0.402,0.811	0.393	5792	ENSG00000106400.12	ZNHIT1	chr7	+	101218318	101221796	101218318	101218485	101222603	101222774	0.000726286	0.0277651	1.0,1.0	0.088,1.0
68201	ENSG00000115204.15	MPV17	chr2	-	27312993	27313109	27312679	27312772	27322447	27322522	265	8.15605e-08	2.95356e-05	0.59,0.515	1.0,1.0	-0.448		8184	ENSG00000104824.18	HNRNPL	chr19	-	38840095	38840559	38840095	38840376	38840487	38840559	260	7.71167e-05	0.00427658	0.089,0.079	0.223,0.15	-0.103	708	ENSG00000071564.17	TCF3	chr19	-	1631950	1632116	1632037	1632116	1627358	1627426	0.000748274	0.0281399	0.035,0.026	0.084,0.097
53507	ENSG00000089157.16	RPLP0	chr12	-	120198553	120198739	120197321	120197462	120198853	120199000	335	8.52075e-08	3.04933e-05	0.962,0.968	0.998,1.0	-0.034		8306	ENSG00000131876.17	SNRPA1	chr15	-	101285725	101287010	101285725	101285801	101286907	101287010	1255	7.5376e-05	0.00427658	0.797,0.582	1.0,1.0	-0.31	2234	ENSG00000159267.17	HLCS	chr21	-	36947332	36948287	36948165	36948287	36938831	36938994	0.000753828	0.0281399	1.0,0.255	1.0,1.0
3761	ENSG00000186567.13	CEACAM19	chr19	+	44678852	44678936	44676270	44676421	44680287	44680334	233	9.13975e-08	3.23282e-05	0.138,0.49	1.0,1.0	-0.686		7851	ENSG00000092841.19	MYL6	chr12	+	56158683	56159730	56158683	56158711	56159586	56159730	1024	8.01355e-05	0.00439161	0.184,0.177	0.308,0.307	-0.127	4593	ENSG00000138002.16	IFT172	chr2	-	27471232	27472362	27472249	27472362	27470927	27471095	0.00077517	0.0286002	0.338,0.219	0.685,0.804
66155	ENSG00000073060.17	SCARB1	chr12	-	124782682	124782811	124776855	124778586	124786356	124786503	278	9.88142e-08	3.45498e-05	0.349,0.341	0.0,0.082	0.304		861	ENSG00000101680.15	LAMA1	chr18	-	7042144	7043405	7042144	7042250	7043226	7043405	1125	8.13218e-05	0.0044054	0.079,0.037	0.114,0.179	-0.088	693	ENSG00000125734.15	GPR108	chr19	-	6735539	6735704	6735621	6735704	6734182	6734307	0.000864287	0.0309649	0.114,0.035	0.0,0.0
10382	ENSG00000161647.19	MPP3	chr17	-	43832076	43832251	43831881	43831943	43832760	43832819	324	1.02334e-07	3.53738e-05	0.155,0.558	1.0,1.0	-0.643		6407	ENSG00000155975.10	VPS37A	chr8	+	17280238	17280443	17280238	17280297	17280374	17280443	226	8.35506e-05	0.0044747	0.0,0.142	0.345,0.606	-0.404	960	ENSG00000131480.9	AOC2	chr17	+	42849085	42849371	42849085	42849290	42849600	42849730	0.000878299	0.0309649	0.819,1.0	0.0,1.0
42188	ENSG00000135931.19	ARMC9	chr2	+	231344974	231345090	231331792	231331897	231355797	231355934	265	1.05493e-07	3.60562e-05	0.158,0.158	1.0,1.0	-0.842		2202	ENSG00000188827.11	SLX4	chr16	-	3600978	3602307	3600978	3601191	3602117	3602307	1075	9.23609e-05	0.00489098	0.541,0.833	1.0,1.0	-0.313	4006	ENSG00000084764.12	MAPRE3	chr2	+	27024095	27024297	27024095	27024252	27025582	27025737	0.000873078	0.0309649	0.224,0.363	0.032,0.146
16419	ENSG00000141644.18	MBD1	chr18	-	50275369	50275444	50275128	50275245	50275599	50275728	224	1.16033e-07	3.92178e-05	0.622,0.642	0.909,0.918	-0.281		4067	ENSG00000132275.11	RRP8	chr11	-	6600925	6601602	6600925	6601055	6601148	6601602	242	0.000101717	0.00524552	0.755,0.48	0.0,0.133	0.551	6888	ENSG00000133895.18	MEN1	chr11	-	64810267	64810551	64810525	64810551	64809664	64810132	0.000849969	0.0309649	1.0,0.0	1.0,1.0
55262	ENSG00000288596.2	C8orf44	chr8	+	66677641	66677954	66667617	66667701	66679720	66681000	462	1.17832e-07	3.93884e-05	0.492,0.287	1.0,1.0	-0.611		8109	ENSG00000196517.13	SLC6A9	chr1	-	44000766	44001055	44000766	44000867	44000955	44001055	237	0.000102395	0.00524552	0.015,0.0	0.059,0.188	-0.116	5355	ENSG00000196632.10	WNK3	chrX	-	54238867	54239099	54239008	54239099	54238341	54238472	0.000899883	0.0313713	0.72,0.236	0.0,0.114
1014	ENSG00000285756.2	RP11-706O15.1	chrX	-	3822072	3822285	3818656	3818703	3822373	3822580	362	1.47011e-07	4.86079e-05	1.0,1.0	0.452,0.292	0.628		8263	ENSG00000213983.12	AP1G2	chr14	-	23565605	23566160	23565605	23565701	23565815	23566160	263	0.000101309	0.00524552	0.726,0.185	0.0,0.086	0.413	5822	ENSG00000007372.24	PAX6	chr11	-	31801560	31801776	31801761	31801776	31800690	31800856	0.0009096	0.0313713	1.0,1.0	1.0,0.713
15717	ENSG00000185619.18	PCGF3	chr4	+	732443	732498	730969	731110	733671	733789	204	1.62735e-07	5.32282e-05	0.0,0.034	0.143,0.15	-0.13		4368	ENSG00000067048.17	DDX3Y	chrY	+	12914883	12915227	12914883	12914982	12915066	12915227	233	0.000108813	0.00551436	0.561,0.193	0.719,1.0	-0.482	4078	ENSG00000161013.17	MGAT4B	chr5	-	179799505	179800068	179799953	179800068	179799202	179799250	0.000928765	0.0315294	1.0,1.0	0.454,1.0
28697	ENSG00000114948.13	ADAM23	chr2	+	206609909	206610000	206596050	206596162	206617578	206621127	240	1.70663e-07	5.52277e-05	0.554,1.0	0.0,0.0	0.777		8313	ENSG00000029364.12	SLC39A9	chr14	+	69458362	69462381	69458362	69458729	69461696	69462381	3116	0.000114101	0.00572085	0.733,0.965	1.0,1.0	-0.151	5923	ENSG00000082014.17	SMARCD3	chr7	-	151242464	151242603	151242480	151242603	151242136	151242232	0.000934058	0.0315294	0.0,0.0	0.441,0.0
28626	ENSG00000122008.15	POLK	chr5	+	75593877	75594049	75590343	75590440	75596221	75597178	321	1.78659e-07	5.55134e-05	0.285,0.63	1.0,1.0	-0.542		2067	ENSG00000135473.15	PAN2	chr12	-	56322614	56323209	56322614	56322758	56323061	56323209	452	0.000124404	0.00617177	1.0,1.0	0.569,0.397	0.517	3638	ENSG00000171202.7	TMEM126A	chr11	+	85654062	85654256	85654062	85654234	85655593	85655708	0.000994928	0.0328844	0.825,0.975	1.0,1.0
32003	ENSG00000161267.12	BDH1	chr3	-	197538305	197538952	197533488	197533561	197546360	197546486	796	1.78846e-07	5.55134e-05	1.0,1.0	0.158,0.0	0.921		5718	ENSG00000010278.15	CD9	chr12	+	6235475	6236275	6235475	6235565	6236191	6236275	775	0.000128734	0.00632005	0.0,0.041	0.278,0.435	-0.336	3771	ENSG00000164068.16	RNF123	chr3	+	49712478	49712892	49712478	49712656	49713512	49713587	0.000994061	0.0328844	0.017,0.094	0.195,0.307
61114	ENSG00000139734.19	DIAPH3	chr13	-	60132956	60132989	60112009	60112186	60163586	60163766	182	1.75439e-07	5.55134e-05	0.766,0.851	0.0,0.214	0.702		1632	ENSG00000140543.15	DET1	chr15	-	88530622	88531715	88530622	88531473	88531612	88531715	288	0.000153281	0.00741679	0.721,0.805	1.0,1.0	-0.237	5823	ENSG00000007372.24	PAX6	chr11	-	31801668	31801776	31801761	31801776	31800690	31800856	0.00101633	0.0332456	1.0,1.0	1.0,0.727
67411	ENSG00000095794.19	CREM	chr10	+	35188199	35188388	35127062	35127193	35206894	35207006	338	1.76912e-07	5.55134e-05	1.0,1.0	0.524,0.355	0.56		2082	ENSG00000113108.20	APBB3	chr5	-	140561586	140561849	140561586	140561722	140561843	140561849	270	0.000154221	0.00741679	0.705,0.809	1.0,1.0	-0.243	2900	ENSG00000148498.16	PARD3	chr10	-	34347955	34348115	34347964	34348115	34341626	34341816	0.00103996	0.0332819	0.147,0.148	0.358,0.248
1333	ENSG00000100354.21	TNRC6B	chr22	+	40281118	40281289	40279994	40280143	40285644	40285770	320	1.84909e-07	5.68157e-05	0.171,0.153	0.037,0.015	0.136		1544	ENSG00000167962.14	ZNF598	chr16	-	2002205	2002732	2002205	2002423	2002520	2002732	246	0.000159185	0.00750238	0.257,0.548	1.0,0.752	-0.473	2993	ENSG00000115266.12	APC2	chr19	+	1450148	1450338	1450148	1450330	1452983	1453142	0.00104296	0.0332819	0.655,0.559	1.0,0.913
69235	ENSG00000120647.10	CCDC77	chr12	+	405510	405564	389349	389486	411746	411978	203	1.92199e-07	5.84651e-05	1.0,1.0	0.268,0.461	0.635		7379	ENSG00000213619.11	NDUFS3	chr11	+	47579268	47580622	47579268	47579338	47580524	47580622	1335	0.00015874	0.00750238	1.0,1.0	0.711,0.387	0.451	6098	ENSG00000114745.14	GORASP1	chr3	-	39100746	39100877	39100787	39100877	39100304	39100503	0.00104891	0.0332819	1.0,0.955	0.785,0.932
61221	ENSG00000135362.14	PRR5L	chr11	+	36451208	36451335	36446299	36446440	36462341	36464965	276	2.04541e-07	6.16034e-05	0.519,0.213	1.0,1.0	-0.634		2893	ENSG00000108654.16	DDX5	chr17	-	64500548	64501143	64500548	64500773	64501056	64501143	432	0.000162729	0.00759348	0.907,0.924	0.988,0.989	-0.073	3549	ENSG00000157404.16	KIT	chr4	+	54725856	54726050	54725856	54726038	54727217	54727324	0.00112098	0.0352165	0.179,0.14	0.0,0.0
1972	ENSG00000183067.5	IGSF5	chr21	+	39788166	39788188	39779089	39779305	39792007	39792099	171	2.0779e-07	6.19684e-05	1.0,1.0	0.466,0.179	0.677		2813	ENSG00000150093.20	ITGB1	chr10	-	32920244	32922346	32920244	32920385	32922256	32922346	2020	0.000164963	0.00762228	0.02,0.031	0.054,0.043	-0.023	4380	ENSG00000106278.12	PTPRZ1	chr7	+	122010333	122013889	122010333	122011309	122019123	122019268	0.00116426	0.0362176	0.923,0.94	0.869,0.861
3521	ENSG00000010361.14	FUZ	chr19	-	49812637	49812736	49812250	49812335	49812995	49813175	248	2.32372e-07	6.76206e-05	0.5,0.311	1.0,1.0	-0.595		1365	ENSG00000125149.12	C16orf70	chr16	+	67132445	67132911	67132445	67132525	67132816	67132911	440	0.000171731	0.00785793	0.101,0.253	0.0,0.0	0.177	4702	ENSG00000214655.11	ZSWIM8	chr10	+	73800010	73800194	73800010	73800170	73800295	73800472	0.00120611	0.0371553	0.205,0.403	0.094,0.076
36798	ENSG00000139624.14	CERS5	chr12	-	50144768	50145061	50144348	50144364	50167100	50167369	442	2.36778e-07	6.76206e-05	1.0,1.0	0.252,0.0	0.874		2875	ENSG00000049167.16	ERCC8	chr5	-	60887439	60891086	60887439	60887520	60890888	60891086	3517	0.000189282	0.00857776	0.1,0.101	0.245,0.331	-0.188	1410	ENSG00000198901.14	PRC1	chr15	-	90969446	90969623	90969523	90969623	90969078	90969120	0.0012952	0.039166	1.0,1.0	0.822,0.822
40422	ENSG00000227388.3	RP11-112J3.16	chr9	+	35787864	35788036	35785459	35786775	35790155	35790316	321	2.36535e-07	6.76206e-05	1.0,1.0	0.134,0.317	0.774		1993	ENSG00000162650.17	ATXN7L2	chr1	+	109488846	109490128	109488846	109489100	109489929	109490128	978	0.000197594	0.00878548	1.0,0.77	0.578,0.379	0.407	5340	ENSG00000160392.14	C19orf47	chr19	-	40341785	40341890	40341838	40341890	40336319	40336407	0.00129607	0.039166	0.0,0.095	0.496,0.174
40593	ENSG00000168958.20	MFF	chr2	+	227342744	227342819	227340291	227340380	227352513	227352573	224	2.37017e-07	6.76206e-05	0.0,0.0	0.608,0.27	-0.439		6766	ENSG00000137074.20	APTX	chr9	-	32987543	32988129	32987543	32987842	32988078	32988129	385	0.000196609	0.00878548	0.326,0.162	0.0,0.0	0.244	7548	ENSG00000164970.15	FAM219A	chr9	-	34458203	34458552	34458236	34458552	34405864	34405964	0.00132361	0.0396208	0.772,0.863	0.938,0.981
50893	ENSG00000102290.23	PCDH11X	chrX	+	91809465	91809634	91779374	91779684	91810472	91810578	318	2.37858e-07	6.76206e-05	1.0,1.0	0.219,0.238	0.772		437	ENSG00000130724.9	CHMP2A	chr19	-	58551565	58551967	58551565	58551776	58551905	58551967	278	0.000221564	0.00958864	0.106,0.097	0.401,0.382	-0.29	4047	ENSG00000102908.22	NFAT5	chr16	+	69647027	69647586	69647027	69647167	69653235	69653428	0.00134053	0.0397524	1.0,1.0	0.605,1.0
53506	ENSG00000089157.16	RPLP0	chr12	-	120198553	120198631	120197321	120197462	120198853	120199000	227	2.46463e-07	6.9418e-05	0.054,0.147	0.724,1.0	-0.761		1653	ENSG00000140400.17	MAN2C1	chr15	-	75358461	75358808	75358461	75358618	75358703	75358808	234	0.000218686	0.00958864	0.298,0.269	0.091,0.072	0.202	130	ENSG00000101871.16	MID1	chrX	-	10566887	10567603	10567001	10567603	10523091	10523187	0.00144248	0.0419908	0.957,0.961	0.913,0.861
12801	ENSG00000167196.14	FBXO22	chr15	+	75904490	75904629	75903875	75904103	75913202	75913290	288	2.57948e-07	7.16869e-05	1.0,1.0	0.564,0.359	0.538		7931	ENSG00000072041.18	SLC6A15	chr12	-	84872601	84873328	84872601	84872794	84873086	84873328	441	0.000221761	0.00958864	0.0,0.101	0.22,0.753	-0.436	4196	ENSG00000177646.20	ACAD9	chr3	+	128879622	128880017	128879622	128879841	128884652	128884746	0.00143902	0.0419908	0.579,0.753	0.846,1.0
59978	ENSG00000175224.17	ATG13	chr11	+	46630044	46630100	46618259	46618375	46644278	46644360	205	2.59232e-07	7.16869e-05	0.421,0.377	1.0,1.0	-0.601		8335	ENSG00000009830.13	POMT2	chr14	-	77278728	77279928	77278728	77278869	77279536	77279928	816	0.000224096	0.0096015	0.85,1.0	0.543,0.57	0.369	5085	ENSG00000205726.15	ITSN1	chr21	+	33829005	33829168	33829005	33829050	33829623	33829745	0.001474	0.0425182	0.784,0.68	0.909,1.0
20917	ENSG00000173226.17	IQCB1	chr3	-	121772556	121772713	121769760	121770574	121781742	121781874	306	2.62449e-07	7.19229e-05	0.745,0.709	1.0,1.0	-0.273		2702	ENSG00000185513.17	L3MBTL1	chr20	+	43528656	43529368	43528656	43528745	43529202	43529368	606	0.000236545	0.0100436	0.551,1.0	0.269,0.109	0.587	2363	ENSG00000100897.18	DCAF11	chr14	+	24115381	24115749	24115381	24115726	24116916	24117044	0.00150143	0.0429194	1.0,0.924	0.684,0.827
756	ENSG00000102312.24	PORCN	chrX	+	48509423	48509707	48508965	48509103	48509783	48509956	433	2.98609e-07	8.11015e-05	0.292,0.256	1.0,1.0	-0.726		1833	ENSG00000196497.17	IPO4	chr14	-	24188343	24188638	24188343	24188423	24188551	24188638	277	0.000243035	0.0101259	0.402,0.227	0.0,0.119	0.255	589	ENSG00000105220.17	GPI	chr19	+	34381465	34381598	34381465	34381519	34393247	34393308	0.00158605	0.0449334	0.0,0.0	0.076,0.111
1933	ENSG00000160194.18	NDUFV3	chr21	+	42903181	42904276	42896926	42897047	42908863	42909105	1244	3.23495e-07	8.42006e-05	0.262,0.301	0.096,0.14	0.163		4468	ENSG00000117228.11	GBP1	chr1	-	89055112	89056228	89055112	89055215	89056015	89056228	949	0.000243082	0.0101259	0.44,0.32	1.0,1.0	-0.62	6274	ENSG00000176261.16	ZBTB8OS	chr1	-	32634701	32634792	32634767	32634792	32633950	32634072	0.00160732	0.044978	1.0,0.776	0.51,0.51
3519	ENSG00000010361.14	FUZ	chr19	-	49812446	49812736	49812250	49812335	49812995	49813299	439	3.21334e-07	8.42006e-05	0.312,0.253	1.0,1.0	-0.718		7746	ENSG00000095906.17	NUBP2	chr16	+	1786536	1786955	1786536	1786655	1786756	1786955	250	0.00024493	0.0101259	0.472,0.343	0.084,0.0	0.365	7277	ENSG00000151746.15	BICD1	chr12	+	32337498	32337816	32337498	32337706	32338785	32338979	0.00161598	0.044978	0.58,0.648	0.76,1.0
14119	ENSG00000249669.10	CARMN	chr5	+	149415520	149415917	149406877	149407078	149421480	149421601	546	3.23859e-07	8.42006e-05	0.375,0.193	1.0,1.0	-0.716		3811	ENSG00000109133.13	TMEM33	chr4	+	41935128	41935529	41935128	41935262	41935466	41935529	353	0.00024929	0.0102165	0.905,0.837	1.0,1.0	-0.129	2901	ENSG00000148498.16	PARD3	chr10	-	34347955	34348115	34347964	34348115	34346197	34346449	0.00164765	0.0454609	0.654,0.825	0.654,0.0
36734	ENSG00000090661.12	CERS4	chr19	+	8210705	8210862	8209312	8209494	8251075	8251171	306	3.20441e-07	8.42006e-05	0.661,0.289	1.0,1.0	-0.525		110	ENSG00000102312.24	PORCN	chrX	+	48512834	48514141	48512834	48512852	48514126	48514141	1423	0.000255521	0.010237	0.512,0.173	1.0,1.0	-0.657	7787	ENSG00000017260.20	ATP2C1	chr3	+	131001219	131001344	131001219	131001314	131016151	131016684	0.00170178	0.0465494	0.526,0.666	0.143,0.322
60102	ENSG00000138162.19	TACC2	chr10	+	122229345	122229486	122227836	122228008	122237394	122237538	290	3.20182e-07	8.42006e-05	0.162,0.227	0.0,0.0	0.195		971	ENSG00000130935.10	NOL11	chr17	+	67738121	67739010	67738121	67738355	67738931	67739010	725	0.000255026	0.010237	0.01,0.004	0.039,0.026	-0.026	5953	ENSG00000100296.14	THOC5	chr22	-	29528273	29528466	29528425	29528466	29528077	29528177	0.00184985	0.0501672	0.09,0.034	0.011,0.0
53395	ENSG00000079102.16	RUNX1T1	chr8	-	92062545	92062709	92017225	92017363	92095027	92095235	313	3.26642e-07	8.42043e-05	0.625,0.323	1.0,1.0	-0.526		4092	ENSG00000164068.16	RNF123	chr3	+	49712478	49713587	49712478	49712656	49713512	49713587	1005	0.000256304	0.010237	0.108,0.165	0.35,0.389	-0.233	1606	ENSG00000203875.13	SNHG5	chr6	-	85677953	85678748	85678135	85678748	85677423	85677492	0.00188756	0.0503378	0.31,1.0	1.0,1.0
14124	ENSG00000249669.10	CARMN	chr5	+	149423185	149423639	149421480	149421601	149424089	149424397	603	3.63115e-07	9.28201e-05	0.248,0.27	1.0,1.0	-0.741		5497	ENSG00000136531.19	SCN2A	chr2	+	165370125	165373347	165370125	165370299	165373224	165373347	3074	0.000263603	0.01044	1.0,1.0	1.0,0.088	0.456	5514	ENSG00000110046.13	ATG2A	chr11	-	64902509	64902680	64902515	64902680	64902259	64902386	0.00189506	0.0503378	0.366,0.265	0.719,1.0
5184	ENSG00000141682.12	PMAIP1	chr18	+	59900427	59900714	59900035	59900235	59902646	59902963	436	3.66759e-07	9.29703e-05	1.0,1.0	0.299,0.255	0.723		57	ENSG00000102393.14	GLA	chrX	-	101398369	101398946	101398369	101398567	101398784	101398946	366	0.000266381	0.0104621	0.066,0.075	0.188,0.232	-0.14	5706	ENSG00000223705.9	NSUN5P1	chr7	+	75415591	75415778	75415591	75415770	75415980	75416191	0.00190373	0.0503378	0.322,0.458	0.192,0.0
40103	ENSG00000171103.11	TRMT61B	chr2	-	28865016	28865119	28861117	28861308	28869578	28870295	252	3.72428e-07	9.36271e-05	1.0,1.0	0.372,0.639	0.494		4122	ENSG00000172771.12	EFCAB12	chr3	-	129402522	129404403	129402522	129402579	129404249	129404403	1819	0.000283412	0.011039	1.0,1.0	0.381,0.197	0.711	5649	ENSG00000138434.17	ITPRID2	chr2	+	181915215	181917005	181915215	181916427	181918597	181918675	0.00192175	0.0503943	0.353,0.381	0.699,0.58
466	ENSG00000281566.3	RP11-485F13.1	chrX	+	98578985	98579074	98573858	98573932	98644527	98644574	238	3.78703e-07	9.44243e-05	0.625,0.484	0.0,0.0	0.554		1509	ENSG00000103174.13	NAGPA	chr16	-	5027134	5027379	5027134	5027198	5027277	5027379	228	0.000305835	0.0118148	0.246,0.329	0.0,0.0	0.287	2896	ENSG00000148498.16	PARD3	chr10	-	34337274	34337426	34337277	34337426	34331116	34331344	0.00193837	0.0504134	1.0,1.0	1.0,0.45
57112	ENSG00000133030.22	MPRIP	chr17	+	17180606	17180669	17180002	17180088	17184822	17185560	212	4.28694e-07	0.00010602	0.534,0.448	0.195,0.243	0.272		2900	ENSG00000108654.16	DDX5	chr17	-	64503429	64503868	64503429	64503571	64503802	64503868	380	0.000323068	0.012379	0.13,0.047	0.253,0.225	-0.15	409	ENSG00000101365.21	IDH3B	chr20	-	2660029	2660176	2660067	2660176	2659698	2659793	0.00205566	0.0530293	0.956,1.0	0.749,0.898
63514	ENSG00000151067.23	CACNA1C	chr12	+	2633628	2633712	2611902	2612013	2634296	2634380	233	4.53536e-07	0.000111259	0.242,0.444	1.0,1.0	-0.657		8043	ENSG00000185163.10	DDX51	chr12	-	132140830	132141420	132140830	132141020	132141102	132141420	231	0.000330371	0.0125568	1.0,1.0	0.853,0.617	0.265	1650	ENSG00000154134.15	ROBO3	chr11	+	124877518	124877752	124877518	124877658	124877936	124878131	0.00208691	0.0534014	1.0,0.479	0.17,0.149
53464	ENSG00000168297.16	PXK	chr3	+	58412900	58412963	58410089	58410159	58424751	58425058	212	4.91071e-07	0.000119503	0.584,0.297	1.0,1.0	-0.559		0	ENSG00000012817.16	KDM5D	chrY	-	19706440	19706863	19706440	19706640	19706793	19706863	302	0.00034527	0.0130181	1.0,0.664	0.248,0.198	0.609	5484	ENSG00000115514.12	TXNDC9	chr2	-	99332983	99333242	99333021	99333242	99327534	99327653	0.00212171	0.0536822	0.443,0.705	0.21,0.0
58809	ENSG00000170322.15	NFRKB	chr11	-	129893296	129893385	129892714	129892870	129894358	129894438	238	5.00629e-07	0.000120862	0.715,0.653	0.0,0.0	0.684		3445	ENSG00000014914.21	MTMR11	chr1	-	149930364	149930965	149930364	149930547	149930791	149930965	393	0.000351942	0.0131643	0.213,1.0	0.275,0.0	0.469	7282	ENSG00000139116.19	KIF21A	chr12	-	39321347	39322882	39322667	39322882	39319905	39320013	0.00213172	0.0536822	0.062,0.11	0.141,0.224
36218	ENSG00000086015.22	MAST2	chr1	+	46000958	46000979	45997723	45997799	46002804	46002883	170	5.19334e-07	0.000124391	0.334,0.412	0.0,0.0	0.373		7073	ENSG00000082458.12	DLG3	chrX	+	70500470	70500989	70500470	70500580	70500897	70500989	466	0.000358551	0.0133059	0.149,0.074	0.012,0.0	0.105	4484	ENSG00000166881.10	NEMP1	chr12	-	57070673	57070893	57070819	57070893	57064645	57064739	0.00229319	0.0572936	0.744,0.71	1.0,0.863
42619	ENSG00000156787.17	TBC1D31	chr8	+	123134113	123134206	123130197	123130333	123140760	123140901	242	5.45155e-07	0.000129049	1.0,1.0	0.0,0.552	0.724		4992	ENSG00000119760.16	SUPT7L	chr2	-	27660983	27662281	27660983	27661601	27662178	27662281	726	0.000363604	0.0133472	1.0,0.937	0.636,0.879	0.211	47	ENSG00000101901.12	ALG13	chrX	+	111681169	111681424	111681169	111681299	111682131	111682294	0.00243821	0.0595887	0.449,0.266	0.521,1.0
50002	ENSG00000158321.18	AUTS2	chr7	+	70768023	70768068	70766113	70766334	70771548	70771644	194	5.47268e-07	0.000129049	0.588,0.545	0.362,0.318	0.227		6391	ENSG00000147180.17	ZNF711	chrX	+	85246929	85247651	85246929	85247183	85247546	85247651	512	0.000365327	0.0133472	1.0,0.9	0.744,0.727	0.214	1235	ENSG00000166971.17	AKTIP	chr16	-	53502699	53503206	53503146	53503206	53500217	53500329	0.00246017	0.0595887	0.286,0.5	0.077,0.077
16233	ENSG00000083857.14	FAT1	chr4	-	186590367	186590403	186588391	186589220	186595688	186595826	185	5.58413e-07	0.000129624	0.204,0.183	0.108,0.066	0.107		867	ENSG00000079134.12	THOC1	chr18	-	225088	225403	225088	225139	225336	225403	346	0.00038268	0.0138736	0.494,0.401	0.189,0.217	0.244	4477	ENSG00000197448.14	GSTK1	chr7	+	143264991	143265296	143264991	143265092	143267616	143267733	0.00242662	0.0595887	1.0,1.0	1.0,0.628
46826	ENSG00000144285.22	SCN1A	chr2	-	166077709	166077801	166073301	166073670	166127770	166128015	241	5.6675e-07	0.000129624	0.481,0.171	1.0,1.0	-0.674		4199	ENSG00000160753.16	RUSC1	chr1	+	155325101	155325490	155325101	155325178	155325315	155325490	286	0.000398112	0.0143229	0.207,0.172	1.0,0.701	-0.661	7756	ENSG00000092208.19	GEMIN2	chr14	+	39114305	39114475	39114305	39114395	39114828	39114913	0.00245729	0.0595887	0.929,0.745	1.0,1.0
54863	ENSG00000171045.16	TSNARE1	chr8	-	142279859	142280324	142274780	142274863	142284412	142284485	614	5.66563e-07	0.000129624	0.493,0.452	1.0,1.0	-0.527		417	ENSG00000101365.21	IDH3B	chr20	-	2659698	2660176	2659698	2659793	2660029	2660176	385	0.000408951	0.0145253	0.092,0.069	0.314,0.236	-0.195	5835	ENSG00000112282.18	MED23	chr6	-	131592387	131593171	131593005	131593171	131591312	131591527	0.0025187	0.0605442	0.817,1.0	0.576,0.649
64852	ENSG00000123411.15	IKZF4	chr12	+	56024661	56024905	56019319	56019415	56025053	56025158	393	5.60178e-07	0.000129624	1.0,1.0	0.275,0.532	0.597		640	ENSG00000105726.17	ATP13A1	chr19	-	19645197	19645790	19645197	19645532	19645646	19645790	263	0.000409901	0.0145253	0.232,0.221	0.0,0.061	0.196	696	ENSG00000167664.8	TMIGD2	chr19	-	4294566	4294680	4294578	4294680	4292231	4292885	0.00263072	0.0627615	0.481,1.0	0.0,0.0
29466	ENSG00000117616.18	RSRP1	chr1	-	25244453	25244498	25243549	25243633	25245149	25245301	194	5.85539e-07	0.000132922	0.324,0.658	1.0,1.0	-0.509		7639	ENSG00000137818.12	RPLP1	chr15	+	69453646	69455287	69453646	69453721	69455169	69455287	1597	0.000418441	0.0147172	0.018,0.021	0.035,0.044	-0.02	3116	ENSG00000128973.13	CLN6	chr15	-	68211648	68211863	68211674	68211863	68211262	68211318	0.00268841	0.0636591	0.0,0.039	0.116,0.136
21658	ENSG00000129682.16	FGF13	chrX	-	138857511	138857679	138708817	138708928	139204058	139204271	317	7.09937e-07	0.000159967	0.669,0.442	0.927,1.0	-0.408		6757	ENSG00000141002.20	TCF25	chr16	+	89904117	89905096	89904117	89904205	89904937	89905096	881	0.000429686	0.0150008	0.51,0.435	0.806,0.835	-0.348	2688	ENSG00000165275.10	TRMT10B	chr9	+	37763628	37763865	37763628	37763753	37768075	37768228	0.00272679	0.0640896	0.695,1.0	0.125,0.363
19070	ENSG00000068796.19	KIF2A	chr5	+	62372437	62372551	62366413	62366481	62373686	62373837	263	7.19161e-07	0.000160854	0.091,0.091	0.0,0.027	0.077		2109	ENSG00000007402.12	CACNA2D2	chr3	-	50364887	50365184	50364887	50364976	50365074	50365184	247	0.000442394	0.0151344	0.074,0.108	0.547,0.547	-0.456	1726	ENSG00000235823.3	OLMALINC	chr10	+	100373567	100374080	100373567	100374012	100381215	100381448	0.00283444	0.0653857	0.186,0.673	0.0,0.0
56171	ENSG00000107242.20	PIP5K1B	chr9	+	68742500	68742657	68705239	68705762	68818460	68818545	306	7.36988e-07	0.000163638	0.678,0.173	1.0,1.0	-0.575		2638	ENSG00000165795.24	NDRG2	chr14	-	21024029	21025061	21024029	21024096	21025028	21025061	1081	0.000443146	0.0151344	1.0,1.0	0.383,0.491	0.563	5084	ENSG00000103978.16	TMEM87A	chr15	-	42272888	42273078	42272962	42273078	42272062	42272123	0.00283307	0.0653857	1.0,0.0	1.0,1.0
57121	ENSG00000119397.18	CNTRL	chr9	+	121171407	121171548	121169610	121169816	121173242	121173509	290	8.34656e-07	0.000183981	0.673,0.375	1.0,1.0	-0.476		6220	ENSG00000007372.24	PAX6	chr11	-	31800690	31801776	31800690	31800856	31801761	31801776	1054	0.000442241	0.0151344	1.0,1.0	1.0,0.626	0.187	7265	ENSG00000111731.13	C2CD5	chr12	-	22519039	22519239	22519114	22519239	22518095	22518137	0.00284375	0.0653857	0.347,1.0	1.0,1.0
22897	ENSG00000065609.14	SNAP91	chr6	-	83614856	83614862	83610649	83610677	83616968	83617039	155	8.89901e-07	0.000194748	0.658,0.599	0.0,0.0	0.629		4012	ENSG00000008300.17	CELSR3	chr3	-	48639673	48641524	48639673	48640559	48641323	48641524	913	0.00045772	0.0154816	0.423,0.246	0.035,0.052	0.291	4029	ENSG00000153208.17	MERTK	chr2	+	111929119	111929540	111929119	111929304	111944959	111945060	0.00291435	0.0665269	1.0,1.0	0.608,0.659
8110	ENSG00000166579.16	NDEL1	chr17	+	8443926	8444176	8435921	8436045	8444259	8444357	399	9.58996e-07	0.000208369	0.691,0.272	1.0,1.0	-0.518		4942	ENSG00000118046.16	STK11	chr19	+	1221212	1222006	1221212	1221340	1221948	1222006	757	0.000459883	0.0154816	0.017,0.0	0.096,0.016	-0.048	4566	ENSG00000197694.18	SPTAN1	chr9	+	128624327	128624824	128624327	128624487	128625102	128625179	0.00296821	0.0672724	0.016,0.019	0.022,0.053
32794	ENSG00000136068.16	FLNB	chr3	+	58141857	58141929	58138281	58138529	58142649	58142752	221	9.93158e-07	0.000214261	0.503,0.522	0.151,0.126	0.374		5821	ENSG00000070404.10	FSTL3	chr19	+	681332	681771	681332	681560	681649	681771	238	0.000482629	0.0161321	0.162,0.2	0.0,0.0	0.181	5144	ENSG00000135451.13	TROAP	chr12	+	49330144	49330943	49330144	49330573	49331213	49331407	0.0030707	0.068615	1.0,1.0	0.873,0.852
38947	ENSG00000168679.18	SLC16A4	chr1	-	110382833	110382966	110381651	110381795	110389236	110389355	282	1.04214e-06	0.000221685	0.514,0.0	1.0,1.0	-0.743		3279	ENSG00000128159.12	TUBGCP6	chr22	-	50219956	50221874	50219956	50220015	50220250	50221874	384	0.000494492	0.0164123	1.0,1.0	1.0,0.0	0.5	5159	ENSG00000109756.9	RAPGEF2	chr4	+	159351058	159351181	159351058	159351133	159352684	159352910	0.00306249	0.068615	0.245,0.274	0.773,0.602
46827	ENSG00000144285.22	SCN1A	chr2	-	166077709	166077847	166073357	166073670	166127770	166128015	287	1.03572e-06	0.000221685	0.342,0.257	1.0,1.0	-0.701		767	ENSG00000077463.15	SIRT6	chr19	-	4175027	4175760	4175027	4175111	4175679	4175760	717	0.000507056	0.0167116	0.73,0.705	1.0,1.0	-0.282	1135	ENSG00000176715.17	ACSF3	chr16	+	89093851	89093996	89093851	89093992	89098590	89098763	0.00315811	0.0700748	0.773,1.0	0.327,0.773
36145	ENSG00000070371.16	CLTCL1	chr22	-	19208153	19208311	19201328	19201493	19208921	19209114	307	1.13464e-06	0.000239684	1.0,1.0	0.327,0.493	0.59		1584	ENSG00000140983.14	RHOT2	chr16	+	670891	671203	670891	671000	671114	671203	263	0.000517973	0.0168359	1.0,1.0	0.943,0.739	0.159	6470	ENSG00000143207.21	COP1	chr1	-	176163814	176163891	176163826	176163891	176162868	176162988	0.00333035	0.0733834	0.725,0.852	0.581,0.601
6416	ENSG00000069188.17	SDK2	chr17	-	73380893	73380950	73379447	73379549	73383875	73384011	206	1.21456e-06	0.000253054	0.42,0.783	0.0,0.0	0.602		8431	ENSG00000224078.15	SNHG14	chr15	+	25111764	25117515	25111764	25111894	25117409	25117515	5664	0.000516461	0.0168359	0.922,0.75	1.0,0.952	-0.14	2876	ENSG00000168101.14	NUDT16L1	chr16	+	4693977	4694308	4693977	4694238	4694957	4695859	0.00335902	0.0735047	0.097,0.089	0.0,0.043
53757	ENSG00000241852.10	C8orf58	chr8	+	22602560	22602643	22602199	22602312	22603194	22604133	232	1.21106e-06	0.000253054	0.507,0.391	1.0,1.0	-0.551		5865	ENSG00000114786.16	ABHD14A-ACY1	chr3	+	51986604	51987061	51986604	51986661	51986987	51987061	475	0.000523529	0.0168999	1.0,1.0	1.0,0.073	0.464	3231	ENSG00000111445.14	RFC5	chr12	+	118017689	118018053	118017689	118017815	118019071	118019136	0.00345846	0.0746509	1.0,1.0	0.802,0.658
26961	ENSG00000169241.19	SLC50A1	chr1	+	155136827	155136951	155136298	155136376	155137978	155138098	273	1.24017e-06	0.000254898	0.0,0.154	0.645,1.0	-0.746		4019	ENSG00000115286.20	NDUFS7	chr19	+	1388524	1388938	1388524	1388593	1388832	1388938	388	0.000530823	0.0169398	0.048,0.085	0.023,0.0	0.055	6251	ENSG00000236404.11	VLDLR-AS1	chr9	-	2506358	2506540	2506418	2506540	2503269	2503403	0.00344909	0.0746509	1.0,1.0	1.0,0.0
49999	ENSG00000158321.18	AUTS2	chr7	+	70435751	70435781	70134535	70134571	70698568	70698620	179	1.23239e-06	0.000254898	1.0,1.0	0.571,0.526	0.452		7627	ENSG00000172269.20	DPAGT1	chr11	-	119097141	119098043	119097141	119097297	119097854	119098043	706	0.000531953	0.0169398	0.487,0.559	1.0,1.0	-0.477	654	ENSG00000130175.10	PRKCSH	chr19	+	11435634	11435710	11435634	11435706	11436040	11436196	0.00350169	0.0750734	0.173,0.302	0.245,0.0
30389	ENSG00000126106.14	TMEM53	chr1	-	44660173	44660295	44645359	44645464	44674330	44674402	271	1.25562e-06	0.00025634	0.794,1.0	0.216,0.155	0.712		6801	ENSG00000165282.14	PIGO	chr9	-	35091239	35092767	35091239	35091291	35092542	35092767	1400	0.000545553	0.0172563	0.868,1.0	0.698,0.696	0.237	3594	ENSG00000288558.2	DUS4L-BCAP29	chr7	+	107563970	107564676	107563970	107564209	107567049	107567186	0.0036393	0.0769832	1.0,1.0	1.0,0.377
66817	ENSG00000170919.16	TPT1-AS1	chr13	+	45390713	45390858	45389734	45389820	45391031	45391548	294	1.29949e-06	0.000263529	1.0,1.0	0.403,0.403	0.597		4969	ENSG00000084754.12	HADHA	chr2	-	26190654	26191628	26190654	26191395	26191482	26191628	236	0.000556133	0.0174737	0.059,0.026	0.122,0.177	-0.107	5293	ENSG00000123983.15	ACSL3	chr2	+	222927016	222927242	222927016	222927189	222928861	222928936	0.00361965	0.0769832	0.133,0.044	0.034,0.017
29103	ENSG00000138380.18	CARF	chr2	+	202974333	202974496	202971504	202971738	202977268	202977332	312	1.50236e-06	0.000301961	1.0,1.0	0.323,0.323	0.677		7421	ENSG00000255508.7	RP11-864I4.1	chr11	-	62572583	62574908	62572583	62572742	62574676	62574908	2083	0.000572886	0.0178809	0.233,1.0	1.0,1.0	-0.383	6153	ENSG00000108465.15	CDK5RAP3	chr17	+	47973518	47973696	47973518	47973693	47973930	47974031	0.00378706	0.0795784	0.0,0.0	0.0,0.353
31183	ENSG00000117139.18	KDM5B	chr1	-	202766925	202767051	202764048	202764145	202773117	202773288	275	1.50886e-06	0.000301961	0.265,0.52	1.0,1.0	-0.607		6909	ENSG00000100949.15	RABGGTA	chr14	-	24266429	24266889	24266429	24266517	24266775	24266889	407	0.000581239	0.0180222	0.346,0.222	0.0,0.084	0.242	1851	ENSG00000136261.15	BZW2	chr7	+	16646133	16646304	16646133	16646288	16665436	16665501	0.00398084	0.0831001	0.11,0.07	0.26,0.345
11126	ENSG00000157890.18	MEGF11	chr15	-	65916827	65916956	65916147	65916276	65917965	65918094	278	1.66039e-06	0.000326621	0.349,0.0	1.0,1.0	-0.826		4494	ENSG00000111640.15	GAPDH	chr12	+	6536683	6537010	6536683	6536790	6536919	6537010	278	0.000599101	0.0184547	0.011,0.007	0.018,0.02	-0.01	6575	ENSG00000048740.18	CELF2	chr10	+	11314138	11314270	11314138	11314258	11321188	11321386	0.00402822	0.0835395	0.481,0.156	1.0,0.481
14266	ENSG00000156398.13	SFXN2	chr10	+	102729318	102729394	102728430	102728529	102729722	102729808	225	1.6643e-06	0.000326621	0.227,0.398	0.768,1.0	-0.572		7165	ENSG00000168566.13	SNRNP48	chr6	+	7599672	7601524	7599672	7599680	7601335	7601524	1804	0.000633144	0.0193767	0.726,0.593	1.0,1.0	-0.341	1460	ENSG00000213614.11	HEXA	chr15	-	72353067	72355624	72355558	72355624	72351132	72351234	0.00405542	0.0835574	1.0,0.717	0.598,0.45
69337	ENSG00000224078.15	SNHG14	chr15	+	25079825	25080079	25078861	25078995	25081090	25081183	403	1.65675e-06	0.000326621	0.776,0.709	1.0,0.936	-0.226		1527	ENSG00000162066.16	AMDHD2	chr16	+	2528451	2528718	2528451	2528559	2528649	2528718	239	0.000638426	0.0194123	0.652,0.0	1.0,0.714	-0.531	2641	ENSG00000184014.9	DENND5A	chr11	-	9142721	9144278	9144096	9144278	9141939	9142108	0.00418641	0.0856999	0.919,0.926	0.666,0.734
20768	ENSG00000114544.17	SLC41A3	chr3	-	126050942	126051050	126033603	126033678	126067946	126068180	257	1.70562e-06	0.000332585	0.647,0.511	1.0,1.0	-0.421		6354	ENSG00000082014.17	SMARCD3	chr7	-	151242136	151242603	151242136	151242232	151242464	151242603	381	0.00064408	0.0194586	1.0,1.0	0.309,1.0	0.346	7780	ENSG00000138780.15	GSTCD	chr4	+	105717592	105718039	105717592	105717778	105719059	105719527	0.00440387	0.0895737	0.825,1.0	0.766,0.61
33908	ENSG00000114098.18	ARMC8	chr3	+	138188400	138188530	138187317	138187599	138221925	138221997	279	1.72702e-06	0.000334613	0.0,0.0	0.445,1.0	-0.723		1339	ENSG00000132604.11	TERF2	chr16	-	69368375	69368595	69368375	69368482	69368586	69368595	253	0.000659014	0.0195342	1.0,1.0	0.673,0.469	0.429	2331	ENSG00000131143.10	COX4I1	chr16	+	85804936	85805153	85804936	85805104	85805732	85805864	0.00445266	0.0899891	0.131,1.0	1.0,1.0
2212	ENSG00000215386.13	MIR99AHG	chr21	+	16564773	16564809	16537378	16537439	16589352	16590252	185	1.75347e-06	0.000337588	0.547,1.0	0.0,0.0	0.774		1421	ENSG00000103496.15	STX4	chr16	+	31034203	31034536	31034203	31034325	31034461	31034536	285	0.000657349	0.0195342	0.0,0.0	0.095,0.148	-0.121	1710	ENSG00000145979.18	TBC1D7	chr6	-	13328295	13328531	13328315	13328531	13326786	13326906	0.00467507	0.0932955	0.306,0.0	0.469,0.306
53399	ENSG00000079102.16	RUNX1T1	chr8	-	92075964	92076137	92017225	92017363	92095027	92095171	322	1.79813e-06	0.000344009	0.698,0.501	1.0,1.0	-0.401		3612	ENSG00000137207.12	YIPF3	chr6	-	43513068	43513451	43513068	43513200	43513358	43513451	307	0.00065702	0.0195342	0.133,0.037	0.013,0.029	0.064	5253	ENSG00000170852.11	KBTBD2	chr7	-	32879434	32879942	32879700	32879942	32874991	32875157	0.00466105	0.0932955	0.798,0.828	1.0,0.932
41932	ENSG00000147576.17	ADHFE1	chr8	+	66445217	66445414	66444593	66444748	66447263	66447341	346	1.84356e-06	0.000350495	0.463,0.301	1.0,1.0	-0.618		431	ENSG00000125875.15	TBC1D20	chr20	-	440247	441689	440247	440317	441587	441689	1419	0.000667989	0.0196187	0.739,0.409	0.837,1.0	-0.345	2093	ENSG00000137094.16	DNAJB5	chr9	+	34990498	34990812	34990498	34990611	34993199	34993444	0.00478007	0.0947949	1.0,1.0	1.0,0.39
28904	ENSG00000049323.16	LTBP1	chr2	+	33342837	33342963	33315143	33315269	33347366	33347409	275	2.19968e-06	0.000415603	0.503,0.52	0.138,0.182	0.352		1163	ENSG00000177731.16	FLII	chr17	-	18245554	18246062	18245554	18245660	18245743	18246062	232	0.00067019	0.0196187	0.0,0.204	0.763,0.391	-0.475	481	ENSG00000104852.15	SNRNP70	chr19	+	49102113	49102185	49102113	49102173	49104633	49104735	0.00483312	0.0952515	0.481,1.0	0.735,0.0
56849	ENSG00000165029.17	ABCA1	chr9	-	104884426	104884568	104883038	104883157	104889101	104889195	291	2.25206e-06	0.000422873	0.571,0.506	1.0,1.0	-0.462		6130	ENSG00000114857.18	NKTR	chr3	+	42627199	42630575	42627199	42627227	42630545	42630575	3467	0.000694131	0.0200702	0.938,1.0	0.825,0.842	0.136	2031	ENSG00000113504.21	SLC12A7	chr5	-	1075890	1076236	1076137	1076236	1075370	1075490	0.00490452	0.096062	0.143,0.22	0.111,0.0
941	ENSG00000182287.15	AP1S2	chrX	-	15831451	15831568	15828191	15828200	15845378	15845516	266	2.30446e-06	0.000427435	0.0,0.041	0.309,0.329	-0.298		7918	ENSG00000087460.29	GNAS	chr20	+	58903671	58905480	58903671	58903791	58905382	58905480	1740	0.000691294	0.0200702	0.011,0.011	0.026,0.014	-0.009	879	ENSG00000108506.13	INTS2	chr17	-	61927653	61927982	61927921	61927982	61926351	61926662	0.00526037	0.101775	1.0,0.263	1.0,1.0
5053	ENSG00000175221.15	MED16	chr19	-	889637	889807	885769	886201	890136	890244	319	2.29653e-06	0.000427435	0.637,0.603	1.0,1.0	-0.38		7489	ENSG00000172732.12	MUS81	chr11	+	65864719	65865145	65864719	65864815	65865016	65865145	350	0.000705264	0.0202677	0.362,0.294	0.695,0.507	-0.273	896	ENSG00000006282.21	SPATA20	chr17	+	50550997	50551222	50550997	50551190	50551510	50551679	0.00523059	0.101775	1.0,0.121	0.0,0.171
2689	ENSG00000197122.12	SRC	chr20	+	37386459	37386477	37386074	37386174	37393894	37393993	167	2.33694e-06	0.000428512	0.182,0.442	0.0,0.0	0.312		2625	ENSG00000163945.19	UVSSA	chr4	+	1383765	1388049	1383765	1383940	1385867	1388049	2076	0.000732584	0.0209253	1.0,0.437	1.0,1.0	-0.281	1605	ENSG00000203875.13	SNHG5	chr6	-	85677794	85678188	85678135	85678188	85677423	85677492	0.0054211	0.102883	0.773,1.0	1.0,1.0
9746	ENSG00000102897.10	LYRM1	chr16	+	20902485	20902717	20900665	20900889	20920121	20920214	381	2.33844e-06	0.000428512	1.0,1.0	0.343,0.37	0.643		4258	ENSG00000127054.21	INTS11	chr1	-	1313034	1313592	1313034	1313124	1313508	1313592	533	0.000745313	0.0211606	0.038,0.137	0.043,0.005	0.064	1719	ENSG00000154265.16	ABCA5	chr17	-	69273942	69274128	69273958	69274128	69271161	69271289	0.00535396	0.102883	0.0,0.184	0.153,0.419
14870	ENSG00000206149.10	HERC2P9	chr15	+	28655795	28656026	28655272	28655420	28657186	28657325	380	2.37398e-06	0.000432419	1.0,1.0	0.116,0.733	0.576		9	ENSG00000130826.18	DKC1	chrX	+	154774601	154775273	154774601	154774705	154775194	154775273	638	0.000756647	0.0211609	0.318,0.0	0.0,0.0	0.159	1727	ENSG00000235823.3	OLMALINC	chr10	+	100373567	100374134	100373567	100374012	100381215	100381448	0.00543055	0.102883	0.155,0.623	0.0,0.0
10500	ENSG00000257060.7	RP11-266O8.1	chr15	+	93483090	93483228	93373509	93373585	93496233	93496331	287	2.5074e-06	0.000454003	1.0,1.0	0.609,0.148	0.621		4684	ENSG00000197841.15	ZNF181	chr19	+	34739147	34739621	34739147	34739268	34739525	34739621	406	0.000758794	0.0211609	0.423,1.0	0.155,0.423	0.423	7674	ENSG00000147133.17	TAF1	chrX	+	71423116	71423264	71423116	71423239	71423973	71424066	0.00544732	0.102883	0.255,0.097	0.097,0.0
3520	ENSG00000010361.14	FUZ	chr19	-	49812614	49812736	49812250	49812335	49812995	49813156	271	2.56596e-06	0.000460893	0.668,0.407	1.0,1.0	-0.463		5965	ENSG00000136003.16	ISCU	chr12	+	108564059	108564392	108564059	108564155	108564278	108564392	272	0.000758107	0.0211609	0.451,0.0	1.0,1.0	-0.774	6721	ENSG00000107521.20	HPS1	chr10	-	98433939	98434091	98433982	98434091	98431130	98431291	0.00552311	0.103697	0.0,0.0	0.437,1.0
30513	ENSG00000181555.21	SETD2	chr3	-	47080800	47081083	47067069	47067118	47083719	47083946	432	2.57575e-06	0.000460893	0.0,0.027	0.193,0.134	-0.15		432	ENSG00000125875.15	TBC1D20	chr20	-	440247	441689	440247	440389	441587	441689	1347	0.000766444	0.0212485	0.214,0.24	0.068,0.1	0.143	1550	ENSG00000198826.11	ARHGAP11A	chr15	+	32629594	32629762	32629594	32629675	32632978	32633108	0.00557078	0.103977	1.0,0.863	0.558,0.879
19055	ENSG00000076321.11	KLHL20	chr1	+	173715522	173715654	173714940	173715078	173716002	173716066	281	2.67493e-06	0.00047584	0.614,0.614	0.191,0.0	0.518		7733	ENSG00000168255.20	POLR2J3	chr7	-	102566996	102568184	102566996	102567083	102568009	102568184	1075	0.00078082	0.0215205	1.0,1.0	0.294,0.357	0.674	1347	ENSG00000131652.14	THOC6	chr16	+	3025923	3026166	3025923	3025988	3026250	3026288	0.00569499	0.105674	0.533,1.0	1.0,1.0
19445	ENSG00000114867.22	EIF4G1	chr3	+	184315488	184315545	184314501	184314674	184315762	184315856	206	2.82966e-06	0.000500438	0.868,0.88	1.0,1.0	-0.126		1402	ENSG00000169733.12	RFNG	chr17	-	82047901	82049116	82047901	82048807	82049030	82049116	372	0.000792892	0.0217262	0.114,0.07	0.034,0.0	0.075	7590	ENSG00000231607.13	DLEU2	chr13	-	50044639	50044768	50044650	50044768	50029277	50029492	0.00577489	0.106533	0.651,0.482	0.0,0.0
40694	ENSG00000170899.11	GSTA4	chr6	-	52987356	52987408	52984463	52984605	52994156	52994261	201	2.93786e-06	0.000516571	1.0,1.0	0.527,0.426	0.523		6296	ENSG00000133606.11	MKRN1	chr7	-	140455094	140455900	140455094	140455233	140455789	140455900	705	0.000804635	0.0219205	1.0,1.0	1.0,0.524	0.238	1204	ENSG00000172831.14	CES2	chr16	+	66942647	66942785	66942647	66942737	66943298	66943371	0.00583349	0.106992	1.0,0.752	0.532,0.726
43873	ENSG00000157625.15	TAB3	chrX	-	30845932	30846071	30842987	30843049	30846550	30846644	288	3.01971e-06	0.000527912	0.0,0.0	0.509,0.206	-0.357		92	ENSG00000072506.14	HSD17B10	chrX	-	53431260	53431906	53431260	53431594	53431797	53431906	352	0.000857821	0.0220924	0.055,0.075	0.0,0.012	0.059	473	ENSG00000010361.14	FUZ	chr19	-	49812446	49812736	49812637	49812736	49812250	49812335	0.00622822	0.112914	0.305,0.467	1.0,0.305
16087	ENSG00000105136.21	ZNF419	chr19	+	57490146	57490185	57487717	57487983	57491470	57491597	188	3.27934e-06	0.000570023	1.0,0.346	0.0,0.0	0.673		1847	ENSG00000174177.13	CTU2	chr16	+	88714382	88714737	88714382	88714486	88714586	88714737	249	0.000837103	0.0220924	0.499,0.056	0.0,0.0	0.278	677	ENSG00000142303.14	ADAMTS10	chr19	-	8595761	8595903	8595772	8595903	8592762	8592870	0.00628046	0.112914	1.0,1.0	0.788,0.0
41431	ENSG00000048405.10	ZNF800	chr7	-	127386059	127386155	127377185	127377329	127391496	127391615	245	3.55424e-06	0.000614298	0.709,0.774	1.0,0.951	-0.234		2076	ENSG00000164620.9	RELL2	chr5	+	141636949	141638409	141636949	141637741	141638169	141638409	577	0.000851372	0.0220924	1.0,0.508	0.437,0.079	0.496	2507	ENSG00000163660.12	CCNL1	chr3	-	157157006	157157083	157157010	157157083	157153035	157153156	0.00629872	0.112914	0.109,0.122	0.0,0.0
29987	ENSG00000189298.14	ZKSCAN3	chr6	+	28359524	28359988	28349946	28350067	28361323	28361471	613	3.59184e-06	0.000615601	0.422,0.245	1.0,1.0	-0.666		2333	ENSG00000185813.11	PCYT2	chr17	-	81905669	81906177	81905669	81905735	81906099	81906177	513	0.0008323	0.0220924	0.068,0.083	0.017,0.0	0.067	7613	ENSG00000107959.17	PITRM1	chr10	-	3171760	3172782	3172181	3172782	3170103	3170206	0.00619513	0.112914	1.0,0.148	1.0,1.0
41572	ENSG00000178568.15	ERBB4	chr2	-	211657949	211657994	211630461	211630594	211665322	211665354	194	3.60225e-06	0.000615601	0.697,0.235	1.0,1.0	-0.534		2514	ENSG00000011143.19	MKS1	chr17	-	58214740	58216243	58214740	58214898	58216087	58216243	1338	0.000857433	0.0220924	1.0,0.069	1.0,1.0	-0.466	2978	ENSG00000117054.15	ACADM	chr1	+	75750450	75750891	75750450	75750546	75761121	75761370	0.00638198	0.113129	0.015,0.232	0.0,0.0
21988	ENSG00000163681.16	SLMAP	chr3	+	57907883	57908006	57896872	57896932	57909075	57909150	272	3.74011e-06	0.000635589	1.0,1.0	0.722,0.578	0.35		5069	ENSG00000138398.17	PPIG	chr2	+	169630773	169631933	169630773	169630987	169631774	169631933	936	0.000841877	0.0220924	1.0,0.69	0.443,0.509	0.369	6681	ENSG00000146223.16	RPL7L1	chr6	+	42880860	42881082	42880860	42880966	42883450	42883614	0.00638085	0.113129	0.771,0.428	0.138,0.219
13074	ENSG00000146112.12	PPP1R18	chr6	-	30684407	30686046	30679178	30679389	30687113	30687216	1788	3.76299e-06	0.000635925	1.0,1.0	0.704,0.797	0.25		6807	ENSG00000198467.16	TPM2	chr9	-	35684487	35685139	35684487	35684550	35685063	35685139	662	0.000825246	0.0220924	0.252,0.245	0.802,0.594	-0.449	1091	ENSG00000258315.5	C17orf49	chr17	+	7016494	7016685	7016494	7016525	7017256	7017520	0.00647487	0.114137	0.897,0.887	1.0,1.0
11989	ENSG00000104044.16	OCA2	chr15	-	27990575	27990647	27989600	27989666	28014775	28014929	221	3.90544e-06	0.000653543	0.252,0.0	1.0,1.0	-0.874		6820	ENSG00000197912.16	SPG7	chr16	+	89545871	89546181	89545871	89546030	89546131	89546181	250	0.000851684	0.0220924	0.795,0.736	1.0,1.0	-0.234	6158	ENSG00000157193.18	LRP8	chr1	-	53271226	53275753	53275630	53275753	53271027	53271153	0.00652146	0.114324	1.0,1.0	0.613,1.0
18228	ENSG00000128573.26	FOXP2	chr7	+	114629591	114629642	114628539	114628677	114629864	114630005	200	3.91022e-06	0.000653543	0.427,0.598	1.0,1.0	-0.488		6906	ENSG00000119509.13	INVS	chr9	+	100292325	100293043	100292325	100292436	100292946	100293043	659	0.000830415	0.0220924	1.0,1.0	0.879,0.731	0.195	2030	ENSG00000188002.10	RP11-43F13.1	chr5	-	1632643	1632906	1632844	1632906	1602690	1602735	0.00658615	0.114823	0.561,1.0	1.0,0.051
19447	ENSG00000114867.22	EIF4G1	chr3	+	184315762	184315856	184314494	184314674	184317716	184317773	243	4.01179e-06	0.000666856	0.831,0.29	0.0,0.0	0.56		7645	ENSG00000186073.14	CDIN1	chr15	+	36808323	36810244	36808323	36808489	36808903	36810244	563	0.000846918	0.0220924	0.935,1.0	0.89,0.69	0.177	3747	ENSG00000284770.2	TBCE	chr1	+	235442851	235442961	235442851	235442911	235448348	235448440	0.00673801	0.116829	0.5,0.214	0.111,0.097
58864	ENSG00000151150.22	ANK3	chr10	-	60068648	60068869	60067934	60068009	60069977	60072569	370	4.15483e-06	0.00068688	0.644,0.212	1.0,1.0	-0.572		7960	ENSG00000166598.16	HSP90B1	chr12	+	103931520	103932418	103931520	103931623	103932276	103932418	802	0.000876101	0.0224406	0.042,0.05	0.107,0.113	-0.064	4448	ENSG00000174446.13	SNAPC5	chr15	-	66494902	66495419	66495329	66495419	66493467	66494552	0.00679836	0.117235	0.079,0.094	0.341,0.408
61022	ENSG00000166833.22	NAV2	chr11	+	20051288	20051333	20048727	20049195	20054079	20054240	194	4.2836e-06	0.00070434	0.094,0.089	0.023,0.0	0.08		5916	ENSG00000214548.18	MEG3	chr14	+	100829033	100831534	100829033	100829787	100831420	100831534	1782	0.000907985	0.0231315	1.0,1.0	0.784,0.881	0.167	4884	ENSG00000109180.15	OCIAD1	chr4	+	48831226	48831496	48831226	48831398	48832619	48832682	0.00704322	0.120801	0.311,1.0	1.0,1.0
54103	ENSG00000285953.1	CTB-161K23.3	chr7	-	92234807	92234923	92226525	92226682	92235402	92235646	265	4.52045e-06	0.000739289	0.646,0.607	1.0,1.0	-0.373		852	ENSG00000101639.18	CEP192	chr18	+	13057584	13059312	13057584	13057733	13059081	13059312	1497	0.000917638	0.0232518	0.063,0.044	0.124,0.117	-0.067	970	ENSG00000108788.12	MLX	chr17	+	42567071	42567328	42567071	42567166	42567618	42567655	0.00709348	0.121009	0.138,0.193	0.08,0.0
3229	ENSG00000186272.13	ZNF17	chr19	+	57417911	57418038	57411178	57411406	57419634	57421803	276	4.626e-06	0.000747804	0.519,0.543	1.0,1.0	-0.469		2469	ENSG00000119139.21	TJP2	chr9	+	69252814	69255187	69252814	69252900	69254208	69255187	1457	0.0009461	0.0238448	0.133,0.214	1.0,0.417	-0.535	633	ENSG00000104915.15	STX10	chr19	-	13144763	13144870	13144767	13144870	13144576	13144671	0.00730542	0.123958	0.904,0.932	1.0,1.0
33672	ENSG00000204843.13	DCTN1	chr2	-	74374322	74374340	74372927	74372948	74377431	74377466	167	4.64627e-06	0.000747804	0.349,0.527	0.0,0.0	0.438		2367	ENSG00000070061.16	ELP1	chr9	-	108897147	108898581	108897147	108897285	108898501	108898581	1365	0.000955612	0.0239564	0.009,0.02	0.123,0.025	-0.059	3195	ENSG00000062822.15	POLD1	chr19	+	50409518	50409666	50409518	50409594	50413425	50413521	0.00759107	0.12812	0.771,0.859	1.0,1.0
49645	ENSG00000132436.12	FIGNL1	chr7	-	50447967	50448055	50446980	50447297	50448180	50448289	237	4.61746e-06	0.000747804	0.274,0.35	0.0,0.0	0.312		4634	ENSG00000141504.12	SAT2	chr17	-	7627362	7627802	7627362	7627414	7627552	7627802	287	0.00100611	0.025089	0.069,0.033	0.148,0.539	-0.293	3832	ENSG00000100578.18	KIAA0586	chr14	+	58459842	58460070	58459842	58459909	58460985	58461160	0.00770468	0.129349	1.0,1.0	0.862,0.783
41895	ENSG00000204084.13	INPP5B	chr1	-	37943795	37943893	37943639	37943669	37945755	37945850	247	4.83135e-06	0.000765442	0.751,0.475	1.0,1.0	-0.387		4757	ENSG00000185684.15	EP400P1	chr12	+	132103996	132105304	132103996	132104170	132104566	132105304	545	0.00101241	0.025113	0.552,0.722	1.0,1.0	-0.363	3255	ENSG00000198755.11	RPL10A	chr6	+	35468946	35469285	35468946	35469027	35469380	35469529	0.0078877	0.131725	0.036,0.041	0.016,0.03
49052	ENSG00000104218.16	CSPP1	chr8	+	67192688	67192803	67190649	67190759	67193463	67193602	264	4.82534e-06	0.000765442	0.0,0.0	0.53,1.0	-0.765		2552	ENSG00000213523.12	SRA1	chr5	-	140551060	140552184	140551060	140551169	140551981	140552184	961	0.00102908	0.0252607	0.134,0.252	0.402,0.411	-0.213	195	ENSG00000100325.15	ASCC2	chr22	-	29834441	29834550	29834488	29834550	29832244	29832342	0.00805751	0.133159	0.487,1.0	1.0,1.0
56826	ENSG00000136870.11	ZNF189	chr9	+	101399394	101399530	101399027	101399189	101399925	101400010	285	4.81591e-06	0.000765442	0.207,0.343	1.0,1.0	-0.725		7179	ENSG00000107862.6	GBF1	chr10	+	102376559	102377128	102376559	102376800	102376934	102377128	283	0.00102892	0.0252607	0.193,0.149	0.0,0.0	0.171	7207	ENSG00000060237.19	WNK1	chr12	+	890452	890513	890452	890510	894561	894635	0.008034	0.133159	0.938,0.968	0.883,0.771
290	ENSG00000101972.19	STAG2	chrX	+	124021366	124021431	123960518	123960866	124022530	124022671	214	5.12497e-06	0.000807754	0.0,0.41	1.0,1.0	-0.795		1815	ENSG00000203875.13	SNHG5	chr6	-	85677423	85678188	85677423	85677492	85678135	85678188	792	0.00103591	0.0252965	0.601,1.0	1.0,1.0	-0.2	1708	ENSG00000124523.17	SIRT5	chr6	+	13574600	13574744	13574600	13574624	13579450	13579609	0.00819422	0.134152	0.293,0.156	0.0,0.0
22346	ENSG00000103599.20	IQCH	chr15	+	67395290	67395563	67388830	67389006	67400113	67400305	422	5.20777e-06	0.000816573	1.0,0.638	0.0,0.105	0.766		3640	ENSG00000179902.13	C1orf194	chr1	-	109106534	109107122	109106534	109106659	109107006	109107122	496	0.00107202	0.0260435	1.0,1.0	0.147,1.0	0.426	2667	ENSG00000108654.16	DDX5	chr17	-	64501260	64502069	64502009	64502069	64501056	64501143	0.00824447	0.134152	0.862,0.899	0.937,1.0
31112	ENSG00000204131.9	NHSL2	chrX	+	72137093	72137225	72134508	72134704	72138440	72140771	281	5.38615e-06	0.000840211	1.0,1.0	0.21,0.347	0.722		1850	ENSG00000112759.19	SLC29A1	chr6	+	44232342	44233006	44232342	44232428	44232806	44233006	527	0.00108383	0.0261953	0.014,0.0	0.113,0.022	-0.061	6809	ENSG00000181991.16	MRPS11	chr15	+	88467907	88469145	88467907	88468024	88472626	88472725	0.0082262	0.134152	0.127,0.093	0.073,0.054
50806	ENSG00000111206.13	FOXM1	chr12	-	2865354	2865399	2864682	2864752	2866392	2866521	194	5.72261e-06	0.000888143	0.139,0.18	0.038,0.013	0.134		7626	ENSG00000172269.20	DPAGT1	chr11	-	119097141	119097551	119097141	119097297	119097463	119097551	315	0.00109845	0.0264133	0.035,0.033	0.106,0.164	-0.101	2048	ENSG00000198825.15	INPP5F	chr10	+	119792156	119792213	119792156	119792211	119796714	119796913	0.00830594	0.134463	0.885,0.969	1.0,1.0
4280	ENSG00000269416.6	LINC01224	chr19	-	23405999	23406105	23405257	23405335	23415903	23416074	255	5.81732e-06	0.000898258	0.493,1.0	0.0,0.0	0.746		2586	ENSG00000169045.17	HNRNPH1	chr5	-	179617798	179618060	179617798	179617932	179617988	179618060	205	0.00111068	0.0264376	0.053,0.039	0.074,0.088	-0.035	1905	ENSG00000129595.14	EPB41L4A	chr5	-	112170255	112170369	112170300	112170369	112168994	112169105	0.00855468	0.137787	0.0,0.0	0.046,0.204
51409	ENSG00000128595.17	CALU	chr7	+	128754261	128754455	128748572	128748804	128754528	128754722	343	5.87575e-06	0.000902698	0.768,0.818	0.936,0.943	-0.147		2600	ENSG00000131143.10	COX4I1	chr16	+	85804936	85805864	85804936	85805104	85805732	85805864	777	0.00110543	0.0264376	0.434,1.0	1.0,1.0	-0.283	3803	ENSG00000034053.15	APBA2	chr15	+	28921639	28921749	28921639	28921718	28995752	28995806	0.00872182	0.139769	0.688,0.818	0.884,0.962
52582	ENSG00000108423.15	TUBD1	chr17	-	59866608	59866749	59863663	59863847	59874538	59874703	290	6.03438e-06	0.000922411	0.709,0.586	1.0,1.0	-0.353		5002	ENSG00000189350.13	TOGARAM2	chr2	+	29045323	29052230	29045323	29045410	29051755	29052230	6494	0.00111838	0.026487	0.084,1.0	1.0,1.0	-0.458	211	ENSG00000100027.17	YPEL1	chr22	-	21710486	21710908	21710627	21710908	21703838	21703882	0.00885654	0.1409	0.673,0.146	0.339,1.0
57577	ENSG00000005810.19	MYCBP2	chr13	-	77103208	77103310	77097369	77099013	77118339	77118519	251	6.44077e-06	0.000979609	0.372,0.308	0.065,0.0	0.307		7199	ENSG00000146247.14	PHIP	chr6	-	78955612	78958600	78955612	78955682	78958474	78958600	2941	0.00112705	0.0265589	0.201,0.224	0.386,0.328	-0.144	1139	ENSG00000104731.14	KLHDC4	chr16	-	87756398	87756477	87756421	87756477	87755193	87755292	0.00911921	0.1409	0.536,0.79	0.905,0.912
16488	ENSG00000196912.12	ANKRD36B	chr2	-	97560664	97560737	97558965	97558994	97560831	97560860	222	6.59813e-06	0.00099855	0.831,0.834	1.0,1.0	-0.167		2501	ENSG00000011143.19	MKS1	chr17	-	58206464	58207218	58206464	58206547	58207084	58207218	686	0.00113808	0.0266524	0.0,0.151	0.465,0.303	-0.308	3237	ENSG00000058056.10	USP13	chr3	+	179721401	179721735	179721401	179721589	179730188	179730260	0.00907807	0.1409	0.0,0.018	0.101,0.063
39463	ENSG00000134324.12	LPIN1	chr2	+	11776085	11776193	11773619	11773745	11779518	11779645	257	6.99315e-06	0.00105309	0.232,0.127	0.014,0.031	0.157		3331	ENSG00000090316.16	MAEA	chr4	+	1336860	1338617	1336860	1336994	1338425	1338617	1580	0.0011457	0.0266524	0.725,0.718	1.0,1.0	-0.278	3248	ENSG00000134207.17	SYT6	chr1	-	114097726	114097877	114097747	114097877	114093734	114093803	0.00903464	0.1409	0.305,1.0	1.0,1.0
10701	ENSG00000177082.13	WDR73	chr15	-	84645972	84646085	84645468	84645836	84646183	84646348	262	7.0436e-06	0.00105546	0.0,0.0	0.416,0.275	-0.346		7939	ENSG00000165280.18	VCP	chr9	-	35060312	35060923	35060312	35060525	35060800	35060923	424	0.00114798	0.0266524	0.042,0.03	0.011,0.013	0.024	3918	ENSG00000197472.15	ZNF695	chr1	-	246999911	247000074	246999947	247000074	246999347	246999440	0.00910856	0.1409	0.446,0.408	1.0,0.668
66819	ENSG00000170919.16	TPT1-AS1	chr13	+	45390757	45390902	45389734	45389820	45391031	45391619	294	7.15611e-06	0.00106707	1.0,1.0	0.67,0.403	0.464		1258	ENSG00000129219.14	PLD2	chr17	+	4807983	4808416	4807983	4808114	4808273	4808416	308	0.00115593	0.0267054	0.492,0.492	0.0,0.065	0.46	4834	ENSG00000114861.23	FOXP1	chr3	-	70972010	70972676	70972554	70972676	70970735	70970805	0.009192	0.1409	0.105,0.048	0.261,0.086
61439	ENSG00000198796.7	ALPK2	chr18	-	58514992	58515081	58503930	58504148	58516907	58517182	238	7.50477e-06	0.0011136	0.676,0.173	1.0,1.0	-0.576		4626	ENSG00000198399.15	ITSN2	chr2	-	24202863	24204418	24202863	24203783	24204244	24204418	610	0.00116828	0.0268591	0.299,1.0	0.068,0.034	0.598	6018	ENSG00000185386.15	MAPK11	chr22	-	50267252	50267286	50267256	50267286	50267126	50267174	0.00896749	0.1409	0.438,0.0	0.0,0.0
10347	ENSG00000007541.17	PIGQ	chr16	+	582247	582309	580182	580972	582882	582893	211	7.88455e-06	0.00116427	0.382,0.414	0.827,0.77	-0.4		4769	ENSG00000117122.14	MFAP2	chr1	-	16976707	16978314	16976707	16976923	16978236	16978314	1462	0.00128583	0.029418	0.505,0.359	1.0,1.0	-0.568	6861	ENSG00000129083.13	COPB1	chr11	-	14499706	14499811	14499741	14499811	14498837	14498985	0.00917743	0.1409	0.859,0.69	0.41,0.503
46986	ENSG00000160209.19	PDXK	chr21	+	43732138	43732647	43728899	43729010	43734068	43734123	658	7.93505e-06	0.00116607	0.505,0.475	0.102,0.0	0.439		686	ENSG00000105127.10	AKAP8	chr19	-	15372217	15373340	15372217	15372347	15372850	15373340	652	0.00131808	0.0300102	1.0,1.0	1.0,0.255	0.373	7792	ENSG00000084072.17	PPIE	chr1	+	39745374	39748767	39745374	39745498	39748902	39749088	0.00892632	0.1409	0.048,0.058	0.128,0.078
5002	ENSG00000100242.15	SUN2	chr22	-	38754641	38754706	38752506	38752665	38755762	38756000	214	8.21161e-06	0.00120091	0.0,0.0	0.148,0.258	-0.203		1176	ENSG00000175061.18	SNHG29	chr17	+	16439326	16439703	16439326	16439414	16439580	16439703	315	0.00133422	0.030087	0.57,0.461	0.757,0.759	-0.243	273	ENSG00000156253.7	RWDD2B	chr21	-	29008239	29008621	29008394	29008621	29007760	29008123	0.00942794	0.143474	0.495,0.56	0.729,1.0
4314	ENSG00000089639.11	GMIP	chr19	-	19635643	19635721	19635414	19635569	19636706	19636787	227	8.41365e-06	0.00122122	0.0,0.0	1.0,0.496	-0.748		2108	ENSG00000007402.12	CACNA2D2	chr3	-	50364887	50365184	50364887	50364970	50365074	50365184	253	0.0013309	0.030087	0.128,0.089	0.371,1.0	-0.577	4998	ENSG00000163161.14	ERCC3	chr2	-	127292083	127292846	127292609	127292846	127290223	127290273	0.0094504	0.143474	0.181,0.095	0.284,0.286
11578	ENSG00000138606.19	SHF	chr15	-	45172146	45172318	45171845	45172078	45175218	45175425	321	8.43077e-06	0.00122122	0.807,0.0	1.0,1.0	-0.597		7886	ENSG00000175197.13	DDIT3	chr12	-	57517268	57517753	57517268	57517424	57517705	57517753	430	0.00134731	0.0302376	0.634,1.0	1.0,1.0	-0.183	4818	ENSG00000166340.18	TPP1	chr11	-	6617353	6617428	6617358	6617428	6616974	6617153	0.0095549	0.14437	1.0,0.421	1.0,1.0
53756	ENSG00000241852.10	C8orf58	chr8	+	22602536	22602643	22602199	22602312	22603194	22603288	256	8.77416e-06	0.00126493	0.482,0.762	1.0,1.0	-0.378		2862	ENSG00000172432.19	GTPBP2	chr6	-	43624887	43625560	43624887	43625062	43625362	43625560	449	0.0013547	0.0302593	0.129,0.142	0.322,0.384	-0.217	7269	ENSG00000110841.14	PPFIBP1	chr12	+	27664361	27664446	27664361	27664437	27667165	27667320	0.00970436	0.145933	0.696,0.696	0.447,0.513
7912	ENSG00000176974.20	SHMT1	chr17	-	18348324	18348440	18347495	18347656	18353671	18353817	265	9.13686e-06	0.00131101	0.855,0.474	1.0,1.0	-0.336		2711	ENSG00000169660.17	HEXD	chr17	+	82436666	82437363	82436666	82436738	82437167	82437363	578	0.00137583	0.0305862	1.0,1.0	1.0,0.591	0.205	294	ENSG00000026036.22	RTEL1-TNFRSF6B	chr20	+	63695327	63695650	63695327	63695480	63695777	63697191	0.00981252	0.146864	0.64,0.359	0.651,1.0
17048	ENSG00000164073.11	MFSD8	chr4	-	127939852	127939997	127938782	127938836	127942044	127942158	294	9.58286e-06	0.00135582	0.503,0.0	1.0,1.0	-0.748		8255	ENSG00000129460.16	NGDN	chr14	+	23477199	23477560	23477199	23477356	23477502	23477560	295	0.00139758	0.0309238	0.716,1.0	1.0,0.0	0.358	787	ENSG00000141556.22	TBCD	chr17	+	82932657	82932855	82932657	82932735	82937270	82937360	0.00987852	0.147157	0.095,0.012	0.0,0.0
22191	ENSG00000023330.15	ALAS1	chr3	+	52198671	52198848	52198093	52198255	52199220	52199440	326	9.54285e-06	0.00135582	1.0,1.0	0.432,0.578	0.495		2344	ENSG00000141644.18	MBD1	chr18	-	50276661	50276998	50276661	50276744	50276831	50276998	236	0.00145106	0.0318085	0.089,0.0	0.219,0.24	-0.185	2936	ENSG00000143341.12	HMCN1	chr1	+	185962517	185962666	185962517	185962659	185963767	185963895	0.0100166	0.147826	0.062,0.089	0.0,0.048
59488	ENSG00000119912.18	IDE	chr10	-	92480792	92480916	92478644	92478789	92483254	92483337	273	9.56448e-06	0.00135582	0.154,0.522	1.0,1.0	-0.662		5363	ENSG00000157978.12	LDLRAP1	chr1	+	25563660	25565207	25563660	25563791	25565172	25565207	1530	0.0014497	0.0318085	0.568,1.0	0.14,0.268	0.58	4326	ENSG00000187741.15	FANCA	chr16	-	89798950	89799232	89799165	89799232	89795905	89796018	0.0100119	0.147826	0.319,0.128	0.07,0.089
32087	ENSG00000167110.18	GOLGA2	chr9	-	128272784	128272865	128268419	128268524	128273849	128273972	230	1.0383e-05	0.00146223	0.137,0.145	0.031,0.0	0.126		5367	ENSG00000042429.12	MED17	chr11	+	93793727	93794035	93793727	93793864	93793950	93794035	235	0.00149161	0.0325461	0.116,0.068	0.322,0.189	-0.164	2245	ENSG00000171475.14	WIPF2	chr17	+	40260534	40260667	40260534	40260627	40262524	40262641	0.0100794	0.148065	0.863,0.734	1.0,1.0
12876	ENSG00000154134.15	ROBO3	chr11	+	124877160	124877184	124876485	124876932	124877266	124877309	173	1.10098e-05	0.00153628	0.0,0.301	1.0,1.0	-0.85		498	ENSG00000087088.20	BAX	chr19	+	48955547	48955833	48955547	48955599	48955686	48955833	236	0.0015422	0.0334948	0.318,0.24	0.486,0.457	-0.193	4488	ENSG00000168300.14	PCMTD1	chr8	-	51860844	51861246	51860860	51861246	51845660	51845763	0.0105997	0.15499	1.0,1.0	0.844,0.863
51286	ENSG00000008311.16	AASS	chr7	-	122079148	122079351	122078861	122078950	122079596	122079712	352	1.09916e-05	0.00153628	0.086,0.0	0.458,0.748	-0.56		3135	ENSG00000146555.19	SDK1	chr7	+	4265123	4269000	4265123	4265248	4268677	4269000	3578	0.00157207	0.0339869	0.923,1.0	0.829,0.793	0.151	1967	ENSG00000123219.13	CENPK	chr5	-	65561462	65561564	65561496	65561564	65554796	65554946	0.0107613	0.155207	1.0,0.62	0.62,0.765
57720	ENSG00000160326.14	SLC2A6	chr9	-	133473414	133473600	133473104	133473250	133473979	133474088	335	1.11183e-05	0.00154433	0.816,0.527	1.0,1.0	-0.329		6875	ENSG00000196305.19	IARS1	chr9	-	92250712	92251885	92250712	92250834	92251807	92251885	1122	0.00158505	0.0341112	0.055,0.04	0.091,0.071	-0.033	3040	ENSG00000182919.15	C11orf54	chr11	+	93741962	93742094	93741962	93742066	93747296	93747448	0.010664	0.155207	1.0,1.0	1.0,0.654
46879	ENSG00000029363.17	BCLAF1	chr6	-	136273962	136274189	136273081	136273187	136275531	136275701	376	1.11879e-05	0.00154693	0.006,0.008	0.07,0.024	-0.04		7259	ENSG00000256269.10	HMBS	chr11	+	119092124	119092523	119092124	119092163	119092403	119092523	389	0.00160602	0.0344054	0.247,1.0	1.0,1.0	-0.377	3675	ENSG00000004975.12	DVL2	chr17	-	7230045	7230155	7230057	7230155	7229807	7229943	0.0107431	0.155207	0.641,0.686	0.898,0.816
32881	ENSG00000198925.12	ATG9A	chr2	-	219229009	219229174	219228433	219228485	219229534	219229618	314	1.21304e-05	0.00166966	0.322,0.0	1.0,0.587	-0.632		4940	ENSG00000117385.16	P3H1	chr1	-	42754868	42755217	42754868	42754990	42755164	42755217	323	0.00164533	0.0349299	0.047,0.127	0.362,0.187	-0.187	4875	ENSG00000136271.11	DDX56	chr7	-	44569983	44570128	44570014	44570128	44569808	44569903	0.01127	0.161808	0.0,0.076	0.554,0.073
34817	ENSG00000267470.6	ZNF571-AS1	chr19	+	37583482	37583834	37569849	37569996	37585338	37587348	501	1.23158e-05	0.00168754	0.229,0.229	1.0,1.0	-0.771		5309	ENSG00000163703.20	CRELD1	chr3	+	9933856	9934612	9933856	9934080	9934419	9934612	488	0.00163885	0.0349299	0.824,0.853	1.0,1.0	-0.161	3775	ENSG00000107404.20	DVL1	chr1	-	1339286	1339439	1339361	1339439	1338521	1338653	0.0114251	0.162036	0.709,0.933	0.557,0.603
39266	ENSG00000145349.18	CAMK2D	chr4	-	113502935	113502977	113500462	113500511	113509637	113509675	191	1.24132e-05	0.00168881	0.122,0.07	0.0,0.0	0.096		7068	ENSG00000107863.19	ARHGAP21	chr10	-	24595887	24596882	24595887	24596043	24596739	24596882	845	0.00169019	0.0357213	0.179,0.202	0.357,0.289	-0.132	4430	ENSG00000084623.12	EIF3I	chr1	+	32226170	32226320	32226170	32226283	32228498	32228609	0.0114391	0.162036	1.0,0.167	1.0,1.0
52626	ENSG00000104756.16	KCTD9	chr8	-	25450379	25450481	25446128	25446250	25458198	25458280	251	1.24361e-05	0.00168881	1.0,0.64	0.229,0.0	0.706		1703	ENSG00000130529.16	TRPM4	chr19	+	49188640	49189091	49188640	49188770	49188945	49189091	324	0.00178109	0.0366562	1.0,0.315	0.315,0.0	0.5	6030	ENSG00000104365.16	IKBKB	chr8	+	42293442	42293568	42293442	42293512	42305186	42305275	0.0113435	0.162036	0.293,0.209	0.154,0.0
56939	ENSG00000157654.19	PALM2AKAP2	chr9	+	109931926	109932028	109925060	109925082	109942685	109942773	251	1.27843e-05	0.00172387	0.704,0.679	1.0,1.0	-0.308		4840	ENSG00000108592.17	FTSJ3	chr17	-	63820838	63821115	63820838	63820938	63821029	63821115	240	0.00177256	0.0366562	0.237,0.271	0.685,0.736	-0.457	6457	ENSG00000142089.17	IFITM3	chr11	-	320112	320841	320564	320841	319675	319985	0.01156	0.163022	0.331,1.0	0.465,0.623
66818	ENSG00000170919.16	TPT1-AS1	chr13	+	45390713	45390902	45387584	45389820	45391031	45391676	338	1.28076e-05	0.00172387	1.0,1.0	0.618,0.569	0.407		5490	ENSG00000205726.15	ITSN1	chr21	+	33829005	33829745	33829005	33829050	33829623	33829745	722	0.00175664	0.0366562	0.736,0.591	0.843,1.0	-0.258	1175	ENSG00000261556.10	SMG1P7	chr16	-	70231322	70231523	70231436	70231523	70230993	70231158	0.0117332	0.163772	0.274,0.221	0.0,0.124
14867	ENSG00000206149.10	HERC2P9	chr15	+	28642372	28642564	28641429	28641581	28648879	28649067	341	1.291e-05	0.00172999	1.0,1.0	0.304,0.766	0.465		5549	ENSG00000135451.13	TROAP	chr12	+	49330144	49331407	49330144	49330573	49331213	49331407	789	0.00177749	0.0366562	1.0,1.0	0.816,0.817	0.183	2618	ENSG00000150093.20	ITGB1	chr10	-	32933350	32933583	32933481	32933583	32932514	32932600	0.011768	0.163772	0.68,0.444	1.0,1.0
30198	ENSG00000143748.18	NVL	chr1	-	224301690	224301771	224300561	224300663	224303722	224303857	230	1.30856e-05	0.00174584	0.261,0.245	0.0,0.031	0.237		7096	ENSG00000072134.15	EPN2	chr17	+	19281954	19283714	19281954	19282077	19282949	19283714	1021	0.0017431	0.0366562	0.127,0.127	0.048,0.052	0.077	4300	ENSG00000158545.16	ZC3H18	chr16	+	88577109	88577726	88577109	88577375	88586599	88586684	0.0116702	0.163772	0.884,0.835	1.0,1.0
51401	ENSG00000165055.16	METTL2B	chr7	+	128477081	128477173	128476747	128476875	128479157	128479513	241	1.32609e-05	0.0017615	1.0,1.0	0.481,0.756	0.381		7909	ENSG00000161217.12	PCYT1A	chr3	-	196247366	196248323	196247366	196247518	196248206	196248323	837	0.00177434	0.0366562	0.093,0.157	0.053,0.034	0.082	5767	ENSG00000158528.12	PPP1R9A	chr7	+	95284017	95284330	95284017	95284216	95286205	95286325	0.0118745	0.164531	0.142,0.139	0.382,0.274
30421	ENSG00000124532.15	MRS2	chr6	+	24408407	24408444	24405167	24405241	24412221	24412395	186	1.34046e-05	0.00177284	1.0,1.0	0.348,0.815	0.419		2008	ENSG00000140497.16	SCAMP2	chr15	-	74852068	74854119	74852068	74852186	74854020	74854119	1983	0.00179863	0.0366968	0.174,0.111	0.474,0.412	-0.3	7045	ENSG00000131626.19	PPFIA1	chr11	+	70338373	70338453	70338373	70338434	70339170	70339306	0.0119392	0.16471	0.948,0.951	0.989,1.0
4374	ENSG00000105662.16	CRTC1	chr19	+	18774899	18774986	18768484	18768793	18775640	18775821	236	1.41479e-05	0.00186305	0.654,0.486	0.874,1.0	-0.367		6627	ENSG00000148926.10	ADM	chr11	+	10305679	10306098	10305679	10305798	10305948	10306098	299	0.00179146	0.0366968	1.0,0.125	1.0,1.0	-0.438	253	ENSG00000182093.16	GET1	chr21	+	39390697	39391476	39390697	39390919	39391768	39391836	0.0121808	0.166593	1.0,0.747	0.27,1.0
14657	ENSG00000168916.16	ZNF608	chr5	-	124744083	124745172	124701013	124701269	124746194	124746639	1238	1.44634e-05	0.00188018	0.932,0.802	1.0,1.0	-0.133		2319	ENSG00000182979.18	MTA1	chr14	+	105464462	105464863	105464462	105464567	105464673	105464863	255	0.00180658	0.0367001	0.077,0.28	0.061,0.0	0.148	2350	ENSG00000247708.8	STX18-AS1	chr4	+	4542142	4542625	4542142	4542426	4544737	4544907	0.0121657	0.166593	1.0,0.243	0.631,1.0
52884	ENSG00000077782.22	FGFR1	chr8	-	38429681	38429948	38427920	38428435	38457355	38457446	416	1.442e-05	0.00188018	0.895,0.935	0.99,0.991	-0.075		2373	ENSG00000113194.13	FAF2	chr5	+	176493998	176494275	176493998	176494084	176494183	176494275	248	0.00183133	0.0370432	0.039,0.0	0.141,0.118	-0.11	5094	ENSG00000123607.16	TTC21B	chr2	-	165883789	165884018	165883793	165884018	165880678	165880799	0.0124049	0.168849	0.0,0.358	0.0,0.0
54217	ENSG00000164933.12	SLC25A32	chr8	-	103404775	103404861	103403163	103403324	103407633	103407784	235	1.4388e-05	0.00188018	0.699,0.805	1.0,1.0	-0.248		913	ENSG00000184009.13	ACTG1	chr17	-	81510926	81511626	81510926	81511108	81511187	81511626	228	0.00187135	0.0376909	0.012,0.013	0.024,0.017	-0.008	7110	ENSG00000087053.20	MTMR2	chr11	-	95923620	95923864	95923691	95923864	95888155	95888261	0.0124522	0.168849	0.0,0.0	0.404,1.0
51806	ENSG00000110074.11	FOXRED1	chr11	+	126274926	126275021	126273335	126273454	126275326	126275428	244	1.47441e-05	0.00190852	1.0,1.0	0.478,0.449	0.536		6591	ENSG00000108465.15	CDK5RAP3	chr17	+	47973518	47974031	47973518	47973696	47973930	47974031	383	0.00190903	0.0382862	1.0,1.0	1.0,0.353	0.324	5308	ENSG00000119977.22	TCTN3	chr10	-	95682650	95683629	95683100	95683629	95680471	95680609	0.0125374	0.169281	0.781,0.891	0.921,1.0
10319	ENSG00000161996.19	WDR90	chr16	+	660057	660161	659244	659376	660611	660714	253	1.49656e-05	0.00192372	1.0,1.0	0.541,0.44	0.509		7885	ENSG00000020577.14	SAMD4A	chr14	+	54784339	54784620	54784339	54784447	54784536	54784620	238	0.00197072	0.0393559	1.0,1.0	0.914,0.824	0.131	3422	ENSG00000182923.20	CEP63	chr3	+	134559149	134559429	134559149	134559305	134561376	134565031	0.0126683	0.170324	0.686,0.621	1.0,0.793
39958	ENSG00000142920.17	AZIN2	chr1	+	33081600	33081812	33081387	33081508	33082177	33082354	361	1.4988e-05	0.00192372	1.0,1.0	0.292,0.382	0.663		179	ENSG00000100412.17	ACO2	chr22	+	41522829	41523278	41522829	41522987	41523204	41523278	366	0.00205705	0.0404123	0.198,0.113	0.05,0.062	0.1	4329	ENSG00000144233.11	AMMECR1L	chr2	-	127870761	127870928	127870813	127870928	127869453	127869544	0.0127777	0.17107	0.357,0.085	0.0,0.0
8936	ENSG00000196696.13	PDXDC2P-NPIPB14P	chr16	-	70014103	70014167	69996389	69996468	70018046	70018097	213	1.64607e-05	0.00207303	1.0,1.0	0.677,0.412	0.456		394	ENSG00000184634.16	MED12	chrX	+	71137725	71137943	71137725	71137780	71137855	71137943	224	0.00204514	0.0404123	0.936,0.935	0.812,0.818	0.121	4636	ENSG00000112992.18	NNT	chr5	+	43612907	43613481	43612907	43613137	43615847	43616065	0.0129053	0.171398	0.19,0.254	0.42,0.377
11481	ENSG00000166262.16	FAM227B	chr15	-	49577628	49577664	49576135	49576845	49588015	49588083	185	1.63609e-05	0.00207303	1.0,1.0	0.0,0.707	0.647		504	ENSG00000105443.15	CYTH2	chr19	+	48474837	48478145	48474837	48474949	48478068	48478145	3268	0.00207507	0.0404123	0.721,0.761	1.0,0.915	-0.217	7698	ENSG00000165801.10	ARHGEF40	chr14	+	21075331	21075765	21075331	21075499	21076359	21076456	0.0129102	0.171398	1.0,0.859	0.633,0.863
19522	ENSG00000182473.22	EXOC7	chr17	-	76090328	76090397	76089174	76089320	76091142	76091235	218	1.64842e-05	0.00207303	0.0,0.0	0.186,0.578	-0.382		1985	ENSG00000112514.18	CUTA	chr6	-	33416549	33416776	33416549	33416660	33416748	33416776	237	0.00206798	0.0404123	0.94,0.959	0.984,0.985	-0.035	28	ENSG00000155966.14	AFF2	chrX	+	148843381	148843433	148843381	148843415	148885888	148885985	0.0134174	0.17739	0.14,0.151	0.0,0.0
35775	ENSG00000067141.17	NEO1	chr15	+	73293389	73293548	73289073	73289238	73298347	73298611	308	1.64921e-05	0.00207303	0.743,0.784	0.886,0.885	-0.122		5640	ENSG00000115661.14	STK16	chr2	+	219245895	219246876	219245895	219246085	219246656	219246876	720	0.00207358	0.0404123	0.383,1.0	0.341,0.293	0.374	2504	ENSG00000163660.12	CCNL1	chr3	-	157151728	157151930	157151916	157151930	157150281	157150381	0.0138746	0.180457	1.0,0.962	0.946,0.874
50479	ENSG00000028277.21	POU2F2	chr19	-	42116708	42117005	42099715	42099821	42117249	42117432	446	1.62482e-05	0.00207303	0.429,0.728	1.0,1.0	-0.421		6785	ENSG00000147955.18	SIGMAR1	chr9	-	34636996	34637420	34636996	34637089	34637219	34637420	279	0.00204903	0.0404123	0.0,0.0	0.045,0.071	-0.058	4724	ENSG00000086189.11	DIMT1	chr5	-	62403667	62403902	62403693	62403902	62403272	62403346	0.0138984	0.180457	1.0,0.0	0.0,0.254
11323	ENSG00000130529.16	TRPM4	chr19	+	49181348	49181461	49172008	49172108	49182577	49182867	262	1.70012e-05	0.00212797	0.655,0.561	1.0,1.0	-0.392		2513	ENSG00000011143.19	MKS1	chr17	-	58214740	58216243	58214740	58214838	58216087	58216243	1398	0.00210694	0.0404443	0.096,0.066	0.242,0.439	-0.26	5451	ENSG00000100445.18	SDR39U1	chr14	-	24442108	24442260	24442177	24442260	24441677	24441795	0.01382	0.180457	0.073,0.047	0.24,0.186
46836	ENSG00000108021.20	TASOR2	chr10	+	5709529	5709663	5684941	5685175	5712822	5712918	283	1.70691e-05	0.00212797	1.0,1.0	0.441,0.208	0.675		3659	ENSG00000064601.21	CTSA	chr20	+	45892272	45892484	45892272	45892323	45892397	45892484	223	0.0020879	0.0404443	0.044,0.16	0.0,0.029	0.088	7104	ENSG00000087053.20	MTMR2	chr11	-	95850207	95850749	95850599	95850749	95849673	95849862	0.0138297	0.180457	0.0,0.0	0.014,0.069
34200	ENSG00000245534.7	RORA-AS1	chr15	+	60519965	60520269	60510407	60510533	60528579	60528727	453	1.72772e-05	0.00214059	0.664,1.0	0.0,0.248	0.708		3720	ENSG00000122008.15	POLK	chr5	+	75597746	75598040	75597746	75597789	75597933	75598040	293	0.00211103	0.0404443	1.0,0.504	0.337,0.433	0.367	7408	ENSG00000135679.26	MDM2	chr12	+	68835828	68835984	68835828	68835843	68836671	68836749	0.0139338	0.180457	0.972,1.0	0.883,0.981
40336	ENSG00000166348.19	USP54	chr10	-	73534599	73534770	73530703	73530835	73536268	73536437	320	1.73143e-05	0.00214059	0.432,0.368	0.115,0.076	0.304		7492	ENSG00000172732.12	MUS81	chr11	+	65865810	65866439	65865810	65865894	65865985	65866439	240	0.00209821	0.0404443	0.041,0.061	0.105,0.154	-0.079	6715	ENSG00000171311.13	EXOSC1	chr10	-	97438662	97438703	97438669	97438703	97437699	97437750	0.0141438	0.182432	0.0,0.08	0.12,0.323
48578	ENSG00000182095.15	TNRC18	chr7	-	5329936	5329969	5325095	5325248	5332621	5332878	182	1.73815e-05	0.00214059	0.036,0.0	0.162,0.176	-0.151		428	ENSG00000125875.15	TBC1D20	chr20	-	437439	438841	437439	437598	438549	438841	1100	0.00212433	0.0404643	0.801,0.965	1.0,1.0	-0.117	7796	ENSG00000119688.21	ABCD4	chr14	-	74288659	74288765	74288715	74288765	74288206	74288259	0.0142822	0.183471	0.068,0.062	0.0,0.0
8924	ENSG00000090857.14	PDPR	chr16	+	70130422	70130544	70128783	70129122	70132150	70132300	271	1.81514e-05	0.0022264	0.553,0.355	1.0,1.0	-0.546		2688	ENSG00000145191.15	EIF2B5	chr3	+	184143051	184144707	184143051	184144224	184144596	184144707	521	0.00212925	0.0404643	0.13,0.131	0.039,0.035	0.093	1615	ENSG00000085511.20	MAP3K4	chr6	+	161093772	161093851	161093772	161093839	161097079	161097176	0.0144159	0.183702	0.174,0.391	0.481,0.496
15080	ENSG00000081189.16	MEF2C	chr5	-	88730210	88730234	88729217	88729347	88731728	88731827	173	1.84581e-05	0.00225492	0.197,0.508	0.0,0.0	0.353		5749	ENSG00000187091.14	PLCD1	chr3	-	38009903	38010275	38009903	38010053	38010130	38010275	226	0.00226147	0.0428044	0.057,0.092	0.305,0.152	-0.154	7713	ENSG00000172262.12	ZNF131	chr5	+	43161248	43161613	43161248	43161606	43161708	43161931	0.0143852	0.183702	0.254,0.053	0.241,0.0
20791	ENSG00000088305.18	DNMT3B	chr20	+	32791600	32791708	32788853	32789012	32795408	32795534	257	1.90117e-05	0.00231327	0.802,0.225	1.0,1.0	-0.486		345	ENSG00000124228.15	DDX27	chr20	+	49243628	49244077	49243628	49243703	49243815	49244077	261	0.00239074	0.0445358	0.631,1.0	0.533,0.276	0.411	4249	ENSG00000088280.19	ASAP3	chr1	-	23433076	23433272	23433157	23433272	23431695	23431918	0.0146207	0.184826	0.957,0.933	0.988,1.0
65127	ENSG00000127311.10	HELB	chr12	+	66313985	66314163	66309705	66310608	66315241	66315383	327	1.91733e-05	0.00232364	0.761,1.0	0.342,0.313	0.553		4683	ENSG00000197841.15	ZNF181	chr19	+	34739147	34739621	34739147	34739268	34739522	34739621	403	0.00238519	0.0445358	1.0,0.769	0.27,0.597	0.451	4922	ENSG00000163703.20	CRELD1	chr3	+	9937561	9937710	9937561	9937672	9938014	9938106	0.0145677	0.184826	0.285,0.0	0.0,0.0
66290	ENSG00000111011.18	RSRC2	chr12	-	122522142	122522329	122521384	122521428	122526847	122526949	336	1.94834e-05	0.00235185	0.399,0.307	1.0,1.0	-0.647		6526	ENSG00000114745.14	GORASP1	chr3	-	39100304	39100877	39100304	39100503	39100787	39100877	433	0.00236804	0.0445358	1.0,0.691	0.364,0.508	0.409	5588	ENSG00000070882.13	OSBPL3	chr7	-	24834086	24834736	24834485	24834736	24830767	24830905	0.0147585	0.185828	0.499,0.521	0.352,1.0
5550	ENSG00000141431.13	ASXL3	chr18	+	33671746	33671866	33670672	33670790	33683404	33683568	269	1.96477e-05	0.00236231	0.716,0.758	1.0,1.0	-0.263		6955	ENSG00000182484.15	WASH6P	chrX	+	156021998	156022459	156021998	156022145	156022322	156022459	326	0.0023861	0.0445358	0.186,1.0	1.0,1.0	-0.407	763	ENSG00000154040.21	CABYR	chr18	+	24155700	24156999	24155700	24156042	24159471	24160069	0.0148955	0.186812	0.377,0.127	0.708,0.485
15370	ENSG00000081377.17	CDC14B	chr9	-	96509672	96509789	96500107	96503789	96515648	96515792	266	2.15751e-05	0.0025747	0.495,0.627	1.0,1.0	-0.439		3214	ENSG00000221829.10	FANCG	chr9	-	35079440	35079942	35079440	35079535	35079730	35079942	344	0.00241458	0.0448027	0.302,0.565	1.0,1.0	-0.567	1844	ENSG00000115762.16	PLEKHB2	chr2	+	131132901	131133015	131132901	131132991	131140169	131140275	0.0151919	0.188297	0.341,0.317	0.097,0.126
28945	ENSG00000122085.17	MTERF4	chr2	-	241099395	241099894	241097186	241097427	241102252	241102287	648	2.15835e-05	0.0025747	0.648,0.71	1.0,1.0	-0.321		1123	ENSG00000108671.11	PSMD11	chr17	+	32479250	32480197	32479250	32479376	32480145	32480197	918	0.00242708	0.0448582	1.0,0.289	1.0,1.0	-0.356	2440	ENSG00000148303.17	RPL7A	chr9	+	133348217	133348573	133348217	133348246	133348921	133349042	0.0151472	0.188297	0.011,0.011	0.025,0.036
32239	ENSG00000172915.19	NBEA	chr13	+	35645868	35645931	35628080	35628248	35646258	35646348	212	2.19955e-05	0.0026136	0.287,0.334	0.0,0.0	0.31		7231	ENSG00000174775.18	HRAS	chr11	-	532241	532755	532241	532522	532630	532755	257	0.00245336	0.0451667	0.723,0.491	1.0,0.744	-0.265	6256	ENSG00000147852.17	VLDLR	chr9	+	2647473	2648347	2647473	2647592	2648668	2648810	0.0151882	0.188297	0.791,0.743	0.351,0.584
36282	ENSG00000167522.16	ANKRD11	chr16	-	89418283	89418368	89316932	89317075	89490244	89490274	234	2.256e-05	0.00267025	1.0,1.0	0.656,0.656	0.344		801	ENSG00000115268.10	RPS15	chr19	+	1438806	1440253	1438806	1438892	1439967	1440253	1224	0.00247794	0.0452243	1.0,0.341	1.0,1.0	-0.33	239	ENSG00000160226.16	CFAP410	chr21	-	44330462	44330916	44330822	44330916	44329890	44330326	0.0152613	0.188421	0.291,0.089	0.068,0.0
55269	ENSG00000133110.15	POSTN	chr13	-	37574571	37574652	37571368	37571458	37577752	37577798	230	2.33197e-05	0.00274947	0.393,0.359	0.781,0.894	-0.462		1887	ENSG00000204410.16	MSH5	chr6	+	31743903	31744299	31743903	31744025	31744138	31744299	262	0.00248527	0.0452243	1.0,1.0	1.0,0.363	0.319	873	ENSG00000266173.7	STRADA	chr17	-	63741453	63741796	63741740	63741796	63728333	63728413	0.0156742	0.192228	0.313,1.0	1.0,1.0
42256	ENSG00000186566.13	GPATCH8	chr17	-	44473724	44473759	44467096	44467114	44474828	44474903	184	2.35308e-05	0.00276364	0.213,0.708	0.0,0.0	0.46		7864	ENSG00000196378.13	ZNF34	chr8	-	144778037	144778525	144778037	144778164	144778438	144778525	423	0.00247972	0.0452243	1.0,0.514	0.335,0.105	0.537	1065	ENSG00000170222.12	ADPRM	chr17	+	10704909	10705615	10704909	10705527	10706437	10706554	0.0156908	0.192228	0.264,0.32	0.0,0.112
51807	ENSG00000110074.11	FOXRED1	chr11	+	126274930	126275021	126273335	126273454	126275326	126275428	240	2.3834e-05	0.00278849	1.0,1.0	0.482,0.453	0.532		1201	ENSG00000108961.14	RANGRF	chr17	+	8289257	8290092	8289257	8289414	8289812	8290092	547	0.00252162	0.0457093	0.544,0.926	0.851,1.0	-0.19	4153	ENSG00000143033.18	MTF2	chr1	+	93110544	93110630	93110544	93110626	93114687	93114783	0.0159766	0.193488	0.05,0.0	0.154,0.061
45887	ENSG00000144395.18	CCDC150	chr2	+	196677114	196677192	196676553	196676731	196677292	196677361	227	2.39437e-05	0.00279059	1.0,1.0	0.467,0.621	0.456		1812	ENSG00000203875.13	SNHG5	chr6	-	85677423	85678032	85677423	85677875	85677953	85678032	227	0.00260345	0.0468322	0.073,0.047	0.165,0.155	-0.1	5125	ENSG00000188243.14	COMMD6	chr13	-	75537498	75537675	75537663	75537675	75530113	75530266	0.0159202	0.193488	0.388,0.031	1.0,0.27
21135	ENSG00000188818.12	ZDHHC11	chr5	-	823388	824093	821860	821895	825163	825251	854	2.54173e-05	0.00292867	1.0,0.786	0.173,0.44	0.587		2143	ENSG00000255717.7	SNHG1	chr11	-	62852810	62853115	62852810	62852839	62853074	62853115	384	0.00260323	0.0468322	0.28,0.25	0.152,0.037	0.171	6733	ENSG00000107862.6	GBF1	chr10	+	102358505	102359435	102358505	102358729	102360183	102360395	0.0158792	0.193488	0.877,0.887	1.0,1.0
26779	ENSG00000117143.13	UAP1	chr1	+	162592731	162592782	162590322	162590511	162597791	162597858	200	2.53757e-05	0.00292867	0.453,0.46	0.096,0.136	0.341		3080	ENSG00000204348.10	DXO	chr6	-	31970605	31971147	31970605	31970825	31970911	31971147	235	0.00266958	0.0478393	0.309,0.337	0.559,0.665	-0.289	2281	ENSG00000124356.17	STAMBP	chr2	+	73828982	73829510	73828982	73829070	73830844	73831059	0.0169063	0.202703	0.903,1.0	0.816,0.861
37825	ENSG00000185684.15	EP400P1	chr12	+	132109767	132109832	132108571	132108682	132114457	132114545	214	2.53943e-05	0.00292867	0.481,0.41	1.0,1.0	-0.554		2901	ENSG00000108654.16	DDX5	chr17	-	64503429	64504116	64503429	64503868	64503982	64504116	263	0.00268231	0.0478852	0.09,0.069	0.161,0.131	-0.067	2897	ENSG00000148498.16	PARD3	chr10	-	34337274	34337426	34337277	34337426	34336198	34336243	0.0168027	0.202703	0.915,0.907	0.809,0.495
52591	ENSG00000108423.15	TUBD1	chr17	-	59886082	59886230	59878300	59878334	59892696	59892893	297	2.57282e-05	0.00295331	0.334,0.834	1.0,1.0	-0.416		2138	ENSG00000168944.17	CEP120	chr5	-	123389923	123391337	123389923	123390005	123391109	123391337	1253	0.00269756	0.0479759	0.665,0.836	1.0,1.0	-0.25	5421	ENSG00000159459.12	UBR1	chr15	-	43025373	43025429	43025380	43025429	43024828	43024983	0.0169292	0.202703	0.072,0.093	0.0,0.04
48226	ENSG00000112902.12	SEMA5A	chr5	-	9423093	9423238	9421676	9421749	9437755	9437852	294	2.59333e-05	0.00296566	0.67,0.458	1.0,1.0	-0.436		6226	ENSG00000140694.17	PARN	chr16	-	14627105	14628251	14627105	14627187	14628171	14628251	1133	0.00272636	0.0483057	1.0,1.0	0.081,1.0	0.46	3233	ENSG00000205309.14	NT5M	chr17	+	17344793	17344926	17344793	17344908	17346804	17347663	0.0170881	0.203837	0.308,0.641	0.0,0.0
32793	ENSG00000136068.16	FLNB	chr3	+	58141857	58141896	58138281	58138529	58142649	58142752	188	2.61973e-05	0.00297349	0.246,0.346	0.04,0.054	0.249		308	ENSG00000203896.10	LIME1	chr20	+	63737820	63738060	63737820	63737902	63738007	63738060	254	0.00275769	0.048316	0.128,0.488	0.0,0.105	0.256	7417	ENSG00000087460.29	GNAS	chr20	+	58898940	58899162	58898940	58898985	58903530	58903585	0.0171785	0.204148	0.191,0.128	0.263,0.314
59506	ENSG00000138190.17	EXOC6	chr10	+	92935813	92935885	92934309	92934430	92940726	92940824	221	2.6131e-05	0.00297349	1.0,1.0	0.757,0.933	0.155		7633	ENSG00000172269.20	DPAGT1	chr11	-	119100629	119101138	119100629	119100827	119101017	119101138	339	0.00274174	0.048316	0.687,0.664	1.0,0.829	-0.239	449	ENSG00000167554.15	ZNF610	chr19	+	52347706	52347944	52347706	52347831	52349153	52349235	0.017316	0.204806	0.813,0.923	1.0,1.0
30350	ENSG00000186174.13	BCL9L	chr11	-	118918825	118918879	118909913	118910015	118925237	118925926	203	2.64347e-05	0.00297822	1.0,1.0	0.746,0.562	0.346		8085	ENSG00000117155.17	SSX2IP	chr1	-	84669680	84670815	84669680	84669893	84670645	84670815	901	0.00275224	0.048316	0.099,0.152	0.367,0.375	-0.245	6074	ENSG00000232677.9	LINC00665	chr19	-	36326052	36327225	36326481	36327225	36324925	36325764	0.017363	0.204806	1.0,0.392	1.0,0.699
51285	ENSG00000008311.16	AASS	chr7	-	122079148	122079327	122078861	122078950	122079596	122079690	328	2.63878e-05	0.00297822	0.092,0.0	0.431,0.761	-0.55		973	ENSG00000214174.8	AMZ2P1	chr17	-	64972753	64973517	64972753	64972927	64973241	64973517	463	0.00280213	0.0487974	0.617,0.287	0.055,0.097	0.376	6526	ENSG00000165699.15	TSC1	chr9	-	132911409	132911568	132911452	132911568	132911001	132911113	0.017733	0.208395	0.0,0.0	0.088,0.079
31075	ENSG00000137842.7	TMEM62	chr15	+	43146492	43146634	43135511	43135649	43148754	43148788	291	2.68283e-05	0.0030114	1.0,1.0	0.46,0.506	0.517		7756	ENSG00000164877.19	MICALL2	chr7	-	1440590	1442484	1440590	1440684	1442191	1442484	1656	0.00280588	0.0487974	0.44,1.0	1.0,1.0	-0.28	6066	ENSG00000170791.18	CHCHD7	chr8	+	56212761	56212909	56212761	56212889	56214597	56214667	0.018021	0.210999	0.638,1.0	0.815,0.469
47989	ENSG00000171603.18	CLSTN1	chr1	-	9756480	9756510	9755113	9755309	9773271	9773394	179	2.7338e-05	0.00305734	0.141,0.118	0.076,0.011	0.086		3768	ENSG00000144224.17	UBXN4	chr2	+	135753538	135754277	135753538	135753567	135754158	135754277	740	0.00282542	0.0489567	0.125,0.086	0.175,0.214	-0.089	7538	ENSG00000129933.21	MAU2	chr19	+	19347279	19347366	19347279	19347363	19348888	19348938	0.0180967	0.211106	0.797,0.595	0.94,0.864
28995	ENSG00000245958.6	SEPTIN7P14	chr4	+	119543752	119543845	119528739	119528789	119550378	119550443	242	2.75566e-05	0.00307049	0.921,1.0	0.621,0.526	0.387		3649	ENSG00000145247.12	OCIAD2	chr4	-	48892771	48894053	48892771	48892889	48894005	48894053	1265	0.00283983	0.0490261	0.105,0.371	1.0,0.414	-0.469	52	ENSG00000077279.20	DCX	chrX	-	111330903	111331041	111330918	111331041	111293778	111301743	0.0181683	0.211165	0.864,0.577	0.443,0.275
19133	ENSG00000242086.8	MUC20-OT1	chr3	+	195696360	195696589	195688532	195688797	195699029	195699116	378	2.77868e-05	0.00308485	0.479,0.496	1.0,1.0	-0.512		709	ENSG00000095066.12	HOOK2	chr19	-	12774668	12774897	12774668	12774741	12774811	12774897	219	0.00290673	0.0496935	1.0,0.803	0.0,0.773	0.515	5027	ENSG00000237765.8	FAM200B	chr4	+	15681755	15681968	15681755	15681901	15686235	15686462	0.0182788	0.211673	0.14,0.246	0.289,0.612
25462	ENSG00000160785.14	SLC25A44	chr1	+	156207861	156208013	156199834	156200472	156210239	156212795	301	2.79584e-05	0.00309261	0.856,0.497	1.0,1.0	-0.324		1329	ENSG00000090863.12	GLG1	chr16	-	74462487	74463479	74462487	74462630	74463355	74463479	874	0.00291012	0.0496935	0.023,0.02	0.037,0.055	-0.025	2431	ENSG00000145191.15	EIF2B5	chr3	+	184142236	184142394	184142236	184142378	184142501	184142603	0.0185704	0.214269	0.0,0.231	0.475,0.0
31642	ENSG00000115183.15	TANC1	chr2	+	159163282	159163546	159150369	159150556	159169249	159169372	413	2.82519e-05	0.00311375	0.966,1.0	0.693,0.862	0.206		3871	ENSG00000113240.13	CLK4	chr5	-	178616881	178618778	178616881	178616948	178617343	178618778	544	0.00289247	0.0496935	0.561,0.711	0.831,1.0	-0.279	7153	ENSG00000110274.16	CEP164	chr11	+	117380613	117380714	117380613	117380705	117381700	117381868	0.0189015	0.217299	0.159,0.173	0.0,0.095
58848	ENSG00000148541.13	FAM13C	chr10	-	59262433	59262645	59253716	59254443	59268552	59268691	361	2.84322e-05	0.00312231	0.553,0.539	1.0,1.0	-0.454		418	ENSG00000101365.21	IDH3B	chr20	-	2659698	2660176	2659698	2659793	2660067	2660176	423	0.00298636	0.0499716	0.821,1.0	0.6,0.76	0.231	2841	ENSG00000143801.18	PSEN2	chr1	+	226888828	226890965	226888828	226889049	226891277	226891361	0.0191002	0.218791	0.302,1.0	0.202,0.067
26647	ENSG00000188687.17	SLC4A5	chr2	-	74232468	74232647	74231235	74231308	74233401	74233563	328	2.96548e-05	0.0032442	1.0,0.232	0.0,0.0	0.616		1231	ENSG00000132522.16	GPS2	chr17	-	7314487	7315119	7314487	7314597	7314958	7315119	510	0.00297899	0.0499716	0.422,0.661	0.594,1.0	-0.255	4686	ENSG00000048140.18	TSPAN17	chr5	+	176656894	176656956	176656894	176656924	176657517	176659053	0.0192518	0.219733	0.59,0.622	0.901,0.805
42320	ENSG00000048342.18	CC2D2A	chr4	+	15574149	15574326	15570397	15570496	15579967	15580171	326	2.97555e-05	0.0032442	1.0,1.0	0.762,0.407	0.415		6114	ENSG00000183735.11	TBK1	chr12	+	64495698	64496406	64495698	64495775	64496366	64496406	740	0.00295388	0.0499716	0.118,0.103	0.012,0.032	0.088	5058	ENSG00000132429.10	POPDC3	chr6	-	105161424	105162160	105161795	105162160	105159710	105159819	0.0201317	0.228953	1.0,1.0	0.462,0.364
37522	ENSG00000187741.15	FANCA	chr16	-	89762637	89762793	89761948	89762022	89764889	89765066	305	2.99043e-05	0.00324878	0.21,0.246	0.0,0.0	0.228		6873	ENSG00000196305.19	IARS1	chr9	-	92242153	92243311	92242153	92242330	92243215	92243311	1034	0.00298939	0.0499716	0.027,0.028	0.015,0.011	0.015	1002	ENSG00000275700.6	AATF	chr17	+	37031613	37031689	37031613	37031685	37056605	37056871	0.0202962	0.23	0.661,0.0	1.0,1.0
18372	ENSG00000197712.12	FAM114A1	chr4	+	38868397	38868546	38867805	38867834	38878070	38878426	298	3.02228e-05	0.00327169	0.412,0.556	0.0,0.077	0.446		7302	ENSG00000120509.11	PDZD11	chrX	-	70289254	70289593	70289254	70289354	70289521	70289593	316	0.00299002	0.0499716	0.038,0.274	0.056,0.0	0.128	6887	ENSG00000133895.18	MEN1	chr11	-	64810267	64810551	64810513	64810551	64809664	64810132	0.0205135	0.230813	0.274,0.0	0.43,0.43
68470	ENSG00000068305.17	MEF2A	chr15	+	99703361	99703385	99690240	99690428	99706728	99706855	173	3.04121e-05	0.00328051	0.252,0.079	0.0,0.0	0.166		8278	ENSG00000155980.13	KIF5A	chr12	+	57575639	57576862	57575639	57575757	57576086	57576862	478	0.00297491	0.0499716	1.0,1.0	1.0,0.238	0.381	7402	ENSG00000173230.15	GOLGB1	chr3	-	121730847	121730973	121730875	121730973	121729864	121730017	0.0204745	0.230813	0.174,0.066	0.252,0.296
69297	ENSG00000128739.23	SNRPN	chr15	+	24920472	24920547	24920010	24920124	24958737	24958868	224	3.05927e-05	0.00328834	0.571,0.181	1.0,1.0	-0.624		8061	ENSG00000065000.19	AP3D1	chr19	-	2112859	2113413	2112859	2112967	2113335	2113413	517	0.00302598	0.0503939	0.257,0.278	0.178,0.0	0.179	1479	ENSG00000166855.9	CLPX	chr15	-	65156777	65156932	65156843	65156932	65155691	65155856	0.0206702	0.230938	0.133,0.047	0.294,0.257
11707	ENSG00000092531.10	SNAP23	chr15	+	42528261	42528420	42515236	42515354	42529674	42529804	308	3.08202e-05	0.00330113	1.0,1.0	0.753,0.916	0.165		2633	ENSG00000068796.19	KIF2A	chr5	+	62363177	62363899	62363177	62363320	62363694	62363899	523	0.00312456	0.0518523	0.176,0.114	0.026,0.078	0.093	2614	ENSG00000218510.9	LINC00339	chr1	+	22025510	22026119	22025510	22025639	22030279	22030617	0.0206684	0.230938	0.321,0.136	0.0,0.073
38769	ENSG00000115524.17	SF3B1	chr2	-	197418895	197419640	197418508	197418588	197420427	197420542	894	3.25489e-05	0.00347406	0.455,0.532	0.282,0.288	0.209		6207	ENSG00000105835.13	NAMPT	chr7	-	106269153	106272658	106269153	106269312	106272529	106272658	3366	0.00316779	0.0523852	0.093,0.056	0.022,0.035	0.046	151	ENSG00000100410.8	PHF5A	chr22	-	41468019	41468147	41468123	41468147	41467447	41467614	0.0208586	0.231723	0.133,0.078	0.402,0.227
33972	ENSG00000119414.12	PPP6C	chr9	-	125158240	125158382	125153905	125153985	125171084	125171180	291	3.31555e-05	0.00352643	0.867,0.804	1.0,1.0	-0.164		2439	ENSG00000204394.13	VARS1	chr6	-	31781690	31781952	31781690	31781761	31781846	31781952	234	0.00318543	0.0524928	0.047,0.075	0.019,0.0	0.051	3521	ENSG00000247134.7	RP11-11N9.4	chr8	+	32996200	32996355	32996200	32996316	33041634	33041771	0.0208865	0.231723	0.067,0.0	0.178,0.102
31133	ENSG00000090470.15	PDCD7	chr15	-	65119717	65119954	65119375	65119463	65129031	65129170	386	3.36561e-05	0.00356719	1.0,0.961	0.816,0.821	0.162		3381	ENSG00000154222.15	CC2D1B	chr1	-	52360423	52361132	52360423	52360549	52360973	52361132	573	0.00321955	0.0528702	1.0,1.0	1.0,0.394	0.303	3791	ENSG00000119185.13	ITGB1BP1	chr2	-	9412067	9412405	9412268	9412405	9408112	9408205	0.0210528	0.232755	0.136,0.108	0.061,0.0
53813	ENSG00000118961.15	LDAH	chr2	-	20801291	20801465	20790254	20790398	20823036	20823089	323	3.42497e-05	0.00361751	0.509,0.814	1.0,1.0	-0.339		5116	ENSG00000234741.8	GAS5	chr1	-	173865856	173866206	173865856	173865894	173866176	173866206	431	0.00323905	0.0530057	0.154,0.144	0.257,0.303	-0.131	1462	ENSG00000137817.17	PARP6	chr15	-	72260477	72260688	72260537	72260688	72259607	72259661	0.0213	0.233857	0.192,0.214	0.528,0.348
32643	ENSG00000108651.10	UTP6	chr17	-	31866654	31866715	31865365	31865438	31868045	31868112	210	3.4792e-05	0.00366207	0.074,0.113	0.0,0.0	0.093		5739	ENSG00000163818.19	LZTFL1	chr3	-	45834237	45835784	45834237	45834298	45835589	45835784	1440	0.00328571	0.0535832	0.02,0.003	0.02,0.062	-0.03	6239	ENSG00000060138.13	YBX3	chr12	-	10704050	10704148	10704059	10704148	10701959	10702134	0.0212806	0.233857	0.866,0.674	0.923,0.888
34003	ENSG00000144468.17	RHBDD1	chr2	+	226839408	226839627	226836043	226836087	226864603	226864711	368	3.52524e-05	0.00369773	0.646,0.84	0.0,0.288	0.599		4667	ENSG00000102103.17	PQBP1	chrX	+	48902232	48902795	48902232	48902517	48902731	48902795	363	0.00330328	0.053684	0.0,0.068	0.324,0.112	-0.184	6631	ENSG00000114439.19	BBX	chr3	+	107645835	107646087	107645835	107645909	107710451	107710622	0.0213889	0.234024	0.202,0.501	0.107,0.126
23721	ENSG00000148498.16	PARD3	chr10	-	34284134	34284245	34269656	34269899	34317106	34317338	260	3.54466e-05	0.00370533	0.364,0.656	1.0,1.0	-0.49		2057	ENSG00000010295.20	IFFO1	chr12	-	6548064	6548545	6548064	6548157	6548424	6548545	416	0.00332048	0.053778	1.0,1.0	0.851,0.642	0.254	2971	ENSG00000130414.13	NDUFA10	chr2	-	240021086	240021412	240021196	240021412	240018552	240018639	0.0216377	0.235933	0.052,0.048	0.025,0.019
4298	ENSG00000160229.13	ZNF66	chr19	+	20792511	20792638	20776303	20776450	20793782	20793878	276	3.56436e-05	0.00371316	0.447,0.351	1.0,1.0	-0.601		511	ENSG00000160014.17	CALM3	chr19	+	46605826	46608340	46605826	46605857	46608196	46608340	2488	0.00338429	0.0546238	0.025,0.027	0.04,0.042	-0.015	5216	ENSG00000124920.14	MYRF	chr11	+	61783850	61784027	61783850	61783925	61784279	61784385	0.0221048	0.240201	0.215,0.372	0.078,0.134
13073	ENSG00000146112.12	PPP1R18	chr6	-	30684407	30684544	30679178	30679389	30687113	30687193	286	3.65299e-05	0.00379251	1.0,1.0	0.833,0.892	0.137		644	ENSG00000105726.17	ATP13A1	chr19	-	19655315	19655654	19655315	19655453	19655527	19655654	223	0.00339845	0.0546652	0.055,0.0	0.188,0.082	-0.108	1824	ENSG00000249669.10	CARMN	chr5	+	149423185	149423639	149423185	149423309	149424089	149424397	0.0222459	0.240909	1.0,0.384	1.0,1.0
19524	ENSG00000182473.22	EXOC7	chr17	-	76090328	76090481	76089174	76089320	76091142	76091235	302	3.73018e-05	0.00385947	0.0,0.0	0.198,0.397	-0.297		4317	ENSG00000134253.10	TRIM45	chr1	-	117111059	117112453	117111059	117111212	117112094	117112453	1031	0.00341749	0.0547844	1.0,1.0	0.783,0.824	0.197	1752	ENSG00000075711.21	DLG1	chr3	-	197085295	197085756	197085579	197085756	197081050	197081117	0.0225762	0.243654	0.116,0.128	0.047,0.062
23228	ENSG00000075826.17	SEC31B	chr10	-	100509315	100509511	100509006	100509102	100516095	100516219	345	3.77196e-05	0.00388947	0.812,0.097	1.0,1.0	-0.545		258	ENSG00000070413.20	DGCR2	chr22	-	19041057	19041959	19041057	19041294	19041806	19041959	661	0.00352217	0.056081	0.332,0.279	0.759,0.67	-0.409	4528	ENSG00000111653.20	ING4	chr12	-	6652270	6652770	6652661	6652770	6651323	6651385	0.0229871	0.247248	0.79,1.0	0.939,1.0
46685	ENSG00000119977.22	TCTN3	chr10	-	95685555	95685636	95684498	95684624	95686494	95686530	230	3.84973e-05	0.00395625	0.895,0.81	1.0,1.0	-0.147		1161	ENSG00000177731.16	FLII	chr17	-	18244835	18245419	18244835	18245272	18245353	18245419	230	0.00351548	0.056081	0.393,0.393	0.0,0.115	0.336	212	ENSG00000161179.14	YDJC	chr22	-	21629542	21629761	21629601	21629761	21629307	21629407	0.0231201	0.247838	0.682,1.0	0.0,1.0
32086	ENSG00000167110.18	GOLGA2	chr9	-	128267193	128267274	128266286	128266325	128267457	128267517	230	3.89202e-05	0.00397286	0.346,0.195	0.694,1.0	-0.577		6246	ENSG00000008311.16	AASS	chr7	-	122098744	122101680	122098744	122098866	122101620	122101680	2903	0.00360943	0.057277	1.0,1.0	1.0,0.734	0.133	324	ENSG00000244687.12	UBE2V1	chr20	-	50096482	50096820	50096671	50096820	50084128	50084254	0.0234598	0.250633	0.134,0.075	0.171,0.168
38058	ENSG00000144034.16	TPRKB	chr2	-	73732583	73732700	73731905	73732285	73734428	73734588	266	3.88972e-05	0.00397286	0.0,0.0	0.23,0.055	-0.143		1334	ENSG00000157353.17	FCSK	chr16	+	70466881	70467471	70466881	70466954	70467373	70467471	568	0.00364657	0.0574601	0.44,1.0	1.0,1.0	-0.28	2349	ENSG00000247708.8	STX18-AS1	chr4	+	4542142	4542475	4542142	4542426	4544737	4544907	0.0239807	0.254484	1.0,0.53	0.693,1.0
18181	ENSG00000175348.11	TMEM9B	chr11	-	8962091	8962183	8956189	8956298	8964208	8964442	241	3.92833e-05	0.00398319	1.0,1.0	0.699,0.743	0.279		2678	ENSG00000145191.15	EIF2B5	chr3	+	184136611	184137805	184136611	184136736	184137619	184137805	1032	0.00365755	0.0574601	0.235,0.431	0.104,0.098	0.232	7029	ENSG00000167792.13	NDUFV1	chr11	+	67606957	67607324	67606957	67607076	67608395	67608478	0.0239718	0.254484	1.0,1.0	0.484,0.79
39430	ENSG00000157985.19	AGAP1	chr2	+	235718380	235718392	235717556	235717644	235740962	235741048	161	3.92798e-05	0.00398319	0.481,0.171	0.0,0.0	0.326		4508	ENSG00000008128.23	CDK11A	chr1	-	1703475	1703940	1703475	1703624	1703823	1703940	348	0.00364823	0.0574601	0.063,0.0	0.135,0.102	-0.087	2949	ENSG00000198860.14	TSEN15	chr1	+	184072156	184072298	184072156	184072194	184072826	184074212	0.0246154	0.259484	0.821,1.0	0.952,1.0
35855	ENSG00000134532.19	SOX5	chr12	-	24213342	24213417	23895792	23896024	24277215	24277312	224	4.01923e-05	0.00406183	0.0,0.571	1.0,1.0	-0.715		2831	ENSG00000161960.16	EIF4A1	chr17	+	7576523	7577165	7576523	7576692	7577055	7577165	512	0.00373871	0.0581536	0.041,0.03	0.058,0.049	-0.018	7749	ENSG00000155980.13	KIF5A	chr12	+	57550043	57550791	57550043	57550400	57563438	57563526	0.0245784	0.259484	0.216,0.044	0.387,0.216
41082	ENSG00000114999.8	TTL	chr2	+	112485916	112485995	112482155	112482501	112494142	112494375	228	4.17491e-05	0.00420519	0.303,0.59	1.0,0.878	-0.493		2870	ENSG00000173846.13	PLK3	chr1	+	44802954	44803391	44802954	44803153	44803267	44803391	263	0.00373342	0.0581536	0.131,0.0	0.214,0.215	-0.149	7164	ENSG00000186166.9	CENATAC	chr11	+	119011220	119011311	119011220	119011283	119011938	119012003	0.0248708	0.261308	0.716,0.716	0.627,1.0
8619	ENSG00000103194.16	USP10	chr16	+	84740308	84740369	84733137	84733503	84758715	84758807	210	4.28251e-05	0.00429933	0.822,0.554	1.0,1.0	-0.312		6829	ENSG00000197912.16	SPG7	chr16	+	89554485	89557747	89554485	89556085	89556886	89557747	950	0.00373531	0.0581536	1.0,1.0	0.463,1.0	0.268	1133	ENSG00000131165.16	CHMP1A	chr16	-	89653798	89653923	89653903	89653923	89651568	89651646	0.0252186	0.263219	0.0,0.184	0.227,0.272
30514	ENSG00000181555.21	SETD2	chr3	-	47080915	47081083	47067069	47067118	47083719	47084382	317	4.35124e-05	0.00435396	0.0,0.053	0.246,0.163	-0.178		3186	ENSG00000102878.18	HSF4	chr16	+	67169278	67169945	67169278	67169348	67169630	67169945	431	0.0037678	0.0584133	1.0,1.0	0.409,0.409	0.591	1594	ENSG00000135333.15	EPHA7	chr6	-	93254577	93254796	93254646	93254796	93246791	93246985	0.0252134	0.263219	0.132,0.089	0.0,0.0
62191	ENSG00000127957.18	PMS2P3	chr7	-	75512308	75512421	75510930	75511114	75512588	75512675	262	4.37043e-05	0.00435882	0.857,0.577	1.0,1.0	-0.283		4480	ENSG00000164088.18	PPM1M	chr3	+	52248152	52248453	52248152	52248237	52248334	52248453	246	0.003801	0.0587348	0.752,0.232	1.0,0.548	-0.282	1595	ENSG00000135333.15	EPHA7	chr6	-	93269476	93269660	93269491	93269660	93264593	93264702	0.0256657	0.267007	0.732,0.645	1.0,0.732
1878	ENSG00000160285.15	LSS	chr21	-	46219475	46219572	46216388	46216524	46221853	46221975	246	4.42062e-05	0.00438953	0.976,0.979	0.805,0.797	0.176		4237	ENSG00000197989.14	SNHG12	chr1	-	28580559	28581229	28580559	28580646	28581110	28581229	613	0.0038201	0.0588371	0.79,0.822	1.0,1.0	-0.194	5688	ENSG00000157212.19	PAXIP1	chr7	-	154947831	154948003	154947902	154948003	154946678	154946813	0.0258761	0.268317	0.0,0.088	0.0,0.475
37671	ENSG00000267106.8	ZNF561-AS1	chr19	+	9626783	9626860	9621486	9621645	9632227	9632417	226	4.43008e-05	0.00438953	0.18,0.248	0.725,0.856	-0.577		2212	ENSG00000100714.17	MTHFD1	chr14	+	64440125	64441453	64440125	64440266	64441384	64441453	1267	0.00390609	0.0599655	0.053,0.045	0.11,0.076	-0.044	5364	ENSG00000111879.20	FAM184A	chr6	-	118961760	118961963	118961928	118961963	118959828	118960184	0.0260218	0.268948	1.0,1.0	1.0,0.385
40856	ENSG00000196208.14	GREB1	chr2	+	11562462	11562582	11556352	11556771	11566479	11566656	269	4.5525e-05	0.00449618	1.0,1.0	0.769,0.714	0.258		7218	ENSG00000130640.15	TUBGCP2	chr10	-	133283881	133285213	133283881	133284002	133285084	133285213	1231	0.00394923	0.0604309	0.027,0.017	0.045,0.042	-0.021	7050	ENSG00000105053.11	VRK3	chr19	-	50025266	50025372	50025345	50025372	50020584	50020647	0.0263628	0.271588	0.0,0.157	0.14,0.272
17411	ENSG00000124357.13	NAGK	chr2	+	71075554	71076701	71072640	71073594	71077557	71077636	1296	4.57542e-05	0.0045042	1.0,1.0	0.58,0.599	0.411		6853	ENSG00000135047.16	CTSL	chr9	+	87728026	87728396	87728026	87728149	87728249	87728396	249	0.00410597	0.062626	0.23,0.545	0.0,0.0	0.388	469	ENSG00000104951.16	IL4I1	chr19	-	49929325	49929496	49929416	49929496	49927693	49927815	0.026473	0.271841	1.0,0.651	0.134,1.0
11413	ENSG00000069956.13	MAPK6	chr15	+	52042753	52042833	52004179	52004402	52045829	52046109	229	4.66163e-05	0.00457426	0.394,0.394	1.0,1.0	-0.606		2369	ENSG00000070061.16	ELP1	chr9	-	108916203	108919349	108916203	108916297	108917546	108919349	1398	0.00414292	0.0629857	0.026,0.014	0.074,0.096	-0.065	1112	ENSG00000074356.17	NCBP3	chr17	-	3823792	3825050	3824941	3825050	3821952	3822052	0.0271847	0.276465	0.672,0.597	0.408,0.498
61992	ENSG00000118200.14	CAMSAP2	chr1	+	200828572	200828605	200815560	200815644	200832199	200832341	182	4.72616e-05	0.00462267	0.29,0.223	0.0,0.0	0.257		3413	ENSG00000123473.17	STIL	chr1	-	47299904	47300152	47299904	47299968	47300109	47300152	290	0.00417941	0.0633362	0.837,0.578	0.673,1.0	-0.129	2371	ENSG00000075407.18	ZNF37A	chr10	+	38095537	38095633	38095537	38095629	38095743	38095804	0.0270368	0.276465	0.327,0.394	0.135,0.226
52009	ENSG00000013374.17	NUB1	chr7	+	151374096	151374243	151368734	151368887	151375847	151375943	296	4.78284e-05	0.00466312	1.0,0.638	0.201,0.0	0.718		4441	ENSG00000184661.14	CDCA2	chr8	+	25460239	25460554	25460239	25460300	25460383	25460554	232	0.0041988	0.063426	0.259,0.222	0.078,0.111	0.146	5899	ENSG00000102901.13	CENPT	chr16	-	67832227	67832545	67832454	67832545	67832011	67832108	0.0271405	0.276465	0.899,0.933	0.717,0.79
26572	ENSG00000154556.18	SORBS2	chr4	-	185684753	185684846	185678795	185678822	185775226	185775366	242	4.8048e-05	0.00466956	0.339,0.316	0.587,0.57	-0.251		5586	ENSG00000172053.18	QARS1	chr3	-	49098352	49098692	49098352	49098480	49098599	49098692	268	0.00423684	0.0637963	0.065,0.65	0.085,0.0	0.315	3910	ENSG00000106948.17	AKNA	chr9	-	114343707	114346009	114345862	114346009	114342008	114342125	0.0273239	0.276993	0.777,0.603	1.0,1.0
25463	ENSG00000160785.14	SLC25A44	chr1	+	156207885	156208013	156196204	156200472	156210239	156212795	277	4.82333e-05	0.00467264	0.879,0.518	1.0,1.0	-0.301		8038	ENSG00000126581.13	BECN1	chr17	-	42818786	42819609	42818786	42818877	42819547	42819609	819	0.00433748	0.0651036	0.141,0.137	0.295,0.305	-0.161	6011	ENSG00000099250.18	NRP1	chr10	-	33202890	33202995	33202911	33202995	33197649	33197709	0.0281362	0.284319	0.622,0.707	0.86,0.86
7913	ENSG00000176974.20	SHMT1	chr17	-	18353671	18353817	18347495	18347656	18355885	18356000	295	4.85692e-05	0.00469024	1.0,1.0	1.0,0.0	0.5		495	ENSG00000104870.13	FCGRT	chr19	+	49513881	49514486	49513881	49514133	49514210	49514486	226	0.00438321	0.0652899	0.086,0.0	0.274,0.248	-0.218	4010	ENSG00000134030.14	CTIF	chr18	+	48757918	48758411	48757918	48758405	48761389	48761689	0.0284897	0.286101	0.622,0.837	0.452,0.445
37153	ENSG00000188313.13	PLSCR1	chr3	-	146536539	146536565	146533469	146533550	146544466	146544530	175	4.87973e-05	0.00469736	0.561,0.674	0.951,0.927	-0.322		3012	ENSG00000164050.13	PLXNB1	chr3	-	48413068	48413818	48413068	48413169	48413669	48413818	649	0.00439567	0.0652899	0.479,1.0	0.408,0.256	0.408	7454	ENSG00000166598.16	HSP90B1	chr12	+	103943073	103943573	103943073	103943319	103943737	103943874	0.0284929	0.286101	0.008,0.011	0.011,0.026
27447	ENSG00000163312.11	HELQ	chr4	-	83446834	83447035	83446013	83446086	83448782	83448961	350	4.90321e-05	0.00470507	0.532,0.68	1.0,1.0	-0.394		4670	ENSG00000250722.6	SELENOP	chr5	-	42804655	42807108	42804655	42804773	42806895	42807108	2271	0.0044053	0.0652899	0.026,0.034	0.101,0.057	-0.049	4268	ENSG00000139624.14	CERS5	chr12	-	50134399	50134702	50134545	50134702	50129798	50130694	0.0288519	0.288792	0.027,0.155	0.0,0.0
64848	ENSG00000123411.15	IKZF4	chr12	+	56019317	56019415	56018125	56018177	56025053	56025158	247	5.01145e-05	0.00479382	0.0,0.0	0.644,0.376	-0.51		7853	ENSG00000092841.19	MYL6	chr12	+	56159586	56160148	56159586	56159622	56159974	56160148	501	0.00438894	0.0652899	0.841,0.974	1.0,0.975	-0.08	4201	ENSG00000173406.16	DAB1	chr1	-	57062883	57062943	57062889	57062943	57025980	57026043	0.0289497	0.28886	0.917,1.0	0.755,0.951
21134	ENSG00000188818.12	ZDHHC11	chr5	-	823388	823809	821860	821895	825163	825251	570	5.18782e-05	0.00494697	1.0,0.773	0.173,0.478	0.561		6575	ENSG00000178035.13	IMPDH2	chr3	-	49026686	49027047	49026686	49026886	49026959	49027047	222	0.0044274	0.0654117	0.144,0.155	0.374,0.289	-0.182	3860	ENSG00000127586.17	CHTF18	chr16	+	788623	788775	788623	788756	788930	789125	0.0293185	0.289805	0.876,1.0	0.639,1.0
34223	ENSG00000214870.9	AC004540.5	chr7	+	26403395	26403517	26398852	26399021	26493794	26494263	271	5.22563e-05	0.00496745	1.0,1.0	0.355,0.452	0.597		1518	ENSG00000131652.14	THOC6	chr16	+	3025923	3026288	3025923	3025988	3026250	3026288	411	0.00453419	0.0659556	0.42,1.0	1.0,1.0	-0.29	4529	ENSG00000111653.20	ING4	chr12	-	6652935	6653050	6652944	6653050	6652661	6652767	0.0292461	0.289805	0.519,0.767	1.0,0.803
64866	ENSG00000092841.19	MYL6	chr12	+	56159586	56159622	56158683	56158711	56159974	56160148	185	5.41167e-05	0.00512828	0.491,0.168	0.0,0.0	0.33		1852	ENSG00000124574.15	ABCC10	chr6	+	43437933	43438795	43437933	43438013	43438623	43438795	759	0.00449589	0.0659556	0.191,0.44	0.495,1.0	-0.432	4708	ENSG00000179915.24	NRXN1	chr2	-	49943703	49943791	49943712	49943791	49918504	49922251	0.0292022	0.289805	0.809,0.68	0.485,0.32
6024	ENSG00000169710.9	FASN	chr17	-	82087953	82088034	82087684	82087861	82088115	82088307	230	5.51759e-05	0.00521241	1.0,1.0	0.493,0.854	0.327		6867	ENSG00000155229.21	MMS19	chr10	-	97461495	97461896	97461495	97461622	97461827	97461896	354	0.0045293	0.0659556	0.195,0.164	0.082,0.1	0.088	5692	ENSG00000151612.18	ZNF827	chr4	-	145764974	145765165	145764978	145765165	145763089	145763122	0.0295564	0.29125	0.163,0.0	0.796,0.0
62789	ENSG00000182141.10	ZNF708	chr19	-	21327959	21328141	21310500	21310627	21329209	21329425	331	5.58815e-05	0.00526273	0.351,0.252	0.0,0.0	0.301		7661	ENSG00000140043.12	PTGR2	chr14	+	73876997	73880176	73876997	73877168	73880054	73880176	3035	0.00450969	0.0659556	0.155,0.371	0.39,1.0	-0.432	3542	ENSG00000147642.17	SYBU	chr8	-	109586016	109586162	109586059	109586162	109579798	109580002	0.0299999	0.294348	0.026,0.181	0.066,0.376
41101	ENSG00000135976.20	ANKRD36	chr2	+	97209680	97209709	97207810	97207839	97209799	97209872	178	5.69939e-05	0.00535092	0.456,0.307	0.056,0.071	0.318		7682	ENSG00000111665.12	CDCA3	chr12	-	6849322	6849858	6849322	6849413	6849564	6849858	300	0.0045042	0.0659556	0.498,1.0	0.398,0.373	0.363	4114	ENSG00000132323.9	ILKAP	chr2	-	238194781	238194870	238194804	238194870	238194274	238194331	0.0300563	0.294348	0.325,0.271	0.581,0.483
9551	ENSG00000101294.18	HM13	chr20	+	31568077	31568280	31561633	31561736	31569119	31569541	352	5.73433e-05	0.00536715	0.864,0.261	1.0,1.0	-0.438		7519	ENSG00000175634.15	RPS6KB2	chr11	+	67434581	67435401	67434581	67434694	67434988	67435401	443	0.00464093	0.0673006	0.144,0.0	0.144,0.502	-0.251	3350	ENSG00000080802.19	CNOT4	chr7	-	135410514	135410648	135410523	135410648	135398168	135398226	0.0303155	0.295972	0.251,0.42	0.212,0.146
34450	ENSG00000162669.16	HFM1	chr1	-	91396292	91396405	91394092	91394402	91401011	91401109	262	5.77447e-05	0.00538815	0.221,0.0	0.363,1.0	-0.571		1676	ENSG00000213614.11	HEXA	chr15	-	72347685	72348134	72347685	72347758	72348047	72348134	438	0.00471666	0.0681315	0.731,0.671	0.185,0.28	0.469	5519	ENSG00000108591.10	DRG2	chr17	+	18093812	18093973	18093812	18093968	18098269	18098359	0.031035	0.302068	0.795,1.0	1.0,0.744
48739	ENSG00000197746.14	PSAP	chr10	-	71823887	71823896	71821875	71822007	71825836	71825893	158	5.80234e-05	0.0053976	0.126,0.119	0.068,0.072	0.052		5510	ENSG00000251022.6	THAP9-AS1	chr4	-	82900076	82900566	82900076	82900223	82900333	82900566	259	0.00472714	0.0681315	0.0,0.0	0.365,0.05	-0.207	133	ENSG00000079974.18	RABL2B	chr22	-	50769424	50769549	50769454	50769549	50769040	50769124	0.0313046	0.303554	0.172,0.0	0.0,0.4
24831	ENSG00000143258.16	USP21	chr1	+	161160365	161160506	161159449	161159678	161160619	161161240	290	5.88601e-05	0.00545874	0.507,0.0	1.0,1.0	-0.746		3416	ENSG00000115556.14	PLCD4	chr2	+	218633604	218634221	218633604	218633761	218634104	218634221	492	0.00477405	0.0685978	1.0,0.663	1.0,0.933	-0.135	1725	ENSG00000235823.3	OLMALINC	chr10	+	100373567	100374083	100373567	100374012	100380982	100381109	0.0314747	0.303554	0.058,0.203	0.0,0.0
12418	ENSG00000112695.12	COX7A2	chr6	-	75240276	75240385	75237786	75237988	75241175	75241265	258	5.9167e-05	0.00547052	0.447,0.614	0.126,0.0	0.467		2141	ENSG00000197081.16	IGF2R	chr6	+	160088032	160089253	160088032	160088147	160089106	160089253	1108	0.00479651	0.0687111	0.147,0.119	0.057,0.079	0.065	2384	ENSG00000242086.8	MUC20-OT1	chr3	+	195708133	195708435	195708133	195708268	195708746	195708801	0.031454	0.303554	0.414,0.654	1.0,0.702
53794	ENSG00000123124.14	WWP1	chr8	+	86398571	86398638	86381504	86381629	86402018	86402203	216	5.98289e-05	0.00551496	0.509,0.746	0.873,1.0	-0.309		1485	ENSG00000171456.20	ASXL1	chr20	+	32428127	32428422	32428127	32428248	32428324	32428422	225	0.00484444	0.0691874	0.129,0.058	0.0,0.048	0.07	6062	ENSG00000167904.15	TMEM68	chr8	-	55773226	55773378	55773268	55773378	55763935	55763980	0.0315852	0.303696	0.269,0.226	0.0,0.238
40055	ENSG00000007341.19	ST7L	chr1	-	112555867	112556018	112541950	112542090	112576985	112577088	300	6.03569e-05	0.00554681	1.0,1.0	0.332,0.498	0.585		5833	ENSG00000155906.20	RMND1	chr6	-	151421244	151423631	151421244	151422605	151423524	151423631	1068	0.00487074	0.069343	1.0,1.0	0.386,0.661	0.476	375	ENSG00000000419.14	DPM1	chr20	-	50945736	50945923	50945846	50945923	50942030	50942126	0.0324949	0.3056	0.905,0.896	1.0,1.0
2709	ENSG00000101084.18	RAB5IF	chr20	+	36607889	36608000	36607714	36607818	36612009	36612557	260	6.05891e-05	0.00555138	0.276,0.276	0.741,1.0	-0.595		7255	ENSG00000256269.10	HMBS	chr11	+	119088634	119089131	119088634	119088707	119089081	119089131	523	0.00488476	0.069343	0.119,0.146	0.044,0.044	0.089	744	ENSG00000152240.13	HAUS1	chr18	+	46105193	46105408	46105193	46105368	46118180	46118316	0.03265	0.3056	0.0,0.0	0.059,0.047
35762	ENSG00000163006.12	CCDC138	chr2	+	108873450	108873589	108856793	108856970	108876087	108876578	288	6.37182e-05	0.00582055	0.571,0.66	0.962,0.848	-0.29		2686	ENSG00000145191.15	EIF2B5	chr3	+	184143051	184144224	184143051	184143565	184144098	184144224	682	0.00490362	0.0694016	0.139,0.26	0.455,0.341	-0.199	1288	ENSG00000178188.15	SH2B1	chr16	+	28872533	28872758	28872533	28872705	28873169	28873269	0.0321561	0.3056	0.24,0.0	0.056,0.0
14869	ENSG00000206149.10	HERC2P9	chr15	+	28655494	28655691	28655272	28655420	28657186	28657325	346	6.57832e-05	0.00599111	1.0,1.0	0.577,0.918	0.252		660	ENSG00000099330.9	OCEL1	chr19	+	17226692	17227199	17226692	17226869	17226993	17227199	273	0.00497675	0.0700558	0.441,1.0	1.0,0.897	-0.228	1440	ENSG00000041357.16	PSMA4	chr15	+	78542176	78542645	78542176	78542219	78544189	78544267	0.0324616	0.3056	0.941,0.913	0.96,1.0
27210	ENSG00000144893.12	MED12L	chr3	+	151409242	151409332	151394655	151394867	151411277	151411507	239	6.59792e-05	0.00599111	0.757,1.0	0.384,0.483	0.445		5801	ENSG00000177666.17	PNPLA2	chr11	+	823693	824130	823693	823855	823997	824130	291	0.00497957	0.0700558	0.133,0.0	0.374,0.136	-0.189	3041	ENSG00000182919.15	C11orf54	chr11	+	93741962	93742141	93741962	93742066	93747296	93747448	0.0325727	0.3056	1.0,1.0	1.0,0.818
13654	ENSG00000162650.17	ATXN7L2	chr1	+	109489282	109489706	109488846	109489100	109489929	109490128	573	6.68666e-05	0.00603566	1.0,0.565	0.206,0.094	0.632		2199	ENSG00000168002.12	POLR2G	chr11	+	62761794	62762866	62761794	62761904	62762541	62762866	786	0.00504525	0.0705586	0.763,0.711	0.807,1.0	-0.166	5756	ENSG00000142794.19	NBPF3	chr1	+	21478143	21478307	21478143	21478196	21479348	21479400	0.0322765	0.3056	1.0,1.0	1.0,0.433
52547	ENSG00000168487.20	BMP1	chr8	+	22177566	22177732	22176923	22177139	22177851	22177906	315	6.67221e-05	0.00603566	0.073,0.0	0.623,0.275	-0.413		8086	ENSG00000089693.11	MLF2	chr12	-	6750176	6750766	6750176	6750305	6750712	6750766	556	0.00504356	0.0705586	0.066,0.025	0.107,0.108	-0.062	5763	ENSG00000127980.16	PEX1	chr7	-	92489713	92489911	92489718	92489911	92489292	92489423	0.0325373	0.3056	0.871,1.0	0.721,0.939
14007	ENSG00000155508.14	CNOT8	chr5	+	154859694	154859873	154858624	154858768	154863206	154863395	328	6.74699e-05	0.00607209	0.0,0.028	0.132,0.284	-0.194		2592	ENSG00000174243.10	DDX23	chr12	-	48837280	48837657	48837280	48837393	48837523	48837657	279	0.00509545	0.0708969	0.161,0.056	0.299,0.31	-0.196	7450	ENSG00000075089.10	ACTR6	chr12	+	100205675	100205757	100205675	100205744	100207662	100207786	0.0324578	0.3056	0.103,0.0	0.251,0.0
6674	ENSG00000141376.23	BCAS3	chr17	+	60688019	60688195	60683981	60684036	60689685	60689761	325	6.87529e-05	0.00611518	0.0,0.0	1.0,0.314	-0.657		6882	ENSG00000185963.14	BICD2	chr9	-	92711362	92715463	92711362	92713461	92715252	92715463	1940	0.00510652	0.0708969	0.539,0.897	0.921,0.93	-0.208	7794	ENSG00000198053.12	SIRPA	chr20	+	1934714	1934766	1934714	1934754	1937319	1940592	0.0321272	0.3056	0.188,0.0	1.0,0.188
15716	ENSG00000185619.18	PCGF3	chr4	+	732399	732498	730969	731110	733671	733789	248	6.853e-05	0.00611518	0.038,0.035	0.137,0.134	-0.099		8422	ENSG00000224078.15	SNHG14	chr15	+	25093833	25095828	25093833	25093974	25095718	25095828	1893	0.00511457	0.0708969	0.858,0.839	1.0,0.93	-0.117	6513	ENSG00000005810.19	MYCBP2	chr13	-	77076750	77076849	77076759	77076849	77070630	77070711	0.0328403	0.306477	0.586,0.0	1.0,0.0
54026	ENSG00000132549.20	VPS13B	chr8	+	99507136	99507203	99502835	99502950	99507769	99507911	216	6.85576e-05	0.00611518	0.828,0.892	0.408,0.349	0.482		8130	ENSG00000151923.18	TIAL1	chr10	-	119576610	119577203	119576610	119576750	119577079	119577203	478	0.00517845	0.0715719	0.596,0.511	0.957,0.682	-0.266	1450	ENSG00000179335.20	CLK3	chr15	+	74620008	74622216	74620008	74620225	74622493	74622560	0.0333489	0.310311	0.404,0.679	1.0,0.683
62212	ENSG00000131626.19	PPFIA1	chr11	+	70350993	70351023	70348188	70348420	70354300	70354452	179	6.84557e-05	0.00611518	0.02,0.056	0.316,0.25	-0.245		1715	ENSG00000140263.15	SORD	chr15	+	45040407	45043421	45040407	45040441	45043256	45043421	2964	0.00524924	0.0721273	0.222,0.395	1.0,0.413	-0.398	208	ENSG00000186716.21	BCR	chr22	+	23311696	23311918	23311696	23311836	23312886	23313021	0.0335776	0.311526	0.114,0.125	0.0,0.075
32879	ENSG00000198925.12	ATG9A	chr2	-	219228433	219228485	219227921	219228053	219229009	219229174	201	6.94445e-05	0.00615869	0.372,0.87	1.0,1.0	-0.379		2560	ENSG00000124356.17	STAMBP	chr2	+	73828960	73829510	73828960	73828996	73829404	73829510	557	0.00524889	0.0721273	1.0,0.616	1.0,1.0	-0.192	1299	ENSG00000103319.12	EEF2K	chr16	+	22258493	22258827	22258493	22258695	22260461	22260529	0.0337556	0.312264	0.0,0.0	0.132,0.117
36838	ENSG00000143815.15	LBR	chr1	-	225415277	225415332	225411336	225411440	225417983	225418180	204	7.13482e-05	0.00629467	0.422,0.422	1.0,1.0	-0.578		3365	ENSG00000162836.12	ACP6	chr1	-	147647367	147648411	147647367	147647566	147648245	147648411	828	0.00528168	0.0721596	0.539,0.618	1.0,0.73	-0.286	5091	ENSG00000136531.19	SCN2A	chr2	+	165295772	165296892	165295772	165296090	165297016	165297135	0.0339947	0.312652	1.0,0.135	1.0,0.32
67011	ENSG00000159720.12	ATP6V0D1	chr16	-	67453543	67453715	67443098	67443178	67480956	67481086	321	7.13916e-05	0.00629467	0.65,0.836	1.0,1.0	-0.257		3725	ENSG00000143387.14	CTSK	chr1	-	150804020	150806016	150804020	150804239	150805860	150806016	1770	0.00528221	0.0721596	0.156,0.296	0.027,0.07	0.177	7733	ENSG00000100889.12	PCK2	chr14	+	24094310	24094845	24094310	24094434	24096891	24097137	0.0339568	0.312652	0.179,0.25	0.21,0.0
26292	ENSG00000217128.12	FNIP1	chr5	-	131710577	131710661	131709200	131709272	131716564	131716656	233	7.24045e-05	0.00636553	0.836,0.823	1.0,1.0	-0.171		2364	ENSG00000070061.16	ELP1	chr9	-	108896495	108897038	108896495	108896644	108896890	108897038	395	0.00530739	0.072294	0.601,0.694	1.0,0.841	-0.273	4368	ENSG00000043514.17	TRIT1	chr1	-	39850118	39850261	39850122	39850261	39847985	39848097	0.0345377	0.316729	0.676,0.438	0.745,0.836
32876	ENSG00000198925.12	ATG9A	chr2	-	219228433	219228482	219227921	219228053	219229009	219229325	198	7.43777e-05	0.00652016	0.311,0.871	1.0,1.0	-0.409		7723	ENSG00000135297.17	MTO1	chr6	+	73466208	73466606	73466208	73466408	73466488	73466606	229	0.00533854	0.0725088	0.061,0.0	1.0,0.342	-0.641	820	ENSG00000185504.17	FAAP100	chr17	-	81551731	81552052	81551927	81552052	81550247	81551203	0.0346661	0.31699	0.694,0.463	0.351,0.341
52659	ENSG00000104228.13	TRIM35	chr8	-	27290155	27290178	27289161	27289280	27294079	27294135	172	7.47094e-05	0.00653042	1.0,1.0	0.464,0.302	0.617		642	ENSG00000105726.17	ATP13A1	chr19	-	19647413	19647759	19647413	19647528	19647598	19647759	219	0.00542004	0.0734041	0.0,0.141	0.301,0.214	-0.187	1423	ENSG00000140543.15	DET1	chr15	-	88530622	88531715	88531612	88531715	88527598	88527786	0.034913	0.31833	0.766,1.0	1.0,1.0
1439	ENSG00000100320.23	RBFOX2	chr22	-	35756104	35756144	35746472	35746561	35759887	35760020	189	7.52609e-05	0.00655978	0.846,0.878	0.947,0.987	-0.105		2016	ENSG00000137221.14	TJAP1	chr6	+	43503622	43506553	43503622	43503706	43504760	43506553	1203	0.00548328	0.0740478	0.408,0.287	0.634,0.74	-0.34	1394	ENSG00000130731.16	METTL26	chr16	-	635517	635774	635611	635774	635280	635340	0.0352811	0.319848	0.039,0.143	0.29,0.218
45200	ENSG00000145088.9	EAF2	chr3	+	121854686	121854823	121844452	121844547	121857010	121857156	286	7.65953e-05	0.006657	0.0,0.229	1.0,0.676	-0.724		67	ENSG00000085224.23	ATRX	chrX	-	77681519	77684593	77681519	77683451	77683538	77684593	236	0.00557623	0.0750879	0.924,0.964	1.0,0.988	-0.05	4199	ENSG00000166435.16	XRRA1	chr11	-	74933800	74933872	74933824	74933872	74930299	74930372	0.0352273	0.319848	1.0,0.812	0.564,0.721
59597	ENSG00000095637.23	SORBS1	chr10	-	95351215	95351376	95346405	95346452	95354881	95354967	310	7.69296e-05	0.00666701	0.419,0.161	0.0,0.0	0.29		817	ENSG00000099817.12	POLR2E	chr19	-	1093903	1095375	1093903	1094078	1095258	1095375	1329	0.00565523	0.0755046	0.067,0.022	0.0,0.018	0.035	5024	ENSG00000247828.8	TMEM161B-AS1	chr5	+	88270525	88270741	88270525	88270585	88282041	88282106	0.0356083	0.321895	0.196,0.178	0.423,0.411
32293	ENSG00000034053.15	APBA2	chr15	+	29053844	29054835	28995752	28995806	29074920	29075001	1140	7.83232e-05	0.00676851	0.937,0.656	1.0,1.0	-0.204		4361	ENSG00000196655.12	TRAPPC4	chr11	+	119018765	119019317	119018765	119018970	119019142	119019317	321	0.00565072	0.0755046	0.0,0.067	0.481,0.117	-0.265	209	ENSG00000100038.20	TOP3B	chr22	-	21962127	21962602	21962428	21962602	21960320	21960449	0.0364393	0.325695	0.484,0.537	0.279,0.221
50704	ENSG00000126746.18	ZNF384	chr12	-	6678662	6678710	6678126	6678460	6678945	6679183	197	7.99694e-05	0.00689118	0.396,0.431	0.671,0.787	-0.316		5893	ENSG00000108591.10	DRG2	chr17	+	18099632	18100435	18099632	18099715	18100362	18100435	796	0.00563422	0.0755046	0.709,0.652	1.0,1.0	-0.32	4028	ENSG00000132196.16	HSD17B7	chr1	+	162797801	162798935	162797801	162797916	162799742	162799937	0.036137	0.325695	0.177,0.109	0.085,0.073
58104	ENSG00000163520.14	FBLN2	chr3	+	13626444	13626579	13619729	13619831	13627831	13627969	284	8.11047e-05	0.00694965	0.84,0.611	1.0,1.0	-0.274		933	ENSG00000161547.17	SRSF2	chr17	-	76734114	76736464	76734114	76735158	76736153	76736464	1144	0.00581951	0.0770431	0.074,0.081	0.098,0.139	-0.041	4485	ENSG00000166881.10	NEMP1	chr12	-	57070673	57070893	57070819	57070893	57069233	57069306	0.0364179	0.325695	0.962,0.858	1.0,0.946
65619	ENSG00000151572.18	ANO4	chr12	+	100922225	100922330	100901645	100901840	100939314	100939451	254	8.1001e-05	0.00694965	0.451,0.854	1.0,1.0	-0.348		1387	ENSG00000103479.17	RBL2	chr16	+	53469915	53470663	53469915	53470185	53470382	53470663	346	0.005808	0.0770431	0.204,0.192	0.089,0.09	0.109	6152	ENSG00000108465.15	CDK5RAP3	chr17	+	47973518	47973696	47973518	47973650	47973930	47974031	0.0362933	0.325695	0.085,0.0	0.051,0.135
57914	ENSG00000263072.8	ZNF213-AS1	chr16	-	3132849	3132945	3131746	3132103	3134629	3134873	245	8.16206e-05	0.00697421	0.148,0.0	1.0,0.646	-0.749		5638	ENSG00000115649.16	CNPPD1	chr2	-	219174777	219175108	219174777	219174906	219174987	219175108	230	0.00581721	0.0770431	0.0,0.156	0.245,0.564	-0.326	5781	ENSG00000106290.15	TAF6	chr7	-	100114053	100114268	100114083	100114268	100113867	100113954	0.03666	0.326748	0.879,0.976	1.0,1.0
30940	ENSG00000008869.12	HEATR5B	chr2	-	37070229	37070387	37068680	37068930	37075484	37075634	307	8.21967e-05	0.00700376	1.0,1.0	0.327,0.327	0.673		6433	ENSG00000140988.16	RPS2	chr16	-	1962060	1962656	1962060	1962270	1962496	1962656	375	0.00588041	0.0772906	0.007,0.009	0.018,0.012	-0.007	2829	ENSG00000196465.10	MYL6B	chr12	+	56155418	56155592	56155418	56155493	56157467	56157545	0.0368038	0.32711	1.0,0.794	0.942,1.0
45873	ENSG00000115020.17	PIKFYVE	chr2	+	208285725	208285933	208273583	208273733	208288728	208288818	357	8.50641e-05	0.0072077	0.799,0.834	1.0,1.0	-0.183		6981	ENSG00000130714.19	POMT1	chr9	+	131507367	131509022	131507367	131507514	131508910	131509022	1545	0.00585941	0.0772906	0.563,0.653	0.207,0.355	0.327	2653	ENSG00000171365.17	CLCN5	chrX	+	49923406	49923741	49923406	49923482	49925170	49925314	0.0370379	0.327631	0.0,0.073	1.0,0.268
56670	ENSG00000165626.18	BEND7	chr10	-	13446484	13446541	13442979	13443403	13447265	13447316	206	8.49115e-05	0.0072077	1.0,0.591	0.0,0.0	0.795		8101	ENSG00000170919.16	TPT1-AS1	chr13	+	45378529	45379335	45378529	45378671	45379194	45379335	672	0.0058874	0.0772906	0.334,0.347	0.236,0.158	0.144	7419	ENSG00000087274.18	ADD1	chr4	+	2908514	2909431	2908514	2908604	2914883	2915040	0.0370689	0.327631	0.079,0.055	0.043,0.047
16371	ENSG00000135643.5	KCNMB4	chr12	+	70422706	70422849	70400209	70400336	70430484	70430686	292	8.53317e-05	0.00721029	0.023,0.0	0.095,0.13	-0.101		3882	ENSG00000134107.5	BHLHE40	chr3	+	4979961	4980408	4979961	4980031	4980300	4980408	418	0.00595157	0.0774855	0.263,0.416	0.0,0.0	0.34	7197	ENSG00000170325.16	PRDM10	chr11	-	129912084	129912225	129912123	129912225	129910475	129910656	0.0372675	0.328471	0.641,1.0	1.0,0.76
52301	ENSG00000100296.14	THOC5	chr22	-	29550727	29550843	29549051	29549158	29553670	29553741	265	8.60738e-05	0.00725285	0.797,1.0	0.403,0.458	0.468		6331	ENSG00000159840.16	ZYX	chr7	+	143382247	143382685	143382247	143382447	143382592	143382685	294	0.00594114	0.0774855	0.044,0.041	0.072,0.075	-0.031	4794	ENSG00000115282.21	TTC31	chr2	+	74483321	74483563	74483321	74483410	74490024	74490473	0.0373885	0.328625	0.33,0.283	0.11,0.071
62505	ENSG00000149256.16	TENM4	chr11	-	78720369	78720390	78712481	78712714	78722667	78722917	170	8.63476e-05	0.00725582	0.16,0.14	0.0,0.0	0.15		7696	ENSG00000089818.18	NECAP1	chr12	+	8090194	8092784	8090194	8091850	8092675	8092784	974	0.00594625	0.0774855	0.247,0.294	0.529,0.565	-0.276	1447	ENSG00000178761.15	FAM219B	chr15	-	74906277	74906365	74906323	74906365	74905153	74905231	0.0378002	0.331326	0.793,1.0	0.753,0.753
50777	ENSG00000123191.16	ATP7B	chr13	-	51958310	51958544	51957515	51957607	51960147	51960322	383	8.95393e-05	0.00750329	1.0,1.0	0.509,0.539	0.476		3959	ENSG00000149179.14	C11orf49	chr11	+	47161126	47162247	47161126	47161190	47161445	47162247	404	0.00603489	0.0780126	1.0,0.747	0.639,0.596	0.256	2450	ENSG00000110717.13	NDUFS8	chr11	+	68032285	68032523	68032285	68032336	68032922	68033012	0.0385006	0.336536	0.032,0.026	0.0,0.0
14934	ENSG00000175093.5	SPSB4	chr3	+	141065951	141066798	141051346	141051992	141147141	141148611	996	9.05783e-05	0.00752815	0.753,0.851	1.0,0.944	-0.17		7089	ENSG00000181038.14	METTL23	chr17	+	76732977	76733377	76732977	76733215	76733292	76733377	226	0.00603434	0.0780126	0.664,0.446	0.744,1.0	-0.317	326	ENSG00000101040.19	ZMYND8	chr20	-	47238757	47239138	47238895	47239138	47236325	47236516	0.0388568	0.33703	0.03,0.036	0.053,0.082
42642	ENSG00000239779.7	WBP1	chr2	+	74459477	74459562	74458831	74459117	74459642	74459745	234	9.05281e-05	0.00752815	1.0,1.0	0.389,0.489	0.561		7989	ENSG00000184154.15	LRTOMT	chr11	+	72094947	72096895	72094947	72095096	72095378	72096895	431	0.00604171	0.0780126	0.722,0.36	0.054,0.329	0.349	3676	ENSG00000173209.23	AHSA2P	chr2	+	61184711	61184924	61184711	61184800	61185501	61185618	0.0386889	0.33703	0.17,0.267	0.077,0.0
68603	ENSG00000140367.12	UBE2Q2	chr15	+	75859877	75859982	75854385	75854487	75868950	75869010	254	9.04253e-05	0.00752815	0.701,0.672	1.0,1.0	-0.314		5484	ENSG00000077152.11	UBE2T	chr1	-	202333009	202333335	202333009	202333093	202333236	202333335	292	0.0061088	0.0786633	0.109,0.014	0.068,0.247	-0.096	5128	ENSG00000121753.13	ADGRB2	chr1	-	31735182	31735665	31735579	31735665	31732971	31733143	0.0388759	0.33703	0.19,0.083	1.0,0.353
56233	ENSG00000154743.19	TSEN2	chr3	+	12505153	12505231	12503261	12503784	12516610	12516661	227	9.31814e-05	0.00770281	1.0,1.0	0.621,0.605	0.387		2827	ENSG00000144857.15	BOC	chr3	+	113284334	113284858	113284334	113284567	113284781	113284858	363	0.00612755	0.0786897	0.129,0.056	0.03,0.055	0.05	4820	ENSG00000197622.13	CDC42SE1	chr1	-	151056650	151056786	151056655	151056786	151055676	151055993	0.039088	0.33768	0.744,0.492	1.0,0.492
59844	ENSG00000099725.14	PRKY	chrY	+	7341114	7341234	7325905	7326169	7356134	7356223	269	9.34396e-05	0.00770281	1.0,1.0	0.714,0.564	0.361		989	ENSG00000108443.14	RPS6KB1	chr17	+	59936214	59936541	59936214	59936277	59936463	59936541	335	0.00621603	0.0796091	0.0,0.0	0.1,0.082	-0.091	5344	ENSG00000136811.16	ODF2	chr9	+	128496040	128496297	128496040	128496141	128498412	128498575	0.0391636	0.33768	0.268,0.149	0.14,0.0
69323	ENSG00000224078.15	SNHG14	chr15	+	25001357	25001713	25000244	25000374	25019026	25019148	505	9.33679e-05	0.00770281	0.889,0.835	0.655,0.668	0.201		2584	ENSG00000169045.17	HNRNPH1	chr5	-	179616868	179617110	179616868	179616958	179617050	179617110	241	0.00625211	0.0798432	0.086,0.071	0.282,0.093	-0.109	2462	ENSG00000244694.8	PTCHD4	chr6	-	48068055	48068641	48068229	48068641	48008633	48009114	0.039365	0.338496	0.698,0.48	1.0,0.675
43927	ENSG00000174963.18	ZIC4	chr3	-	147390930	147391246	147386045	147388859	147395851	147396469	465	9.42329e-05	0.00774722	0.896,0.41	1.0,1.0	-0.347		7866	ENSG00000166986.15	MARS1	chr12	+	57489266	57489558	57489266	57489345	57489423	57489558	227	0.00626819	0.0798432	0.22,0.208	0.0,0.099	0.164	1498	ENSG00000128833.13	MYO5C	chr15	-	52260861	52261127	52260901	52261127	52256638	52256720	0.039588	0.338901	0.441,1.0	0.441,1.0
62086	ENSG00000172725.14	CORO1B	chr11	-	67440701	67440836	67440334	67440439	67441124	67441244	284	9.45117e-05	0.0077492	0.0,0.0	0.259,0.13	-0.195		8030	ENSG00000150991.15	UBC	chr12	-	124911645	124913774	124911645	124912180	124913320	124913774	1289	0.00628722	0.0798697	0.717,0.677	0.609,0.623	0.081	3519	ENSG00000135018.14	UBQLN1	chr9	-	83666349	83669327	83669184	83669327	83665029	83665145	0.0396257	0.338901	0.853,0.62	0.555,0.475
2973	ENSG00000101247.18	NDUFAF5	chr20	+	13794837	13794941	13793159	13793227	13798460	13798500	253	9.52235e-05	0.00778657	1.0,1.0	0.469,0.904	0.314		4296	ENSG00000121073.15	SLC35B1	chr17	-	49705123	49706309	49705123	49705281	49705865	49706309	733	0.00645347	0.0817612	0.085,0.124	0.257,0.146	-0.097	3555	ENSG00000129071.10	MBD4	chr3	-	129436442	129437308	129436460	129437308	129434061	129434136	0.0400339	0.341472	0.412,0.413	0.239,0.237
8240	ENSG00000219200.12	RNASEK	chr17	+	7013318	7013516	7012460	7012761	7013665	7013742	347	9.58785e-05	0.00781911	0.012,0.021	0.056,0.034	-0.028		5120	ENSG00000079785.16	DDX1	chr2	+	15620207	15621116	15620207	15620396	15621064	15621116	817	0.0064899	0.0817831	0.073,0.113	0.064,0.0	0.061	1090	ENSG00000258315.5	C17orf49	chr17	+	7016494	7016685	7016494	7016525	7016909	7017014	0.0407818	0.346003	0.791,0.909	0.899,0.968
64062	ENSG00000139974.16	SLC38A6	chr14	+	61048247	61048297	61046066	61046167	61050511	61050636	199	9.65776e-05	0.00785507	0.5,0.483	0.13,0.0	0.426		5808	ENSG00000120694.20	HSPH1	chr13	-	31140183	31141259	31140183	31140309	31141121	31141259	961	0.006485	0.0817831	0.058,0.046	0.012,0.011	0.041	5235	ENSG00000021826.17	CPS1	chr2	+	210519550	210519784	210519550	210519670	210556718	210556859	0.0407833	0.346003	0.569,1.0	0.531,0.274
47438	ENSG00000066651.20	TRMT11	chr6	+	126008656	126008745	126008391	126008472	126011252	126011274	238	9.79356e-05	0.00794427	0.152,0.238	0.0,0.0	0.195		7027	ENSG00000204852.17	TCTN1	chr12	+	110641541	110642389	110641541	110641627	110642248	110642389	770	0.00651593	0.0818922	0.608,1.0	0.335,0.504	0.385	168	ENSG00000100083.19	GGA1	chr22	+	37616921	37617048	37616921	37616997	37618447	37618546	0.0412492	0.348095	0.13,0.0	0.199,0.176
40598	ENSG00000168958.20	MFF	chr2	+	227347225	227347384	227342744	227342819	227352513	227352573	308	9.91881e-05	0.00802447	1.0,1.0	0.744,0.563	0.347		5782	ENSG00000118515.12	SGK1	chr6	-	134173273	134173566	134173273	134173357	134173461	134173566	253	0.00656578	0.0822992	1.0,0.541	0.495,0.371	0.337	3562	ENSG00000113240.13	CLK4	chr5	-	178617343	178618778	178618555	178618778	178616881	178616948	0.0411962	0.348095	0.561,1.0	1.0,1.0
60809	ENSG00000269893.8	SNHG8	chr4	+	118278943	118279137	118278754	118278792	118279388	118279431	343	9.99603e-05	0.00806549	0.743,0.738	1.0,1.0	-0.26		1193	ENSG00000100429.18	HDAC10	chr22	-	50245674	50246092	50245674	50245827	50245909	50246092	231	0.00662354	0.0827913	0.223,0.326	0.0,0.097	0.226	979	ENSG00000168259.17	DNAJC7	chr17	-	42016586	42017151	42017039	42017151	42000481	42000570	0.0414544	0.348899	0.808,0.634	1.0,1.0
6317	ENSG00000267128.2	RNF157-AS1	chr17	+	76147293	76147599	76138431	76138520	76153132	76153788	455	0.000100593	0.00809506	0.396,1.0	0.0,0.0	0.698		3750	ENSG00000030066.13	NUP160	chr11	-	47812063	47812429	47812063	47812224	47812301	47812429	226	0.0066571	0.0827913	0.047,0.086	0.027,0.0	0.053	4997	ENSG00000163161.14	ERCC3	chr2	-	127291911	127292846	127292609	127292846	127290223	127290273	0.0422325	0.354507	0.19,0.129	0.247,0.302
9540	ENSG00000101294.18	HM13	chr20	+	31549028	31549114	31547447	31547692	31550063	31550121	235	0.00010141	0.00813931	0.137,0.487	0.792,1.0	-0.584		5950	ENSG00000040487.13	SLC66A1	chr1	+	19312325	19312889	19312325	19312358	19312728	19312889	519	0.00665774	0.0827913	1.0,0.483	1.0,1.0	-0.258	5940	ENSG00000115129.14	TP53I3	chr2	-	24082884	24083152	24083000	24083152	24080818	24081031	0.0424843	0.35568	1.0,1.0	1.0,0.839
14528	ENSG00000005882.12	PDK2	chr17	+	50108318	50108417	50108000	50108232	50108611	50108719	248	0.000102885	0.00821433	0.88,0.94	1.0,1.0	-0.09		2154	ENSG00000255717.7	SNHG1	chr11	-	62854518	62855216	62854518	62854938	62855132	62855216	343	0.00670381	0.0831449	0.04,0.102	0.098,0.233	-0.095	1508	ENSG00000171763.20	SPATA5L1	chr15	+	45415586	45415809	45415586	45415779	45417268	45417399	0.0426904	0.356465	0.122,0.085	0.294,0.208
51801	ENSG00000110074.11	FOXRED1	chr11	+	126271219	126271657	126269200	126269291	126272968	126273079	587	0.000102849	0.00821433	1.0,1.0	0.864,0.364	0.386		4665	ENSG00000157216.16	SSBP3	chr1	-	54242163	54243299	54242163	54242212	54243234	54243299	1171	0.00672853	0.0832325	0.027,0.017	0.044,0.028	-0.014	2035	ENSG00000100532.13	CGRRF1	chr14	+	54530048	54530763	54530048	54530405	54530902	54531050	0.0429836	0.357225	1.0,0.638	0.37,1.0
53000	ENSG00000197959.14	DNM3	chr1	+	172323328	172323340	172308727	172308839	172379017	172379182	161	0.000104698	0.00833718	0.822,0.649	0.0,0.236	0.618		874	ENSG00000169718.18	DUS1L	chr17	-	82058340	82058818	82058340	82058408	82058780	82058818	521	0.00679142	0.0837905	0.632,0.588	1.0,0.759	-0.269	3748	ENSG00000110429.14	FBXO3	chr11	-	33753110	33754500	33754454	33754500	33751522	33751607	0.0430066	0.357225	0.049,0.051	0.029,0.026
44586	ENSG00000184611.12	KCNH7	chr2	-	162512653	162512674	162504442	162504657	162517729	162518158	170	0.000106473	0.00842978	0.397,0.127	0.0,0.0	0.262		1652	ENSG00000140400.17	MAN2C1	chr15	-	75356605	75356902	75356605	75356685	75356792	75356902	256	0.00689197	0.084809	0.496,0.657	0.875,0.712	-0.217	1131	ENSG00000131165.16	CHMP1A	chr16	-	89647034	89647331	89647202	89647331	89646526	89646714	0.0437524	0.361965	0.414,0.168	0.135,0.063
57665	ENSG00000107263.19	RAPGEF1	chr9	-	131604930	131605188	131602113	131602149	131619050	131619206	407	0.000106692	0.00842978	0.268,0.687	1.0,1.0	-0.522		6072	ENSG00000223705.9	NSUN5P1	chr7	+	75415591	75416191	75415591	75415778	75415980	75416191	351	0.00696813	0.0855229	0.798,0.55	0.847,1.0	-0.249	2683	ENSG00000144749.14	LRIG1	chr3	-	66383990	66384272	66384131	66384272	66382981	66383401	0.0438054	0.361965	0.93,1.0	0.864,0.954
65626	ENSG00000120800.5	UTP20	chr12	+	101285748	101285881	101285569	101285636	101286320	101286509	282	0.000106368	0.00842978	1.0,1.0	0.514,0.569	0.459		3573	ENSG00000155366.17	RHOC	chr1	-	112702562	112703119	112702562	112702693	112702998	112703119	454	0.00702085	0.0857234	0.033,0.046	0.095,0.127	-0.072	314	ENSG00000215440.12	NPEPL1	chr20	+	58691723	58691830	58691723	58691780	58693736	58693922	0.0439403	0.362136	0.086,1.0	0.2,0.0
58795	ENSG00000072134.15	EPN2	chr17	+	19313125	19313279	19312051	19312144	19328710	19328887	303	0.000108767	0.00857144	0.747,0.869	1.0,1.0	-0.192		7517	ENSG00000175634.15	RPS6KB2	chr11	+	67433125	67433447	67433125	67433216	67433339	67433447	272	0.00701488	0.0857234	0.0,0.027	0.099,0.084	-0.078	3226	ENSG00000244754.9	N4BP2L2	chr13	-	32538617	32538825	32538777	32538825	32535768	32537027	0.0447133	0.367553	1.0,1.0	1.0,0.529
37472	ENSG00000168781.22	PPIP5K1	chr15	-	43564102	43564165	43558794	43558932	43564866	43564992	212	0.000110826	0.00871117	1.0,0.297	0.0,0.072	0.612		2437	ENSG00000184575.12	XPOT	chr12	+	64425037	64425457	64425037	64425138	64425337	64425457	348	0.0070493	0.0858485	0.853,0.763	1.0,1.0	-0.192	6890	ENSG00000151575.14	TEX9	chr15	+	56365446	56365893	56365446	56365670	56373440	56373504	0.0449034	0.368162	0.256,0.584	0.667,0.706
34339	ENSG00000156467.10	UQCRB	chr8	-	96231378	96231515	96230941	96231132	96231773	96231940	286	0.000111707	0.0087432	0.154,0.1	0.0,0.047	0.104		788	ENSG00000133275.16	CSNK1G2	chr19	+	1978304	1978511	1978304	1978345	1978441	1978511	245	0.00714075	0.0860994	0.0,0.0	0.132,0.059	-0.096	5001	ENSG00000113721.14	PDGFRB	chr5	-	150134715	150135016	150134749	150135016	150133880	150134008	0.0452767	0.370265	0.068,0.028	0.0,0.043
48833	ENSG00000005801.18	ZNF195	chr11	-	3360719	3360788	3357926	3360565	3362545	3362831	218	0.000111809	0.0087432	0.255,0.0	0.578,1.0	-0.661		3633	ENSG00000134222.16	PSRC1	chr1	-	109282517	109282731	109282517	109282575	109282679	109282731	253	0.00714298	0.0860994	0.069,0.0	0.227,0.022	-0.09	1713	ENSG00000145979.18	TBC1D7	chr6	-	13328295	13328531	13328455	13328531	13326786	13326963	0.0457571	0.371323	1.0,1.0	0.828,0.591
12848	ENSG00000139428.12	MMAB	chr12	-	109571648	109571710	109567817	109568863	109573346	109573480	211	0.000112482	0.00877333	1.0,1.0	0.879,0.846	0.137		5879	ENSG00000105698.16	USF2	chr19	+	35278697	35279074	35278697	35278792	35278969	35279074	326	0.00709704	0.0860994	1.0,1.0	0.632,1.0	0.184	2437	ENSG00000125107.19	CNOT1	chr16	-	58536967	58537220	58536988	58537220	58534146	58534395	0.0456713	0.371323	0.108,0.107	0.09,0.026
68525	ENSG00000072110.16	ACTN1	chr14	-	68878988	68879069	68877081	68878523	68879961	68880108	230	0.00011296	0.00878802	0.874,0.92	0.964,1.0	-0.085		6232	ENSG00000135945.10	REV1	chr2	-	99402243	99402800	99402243	99402346	99402643	99402800	446	0.00714193	0.0860994	0.433,0.846	1.0,0.834	-0.278	5453	ENSG00000189180.16	ZNF33A	chr10	+	38016870	38017020	38016870	38017015	38017290	38017386	0.0456612	0.371323	0.057,0.162	0.0,0.088
20884	ENSG00000065485.20	PDIA5	chr3	+	123130479	123130616	123124271	123124343	123145521	123145592	286	0.000114339	0.00887267	1.0,1.0	0.899,0.696	0.203		4017	ENSG00000162909.18	CAPN2	chr1	+	223769840	223770525	223769840	223769909	223770446	223770525	686	0.00732318	0.0880463	0.441,0.282	0.262,0.135	0.163	2503	ENSG00000163660.12	CCNL1	chr3	-	157149679	157149977	157149835	157149977	157149484	157149596	0.0466094	0.376085	0.0,0.103	0.065,0.196
60808	ENSG00000269893.8	SNHG8	chr4	+	118278933	118279137	118278754	118278792	118279388	118279431	353	0.000115145	0.00891244	0.747,0.747	1.0,1.0	-0.253		3674	ENSG00000196295.12	GARS1-DT	chr7	-	30576563	30578091	30576563	30576710	30577648	30578091	1087	0.00742103	0.0889957	0.439,0.305	0.607,0.855	-0.359	2701	ENSG00000226419.8	SLC16A1-AS1	chr1	+	112956414	112957722	112956414	112956956	112960476	112960575	0.0466995	0.376085	0.432,1.0	0.746,1.0
50350	ENSG00000087266.17	SH3BP2	chr4	+	2823394	2823569	2822934	2823037	2824612	2824730	324	0.000115836	0.00894319	0.155,0.111	0.0,0.0	0.133		7258	ENSG00000256269.10	HMBS	chr11	+	119089682	119090067	119089682	119089760	119089989	119090067	378	0.0074428	0.0890303	0.108,0.165	0.0,0.067	0.103	6858	ENSG00000197601.13	FAR1	chr11	+	13711927	13712055	13711927	13712046	13712965	13713033	0.0466853	0.376085	0.069,0.034	0.033,0.0
45598	ENSG00000013441.16	CLK1	chr2	-	200860124	200860215	200859679	200859746	200861237	200861466	240	0.000116564	0.00897663	0.0,0.0	0.651,0.293	-0.472		1263	ENSG00000141456.16	PELP1	chr17	-	4675273	4675884	4675273	4675362	4675796	4675884	583	0.00749125	0.0893829	0.016,0.032	0.033,0.091	-0.038	2893	ENSG00000115234.11	SNX17	chr2	+	27371268	27371468	27371268	27371343	27372622	27373129	0.0471006	0.377399	0.076,0.196	0.569,0.179
15764	ENSG00000132676.16	DAP3	chr1	+	155737005	155737063	155731943	155732033	155738156	155738529	207	0.000118537	0.00908259	0.664,0.866	1.0,1.0	-0.235		8292	ENSG00000185246.18	PRPF39	chr14	+	45096423	45096758	45096423	45096492	45096595	45096758	252	0.00760477	0.0905083	0.825,0.631	0.912,0.92	-0.188	4202	ENSG00000136051.15	WASHC4	chr12	+	105133769	105133899	105133769	105133896	105137885	105138011	0.0470609	0.377399	0.0,0.05	0.089,0.105
57915	ENSG00000263072.8	ZNF213-AS1	chr16	-	3132849	3133194	3131746	3132103	3134629	3134863	494	0.000118378	0.00908259	0.079,0.43	1.0,0.731	-0.611		2372	ENSG00000070061.16	ELP1	chr9	-	108930996	108934124	108930996	108931201	108933863	108934124	2811	0.00769346	0.0908754	0.395,1.0	1.0,0.809	-0.207	1692	ENSG00000064666.15	CNN2	chr19	+	1032558	1032669	1032558	1032663	1036129	1036246	0.0476773	0.380101	0.743,0.0	0.0,0.0
12137	ENSG00000118690.13	ARMC2	chr6	+	108936899	108936999	108928087	108928233	108953032	108953351	249	0.000122255	0.0093439	1.0,1.0	0.0,0.545	0.728		4825	ENSG00000049656.14	CLPTM1L	chr5	-	1324762	1325816	1324762	1324813	1325750	1325816	1086	0.00768111	0.0908754	0.084,0.058	0.141,0.136	-0.068	1917	ENSG00000206149.10	HERC2P9	chr15	+	28655272	28655691	28655272	28655420	28655795	28656026	0.0476591	0.380101	1.0,0.771	1.0,1.0
50245	ENSG00000078967.13	UBE2D4	chr7	+	43942953	43943031	43938430	43938494	43948631	43948737	227	0.000122879	0.00936803	0.349,0.368	1.0,0.766	-0.524		5368	ENSG00000042429.12	MED17	chr11	+	93794907	93796540	93794907	93795060	93796409	93796540	1498	0.0076847	0.0908754	0.023,0.029	0.048,0.063	-0.029	1001	ENSG00000276234.5	TADA2A	chr17	+	37437737	37437922	37437737	37437829	37440504	37440662	0.0483808	0.38114	0.066,0.0	0.291,0.058
51999	ENSG00000133612.19	AGAP3	chr7	+	151120519	151120745	151119986	151120145	151122724	151122878	375	0.000124986	0.00950491	0.049,0.04	0.224,0.312	-0.224		805	ENSG00000099622.14	CIRBP	chr19	+	1270927	1271467	1270927	1271036	1271139	1271467	252	0.00772003	0.0909612	0.11,0.179	0.062,0.019	0.104	2013	ENSG00000135506.16	OS9	chr12	+	57718145	57718421	57718145	57718376	57718992	57719182	0.0482407	0.38114	0.952,0.925	0.843,0.828
43914	ENSG00000105278.12	ZFR2	chr19	-	3855401	3855559	3834772	3834983	3868964	3869015	307	0.000127679	0.00968549	0.226,0.421	0.0,0.0	0.324		8307	ENSG00000072121.17	ZFYVE26	chr14	-	67761365	67762412	67761365	67761584	67762202	67762412	767	0.00774406	0.0910169	1.0,0.731	0.716,0.368	0.323	2310	ENSG00000169045.17	HNRNPH1	chr5	-	179623594	179623669	179623635	179623669	179623036	179623164	0.0485686	0.38114	0.485,0.44	0.263,0.343
42885	ENSG00000249715.13	FER1L5	chr2	+	96647063	96647155	96646400	96646453	96647777	96647886	241	0.000128574	0.00972912	0.848,1.0	0.481,0.292	0.537		2456	ENSG00000072310.18	SREBF1	chr17	-	17817547	17817916	17817547	17817591	17817695	17817916	253	0.007784	0.0910322	0.541,1.0	1.0,1.0	-0.23	2880	ENSG00000134058.12	CDK7	chr5	+	69254601	69254669	69254601	69254667	69255459	69255528	0.049129	0.38114	1.0,0.86	1.0,1.0
51802	ENSG00000110074.11	FOXRED1	chr11	+	126271436	126271657	126269153	126269291	126272968	126273079	370	0.000129406	0.00976774	1.0,1.0	0.858,0.377	0.383		7764	ENSG00000061273.18	HDAC7	chr12	-	47789812	47791308	47789812	47789920	47791258	47791308	1487	0.00776535	0.0910322	0.157,0.128	0.037,0.129	0.06	3929	ENSG00000171824.14	EXOSC10	chr1	-	11077329	11077443	11077364	11077443	11076841	11076948	0.0483923	0.38114	0.288,0.0	0.447,0.447
29209	ENSG00000079805.19	DNM2	chr19	+	10797379	10797518	10796060	10796199	10798485	10798572	288	0.000132141	0.00994947	0.742,0.7	1.0,0.901	-0.23		181	ENSG00000100412.17	ACO2	chr22	+	41527287	41528022	41527287	41527420	41527900	41528022	629	0.00784992	0.0914757	0.121,0.11	0.183,0.195	-0.074	4050	ENSG00000144535.20	DIS3L2	chr2	+	232130618	232130943	232130618	232130719	232163458	232163632	0.0485649	0.38114	0.348,1.0	0.737,1.0
11856	ENSG00000131725.14	WDR44	chrX	+	118378418	118378452	118346072	118346580	118387339	118387414	183	0.000135417	0.010146	0.588,0.765	1.0,1.0	-0.324		907	ENSG00000214087.9	ARL16	chr17	-	81682033	81682675	81682033	81682149	81682490	81682675	490	0.00786074	0.0914757	0.753,0.82	0.323,0.527	0.361	5919	ENSG00000197150.13	ABCB8	chr7	+	151040497	151040644	151040497	151040634	151040827	151040922	0.0489529	0.38114	0.0,0.319	0.567,0.238
28899	ENSG00000049323.16	LTBP1	chr2	+	33134792	33134960	33110581	33110751	33186855	33187080	317	0.000135124	0.010146	0.909,0.962	0.801,0.791	0.139		4388	ENSG00000164062.13	APEH	chr3	+	49676055	49676515	49676055	49676219	49676377	49676515	307	0.00794862	0.0922706	0.053,0.048	0.122,0.17	-0.096	6324	ENSG00000197912.16	SPG7	chr16	+	89528631	89529579	89528631	89529524	89530682	89530808	0.0489941	0.38114	0.96,1.0	0.898,0.927
5757	ENSG00000154889.17	MPPE1	chr18	-	11905737	11905953	11896983	11897356	11906202	11906309	365	0.000135979	0.010163	0.62,0.17	0.0,0.0	0.395		781	ENSG00000104969.11	SGTA	chr19	-	2757692	2759294	2757692	2757782	2759256	2759294	1623	0.00798588	0.0924754	0.125,0.082	0.23,0.165	-0.094	6889	ENSG00000133895.18	MEN1	chr11	-	64810513	64810551	64810525	64810551	64809664	64810132	0.0490619	0.38114	1.0,0.382	1.0,1.0
50807	ENSG00000111206.13	FOXM1	chr12	-	2865354	2865399	2864682	2864755	2866392	2866521	194	0.00013682	0.0102008	0.822,0.729	0.204,0.277	0.535		224	ENSG00000235954.7	TTC28-AS1	chr22	+	27997410	27998838	27997410	27998152	27998603	27998838	600	0.00803561	0.0928231	0.554,1.0	1.0,1.0	-0.223	7107	ENSG00000087053.20	MTMR2	chr11	-	95865439	95865676	95865600	95865676	95862271	95862366	0.0487974	0.38114	0.047,0.039	0.09,0.116
16208	ENSG00000181027.11	FKRP	chr19	+	46748774	46748884	46748026	46748088	46755411	46755634	259	0.000141099	0.0104941	0.801,1.0	0.161,0.535	0.552		5457	ENSG00000135454.14	B4GALNT1	chr12	-	57627617	57628262	57627617	57627891	57628121	57628262	379	0.0080609	0.0928876	0.541,1.0	1.0,0.0	0.27	7745	ENSG00000092108.22	SCFD1	chr14	+	30700187	30702375	30700187	30700258	30705822	30705885	0.0490251	0.38114	0.688,0.8	1.0,1.0
9858	ENSG00000072864.16	NDE1	chr16	+	15699728	15699854	15694164	15694256	15724190	15724222	275	0.000154762	0.0114822	0.419,0.351	0.0,0.0	0.385		6647	ENSG00000008513.16	ST3GAL1	chr8	-	133475718	133476600	133475718	133476074	133476277	133476600	352	0.00818899	0.0940882	0.458,0.629	1.0,1.0	-0.457	4493	ENSG00000075702.19	WDR62	chr19	+	36083062	36083241	36083062	36083188	36084652	36084744	0.0497418	0.384178	0.33,1.0	1.0,1.0
56469	ENSG00000259736.1	CRTC3-AS1	chr15	-	90714920	90715042	90712992	90713299	90716980	90717141	271	0.000155259	0.0114911	1.0,1.0	0.355,0.216	0.715		7307	ENSG00000110321.19	EIF4G2	chr11	-	10799551	10800348	10799551	10799756	10800089	10800348	482	0.00820898	0.0940882	0.02,0.022	0.034,0.029	-0.011	4587	ENSG00000142920.17	AZIN2	chr1	+	33082177	33083142	33082177	33082354	33083953	33084127	0.0498838	0.384178	1.0,1.0	0.831,0.799
21095	ENSG00000163607.17	GTPBP8	chr3	+	112995136	112995265	112993074	112993124	112996891	112996991	278	0.000155725	0.0114976	1.0,0.843	0.663,0.263	0.458		7520	ENSG00000110697.13	PITPNM1	chr11	-	67493687	67494070	67493687	67493837	67493921	67494070	233	0.00822498	0.0940882	0.084,0.093	0.232,0.254	-0.154	6208	ENSG00000169398.19	PTK2	chr8	-	140925561	140925749	140925660	140925749	140890542	140890769	0.049786	0.384178	0.0,0.103	0.107,0.334
28200	ENSG00000068885.15	IFT80	chr3	-	160366092	160366152	160357488	160357578	160375811	160375880	209	0.000156579	0.0115326	0.681,0.192	1.0,1.0	-0.564		3380	ENSG00000154222.15	CC2D1B	chr1	-	52357780	52358461	52357780	52357916	52358330	52358461	563	0.00832705	0.0950251	0.726,0.726	1.0,0.809	-0.179	7111	ENSG00000104872.11	PIH1D1	chr19	-	49449339	49449654	49449474	49449654	49448000	49448062	0.0506595	0.389208	0.189,0.0	0.055,0.0
10529	ENSG00000140557.12	ST8SIA2	chr15	+	92430048	92430111	92393880	92394162	92434246	92434375	212	0.000158038	0.0115816	1.0,1.0	0.637,0.652	0.355		4431	ENSG00000112139.17	MDGA1	chr6	-	37654799	37655896	37654799	37654932	37655699	37655896	916	0.008396	0.0955806	0.14,0.084	0.321,0.178	-0.137	182	ENSG00000046647.14	GEMIN8	chrX	-	14026051	14026221	14026139	14026221	14021463	14021511	0.0510689	0.391405	0.136,0.095	0.112,0.0
29580	ENSG00000168803.16	ADAL	chr15	+	43347015	43347096	43345853	43345980	43348906	43349045	230	0.000157787	0.0115816	0.493,0.493	1.0,1.0	-0.507		1781	ENSG00000115257.15	PCSK4	chr19	-	1486852	1487313	1486852	1487065	1487140	1487313	224	0.00851857	0.0967423	0.538,0.16	1.0,0.666	-0.484	4696	ENSG00000143933.19	CALM2	chr2	-	47176235	47176511	47176440	47176511	47170733	47170764	0.0511941	0.391419	0.095,0.057	0.094,0.153
55349	ENSG00000153707.18	PTPRD	chr9	-	8497241	8497268	8492861	8492979	8499646	8499840	176	0.000158386	0.0115816	0.435,0.311	0.068,0.25	0.214		7464	ENSG00000162300.13	ZFPL1	chr11	+	65085114	65086608	65085114	65085226	65086414	65086608	1337	0.00867342	0.098264	0.041,0.021	0.045,0.071	-0.027	3140	ENSG00000173171.15	MTX1	chr1	+	155210547	155212219	155210547	155210627	155212384	155212567	0.0514618	0.392244	0.788,1.0	0.864,0.637
12006	ENSG00000115257.15	PCSK4	chr19	-	1487602	1487691	1487140	1487313	1487784	1487861	238	0.000159839	0.0116598	1.0,0.556	0.0,0.0	0.778		51	ENSG00000166707.12	ZCCHC18	chrX	+	104113433	104115842	104113433	104113573	104115251	104115842	1827	0.00875214	0.0989181	0.542,0.62	0.581,1.0	-0.21	4071	ENSG00000114735.10	HEMK1	chr3	+	50570930	50571332	50570930	50571294	50571709	50571801	0.0516625	0.392244	0.57,0.443	0.0,1.0
43769	ENSG00000173166.18	RAPH1	chr2	-	203470238	203470313	203461847	203461925	203477075	203477156	224	0.000160518	0.0116814	1.0,1.0	0.689,0.78	0.266		2243	ENSG00000084774.14	CAD	chr2	+	27233311	27233808	27233311	27233536	27233625	27233808	238	0.00892043	0.100579	0.032,0.043	0.224,0.094	-0.121	4765	ENSG00000196233.14	LCOR	chr10	+	96832263	96832399	96832263	96832395	96833405	96833479	0.0516729	0.392244	1.0,0.83	0.864,0.796
24765	ENSG00000152061.24	RABGAP1L	chr1	+	174988640	174988838	174982833	174982905	174989848	174990341	347	0.000162071	0.0117662	1.0,1.0	0.659,0.612	0.365		79	ENSG00000147140.17	NONO	chrX	+	71297376	71297938	71297376	71297461	71297835	71297938	523	0.00903605	0.100917	0.654,0.637	0.402,0.428	0.23	5812	ENSG00000105835.13	NAMPT	chr7	-	106254116	106254504	106254363	106254504	106253016	106253151	0.0522101	0.395376	0.023,0.118	0.045,0.0
2793	ENSG00000198646.14	NCOA6	chr20	-	34809452	34809522	34792449	34792563	34825471	34825651	219	0.000162569	0.0117743	0.0,0.0	0.671,0.254	-0.463		1197	ENSG00000105483.18	CARD8	chr19	-	48232452	48234543	48232452	48232493	48234402	48234543	2058	0.00897225	0.100917	0.837,1.0	0.733,0.767	0.168	3129	ENSG00000163374.20	YY1AP1	chr1	-	155680381	155680456	155680415	155680456	155679408	155679512	0.0526449	0.39772	0.14,0.055	0.0,0.0
9749	ENSG00000102897.10	LYRM1	chr16	+	20915555	20915714	20900770	20900889	20920121	20920214	308	0.000163889	0.0118416	1.0,1.0	0.617,0.727	0.328		1310	ENSG00000104731.14	KLHDC4	chr16	-	87755193	87756477	87755193	87755292	87756421	87756477	1278	0.0090004	0.100917	0.336,0.437	0.794,0.665	-0.343	5777	ENSG00000126746.18	ZNF384	chr12	-	6689097	6689510	6689367	6689510	6688166	6688226	0.0530154	0.399567	0.416,1.0	1.0,0.516
59078	ENSG00000025434.19	NR1H3	chr11	+	47260550	47260675	47259790	47259979	47261240	47261280	274	0.000170077	0.0122596	0.521,0.521	1.0,1.0	-0.479		2762	ENSG00000175054.16	ATR	chr3	-	142466323	142469569	142466323	142466533	142467933	142469569	1549	0.00902121	0.100917	0.294,0.105	0.038,0.06	0.15	5658	ENSG00000055609.21	KMT2C	chr7	-	152194397	152194568	152194439	152194568	152194228	152194261	0.0534572	0.40164	0.053,0.19	0.0,0.061
37047	ENSG00000197343.11	ZNF655	chr7	+	99561887	99562494	99560532	99560695	99563862	99564705	756	0.000170724	0.0122772	0.602,0.789	1.0,1.0	-0.304		2856	ENSG00000184014.9	DENND5A	chr11	-	9141939	9144278	9141939	9142108	9144096	9144278	2137	0.00915404	0.101768	0.812,0.832	0.468,0.531	0.323	7742	ENSG00000092108.22	SCFD1	chr14	+	30622319	30622462	30622319	30622399	30628208	30628279	0.0535436	0.40164	0.167,0.113	0.637,0.26
62561	ENSG00000073921.18	PICALM	chr11	-	85978069	85978093	85976622	85976682	85981128	85981228	173	0.000172096	0.0123467	0.203,0.287	0.107,0.129	0.127		4046	ENSG00000064961.19	HMG20B	chr19	+	3572978	3573347	3572978	3572994	3573291	3573347	446	0.00915545	0.101768	0.667,0.455	1.0,1.0	-0.439	2568	ENSG00000066279.19	ASPM	chr1	-	197091906	197092056	197091930	197092056	197090849	197091041	0.053875	0.402053	0.89,1.0	0.962,1.0
8015	ENSG00000175106.17	TVP23C	chr17	-	15553764	15553829	15547058	15547148	15555281	15555364	214	0.000177732	0.012721	0.41,0.807	1.0,1.0	-0.391		2896	ENSG00000108654.16	DDX5	chr17	-	64500548	64502069	64500548	64501143	64502009	64502069	1015	0.00925537	0.102156	0.864,0.906	0.938,1.0	-0.084	4678	ENSG00000066468.24	FGFR2	chr10	-	121515116	121515319	121515122	121515319	121503789	121503941	0.0540408	0.402053	0.769,0.835	0.51,0.763
14585	ENSG00000138829.12	FBN2	chr5	-	128312633	128312795	128311884	128311953	128318148	128318271	311	0.00017843	0.012741	0.889,0.831	1.0,1.0	-0.14		3523	ENSG00000273136.7	NBPF26	chr1	+	120805417	120805765	120805417	120805458	120805555	120805765	246	0.00924837	0.102156	0.06,0.123	0.357,0.178	-0.176	6544	ENSG00000204852.17	TCTN1	chr12	+	110614125	110614463	110614125	110614402	110619835	110619956	0.0539581	0.402053	0.191,0.0	0.027,0.027
37960	ENSG00000223745.8	CCDC18-AS1	chr1	-	93311489	93311608	93305387	93305470	93324634	93324729	268	0.000179774	0.0128069	0.582,0.357	1.0,1.0	-0.53		7462	ENSG00000162300.13	ZFPL1	chr11	+	65084241	65084800	65084241	65084360	65084690	65084800	479	0.00922106	0.102156	1.0,1.0	0.651,0.483	0.433	6906	ENSG00000162961.14	DPY30	chr2	-	32039592	32039805	32039732	32039805	32039420	32039492	0.0541054	0.402053	0.0,0.508	1.0,0.392
10785	ENSG00000173681.16	BCLAF3	chrX	-	19955390	19955566	19953777	19953892	19965043	19965142	325	0.000180657	0.0128397	0.762,0.856	0.391,0.084	0.571		8071	ENSG00000120314.19	WDR55	chr5	+	140668233	140668502	140668233	140668334	140668414	140668502	229	0.00928446	0.102237	0.234,0.056	0.394,0.465	-0.284	6806	ENSG00000177595.19	PIDD1	chr11	-	801001	801120	801017	801120	800761	800912	0.0543495	0.402922	0.783,0.644	1.0,1.0
6049	ENSG00000141552.18	ANAPC11	chr17	+	81893551	81893614	81891740	81891863	81894466	81894586	212	0.000186223	0.0132045	0.918,1.0	0.714,0.857	0.174		314	ENSG00000026036.22	RTEL1-TNFRSF6B	chr20	+	63688527	63689132	63688527	63688605	63689054	63689132	598	0.00938935	0.103046	0.179,0.047	0.359,0.199	-0.166	4928	ENSG00000163703.20	CRELD1	chr3	+	9943076	9943253	9943076	9943172	9943380	9943515	0.0545089	0.403163	0.302,0.245	0.206,0.0
47890	ENSG00000115464.15	USP34	chr2	-	61204255	61204380	61192900	61192980	61204496	61204601	274	0.000187305	0.0132503	0.96,0.944	0.809,0.662	0.216		1435	ENSG00000169592.15	INO80E	chr16	+	29996243	29996617	29996243	29996391	29996546	29996617	304	0.00942347	0.103046	0.0,0.29	0.0,0.089	0.1	1454	ENSG00000166233.15	ARIH1	chr15	+	72580730	72580991	72580730	72580877	72582074	72582187	0.0569845	0.416629	0.976,1.0	0.914,1.0
56456	ENSG00000197555.10	SIPA1L1	chr14	+	71704720	71704783	71702380	71702505	71705221	71705340	212	0.000187857	0.0132585	0.123,0.245	0.0,0.0	0.184		6333	ENSG00000214331.8	PDPR2P	chr16	-	74352039	74352378	74352039	74352203	74352296	74352378	242	0.00940281	0.103046	0.017,0.024	0.061,0.123	-0.071	2075	ENSG00000127463.15	EMC1	chr1	-	19244738	19245030	19244905	19245030	19243949	19244015	0.056541	0.416629	0.092,0.239	0.347,0.268
65549	ENSG00000001631.16	KRIT1	chr7	-	92245426	92245595	92244901	92245171	92245905	92246100	318	0.00019068	0.0134266	0.0,0.319	0.484,1.0	-0.583		4739	ENSG00000187514.17	PTMA	chr2	+	231711347	231711983	231711347	231711419	231711889	231711983	619	0.00957273	0.104436	0.107,0.138	0.393,0.185	-0.167	3240	ENSG00000154556.18	SORBS2	chr4	-	185733997	185734154	185734098	185734154	185678795	185678822	0.0567087	0.416629	1.0,0.544	1.0,1.0
17196	ENSG00000204394.13	VARS1	chr6	-	31784213	31784308	31783095	31783186	31784393	31784435	244	0.000193068	0.0135634	1.0,1.0	0.917,0.859	0.112		3175	ENSG00000137563.13	GGH	chr8	-	63026157	63030217	63026157	63026296	63027180	63030217	1033	0.00960765	0.104575	0.165,0.217	0.14,0.058	0.092	5663	ENSG00000100722.20	ZC3H14	chr14	+	88602827	88603060	88602827	88603045	88607242	88607363	0.0569861	0.416629	0.922,0.879	0.809,0.679
34959	ENSG00000137504.15	CREBZF	chr11	-	85663178	85663293	85662388	85662457	85663523	85663601	264	0.000196411	0.0137665	0.027,0.204	0.458,0.361	-0.294		4197	ENSG00000071894.17	CPSF1	chr8	-	144400165	144400493	144400165	144400276	144400353	144400493	226	0.00968078	0.105128	0.086,0.109	0.051,0.0	0.072	7392	ENSG00000135502.19	SLC26A10	chr12	+	57625235	57625330	57625235	57625318	57625409	57625464	0.0569325	0.416629	1.0,0.735	0.481,0.764
24830	ENSG00000143258.16	USP21	chr1	+	161160328	161160506	161159520	161159678	161160619	161160992	327	0.000198698	0.0138311	0.578,0.0	1.0,1.0	-0.711		355	ENSG00000124155.18	PIGT	chr20	+	45416516	45418979	45416516	45416694	45418851	45418979	2306	0.00974043	0.105529	0.026,0.024	0.056,0.05	-0.028	474	ENSG00000010361.14	FUZ	chr19	-	49812614	49812736	49812637	49812736	49812250	49812335	0.0574495	0.41809	0.796,0.722	1.0,0.776
42441	ENSG00000117859.19	OSBPL9	chr1	+	51752502	51752725	51750144	51750195	51756319	51756657	372	0.000198187	0.0138311	0.159,0.184	0.036,0.022	0.142		5690	ENSG00000119977.22	TCTN3	chr10	-	95683100	95683629	95683100	95683180	95683521	95683629	490	0.0097983	0.105529	0.354,1.0	1.0,0.603	-0.124	7790	ENSG00000100650.16	SRSF5	chr14	+	69767092	69767380	69767092	69767255	69768137	69768282	0.0573671	0.41809	0.224,0.153	0.352,0.301
60695	ENSG00000232104.3	RFX3-AS1	chr9	+	3671473	3671645	3668164	3668408	3674410	3674648	321	0.00019864	0.0138311	1.0,1.0	0.0,1.0	0.5		6134	ENSG00000127914.19	AKAP9	chr7	+	92098108	92099869	92098108	92098214	92099686	92099869	1621	0.00980725	0.105529	0.237,0.21	0.507,0.36	-0.21	6151	ENSG00000108465.15	CDK5RAP3	chr17	+	47973518	47973693	47973518	47973650	47973930	47974031	0.0577098	0.419023	0.141,0.07	0.19,0.181
4738	ENSG00000129351.17	ILF3	chr19	+	10678612	10678704	10677162	10677310	10679096	10679170	241	0.00020601	0.0143048	0.973,0.975	0.915,0.931	0.051		7087	ENSG00000130734.10	ATG4D	chr19	+	10546838	10547253	10546838	10547115	10547188	10547253	222	0.00977688	0.105529	0.0,0.251	0.223,0.299	-0.136	835	ENSG00000092931.11	MFSD11	chr17	+	76754046	76754204	76754046	76754087	76767385	76767451	0.0582358	0.41996	0.0,0.359	0.219,1.0
49378	ENSG00000010270.14	STARD3NL	chr7	+	38217024	38217078	38215027	38215105	38217187	38217269	203	0.000206443	0.0143048	0.918,0.929	1.0,1.0	-0.077		1035	ENSG00000181513.15	ACBD4	chr17	+	45135686	45136232	45135686	45135953	45136107	45136232	303	0.00987502	0.106016	0.287,0.0	0.33,0.0	-0.022	2204	ENSG00000138674.17	SEC31A	chr4	-	82900333	82900569	82900371	82900569	82900076	82900223	0.0580518	0.41996	0.614,0.871	1.0,0.814
32943	ENSG00000250337.7	PURPL	chr5	+	27476086	27476158	27475534	27475695	27477638	27477801	221	0.00020938	0.0144753	1.0,0.403	0.0,0.0	0.702		1801	ENSG00000196547.15	MAN2A2	chr15	+	90918193	90918755	90918193	90918388	90918644	90918755	405	0.0099561	0.106341	0.0,0.05	0.269,0.216	-0.217	4748	ENSG00000234741.8	GAS5	chr1	-	173864483	173864704	173864674	173864704	173864256	173864304	0.0581204	0.41996	0.975,0.974	0.904,0.951
8349	ENSG00000132388.13	UBE2G1	chr17	-	4289229	4289408	4269258	4272516	4296716	4296814	328	0.000209956	0.0144822	1.0,1.0	0.703,0.925	0.186		4163	ENSG00000162413.16	KLHL21	chr1	-	6590723	6595557	6590723	6593658	6595484	6595557	1975	0.00997299	0.106341	0.289,0.369	0.576,1.0	-0.459	564	ENSG00000178982.10	EIF3K	chr19	+	38619195	38619327	38619195	38619317	38620336	38620435	0.0585318	0.421137	0.93,0.923	0.958,0.967
28994	ENSG00000245958.6	SEPTIN7P14	chr4	+	119543752	119543845	119512812	119512970	119550378	119550443	242	0.000211057	0.0144883	1.0,1.0	0.0,1.0	0.5		5896	ENSG00000116198.14	CEP104	chr1	-	3836494	3837519	3836494	3836692	3837291	3837519	748	0.00993381	0.106341	1.0,0.666	0.544,0.666	0.228	966	ENSG00000131470.15	PSMC3IP	chr17	-	42573818	42574210	42574098	42574210	42573477	42573623	0.058955	0.421746	0.197,0.24	0.427,0.343
31780	ENSG00000018189.13	RUFY3	chr4	+	70741626	70741680	70722010	70722751	70762518	70762692	203	0.000211473	0.0144883	0.216,0.063	0.026,0.0	0.127		4639	ENSG00000121310.17	ECHDC2	chr1	-	52897436	52899224	52897436	52897484	52899173	52899224	1838	0.0100306	0.106714	0.229,1.0	0.549,1.0	-0.16	7544	ENSG00000161265.15	U2AF1L4	chr19	-	35744011	35744145	35744069	35744145	35743808	35743904	0.0590153	0.421746	0.419,0.194	0.0,0.0
58142	ENSG00000065665.21	SEC61A2	chr10	+	12155777	12155931	12149851	12149961	12156906	12157067	303	0.000211473	0.0144883	0.944,0.948	0.689,0.651	0.276		2562	ENSG00000124356.17	STAMBP	chr2	+	73828975	73831059	73828975	73828996	73830844	73831059	1997	0.010179	0.107564	0.297,0.246	0.637,0.511	-0.303	7594	ENSG00000198589.14	LRBA	chr4	-	150798076	150798142	150798080	150798142	150761782	150761847	0.0590048	0.421746	0.0,0.163	0.196,0.196
36962	ENSG00000114126.18	TFDP2	chr3	-	142101734	142101841	142005440	142005544	142149182	142149470	256	0.000214098	0.0146352	1.0,1.0	0.421,0.865	0.357		8093	ENSG00000120697.10	ALG5	chr13	-	36993603	36995596	36993603	36993672	36995426	36995596	1903	0.0101623	0.107564	0.622,0.61	0.484,1.0	-0.126	6540	ENSG00000196642.19	RABL6	chr9	+	136837861	136838015	136837861	136837980	136838908	136839121	0.0593805	0.423403	1.0,1.0	0.951,0.896
27543	ENSG00000162105.20	SHANK2	chr11	-	70501922	70501931	70492334	70492465	70502205	70502286	158	0.000216254	0.0147306	0.414,0.274	0.0,0.0	0.344		8185	ENSG00000105699.17	LSR	chr19	+	35266678	35266967	35266678	35266738	35266835	35266967	246	0.0101627	0.107564	0.515,1.0	1.0,1.0	-0.242	4667	ENSG00000074416.15	MGLL	chr3	-	127822308	127823185	127823083	127823185	127821693	127821838	0.0596531	0.423638	0.0,1.0	1.0,1.0
32571	ENSG00000233967.7	RP11-250B2.3	chr6	+	80454109	80454227	80453156	80453261	80462871	80463063	267	0.000216462	0.0147306	0.0,0.309	0.626,1.0	-0.658		3922	ENSG00000159352.16	PSMD4	chr1	+	151264831	151265234	151264831	151264918	151265165	151265234	396	0.0103232	0.108843	0.0,0.108	0.012,0.014	0.041	5463	ENSG00000177542.11	SLC25A22	chr11	-	794452	794513	794469	794513	793528	793619	0.0596804	0.423638	0.473,0.729	1.0,0.0
30375	ENSG00000150787.8	PTS	chr11	+	112230207	112230230	112228593	112228673	112230625	112230682	172	0.000217564	0.0147725	0.603,0.867	1.0,1.0	-0.265		3660	ENSG00000064601.21	CTSA	chr20	+	45892724	45893311	45892724	45892880	45893219	45893311	488	0.0103706	0.1091	0.665,1.0	0.379,0.379	0.454	4669	ENSG00000148985.20	PGAP2	chr11	+	3824269	3824449	3824269	3824364	3825019	3825128	0.0599787	0.424292	0.241,0.614	0.203,0.0
52399	ENSG00000125846.16	ZNF133	chr20	+	18305007	18305178	18288282	18288604	18305680	18305807	320	0.000218315	0.0147905	0.583,0.0	1.0,1.0	-0.709		6574	ENSG00000178035.13	IMPDH2	chr3	-	49026518	49027047	49026518	49026609	49026686	49027047	226	0.010498	0.109949	0.38,0.678	0.132,0.274	0.326	6455	ENSG00000119402.18	FBXW2	chr9	-	120792886	120793257	120793148	120793257	120787768	120788278	0.06004	0.424292	0.195,0.0	0.303,1.0
44696	ENSG00000114796.16	KLHL24	chr3	+	183636220	183636311	183635622	183635747	183643479	183643542	240	0.000219229	0.0148194	1.0,1.0	0.383,0.651	0.483		7582	ENSG00000150316.12	CWC15	chr11	-	94970976	94971487	94970976	94971065	94971374	94971487	458	0.0104794	0.109949	0.016,0.036	0.048,0.056	-0.026	4736	ENSG00000082898.19	XPO1	chr2	-	61534422	61534584	61534557	61534584	61533771	61533903	0.0605235	0.426758	0.396,0.583	0.512,0.825
59077	ENSG00000025434.19	NR1H3	chr11	+	47260408	47260675	47259785	47259979	47261240	47261280	416	0.000220232	0.0148542	0.472,0.589	1.0,1.0	-0.47		1224	ENSG00000215041.10	NEURL4	chr17	-	7318268	7318674	7318268	7318356	7318494	7318674	287	0.0106495	0.111095	0.08,0.148	0.509,0.342	-0.311	7724	ENSG00000163617.11	CCDC191	chr3	-	114004386	114004746	114004636	114004746	114002455	114002538	0.0606753	0.42688	1.0,1.0	0.578,1.0
45402	ENSG00000035115.22	SH3YL1	chr2	-	224863	224920	218143	219001	229965	230044	206	0.000222235	0.0149562	0.178,0.0	0.491,0.536	-0.425		8113	ENSG00000126768.12	TIMM17B	chrX	-	48893899	48894225	48893899	48894010	48894096	48894225	235	0.0106545	0.111095	0.015,0.039	0.0,0.0	0.027	69	ENSG00000102393.14	GLA	chrX	-	101401232	101401809	101401631	101401809	101400665	101400757	0.0615801	0.429588	0.329,0.214	0.371,0.584
18271	ENSG00000139973.17	SYT16	chr14	+	62069602	62069815	61970131	61970311	62075134	62075391	362	0.000226271	0.0151791	1.0,0.553	0.0,0.292	0.63		1702	ENSG00000090905.19	TNRC6A	chr16	+	24805013	24805733	24805013	24805151	24805673	24805733	671	0.0107133	0.111461	0.739,0.836	0.513,0.55	0.256	616	ENSG00000105642.16	KCNN1	chr19	+	17989715	17989843	17989715	17989818	17993489	17993559	0.0617371	0.429588	1.0,1.0	0.774,0.682
37211	ENSG00000158545.16	ZC3H18	chr16	+	88587541	88587613	88586599	88586684	88598177	88598326	221	0.000226546	0.0151791	0.279,0.385	0.101,0.169	0.197		8269	ENSG00000065911.13	MTHFD2	chr2	+	74201381	74205889	74201381	74201479	74205704	74205889	4374	0.0107373	0.111465	1.0,1.0	0.488,0.719	0.397	4343	ENSG00000267106.8	ZNF561-AS1	chr19	+	9626783	9627806	9626783	9626860	9632227	9632417	0.0612602	0.429588	0.38,0.352	0.192,0.083
7972	ENSG00000175061.18	SNHG29	chr17	+	16439580	16439703	16439077	16439414	16440184	16440253	272	0.000231058	0.0154192	0.251,0.211	0.115,0.151	0.098		6329	ENSG00000159784.18	FAM131B	chr7	-	143359325	143359767	143359325	143359419	143359731	143359767	461	0.0109114	0.113023	0.492,0.467	0.267,0.139	0.277	4772	ENSG00000211460.12	TSN	chr2	+	121757239	121757434	121757239	121757333	121758709	121758806	0.0614358	0.429588	0.166,0.0	0.0,0.0
41954	ENSG00000196597.13	ZNF782	chr9	-	96844889	96845016	96827079	96827181	96851946	96852005	276	0.0002312	0.0154192	0.519,0.213	1.0,0.856	-0.562		3085	ENSG00000143801.18	PSEN2	chr1	+	226888828	226890133	226888828	226889049	226890034	226890133	1134	0.0109482	0.113156	0.081,0.208	1.0,0.208	-0.46	6115	ENSG00000118961.15	LDAH	chr2	-	20801291	20801465	20801309	20801465	20790254	20790398	0.0616335	0.429588	0.0,0.162	0.0,0.028
66733	ENSG00000102780.17	DGKH	chr13	+	42221161	42221394	42219685	42219794	42229098	42229250	382	0.00023165	0.0154192	0.0,0.609	1.0,1.0	-0.696		6420	ENSG00000137509.12	PRCP	chr11	-	82850323	82853278	82850323	82850505	82853176	82853278	2820	0.0109757	0.113191	0.023,0.037	0.02,0.006	0.017	5373	ENSG00000118518.17	RNF146	chr6	+	127266882	127267095	127266882	127266925	127280230	127280340	0.0618775	0.429622	0.651,0.584	1.0,0.584
60813	ENSG00000141446.11	ESCO1	chr18	-	21540576	21540700	21539919	21540009	21560858	21560981	273	0.000233039	0.0154778	0.0,0.12	1.0,0.45	-0.665		990	ENSG00000101347.11	SAMHD1	chr20	-	36911217	36912552	36911217	36911333	36912460	36912552	1276	0.0111692	0.114685	0.189,0.055	0.055,0.0	0.095	5968	ENSG00000110911.17	SLC11A2	chr12	-	50991486	50991672	50991598	50991672	50990794	50990948	0.062626	0.432924	0.067,0.222	0.102,0.054
48065	ENSG00000177542.11	SLC25A22	chr11	-	796042	796367	794986	795169	798216	798267	474	0.000234306	0.015528	0.136,0.136	0.485,1.0	-0.606		2476	ENSG00000118785.15	SPP1	chr4	+	87975713	87976949	87975713	87975800	87976881	87976949	1230	0.0111507	0.114685	0.057,0.118	0.022,0.029	0.062	6209	ENSG00000225484.7	NUTM2B-AS1	chr10	-	79808758	79808832	79808762	79808832	79806038	79806122	0.0625356	0.432924	0.883,0.83	0.945,0.919
12323	ENSG00000121903.15	ZSCAN20	chr1	+	33489517	33489602	33489114	33489191	33491024	33491702	234	0.000239257	0.0158217	0.56,0.489	1.0,1.0	-0.476		1166	ENSG00000177731.16	FLII	chr17	-	18253543	18254182	18253543	18253719	18254078	18254182	508	0.0112265	0.115023	0.14,0.051	0.178,0.137	-0.062	2385	ENSG00000242086.8	MUC20-OT1	chr3	+	195708133	195708387	195708133	195708268	195708746	195708807	0.0632763	0.435078	0.385,0.65	1.0,0.65
4607	ENSG00000008441.18	NFIX	chr19	+	13081679	13081855	13078612	13078735	13090298	13090390	325	0.000241613	0.0158969	0.733,0.861	1.0,1.0	-0.203		7547	ENSG00000163382.13	NAXE	chr1	+	156592556	156593555	156592556	156592670	156593407	156593555	886	0.0113607	0.116145	0.058,0.053	0.089,0.123	-0.05	6391	ENSG00000155229.21	MMS19	chr10	-	97461495	97461896	97461827	97461896	97460906	97461007	0.0633489	0.435078	0.945,1.0	0.926,0.905
16613	ENSG00000164114.19	MAP9	chr4	-	155355715	155355884	155355070	155355160	155357448	155357519	318	0.000241626	0.0158969	0.584,0.484	1.0,1.0	-0.466		5771	ENSG00000197580.13	BCO2	chr11	+	112193473	112194755	112193473	112193994	112194652	112194755	807	0.0115093	0.11741	1.0,1.0	1.0,0.085	0.458	7486	ENSG00000110987.9	BCL7A	chr12	+	122054804	122054989	122054804	122054926	122059091	122062044	0.0632503	0.435078	0.231,0.042	0.119,0.017
47101	ENSG00000163539.18	CLASP2	chr3	-	33577201	33577264	33576168	33576275	33581820	33581928	212	0.000241963	0.0158969	0.12,0.115	0.0,0.025	0.105		3299	ENSG00000214595.12	EML6	chr2	+	54866765	54869367	54866765	54866884	54869180	54869367	2445	0.0116206	0.11829	0.442,0.337	0.284,0.02	0.238	802	ENSG00000185624.16	P4HB	chr17	-	81845459	81845742	81845560	81845742	81845143	81845230	0.0641253	0.43561	0.017,0.019	0.09,0.09
23049	ENSG00000143801.18	PSEN2	chr1	+	226890034	226890133	226888828	226889049	226891277	226891344	248	0.000244403	0.0159881	0.706,1.0	0.231,0.375	0.55		5203	ENSG00000166340.18	TPP1	chr11	-	6617625	6619267	6617625	6618915	6619195	6619267	429	0.0117608	0.119459	0.258,0.051	0.035,0.055	0.11	2332	ENSG00000197345.13	MRPL21	chr11	-	68893321	68893455	68893402	68893455	68892889	68892993	0.0646398	0.43561	0.036,0.077	0.058,0.0
55806	ENSG00000198467.16	TPM2	chr9	-	35684731	35684807	35684487	35684550	35685063	35685139	225	0.000244258	0.0159881	0.61,0.673	0.945,0.869	-0.266		1771	ENSG00000175344.19	CHRNA7	chr15	+	32158411	32159655	32158411	32158606	32159568	32159655	1111	0.011954	0.1209	0.652,0.547	1.0,0.518	-0.159	2351	ENSG00000247708.8	STX18-AS1	chr4	+	4542142	4542625	4542142	4542475	4544737	4544907	0.0648137	0.43561	0.0,0.166	0.428,0.199
53831	ENSG00000107957.16	SH3PXD2A	chr10	-	103622469	103622553	103617196	103617314	103627088	103627202	233	0.000245772	0.0160432	0.365,0.434	1.0,0.719	-0.46		8128	ENSG00000122566.22	HNRNPA2B1	chr7	-	26196806	26197461	26196806	26197017	26197314	26197461	446	0.0119507	0.1209	0.035,0.031	0.046,0.049	-0.014	2890	ENSG00000105705.16	SUGP1	chr19	-	19316246	19316593	19316421	19316593	19310096	19310200	0.0645726	0.43561	0.0,0.0	0.045,0.018
64310	ENSG00000151239.14	TWF1	chr12	-	43804175	43804240	43802283	43802464	43804494	43804572	214	0.000246405	0.0160501	0.218,0.207	0.0,0.0	0.212		2784	ENSG00000006744.19	ELAC2	chr17	-	12994763	12995062	12994763	12994884	12994962	12995062	227	0.0120659	0.121636	0.36,0.18	0.0,0.18	0.18	3179	ENSG00000116852.15	KIF21B	chr1	-	201004540	201004933	201004765	201004933	201004339	201004455	0.0649093	0.43561	0.017,0.07	0.127,0.096
31847	ENSG00000198715.13	GLMP	chr1	-	156294758	156295016	156294364	156294565	156295525	156295654	407	0.000247987	0.0161186	0.739,0.862	1.0,1.0	-0.2		3592	ENSG00000130816.17	DNMT1	chr19	-	10139675	10140328	10139675	10139817	10140045	10140328	377	0.0121077	0.121636	0.069,0.078	0.141,0.113	-0.053	3680	ENSG00000125124.14	BBS2	chr16	-	56501944	56502456	56502316	56502456	56501352	56501497	0.064904	0.43561	0.164,0.263	0.177,0.067
2279	ENSG00000171700.14	RGS19	chr20	-	64076856	64076954	64076524	64076646	64079293	64079518	247	0.000248922	0.0161449	0.707,0.287	1.0,1.0	-0.503		4104	ENSG00000161204.11	ABCF3	chr3	+	184189087	184189277	184189087	184189144	184189254	184189277	259	0.0121169	0.121636	0.034,0.042	0.137,0.092	-0.076	4093	ENSG00000132122.12	SPATA6	chr1	-	48355669	48355769	48355717	48355769	48305786	48305878	0.0639551	0.43561	0.672,0.847	0.645,0.431
42393	ENSG00000284879.1	RP13-511M20.1	chr2	+	87583257	87583346	87455475	87455645	87606592	87606769	238	0.000252243	0.0163255	0.758,0.697	1.0,1.0	-0.272		6874	ENSG00000196305.19	IARS1	chr9	-	92250712	92251885	92250712	92250759	92251807	92251885	1197	0.01213	0.121636	0.94,1.0	0.836,0.849	0.127	4495	ENSG00000075702.19	WDR62	chr19	+	36102013	36102248	36102013	36102151	36102736	36102851	0.0646251	0.43561	0.137,0.0	0.0,0.027
49455	ENSG00000002746.15	HECW1	chr7	+	43243874	43243932	43112644	43112937	43311762	43312087	207	0.000254806	0.0164563	0.456,0.083	0.0,0.0	0.27		1869	ENSG00000154134.15	ROBO3	chr11	+	124877518	124878131	124877518	124877658	124877936	124878131	427	0.0122172	0.121875	1.0,0.624	0.482,0.428	0.357	5030	ENSG00000180228.14	PRKRA	chr2	-	178447455	178447586	178447504	178447586	178444421	178444500	0.0648687	0.43561	0.042,0.058	0.026,0.012
35902	ENSG00000162994.16	CLHC1	chr2	-	55209403	55209516	55206269	55206376	55209629	55209652	262	0.000258308	0.0166472	0.63,0.0	1.0,0.695	-0.532		2515	ENSG00000011143.19	MKS1	chr17	-	58214258	58216736	58214258	58216243	58216665	58216736	571	0.0122138	0.121875	1.0,0.0	0.511,1.0	-0.256	5921	ENSG00000164896.20	FASTK	chr7	-	151078841	151079021	151078922	151079021	151078561	151078701	0.0649364	0.43561	0.96,0.832	1.0,0.94
54922	ENSG00000259905.7	PWRN1	chr15	+	24587566	24587735	24574906	24575003	24623967	24624105	318	0.000259939	0.0167169	1.0,1.0	0.484,0.584	0.466		4193	ENSG00000138095.20	LRPPRC	chr2	-	43976142	43977052	43976142	43976229	43976993	43977052	913	0.0122315	0.121875	0.046,0.017	0.009,0.016	0.019	6696	ENSG00000174197.17	MGA	chr15	+	41736180	41736698	41736180	41736368	41739905	41740203	0.0636943	0.43561	1.0,1.0	0.685,0.841
57211	ENSG00000068489.13	PRR11	chr17	+	59163598	59163664	59160758	59160876	59169747	59169819	215	0.00026106	0.0167535	0.0,0.581	1.0,1.0	-0.71		3859	ENSG00000137312.15	FLOT1	chr6	-	30741189	30741704	30741189	30741333	30741613	30741704	429	0.0122644	0.121945	0.47,0.441	0.64,0.566	-0.147	2280	ENSG00000124356.17	STAMBP	chr2	+	73828966	73829510	73828966	73828996	73830844	73831059	0.0653783	0.436727	0.581,0.569	0.797,0.734
3598	ENSG00000105552.15	BCAT2	chr19	-	48807755	48808236	48806999	48807074	48810983	48811027	630	0.000261677	0.0167578	0.759,0.728	1.0,1.0	-0.256		285	ENSG00000182093.16	GET1	chr21	+	39405913	39406731	39405913	39406058	39406561	39406731	652	0.0124647	0.123416	0.478,0.762	1.0,0.715	-0.237	5224	ENSG00000265681.8	RPL17	chr18	-	49491735	49491833	49491745	49491833	49491531	49491584	0.0653527	0.436727	0.824,0.738	0.506,0.682
60794	ENSG00000196569.13	LAMA2	chr6	+	129475389	129475401	129473213	129473352	129478692	129478813	161	0.000266126	0.0170069	0.316,0.058	0.0,0.0	0.187		4276	ENSG00000114388.14	NPRL2	chr3	-	50349664	50350022	50349664	50349833	50349930	50350022	246	0.0124447	0.123416	0.063,0.0	0.073,0.115	-0.062	1682	ENSG00000158773.14	USF1	chr1	-	161042554	161042670	161042585	161042670	161042115	161042217	0.0666751	0.441932	0.713,0.741	0.623,0.542
45361	ENSG00000167703.15	SLC43A2	chr17	-	1586948	1586960	1585912	1586051	1590801	1590948	161	0.000266987	0.0170262	0.236,0.41	0.0,0.0	0.323		6180	ENSG00000146830.11	GIGYF1	chr7	-	100688591	100689555	100688591	100688718	100689301	100689555	732	0.0125374	0.123876	0.706,0.742	0.455,0.602	0.196	1770	ENSG00000181163.14	NPM1	chr5	+	171400152	171400925	171400152	171400210	171405301	171405403	0.066586	0.441932	0.635,0.635	0.7,0.832
59093	ENSG00000151849.16	CENPJ	chr13	-	24886234	24886385	24885605	24885670	24889315	24889355	300	0.00026809	0.0170607	0.043,0.0	0.332,0.124	-0.207		7741	ENSG00000246695.8	RASSF8-AS1	chr12	-	25952757	25955241	25952757	25953076	25955137	25955241	2210	0.0126365	0.124594	0.768,1.0	1.0,0.426	0.171	2686	ENSG00000108384.15	RAD51C	chr17	+	58692572	58692788	58692572	58692685	58694930	58695189	0.0663087	0.441932	0.747,0.816	1.0,0.703
58794	ENSG00000072134.15	EPN2	chr17	+	19313122	19313279	19312051	19312144	19328710	19328887	306	0.000268773	0.0170685	0.8,0.905	1.0,1.0	-0.147		871	ENSG00000063177.13	RPL18	chr19	-	48616078	48617423	48616078	48616202	48617315	48617423	1262	0.0128314	0.125466	0.515,0.713	1.0,1.0	-0.386	3441	ENSG00000153250.20	RBMS1	chr2	-	160286968	160287084	160286977	160287084	160284994	160285044	0.0667146	0.441932	0.538,0.573	0.657,0.637
10892	ENSG00000178761.15	FAM219B	chr15	-	74904981	74905059	74904663	74904712	74905153	74905231	227	0.000270308	0.0170946	0.092,0.112	0.253,0.332	-0.19		1169	ENSG00000131899.11	LLGL1	chr17	+	18236834	18237773	18236834	18236939	18237480	18237773	690	0.0127843	0.125466	0.107,0.059	0.045,0.043	0.039	735	ENSG00000196628.20	TCF4	chr18	-	55232508	55232671	55232520	55232671	55228846	55229076	0.0674468	0.442167	0.665,0.466	0.714,0.752
55832	ENSG00000184949.18	FAM227A	chr22	-	38639614	38639724	38638745	38638822	38645562	38645645	259	0.000270145	0.0170946	0.924,1.0	0.633,0.76	0.265		1293	ENSG00000185324.22	CDK10	chr16	+	89693273	89694232	89693273	89693467	89694172	89694232	854	0.0128024	0.125466	0.174,0.31	0.332,0.449	-0.149	793	ENSG00000176155.19	CCDC57	chr17	-	82207730	82208048	82207846	82208048	82201537	82201952	0.0674285	0.442167	0.567,1.0	1.0,1.0
30843	ENSG00000107518.18	ATRNL1	chr10	+	115334281	115334419	115315517	115315736	115394658	115394752	287	0.000272943	0.0172254	0.836,0.827	1.0,0.945	-0.141		1526	ENSG00000162066.16	AMDHD2	chr16	+	2520768	2521123	2520768	2520905	2520983	2521123	227	0.0128143	0.125466	0.247,0.127	0.0,0.0	0.187	3213	ENSG00000204628.12	RACK1	chr5	-	181242169	181242345	181242173	181242345	181241491	181241563	0.0670628	0.442167	0.781,0.886	0.864,1.0
6144	ENSG00000173821.19	RNF213	chr17	+	80278763	80278910	80273240	80273404	80287814	80288363	296	0.000273963	0.017254	0.189,0.274	0.126,0.0	0.169		5721	ENSG00000204256.14	BRD2	chr6	+	32976561	32977570	32976561	32976936	32977259	32977570	472	0.0128765	0.125646	1.0,0.947	0.903,0.876	0.084	4361	ENSG00000115042.10	FAHD2A	chr2	+	95410526	95411026	95410526	95410586	95412433	95412542	0.0672971	0.442167	0.929,0.842	0.647,0.876
34643	ENSG00000116138.13	DNAJC16	chr1	+	15560130	15560329	15559607	15559656	15562141	15562325	348	0.00027498	0.0172823	0.0,0.0	0.631,0.146	-0.389		6029	ENSG00000138434.17	ITPRID2	chr2	+	181915215	181918675	181915215	181916427	181918597	181918675	2319	0.0129459	0.126062	0.401,0.378	0.687,0.536	-0.222	4807	ENSG00000125375.17	DMAC2L	chr14	+	50312323	50313060	50312323	50312389	50314590	50314626	0.0672976	0.442167	0.45,0.476	0.744,0.8
51067	ENSG00000177683.14	THAP5	chr7	-	108565951	108566022	108564569	108565105	108569098	108569256	220	0.000277047	0.0173763	0.404,0.448	1.0,0.772	-0.46		3700	ENSG00000145362.21	ANK2	chr4	+	113369513	113373173	113369513	113369805	113373089	113373173	3433	0.013065	0.12696	0.183,0.148	0.089,0.071	0.085	610	ENSG00000005007.13	UPF1	chr19	+	18852986	18853104	18852986	18853071	18853251	18853350	0.0676142	0.44235	0.0,0.105	0.083,0.183
53637	ENSG00000104381.14	GDAP1	chr8	+	74351453	74351466	74351273	74351321	74360136	74360310	162	0.000278218	0.0174138	0.0,0.0	0.269,0.269	-0.269		1730	ENSG00000166946.14	CCNDBP1	chr15	+	43194080	43194461	43194080	43194137	43194414	43194461	426	0.0131888	0.127868	0.512,0.677	0.583,1.0	-0.197	1260	ENSG00000197021.9	EOLA2	chrX	-	149937413	149937480	149937432	149937480	149934004	149934137	0.0688615	0.44696	0.307,0.0	0.228,0.307
64488	ENSG00000120798.17	NR2C1	chr12	-	95031348	95031488	95028386	95028524	95040475	95040597	289	0.000279686	0.0174697	1.0,1.0	0.745,0.783	0.236		4635	ENSG00000141504.12	SAT2	chr17	-	7627362	7627805	7627362	7627414	7627569	7627805	304	0.0132128	0.127868	0.329,0.109	0.269,0.688	-0.259	2685	ENSG00000106397.12	PLOD3	chr7	-	101216162	101216326	101216196	101216326	101215907	101216020	0.0689805	0.44696	1.0,0.929	0.731,1.0
296	ENSG00000101966.13	XIAP	chrX	+	123860166	123860293	123859723	123859905	123885630	123885711	276	0.000283046	0.0176434	0.351,0.213	0.618,1.0	-0.527		5581	ENSG00000172053.18	QARS1	chr3	-	49097991	49098480	49097991	49098117	49098191	49098480	223	0.0132585	0.128048	0.005,0.012	0.044,0.024	-0.026	2948	ENSG00000177830.18	CHID1	chr11	-	902147	902330	902197	902330	900935	900980	0.0687737	0.44696	0.059,0.1	0.073,0.0
64160	ENSG00000151746.15	BICD1	chr12	+	32367669	32367745	32337498	32337706	32377539	32377923	225	0.000284363	0.0176892	0.828,0.726	0.914,1.0	-0.18		2790	ENSG00000124593.16	RP11-298J23.10	chr6	+	41783461	41784238	41783461	41783605	41784130	41784238	674	0.0133176	0.128067	0.228,0.677	0.653,1.0	-0.374	5119	ENSG00000144591.20	GMPPA	chr2	+	219498900	219499254	219498900	219498938	219499960	219500015	0.0687344	0.44696	1.0,1.0	0.138,1.0
31032	ENSG00000028203.18	VEZT	chr12	+	95298861	95298943	95296050	95296258	95300164	95300562	231	0.000285656	0.0177334	0.273,0.15	0.047,0.0	0.188		6549	ENSG00000187801.15	ZFP69B	chr1	+	40456944	40457439	40456944	40457071	40457343	40457439	421	0.013342	0.128067	0.68,0.515	1.0,1.0	-0.402	7788	ENSG00000072110.16	ACTN1	chr14	-	68878457	68879069	68878988	68879069	68877081	68877240	0.0690231	0.44696	0.104,0.097	0.066,0.085
14963	ENSG00000175471.19	MCTP1	chr5	-	94714776	94714886	94710817	94710927	94779109	94779163	259	0.00029173	0.0180736	0.535,0.59	1.0,1.0	-0.438		8227	ENSG00000092203.15	TOX4	chr14	+	21487450	21488850	21487450	21487693	21488589	21488850	1045	0.0133243	0.128067	0.253,0.222	0.543,0.469	-0.269	4331	ENSG00000128581.17	IFT22	chr7	-	101318123	101319032	101318955	101319032	101316339	101316542	0.0705042	0.455121	0.711,0.61	0.451,0.538
45440	ENSG00000106829.20	TLE4	chr9	+	79649819	79649858	79627373	79627448	79652589	79652798	188	0.000293057	0.0181189	0.015,0.0	0.059,0.174	-0.109		6569	ENSG00000178035.13	IMPDH2	chr3	-	49024342	49024578	49024342	49024404	49024494	49024578	239	0.013383	0.128199	0.048,0.043	0.151,0.1	-0.08	6805	ENSG00000177595.19	PIDD1	chr11	-	800984	801120	801017	801120	800761	800912	0.0705704	0.455121	0.868,0.891	1.0,1.0
52694	ENSG00000104299.15	INTS9	chr8	-	28862039	28862212	28859435	28859563	28889873	28889934	322	0.000294472	0.0181694	0.0,0.0	0.112,0.134	-0.123		1229	ENSG00000132522.16	GPS2	chr17	-	7313567	7313988	7313567	7313721	7313905	7313988	333	0.0134787	0.128727	0.119,0.111	0.14,0.264	-0.087	2960	ENSG00000130414.13	NDUFA10	chr2	-	240012331	240014860	240014738	240014860	240011616	240011696	0.0715961	0.4608	0.297,0.298	0.213,0.23
3066	ENSG00000088888.18	MAVS	chr20	+	3861331	3861504	3857634	3857809	3862253	3862413	322	0.000295613	0.0182029	1.0,1.0	0.832,0.819	0.175		4936	ENSG00000085465.13	OVGP1	chr1	-	111421275	111421673	111421275	111421461	111421564	111421673	252	0.0134928	0.128727	0.372,1.0	0.0,0.0	0.686	431	ENSG00000131848.10	ZSCAN5A	chr19	-	56314619	56314839	56314680	56314839	56313282	56313384	0.0718377	0.461419	0.415,0.151	0.587,0.415
18132	ENSG00000124508.17	BTN2A2	chr6	+	26385014	26385362	26383791	26383915	26388012	26388289	497	0.000296564	0.0182246	0.524,0.643	1.0,1.0	-0.416		7534	ENSG00000132740.10	IGHMBP2	chr11	+	68929733	68930434	68929733	68929843	68929891	68930434	197	0.0137093	0.13053	0.752,0.654	1.0,0.602	-0.098	5391	ENSG00000112306.8	RPS12	chr6	+	132814971	132815224	132814971	132815088	132816460	132816563	0.0720506	0.461851	0.036,0.045	0.046,0.073
51193	ENSG00000148335.15	NTMT1	chr9	+	129632649	129632801	129626174	129626295	129634053	129634306	301	0.000301263	0.018476	0.497,0.598	1.0,0.798	-0.352		4129	ENSG00000168970.22	JMJD7-PLA2G4B	chr15	+	41836474	41836940	41836474	41836551	41836780	41836940	378	0.0138504	0.131606	0.408,0.228	0.095,0.147	0.197	6362	ENSG00000048540.15	LMO3	chr12	-	16600600	16600868	16600654	16600868	16560412	16560538	0.0726817	0.464958	0.37,0.329	0.14,0.115
60736	ENSG00000166444.19	DENND2B	chr11	-	8729949	8731209	8726072	8726209	8750620	8750725	1409	0.000310722	0.0190178	0.656,0.786	1.0,0.891	-0.224		3387	ENSG00000170949.18	ZNF160	chr19	-	53091412	53091720	53091412	53091529	53091636	53091720	256	0.0139206	0.131743	0.865,0.875	1.0,1.0	-0.13	705	ENSG00000100242.15	SUN2	chr22	-	38740888	38741050	38741006	38741050	38740266	38740432	0.0731722	0.467154	0.085,0.173	0.271,0.246
17413	ENSG00000124357.13	NAGK	chr2	+	71076603	71076701	71072640	71073594	71077557	71077605	247	0.000314891	0.0191974	1.0,1.0	0.784,0.644	0.286		6989	ENSG00000130714.19	POMT1	chr9	+	131511336	131512136	131511336	131511472	131512040	131512136	717	0.0139099	0.131743	1.0,0.624	0.744,0.421	0.23	521	ENSG00000105771.14	SMG9	chr19	-	43739672	43740218	43740106	43740218	43738121	43738217	0.0733301	0.467221	0.079,0.052	0.02,0.05
40151	ENSG00000179818.15	PCBP1-AS1	chr2	-	70015447	70015580	69996685	69996888	70018014	70018097	282	0.000314918	0.0191974	0.0,0.0	0.514,0.209	-0.361		5205	ENSG00000166340.18	TPP1	chr11	-	6619195	6619413	6619195	6619267	6619383	6619413	265	0.0142165	0.134209	0.174,0.287	0.0,0.273	0.094	472	ENSG00000010361.14	FUZ	chr19	-	49812446	49812736	49812614	49812736	49812250	49812335	0.0738651	0.467841	0.055,0.19	0.32,0.105
30381	ENSG00000288558.2	DUS4L-BCAP29	chr7	+	107573703	107573883	107571144	107571266	107575187	107575310	329	0.000317447	0.0193128	0.613,0.475	1.0,1.0	-0.456		5757	ENSG00000145736.14	GTF2H2	chr5	-	71048761	71049158	71048761	71048849	71049067	71049158	367	0.0142381	0.134209	0.039,0.0	0.111,0.069	-0.07	2108	ENSG00000140464.20	PML	chr15	+	74033155	74033422	74033155	74033414	74034477	74034530	0.0738696	0.467841	0.16,0.289	0.192,0.0
19256	ENSG00000127952.17	STYXL1	chr7	-	76021850	76021992	76013741	76013887	76028641	76028671	291	0.000319154	0.019378	1.0,1.0	0.952,0.8	0.124		7736	ENSG00000084453.17	SLCO1A2	chr12	-	21293944	21295792	21293944	21294110	21295596	21295792	1635	0.0143213	0.134723	1.0,0.353	1.0,1.0	-0.324	6339	ENSG00000197912.16	SPG7	chr16	+	89554485	89556085	89554485	89554563	89556886	89557173	0.0736217	0.467841	0.031,0.028	0.065,0.033
2247	ENSG00000281903.2	LINC02246	chr21	-	14853273	14853431	14825522	14825624	14857541	14857708	307	0.000320004	0.0193908	0.0,0.195	0.814,0.493	-0.556		2175	ENSG00000206149.10	HERC2P9	chr15	+	28655272	28655691	28655272	28655420	28655494	28655691	223	0.0144316	0.135179	0.595,0.641	0.76,0.9	-0.212	5132	ENSG00000064012.22	CASP8	chr2	+	201276826	201277104	201276826	201276968	201284815	201285317	0.0745618	0.471284	0.511,0.116	1.0,0.0
40789	ENSG00000115363.14	EVA1A	chr2	-	75526111	75526199	75518055	75518208	75560679	75560938	237	0.000322333	0.0194932	0.386,1.0	0.0,0.0	0.693		2305	ENSG00000105136.21	ZNF419	chr19	+	57491470	57492211	57491470	57491597	57492112	57492211	664	0.0144558	0.135179	0.298,0.428	0.23,0.06	0.218	316	ENSG00000124222.22	STX16	chr20	+	58652072	58652138	58652072	58652087	58659622	58659634	0.0747905	0.471408	0.377,0.478	0.598,0.615
15372	ENSG00000081377.17	CDC14B	chr9	-	96515648	96515792	96503564	96503789	96522505	96522603	293	0.000324884	0.0196085	0.67,0.821	1.0,1.0	-0.254		2392	ENSG00000104313.20	EYA1	chr8	-	71321733	71322268	71321733	71321879	71322198	71322268	468	0.014424	0.135179	0.347,0.298	0.0,0.137	0.254	4749	ENSG00000234741.8	GAS5	chr1	-	173865470	173865547	173865509	173865547	173864256	173864304	0.0748785	0.471408	0.613,1.0	1.0,0.442
31631	ENSG00000112972.15	HMGCS1	chr5	-	43298008	43298134	43297001	43297166	43298517	43298975	275	0.00032587	0.019629	0.937,0.947	0.892,0.87	0.061		5016	ENSG00000163516.14	ANKZF1	chr2	+	219234132	219235312	219234132	219234288	219234825	219235312	686	0.014499	0.135314	0.782,1.0	0.695,0.537	0.275	2432	ENSG00000175193.14	PARL	chr3	-	183862696	183862801	183862752	183862801	183844230	183844326	0.075401	0.473535	0.074,0.012	0.097,0.097
10108	ENSG00000122390.19	NAA60	chr16	+	3447481	3447620	3443693	3443837	3448470	3448540	288	0.000327487	0.0196874	0.756,0.256	1.0,1.0	-0.494		6312	ENSG00000102901.13	CENPT	chr16	-	67832011	67832545	67832011	67832108	67832227	67832545	268	0.0146176	0.136152	0.037,0.032	0.122,0.085	-0.069	3396	ENSG00000090861.17	AARS1	chr16	-	70253665	70253800	70253713	70253800	70253267	70253381	0.0755148	0.473535	0.0,0.115	0.0,0.0
2217	ENSG00000215386.13	MIR99AHG	chr21	+	16589352	16589467	16537378	16537439	16594339	16594454	264	0.000329594	0.019775	0.042,0.0	0.261,0.244	-0.232		1431	ENSG00000102879.16	CORO1A	chr16	+	30185208	30186720	30185208	30185407	30186597	30186720	1339	0.0146762	0.136428	1.0,0.527	1.0,0.234	0.147	7351	ENSG00000139546.11	TARBP2	chr12	+	53503026	53503212	53503026	53503129	53503729	53503808	0.0769167	0.481374	0.3,0.391	0.0,0.3
65942	ENSG00000126070.20	AGO3	chr1	+	35984469	35984548	35982620	35982712	36004340	36004475	228	0.000332755	0.0198862	0.466,0.521	0.766,1.0	-0.389		1989	ENSG00000169228.14	RAB24	chr5	-	177301924	177302496	177301924	177301987	177302127	177302496	289	0.0147784	0.136806	0.0,0.093	0.147,0.114	-0.084	4577	ENSG00000039560.14	RAI14	chr5	+	34757467	34757614	34757467	34757598	34795938	34796027	0.0772245	0.482349	0.02,0.0	0.038,0.065
66390	ENSG00000180776.16	ZDHHC20	chr13	-	21381900	21381945	21381433	21381549	21382919	21383009	194	0.00033234	0.0198862	0.573,0.18	0.113,0.0	0.32		7468	ENSG00000149823.9	VPS51	chr11	+	65109704	65110603	65109704	65109923	65110481	65110603	707	0.0148039	0.136806	0.133,0.19	0.069,0.076	0.089	7042	ENSG00000132740.10	IGHMBP2	chr11	+	68906068	68906242	68906068	68906238	68908144	68908337	0.07814	0.486154	0.0,0.122	0.0,0.594
1616	ENSG00000186575.19	NF2	chr22	+	29636750	29636876	29603555	29604112	29642201	29642285	275	0.000336324	0.0200601	1.0,1.0	0.655,0.619	0.363		8147	ENSG00000111218.12	PRMT8	chr12	+	3549935	3553714	3549935	3550091	3553650	3553714	3708	0.014793	0.136806	0.176,0.325	0.43,0.783	-0.356	7754	ENSG00000182899.17	RPL35A	chr3	+	197950189	197950299	197950189	197950221	197950935	197950978	0.0780152	0.486154	0.273,0.288	0.104,0.198
17487	ENSG00000145335.17	SNCA	chr4	-	89836742	89836789	89835546	89835692	89836961	89837015	196	0.000344453	0.0204301	0.275,0.275	0.0,0.0	0.275		26	ENSG00000198753.12	PLXNB3	chrX	+	153777527	153778095	153777527	153777688	153777947	153778095	408	0.0148774	0.137215	0.154,0.14	0.0,0.154	0.07	127	ENSG00000046651.16	OFD1	chrX	+	13756577	13756771	13756577	13756767	13757659	13757790	0.0793214	0.486319	0.493,0.0	0.109,0.0
32600	ENSG00000143458.12	GABPB2	chr1	+	151103561	151103675	151097851	151098002	151107036	151107177	263	0.000343327	0.0204301	0.729,0.773	1.0,1.0	-0.249		4089	ENSG00000164068.16	RNF123	chr3	+	49704649	49705186	49704649	49704756	49704983	49705186	376	0.0150158	0.137968	0.241,0.137	0.0,0.117	0.131	378	ENSG00000101310.17	SEC23B	chr20	+	18507939	18508297	18507939	18507972	18510821	18511056	0.0788268	0.486319	0.039,0.014	0.043,0.095
43552	ENSG00000268750.7	CTD-2583A14.10	chr19	+	57839022	57839149	57830311	57830564	57858575	57858641	276	0.00034472	0.0204301	1.0,1.0	0.351,0.0	0.825		4535	ENSG00000115414.21	FN1	chr2	-	215384019	215384976	215384019	215384184	215384859	215384976	824	0.0150175	0.137968	0.028,0.03	0.018,0.017	0.011	534	ENSG00000105723.13	GSK3A	chr19	-	42241900	42242602	42242182	42242602	42239954	42240142	0.0793927	0.486319	0.103,0.147	0.172,1.0
59002	ENSG00000164715.6	LMTK2	chr7	+	98203573	98203706	98191613	98194572	98205463	98209638	282	0.000345215	0.0204301	0.649,0.346	1.0,1.0	-0.502		5732	ENSG00000143499.14	SMYD2	chr1	+	214332017	214334308	214332017	214332192	214334199	214334308	2156	0.0150829	0.13803	0.2,0.207	0.333,0.399	-0.162	1800	ENSG00000079432.9	CIC	chr19	+	42294172	42294304	42294172	42294298	42294603	42294735	0.0786305	0.486319	0.59,0.0	1.0,0.325
26330	ENSG00000168061.17	SAC3D1	chr11	+	65043024	65043164	65041244	65041866	65044224	65044673	289	0.000347917	0.0205501	0.241,0.079	0.0,0.0	0.16		6755	ENSG00000137145.21	DENND4C	chr9	+	19336269	19336832	19336269	19336414	19336685	19336832	420	0.0150728	0.13803	0.68,1.0	0.415,0.739	0.263	2953	ENSG00000145868.17	FBXO38	chr5	+	148427212	148427947	148427212	148427722	148433423	148433524	0.0787222	0.486319	1.0,0.821	1.0,0.582
56463	ENSG00000169071.15	ROR2	chr9	-	91883257	91883383	91775740	91775818	91949866	91950228	275	0.00034866	0.0205541	0.351,0.0	1.0,1.0	-0.825		4838	ENSG00000139168.9	ZCRB1	chr12	-	42322417	42324104	42322417	42322446	42324018	42324104	1721	0.0152092	0.138917	0.071,0.115	0.055,0.038	0.046	5862	ENSG00000142541.18	RPL13A	chr19	+	49489849	49489922	49489849	49489912	49490231	49490297	0.0789615	0.486319	0.987,0.977	0.975,0.976
4373	ENSG00000105662.16	CRTC1	chr19	+	18771441	18771546	18768484	18768793	18775640	18775821	254	0.000350637	0.0206306	0.824,0.468	0.909,1.0	-0.308		4591	ENSG00000141837.22	CACNA1A	chr19	-	13210616	13212216	13210616	13210652	13212102	13212216	1599	0.0153039	0.139339	0.359,1.0	1.0,0.0	0.179	6007	ENSG00000221914.11	PPP2R2A	chr8	+	26293665	26293860	26293665	26293740	26338889	26338987	0.0792402	0.486319	0.0,0.027	0.142,0.033
3203	ENSG00000204514.10	ZNF814	chr19	-	57876915	57877042	57850314	57850561	57888766	57888780	276	0.000358074	0.0209261	0.73,1.0	0.351,0.245	0.567		7432	ENSG00000168000.16	BSCL2	chr11	-	62690786	62691421	62690786	62691141	62691279	62691421	287	0.0153146	0.139339	0.124,0.115	0.055,0.0	0.092	7849	ENSG00000100749.9	VRK1	chr14	+	96855223	96855356	96855223	96855352	96856129	96856250	0.0790528	0.486319	0.836,1.0	1.0,1.0
26992	ENSG00000093000.19	NUP50	chr22	+	45170987	45171143	45168167	45168246	45171599	45171683	305	0.000357241	0.0209261	0.328,0.122	0.0,0.0	0.225		8214	ENSG00000165801.10	ARHGEF40	chr14	+	21075331	21075765	21075331	21075499	21075644	21075765	294	0.0154709	0.14049	0.145,0.126	0.0,0.0	0.136	5912	ENSG00000106462.12	EZH2	chr7	-	148846469	148846598	148846496	148846598	148832633	148832750	0.0796525	0.48697	0.816,0.772	0.743,0.674
31862	ENSG00000105221.18	AKT2	chr19	-	40268583	40268685	40265221	40265351	40269422	40269540	251	0.000358411	0.0209261	0.229,0.0	1.0,0.372	-0.571		4109	ENSG00000129422.14	MTUS1	chr8	-	17653424	17654666	17653424	17653498	17654560	17654666	1211	0.0155454	0.140895	0.471,0.677	0.721,1.0	-0.286	5856	ENSG00000147454.14	SLC25A37	chr8	+	23566107	23566813	23566107	23566336	23568321	23568378	0.0801926	0.489329	1.0,1.0	0.732,0.833
62005	ENSG00000169919.17	GUSB	chr7	-	65970281	65970366	65967730	65967907	65974294	65974401	234	0.000357775	0.0209261	0.718,0.389	0.817,1.0	-0.355		8309	ENSG00000072110.16	ACTN1	chr14	-	68877081	68879069	68877081	68877240	68878988	68879069	1897	0.0156052	0.141166	0.064,0.059	0.033,0.053	0.019	4049	ENSG00000144535.20	DIS3L2	chr2	+	232130618	232130943	232130618	232130719	232136471	232136719	0.0812415	0.494778	0.056,0.078	0.055,0.015
37140	ENSG00000183354.12	KIAA2026	chr9	-	5944870	5944960	5929043	5929159	5954015	5954095	239	0.000359163	0.0209299	0.696,0.686	1.0,1.0	-0.309		3361	ENSG00000171453.20	POLR1C	chr6	+	43519705	43520185	43519705	43519838	43520065	43520185	376	0.0157284	0.141513	0.27,0.149	0.289,0.38	-0.125	4785	ENSG00000198690.10	FAN1	chr15	+	30903911	30904024	30903911	30904011	30904511	30905897	0.0817175	0.496723	1.0,0.283	0.479,0.0
21094	ENSG00000163607.17	GTPBP8	chr3	+	112995134	112995265	112993025	112993124	112996891	112996991	280	0.00036008	0.0209432	1.0,0.9	0.771,0.415	0.357		3715	ENSG00000000971.16	CFH	chr1	+	196740618	196742051	196740618	196740792	196741874	196742051	1231	0.0157071	0.141513	0.063,0.326	1.0,0.326	-0.469	796	ENSG00000169718.18	DUS1L	chr17	-	82061556	82061721	82061617	82061721	82061208	82061353	0.0821372	0.497369	0.0,0.151	0.092,0.198
3464	ENSG00000167747.15	C19orf48	chr19	-	50799271	50799357	50798703	50798958	50802216	50802249	235	0.000361712	0.020998	1.0,1.0	0.559,0.597	0.422		5660	ENSG00000185000.12	DGAT1	chr8	-	144317021	144317252	144317021	144317109	144317186	144317252	226	0.0157337	0.141513	0.414,0.324	0.622,0.594	-0.239	7891	ENSG00000224078.15	SNHG14	chr15	+	25053827	25054866	25053827	25053967	25055073	25055230	0.0820383	0.497369	0.758,0.84	0.587,0.63
26040	ENSG00000116852.15	KIF21B	chr1	-	201004540	201004933	201004339	201004455	201005307	201005442	542	0.000363627	0.0210689	0.478,0.712	1.0,1.0	-0.405		1253	ENSG00000091640.8	SPAG7	chr17	-	4959225	4959916	4959225	4959643	4959759	4959916	265	0.0160676	0.143694	0.158,0.024	0.018,0.0	0.082	770	ENSG00000100209.11	HSCB	chr22	+	28744614	28744709	28744614	28744704	28745863	28746008	0.0832246	0.502179	0.492,0.0	0.244,0.326
52883	ENSG00000077782.22	FGFR1	chr8	-	38429246	38429390	38428345	38428435	38457355	38457446	293	0.000366094	0.0211715	0.122,0.266	0.781,0.67	-0.532		4801	ENSG00000084623.12	EIF3I	chr1	+	32224409	32226530	32224409	32224475	32226170	32226530	1844	0.016057	0.143694	0.046,0.013	0.003,0.026	0.015	6633	ENSG00000198093.11	ZNF649	chr19	-	51899797	51900294	51900092	51900294	51896851	51896978	0.0832481	0.502179	0.309,0.0	0.251,0.0
53356	ENSG00000188738.15	FSIP2	chr2	+	185815370	185815471	185813544	185814042	185824433	185824480	250	0.000368623	0.0212773	0.23,0.373	0.827,1.0	-0.612		6097	ENSG00000106105.15	GARS1	chr7	+	30601058	30603122	30601058	30601200	30603033	30603122	1982	0.0160545	0.143694	0.014,0.02	0.025,0.036	-0.013	4942	ENSG00000135541.22	AHI1	chr6	-	135495312	135495898	135495813	135495898	135492227	135492291	0.0837899	0.504489	0.133,0.223	0.048,0.071
33737	ENSG00000036054.13	TBC1D23	chr3	+	100311832	100311877	100310402	100310542	100316098	100316187	194	0.000369789	0.0213042	0.277,0.434	1.0,0.793	-0.541		876	ENSG00000169718.18	DUS1L	chr17	-	82061208	82061721	82061208	82061353	82061556	82061721	352	0.0161169	0.143861	1.0,0.772	1.0,0.261	0.255	6626	ENSG00000078114.19	NEBL	chr10	-	20818703	20819516	20819423	20819516	20817599	20817692	0.0843811	0.507086	0.673,0.607	1.0,1.0
61233	ENSG00000166352.18	IFTAP	chr11	+	36636050	36636117	36633283	36633438	36648015	36648155	216	0.000375977	0.0216197	0.674,0.187	0.805,1.0	-0.472		1466	ENSG00000188603.22	CLN3	chr16	-	28491481	28491835	28491481	28491560	28491713	28491835	302	0.0162143	0.144457	0.18,0.198	0.747,0.425	-0.397	6677	ENSG00000140332.17	TLE3	chr15	-	70058158	70058291	70058185	70058291	70057458	70057658	0.0852151	0.511129	0.982,0.9	0.888,0.873
6014	ENSG00000176155.19	CCDC57	chr17	-	82108767	82108954	82101751	82101866	82127691	82127818	336	0.000379916	0.0216417	0.129,0.073	0.0,0.0	0.101		4609	ENSG00000169242.12	EFNA1	chr1	+	155133502	155133780	155133502	155133568	155133729	155133780	310	0.0162463	0.14447	0.224,1.0	0.0,1.0	0.112	475	ENSG00000126457.22	PRMT1	chr19	+	49680139	49680253	49680139	49680238	49680486	49680588	0.0861959	0.515799	0.833,0.515	1.0,0.694
6398	ENSG00000161513.12	FDXR	chr17	-	74864479	74864564	74863895	74864347	74864823	74864931	234	0.000378999	0.0216417	1.0,1.0	0.741,0.778	0.24		2358	ENSG00000090621.15	PABPC4	chr1	-	39562322	39564773	39562322	39564542	39564685	39564773	292	0.01631	0.144491	0.197,0.035	0.277,0.338	-0.192	7407	ENSG00000161217.12	PCYT1A	chr3	-	196287531	196287726	196287614	196287726	196270414	196270541	0.0863188	0.515799	0.0,0.491	0.0,0.0
23616	ENSG00000133226.17	SRRM1	chr1	+	24647078	24647208	24646666	24646789	24648858	24649029	279	0.000379612	0.0216417	0.243,0.135	0.052,0.064	0.131		6244	ENSG00000008311.16	AASS	chr7	-	122078861	122079712	122078861	122078950	122079596	122079712	795	0.0163037	0.144491	0.294,0.304	0.515,0.797	-0.357	422	ENSG00000198131.14	ZNF544	chr19	+	58230393	58230497	58230393	58230462	58243964	58244056	0.086537	0.516132	0.0,0.0	0.548,0.0
55849	ENSG00000122707.12	RECK	chr9	+	36066768	36066870	36065576	36065624	36080604	36080638	251	0.000379432	0.0216417	0.051,0.229	0.0,0.0	0.14		903	ENSG00000225663.8	MCRIP1	chr17	-	81822360	81823311	81822360	81822907	81823208	81823311	450	0.0163556	0.144623	0.728,0.742	0.61,0.619	0.12	1494	ENSG00000137876.11	RSL24D1	chr15	-	55192402	55192833	55192719	55192833	55190974	55191047	0.0868966	0.516335	0.044,0.009	0.017,0.009
63488	ENSG00000082805.20	ERC1	chr12	+	1410388	1410453	1408148	1408247	1444561	1444589	214	0.000378546	0.0216417	0.676,1.0	0.0,0.41	0.633		6708	ENSG00000167700.9	MFSD3	chr8	+	144510597	144510903	144510597	144510722	144510793	144510903	220	0.016395	0.144699	0.101,0.0	0.184,0.351	-0.217	6280	ENSG00000078674.18	PCM1	chr8	+	17991541	17991700	17991541	17991676	17993482	17993619	0.0868782	0.516335	0.581,0.562	0.529,0.415
39443	ENSG00000139496.16	NUP58	chr13	+	25309246	25309282	25307805	25307948	25312882	25312956	185	0.000380911	0.0216578	0.973,0.985	0.849,0.933	0.088		1456	ENSG00000168488.19	ATXN2L	chr16	+	28835932	28837237	28835932	28836122	28836750	28837237	777	0.0164613	0.145013	0.769,0.892	0.9,1.0	-0.119	432	ENSG00000063244.13	U2AF2	chr19	+	55669082	55669181	55669082	55669169	55669443	55669692	0.0871325	0.516769	0.261,0.39	0.236,0.176
18541	ENSG00000131373.15	HACL1	chr3	-	15586524	15586602	15582876	15582989	15589539	15589612	227	0.000382103	0.021685	0.304,0.686	1.0,0.821	-0.415		395	ENSG00000101384.12	JAG1	chr20	-	10648548	10649107	10648548	10648676	10649060	10649107	533	0.0166411	0.145677	1.0,0.921	0.755,0.955	0.106	1659	ENSG00000204371.11	EHMT2	chr6	-	31884890	31885016	31884911	31885016	31884644	31884799	0.0873134	0.516876	0.055,0.018	0.023,0.135
49461	ENSG00000106603.20	COA1	chr7	-	43656032	43656153	43648599	43648652	43729428	43729505	270	0.000383634	0.021691	0.0,0.0	0.424,0.099	-0.262		2255	ENSG00000197603.16	CPLANE1	chr5	-	37121616	37122488	37121616	37121784	37122429	37122488	794	0.0165774	0.145677	0.158,0.039	0.03,0.066	0.051	6675	ENSG00000140332.17	TLE3	chr15	-	70058149	70058291	70058158	70058291	70057458	70057658	0.0882201	0.52127	0.163,0.202	0.35,0.23
52109	ENSG00000146918.20	NCAPG2	chr7	-	158652292	158652480	158646459	158646563	158654594	158654694	337	0.000383237	0.021691	0.653,0.861	1.0,1.0	-0.243		2409	ENSG00000113013.16	HSPA9	chr5	-	138553755	138556592	138553755	138556114	138556451	138556592	486	0.0166183	0.145677	0.047,0.032	0.028,0.0	0.026	251	ENSG00000182093.16	GET1	chr21	+	39390697	39390919	39390697	39390863	39391768	39391836	0.0888043	0.523747	0.009,0.024	0.054,0.032
34358	ENSG00000172456.18	FGGY	chr1	+	59638227	59638375	59625987	59626049	59660218	59660293	297	0.000387177	0.0218507	1.0,1.0	0.648,0.801	0.275		4275	ENSG00000114388.14	NPRL2	chr3	-	50349664	50350022	50349664	50349828	50349930	50350022	251	0.0167221	0.145677	0.337,0.182	0.597,0.64	-0.359	5987	ENSG00000104763.20	ASAH1	chr8	-	18084461	18084998	18084675	18084998	18075540	18075587	0.0891262	0.52467	0.468,0.354	0.451,0.138
63618	ENSG00000111667.14	USP5	chr12	+	6858423	6858617	6857400	6857723	6859469	6859541	343	0.000391247	0.0220395	1.0,1.0	0.819,0.854	0.163		8057	ENSG00000129933.21	MAU2	chr19	+	19344848	19345369	19344848	19344926	19345303	19345369	526	0.0166708	0.145677	0.221,0.269	0.429,0.325	-0.132	2390	ENSG00000242086.8	MUC20-OT1	chr3	+	195708428	195708555	195708428	195708435	195708746	195708841	0.0896705	0.526897	0.825,1.0	1.0,0.217
46559	ENSG00000123983.15	ACSL3	chr2	+	222927016	222927242	222924455	222924595	222928861	222928936	375	0.000396408	0.022289	1.0,1.0	0.901,0.866	0.117		8239	ENSG00000172262.12	ZNF131	chr5	+	43161248	43161931	43161248	43161606	43161708	43161931	251	0.0167106	0.145677	0.298,0.328	0.82,0.451	-0.322	5986	ENSG00000104763.20	ASAH1	chr8	-	18084286	18084971	18084675	18084971	18075540	18075587	0.0899021	0.527282	0.372,0.316	0.356,0.145
26993	ENSG00000093000.19	NUP50	chr22	+	45170987	45171152	45168167	45168246	45171599	45171639	314	0.000403434	0.022559	0.322,0.119	0.0,0.0	0.221		1510	ENSG00000168096.15	ANKS3	chr16	-	4701433	4702242	4701433	4701543	4702101	4702242	707	0.0170833	0.147268	0.322,1.0	0.733,1.0	-0.206	1052	ENSG00000175061.18	SNHG29	chr17	+	16439326	16439703	16439326	16439414	16440184	16440253	0.0907287	0.531148	0.237,0.172	0.143,0.184
30380	ENSG00000288558.2	DUS4L-BCAP29	chr7	+	107573703	107573821	107571144	107571266	107575187	107575310	267	0.000403163	0.022559	0.626,0.527	1.0,1.0	-0.423		2516	ENSG00000132463.14	GRSF1	chr4	-	70825295	70826245	70825295	70825431	70826123	70826245	841	0.0171083	0.147268	0.056,0.048	0.079,0.084	-0.029	7684	ENSG00000272168.8	CASC15	chr6	+	22110746	22110920	22110746	22110818	22191566	22191656	0.091057	0.532088	0.862,0.629	1.0,0.773
48856	ENSG00000005801.18	ZNF195	chr11	-	3377616	3377802	3373576	3373656	3379037	3379100	335	0.000402359	0.022559	0.471,0.471	1.0,1.0	-0.529		2731	ENSG00000137267.7	TUBB2A	chr6	-	3153698	3156152	3153698	3155735	3156043	3156152	457	0.0170959	0.147268	0.131,0.114	0.179,0.395	-0.165	4013	ENSG00000117480.16	FAAH	chr1	+	46405587	46406078	46405587	46405794	46406243	46406368	0.0918669	0.533871	0.734,1.0	1.0,0.147
43581	ENSG00000071462.12	BUD23	chr7	+	73693991	73694050	73693623	73693669	73697604	73697694	208	0.000408107	0.0227784	0.573,1.0	1.0,1.0	-0.214		4785	ENSG00000135486.19	HNRNPA1	chr12	+	54281385	54281941	54281385	54281502	54281794	54281941	441	0.0170239	0.147268	0.019,0.036	0.043,0.039	-0.013	6716	ENSG00000155256.18	ZFYVE27	chr10	+	97737127	97737325	97737127	97737321	97738476	97738674	0.0915879	0.533871	0.14,0.15	0.0,0.085
66644	ENSG00000120697.10	ALG5	chr13	-	36994988	36995035	36993603	36993672	36995424	36995596	196	0.000412314	0.022971	0.363,0.884	1.0,1.0	-0.377		6190	ENSG00000105821.15	DNAJC2	chr7	-	103322510	103322794	103322510	103322632	103322702	103322794	219	0.0171234	0.147268	0.505,0.254	1.0,0.671	-0.456	7447	ENSG00000054654.19	SYNE2	chr14	+	63997300	63997576	63997300	63997391	63998218	63998328	0.0917436	0.533871	0.0,0.097	0.0,0.029
24965	ENSG00000078687.17	TNRC6C	chr17	+	78077160	78077334	78075135	78075278	78079394	78079541	323	0.000415538	0.0230902	0.893,0.559	1.0,1.0	-0.274		6759	ENSG00000100918.13	REC8	chr14	+	24178605	24178916	24178605	24178672	24178776	24178916	253	0.0170211	0.147268	0.243,0.329	0.0,0.227	0.173	4776	ENSG00000226383.7	LINC01876	chr2	-	156024469	156024576	156024484	156024576	156022671	156022817	0.0921758	0.533954	0.732,0.0	0.602,1.0
25353	ENSG00000143742.14	SRP9	chr1	+	225786861	225786985	225783299	225783368	225787970	225788266	273	0.000415971	0.0230902	0.686,0.831	1.0,1.0	-0.242		8250	ENSG00000133706.19	LARS1	chr5	-	146130017	146133081	146130017	146131109	146132897	146133081	1937	0.0169873	0.147268	0.063,0.038	0.037,0.022	0.021	6343	ENSG00000276291.5	FRG1HP	chr9	+	40992260	40992775	40992260	40992479	40993252	40993434	0.0922177	0.533954	1.0,0.295	0.251,0.143
657	ENSG00000235437.8	LINC01278	chrX	-	63509943	63510079	63432363	63432491	63560831	63560948	285	0.000417163	0.0231142	0.08,0.069	0.386,0.511	-0.374		19	ENSG00000196924.19	FLNA	chrX	-	154350030	154351696	154350030	154350207	154350908	154351696	850	0.0173388	0.148849	0.065,0.047	0.089,0.064	-0.02	3693	ENSG00000059145.19	UNKL	chr16	-	1369933	1370357	1370129	1370357	1367655	1367858	0.0928416	0.536587	0.0,0.0	1.0,0.0
4476	ENSG00000169169.15	CPT1C	chr19	+	49691660	49691770	49691111	49691340	49692238	49692393	259	0.000420738	0.0232699	0.697,1.0	0.365,0.0	0.666		6531	ENSG00000168818.10	STX18	chr4	-	4418967	4420944	4418967	4420129	4420863	4420944	883	0.0173769	0.148904	0.111,0.155	0.3,0.205	-0.119	2097	ENSG00000177084.18	POLE	chr12	-	132641017	132641851	132641646	132641851	132639124	132639298	0.0935157	0.537847	0.067,0.056	0.069,0.112
54787	ENSG00000169398.19	PTK2	chr8	-	140686631	140686694	140675429	140675499	140700890	140701022	212	0.000423057	0.0233557	0.621,0.808	1.0,0.923	-0.247		137	ENSG00000215301.11	DDX3X	chrX	+	41347311	41349886	41347311	41347451	41347639	41349886	337	0.0174755	0.149477	0.107,0.031	0.153,0.149	-0.082	3038	ENSG00000204564.12	C6orf136	chr6	+	30650993	30651100	30650993	30651082	30651265	30651466	0.0937375	0.537847	0.0,0.1	0.095,0.199
42993	ENSG00000071054.16	MAP4K4	chr2	+	101868028	101868037	101867211	101867309	101869621	101869797	158	0.000429324	0.0236587	0.91,0.897	1.0,1.0	-0.097		6215	ENSG00000007372.24	PAX6	chr11	-	31790709	31793553	31790709	31790860	31793437	31793553	2726	0.0175297	0.14967	0.026,0.025	0.016,0.016	0.01	3700	ENSG00000153558.16	FBXL2	chr3	+	33378684	33378834	33378684	33378741	33383988	33384201	0.093733	0.537847	0.101,0.081	0.435,0.133
55343	ENSG00000153707.18	PTPRD	chr9	-	8437197	8437239	8436591	8436689	8438700	8438820	191	0.000430931	0.0236616	0.438,0.565	1.0,1.0	-0.499		1438	ENSG00000103502.14	CDIPT	chr16	-	29862585	29862869	29862585	29862720	29862814	29862869	243	0.0176945	0.150531	0.062,0.0	0.096,0.086	-0.06	6371	ENSG00000160256.13	FAM207A	chr21	+	44943683	44943837	44943683	44943792	44960099	44960168	0.0937306	0.537847	1.0,0.697	0.606,0.434
62206	ENSG00000149716.13	LTO1	chr11	-	69674550	69674766	69673215	69673321	69675189	69675305	365	0.000430753	0.0236616	0.0,0.449	1.0,0.449	-0.5		8048	ENSG00000111011.18	RSRC2	chr12	-	122518838	122521428	122518838	122519029	122521384	122521428	2504	0.0176927	0.150531	1.0,0.887	0.756,0.895	0.118	269	ENSG00000159086.15	PAXBP1	chr21	-	32755212	32755353	32755229	32755353	32751118	32751218	0.0943735	0.538246	0.832,0.672	0.595,0.608
59522	ENSG00000147044.23	CASK	chrX	-	41557031	41557100	41555599	41555635	41559778	41559847	218	0.000434202	0.0237982	0.74,0.655	0.949,0.921	-0.238		880	ENSG00000169738.8	DCXR	chr17	-	82036190	82036643	82036190	82036308	82036543	82036643	384	0.0179284	0.151972	1.0,0.636	0.895,1.0	-0.129	2664	ENSG00000244026.6	FAM86DP	chr3	-	75434724	75435048	75434917	75435048	75432807	75432870	0.0941886	0.538246	0.0,0.0	0.179,1.0
47812	ENSG00000145730.21	PAM	chr5	+	103025133	103025334	103019789	103019843	103028181	103028238	350	0.000441304	0.024144	0.92,0.63	1.0,0.934	-0.192		5112	ENSG00000234741.8	GAS5	chr1	-	173864483	173864704	173864483	173864506	173864674	173864704	317	0.0179277	0.151972	0.185,0.167	0.245,0.252	-0.073	4315	ENSG00000143774.17	GUK1	chr1	+	228141123	228141507	228141123	228141288	228145510	228145624	0.0944699	0.538246	1.0,0.179	0.0,0.168
46588	ENSG00000233184.7	RP11-421L21.3	chr1	+	101080388	101080613	101077362	101077508	101083460	101083483	374	0.000442442	0.0241628	1.0,1.0	1.0,0.21	0.395		1558	ENSG00000103249.18	CLCN7	chr16	-	1449275	1450666	1449275	1449327	1450496	1450666	1318	0.0179833	0.152164	1.0,0.753	0.739,0.604	0.205	6905	ENSG00000086758.16	HUWE1	chrX	-	53602563	53602658	53602590	53602658	53600117	53600309	0.0944857	0.538246	0.895,0.945	0.963,0.95
58254	ENSG00000273032.3	DGCR5	chr22	+	18985835	18986019	18970483	18970658	18987756	18987900	333	0.000447251	0.0243816	0.472,0.472	1.0,1.0	-0.528		881	ENSG00000169738.8	DCXR	chr17	-	82036190	82036643	82036190	82036448	82036543	82036643	244	0.0182886	0.154069	0.07,0.108	0.153,0.159	-0.067	728	ENSG00000172175.15	MALT1	chr18	+	58734306	58734566	58734306	58734381	58735201	58735329	0.0949251	0.53978	0.064,0.196	0.308,0.308
10895	ENSG00000178802.18	MPI	chr15	+	74890437	74890654	74890041	74890089	74891378	74891579	366	0.000448236	0.0243916	0.588,0.588	1.0,1.0	-0.412		2872	ENSG00000173846.13	PLK3	chr1	+	44804338	44804779	44804338	44804501	44804649	44804779	297	0.0183392	0.154069	0.177,0.201	0.556,0.354	-0.266	1771	ENSG00000226950.8	DANCR	chr4	+	52713493	52713702	52713493	52713542	52714198	52714238	0.0955189	0.540852	1.0,0.952	0.932,0.956
50544	ENSG00000127980.16	PEX1	chr7	-	92509328	92509411	92506993	92507126	92510943	92511047	232	0.000451015	0.0244989	0.658,0.194	0.893,0.911	-0.476		5117	ENSG00000234741.8	GAS5	chr1	-	173866527	173866796	173866527	173866567	173866760	173866796	342	0.0182512	0.154069	0.341,0.189	0.486,0.362	-0.159	2389	ENSG00000242086.8	MUC20-OT1	chr3	+	195708153	195708513	195708153	195708435	195708746	195708841	0.095625	0.540852	0.831,1.0	1.0,0.247
6758	ENSG00000108395.14	TRIM37	chr17	-	59001597	59001741	58999380	58999459	59012327	59012446	293	0.000452829	0.02451	0.433,0.337	1.0,1.0	-0.615		6964	ENSG00000263753.8	LINC00667	chr18	+	5238080	5241889	5238080	5239196	5241698	5241889	2651	0.0183096	0.154069	1.0,1.0	1.0,0.732	0.134	6123	ENSG00000109686.19	SH3D19	chr4	-	151176524	151176687	151176533	151176687	151174669	151175674	0.0954705	0.540852	0.047,0.185	0.092,0.0
60780	ENSG00000072952.20	IRAG1	chr11	-	10652024	10652182	10633967	10634071	10690264	10690369	307	0.00045217	0.02451	0.421,0.493	1.0,1.0	-0.543		458	ENSG00000170889.14	RPS9	chr19	+	54206552	54207647	54206552	54206724	54207397	54207647	822	0.0185615	0.155659	0.096,0.19	0.046,0.079	0.081	3043	ENSG00000184277.13	TM2D3	chr15	-	101651695	101652391	101652270	101652391	101650003	101650161	0.0959686	0.54183	0.531,0.59	1.0,0.61
16223	ENSG00000198825.15	INPP5F	chr10	+	119781060	119781242	119751075	119751156	119781634	119781771	331	0.000458356	0.0247212	0.231,0.31	0.0,0.029	0.256		1252	ENSG00000196562.14	SULF2	chr20	-	47659398	47659730	47659398	47659452	47659696	47659730	393	0.01871	0.156348	0.079,0.101	0.13,0.256	-0.103	5818	ENSG00000007372.24	PAX6	chr11	-	31801229	31801776	31801560	31801776	31800690	31800856	0.0966337	0.544616	0.318,0.237	0.583,0.468
21463	ENSG00000173846.13	PLK3	chr1	+	44804649	44804779	44804338	44804501	44805265	44805379	279	0.000457815	0.0247212	0.882,0.616	1.0,1.0	-0.251		2075	ENSG00000196839.13	ADA	chr20	-	44622828	44623078	44622828	44622930	44623006	44623078	225	0.0187054	0.156348	0.0,0.107	0.153,0.203	-0.124	4509	ENSG00000157184.7	CPT2	chr1	+	53210014	53211369	53210014	53211319	53213263	53214170	0.0970784	0.546152	0.2,0.158	0.0,0.0
7641	ENSG00000141298.19	SSH2	chr17	-	29848848	29848929	29793615	29793937	29929937	29930167	230	0.000461595	0.0248518	0.065,0.17	0.0,0.0	0.118		1133	ENSG00000007202.15	KIAA0100	chr17	-	28639574	28640025	28639574	28639642	28639900	28640025	407	0.0188656	0.157369	0.186,0.093	0.278,0.236	-0.117	1263	ENSG00000101928.13	MOSPD1	chrX	-	134896813	134897034	134896816	134897034	134891478	134891640	0.0985821	0.549738	0.246,0.164	0.0,0.0
51345	ENSG00000128513.16	POT1	chr7	-	124829253	124829342	124827200	124827305	124835278	124835414	238	0.000464819	0.0249811	0.862,1.0	0.662,0.862	0.169		3149	ENSG00000117266.16	CDK18	chr1	+	205529520	205530349	205529520	205529563	205530258	205530349	844	0.0190565	0.157844	0.277,0.191	0.261,1.0	-0.397	2955	ENSG00000155506.18	LARP1	chr5	+	154793799	154794000	154793799	154793922	154794099	154794262	0.0984453	0.549738	0.84,0.913	0.429,0.943
42206	ENSG00000175324.10	LSM1	chr8	-	38169801	38169917	38163338	38163840	38171964	38172033	265	0.000467963	0.0251058	1.0,1.0	0.785,0.813	0.201		3703	ENSG00000090861.17	AARS1	chr16	-	70253267	70253800	70253267	70253381	70253713	70253800	481	0.0189583	0.157844	0.024,0.088	0.037,0.0	0.037	5442	ENSG00000111961.18	SASH1	chr6	+	148519546	148520382	148519546	148519893	148525290	148525365	0.0980132	0.549738	0.428,0.214	0.097,0.243
41738	ENSG00000196233.14	LCOR	chr10	+	96944112	96944245	96907667	96907747	96952102	96952196	282	0.000469741	0.0251568	0.514,0.26	0.679,1.0	-0.453		4146	ENSG00000069399.15	BCL3	chr19	+	44758245	44758841	44758245	44758413	44758723	44758841	459	0.019036	0.157844	0.289,0.294	0.056,0.196	0.165	5595	ENSG00000139350.12	NEDD1	chr12	+	96907603	96907856	96907603	96907624	96919984	96920125	0.0984769	0.549738	0.758,1.0	1.0,0.904
353	ENSG00000077264.16	PAK3	chrX	+	111097574	111097684	110944284	110944628	111103158	111103306	259	0.000471969	0.0252317	1.0,0.365	0.365,0.0	0.5		7766	ENSG00000132507.18	EIF5A	chr17	+	7311349	7311651	7311349	7311481	7311577	7311651	245	0.0190378	0.157844	0.047,0.087	0.116,0.107	-0.044	6756	ENSG00000187391.22	MAGI2	chr7	-	78194873	78195063	78194879	78195063	78178010	78178102	0.0981396	0.549738	0.926,0.871	0.794,0.743
67496	ENSG00000068650.19	ATP11A	chr13	+	112880545	112880649	112875775	112875941	112881815	112887168	253	0.000473964	0.0252939	0.0,0.0	0.371,1.0	-0.685		4960	ENSG00000100023.20	PPIL2	chr22	+	21694592	21694817	21694592	21694665	21694754	21694817	238	0.0191525	0.158361	0.238,0.2	0.401,0.461	-0.212	6570	ENSG00000225383.8	SFTA1P	chr10	-	10794697	10794980	10794838	10794980	10792371	10792525	0.098943	0.550783	0.507,0.643	0.562,1.0
61678	ENSG00000162148.11	PPP1R32	chr11	+	61486343	61486403	61485798	61485911	61486523	61486610	209	0.000475449	0.0253287	0.416,0.641	1.0,1.0	-0.472		190	ENSG00000239900.14	ADSL	chr22	+	40349831	40353117	40349831	40350035	40353072	40353117	3186	0.0192683	0.159039	0.008,0.012	0.017,0.016	-0.007	353	ENSG00000196756.13	SNHG17	chr20	-	38425934	38426503	38426418	38426503	38422091	38422241	0.0993495	0.552077	0.32,0.191	1.0,0.37
56762	ENSG00000198836.11	OPA1	chr3	+	193617783	193617837	193615673	193615770	193618868	193618936	203	0.000477239	0.0253796	0.329,0.268	0.595,1.0	-0.499		7018	ENSG00000054148.18	PHPT1	chr9	+	136850012	136850560	136850012	136850137	136850502	136850560	514	0.0193502	0.159436	0.929,0.829	1.0,1.0	-0.121	234	ENSG00000186866.17	POFUT2	chr21	-	45283351	45283527	45283382	45283527	45282348	45282459	0.099622	0.552623	0.249,0.0	0.554,0.084
8014	ENSG00000175106.17	TVP23C	chr17	-	15553684	15553829	15547058	15547148	15555281	15555359	294	0.000480092	0.0254868	0.67,0.767	1.0,1.0	-0.281		5402	ENSG00000163161.14	ERCC3	chr2	-	127289336	127289824	127289336	127289519	127289688	127289824	318	0.019683	0.161895	0.849,1.0	0.748,0.814	0.144	1910	ENSG00000126091.21	ST3GAL3	chr1	+	43899167	43899289	43899167	43899263	43899540	43899727	0.100526	0.556663	1.0,0.0	0.63,0.221
19331	ENSG00000188501.11	LCTL	chr15	-	66551661	66551861	66550040	66550104	66552042	66552169	349	0.000482602	0.0255754	1.0,1.0	0.299,0.701	0.5		4584	ENSG00000168291.13	PDHB	chr3	-	58429707	58430238	58429707	58429941	58430127	58430238	335	0.0199394	0.163719	0.727,1.0	0.55,1.0	0.088	5534	ENSG00000153253.19	SCN3A	chr2	-	165140650	165140998	165140701	165140998	165139475	165139608	0.1016	0.561634	0.0,1.0	0.598,0.817
22761	ENSG00000118454.13	ANKRD13C	chr1	-	70270855	70270956	70258998	70262847	70274719	70274818	250	0.000484641	0.0255943	0.899,0.781	1.0,0.962	-0.141		378	ENSG00000131051.24	RBM39	chr20	-	35704667	35705330	35704667	35704746	35705224	35705330	627	0.0199897	0.163846	0.022,0.017	0.028,0.034	-0.011	7228	ENSG00000111667.14	USP5	chr12	+	6863185	6863377	6863185	6863308	6863829	6863973	0.101826	0.5619	0.208,0.175	0.332,0.255
59614	ENSG00000095637.23	SORBS1	chr10	-	95434621	95434717	95432447	95432576	95437489	95437555	245	0.000483992	0.0255943	0.169,0.123	0.448,0.593	-0.374		1405	ENSG00000169733.12	RFNG	chr17	-	82050661	82051342	82050661	82050764	82051011	82051342	396	0.0200528	0.164078	1.0,0.904	0.664,1.0	0.12	4494	ENSG00000075702.19	WDR62	chr19	+	36101213	36102151	36101213	36101317	36102736	36102851	0.102113	0.56251	0.685,1.0	1.0,1.0
31247	ENSG00000049246.15	PER3	chr1	+	7786720	7786836	7785440	7785586	7788044	7788246	265	0.000490456	0.0258356	0.529,0.628	1.0,1.0	-0.421		7666	ENSG00000002016.18	RAD52	chr12	-	916343	916820	916343	916535	916638	916820	252	0.0204141	0.166745	1.0,1.0	0.0,1.0	0.5	890	ENSG00000108387.16	SEPTIN4	chr17	-	58526681	58526978	58526931	58526978	58526219	58526313	0.102847	0.565567	0.857,1.0	1.0,0.157
68417	ENSG00000100307.13	CBX7	chr22	-	39134400	39134752	39130771	39134048	39138635	39138702	501	0.00049091	0.0258356	0.717,0.308	1.0,1.0	-0.488		7798	ENSG00000123349.15	PFDN5	chr12	+	53295838	53297924	53295838	53295941	53297849	53297924	2057	0.0205019	0.167172	1.0,0.42	1.0,1.0	-0.29	1386	ENSG00000103245.14	CIAO3	chr16	-	739539	739738	739642	739738	737185	737329	0.103335	0.567269	0.0,0.0	0.154,0.0
67873	ENSG00000136367.14	ZFHX2	chr14	-	23529709	23529768	23527603	23527804	23531480	23531721	208	0.000492882	0.0258946	1.0,1.0	0.589,0.626	0.393		8055	ENSG00000136878.14	USP20	chr9	+	129880112	129881828	129880112	129880289	129880466	129881828	326	0.0205714	0.167449	1.0,0.314	0.478,0.0	0.418	1056	ENSG00000011295.16	TTC19	chr17	+	16000117	16000382	16000117	16000245	16001914	16002025	0.10379	0.567458	0.115,0.055	0.11,0.258
9976	ENSG00000067365.15	METTL22	chr16	+	8635038	8635079	8628729	8629110	8635167	8635282	190	0.000495206	0.0259271	0.511,0.136	0.0,0.0	0.324		309	ENSG00000203896.10	LIME1	chr20	+	63738007	63738499	63738007	63738060	63738182	63738499	271	0.0208362	0.169312	0.305,0.026	0.268,0.333	-0.135	1420	ENSG00000255571.9	MIR9-3HG	chr15	+	89388503	89388746	89388503	89388581	89389344	89389482	0.104381	0.567458	0.249,0.16	0.091,0.147
25576	ENSG00000160766.14	GBAP1	chr1	-	155218387	155218479	155217239	155218049	155218847	155218943	241	0.000495017	0.0259271	1.0,1.0	0.607,0.607	0.393		1346	ENSG00000124067.17	SLC12A4	chr16	-	67950961	67951304	67950961	67951060	67951139	67951304	228	0.0210142	0.170464	0.335,0.214	0.052,0.179	0.159	1970	ENSG00000103723.17	AP3B2	chr15	-	82688735	82689232	82689157	82689232	82681419	82681580	0.103832	0.567458	0.742,1.0	1.0,0.566
20670	ENSG00000124212.6	PTGIS	chr20	-	49547840	49548019	49544304	49544448	49550065	49550189	328	0.000507259	0.0265126	0.803,0.82	1.0,1.0	-0.189		1066	ENSG00000131462.9	TUBG1	chr17	+	42613848	42614412	42613848	42613998	42614259	42614412	410	0.0211092	0.170501	0.0,0.023	0.038,0.04	-0.028	3039	ENSG00000152061.24	RABGAP1L	chr1	+	174219124	174219295	174219124	174219184	174220971	174221164	0.104442	0.567458	1.0,1.0	0.838,0.788
34092	ENSG00000070814.22	TCOF1	chr5	+	150391543	150391795	150389886	150390023	150391956	150394916	401	0.000512471	0.026739	1.0,0.817	0.671,0.455	0.345		2097	ENSG00000168036.18	CTNNB1	chr3	+	41233340	41233867	41233340	41233444	41233528	41233867	233	0.0212357	0.170501	0.06,0.0	0.074,0.109	-0.061	4208	ENSG00000084636.18	COL16A1	chr1	-	31656097	31656444	31656399	31656444	31655313	31655502	0.104026	0.567458	0.398,0.0	1.0,0.248
9218	ENSG00000172775.17	PSME3IP1	chr16	-	57174168	57174286	57173727	57173869	57185820	57186055	267	0.000518634	0.0269681	0.074,0.285	0.0,0.0	0.179		2894	ENSG00000108654.16	DDX5	chr17	-	64500548	64502069	64500548	64500773	64502009	64502069	1385	0.0211966	0.170501	0.158,0.142	0.221,0.169	-0.045	7366	ENSG00000092841.19	MYL6	chr12	+	56158683	56159730	56158683	56158711	56159974	56160148	0.104247	0.567458	0.911,0.927	0.96,0.964
46164	ENSG00000196428.12	TSC22D2	chr3	+	150438197	150438354	150423048	150423120	150457075	150457127	306	0.00051819	0.0269681	1.0,0.422	0.0,0.327	0.547		6021	ENSG00000087303.18	NID2	chr14	-	52005736	52006660	52005736	52005849	52006536	52006660	836	0.0212031	0.170501	0.308,0.517	0.16,0.211	0.227	2709	ENSG00000135709.13	KIAA0513	chr16	+	85027750	85027858	85027750	85027851	85066899	85067400	0.104703	0.567901	1.0,1.0	1.0,0.0
6835	ENSG00000008294.21	SPAG9	chr17	-	50975862	50975901	50974770	50974947	50977107	50977221	188	0.000520317	0.0270094	0.502,0.478	0.327,0.259	0.197		6307	ENSG00000142784.16	WDTC1	chr1	+	27303620	27305193	27303620	27303795	27305000	27305193	1354	0.021212	0.170501	0.172,0.194	0.425,0.278	-0.169	5173	ENSG00000035115.22	SH3YL1	chr2	-	230546	231191	231022	231191	229965	230044	0.10522	0.569733	0.213,0.0	0.193,0.488
4896	ENSG00000198453.13	ZNF568	chr19	+	36925199	36925258	36917578	36917648	36936745	36936872	208	0.000524839	0.0271528	1.0,0.589	0.417,0.264	0.454		8060	ENSG00000065000.19	AP3D1	chr19	-	2112859	2113413	2112859	2112931	2113335	2113413	553	0.0210833	0.170501	0.618,0.764	0.574,0.0	0.404	3773	ENSG00000116001.17	TIA1	chr2	-	70236072	70236175	70236078	70236175	70230755	70230854	0.105759	0.571606	0.011,0.006	0.023,0.028
62958	ENSG00000128536.16	CDHR3	chr7	+	106017845	106018072	106015926	106016025	106020372	106020544	376	0.000524865	0.0271528	0.442,0.0	1.0,1.0	-0.779		996	ENSG00000108387.16	SEPTIN4	chr17	-	58526219	58526978	58526219	58526313	58526931	58526978	767	0.021298	0.17071	0.7,1.0	1.0,0.089	0.305	5066	ENSG00000115170.16	ACVR1	chr2	-	157818268	157818559	157818384	157818559	157799426	157799500	0.106153	0.571606	0.273,0.062	0.074,0.045
50367	ENSG00000164659.15	ELAPOR2	chr7	-	86912071	86912171	86909811	86910001	86912940	86913065	249	0.000529845	0.0273639	1.0,1.0	0.749,0.374	0.439		5599	ENSG00000066322.15	ELOVL1	chr1	-	43364927	43365376	43364927	43365008	43365185	43365376	326	0.0214273	0.171301	0.0,0.077	0.762,0.061	-0.373	5113	ENSG00000115806.13	GORASP2	chr2	+	170948349	170948430	170948349	170948380	170949538	170949742	0.106131	0.571606	1.0,0.979	0.874,1.0
15713	ENSG00000139719.11	VPS33A	chr12	-	122244568	122244762	122239877	122239945	122249870	122250045	343	0.00053759	0.0277169	1.0,1.0	0.465,1.0	0.267		7157	ENSG00000119912.18	IDE	chr10	-	92507574	92508205	92507574	92507666	92508112	92508205	595	0.0214444	0.171301	1.0,0.5	0.135,0.375	0.495	6019	ENSG00000147535.17	PLPP5	chr8	-	38268822	38268990	38268881	38268990	38268370	38268461	0.106287	0.571606	0.264,0.17	0.417,0.417
7569	ENSG00000141314.13	RHBDL3	chr17	+	32305340	32305441	32294293	32294442	32316231	32316274	250	0.000540627	0.0278263	0.598,0.676	1.0,1.0	-0.363		5836	ENSG00000260565.7	ERVK13-1	chr16	-	2660361	2663407	2660361	2661381	2663083	2663407	1851	0.0215442	0.171807	0.877,0.812	1.0,0.794	-0.052	6341	ENSG00000106479.11	ZNF862	chr7	+	149838374	149838635	149838374	149838461	149844624	149844736	0.106687	0.572789	1.0,0.0	1.0,1.0
55282	ENSG00000138750.15	NUP54	chr4	-	76124648	76124756	76117663	76118194	76130655	76130701	257	0.000545982	0.0280544	0.944,1.0	0.706,0.903	0.167		721	ENSG00000142453.12	CARM1	chr19	+	10920833	10921127	10920833	10920946	10921049	10921127	252	0.0217265	0.171882	0.0,0.0	0.047,0.067	-0.057	418	ENSG00000125875.15	TBC1D20	chr20	-	440964	442043	441587	442043	440247	440389	0.107631	0.574936	0.095,0.162	0.062,0.04
10879	ENSG00000138621.12	PPCDC	chr15	+	75044385	75044514	75028248	75028453	75048552	75048721	278	0.00054925	0.0281567	0.573,0.652	1.0,1.0	-0.387		1127	ENSG00000198720.13	ANKRD13B	chr17	+	29613353	29614761	29613353	29613719	29614262	29614761	692	0.0216527	0.171882	0.884,0.772	1.0,0.91	-0.127	5965	ENSG00000175215.11	CTDSP2	chr12	-	57827533	57827590	57827551	57827590	57826345	57826402	0.107412	0.574936	0.292,0.271	0.308,0.801
49150	ENSG00000149548.15	CCDC15	chr11	+	124991460	124991583	124987126	124988134	124992579	124992687	272	0.000549823	0.0281567	0.354,0.687	1.0,1.0	-0.48		1280	ENSG00000074660.16	SCARF1	chr17	-	1639911	1640666	1639911	1640040	1640447	1640666	556	0.0217345	0.171882	0.349,0.349	1.0,0.349	-0.326	6022	ENSG00000077782.22	FGFR1	chr8	-	38424316	38424699	38424508	38424699	38421796	38421941	0.107608	0.574936	0.209,0.278	0.192,0.179
11312	ENSG00000137776.17	SLTM	chr15	-	58932355	58932443	58916573	58916999	58933403	58933449	237	0.000556186	0.0282862	1.0,1.0	0.0,0.386	0.807		1593	ENSG00000161996.19	WDR90	chr16	+	666454	666792	666454	666598	666672	666792	223	0.0217359	0.171882	0.0,0.348	0.143,0.0	0.102	6191	ENSG00000249859.12	PVT1	chr8	+	127795345	127796071	127795345	127796008	127890588	127890998	0.108014	0.576016	0.069,0.048	0.231,0.118
21403	ENSG00000113456.19	RAD1	chr5	-	34913469	34913578	34911553	34911812	34914694	34914961	258	0.000555743	0.0282862	0.536,0.591	0.822,1.0	-0.348		3698	ENSG00000145362.21	ANK2	chr4	+	113236986	113240583	113236986	113237172	113240484	113240583	3461	0.0216098	0.171882	0.193,0.073	0.227,0.306	-0.134	4595	ENSG00000135476.12	ESPL1	chr12	+	53268754	53268928	53268754	53268847	53269023	53270085	0.108447	0.576387	0.0,1.0	0.362,0.0
26994	ENSG00000093000.19	NUP50	chr22	+	45170987	45171177	45168165	45168246	45171599	45171683	339	0.000554809	0.0282862	0.305,0.112	0.0,0.0	0.208		5463	ENSG00000124006.15	OBSL1	chr2	-	219550728	219551798	219550728	219550842	219551528	219551798	835	0.022016	0.173805	0.459,1.0	1.0,0.641	-0.091	4608	ENSG00000179818.15	PCBP1-AS1	chr2	-	70083506	70083687	70083537	70083687	70059642	70059680	0.108292	0.576387	0.262,0.623	0.768,0.554
38829	ENSG00000111271.15	ACAD10	chr12	+	111749010	111749103	111748316	111748475	111753771	111753915	242	0.000557532	0.0282862	1.0,1.0	0.649,0.48	0.435		796	ENSG00000071564.17	TCF3	chr19	-	1615284	1615821	1615284	1615515	1615685	1615821	319	0.0222847	0.175632	0.483,0.737	1.0,0.584	-0.182	7047	ENSG00000097033.14	SH3GLB1	chr1	+	86728402	86728489	86728402	86728441	86730087	86730111	0.109219	0.579518	0.159,1.0	0.0,1.0
38845	ENSG00000176720.6	BOK	chr2	+	241570124	241570288	241562347	241562476	241572296	241574131	313	0.000557932	0.0282862	0.88,0.8	0.949,1.0	-0.134		5594	ENSG00000109323.11	MANBA	chr4	-	102664684	102669049	102664684	102664852	102668962	102669049	4259	0.0223795	0.175791	0.296,0.318	0.138,0.109	0.183	98	ENSG00000102317.18	RBM3	chrX	+	48575560	48576083	48575560	48575667	48576313	48576419	0.109938	0.581387	0.099,0.072	0.27,0.129
41222	ENSG00000138398.17	PPIG	chr2	+	169631598	169631647	169630849	169630987	169631765	169631933	198	0.000557179	0.0282862	0.017,0.023	0.136,0.109	-0.102		7072	ENSG00000082458.12	DLG3	chrX	+	70450168	70450783	70450168	70450305	70450638	70450783	482	0.0223715	0.175791	0.0,0.171	0.34,0.171	-0.17	2535	ENSG00000156983.17	BRPF1	chr3	+	9742024	9742171	9742024	9742153	9742943	9743253	0.109856	0.581387	0.572,0.113	0.082,0.229
47585	ENSG00000198945.8	L3MBTL3	chr6	+	130049755	130049830	130049281	130049393	130051248	130051408	224	0.000560854	0.028387	1.0,0.428	1.0,1.0	-0.286		1677	ENSG00000213614.11	HEXA	chr15	-	72353067	72355624	72353067	72353178	72353690	72355624	661	0.0224628	0.176152	0.06,0.098	0.021,0.05	0.043	7692	ENSG00000258466.5	RP11-1012A1.4	chr14	-	67690077	67690267	67690211	67690267	67685014	67685204	0.110176	0.581679	0.014,0.014	0.029,0.043
1634	ENSG00000235954.7	TTC28-AS1	chr22	+	27922017	27922178	27919425	27919545	27935150	27935230	310	0.00056229	0.0284125	1.0,1.0	0.49,0.194	0.658		6141	ENSG00000234545.8	FAM133B	chr7	-	92577654	92578182	92577654	92577717	92578149	92578182	581	0.0225528	0.176564	0.606,0.606	0.353,0.35	0.255	7241	ENSG00000111752.11	PHC1	chr12	+	8919755	8919917	8919755	8919866	8920984	8921065	0.111676	0.588618	0.028,0.026	0.019,0.009
10788	ENSG00000103876.14	FAH	chr15	+	80172161	80172248	80168263	80168316	80173013	80173144	236	0.000563643	0.0284336	0.387,0.0	1.0,0.654	-0.633		95	ENSG00000184205.14	TSPYL2	chrX	+	53084531	53084866	53084531	53084622	53084754	53084866	281	0.0226059	0.176686	0.292,0.034	0.895,0.228	-0.399	7410	ENSG00000257815.7	PRANCR	chr12	-	70243065	70243376	70243311	70243376	70242796	70242893	0.112194	0.590366	1.0,0.569	1.0,0.638
3381	ENSG00000170954.12	ZNF415	chr19	-	53116312	53116433	53107878	53109908	53122661	53122743	270	0.00056521	0.0284652	1.0,1.0	0.356,0.688	0.478		3613	ENSG00000116337.20	AMPD2	chr1	+	109626725	109627316	109626725	109626912	109627174	109627316	411	0.0226507	0.176743	0.124,0.199	0.405,0.282	-0.182	5985	ENSG00000104763.20	ASAH1	chr8	-	18083980	18084980	18084675	18084980	18075540	18075587	0.112899	0.593095	0.714,0.761	0.755,0.437
62228	ENSG00000097033.14	SH3GLB1	chr1	+	86730087	86730111	86728402	86728489	86734601	86734691	173	0.000566141	0.0284652	1.0,1.0	0.365,0.721	0.457		4972	ENSG00000142920.17	AZIN2	chr1	+	33117901	33120530	33117901	33118116	33120043	33120530	2076	0.022726	0.177037	0.47,0.334	0.223,0.118	0.232	2028	ENSG00000127445.14	PIN1	chr19	+	9849089	9849311	9849089	9849201	9849532	9849682	0.113499	0.595262	0.903,0.943	0.892,0.837
33039	ENSG00000118473.23	SGIP1	chr1	+	66694438	66694742	66690189	66690316	66695433	66695493	453	0.000568824	0.0285059	1.0,0.568	1.0,0.0	0.284		3664	ENSG00000064601.21	CTSA	chr20	+	45892724	45894741	45892724	45894072	45894649	45894741	726	0.0229706	0.178647	0.114,0.021	0.151,0.104	-0.06	7778	ENSG00000126773.13	PCNX4	chr14	+	60124217	60125251	60124217	60124310	60125636	60125823	0.114087	0.597355	0.95,0.965	0.981,1.0
47540	ENSG00000130396.21	AFDN	chr6	+	167913402	167913423	167911283	167911489	167914167	167914313	170	0.000568269	0.0285059	0.055,0.146	0.02,0.014	0.083		2156	ENSG00000255717.7	SNHG1	chr11	-	62855423	62855885	62855423	62855466	62855864	62855885	547	0.023178	0.179078	0.671,0.62	0.836,0.848	-0.197	6446	ENSG00000127314.18	RAP1B	chr12	+	68610928	68611052	68610928	68611043	68648698	68648781	0.114741	0.599793	1.0,0.485	0.739,0.0
34169	ENSG00000179406.8	LINC00174	chr7	-	66487948	66488038	66485094	66485153	66489937	66490059	239	0.000569782	0.0285069	0.466,0.466	1.0,0.757	-0.413		2582	ENSG00000169045.17	HNRNPH1	chr5	-	179616125	179617110	179616125	179616218	179616868	179617110	799	0.0231222	0.179078	0.205,0.163	0.274,0.269	-0.088	3624	ENSG00000242612.7	DECR2	chr16	+	410242	410404	410242	410367	410690	410784	0.115453	0.600544	0.0,0.211	0.186,0.179
31623	ENSG00000162599.17	NFIA	chr1	+	61426464	61426556	61406561	61406727	61455302	61455487	241	0.000571687	0.0285084	0.825,0.885	0.957,1.0	-0.123		3991	ENSG00000125124.14	BBS2	chr16	-	56498436	56502456	56498436	56501497	56502316	56502456	968	0.0230801	0.179078	0.151,0.271	0.175,0.046	0.101	5716	ENSG00000106211.10	HSPB1	chr7	+	76303801	76303888	76303801	76303865	76303983	76304292	0.115203	0.600544	0.054,0.036	0.018,0.032
36435	ENSG00000176142.13	TMEM39A	chr3	-	119458017	119458083	119452508	119452530	119461961	119462148	215	0.000571326	0.0285084	1.0,0.806	0.581,0.51	0.358		5566	ENSG00000111877.18	MCM9	chr6	-	118910596	118913420	118910596	118911769	118913294	118913420	1674	0.023169	0.179078	0.516,1.0	1.0,0.278	0.119	5907	ENSG00000283239.1	KBTBD11-OT1	chr8	+	1869193	1869316	1869193	1869250	1876570	1876734	0.115333	0.600544	0.09,0.032	0.09,0.0
8118	ENSG00000108961.14	RANGRF	chr17	+	8289502	8289588	8289257	8289414	8289812	8290087	235	0.000576007	0.02863	0.735,0.967	0.962,1.0	-0.13		806	ENSG00000099622.14	CIRBP	chr19	+	1271139	1271365	1271139	1271246	1271328	1271365	231	0.0232831	0.179596	0.205,0.0	0.166,0.392	-0.177	3657	ENSG00000197530.13	MIB2	chr1	+	1623388	1623699	1623388	1623482	1623773	1623945	0.117478	0.606108	1.0,0.721	0.685,0.62
8653	ENSG00000135698.10	MPHOSPH6	chr16	-	82164651	82164940	82164074	82164194	82170124	82170218	438	0.000575391	0.02863	0.17,1.0	0.0,0.0	0.585		538	ENSG00000142046.15	TMEM91	chr19	+	41382771	41384083	41382771	41382921	41383873	41384083	1101	0.0233418	0.179683	1.0,1.0	1.0,0.404	0.298	3869	ENSG00000116353.16	MECR	chr1	-	29220833	29220921	29220837	29220921	29216587	29216685	0.117349	0.606108	1.0,0.0	0.0,0.0
46742	ENSG00000137807.16	KIF23	chr15	+	69439903	69440077	69438247	69438405	69444789	69445041	323	0.000580055	0.0287842	1.0,1.0	0.717,0.806	0.238		1679	ENSG00000213614.11	HEXA	chr15	-	72353690	72355624	72353690	72353737	72355558	72355624	1970	0.0233706	0.179683	0.063,0.052	0.042,0.015	0.029	4429	ENSG00000084623.12	EIF3I	chr1	+	32224409	32226530	32224409	32224475	32228498	32228609	0.117206	0.606108	0.608,0.605	0.679,0.783
42117	ENSG00000164118.13	CEP44	chr4	+	174316529	174316567	174316165	174316290	174317334	174318665	187	0.000583266	0.0288494	0.0,0.443	1.0,1.0	-0.778		7527	ENSG00000167799.10	NUDT8	chr11	-	67627937	67628400	67627937	67628251	67628322	67628400	220	0.0234209	0.179777	0.273,0.242	0.119,0.078	0.159	5040	ENSG00000120458.13	MSANTD2	chr11	-	124779003	124779139	124779049	124779139	124774718	124774974	0.117245	0.606108	0.909,1.0	0.859,0.902
51195	ENSG00000148335.15	NTMT1	chr9	+	129632649	129632865	129626162	129626295	129634053	129634221	365	0.000583104	0.0288494	0.648,0.718	1.0,0.88	-0.257		2910	ENSG00000163378.14	EOGT	chr3	-	68988505	68989017	68988505	68988577	68988924	68989017	496	0.0235258	0.180288	0.218,0.375	0.091,0.12	0.191	5715	ENSG00000106211.10	HSPB1	chr7	+	76303801	76303882	76303801	76303865	76303983	76304292	0.11682	0.606108	0.056,0.037	0.018,0.033
46332	ENSG00000000457.14	SCYL3	chr1	-	169864368	169864508	169862612	169862797	169866895	169866973	289	0.000592408	0.029254	0.607,1.0	0.34,0.474	0.396		2153	ENSG00000255717.7	SNHG1	chr11	-	62854518	62855216	62854518	62854551	62855132	62855216	730	0.0237212	0.18149	0.538,0.598	0.643,1.0	-0.253	1317	ENSG00000038532.16	CLEC16A	chr16	+	11003073	11003305	11003073	11003257	11020192	11020325	0.118094	0.608302	0.431,0.0	0.0,0.0
47086	ENSG00000070269.14	TMEM260	chr14	+	56603814	56603992	56585692	56585912	56605569	56605683	327	0.000600561	0.0295606	0.879,0.845	0.439,0.506	0.389		7069	ENSG00000149480.7	MTA2	chr11	-	62597315	62597712	62597315	62597415	62597609	62597712	343	0.023772	0.181584	0.05,0.1	0.056,0.012	0.041	5041	ENSG00000196576.16	PLXNB2	chr22	-	50294718	50294778	50294725	50294778	50289516	50290597	0.118315	0.608449	0.896,0.489	1.0,0.589
51065	ENSG00000177683.14	THAP5	chr7	-	108565829	108566022	108562131	108565105	108569098	108569453	342	0.000600221	0.0295606	0.805,0.694	1.0,0.927	-0.214		824	ENSG00000129951.19	PLPPR3	chr19	-	821484	821955	821484	821585	821914	821955	478	0.0239411	0.18258	0.344,0.378	0.489,0.475	-0.121	1584	ENSG00000134291.12	TMEM106C	chr12	+	47963595	47963704	47963595	47963633	47964208	47964423	0.118639	0.609129	0.22,0.475	0.404,0.0
45898	ENSG00000106077.19	ABHD11	chr7	-	73737875	73738072	73737567	73737735	73738327	73738463	346	0.000607221	0.0298402	0.058,0.0	0.177,0.518	-0.319		299	ENSG00000156253.7	RWDD2B	chr21	-	29008239	29008621	29008239	29008307	29008394	29008621	236	0.0243815	0.185638	0.174,0.112	0.265,0.469	-0.224	7753	ENSG00000153071.15	DAB2	chr5	-	39392203	39392463	39392364	39392463	39390443	39390575	0.119006	0.610026	0.037,0.06	0.0,0.0
27014	ENSG00000039319.17	ZFYVE16	chr5	+	80411645	80411773	80408023	80408153	80434108	80434217	277	0.000609701	0.0299137	0.11,0.105	0.035,0.0	0.09		3310	ENSG00000180104.16	EXOC3	chr5	+	464289	465272	464289	464412	465110	465272	847	0.024552	0.186452	1.0,0.802	1.0,0.599	0.102	102	ENSG00000102225.16	CDK16	chrX	+	47224384	47224518	47224384	47224476	47224617	47224743	0.120192	0.610925	0.993,0.957	0.99,1.0
18134	ENSG00000124508.17	BTN2A2	chr6	+	26385142	26385362	26383791	26383915	26388012	26388159	369	0.000615648	0.0301568	0.548,0.708	1.0,1.0	-0.372		4597	ENSG00000130307.12	USHBP1	chr19	-	17262551	17264150	17262551	17262990	17264001	17264150	1160	0.0245676	0.186452	1.0,1.0	0.162,1.0	0.419	786	ENSG00000132199.20	ENOSF1	chr18	-	712377	712630	712503	712630	706469	706578	0.120914	0.610925	0.0,0.119	0.448,0.0
10793	ENSG00000142252.11	GEMIN7	chr19	+	45079906	45080029	45079257	45079279	45090106	45090537	272	0.000617773	0.0301638	0.268,0.0	1.0,0.523	-0.628		1488	ENSG00000166783.22	MARF1	chr16	-	15634756	15636342	15634756	15634931	15635655	15636342	873	0.0246868	0.186488	0.14,0.096	0.058,0.058	0.06	3163	ENSG00000011454.18	RABGAP1	chr9	+	123065347	123065601	123065347	123065461	123070349	123070424	0.120789	0.610925	0.0,0.228	0.093,0.34
36700	ENSG00000175029.17	CTBP2	chr10	-	125160318	125160520	125038996	125039155	125160826	125161170	351	0.000617173	0.0301638	0.298,0.041	0.433,0.389	-0.242		3234	ENSG00000141503.17	MINK1	chr17	+	4889646	4890735	4889646	4889763	4890516	4890735	902	0.0246845	0.186488	0.792,0.536	1.0,1.0	-0.336	3598	ENSG00000167107.13	ACSF2	chr17	+	50461241	50461370	50461241	50461287	50461632	50461686	0.120493	0.610925	0.924,0.845	1.0,0.962
24658	ENSG00000163138.19	PACRGL	chr4	+	20709682	20709773	20704659	20704814	20712787	20712831	240	0.00062016	0.0302073	0.318,0.237	0.651,1.0	-0.548		4562	ENSG00000177646.20	ACAD9	chr3	+	128909343	128910813	128909343	128910149	128910740	128910813	740	0.0248888	0.186488	0.061,0.054	0.141,0.124	-0.075	4277	ENSG00000110619.18	CARS1	chr11	-	3001961	3002053	3001969	3002053	3000928	3001248	0.119614	0.610925	0.322,0.388	0.262,0.0
40577	ENSG00000113638.14	TTC33	chr5	-	40746797	40747019	40730261	40730343	40755823	40755908	371	0.00062065	0.0302073	1.0,1.0	0.0,1.0	0.5		4899	ENSG00000143442.22	POGZ	chr1	-	151406606	151407023	151406606	151406631	151406910	151407023	428	0.0247885	0.186488	0.06,0.044	0.034,0.024	0.023	6231	ENSG00000160948.14	VPS28	chr8	-	144425874	144426063	144425921	144426063	144424945	144425772	0.12054	0.610925	0.516,0.695	0.275,0.432
2409	ENSG00000124222.22	STX16	chr20	+	58667200	58667318	58652072	58652087	58667489	58667597	267	0.000622614	0.0302449	0.077,0.166	0.0,0.0	0.121		5355	ENSG00000144136.11	SLC20A1	chr2	+	112660386	112661226	112660386	112660572	112661141	112661226	718	0.0248373	0.186488	0.031,0.029	0.111,0.056	-0.054	7209	ENSG00000002016.18	RAD52	chr12	-	926795	927263	927144	927263	925449	925525	0.120231	0.610925	0.456,0.578	0.669,0.749
53768	ENSG00000158019.21	BABAM2	chr2	+	27892382	27892448	27890791	27890842	27894532	27894684	215	0.000623411	0.0302449	0.409,1.0	0.0,0.257	0.576		6536	ENSG00000167733.14	HSD11B1L	chr19	+	5684818	5685119	5684818	5684905	5684988	5685119	232	0.0247406	0.186488	0.3,0.562	1.0,0.616	-0.377	7805	ENSG00000119638.14	NEK9	chr14	-	75106465	75106702	75106501	75106702	75105949	75105996	0.11941	0.610925	0.212,0.0	0.147,0.227
7801	ENSG00000233098.9	CCDC144NL-AS1	chr17	+	20949102	20949441	20868546	20868685	20956193	20956353	488	0.000627046	0.0303565	1.0,0.676	1.0,1.0	-0.162		7297	ENSG00000179532.13	DNHD1	chr11	+	6570008	6571423	6570008	6570396	6570617	6571423	370	0.0248559	0.186488	0.518,0.903	0.617,1.0	-0.098	7874	ENSG00000114354.15	TFG	chr3	+	100736575	100736716	100736575	100736704	100744832	100744931	0.120526	0.610925	0.805,0.852	0.683,0.772
14653	ENSG00000168916.16	ZNF608	chr5	-	124638781	124638823	124636912	124637906	124639132	124639214	191	0.000627707	0.0303565	0.292,0.609	0.124,0.077	0.35		7887	ENSG00000175197.13	DDIT3	chr12	-	57517268	57517753	57517268	57517438	57517705	57517753	416	0.0248417	0.186488	0.388,0.417	0.622,0.67	-0.244	5503	ENSG00000137106.18	GRHPR	chr9	+	37422695	37422833	37422695	37422805	37424844	37424975	0.121769	0.614265	0.785,1.0	0.903,0.424
10496	ENSG00000257060.7	RP11-266O8.1	chr15	+	93373509	93373585	93322222	93322346	93496233	93496331	225	0.000631122	0.0304732	0.0,0.398	0.57,1.0	-0.586		1554	ENSG00000138834.14	MAPK8IP3	chr16	+	1767804	1768107	1767804	1767918	1768068	1768107	299	0.0249765	0.186552	0.032,0.069	0.0,0.03	0.036	956	ENSG00000012048.23	BRCA1	chr17	-	43091434	43094860	43094743	43094860	43090943	43091032	0.122649	0.617724	0.869,0.88	0.86,1.0
8177	ENSG00000124459.12	ZNF45	chr19	-	43925324	43925458	43924401	43924561	43931246	43931365	283	0.000636003	0.0306602	0.678,0.787	1.0,1.0	-0.267		5459	ENSG00000166333.14	ILK	chr11	+	6608693	6608967	6608693	6608790	6608883	6608967	242	0.0249765	0.186552	0.229,0.133	0.404,0.273	-0.158	4200	ENSG00000151692.15	RNF144A	chr2	+	7020472	7020768	7020472	7020680	7024368	7024516	0.123103	0.619025	0.167,0.028	0.046,0.037
16528	ENSG00000145246.14	ATP10D	chr4	+	47582868	47582961	47582030	47582064	47587018	47587206	242	0.000638337	0.030724	0.339,0.058	0.0,0.0	0.199		1259	ENSG00000129219.14	PLD2	chr17	+	4818001	4818385	4818001	4818106	4818296	4818385	339	0.0250966	0.187152	0.468,0.569	0.268,0.0	0.384	240	ENSG00000160226.16	CFAP410	chr21	-	44334060	44335804	44335757	44335804	44333032	44333262	0.123711	0.621098	0.223,0.304	0.317,0.764
10896	ENSG00000178802.18	MPI	chr15	+	74890526	74890654	74890038	74890089	74891378	74891489	277	0.000643078	0.030806	0.617,0.617	1.0,1.0	-0.383		3978	ENSG00000162576.17	MXRA8	chr1	-	1354192	1354509	1354192	1354232	1354353	1354509	270	0.0256271	0.190505	0.155,0.0	0.525,0.216	-0.293	1759	ENSG00000112514.18	CUTA	chr6	-	33417868	33418107	33417958	33418107	33417480	33417695	0.123979	0.62146	0.328,0.149	0.263,0.544
29968	ENSG00000163946.14	TASOR	chr3	-	56638705	56638765	56633043	56633966	56639985	56640130	209	0.000642387	0.030806	0.968,1.0	0.887,0.805	0.138		8065	ENSG00000159069.14	FBXW5	chr9	-	136942546	136942943	136942546	136942695	136942768	136942943	222	0.0256139	0.190505	0.171,0.055	0.161,0.427	-0.181	5334	ENSG00000174748.22	RPL15	chr3	+	23917131	23917239	23917131	23917173	23917849	23918031	0.125024	0.625709	0.228,0.057	0.197,0.223
62645	ENSG00000110172.12	CHORDC1	chr11	-	90206747	90206810	90206201	90206272	90210535	90210594	212	0.00064252	0.030806	0.26,0.345	0.0,0.0	0.302		5126	ENSG00000139641.13	ESYT1	chr12	+	56131039	56131316	56131039	56131113	56131243	56131316	279	0.0256959	0.190716	0.17,0.167	0.239,0.389	-0.145	823	ENSG00000141577.14	CEP131	chr17	-	81198105	81198297	81198114	81198297	81197711	81197888	0.126343	0.630324	0.0,1.0	0.0,0.0
31479	ENSG00000142949.17	PTPRF	chr1	+	43612767	43612800	43609382	43609498	43613617	43613715	182	0.000644266	0.0308144	0.071,0.059	0.0,0.01	0.06		3236	ENSG00000115207.13	GTF3C2	chr2	-	27335916	27336425	27335916	27336028	27336197	27336425	318	0.0257936	0.191141	0.058,0.066	0.0,0.019	0.052	2638	ENSG00000114423.23	CBLB	chr3	-	105681292	105681610	105681478	105681610	105678430	105678571	0.126319	0.630324	0.01,0.0	0.044,0.027
38998	ENSG00000166881.10	NEMP1	chr12	-	57069233	57069306	57064645	57064739	57070819	57070893	222	0.000646324	0.0308643	0.335,0.535	1.0,0.751	-0.44		1580	ENSG00000140983.14	RHOT2	chr16	+	669552	670175	669552	669606	670122	670175	665	0.0258981	0.191613	0.831,0.44	1.0,1.0	-0.365	3531	ENSG00000127990.19	SGCE	chr7	-	94599696	94600857	94600645	94600857	94598774	94598963	0.127763	0.636409	0.808,0.797	1.0,1.0
9037	ENSG00000141084.11	RANBP10	chr16	-	67744287	67744455	67738012	67738035	67772033	67772086	317	0.000648735	0.0308824	0.912,0.564	1.0,1.0	-0.262		4151	ENSG00000182389.20	CACNB4	chr2	-	151870530	151872493	151870530	151870611	151872416	151872493	1954	0.0261512	0.193183	1.0,0.348	1.0,0.295	0.026	5076	ENSG00000091127.14	PUS7	chr7	-	105470687	105470848	105470760	105470848	105468336	105468463	0.128009	0.636635	0.668,0.919	1.0,1.0
22879	ENSG00000073712.15	FERMT2	chr14	-	52881795	52881828	52881243	52881469	52893292	52893333	182	0.000648567	0.0308824	0.0,0.0	0.079,0.141	-0.11		998	ENSG00000124140.14	SLC12A5	chr20	+	46034947	46035535	46034947	46035042	46035403	46035535	510	0.0263642	0.194451	0.189,0.226	1.0,0.467	-0.526	509	ENSG00000104859.15	CLASRP	chr19	+	45057749	45057898	45057749	45057882	45059267	45059364	0.12904	0.637044	1.0,1.0	0.878,0.76
23199	ENSG00000174606.14	ANGEL2	chr1	-	213000785	213000912	213000325	213000383	213005032	213005454	276	0.000649879	0.0308885	0.861,0.59	1.0,1.0	-0.274		3215	ENSG00000120549.18	KIAA1217	chr10	+	24544980	24547843	24544980	24545103	24545826	24547843	872	0.0264281	0.194618	1.0,0.339	0.672,1.0	-0.167	1991	ENSG00000141698.17	NT5C3B	chr17	-	41835587	41835957	41835858	41835957	41835202	41835272	0.129104	0.637044	0.185,0.039	0.09,0.032
42606	ENSG00000107249.24	GLIS3	chr9	-	4125733	4125941	4117767	4118881	4299420	4299547	357	0.000651702	0.0309269	0.902,0.814	1.0,1.0	-0.142		896	ENSG00000185624.16	P4HB	chr17	-	81845143	81845742	81845143	81845230	81845560	81845742	479	0.0266133	0.195677	0.035,0.077	0.293,0.094	-0.138	2444	ENSG00000205981.8	DNAJC19	chr3	-	180986942	180987022	180986997	180987022	180985925	180985996	0.128642	0.637044	0.894,0.894	1.0,0.908
35155	ENSG00000122705.17	CLTA	chr9	+	36210624	36210660	36209266	36209320	36211602	36211784	185	0.00065472	0.0310217	0.118,0.518	0.0,0.0	0.318		7778	ENSG00000110844.14	PRPF40B	chr12	+	49642234	49642675	49642234	49642372	49642579	49642675	356	0.0266792	0.195855	0.456,0.706	0.758,0.811	-0.204	3125	ENSG00000110514.19	MADD	chr11	+	47295495	47295576	47295495	47295567	47295896	47296055	0.129296	0.637044	0.35,0.586	0.611,0.739
35007	ENSG00000114735.10	HEMK1	chr3	+	50572114	50572208	50571709	50571801	50577051	50577132	243	0.000656825	0.031073	0.754,0.734	1.0,1.0	-0.256		4120	ENSG00000164683.18	HEY1	chr8	-	79766996	79767294	79766996	79767092	79767218	79767294	275	0.0268072	0.196489	0.765,0.119	1.0,0.655	-0.386	3440	ENSG00000121766.16	ZCCHC17	chr1	+	31346639	31346818	31346639	31346740	31348828	31348974	0.129253	0.637044	0.059,0.068	0.0,0.0
5647	ENSG00000101654.18	RNMT	chr18	+	13759941	13760208	13754113	13754147	13762038	13762344	416	0.000661453	0.0312434	0.682,0.642	1.0,1.0	-0.338		2925	ENSG00000138738.11	PRDM5	chr4	-	120816452	120816924	120816452	120816574	120816831	120816924	406	0.0274613	0.20097	0.854,0.355	1.0,1.0	-0.395	7026	ENSG00000172663.9	TMEM134	chr11	-	67468016	67468092	67468027	67468092	67467500	67467563	0.129142	0.637044	0.383,0.0	0.0,0.651
4821	ENSG00000142449.13	FBN3	chr19	-	8096443	8096569	8095963	8096080	8096880	8097006	275	0.000666586	0.0313968	1.0,0.387	1.0,1.0	-0.306		4906	ENSG00000166793.13	YPEL4	chr11	-	57646296	57646794	57646296	57646405	57646750	57646794	494	0.0276135	0.201771	0.934,0.962	1.0,1.0	-0.052	3403	ENSG00000090861.17	AARS1	chr16	-	70289420	70289555	70289529	70289555	70282619	70282784	0.129809	0.638396	0.902,0.761	0.822,1.0
35425	ENSG00000088038.19	CNOT3	chr19	+	54153180	54153393	54152866	54152999	54153496	54153840	362	0.000667839	0.0313968	1.0,0.0	1.0,1.0	-0.5		8301	ENSG00000172890.13	NADSYN1	chr11	+	71484311	71485648	71484311	71484447	71485541	71485648	1243	0.0277029	0.202111	0.065,0.161	0.057,0.036	0.067	5654	ENSG00000055609.21	KMT2C	chr7	-	152145152	152145295	152145164	152145295	152144712	152144881	0.129973	0.638396	0.391,0.34	0.629,0.408
39135	ENSG00000143442.22	POGZ	chr1	-	151411624	151411798	151408693	151408828	151412295	151412396	323	0.000668829	0.0313968	0.888,0.937	1.0,1.0	-0.087		589	ENSG00000167645.17	YIF1B	chr19	-	38307427	38307752	38307427	38307521	38307596	38307752	224	0.0281928	0.204875	0.1,0.137	0.322,0.307	-0.196	6713	ENSG00000059573.9	ALDH18A1	chr10	-	95633490	95633649	95633496	95633649	95632958	95633049	0.131226	0.643555	0.943,0.941	0.794,0.903
53499	ENSG00000137573.14	SULF1	chr8	+	69495764	69495926	69492792	69493125	69501873	69501968	311	0.000667101	0.0313968	0.193,0.434	0.0,0.193	0.217		4300	ENSG00000115073.8	ACTR1B	chr2	-	97658426	97659003	97658426	97658643	97658878	97659003	384	0.0282122	0.204875	0.202,0.158	0.28,0.323	-0.121	1685	ENSG00000095564.14	BTAF1	chr10	+	91959064	91959282	91959064	91959154	91959784	91959880	0.132521	0.646908	0.465,0.561	0.633,0.683
65916	ENSG00000184154.15	LRTOMT	chr11	+	72085410	72085573	72080594	72080885	72088296	72088380	312	0.000682381	0.0319344	0.323,1.0	0.0,0.0	0.661		4764	ENSG00000115677.18	HDLBP	chr2	-	241268953	241269295	241268953	241269105	241269200	241269295	244	0.0281297	0.204875	0.753,1.0	1.0,1.0	-0.123	4237	ENSG00000171960.12	PPIH	chr1	+	42659227	42659370	42659227	42659251	42659521	42659566	0.132472	0.646908	0.047,0.06	0.069,0.0
66287	ENSG00000111011.18	RSRC2	chr12	-	122520503	122520581	122518838	122519029	122521384	122521428	227	0.000681735	0.0319344	1.0,0.766	0.304,0.568	0.447		916	ENSG00000184009.13	ACTG1	chr17	-	81511187	81512142	81511187	81511803	81511902	81512142	248	0.0284006	0.20565	0.888,0.907	0.95,0.937	-0.046	5615	ENSG00000196262.15	PPIA	chr7	+	44798747	44798904	44798747	44798814	44799246	44799277	0.132349	0.646908	0.384,0.555	0.272,0.0
4043	ENSG00000188227.13	ZNF793	chr19	+	37520183	37520312	37508263	37508403	37522531	37522647	278	0.000686614	0.0320831	0.446,0.0	1.0,1.0	-0.777		1589	ENSG00000161996.19	WDR90	chr16	+	653745	655147	653745	653803	655028	655147	1374	0.0284062	0.20565	0.752,1.0	1.0,0.407	0.172	843	ENSG00000177728.17	TMEM94	chr17	+	75491690	75491900	75491690	75491852	75492473	75492789	0.132923	0.647872	0.312,0.558	0.654,0.602
4047	ENSG00000181666.18	ZNF875	chr19	+	37322184	37322232	37317886	37318186	37323532	37323570	197	0.000694351	0.0323772	1.0,0.858	0.431,0.431	0.498		7562	ENSG00000101158.15	NELFCD	chr20	+	58994641	58995133	58994641	58994824	58994925	58995133	250	0.0288382	0.208458	1.0,1.0	0.889,0.889	0.111	4045	ENSG00000221838.10	AP4M1	chr7	+	100101879	100102393	100101879	100101989	100102674	100102781	0.133203	0.648167	1.0,1.0	0.212,1.0
55833	ENSG00000184949.18	FAM227A	chr22	-	38639654	38639724	38638745	38638822	38645562	38645645	219	0.000695037	0.0323772	0.898,1.0	0.62,0.773	0.253		2120	ENSG00000076706.17	MCAM	chr11	-	119310755	119311421	119310755	119311185	119311279	119311421	243	0.0289079	0.208641	0.14,0.063	0.096,0.0	0.054	5664	ENSG00000042317.17	SPATA7	chr14	+	88385672	88386031	88385672	88385837	88391380	88391455	0.133392	0.648167	0.148,0.0	0.303,0.0
7970	ENSG00000175061.18	SNHG29	chr17	+	16439527	16439703	16439062	16439414	16440184	16440253	325	0.000699845	0.0325514	0.357,0.283	0.202,0.225	0.106		3641	ENSG00000172590.18	MRPL52	chr14	+	22829886	22830110	22829886	22829940	22830052	22830110	261	0.0291269	0.2099	0.125,0.222	1.0,0.363	-0.508	5025	ENSG00000237765.8	FAM200B	chr4	+	15681755	15681901	15681755	15681784	15686235	15686462	0.133879	0.649537	0.905,0.727	0.826,0.395
29688	ENSG00000078177.14	N4BP2	chr4	+	40073454	40073551	40056849	40057030	40102074	40102606	246	0.000704141	0.0327012	1.0,1.0	0.568,1.0	0.216		1505	ENSG00000033011.14	ALG1	chr16	+	5073152	5075536	5073152	5073256	5075387	5075536	2280	0.0293179	0.210955	0.189,0.122	0.057,0.082	0.086	1907	ENSG00000126091.21	ST3GAL3	chr1	+	43736232	43736425	43736232	43736380	43814890	43814933	0.13439	0.651022	0.204,0.277	0.535,0.406
660	ENSG00000235437.8	LINC01278	chrX	-	63516909	63517082	63509941	63510079	63560831	63560915	322	0.000715352	0.0330494	1.0,1.0	0.712,0.797	0.246		424	ENSG00000101266.19	CSNK2A1	chr20	-	487426	488778	487426	487575	488677	488778	1251	0.0296572	0.212423	0.044,0.027	0.023,0.02	0.014	2596	ENSG00000175455.16	CCDC14	chr3	-	123946802	123947319	123947279	123947319	123944848	123944990	0.134933	0.652657	0.977,0.924	0.846,0.964
5623	ENSG00000141452.10	RMC1	chr18	+	23506969	23507054	23504370	23504447	23507984	23508041	234	0.000717099	0.0330494	0.761,0.908	1.0,1.0	-0.165		6543	ENSG00000241852.10	C8orf58	chr8	+	22601971	22602312	22601971	22602080	22602199	22602312	268	0.0296421	0.212423	0.058,0.0	0.0,0.178	-0.06	2438	ENSG00000125107.19	CNOT1	chr16	-	58556846	58556993	58556861	58556993	58555783	58555908	0.136061	0.657112	0.705,0.769	0.618,0.645
13529	ENSG00000198324.14	PHETA1	chr12	-	111365563	111365651	111360650	111363463	111366112	111366257	237	0.000713873	0.0330494	0.117,0.225	0.0,0.05	0.146		7408	ENSG00000167986.15	DDB1	chr11	-	61302256	61302751	61302256	61302359	61302581	61302751	371	0.0295872	0.212423	0.135,0.127	0.053,0.077	0.066	1064	ENSG00000105483.18	CARD8	chr19	-	48232452	48234543	48234402	48234543	48231659	48231810	0.136574	0.657695	0.646,0.366	0.671,0.69
15371	ENSG00000081377.17	CDC14B	chr9	-	96509672	96509789	96500107	96503789	96522505	96522603	266	0.000716831	0.0330494	0.677,0.887	1.0,1.0	-0.218		1174	ENSG00000175061.18	SNHG29	chr17	+	16439326	16439703	16439326	16439414	16439527	16439703	262	0.0299299	0.213543	0.212,0.219	0.283,0.332	-0.092	1647	ENSG00000112319.20	EYA4	chr6	+	133468565	133468749	133468565	133468731	133481462	133481599	0.136597	0.657695	0.0,0.0	0.0,1.0
33378	ENSG00000144559.10	TAMM41	chr3	-	11844890	11845096	11844028	11844211	11846501	11846885	355	0.000713473	0.0330494	0.195,0.201	0.103,0.0	0.147		2198	ENSG00000186468.13	RPS23	chr5	-	82275208	82276255	82275208	82275295	82276177	82276255	1031	0.0298661	0.213543	1.0,0.987	0.974,0.964	0.025	1698	ENSG00000135597.19	REPS1	chr6	-	138912674	138912950	138912764	138912950	138911275	138911371	0.137015	0.658712	0.008,0.02	0.01,0.062
45148	ENSG00000138798.13	EGF	chr4	+	110008151	110008230	110004500	110004622	110011201	110011491	228	0.000718159	0.0330494	0.662,0.567	0.0,0.395	0.417		7285	ENSG00000170175.11	CHRNB1	chr17	+	7447042	7447650	7447042	7447151	7447502	7447650	500	0.0299495	0.213543	0.41,1.0	1.0,1.0	-0.295	632	ENSG00000011243.19	AKAP8L	chr19	-	15403652	15403715	15403657	15403715	15403474	15403555	0.138686	0.664729	0.446,0.279	0.492,0.795
30166	ENSG00000223960.7	CHROMR	chr2	+	178426365	178426505	178413944	178414113	178430694	178430889	289	0.000723254	0.0332337	1.0,0.791	0.541,0.555	0.347		1637	ENSG00000177082.13	WDR73	chr15	-	84647889	84648625	84647889	84647954	84648536	84648625	731	0.0299984	0.213568	0.428,0.572	0.29,0.341	0.184	1155	ENSG00000185359.14	HGS	chr17	+	81695785	81696041	81695785	81695999	81696356	81696529	0.13868	0.664729	0.0,0.0	0.094,0.08
57944	ENSG00000150527.17	MIA2	chr14	+	39320927	39321056	39319208	39319291	39326863	39327022	278	0.00072682	0.0333471	0.641,1.0	1.0,1.0	-0.179		5684	ENSG00000233184.7	RP11-421L21.3	chr1	+	101080886	101083574	101080886	101080998	101083460	101083574	2611	0.0300501	0.213614	1.0,0.492	1.0,1.0	-0.254	1176	ENSG00000261556.10	SMG1P7	chr16	-	70241006	70241260	70241035	70241260	70235312	70235443	0.139141	0.664901	0.122,0.0	0.143,0.107
50138	ENSG00000223705.9	NSUN5P1	chr7	+	75410605	75410726	75410361	75410460	75414884	75415023	270	0.000732716	0.033567	0.0,0.453	1.0,0.768	-0.657		5910	ENSG00000106009.16	BRAT1	chr7	-	2537880	2539351	2537880	2538764	2539178	2539351	563	0.0302187	0.214489	0.196,0.229	0.57,0.335	-0.24	2788	ENSG00000013573.17	DDX11	chr12	+	31102267	31102335	31102267	31102311	31102426	31102527	0.13909	0.664901	0.0,0.365	0.0,0.197
24825	ENSG00000116285.13	ERRFI1	chr1	-	8015307	8015400	8014039	8014396	8015494	8015692	242	0.00073728	0.0337253	0.732,0.896	0.934,1.0	-0.153		1232	ENSG00000006047.13	YBX2	chr17	-	7291092	7292059	7291092	7291182	7292025	7292059	992	0.0303165	0.21486	1.0,1.0	1.0,0.131	0.434	236	ENSG00000197381.17	ADARB1	chr21	+	45222017	45223577	45222017	45222107	45225546	45226560	0.139711	0.665618	0.584,0.503	1.0,0.535
17234	ENSG00000180801.14	ARSJ	chr4	-	113906664	113906745	113902351	113903675	113978436	113979092	230	0.000741586	0.0338713	0.341,0.191	0.178,0.0	0.177		5188	ENSG00000132781.20	MUTYH	chr1	-	45331660	45332086	45331660	45331849	45332022	45332086	322	0.0305538	0.215937	0.481,0.316	0.055,0.209	0.266	7218	ENSG00000111203.13	ITFG2	chr12	+	2823769	2824013	2823769	2823943	2824089	2824252	0.139542	0.665618	0.189,0.082	0.093,0.058
2442	ENSG00000087586.18	AURKA	chr20	-	56390555	56390665	56388155	56388202	56392167	56392202	259	0.000748532	0.0341105	1.0,0.463	0.0,0.365	0.549		8303	ENSG00000146263.12	MMS22L	chr6	-	97263334	97268002	97263334	97263448	97267871	97268002	4572	0.0305602	0.215937	0.136,0.146	0.061,0.108	0.057	11	ENSG00000124333.16	VAMP7	chrX	+	155889457	155889633	155889457	155889612	155898111	155898249	0.142817	0.679399	0.0,0.637	0.0,1.0
14230	ENSG00000196839.13	ADA	chr20	-	44623006	44623078	44622828	44622930	44624201	44624329	221	0.000749204	0.0341105	0.881,0.687	1.0,1.0	-0.216		2518	ENSG00000112640.16	PPP2R5D	chr6	+	43008366	43009227	43008366	43008475	43009056	43009227	730	0.0306221	0.216051	0.803,0.692	1.0,0.877	-0.191	3588	ENSG00000177410.13	ZFAS1	chr20	+	49278641	49278738	49278641	49278716	49279103	49279208	0.143494	0.681595	0.0,0.028	0.053,0.03
31906	ENSG00000116001.17	TIA1	chr2	-	70229058	70229091	70227734	70227822	70229263	70229318	182	0.000750187	0.0341105	0.823,0.796	0.95,0.921	-0.126		1875	ENSG00000175899.15	A2M	chr12	-	9067711	9068224	9067711	9067839	9068182	9068224	492	0.0311596	0.219187	0.102,0.173	0.052,0.061	0.081	425	ENSG00000178935.5	ZNF552	chr19	-	57814532	57814913	57814710	57814913	57813293	57813420	0.145053	0.683064	1.0,0.0	0.313,1.0
32691	ENSG00000106070.20	GRB10	chr7	-	50732271	50732368	50727792	50727890	50755886	50755903	246	0.000753725	0.0342083	1.0,1.0	0.602,0.679	0.359		3490	ENSG00000168256.18	NKIRAS2	chr17	+	42022398	42022640	42022398	42022472	42022564	42022640	241	0.0311503	0.219187	0.317,1.0	0.65,1.0	-0.166	2852	ENSG00000124151.19	NCOA3	chr20	+	47649004	47649109	47649004	47649097	47650981	47651276	0.144418	0.683064	0.27,0.552	0.764,0.481
60506	ENSG00000110713.17	NUP98	chr11	-	3686063	3686194	3683199	3683441	3691346	3691489	280	0.000754586	0.0342083	0.889,1.0	0.651,0.78	0.229		3407	ENSG00000143543.15	JTB	chr1	-	153976692	153977013	153976692	153976775	153976975	153977013	349	0.0312376	0.219408	0.214,0.416	0.041,0.176	0.207	3144	ENSG00000170949.18	ZNF160	chr19	-	53091412	53091720	53091636	53091720	53086261	53086321	0.145024	0.683064	0.827,0.769	0.473,0.8
41951	ENSG00000144451.19	SPAG16	chr2	+	213350527	213350645	213340162	213340270	213364075	213364145	267	0.000764442	0.0345521	0.899,0.879	0.513,0.645	0.31		1079	ENSG00000168610.16	STAT3	chr17	-	42316788	42317224	42316788	42316901	42317181	42317224	429	0.0313006	0.219523	0.038,0.025	0.069,0.054	-0.03	3326	ENSG00000164609.10	SLU7	chr5	-	160418595	160419081	160419022	160419081	160415124	160415310	0.145095	0.683064	0.206,0.341	0.0,0.0
54092	ENSG00000173875.14	ZNF791	chr19	+	12612225	12612365	12610919	12611082	12623699	12623826	289	0.00076385	0.0345521	0.407,0.147	0.0,0.0	0.277		8087	ENSG00000165533.19	TTC8	chr14	+	88841036	88841514	88841036	88841196	88841424	88841514	377	0.0313777	0.219737	0.613,0.441	0.0,0.229	0.413	5973	ENSG00000110911.17	SLC11A2	chr12	-	51026309	51026384	51026314	51026384	51010694	51010766	0.144845	0.683064	0.195,0.421	0.492,0.575
44107	ENSG00000170873.19	MTSS1	chr8	-	124557680	124557875	124556260	124556354	124558712	124558832	344	0.000776731	0.0350555	0.704,0.464	1.0,1.0	-0.416		1999	ENSG00000181163.14	NPM1	chr5	+	171391304	171391799	171391304	171391424	171391705	171391799	430	0.0316903	0.221357	0.06,0.064	0.072,0.152	-0.05	7349	ENSG00000139625.13	MAP3K12	chr12	-	53484245	53484365	53484256	53484365	53483910	53484020	0.144984	0.683064	0.0,0.0	0.237,0.189
42435	ENSG00000117859.19	OSBPL9	chr1	+	51669433	51669512	51651990	51652041	51714002	51714079	228	0.000779429	0.0351251	0.797,0.803	0.924,1.0	-0.162		4436	ENSG00000131591.18	C1orf159	chr1	-	1083914	1084383	1083914	1084086	1084352	1084383	415	0.0317029	0.221357	0.749,0.924	1.0,0.852	-0.089	3161	ENSG00000156687.11	UNC5D	chr8	+	35722209	35722395	35722209	35722356	35726151	35726529	0.145673	0.684071	0.735,0.613	0.0,1.0
60536	ENSG00000133943.21	DGLUCY	chr14	+	91145220	91145313	91114369	91114528	91157638	91157690	242	0.000787788	0.0354233	0.141,0.291	0.0,0.0	0.216		480	ENSG00000213024.12	NUP62	chr19	-	49927693	49929504	49927693	49927815	49929416	49929504	1750	0.0319335	0.221653	1.0,0.89	0.736,1.0	0.077	4187	ENSG00000235597.2	LINC01102	chr2	+	104505865	104506303	104505865	104505944	104507231	104507406	0.14574	0.684071	1.0,1.0	1.0,0.0
65036	ENSG00000103034.14	NDRG4	chr16	+	58499143	58501077	58494963	58495008	58503797	58503903	2083	0.000788375	0.0354233	0.136,1.0	1.0,1.0	-0.432		932	ENSG00000129657.16	SEC14L1	chr17	+	77213917	77216802	77213917	77214019	77216548	77216802	2678	0.0319147	0.221653	0.707,0.696	0.837,0.824	-0.129	1510	ENSG00000138606.19	SHF	chr15	-	45172146	45172318	45172148	45172318	45171882	45172002	0.145996	0.68426	0.447,0.212	0.597,0.413
64452	ENSG00000123352.18	SPATS2	chr12	+	49371227	49371290	49366904	49367587	49460769	49461037	212	0.000789548	0.0354237	0.711,0.0	1.0,0.808	-0.548		5034	ENSG00000136699.20	SMPD4	chr2	-	130154276	130155259	130154276	130154482	130155095	130155259	762	0.0318926	0.221653	0.6,0.518	0.37,0.241	0.253	2935	ENSG00000186001.14	LRCH3	chr3	+	197835673	197835822	197835673	197835738	197839320	197839397	0.14815	0.6891	1.0,1.0	0.911,0.94
48273	ENSG00000132330.18	SCLY	chr2	+	238073782	238073847	238069296	238069477	238081708	238081836	214	0.000790731	0.0354245	0.188,0.41	0.148,0.0	0.225		6343	ENSG00000106462.12	EZH2	chr7	-	148816683	148818117	148816683	148817391	148817876	148818117	634	0.0318925	0.221653	0.265,0.316	0.434,0.365	-0.109	4290	ENSG00000092148.13	HECTD1	chr14	-	31122913	31123047	31122919	31123047	31121382	31121505	0.147433	0.6891	0.735,0.75	0.771,0.894
39480	ENSG00000171307.19	ZDHHC16	chr10	+	97450356	97450536	97446174	97446353	97451670	97451918	329	0.000794713	0.0355506	0.0,1.0	1.0,1.0	-0.5		3925	ENSG00000115226.10	FNDC4	chr2	-	27493929	27494466	27493929	27494134	27494350	27494466	365	0.0321491	0.222544	0.214,0.0	0.333,0.14	-0.13	6929	ENSG00000213619.11	NDUFS3	chr11	+	47579268	47579338	47579268	47579334	47580524	47580622	0.147588	0.6891	0.0,0.0	0.042,0.092
28207	ENSG00000170153.11	RNF150	chr4	-	140925976	140926073	140911052	140911354	140947653	140947736	246	0.0007959	0.0355514	1.0,1.0	1.0,0.758	0.121		6076	ENSG00000189077.11	TMEM120A	chr7	-	75988082	75988341	75988082	75988148	75988251	75988341	252	0.0321563	0.222544	0.085,0.171	0.024,0.064	0.084	6990	ENSG00000168066.21	SF1	chr11	-	64767566	64767844	64767570	64767844	64767191	64767251	0.148331	0.6891	0.134,0.093	0.092,0.071
7588	ENSG00000167775.11	CD320	chr19	-	8303854	8304088	8302776	8302980	8308148	8308350	383	0.00080208	0.0357249	1.0,0.925	0.877,0.656	0.196		3973	ENSG00000123066.9	MED13L	chr12	-	115975170	115975738	115975170	115975349	115975514	115975738	314	0.0324418	0.224168	0.655,0.613	0.781,1.0	-0.257	7297	ENSG00000167528.13	ZNF641	chr12	-	48347148	48347343	48347251	48347343	48344598	48344712	0.147879	0.6891	0.165,1.0	1.0,0.639
47377	ENSG00000146350.14	TBC1D32	chr6	-	121256083	121256285	121255327	121255410	121279120	121279245	351	0.000802134	0.0357249	1.0,1.0	0.56,0.68	0.38		5595	ENSG00000013441.16	CLK1	chr2	-	200856890	200857884	200856890	200856985	200857717	200857884	881	0.032486	0.224168	0.097,0.124	0.202,0.154	-0.067	7630	ENSG00000174547.13	MRPL11	chr11	-	66438631	66438848	66438709	66438848	66438163	66438259	0.148058	0.6891	1.0,1.0	0.868,0.798
39102	ENSG00000100294.13	MCAT	chr22	-	43137080	43137298	43132208	43133486	43141161	43141249	367	0.000803429	0.0357303	0.659,0.702	0.83,1.0	-0.235		4620	ENSG00000110888.17	CAPRIN2	chr12	-	30719078	30720915	30719078	30719225	30720810	30720915	1734	0.0326009	0.224476	0.501,1.0	0.462,0.264	0.387	6938	ENSG00000172613.8	RAD9A	chr11	+	67396110	67396175	67396110	67396171	67396262	67396400	0.149204	0.692141	0.814,0.736	0.577,0.619
66490	ENSG00000161265.15	U2AF1L4	chr19	-	35743154	35743345	35742530	35742803	35743808	35743904	340	0.000805419	0.0357665	0.0,1.0	1.0,1.0	-0.5		5150	ENSG00000196975.16	ANXA4	chr2	+	69807905	69810673	69807905	69807996	69810593	69810673	2746	0.032626	0.224476	0.303,1.0	0.178,1.0	0.062	7092	ENSG00000099949.21	LZTR1	chr22	+	20990385	20990969	20990385	20990525	20991627	20991829	0.149461	0.692321	0.0,0.112	0.0,0.03
47691	ENSG00000162631.20	NTNG1	chr1	+	107324281	107324922	107148068	107148839	107395153	107395326	790	0.000810206	0.0359266	1.0,1.0	0.72,0.806	0.237		5165	ENSG00000198690.10	FAN1	chr15	+	30925788	30928656	30925788	30925939	30928552	30928656	2762	0.0326966	0.224635	0.327,0.407	0.702,0.506	-0.237	6591	ENSG00000152455.16	SUV39H2	chr10	+	14896845	14897517	14896845	14896977	14899538	14899685	0.150591	0.69654	0.931,0.944	0.981,0.964
25383	ENSG00000135503.13	ACVR1B	chr12	+	51986817	51986942	51985191	51985348	51991862	51991993	274	0.000811862	0.0359477	0.847,0.918	1.0,1.0	-0.117		1961	ENSG00000197102.14	DYNC1H1	chr14	+	102042227	102042507	102042227	102042288	102042383	102042507	244	0.0330699	0.225966	0.038,0.037	0.026,0.014	0.017	3536	ENSG00000198830.11	HMGN2	chr1	+	26473702	26473817	26473702	26473732	26474084	26474135	0.151389	0.698273	0.086,0.044	0.089,0.08
56427	ENSG00000106723.17	SPIN1	chr9	+	88418849	88418951	88388443	88388538	88426381	88426591	251	0.000814044	0.0359919	0.312,0.237	0.065,0.086	0.199		2789	ENSG00000124593.16	RP11-298J23.10	chr6	+	41783461	41784238	41783461	41783605	41783733	41784238	277	0.0332741	0.225966	1.0,1.0	0.617,0.729	0.327	3903	ENSG00000124496.12	TRERF1	chr6	-	42263259	42263568	42263319	42263568	42259338	42259723	0.151626	0.698273	0.924,0.781	0.903,0.762
10508	ENSG00000257060.7	RP11-266O8.1	chr15	+	93522490	93522665	93498520	93498757	93530236	93530437	324	0.000818816	0.0360979	0.216,0.216	0.0,0.0	0.216		3070	ENSG00000135775.14	COG2	chr1	+	230669355	230671640	230669355	230669535	230671515	230671640	2129	0.0332722	0.225966	0.313,0.467	0.098,0.223	0.23	7499	ENSG00000133107.15	TRPC4	chr13	-	37651249	37651459	37651264	37651459	37639257	37639299	0.151514	0.698273	0.0,0.232	0.0,0.0
39269	ENSG00000145349.18	CAMK2D	chr4	-	113547643	113547716	113537340	113537443	113548656	113548729	222	0.000818036	0.0360979	0.0,0.0	0.075,0.183	-0.129		3582	ENSG00000125651.14	GTF2F1	chr19	-	6380903	6381195	6380903	6381042	6381121	6381195	228	0.0331141	0.225966	0.116,0.0	0.353,0.0	-0.118	2543	ENSG00000163938.17	GNL3	chr3	+	52688108	52688206	52688108	52688192	52689073	52689206	0.152328	0.698462	0.0,0.132	0.143,0.084
17393	ENSG00000072310.18	SREBF1	chr17	-	17817547	17817591	17817255	17817457	17817695	17817916	193	0.000832085	0.0363667	0.213,0.0	0.0,0.0	0.106		5818	ENSG00000115464.15	USP34	chr2	-	61236025	61236389	61236025	61236073	61236324	61236389	400	0.0330172	0.225966	0.834,1.0	0.651,0.691	0.246	2598	ENSG00000175455.16	CCDC14	chr3	-	123955842	123956795	123956739	123956795	123948895	123949132	0.152143	0.698462	0.907,1.0	1.0,0.795
29690	ENSG00000078177.14	N4BP2	chr4	+	40097226	40097569	40056849	40057030	40102074	40103218	492	0.000831308	0.0363667	1.0,1.0	0.431,1.0	0.284		6199	ENSG00000006015.18	REX1BD	chr19	+	18588994	18589683	18588994	18589077	18589478	18589683	550	0.0332044	0.225966	1.0,1.0	0.498,1.0	0.251	4350	ENSG00000124571.18	XPO5	chr6	-	43573397	43573601	43573479	43573601	43572505	43572578	0.152269	0.698462	0.0,0.0	0.0,0.139
34586	ENSG00000116688.18	MFN2	chr1	+	11982066	11982114	11980190	11980484	11989164	11989343	197	0.000827601	0.0363667	0.735,0.928	0.946,1.0	-0.141		6776	ENSG00000137073.24	UBAP2	chr9	-	33922965	33923293	33922965	33923033	33923185	33923293	301	0.0329912	0.225966	0.398,0.224	0.474,0.69	-0.271	5342	ENSG00000136811.16	ODF2	chr9	+	128460941	128461067	128460941	128461010	128469182	128469353	0.152878	0.699972	0.711,0.694	0.91,0.726
57014	ENSG00000183826.18	BTBD9	chr6	-	38612833	38613033	38597909	38598121	38639799	38639868	349	0.000828973	0.0363667	0.0,1.0	0.299,1.0	-0.149		7947	ENSG00000227057.10	WDR46	chr6	-	33280427	33280987	33280427	33280522	33280673	33280987	300	0.0332567	0.225966	1.0,0.332	0.498,1.0	-0.083	3119	ENSG00000163017.14	ACTG2	chr2	+	73901275	73901480	73901275	73901437	73908672	73908783	0.153773	0.702213	1.0,0.0	0.0,0.0
58869	ENSG00000151150.22	ANK3	chr10	-	60137341	60137353	60134270	60134358	60138963	60139087	161	0.000829869	0.0363667	0.718,1.0	0.209,0.51	0.499		5292	ENSG00000221978.12	CCNL2	chr1	-	1390765	1391575	1390765	1390865	1391296	1391575	580	0.0334572	0.226883	0.941,0.917	0.975,0.969	-0.043	6169	ENSG00000156795.8	NTAQ1	chr8	+	123416773	123416932	123416773	123416856	123427923	123428023	0.15381	0.702213	0.398,0.398	0.181,0.249
67421	ENSG00000088448.14	ANKRD10	chr13	-	110894284	110894393	110894108	110894202	110906032	110906124	258	0.000829204	0.0363667	1.0,0.435	0.161,0.0	0.637		6503	ENSG00000260669.2	AL136419.6	chr14	-	24215551	24215797	24215551	24215662	24215736	24215797	223	0.0336426	0.227813	1.0,0.572	0.572,0.0	0.5	1756	ENSG00000075711.21	DLG1	chr3	-	197298417	197298612	197298535	197298612	197297185	197297235	0.154082	0.702444	0.736,1.0	0.358,0.661
24473	ENSG00000138375.13	SMARCAL1	chr2	+	216438419	216438485	216435337	216435496	216447017	216447158	215	0.000837391	0.036546	0.9,0.884	1.0,1.0	-0.108		1207	ENSG00000179029.15	TMEM107	chr17	-	8175756	8176026	8175756	8175857	8175958	8176026	250	0.0339646	0.228679	0.484,0.835	0.346,0.373	0.3	737	ENSG00000196628.20	TCF4	chr18	-	55586920	55587136	55587044	55587136	55585279	55585352	0.154654	0.703137	0.112,0.19	0.135,0.033
18318	ENSG00000116455.14	WDR77	chr1	-	111441498	111441604	111441297	111441389	111442024	111442093	255	0.000847196	0.0368682	0.05,0.019	0.133,0.072	-0.068		1425	ENSG00000196118.12	CCDC189	chr16	-	30759341	30759724	30759341	30759557	30759653	30759724	245	0.0338965	0.228679	0.753,1.0	0.785,0.549	0.21	2293	ENSG00000139531.13	SUOX	chr12	+	55999332	55999590	55999332	55999458	56002211	56002271	0.154749	0.703137	0.132,0.614	0.515,0.515
68416	ENSG00000100307.13	CBX7	chr22	-	39134400	39134473	39133583	39134048	39138635	39138702	222	0.000846963	0.0368682	0.701,0.402	1.0,1.0	-0.449		5743	ENSG00000089916.18	GPATCH2L	chr14	+	76173545	76176690	76173545	76173625	76176622	76176690	3146	0.0338298	0.228679	0.063,0.055	0.068,0.021	0.014	2387	ENSG00000242086.8	MUC20-OT1	chr3	+	195708153	195708513	195708153	195708268	195708746	195708841	0.15533	0.703137	0.542,0.773	1.0,0.621
53815	ENSG00000118961.15	LDAH	chr2	-	20801309	20801465	20790254	20790398	20823036	20823101	305	0.000849467	0.0369142	0.84,0.9	1.0,1.0	-0.13		7386	ENSG00000182087.14	TMEM259	chr19	-	1011095	1011499	1011095	1011195	1011366	1011499	320	0.033944	0.228679	0.08,0.016	0.018,0.021	0.029	3431	ENSG00000127483.19	HP1BP3	chr1	-	20786252	20786652	20786648	20786652	20780344	20780540	0.155342	0.703137	0.611,0.389	0.646,0.649
59379	ENSG00000223482.8	NUTM2A-AS1	chr10	-	87333825	87334814	87330891	87331096	87336785	87336829	1138	0.000856742	0.0371772	0.07,0.106	0.554,0.272	-0.325		5409	ENSG00000100911.16	PSME2	chr14	-	24144399	24145155	24144399	24144468	24145057	24145155	738	0.0341401	0.229533	0.082,0.144	0.026,0.065	0.067	7227	ENSG00000250510.8	GPR162	chr12	+	6823467	6824765	6823467	6823763	6825483	6825673	0.154899	0.703137	0.888,0.644	0.524,0.66
22615	ENSG00000181458.10	TMEM45A	chr3	+	100519461	100519608	100492650	100492928	100555208	100555401	296	0.00086104	0.0373105	0.502,0.43	1.0,0.779	-0.423		3543	ENSG00000112855.17	HARS2	chr5	+	140693490	140693665	140693490	140693508	140693590	140693665	231	0.0342072	0.229656	0.301,1.0	1.0,1.0	-0.35	1284	ENSG00000079616.13	KIF22	chr16	+	29803997	29804107	29803997	29804065	29804813	29805026	0.156276	0.705356	0.0,0.064	0.08,0.084
39861	ENSG00000084676.16	NCOA1	chr2	+	24768078	24768135	24762686	24762776	24768223	24768543	206	0.000865982	0.037365	0.743,1.0	0.42,0.0	0.661		2389	ENSG00000090447.12	TFAP4	chr16	-	4261778	4262422	4261778	4261949	4262323	4262422	523	0.0343706	0.230031	0.363,0.143	0.533,0.474	-0.251	2406	ENSG00000079215.15	SLC1A3	chr5	+	36629449	36630482	36629449	36629587	36671028	36671233	0.156181	0.705356	0.708,0.576	0.573,0.407
44617	ENSG00000254536.2	RP11-108K14.8	chr10	+	133399169	133399226	133398434	133398515	133402148	133402245	206	0.000865982	0.037365	1.0,1.0	0.0,0.42	0.79		2567	ENSG00000124356.17	STAMBP	chr2	+	73847386	73847753	73847386	73847572	73847662	73847753	239	0.0344898	0.230031	0.949,0.896	1.0,0.939	-0.047	1293	ENSG00000188603.22	CLN3	chr16	-	28491481	28491835	28491713	28491835	28489289	28489386	0.156994	0.706593	1.0,0.689	1.0,1.0
59151	ENSG00000120160.11	EQTN	chr9	-	27292400	27292487	27291018	27291063	27294315	27294402	236	0.000865002	0.037365	1.0,1.0	1.0,0.0	0.5		5349	ENSG00000153094.24	BCL2L11	chr2	+	111123732	111124139	111123732	111123869	111124049	111124139	329	0.034507	0.230031	0.968,0.831	0.798,0.75	0.125	3470	ENSG00000254996.5	ANKHD1-EIF4EBP3	chr5	+	140538085	140538261	140538085	140538234	140538918	140539083	0.157017	0.706593	0.923,0.888	0.853,0.849
42436	ENSG00000117859.19	OSBPL9	chr1	+	51669433	51669814	51651990	51652041	51714002	51714079	530	0.000867213	0.0373651	0.445,0.36	0.717,1.0	-0.456		7309	ENSG00000110321.19	EIF4G2	chr11	-	10803479	10804050	10803479	10803590	10803898	10804050	457	0.0343166	0.230031	0.043,0.024	0.054,0.049	-0.018	7372	ENSG00000170581.14	STAT2	chr12	-	56354418	56354614	56354458	56354614	56351291	56351450	0.157219	0.706593	1.0,0.0	0.345,1.0
32812	ENSG00000055917.16	PUM2	chr2	-	20331716	20331937	20327309	20327378	20350596	20350702	370	0.000872972	0.037507	0.461,0.413	0.668,1.0	-0.397		7491	ENSG00000172732.12	MUS81	chr11	+	65864719	65865323	65864719	65865145	65865219	65865323	223	0.0344404	0.230031	0.037,0.029	0.075,0.102	-0.055	939	ENSG00000261824.7	LINC00662	chr19	-	27746020	27746340	27746097	27746340	27732795	27732967	0.15817	0.708861	0.114,0.119	0.038,0.093
65955	ENSG00000176834.14	VSIG10	chr12	-	118102988	118103170	118095545	118095678	118103592	118103862	331	0.000872727	0.037507	0.0,1.0	1.0,1.0	-0.5		722	ENSG00000213339.9	QTRT1	chr19	+	10701949	10702254	10701949	10702018	10702115	10702254	246	0.0350432	0.233218	0.206,0.0	0.645,0.267	-0.353	2316	ENSG00000169744.13	LDB2	chr4	-	16508534	16508686	16508540	16508686	16505839	16505982	0.158156	0.708861	0.49,0.562	1.0,0.49
20215	ENSG00000144895.12	EIF2A	chr3	+	150558387	150558462	150552353	150552425	150562541	150562660	224	0.000875571	0.0375656	1.0,1.0	1.0,0.678	0.161		3980	ENSG00000147471.12	PLPBP	chr8	+	37765525	37765746	37765525	37765633	37765710	37765746	226	0.0350842	0.233218	0.0,0.18	0.152,0.231	-0.102	2933	ENSG00000168152.13	THAP9	chr4	+	82904735	82904941	82904735	82904931	82906323	82906627	0.15874	0.710414	0.19,0.238	0.0,0.0
2066	ENSG00000185917.14	SETD4	chr21	-	36048307	36048396	36045581	36046011	36053582	36053620	238	0.000891196	0.037847	0.484,0.556	1.0,1.0	-0.48		1760	ENSG00000021776.11	AQR	chr15	-	34873827	34874864	34873827	34873999	34874676	34874864	826	0.0352677	0.233475	0.235,0.202	0.474,0.37	-0.203	3117	ENSG00000171453.20	POLR1C	chr6	+	43519705	43519905	43519705	43519838	43520065	43520185	0.159987	0.714984	0.073,0.023	0.052,0.128
5599	ENSG00000198795.11	ZNF521	chr18	-	25345251	25345347	25327405	25327448	25350906	25350947	245	0.000884197	0.037847	0.378,1.0	0.0,0.288	0.545		2628	ENSG00000100897.18	DCAF11	chr14	+	24115381	24115726	24115381	24115392	24115542	24115726	299	0.0351866	0.233475	1.0,1.0	0.777,0.599	0.312	4778	ENSG00000186205.13	MTARC1	chr1	+	220797873	220798065	220797873	220798014	220805051	220805113	0.160511	0.716318	0.0,1.0	0.0,0.0
6091	ENSG00000214087.9	ARL16	chr17	-	81682490	81682675	81682033	81682149	81683012	81683126	334	0.000891411	0.037847	0.053,0.041	0.229,0.122	-0.129		4552	ENSG00000173531.15	MST1	chr3	-	49687148	49687478	49687148	49687285	49687363	49687478	227	0.0353342	0.233475	0.247,0.247	0.396,0.724	-0.313	3121	ENSG00000086848.15	ALG9	chr11	-	111870227	111870370	111870231	111870370	111868601	111868736	0.161078	0.717508	0.135,0.057	0.046,0.051
9646	ENSG00000047578.13	KATNIP	chr16	+	27654607	27654736	27648603	27648735	27677728	27677818	278	0.000892084	0.037847	0.484,0.573	0.728,1.0	-0.336		6299	ENSG00000174996.12	KLC2	chr11	+	66266432	66267859	66266432	66266490	66266872	66267859	531	0.0353706	0.233475	0.031,0.123	0.236,0.116	-0.099	4907	ENSG00000071054.16	MAP4K4	chr2	+	101887087	101887261	101887087	101887237	101887777	101887937	0.16123	0.717508	0.175,0.267	0.136,0.175
22818	ENSG00000182165.18	TP53TG1	chr7	-	87329934	87330094	87325114	87325444	87341522	87341684	309	0.000884765	0.037847	0.108,1.0	1.0,1.0	-0.446		8302	ENSG00000131966.14	ACTR10	chr14	+	58223621	58223856	58223621	58223701	58223782	58223856	230	0.035295	0.233475	0.092,0.178	0.0,0.105	0.083	5449	ENSG00000100445.18	SDR39U1	chr14	-	24442097	24442260	24442177	24442260	24440782	24440926	0.162092	0.720333	1.0,0.494	0.796,0.394
23723	ENSG00000148498.16	PARD3	chr10	-	34336198	34336243	34331116	34331344	34337277	34337426	194	0.00088759	0.037847	1.0,1.0	1.0,0.738	0.131		47	ENSG00000102038.16	SMARCA1	chrX	-	129480700	129481185	129480700	129480814	129481074	129481185	409	0.0357285	0.233532	0.026,0.019	0.064,0.035	-0.027	3744	ENSG00000284770.2	TBCE	chr1	+	235438768	235438926	235438768	235438922	235441813	235441882	0.164136	0.728396	0.0,0.0	0.106,0.0
43302	ENSG00000135541.22	AHI1	chr6	-	135495538	135495709	135492227	135492291	135495813	135495898	320	0.000887324	0.037847	0.383,0.189	0.0,0.072	0.25		1071	ENSG00000131470.15	PSMC3IP	chr17	-	42573477	42574210	42573477	42573623	42574098	42574210	624	0.0357172	0.233532	0.228,0.292	0.44,0.427	-0.173	3642	ENSG00000165959.12	CLMN	chr14	-	95194214	95194596	95194535	95194596	95193848	95193919	0.164673	0.729761	1.0,0.241	1.0,1.0
49112	ENSG00000122585.8	NPY	chr7	+	24289498	24289579	24285106	24285428	24291662	24291808	230	0.000891584	0.037847	1.0,1.0	0.618,1.0	0.191		3874	ENSG00000223960.7	CHROMR	chr2	+	178426365	178430889	178426365	178426505	178430677	178430889	4321	0.0357583	0.233532	1.0,1.0	0.519,1.0	0.24	362	ENSG00000214078.13	CPNE1	chr20	-	35626562	35626803	35626566	35626803	35626043	35626381	0.164931	0.729882	0.034,0.044	0.0,0.016
65108	ENSG00000174099.12	MSRB3	chr12	+	65306862	65307026	65278741	65278865	65308528	65308655	313	0.000895519	0.0379398	0.192,1.0	0.0,0.323	0.434		4420	ENSG00000196182.11	STK40	chr1	-	36339623	36343448	36339623	36341973	36343363	36343448	1539	0.0357756	0.233532	0.05,0.05	0.02,0.034	0.023	7601	ENSG00000122566.22	HNRNPA2B1	chr7	-	26196556	26197017	26196877	26197017	26196400	26196481	0.16556	0.731647	0.74,0.663	0.819,0.711
62671	ENSG00000166004.15	CEP295	chr11	+	93724253	93724375	93721953	93722050	93725650	93725831	271	0.000896994	0.0379495	1.0,1.0	0.544,1.0	0.228		5185	ENSG00000214063.11	TSPAN4	chr11	+	865512	865825	865512	865614	865693	865825	228	0.0357678	0.233532	0.085,0.059	0.148,0.225	-0.114	6674	ENSG00000140332.17	TLE3	chr15	-	70057458	70057658	70057473	70057658	70056297	70056374	0.1661	0.733011	0.251,0.359	0.0,0.383
12841	ENSG00000139428.12	MMAB	chr12	-	109561242	109561329	109561039	109561104	109561419	109561517	236	0.000906237	0.0382872	0.405,0.37	0.166,0.156	0.227		7125	ENSG00000165637.13	VDAC2	chr10	+	75219062	75219356	75219062	75219215	75219303	75219356	237	0.0357443	0.233532	0.031,0.011	0.055,0.022	-0.018	3322	ENSG00000130816.17	DNMT1	chr19	-	10137075	10137280	10137084	10137280	10136120	10136287	0.166616	0.734266	0.092,0.147	0.081,0.074
420	ENSG00000223546.7	LINC00630	chrX	+	102770351	102770420	102769157	102769341	102816991	102817082	218	0.000911036	0.0383303	0.468,1.0	1.0,1.0	-0.266		7382	ENSG00000213619.11	NDUFS3	chr11	+	47580834	47582468	47580834	47582213	47582348	47582468	284	0.0356451	0.233532	0.068,0.014	0.012,0.0	0.035	4536	ENSG00000088179.9	PTPN4	chr2	+	119915178	119916690	119915178	119915242	119920068	119920241	0.167702	0.738028	0.442,0.292	0.165,0.3
21032	ENSG00000008083.14	JARID2	chr6	+	15513238	15513422	15512914	15513045	15517160	15517268	333	0.00091035	0.0383303	0.729,0.0	1.0,1.0	-0.635		7630	ENSG00000172269.20	DPAGT1	chr11	-	119097141	119098487	119097141	119098043	119098402	119098487	508	0.0357153	0.233532	0.029,0.098	0.194,0.089	-0.078	1072	ENSG00000178999.13	AURKB	chr17	-	8207175	8207367	8207317	8207367	8206749	8206888	0.168044	0.738511	1.0,0.746	0.782,1.0
34455	ENSG00000220804.9	LINC01881	chr2	+	242130654	242130866	242122292	242122455	242138783	242138888	361	0.000910384	0.0383303	0.623,1.0	0.0,1.0	0.311		1177	ENSG00000175061.18	SNHG29	chr17	+	16439326	16439703	16439326	16439414	16439659	16439703	394	0.036147	0.235631	0.876,0.966	0.897,0.733	0.106	6787	ENSG00000203791.15	EEF1AKMT2	chr10	-	124789038	124789157	124789042	124789157	124774674	124774782	0.168542	0.739674	0.619,0.302	0.609,0.661
346	ENSG00000077279.20	DCX	chrX	-	111312638	111312736	111293778	111301743	111330918	111331041	247	0.000914519	0.0384237	0.969,0.91	0.764,0.784	0.165		2039	ENSG00000081760.17	AACS	chr12	+	125124704	125125024	125124704	125124769	125124901	125125024	281	0.0363817	0.235932	0.261,0.306	0.042,0.191	0.167	5829	ENSG00000168522.13	FNTA	chr8	+	43077215	43080441	43077215	43077364	43083117	43083180	0.169191	0.741494	0.241,0.191	0.214,0.143
25919	ENSG00000186951.16	PPARA	chr22	+	46176752	46176836	46151883	46151970	46198341	46198410	233	0.000919571	0.0385827	0.657,0.561	0.299,0.0	0.46		3667	ENSG00000064601.21	CTSA	chr20	+	45894993	45897806	45894993	45897040	45897716	45897806	825	0.0363008	0.235932	0.228,0.276	0.475,0.351	-0.161	4035	ENSG00000143390.18	RFX5	chr1	-	151346421	151346606	151346488	151346606	151346204	151346333	0.170402	0.744746	0.0,0.033	0.049,0.049
8284	ENSG00000005100.13	DHX33	chr17	-	5450806	5450934	5450202	5450406	5453579	5453668	277	0.000923182	0.0386276	0.879,0.95	1.0,1.0	-0.086		3812	ENSG00000109133.13	TMEM33	chr4	+	41935128	41935529	41935128	41935310	41935466	41935529	305	0.0363713	0.235932	0.867,1.0	1.0,0.971	-0.052	7685	ENSG00000092094.11	OSGEP	chr14	-	20448901	20449013	20448963	20449013	20448732	20448811	0.170293	0.744746	0.15,0.214	0.585,0.331
23569	ENSG00000138303.18	ASCC1	chr10	-	72128081	72128167	72096031	72097450	72133056	72133181	235	0.000922522	0.0386276	1.0,1.0	1.0,0.538	0.231		5110	ENSG00000234741.8	GAS5	chr1	-	173864256	173864506	173864256	173864304	173864483	173864506	328	0.0363935	0.235932	0.201,0.24	0.312,0.267	-0.069	4033	ENSG00000143390.18	RFX5	chr1	-	151346421	151346606	151346481	151346606	151346204	151346333	0.170964	0.746173	0.0,0.106	0.073,0.106
33772	ENSG00000026652.15	AGPAT4	chr6	-	161154148	161154310	161153345	161153499	161166247	161166417	311	0.000932417	0.0389604	0.831,0.881	1.0,1.0	-0.144		8123	ENSG00000122566.22	HNRNPA2B1	chr7	-	26190992	26193694	26190992	26192577	26193250	26193694	822	0.0366233	0.237096	0.329,0.355	0.424,0.597	-0.168	1283	ENSG00000079616.13	KIF22	chr16	+	29796892	29797093	29796892	29797088	29798373	29798501	0.172758	0.752968	0.0,0.011	0.032,0.032
39692	ENSG00000010244.19	ZNF207	chr17	+	32361467	32361515	32360891	32360967	32362913	32362984	197	0.000937557	0.0390679	0.94,0.943	0.968,0.986	-0.035		3607	ENSG00000156508.19	EEF1A1	chr6	-	73518931	73519516	73518931	73519228	73519336	73519516	257	0.0368285	0.238097	0.035,0.032	0.044,0.042	-0.009	3980	ENSG00000069702.11	TGFBR3	chr1	-	91885877	91886151	91886029	91886151	91861470	91861644	0.173304	0.754313	1.0,1.0	0.198,1.0
63889	ENSG00000163875.16	MEAF6	chr1	-	37496706	37496736	37495884	37495918	37501803	37501996	179	0.000936688	0.0390679	0.252,0.281	0.158,0.036	0.17		1807	ENSG00000185507.21	IRF7	chr11	-	615096	615647	615096	615259	615344	615647	234	0.0370276	0.239056	0.389,0.389	0.793,0.761	-0.388	714	ENSG00000175221.15	MED16	chr19	-	868410	868499	868415	868499	867962	868251	0.17475	0.75749	0.0,0.492	0.592,0.244
37709	ENSG00000174501.14	ANKRD36C	chr2	-	95867439	95867581	95859860	95860074	95876438	95876509	291	0.000942784	0.0392319	0.746,0.804	1.0,1.0	-0.225		4476	ENSG00000132323.9	ILKAP	chr2	-	238194274	238194870	238194274	238194331	238194804	238194870	622	0.0372178	0.239955	0.138,0.12	0.401,0.205	-0.174	5966	ENSG00000175215.11	CTDSP2	chr12	-	57827533	57827590	57827551	57827590	57826995	57827097	0.174485	0.75749	0.063,0.104	0.124,0.106
10099	ENSG00000103351.13	CLUAP1	chr16	+	3533098	3533155	3532785	3532841	3536121	3536559	206	0.000945128	0.0392757	0.153,0.048	0.0,0.038	0.082		4471	ENSG00000198258.11	UBL5	chr19	+	9828326	9828675	9828326	9828389	9828591	9828675	351	0.0373086	0.240212	0.56,0.773	0.459,1.0	-0.063	7868	ENSG00000126214.21	KLC1	chr14	+	103679383	103679545	103679383	103679518	103700654	103700727	0.174679	0.75749	0.297,0.394	0.559,0.404
23209	ENSG00000130402.13	ACTN4	chr19	+	38710256	38710342	38709394	38709476	38711275	38711361	235	0.00094749	0.0393202	0.177,0.138	0.065,0.095	0.077		2131	ENSG00000090097.22	PCBP4	chr3	-	51959894	51960320	51959894	51960023	51960188	51960320	314	0.0373876	0.240393	0.032,0.021	0.0,0.02	0.017	3048	ENSG00000241468.8	ATP5MF	chr7	-	99466110	99466167	99466128	99466167	99460085	99460193	0.175596	0.760116	0.352,0.175	0.229,0.1
35668	ENSG00000070081.17	NUCB2	chr11	+	17315385	17315475	17312027	17312120	17330126	17330297	239	0.000955453	0.0395966	0.639,1.0	1.0,1.0	-0.18		2250	ENSG00000141698.17	NT5C3B	chr17	-	41835587	41835957	41835587	41835682	41835858	41835957	325	0.0374747	0.240624	0.379,0.407	0.133,0.133	0.26	1521	ENSG00000137822.13	TUBGCP4	chr15	+	43403682	43403842	43403682	43403799	43404412	43404552	0.177334	0.766594	0.246,0.134	0.143,0.115
30348	ENSG00000186174.13	BCL9L	chr11	-	118909913	118910015	118908269	118908655	118925237	118925926	251	0.000963253	0.0398152	0.129,0.069	0.372,0.543	-0.359		7859	ENSG00000170581.14	STAT2	chr12	-	56350096	56350432	56350096	56350190	56350411	56350432	370	0.0378498	0.242702	0.112,0.0	0.204,0.103	-0.098	7155	ENSG00000117523.17	PRRC2C	chr1	+	171514535	171514645	171514535	171514630	171515733	171515859	0.178745	0.771643	0.804,0.709	0.886,0.769
36795	ENSG00000139624.14	CERS5	chr12	-	50142052	50142110	50138566	50138617	50143073	50143204	207	0.000963344	0.0398152	0.793,0.683	1.0,1.0	-0.262		163	ENSG00000100288.20	CHKB	chr22	-	50580189	50580416	50580189	50580271	50580357	50580416	235	0.0380433	0.243612	0.458,0.403	0.634,0.584	-0.178	750	ENSG00000267374.2	MIR924HG	chr18	-	39233108	39233530	39233402	39233530	39206916	39208789	0.180029	0.776131	1.0,0.252	1.0,1.0
32266	ENSG00000182389.20	CACNB4	chr2	-	151860710	151860820	151854851	151855375	151870530	151870611	259	0.0009698	0.0399734	0.0,0.535	1.0,0.721	-0.593		2241	ENSG00000164172.20	MOCS2	chr5	-	53100410	53101509	53100410	53100534	53101358	53101509	973	0.0382173	0.244394	0.042,0.023	0.0,0.0	0.033	3258	ENSG00000169855.20	ROBO1	chr3	-	78668471	78668565	78668483	78668565	78668133	78668302	0.180335	0.776397	0.052,0.017	0.019,0.015
32679	ENSG00000106070.20	GRB10	chr7	-	50727792	50727890	50703820	50703908	50732271	50732368	247	0.000968643	0.0399734	0.376,0.205	0.0,0.0	0.29		4750	ENSG00000166482.12	MFAP4	chr17	-	19385098	19385454	19385098	19385281	19385357	19385454	225	0.0383819	0.245114	1.0,0.249	0.398,1.0	-0.075	865	ENSG00000256525.8	POLG2	chr17	-	64483963	64485868	64485727	64485868	64482918	64482999	0.180602	0.776492	0.833,0.609	0.7,0.369
64297	ENSG00000125814.17	NAPB	chr20	-	23395138	23395185	23394921	23394999	23402992	23403072	196	0.000974937	0.0401307	0.695,0.275	0.0,0.0	0.485		1829	ENSG00000149131.17	SERPING1	chr11	+	57606009	57606547	57606009	57606213	57606407	57606547	343	0.0384958	0.245202	0.013,0.015	0.038,0.028	-0.019	2341	ENSG00000163702.20	IL17RC	chr3	+	9923880	9924137	9923880	9924020	9924231	9924291	0.1812	0.777659	0.0,0.0	0.0,0.359
1142	ENSG00000100416.15	TRMU	chr22	+	46355989	46356072	46353516	46355588	46356841	46356979	232	0.000983661	0.0403261	0.72,0.391	1.0,1.0	-0.445		5754	ENSG00000060971.19	ACAA1	chr3	-	38126161	38126700	38126161	38126341	38126509	38126700	317	0.0384998	0.245202	0.212,0.385	0.523,0.738	-0.332	3388	ENSG00000117598.13	PLPPR5	chr1	-	98914785	98914920	98914800	98914920	98890244	98893104	0.181364	0.777659	0.232,1.0	1.0,0.0
24179	ENSG00000113716.13	HMGXB3	chr5	+	150010110	150010608	150006472	150006647	150012254	150012353	647	0.000983372	0.0403261	0.951,1.0	0.929,0.772	0.125		5174	ENSG00000115282.21	TTC31	chr2	+	74492003	74494559	74492003	74492055	74492138	74494559	232	0.0387791	0.246484	0.114,0.149	0.318,0.325	-0.19	2998	ENSG00000124120.11	TTPAL	chr20	+	44484336	44484530	44484336	44484428	44486595	44486706	0.18167	0.777922	0.813,1.0	1.0,1.0
63520	ENSG00000151067.23	CACNA1C	chr12	+	2648474	2648507	2634296	2634380	2651639	2651747	182	0.0009821	0.0403261	0.29,0.551	0.0,0.0	0.42		6349	ENSG00000164896.20	FASTK	chr7	-	151077100	151077401	151077100	151077236	151077309	151077401	222	0.0388056	0.246484	0.747,0.74	0.34,0.653	0.247	5130	ENSG00000204356.14	NELFE	chr6	-	31958307	31958454	31958371	31958454	31956940	31957010	0.182454	0.779174	0.104,0.318	0.0,0.065
60505	ENSG00000110713.17	NUP98	chr11	-	3685972	3686194	3683199	3683441	3691346	3691489	371	0.000985707	0.0403556	0.934,1.0	0.755,0.858	0.161		1337	ENSG00000157353.17	FCSK	chr16	+	70478550	70479403	70478550	70478650	70479179	70479403	678	0.0390184	0.247377	0.637,1.0	0.099,1.0	0.269	5951	ENSG00000147180.17	ZNF711	chrX	+	85246929	85247188	85246929	85247183	85247546	85247651	0.182452	0.779174	1.0,0.326	0.0,0.139
41628	ENSG00000120008.16	WDR11	chr10	+	120867065	120867169	120866568	120866764	120871169	120871346	253	0.000987368	0.0403693	0.898,0.746	1.0,0.967	-0.161		8378	ENSG00000225746.13	MEG8	chr14	+	100959801	100961132	100959801	100960219	100961026	100961132	956	0.0390513	0.247377	1.0,1.0	0.497,1.0	0.252	7156	ENSG00000117523.17	PRRC2C	chr1	+	171584418	171584541	171584418	171584526	171587002	171587221	0.1838	0.783867	0.183,0.22	0.213,0.125
348	ENSG00000077279.20	DCX	chrX	-	111312641	111312736	111293778	111301743	111330918	111331041	244	0.000990559	0.0404454	0.966,0.907	0.739,0.781	0.176		689	ENSG00000105135.16	ILVBL	chr19	-	15122692	15123030	15122692	15122804	15122891	15123030	236	0.0392933	0.248576	0.558,0.321	0.24,0.112	0.264	629	ENSG00000011243.19	AKAP8L	chr19	-	15398629	15399410	15399301	15399410	15397713	15397855	0.184375	0.785262	0.498,0.555	0.64,0.565
51661	ENSG00000157764.14	BRAF	chr7	-	140808236	140808316	140807959	140808062	140808891	140808995	229	0.000992734	0.0404799	0.286,0.342	0.061,0.098	0.234		2475	ENSG00000118762.8	PKD2	chr4	+	88065373	88065879	88065373	88065495	88065761	88065879	415	0.0394127	0.248664	0.305,0.324	0.193,0.129	0.153	6389	ENSG00000156345.18	CDK20	chr9	-	87970567	87970897	87970775	87970897	87969795	87969919	0.185548	0.788145	0.511,0.697	1.0,0.556
55870	ENSG00000165304.8	MELK	chr9	+	36597221	36597290	36589535	36589652	36599393	36599486	218	0.000994968	0.0405166	0.545,0.381	0.774,1.0	-0.424		7501	ENSG00000174483.20	BBS1	chr11	+	66515692	66515933	66515692	66515731	66515860	66515933	278	0.0393825	0.248664	0.211,0.177	0.401,0.573	-0.293	7892	ENSG00000224078.15	SNHG14	chr15	+	25053827	25054866	25053827	25053967	25055078	25055230	0.185379	0.788145	0.61,1.0	1.0,0.46
1405	ENSG00000100379.17	KCTD17	chr22	+	37060822	37060922	37059312	37059438	37061538	37061564	249	0.00100421	0.0407321	1.0,0.749	0.545,0.374	0.415		7368	ENSG00000110497.15	AMBRA1	chr11	-	46541944	46543398	46541944	46542981	46543251	46543398	419	0.03962	0.249638	0.693,0.426	0.721,0.895	-0.249	891	ENSG00000108387.16	SEPTIN4	chr17	-	58526766	58526978	58526931	58526978	58526219	58526313	0.185859	0.788408	0.74,1.0	1.0,0.192
2826	ENSG00000000419.14	DPM1	chr20	-	50940864	50940955	50935441	50936262	50942030	50942126	240	0.00100428	0.0407321	0.482,0.736	0.756,1.0	-0.269		3915	ENSG00000117569.19	PTBP2	chr1	+	96804799	96806452	96804799	96804939	96806418	96806452	1628	0.0397023	0.249823	0.276,0.284	0.359,0.362	-0.08	2124	ENSG00000196504.19	PRPF40A	chr2	-	152717229	152717457	152717355	152717457	152715994	152716126	0.186131	0.788511	0.275,0.209	0.169,0.172
38074	ENSG00000106278.12	PTPRZ1	chr7	+	122012077	122013889	122010333	122011309	122019123	122019268	1961	0.00100208	0.0407321	0.923,0.938	0.865,0.858	0.069		2834	ENSG00000161960.16	EIF4A1	chr17	+	7577826	7578244	7577826	7577916	7578164	7578244	397	0.0401008	0.25185	0.015,0.019	0.023,0.032	-0.01	5062	ENSG00000255857.6	PXN-AS1	chr12	+	120206544	120206712	120206544	120206621	120209838	120209934	0.188706	0.798352	0.0,0.0	0.081,0.237
48832	ENSG00000005801.18	ZNF195	chr11	-	3360719	3360788	3357926	3360565	3361742	3361889	218	0.00100989	0.0409051	0.0,0.0	0.281,0.186	-0.234		4069	ENSG00000284770.2	TBCE	chr1	+	235435744	235436608	235435744	235435840	235436385	235436608	694	0.0401314	0.25185	0.436,0.157	0.097,0.125	0.185	6483	ENSG00000160408.16	ST6GALNAC6	chr9	-	127897825	127898010	127897955	127898010	127896241	127896332	0.190528	0.804988	0.0,0.348	0.211,0.348
30915	ENSG00000117016.10	RIMS3	chr1	-	40641708	40641956	40635915	40636057	40647667	40647762	397	0.00101202	0.0409371	0.724,0.824	1.0,1.0	-0.226		238	ENSG00000161179.14	YDJC	chr22	-	21629009	21629761	21629009	21629407	21629601	21629761	343	0.0401974	0.251929	0.827,1.0	0.367,1.0	0.23	2306	ENSG00000169045.17	HNRNPH1	chr5	-	179616868	179616958	179616898	179616958	179616125	179616218	0.190895	0.805467	0.833,0.92	0.88,0.744
2289	ENSG00000026036.22	RTEL1-TNFRSF6B	chr20	+	63680663	63680719	63679848	63679946	63685522	63685597	205	0.00101473	0.0409922	1.0,1.0	0.686,0.853	0.23		5208	ENSG00000049759.20	NEDD4L	chr18	+	58383245	58385586	58383245	58383319	58385525	58385586	2355	0.0402882	0.252162	1.0,0.286	0.078,0.202	0.503	1000	ENSG00000274211.6	SOCS7	chr17	+	38365307	38366033	38365307	38365409	38366286	38366417	0.191205	0.8057	0.109,0.076	0.162,1.0
1729	ENSG00000286129.1	CH17-264L24.2	chr22	+	22306832	22307021	22303942	22304114	22307105	22307245	338	0.00101787	0.0410101	1.0,1.0	0.945,0.795	0.13		3142	ENSG00000186470.14	BTN3A2	chr6	+	26367989	26368267	26367989	26368050	26368177	26368267	276	0.0406219	0.253577	0.0,0.072	0.0,0.519	-0.224	4927	ENSG00000163703.20	CRELD1	chr3	+	9943076	9943229	9943076	9943172	9943380	9943515	0.192101	0.806264	0.325,0.153	0.224,0.0
12228	ENSG00000146426.19	TIAM2	chr6	+	154860737	154860998	154832696	154833409	154944115	154944206	410	0.00101761	0.0410101	0.195,0.784	1.0,0.845	-0.433		5199	ENSG00000166340.18	TPP1	chr11	-	6616974	6617428	6616974	6617153	6617358	6617428	354	0.0406205	0.253577	1.0,0.771	1.0,1.0	-0.115	5162	ENSG00000115694.15	STK25	chr2	-	241501477	241501698	241501527	241501698	241500739	241500796	0.191967	0.806264	0.988,1.0	0.911,1.0
59698	ENSG00000107521.20	HPS1	chr10	-	98429790	98429889	98429150	98429642	98430570	98430670	248	0.00102108	0.0410848	0.231,0.0	0.474,1.0	-0.621		683	ENSG00000011243.19	AKAP8L	chr19	-	15403474	15403715	15403474	15403555	15403657	15403715	251	0.0408279	0.25362	0.908,0.922	0.954,0.982	-0.053	5826	ENSG00000140694.17	PARN	chr16	-	14591912	14593378	14593300	14593378	14586317	14586361	0.191926	0.806264	0.118,0.095	0.093,0.055
7054	ENSG00000186868.17	MAPT	chr17	+	45982865	45983930	45978374	45978440	45987039	45987095	1214	0.0010309	0.0412074	0.012,0.005	0.058,0.525	-0.283		2183	ENSG00000178719.17	GRINA	chr8	+	143991691	143992373	143991691	143991804	143991877	143992373	222	0.040844	0.25362	0.201,0.118	0.251,0.0	0.034	562	ENSG00000130669.17	PAK4	chr19	+	39168229	39168312	39168229	39168302	39169531	39169757	0.194226	0.810916	0.176,0.332	0.428,0.385
9888	ENSG00000183426.17	NPIPA1	chr16	+	14950751	14950821	14950219	14950255	14951614	14952060	219	0.00102823	0.0412074	0.327,0.185	0.0,0.078	0.217		3243	ENSG00000160972.10	PPP1R16A	chr8	+	144500266	144500612	144500266	144500391	144500486	144500612	244	0.0407205	0.25362	0.304,0.149	0.504,0.494	-0.273	1704	ENSG00000111247.15	RAD51AP1	chr12	+	4543762	4543911	4543762	4543904	4546308	4546418	0.194073	0.810916	0.207,0.137	0.152,0.053
23607	ENSG00000124588.22	NQO2	chr6	+	3004494	3004651	2999988	3000085	3006467	3006559	306	0.00102981	0.0412074	0.109,0.196	0.0,0.0	0.152		6838	ENSG00000166987.15	MBD6	chr12	+	57524028	57524416	57524028	57524092	57524279	57524416	336	0.0407657	0.25362	0.198,0.8	0.83,0.727	-0.279	2963	ENSG00000130414.13	NDUFA10	chr2	-	240014694	240014860	240014738	240014860	240011616	240011696	0.194429	0.810916	0.121,0.096	0.047,0.072
56012	ENSG00000125354.24	SEPTIN6	chrX	-	119625334	119625379	119618712	119618786	119629317	119629508	194	0.00102883	0.0412074	0.113,0.065	0.0,0.0	0.089		2354	ENSG00000090621.15	PABPC4	chr1	-	39562322	39564542	39562322	39563922	39564422	39564542	649	0.0408993	0.253629	0.061,0.052	0.086,0.117	-0.045	7552	ENSG00000165533.19	TTC8	chr14	+	88841036	88841514	88841036	88841196	88843805	88843850	0.194487	0.810916	0.444,0.277	0.0,0.242
61125	ENSG00000149100.13	EIF3M	chr11	+	32588593	32588732	32583797	32583929	32589546	32589641	288	0.00102658	0.0412074	0.341,0.206	0.0,0.0	0.274		1213	ENSG00000170037.14	CNTROB	chr17	+	7948486	7949137	7948486	7948619	7949084	7949137	614	0.0410876	0.254128	0.156,0.371	0.096,0.122	0.155	7574	ENSG00000181789.14	COPG1	chr3	+	129250681	129250894	129250681	129250734	129252280	129252361	0.193646	0.810916	0.02,0.015	0.008,0.012
36519	ENSG00000198399.15	ITSN2	chr2	-	24284762	24284843	24275712	24275849	24286211	24286351	230	0.00103537	0.0413319	0.0,0.115	0.245,0.564	-0.347		3635	ENSG00000143126.8	CELSR2	chr1	+	109271216	109271722	109271216	109271296	109271385	109271722	238	0.0410375	0.254128	0.003,0.008	0.019,0.02	-0.014	3439	ENSG00000188352.12	FOCAD	chr9	+	20820940	20821071	20820940	20821061	20822988	20823115	0.195017	0.81206	0.853,1.0	0.976,0.952
62059	ENSG00000117114.20	ADGRL2	chr1	+	81987259	81987341	81985258	81985355	81990390	81992180	231	0.00104328	0.0415932	0.097,0.272	0.018,0.059	0.146		4024	ENSG00000174080.12	CTSF	chr11	-	66564087	66564648	66564087	66564146	66564557	66564648	560	0.0411721	0.254152	0.444,0.21	1.0,1.0	-0.673	83	ENSG00000182518.13	FAM104B	chrX	-	55159125	55159228	55159128	55159228	55146180	55146311	0.196145	0.814351	0.0,0.37	0.0,0.07
17918	ENSG00000102710.20	SUPT20H	chr13	-	37048563	37048599	37047877	37047936	37051487	37051559	185	0.00104643	0.0416354	0.974,0.911	0.722,0.819	0.172		8268	ENSG00000100167.20	SEPTIN3	chr22	+	41994620	41998221	41994620	41994714	41996901	41998221	2336	0.0411993	0.254152	0.844,0.775	0.966,0.852	-0.1	210	ENSG00000100038.20	TOP3B	chr22	-	21975904	21976187	21975980	21976187	21975639	21975807	0.196807	0.814351	0.665,0.768	0.713,1.0
64505	ENSG00000161813.22	LARP4	chr12	+	50412404	50412453	50402674	50402813	50427761	50427909	198	0.00104708	0.0416354	0.429,0.201	0.601,1.0	-0.485		3872	ENSG00000113240.13	CLK4	chr5	-	178616881	178618778	178616881	178616948	178618555	178618778	1756	0.0413852	0.254965	0.565,1.0	1.0,1.0	-0.218	4514	ENSG00000033867.16	SLC4A7	chr3	-	27484066	27484347	27484078	27484347	27452416	27452498	0.196875	0.814351	0.144,0.0	0.039,0.156
2410	ENSG00000124222.22	STX16	chr20	+	58667200	58667318	58659622	58659634	58667489	58667597	267	0.00104958	0.0416805	0.069,0.094	0.0,0.0	0.082		4882	ENSG00000075702.19	WDR62	chr19	+	36101213	36102151	36101213	36101317	36102013	36102151	845	0.041498	0.255326	1.0,0.514	1.0,1.0	-0.243	5059	ENSG00000136935.14	GOLGA1	chr9	-	124921711	124921892	124921722	124921892	124921128	124921240	0.196837	0.814351	0.072,1.0	0.21,0.411
60748	ENSG00000166444.19	DENND2B	chr11	-	8831555	8831688	8811246	8811335	8839309	8839350	282	0.00106111	0.0420834	0.392,0.159	0.0,0.07	0.241		1270	ENSG00000266964.6	FXYD1	chr19	+	35142719	35143050	35142719	35142771	35142916	35143050	294	0.0415943	0.255543	0.101,0.336	0.0,0.112	0.163	6757	ENSG00000187391.22	MAGI2	chr7	-	78194873	78195063	78194879	78195063	78185628	78185670	0.197107	0.814351	0.871,0.743	0.794,0.658
7552	ENSG00000006042.12	TMEM98	chr17	+	32931326	32931402	32928152	32928237	32931474	32931659	225	0.00106749	0.0422374	1.0,0.964	0.829,0.817	0.159		7792	ENSG00000111077.18	TNS2	chr12	+	53060674	53061264	53060674	53060759	53060848	53061264	238	0.0416417	0.255543	1.0,0.775	1.0,1.0	-0.113	7401	ENSG00000173230.15	GOLGB1	chr3	-	121669196	121669355	121669211	121669355	121668060	121668158	0.196424	0.814351	0.426,0.353	0.312,0.232
18105	ENSG00000072849.11	DERL2	chr17	-	5481295	5481389	5480386	5480582	5482808	5482879	243	0.00106777	0.0422374	0.688,0.931	1.0,0.957	-0.169		4483	ENSG00000088038.19	CNOT3	chr19	+	54143659	54144134	54143659	54143749	54144005	54144134	405	0.0420457	0.257687	0.109,0.055	0.022,0.0	0.071	2752	ENSG00000178149.17	DALRD3	chr3	-	49015803	49015872	49015818	49015872	49015487	49015707	0.198427	0.818736	0.292,0.761	0.803,0.661
2111	ENSG00000159082.18	SYNJ1	chr21	-	32676331	32676355	32673339	32673531	32678644	32678801	173	0.00107478	0.0423705	0.256,1.0	0.0,0.0	0.628		770	ENSG00000077463.15	SIRT6	chr19	-	4175027	4175937	4175027	4175760	4175841	4175937	230	0.0422259	0.258014	0.0,0.0	0.115,1.0	-0.557	4565	ENSG00000143702.16	CEP170	chr1	-	243185778	243186422	243186258	243186422	243172696	243172846	0.199017	0.820107	0.655,0.662	0.666,0.478
7788	ENSG00000233098.9	CCDC144NL-AS1	chr17	+	20887591	20887849	20868432	20868685	20892229	20892432	407	0.00107305	0.0423705	0.48,0.423	0.255,0.212	0.218		1691	ENSG00000174444.15	RPL4	chr15	-	66503057	66503529	66503057	66503164	66503357	66503529	342	0.0422058	0.258014	0.027,0.042	0.023,0.011	0.018	252	ENSG00000182093.16	GET1	chr21	+	39390697	39391476	39390697	39390863	39391768	39391836	0.199676	0.821104	0.04,0.048	0.026,0.034
48783	ENSG00000149923.14	PPP4C	chr16	+	30081199	30081310	30076314	30076475	30082483	30082534	260	0.00107531	0.0423705	0.462,0.721	1.0,1.0	-0.408		7240	ENSG00000177595.19	PIDD1	chr11	-	799814	800244	799814	800014	800130	800244	265	0.0422633	0.258014	1.0,1.0	0.0,1.0	0.5	2180	ENSG00000072310.18	SREBF1	chr17	-	17819537	17819725	17819543	17819725	17819319	17819454	0.200036	0.821104	1.0,0.857	1.0,1.0
63785	ENSG00000139083.11	ETV6	chr12	+	11752449	11752579	11649673	11650160	11839139	11839304	279	0.00107928	0.0424717	0.863,0.926	1.0,1.0	-0.105		2459	ENSG00000124357.13	NAGK	chr2	+	71072640	71073594	71072640	71072751	71073481	71073594	879	0.0424773	0.258985	0.275,0.266	0.427,0.404	-0.145	7866	ENSG00000126214.21	KLC1	chr14	+	103679383	103679545	103679383	103679518	103684985	103685036	0.199883	0.821104	0.481,0.372	0.524,0.575
63920	ENSG00000052126.15	PLEKHA5	chr12	+	19290676	19290796	19287472	19287556	19320561	19320585	269	0.0010813	0.0424964	0.326,0.0	0.0,0.0	0.163		2268	ENSG00000130332.15	LSM7	chr19	-	2328386	2328586	2328386	2328477	2328560	2328586	232	0.0425766	0.259255	0.055,0.138	0.0,0.044	0.075	1635	ENSG00000112655.16	PTK7	chr6	+	43142171	43143620	43142171	43142299	43144450	43144606	0.201508	0.823459	0.863,0.924	0.929,0.959
5106	ENSG00000166377.20	ATP9B	chr18	+	79372824	79372882	79359353	79359462	79373897	79374027	207	0.00108863	0.0427291	0.613,0.683	0.852,1.0	-0.278		7602	ENSG00000182809.11	CRIP2	chr14	+	105479124	105479493	105479124	105479219	105479435	105479493	365	0.0427504	0.259977	0.124,0.059	0.082,0.0	0.05	2889	ENSG00000133226.17	SRRM1	chr1	+	24654854	24655129	24654854	24655123	24660718	24660799	0.201482	0.823459	0.779,0.802	0.77,0.684
61215	ENSG00000135362.14	PRR5L	chr11	+	36393845	36394011	36376380	36376704	36400996	36401264	315	0.00109596	0.0429614	0.356,1.0	1.0,1.0	-0.322		2509	ENSG00000011143.19	MKS1	chr17	-	58213764	58216243	58213764	58213869	58214258	58216243	538	0.0428707	0.260373	0.195,0.027	0.044,0.052	0.063	2934	ENSG00000092096.18	SLC22A17	chr14	-	23347459	23347731	23347513	23347731	23347100	23347212	0.201647	0.823459	0.179,0.15	0.218,0.268
30959	ENSG00000033627.17	ATP6V0A1	chr17	+	42470089	42470218	42468009	42468107	42477659	42477742	278	0.00109746	0.0429649	0.811,0.874	1.0,1.0	-0.157		271	ENSG00000197381.17	ADARB1	chr21	+	45222017	45226560	45222017	45223577	45225546	45226560	2118	0.0429892	0.260422	1.0,0.545	1.0,1.0	-0.228	3893	ENSG00000196781.16	TLE1	chr9	-	81613376	81613521	81613421	81613521	81611842	81611956	0.201645	0.823459	0.852,1.0	0.856,1.0
51273	ENSG00000162104.10	ADCY9	chr16	-	4007367	4007558	3993348	3993510	4113749	4114026	340	0.00109926	0.0429799	1.0,0.687	0.568,0.305	0.407		6973	ENSG00000095321.18	CRAT	chr9	-	129102399	129103066	129102399	129102565	129103012	129103066	596	0.0429699	0.260422	0.429,1.0	0.143,0.2	0.543	299	ENSG00000102125.16	TAZ	chrX	+	154413206	154413358	154413206	154413252	154413481	154413567	0.204606	0.834116	0.539,0.226	0.539,0.7
45030	ENSG00000089159.17	PXN	chr12	-	120226838	120227117	120224153	120224377	120265616	120265692	428	0.00110514	0.0431545	0.582,0.258	0.042,0.0	0.399		8390	ENSG00000142208.18	AKT1	chr14	-	104773454	104773980	104773454	104773580	104773911	104773980	480	0.0432105	0.261426	0.06,0.038	0.092,0.092	-0.043	2066	ENSG00000110881.12	ASIC1	chr12	+	50080497	50080727	50080497	50080589	50081101	50081181	0.204783	0.834116	0.293,0.0	0.645,0.206
11449	ENSG00000092439.16	TRPM7	chr15	-	50628148	50628249	50624165	50624300	50631416	50631489	250	0.00111108	0.0432753	0.749,0.807	1.0,1.0	-0.222		590	ENSG00000167645.17	YIF1B	chr19	-	38309223	38309643	38309223	38309328	38309404	38309643	225	0.0433769	0.262097	0.0,0.099	0.0,0.0	0.05	1214	ENSG00000103005.12	USB1	chr16	+	58001406	58001588	58001406	58001581	58002478	58002645	0.206528	0.840146	0.087,0.137	0.0,0.0
57364	ENSG00000280987.4	MATR3	chr5	+	139293452	139293575	139279050	139279129	139314674	139314736	272	0.00111042	0.0432753	0.451,0.451	0.154,0.0	0.374		1449	ENSG00000168488.19	ATXN2L	chr16	+	28835277	28835758	28835277	28835399	28835548	28835758	298	0.0434969	0.262485	0.027,0.016	0.012,0.005	0.013	6051	ENSG00000023287.13	RB1CC1	chr8	-	52628031	52628168	52628040	52628168	52624716	52624787	0.206895	0.840562	0.485,0.295	0.509,0.688
26195	ENSG00000162585.17	FAAP20	chr1	-	2192844	2192975	2189712	2189781	2193638	2193910	280	0.0011173	0.0434619	0.018,0.025	0.06,0.113	-0.065		1969	ENSG00000107937.19	GTPBP4	chr10	+	996105	997308	996105	996242	997207	997308	1114	0.0435959	0.262746	0.169,0.131	0.066,0.1	0.067	297	ENSG00000102125.16	TAZ	chrX	+	154413206	154413339	154413206	154413252	154413481	154413567	0.213407	0.846289	0.544,0.174	0.532,0.654
4472	ENSG00000214046.9	SMIM7	chr19	-	16654034	16654125	16646147	16647261	16659394	16659447	240	0.00113349	0.0440179	0.836,0.81	0.644,0.708	0.147		2529	ENSG00000174233.12	ADCY6	chr12	-	48770765	48771973	48770765	48770970	48771709	48771973	888	0.0436519	0.262747	0.019,0.024	0.039,0.112	-0.054	408	ENSG00000101365.21	IDH3B	chr20	-	2658637	2658837	2658758	2658837	2658394	2658522	0.209615	0.846289	0.688,0.436	0.794,0.688
42780	ENSG00000227671.4	ZNF731P	chr1	-	247202015	247202095	247200066	247200193	247210690	247210856	229	0.00113449	0.0440179	0.0,1.0	1.0,0.661	-0.331		3199	ENSG00000177239.16	MAN1B1	chr9	+	137101483	137106315	137101483	137105916	137106124	137106315	357	0.0439152	0.263659	0.511,0.854	1.0,1.0	-0.318	1298	ENSG00000103365.15	GGA2	chr16	-	23495688	23495778	23495693	23495778	23494302	23494378	0.210307	0.846289	0.139,0.069	0.108,0.0
29693	ENSG00000078177.14	N4BP2	chr4	+	40100035	40100126	40056912	40057030	40102074	40103218	240	0.00113622	0.0440289	1.0,1.0	0.341,1.0	0.33		3666	ENSG00000064601.21	CTSA	chr20	+	45894993	45897040	45894993	45895133	45896964	45897040	1980	0.043913	0.263659	0.08,0.068	0.113,0.134	-0.049	1485	ENSG00000140416.23	TPM1	chr15	+	63043705	63044152	63043705	63043831	63056984	63057118	0.211961	0.846289	0.959,0.989	1.0,1.0
34050	ENSG00000155850.8	SLC26A2	chr5	+	149961992	149962272	149960784	149960979	149977627	149977722	429	0.00114257	0.0442187	0.327,0.0	0.019,0.0	0.154		5076	ENSG00000115355.17	CCDC88A	chr2	-	55295596	55296056	55295596	55295727	55295949	55296056	371	0.0440945	0.264399	0.911,0.97	0.972,0.984	-0.037	2163	ENSG00000186298.12	PPP1CC	chr12	-	110722471	110722695	110722623	110722695	110722134	110722269	0.214416	0.846289	0.932,0.952	0.978,0.955
10086	ENSG00000005339.15	CREBBP	chr16	-	3850296	3851009	3810602	3810779	3879831	3880120	862	0.00115441	0.04462	0.944,0.94	0.987,1.0	-0.052		1571	ENSG00000103253.19	HAGHL	chr16	+	728315	728604	728315	728424	728503	728604	228	0.0443144	0.265379	1.0,1.0	0.466,1.0	0.267	2333	ENSG00000197345.13	MRPL21	chr11	-	68896468	68896678	68896514	68896678	68893402	68893455	0.213351	0.846289	0.041,0.028	0.062,0.074
33905	ENSG00000144455.14	SUMF1	chr3	-	4376329	4376389	4361145	4362254	4410864	4410978	209	0.00116749	0.0449544	1.0,0.704	1.0,1.0	-0.148		2616	ENSG00000247708.8	STX18-AS1	chr4	+	4648976	4649542	4648976	4649109	4649369	4649542	409	0.0446574	0.266427	1.0,0.593	1.0,0.327	0.133	2536	ENSG00000156983.17	BRPF1	chr3	+	9742024	9742541	9742024	9742153	9742943	9743253	0.214305	0.846289	0.258,0.137	0.065,0.156
36788	ENSG00000139624.14	CERS5	chr12	-	50132961	50133064	50129791	50130694	50134545	50134702	252	0.00116478	0.0449544	0.09,0.273	0.0,0.051	0.156		5905	ENSG00000165458.14	INPPL1	chr11	+	72233440	72233744	72233440	72233522	72233654	72233744	281	0.0446589	0.266427	0.028,0.037	0.08,0.06	-0.038	2684	ENSG00000106397.12	PLOD3	chr7	-	101211540	101211716	101211590	101211716	101210531	101210673	0.210438	0.846289	0.034,0.13	0.272,0.0
52972	ENSG00000070501.12	POLB	chr8	+	42352518	42352568	42344959	42345019	42355515	42355567	199	0.00116731	0.0449544	0.789,0.428	1.0,1.0	-0.391		6835	ENSG00000276462.2	BX255923.3	chr9	-	41102730	41105159	41102730	41102841	41104467	41105159	1775	0.0446362	0.266427	1.0,1.0	1.0,0.0	0.5	3127	ENSG00000110514.19	MADD	chr11	+	47295495	47295579	47295495	47295576	47295896	47296055	0.210749	0.846289	0.567,0.797	0.595,0.45
11554	ENSG00000104164.12	BLOC1S6	chr15	+	45603103	45603187	45592134	45592276	45605427	45605514	233	0.00117619	0.045232	0.927,0.885	0.523,0.681	0.304		5164	ENSG00000198690.10	FAN1	chr15	+	30925126	30928656	30925126	30925291	30925788	30928656	646	0.0448324	0.266826	0.618,0.523	0.316,0.356	0.235	3378	ENSG00000132294.15	EFR3A	chr8	+	131940498	131940644	131940498	131940575	131944744	131944872	0.208987	0.846289	0.0,0.136	0.291,0.12
67003	ENSG00000157869.16	RAB28	chr4	-	13369870	13369965	13361353	13361633	13376544	13376622	244	0.00117845	0.0452615	0.0,0.0	0.268,0.289	-0.278		8259	ENSG00000213983.12	AP1G2	chr14	-	23563379	23563638	23563379	23563502	23563583	23563638	230	0.044839	0.266826	0.44,0.393	0.66,0.683	-0.255	4854	ENSG00000159692.16	CTBP1	chr4	-	1214190	1214473	1214342	1214473	1213477	1213605	0.212874	0.846289	0.034,0.069	0.057,0.095
35432	ENSG00000168826.16	ZBTB49	chr4	+	4306137	4306184	4301988	4303091	4313040	4313114	196	0.00118097	0.0453013	0.432,0.0	0.432,1.0	-0.5		1733	ENSG00000159433.12	STARD9	chr15	+	42663280	42663917	42663280	42663490	42663819	42663917	478	0.0449975	0.267284	0.377,0.666	0.255,0.323	0.233	4876	ENSG00000136271.11	DDX56	chr7	-	44572562	44572744	44572573	44572744	44572346	44572437	0.212543	0.846289	0.097,0.016	0.108,0.091
8158	ENSG00000170004.18	CHD3	chr17	+	7907600	7907702	7907352	7907488	7907893	7908019	251	0.00119679	0.0458503	0.543,0.337	0.748,1.0	-0.434		3886	ENSG00000156709.15	AIFM1	chrX	-	130129969	130131799	130129969	130130166	130131674	130131799	1657	0.0450293	0.267284	0.051,0.023	0.038,0.095	-0.03	5527	ENSG00000108773.11	KAT2A	chr17	-	42119053	42119436	42119244	42119436	42118296	42118403	0.211943	0.846289	0.86,0.683	0.611,0.729
7576	ENSG00000185158.12	LRRC37B	chr17	+	32017971	32018054	32007987	32008132	32020696	32020803	232	0.00120272	0.0460196	0.391,0.286	0.0,0.114	0.282		795	ENSG00000071564.17	TCF3	chr19	-	1609289	1611849	1609289	1611369	1611703	1611849	483	0.0451866	0.26788	0.592,0.69	0.756,0.734	-0.104	5538	ENSG00000153253.19	SCN3A	chr2	-	165140701	165140998	165140784	165140998	165139475	165139608	0.210129	0.846289	0.763,0.562	0.616,0.616
11292	ENSG00000090905.19	TNRC6A	chr16	+	24758338	24758360	24730252	24730300	24776932	24777358	171	0.00121033	0.0462525	0.567,0.0	0.0,0.0	0.283		2816	ENSG00000150093.20	ITGB1	chr10	-	32932514	32933583	32932514	32932600	32933481	32933583	1030	0.0452507	0.267923	0.818,0.653	1.0,1.0	-0.264	5769	ENSG00000105854.13	PON2	chr7	-	95416171	95416297	95416241	95416297	95412311	95412477	0.21079	0.846289	0.131,0.232	0.254,0.346
11410	ENSG00000069966.19	GNB5	chr15	-	52135612	52135756	52133377	52133469	52141139	52141211	293	0.00121732	0.0463806	0.881,0.651	1.0,1.0	-0.234		810	ENSG00000099622.14	CIRBP	chr19	+	1271980	1273172	1271980	1272051	1272426	1273172	524	0.0453427	0.268131	0.15,0.127	0.171,0.197	-0.045	5879	ENSG00000105875.15	WDR91	chr7	-	135197043	135198151	135197992	135198151	135196143	135196337	0.213178	0.846289	0.275,0.201	0.316,1.0
13002	ENSG00000263020.6	XXbac-BPG32J3.22	chr6	+	31670972	31671008	31669318	31669508	31671155	31671284	185	0.00121825	0.0463806	0.0,0.446	1.0,1.0	-0.777		5610	ENSG00000265681.8	RPL17	chr18	-	49491531	49491833	49491531	49491584	49491745	49491833	310	0.0461445	0.27253	0.944,0.943	0.853,0.912	0.061	6024	ENSG00000147526.20	TACC1	chr8	+	38827167	38827375	38827167	38827288	38831124	38831177	0.211567	0.846289	0.136,1.0	0.612,1.0
59332	ENSG00000146223.16	RPL7L1	chr6	+	42885973	42886083	42884612	42884750	42886255	42886470	259	0.00121561	0.0463806	0.915,0.89	1.0,1.0	-0.097		8304	ENSG00000146263.12	MMS22L	chr6	-	97269901	97272881	97269901	97269992	97272703	97272881	2860	0.046244	0.272776	0.128,0.094	0.209,0.144	-0.065	6162	ENSG00000136960.13	ENPP2	chr8	-	119582417	119582602	119582429	119582602	119580115	119580167	0.210273	0.846289	0.265,0.307	0.123,0.275
67070	ENSG00000183458.14	PKD1P3	chr16	+	14919862	14920083	14919244	14919428	14920271	14920387	370	0.0012211	0.0464308	1.0,1.0	0.763,1.0	0.119		48	ENSG00000068366.21	ACSL4	chrX	-	109663210	109665494	109663210	109663402	109665419	109665494	2166	0.0466973	0.275106	0.103,0.014	0.082,0.082	-0.024	7168	ENSG00000172269.20	DPAGT1	chr11	-	119097463	119098043	119097854	119098043	119097141	119097297	0.213909	0.846289	0.82,0.925	1.0,1.0
54102	ENSG00000285953.1	CTB-161K23.3	chr7	-	92234448	92234592	92226525	92226682	92235402	92235646	293	0.00122373	0.0464726	0.922,0.915	1.0,1.0	-0.081		5088	ENSG00000071082.11	RPL31	chr2	+	101002292	101002808	101002292	101002315	101002701	101002808	535	0.0467714	0.275198	0.048,0.073	0.029,0.046	0.023	7268	ENSG00000246695.8	RASSF8-AS1	chr12	-	25952757	25955241	25955137	25955241	25947518	25947622	0.211307	0.846289	0.51,1.0	1.0,0.564
54593	ENSG00000249859.12	PVT1	chr8	+	127994882	127995093	127989161	127989291	127996560	127996598	360	0.00122867	0.0466021	1.0,1.0	1.0,0.453	0.273		5299	ENSG00000137802.14	MAPKBP1	chr15	+	41819245	41819650	41819245	41819379	41819594	41819650	364	0.0472136	0.277454	0.027,0.0	0.17,0.0	-0.072	7736	ENSG00000092098.17	RNF31	chr14	+	24148257	24148477	24148257	24148413	24148641	24148701	0.214439	0.846289	0.0,0.02	0.032,0.06
537	ENSG00000230590.11	FTX	chrX	-	74284742	74284948	74281701	74281848	74293351	74293543	355	0.00124128	0.0468466	1.0,1.0	0.37,1.0	0.315		4246	ENSG00000141279.17	NPEPPS	chr17	+	47619277	47619784	47619277	47619322	47619736	47619784	563	0.0476405	0.279613	0.827,1.0	0.787,0.787	0.126	7811	ENSG00000009830.13	POMT2	chr14	-	77279683	77279928	77279822	77279928	77278728	77278869	0.213746	0.846289	0.098,0.137	0.031,0.1
33355	ENSG00000115685.15	PPP1R7	chr2	+	241153475	241153604	241149575	241149708	241157806	241157862	278	0.00123933	0.0468466	0.801,0.714	0.855,1.0	-0.17		6509	ENSG00000121022.14	COPS5	chr8	-	67043081	67045960	67043081	67043317	67045811	67045960	2643	0.0477415	0.279858	0.122,0.097	0.021,0.128	0.035	7870	ENSG00000179364.14	PACS2	chr14	+	105381913	105382058	105381913	105382046	105382476	105382581	0.213152	0.846289	0.025,0.02	0.104,0.0
38426	ENSG00000172795.17	DCP2	chr5	+	113007937	113008042	113003941	113004077	113010755	113010807	254	0.00124023	0.0468466	0.763,0.937	1.0,0.954	-0.127		5420	ENSG00000157625.15	TAB3	chrX	-	30842965	30846644	30842965	30843049	30846550	30846644	3650	0.0479294	0.28061	0.293,0.149	0.324,0.563	-0.223	938	ENSG00000261824.7	LINC00662	chr19	-	27746020	27746340	27746080	27746340	27732795	27732967	0.214828	0.846771	0.681,0.641	0.416,0.471
62019	ENSG00000173715.18	C11orf80	chr11	+	66788159	66788269	66759042	66759096	66796280	66796364	259	0.00123966	0.0468466	0.59,1.0	0.535,0.0	0.527		1203	ENSG00000178971.16	CTC1	chr17	-	8229141	8229446	8229141	8229206	8229301	8229446	244	0.0480515	0.280628	0.675,0.912	0.337,0.647	0.302	6477	ENSG00000148356.15	LRSAM1	chr9	+	127485735	127485840	127485735	127485835	127487675	127487763	0.215315	0.847638	0.139,0.088	0.326,0.266
54341	ENSG00000253710.5	ALG11	chr13	+	52018912	52019143	52012390	52012462	52028318	52032171	380	0.00124336	0.046867	1.0,0.611	0.282,0.0	0.664		7830	ENSG00000065357.20	DGKA	chr12	+	55940896	55941325	55940896	55940980	55941251	55941325	420	0.0480142	0.280628	0.262,0.262	0.0,0.106	0.209	2593	ENSG00000172239.14	PAIP1	chr5	-	43556581	43557077	43556818	43557077	43555829	43555999	0.215982	0.849207	0.778,0.732	0.788,0.855
35178	ENSG00000076242.16	MLH1	chr3	+	37014431	37014544	37012010	37012099	37017505	37017599	262	0.00125786	0.047355	1.0,1.0	0.974,0.882	0.072		6582	ENSG00000178035.13	IMPDH2	chr3	-	49027709	49028806	49027709	49028532	49028757	49028806	374	0.0483005	0.281733	0.06,0.054	0.074,0.122	-0.041	611	ENSG00000105655.19	ISYNA1	chr19	-	18435247	18435483	18435265	18435483	18434820	18435117	0.217082	0.852476	0.017,0.012	0.018,0.027
63876	ENSG00000023697.13	DERA	chr12	+	15911690	15911753	15911358	15911414	15956935	15957033	212	0.00126922	0.0477237	0.0,0.0	0.091,0.484	-0.287		7449	ENSG00000110583.13	NAA40	chr11	+	63945839	63947003	63945839	63945935	63946950	63947003	1164	0.0486845	0.283622	0.792,0.95	0.901,1.0	-0.08	4065	ENSG00000123600.21	METTL8	chr2	-	171331764	171331867	171331803	171331867	171330558	171330698	0.217584	0.853004	0.613,0.331	1.0,0.284
289	ENSG00000101972.19	STAG2	chrX	+	123962078	123962106	123961822	123961856	124022530	124022552	177	0.00128411	0.0481051	0.123,0.272	0.0,0.0	0.198		5598	ENSG00000171109.19	MFN1	chr3	+	179378340	179378814	179378340	179378443	179378584	179378814	290	0.0487612	0.283718	0.082,0.086	0.184,0.146	-0.081	7452	ENSG00000166598.16	HSP90B1	chr12	+	103931520	103931748	103931520	103931623	103932276	103932418	0.217754	0.853004	0.016,0.022	0.104,0.0
51404	ENSG00000280828.1	RP11-274B21.1	chr7	+	128577963	128578033	128574719	128574791	128578889	128578933	219	0.00128251	0.0481051	0.614,0.731	1.0,1.0	-0.328		4338	ENSG00000143578.16	CREB3L4	chr1	+	153968929	153969455	153968929	153969176	153969333	153969455	306	0.0491431	0.285587	0.532,0.28	0.109,0.226	0.239	1009	ENSG00000270647.6	TAF15	chr17	+	35820163	35820248	35820163	35820239	35820331	35820437	0.218495	0.854269	0.848,0.875	0.892,0.891
51829	ENSG00000172071.15	EIF2AK3	chr2	-	88593912	88594108	88593271	88593405	88595468	88595663	345	0.00128328	0.0481051	0.067,0.0	0.142,0.213	-0.144		3912	ENSG00000085978.22	ATG16L1	chr2	+	233289853	233290353	233289853	233289974	233290247	233290353	422	0.0494674	0.287118	0.361,0.361	0.183,0.157	0.191	1191	ENSG00000124067.17	SLC12A4	chr16	-	67962243	67963559	67963464	67963559	67961574	67961706	0.218615	0.854269	0.549,0.326	0.61,0.528
21590	ENSG00000175105.8	ZNF654	chr3	+	88128808	88129011	88113114	88113196	88129686	88129826	352	0.00128611	0.0481207	0.733,0.679	1.0,1.0	-0.294		6701	ENSG00000160948.14	VPS28	chr8	-	144426025	144426208	144426025	144426063	144426179	144426208	265	0.0496544	0.287849	0.2,0.137	0.086,0.084	0.084	6020	ENSG00000077782.22	FGFR1	chr8	-	38419532	38419735	38419538	38419735	38418227	38418373	0.21961	0.857102	0.788,0.852	0.877,0.867
62213	ENSG00000131626.19	PPFIA1	chr11	+	70350993	70351023	70349922	70350039	70354300	70354452	179	0.00128797	0.048131	0.0,0.143	0.217,0.769	-0.421		8228	ENSG00000165819.12	METTL3	chr14	-	21499024	21499600	21499024	21499137	21499491	21499600	503	0.0497836	0.288244	1.0,0.962	1.0,0.803	0.08	6564	ENSG00000166311.10	SMPD1	chr11	+	6391383	6392196	6391383	6392156	6393215	6393387	0.220326	0.858839	0.024,0.036	0.057,0.04
24824	ENSG00000116285.13	ERRFI1	chr1	-	8015307	8015384	8011726	8014396	8015494	8015692	226	0.0012898	0.0481405	0.833,0.949	0.963,1.0	-0.091		5912	ENSG00000106009.16	BRAT1	chr7	-	2542119	2543962	2542119	2542211	2543203	2543962	1141	0.0499419	0.288805	0.077,0.074	0.086,0.175	-0.055	1429	ENSG00000177082.13	WDR73	chr15	-	84654226	84654280	84654233	84654280	84653631	84653699	0.220973	0.860305	0.851,0.417	1.0,0.489
20428	ENSG00000114120.14	SLC25A36	chr3	+	140966999	140967036	140963126	140963227	140970926	140970993	186	0.00129264	0.0481665	0.074,0.0	0.445,0.445	-0.408		8273	ENSG00000092108.22	SCFD1	chr14	+	30673256	30673997	30673256	30673347	30673930	30673997	732	0.0502941	0.290485	0.404,1.0	0.289,1.0	0.057	4321	ENSG00000115307.17	AUP1	chr2	-	74528750	74529282	74529131	74529282	74528416	74528489	0.221526	0.861401	0.947,0.942	1.0,1.0
62262	ENSG00000137522.18	RNF121	chr11	+	71987003	71987111	71960749	71960891	71990596	71990663	257	0.00129366	0.0481665	1.0,0.883	0.635,0.834	0.207		5835	ENSG00000131018.25	SYNE1	chr6	-	152133275	152135232	152133275	152133488	152135103	152135232	1764	0.0505295	0.291488	0.09,0.024	0.165,0.184	-0.117	5684	ENSG00000158321.18	AUTS2	chr7	+	70766113	70766355	70766113	70766334	70777102	70777174	0.222552	0.864329	0.778,0.788	0.769,0.568
26825	ENSG00000100526.20	CDKN3	chr14	+	54399893	54399976	54396954	54397077	54401523	54401579	232	0.00129793	0.048266	0.753,0.763	1.0,0.897	-0.191		6459	ENSG00000077782.22	FGFR1	chr8	-	38421796	38423175	38421796	38421941	38423024	38423175	1232	0.0507519	0.292413	0.81,1.0	1.0,0.95	-0.07	742	ENSG00000267228.7	RP11-49K24.6	chr18	-	47136301	47136449	47136338	47136449	47134655	47134704	0.22353	0.866762	0.233,0.258	0.354,0.32
31255	ENSG00000198721.13	ECI2	chr6	-	4119185	4119275	4117307	4117451	4125249	4125370	239	0.00130131	0.048274	0.859,0.914	1.0,1.0	-0.113		3853	ENSG00000147274.14	RBMX	chrX	-	136879016	136879453	136879016	136879123	136879318	136879453	344	0.0509463	0.293174	0.023,0.064	0.039,0.004	0.022	2753	ENSG00000061936.10	SFSWAP	chr12	+	131714070	131714240	131714070	131714193	131714821	131714953	0.224271	0.866762	1.0,0.832	0.807,0.859
44470	ENSG00000148341.18	SH3GLB2	chr9	-	129009452	129009467	129009105	129009346	129009770	129009871	164	0.00130107	0.048274	0.115,0.061	0.022,0.021	0.067		639	ENSG00000081665.14	ZNF506	chr19	-	19791561	19792484	19791561	19791731	19792410	19792484	828	0.0510778	0.293215	1.0,1.0	0.557,1.0	0.222	7134	ENSG00000150768.17	DLAT	chr11	+	112033403	112033610	112033403	112033530	112037272	112037460	0.224098	0.866762	0.014,0.082	0.025,0.033
54012	ENSG00000132549.20	VPS13B	chr8	+	99156548	99156743	99147840	99148010	99170038	99170163	344	0.00130321	0.0482856	0.973,0.878	0.982,1.0	-0.066		7349	ENSG00000102316.17	MAGED2	chrX	+	54809721	54810213	54809721	54809817	54809871	54810213	203	0.0510685	0.293215	0.961,0.924	0.974,0.97	-0.029	7565	ENSG00000172766.19	NAA16	chr13	+	41362030	41362873	41362030	41362159	41367438	41367652	0.22409	0.866762	0.721,0.529	0.463,0.517
44719	ENSG00000163728.11	TTC14	chr3	+	180604851	180605007	180604477	180604607	180605765	180605837	305	0.00130916	0.0484468	1.0,0.782	1.0,1.0	-0.109		981	ENSG00000136490.9	LIMD2	chr17	-	63698798	63699069	63698798	63698818	63699027	63699069	358	0.0515004	0.295281	1.0,1.0	0.885,0.928	0.093	5255	ENSG00000105325.15	FZR1	chr19	+	3534420	3534522	3534420	3534513	3534794	3534836	0.225162	0.867036	0.079,0.0	0.0,0.239
47584	ENSG00000198945.8	L3MBTL3	chr6	+	130049650	130049830	130049281	130049393	130051248	130051343	329	0.00132056	0.0488095	1.0,0.145	1.0,1.0	-0.427		5480	ENSG00000179262.10	RAD23A	chr19	+	12948685	12949159	12948685	12948813	12949080	12949159	416	0.0516977	0.295693	0.472,1.0	0.264,0.417	0.395	6690	ENSG00000181929.13	PRKAG1	chr12	-	49018523	49018748	49018731	49018748	49013061	49013110	0.225	0.867036	0.0,0.019	0.114,0.0
22983	ENSG00000198873.12	GRK5	chr10	+	119380814	119380927	119326515	119326611	119396694	119396772	262	0.00133118	0.0491422	0.733,1.0	1.0,1.0	-0.133		6369	ENSG00000126522.17	ASL	chr7	+	66086743	66088921	66086743	66087791	66088806	66088921	1164	0.0516573	0.295693	0.079,0.038	0.187,0.113	-0.091	7178	ENSG00000150433.10	TMEM218	chr11	-	125102636	125102809	125102733	125102809	125102131	125102317	0.224955	0.867036	0.708,1.0	0.0,1.0
26391	ENSG00000188342.12	GTF2F2	chr13	+	45149769	45149788	45136732	45136806	45151686	45151831	168	0.00133353	0.0491692	1.0,1.0	1.0,0.639	0.18		1422	ENSG00000103496.15	STX4	chr16	+	31039540	31039818	31039540	31039651	31039722	31039818	220	0.0517717	0.295758	0.053,0.203	0.0,0.101	0.077	3146	ENSG00000127948.16	POR	chr7	+	75980338	75980722	75980338	75980488	75981047	75981172	0.226133	0.869721	0.053,0.135	0.105,0.178
6000	ENSG00000181396.13	OGFOD3	chr17	-	82394330	82394543	82392009	82392534	82398195	82398319	362	0.00133769	0.0492033	0.478,0.27	0.0,0.186	0.281		1908	ENSG00000130294.18	KIF1A	chr2	-	240725270	240726940	240725270	240725404	240726825	240726940	1570	0.0518437	0.29581	0.012,0.045	0.015,0.019	0.011	1428	ENSG00000177082.13	WDR73	chr15	-	84653631	84654000	84653699	84654000	84652713	84652802	0.226782	0.869793	0.821,1.0	1.0,1.0
19088	ENSG00000006327.14	TNFRSF12A	chr16	+	3021188	3021319	3020367	3020491	3021554	3021689	280	0.00133629	0.0492033	0.378,1.0	1.0,1.0	-0.311		4021	ENSG00000115286.20	NDUFS7	chr19	+	1390870	1391165	1390870	1391050	1391118	1391165	217	0.0520907	0.296388	0.063,0.117	0.077,0.0	0.051	6381	ENSG00000106028.11	SSBP1	chr7	+	141738357	141738503	141738357	141738410	141739123	141739190	0.226974	0.869793	0.191,0.12	0.105,0.118
30263	ENSG00000133059.17	DSTYK	chr1	-	205148204	205148339	205142504	205147745	205150679	205150794	284	0.00133981	0.0492219	0.55,0.786	1.0,1.0	-0.332		6049	ENSG00000104957.14	CCDC130	chr19	+	13758867	13759272	13758867	13759010	13759099	13759272	238	0.0520287	0.296388	0.173,0.472	0.619,0.527	-0.25	7489	ENSG00000122966.17	CIT	chr12	-	119784188	119785065	119784959	119785065	119783907	119784051	0.226839	0.869793	0.341,1.0	0.139,0.362
58862	ENSG00000151150.22	ANK3	chr10	-	60059697	60060033	60059391	60059430	60063110	60063254	485	0.00134356	0.0493001	0.734,0.606	1.0,1.0	-0.33		7409	ENSG00000167986.15	DDB1	chr11	-	61314046	61314486	61314046	61314202	61314307	61314486	254	0.0521336	0.296388	0.557,0.313	0.898,0.578	-0.303	1539	ENSG00000128928.10	IVD	chr15	+	40407635	40407812	40407635	40407725	40407938	40407990	0.227541	0.869865	0.029,0.174	0.0,0.123
26800	ENSG00000237187.9	NR2F1-AS1	chr5	-	93497953	93498156	93496056	93496103	93500956	93501160	352	0.00134859	0.0494249	1.0,0.0	1.0,1.0	-0.5		2405	ENSG00000170445.16	HARS1	chr5	-	140677907	140679127	140677907	140678015	140679001	140679127	1135	0.0522489	0.296686	0.111,0.134	0.208,0.208	-0.085	6023	ENSG00000077782.22	FGFR1	chr8	-	38428345	38428435	38428351	38428435	38427920	38428093	0.227496	0.869865	0.325,0.47	0.226,0.347
7872	ENSG00000072210.19	ALDH3A2	chr17	+	19673150	19673275	19671720	19671956	19675495	19675499	274	0.00135634	0.0496491	0.189,0.214	0.0,0.0	0.202		6353	ENSG00000082014.17	SMARCD3	chr7	-	151240424	151241653	151240424	151240522	151241491	151241653	1118	0.0524158	0.297275	0.219,0.205	0.331,0.264	-0.085	559	ENSG00000105193.9	RPS16	chr19	-	39435606	39435708	39435657	39435708	39433664	39433761	0.229204	0.869934	0.973,0.989	0.98,0.968
5091	ENSG00000196459.15	TRAPPC2	chrX	-	13734049	13734185	13719870	13719982	13734524	13734545	285	0.00136707	0.0499817	1.0,1.0	0.0,1.0	0.5		5123	ENSG00000079785.16	DDX1	chr2	+	15627053	15628839	15627053	15628710	15628796	15628839	235	0.0528718	0.299501	0.23,0.034	0.086,0.0	0.089	2000	ENSG00000132676.16	DAP3	chr1	+	155689090	155689243	155689090	155689174	155709772	155709824	0.228448	0.869934	0.215,0.208	0.112,0.173
16904	ENSG00000008086.13	CDKL5	chrX	+	18623878	18624001	18619866	18619966	18625127	18625247	272	0.00137006	0.050031	0.523,0.291	0.215,0.0	0.3		2911	ENSG00000269858.6	EGLN2	chr19	+	40807137	40807551	40807137	40807274	40807483	40807551	358	0.053041	0.300099	0.192,0.15	0.117,0.112	0.056	2811	ENSG00000139620.13	KANSL2	chr12	-	48660365	48660619	48660467	48660619	48654940	48655060	0.22912	0.869934	0.926,0.936	0.947,0.723
66667	ENSG00000188811.14	NHLRC3	chr13	+	39042104	39042305	39039563	39039711	39044089	39044181	350	0.00137318	0.0500849	0.904,1.0	0.879,0.652	0.186		914	ENSG00000184009.13	ACTG1	chr17	-	81511187	81511803	81511187	81511626	81511762	81511803	285	0.053168	0.300111	0.933,0.969	0.987,0.97	-0.027	3128	ENSG00000163374.20	YY1AP1	chr1	-	155672520	155672731	155672559	155672731	155670319	155670464	0.228803	0.869934	0.0,0.067	0.0,0.122
27224	ENSG00000107341.5	UBE2R2	chr9	+	33911963	33912098	33900173	33900271	33917017	33920399	284	0.00137807	0.0501971	0.932,1.0	0.799,0.896	0.118		1987	ENSG00000112514.18	CUTA	chr6	-	33417096	33417310	33417096	33417142	33417250	33417310	257	0.0531706	0.300111	0.137,0.099	0.068,0.051	0.059	4519	ENSG00000132950.19	ZMYM5	chr13	-	19851354	19852190	19851688	19852190	19838699	19838985	0.228255	0.869934	0.925,0.749	1.0,0.78
33050	ENSG00000116353.16	MECR	chr1	-	29220837	29220921	29216587	29216685	29230730	29230897	233	0.00138121	0.0501971	0.0,0.066	0.49,0.242	-0.333		6812	ENSG00000107371.14	EXOSC3	chr9	-	37783913	37785064	37783913	37784063	37784720	37785064	806	0.0533695	0.300873	0.425,0.105	0.564,0.325	-0.179	4796	ENSG00000115282.21	TTC31	chr2	+	74491480	74491672	74491480	74491666	74492003	74492055	0.227996	0.869934	0.616,0.658	0.743,0.0
34326	ENSG00000091972.18	CD200	chr3	+	112335942	112336017	112333155	112333224	112340901	112340983	224	0.00138065	0.0501971	0.307,0.222	0.0,0.0	0.265		5509	ENSG00000164611.13	PTTG1	chr5	+	160422301	160422893	160422301	160422403	160422708	160422893	454	0.0535503	0.301532	0.042,0.052	0.187,0.062	-0.077	5291	ENSG00000137274.13	BPHL	chr6	+	3137361	3137493	3137361	3137422	3140385	3140509	0.231485	0.87754	1.0,1.0	0.865,0.905
7535	ENSG00000073536.18	NLE1	chr17	-	35139848	35140066	35139234	35139314	35141978	35142122	367	0.00138447	0.0502556	1.0,1.0	0.404,1.0	0.298		2362	ENSG00000070061.16	ELP1	chr9	-	108880051	108881765	108880051	108880165	108881704	108881765	1688	0.0537188	0.30176	0.018,0.009	0.016,0.036	-0.013	7371	ENSG00000170581.14	STAT2	chr12	-	56349344	56349509	56349425	56349509	56349162	56349261	0.232732	0.881215	0.393,0.178	0.085,0.224
50528	ENSG00000001629.10	ANKIB1	chr7	+	92386508	92386643	92371476	92371607	92387797	92387884	284	0.00138907	0.0503026	0.737,1.0	1.0,1.0	-0.131		3174	ENSG00000137563.13	GGH	chr8	-	63023906	63024186	63023906	63023997	63024079	63024186	231	0.0537095	0.30176	0.0,0.0	0.223,0.0	-0.112	5332	ENSG00000129810.15	SGO1	chr3	-	20174248	20175055	20175004	20175055	20171042	20171232	0.233051	0.881372	0.945,0.895	0.827,0.864
64050	ENSG00000110841.14	PPFIBP1	chr12	+	27677063	27677096	27676427	27676599	27679488	27679639	182	0.00138896	0.0503026	0.0,0.235	0.0,0.0	0.117		4950	ENSG00000143702.16	CEP170	chr1	-	243185778	243186422	243185778	243186072	243186258	243186422	335	0.0538002	0.301858	0.522,0.562	0.712,0.682	-0.155	971	ENSG00000168610.16	STAT3	chr17	-	42322281	42322494	42322284	42322494	42317181	42317224	0.234634	0.8821	0.9,0.901	0.852,0.889
40060	ENSG00000007341.19	ST7L	chr1	-	112583971	112584126	112582374	112582472	112591524	112591603	304	0.00139178	0.0503407	0.831,0.774	1.0,1.0	-0.198		7064	ENSG00000026025.16	VIM	chr10	+	17235168	17236379	17235168	17235389	17235845	17236379	605	0.0539141	0.302137	0.039,0.031	0.043,0.044	-0.008	1014	ENSG00000073536.18	NLE1	chr17	-	35139819	35140066	35139848	35140066	35139234	35139314	0.233866	0.8821	0.193,0.065	0.095,0.295
35678	ENSG00000154380.17	ENAH	chr1	-	225504990	225505053	225500991	225501070	225507950	225508017	212	0.00139457	0.0503817	0.129,0.079	0.0,0.032	0.088		2201	ENSG00000110002.16	VWA5A	chr11	+	124115449	124116680	124115449	124115482	124116565	124116680	1232	0.0541139	0.302896	0.623,1.0	1.0,1.0	-0.189	2769	ENSG00000047849.22	MAP4	chr3	-	47870812	47871105	47870857	47871105	47857430	47857512	0.234329	0.8821	0.913,0.829	1.0,0.856
49757	ENSG00000129103.19	SUMF2	chr7	+	56072996	56073111	56068481	56068638	56076833	56076889	264	0.00139845	0.0504618	0.717,0.664	1.0,0.871	-0.245		4149	ENSG00000182389.20	CACNB4	chr2	-	151869176	151870611	151869176	151869235	151870530	151870611	1444	0.0542168	0.303113	1.0,1.0	0.608,0.662	0.365	4967	ENSG00000144120.13	TMEM177	chr2	+	119679166	119679617	119679166	119679225	119680831	119682118	0.234057	0.8821	0.609,0.579	0.658,0.239
34091	ENSG00000070814.22	TCOF1	chr5	+	150391543	150391657	150389886	150390023	150391956	150392176	263	0.00140169	0.0505188	1.0,0.943	0.819,0.804	0.16		4105	ENSG00000161204.11	ABCF3	chr3	+	184189254	184189443	184189254	184189277	184189387	184189443	259	0.0543909	0.303427	0.02,0.057	0.097,0.083	-0.051	7316	ENSG00000050426.16	LETMD1	chr12	+	51048326	51048518	51048326	51048478	51049033	51049185	0.234525	0.8821	0.0,0.0	0.136,0.136
10723	ENSG00000166503.9	HDGFL3	chr15	-	83189360	83189516	83164038	83164075	83192251	83192308	305	0.00140975	0.0507494	0.328,0.328	1.0,1.0	-0.672		4559	ENSG00000177646.20	ACAD9	chr3	+	128908184	128909099	128908184	128908264	128908972	128909099	857	0.0544018	0.303427	0.064,0.17	0.05,0.076	0.054	794	ENSG00000160469.17	BRSK1	chr19	+	55287213	55287303	55287213	55287299	55289479	55289620	0.235743	0.885222	0.109,0.0	0.163,0.081
36797	ENSG00000139624.14	CERS5	chr12	-	50144768	50144969	50143951	50144057	50167100	50167303	350	0.00141258	0.0507912	0.146,0.051	0.0,0.0	0.098		4885	ENSG00000075702.19	WDR62	chr19	+	36101213	36102851	36101213	36101317	36102736	36102851	1568	0.0545825	0.304075	0.627,1.0	1.0,1.0	-0.186	6464	ENSG00000148187.18	MRRF	chr9	+	122285168	122285946	122285168	122285287	122286038	122286166	0.236399	0.886634	1.0,0.504	0.67,0.414
5544	ENSG00000141431.13	ASXL3	chr18	+	33626861	33627070	33607593	33607676	33644893	33645002	358	0.00141884	0.0509559	1.0,1.0	1.0,0.217	0.391		7835	ENSG00000185664.15	PMEL	chr12	-	55956948	55957671	55956948	55957059	55957185	55957671	275	0.0555053	0.30885	0.655,1.0	0.822,0.387	0.223	4197	ENSG00000177646.20	ACAD9	chr3	+	128902552	128902632	128902552	128902628	128904061	128904132	0.236756	0.886928	0.358,0.109	0.0,0.226
19650	ENSG00000143537.14	ADAM15	chr1	+	155055701	155055852	155054313	155054506	155055931	155056000	300	0.00142173	0.0509996	0.522,1.0	1.0,1.0	-0.239		673	ENSG00000011243.19	AKAP8L	chr19	-	15397713	15399410	15397713	15397855	15399301	15399410	1595	0.0558385	0.310338	0.539,0.557	0.679,0.62	-0.101	2597	ENSG00000175455.16	CCDC14	chr3	-	123955842	123956115	123956045	123956115	123948895	123949132	0.241384	0.901679	0.819,0.801	0.925,0.836
27452	ENSG00000188517.16	COL25A1	chr4	-	108825195	108825222	108823875	108824227	108827134	108827188	176	0.00142797	0.0511631	1.0,0.458	0.0,0.458	0.5		953	ENSG00000132475.10	H3-3B	chr17	-	75778809	75779184	75778809	75778963	75779046	75779184	232	0.0560506	0.310419	0.013,0.015	0.026,0.04	-0.019	7112	ENSG00000104872.11	PIH1D1	chr19	-	49451367	49451578	49451484	49451578	49450781	49450848	0.241084	0.901679	0.0,0.025	0.041,0.024
59650	ENSG00000198756.12	COLGALT2	chr1	-	183973615	183973750	183969268	183969473	183975096	183975214	284	0.00143751	0.0514442	1.0,1.0	0.794,0.808	0.199		4310	ENSG00000143093.15	STRIP1	chr1	+	110049111	110050409	110049111	110049238	110050342	110050409	1253	0.0559937	0.310419	0.669,0.655	0.625,1.0	-0.15	7378	ENSG00000196378.13	ZNF34	chr8	-	144780227	144780280	144780231	144780280	144778438	144778525	0.241547	0.901679	0.709,1.0	1.0,0.814
36692	ENSG00000175029.17	CTBP2	chr10	-	125110989	125111093	125038996	125039155	125160318	125160513	253	0.00144193	0.0515175	0.945,0.964	0.752,0.819	0.169		5933	ENSG00000115548.17	KDM3A	chr2	+	86478607	86480362	86478607	86478735	86480166	86480362	1580	0.0560085	0.310419	0.562,0.536	0.485,0.232	0.191	2604	ENSG00000173226.17	IQCB1	chr3	-	121834248	121834479	121834390	121834479	121828860	121828972	0.241838	0.901707	0.099,0.24	0.079,0.108
44015	ENSG00000143924.19	EML4	chr2	+	42261120	42261294	42256500	42256630	42263177	42263306	323	0.00144294	0.0515175	0.665,0.614	0.515,0.411	0.176		7425	ENSG00000162191.14	UBXN1	chr11	-	62676812	62677832	62676812	62677005	62677517	62677832	661	0.0561692	0.31071	0.219,0.123	0.133,0.074	0.067	2940	ENSG00000138796.18	HADH	chr4	+	108023473	108028069	108023473	108027760	108033175	108033292	0.243254	0.90592	0.072,0.14	0.071,0.083
45049	ENSG00000139793.19	MBNL2	chr13	+	97366458	97366553	97357481	97357635	97391321	97391599	244	0.00144929	0.0516834	0.799,0.939	0.94,1.0	-0.101		5037	ENSG00000148985.20	PGAP2	chr11	+	3823882	3824376	3823882	3824135	3824269	3824376	283	0.0563955	0.311596	0.283,0.158	0.095,0.073	0.136	7768	ENSG00000100519.12	PSMC6	chr14	+	52707201	52707529	52707201	52707304	52708308	52708388	0.244039	0.90778	0.0,0.443	0.117,0.117
14192	ENSG00000111666.11	CHPT1	chr12	+	101714883	101715076	101714503	101714645	101716727	101716812	342	0.00145562	0.0517172	0.567,1.0	0.0,0.685	0.441		2149	ENSG00000255717.7	SNHG1	chr11	-	62853800	62854551	62853800	62853833	62854518	62854551	834	0.0564846	0.311724	0.876,0.588	0.897,0.86	-0.147	3522	ENSG00000247134.7	RP11-11N9.4	chr8	+	33041634	33041771	33041634	33041743	33044366	33044855	0.244843	0.909703	0.922,0.797	0.918,0.941
23173	ENSG00000271723.5	MROH7-TTC4	chr1	+	54733628	54733710	54731485	54731700	54737581	54737664	231	0.00145265	0.0517172	1.0,0.671	1.0,1.0	-0.164		782	ENSG00000104969.11	SGTA	chr19	-	2767135	2767686	2767135	2767220	2767579	2767686	508	0.0567502	0.312457	0.0,0.0	0.047,0.044	-0.045	4769	ENSG00000147862.17	NFIB	chr9	-	14116180	14116346	14116207	14116346	14112998	14113081	0.24596	0.912783	0.651,0.536	0.458,0.414
51288	ENSG00000008311.16	AASS	chr7	-	122082787	122082891	122081499	122081595	122086011	122086153	253	0.00145518	0.0517172	0.227,0.0	1.0,0.371	-0.572		2734	ENSG00000106263.18	EIF3B	chr7	+	2366316	2366591	2366316	2366448	2366524	2366591	225	0.0567254	0.312457	0.044,0.047	0.067,0.119	-0.048	3730	ENSG00000053900.11	ANAPC4	chr4	+	25405572	25405622	25405572	25405619	25406828	25406885	0.246707	0.914488	0.151,0.065	0.303,0.116
57822	ENSG00000068784.13	SRBD1	chr2	-	45476992	45477075	45419787	45419894	45488239	45488331	232	0.00145704	0.0517172	0.956,0.788	1.0,1.0	-0.128		5763	ENSG00000184144.12	CNTN2	chr1	+	205072482	205073236	205072482	205072595	205073067	205073236	621	0.0569131	0.312989	0.138,0.088	0.074,0.0	0.076	2294	ENSG00000109184.15	DCUN1D4	chr4	+	51886567	51887244	51886567	51886638	51891759	51891851	0.24766	0.91695	0.143,0.195	0.303,0.184
4663	ENSG00000171291.9	ZNF439	chr19	+	11866204	11866331	11848725	11848930	11866536	11866597	276	0.00146119	0.0518042	1.0,1.0	1.0,0.351	0.325		330	ENSG00000102125.16	TAZ	chrX	+	154419542	154419746	154419542	154419623	154419704	154419746	230	0.0571885	0.313957	0.597,0.097	1.0,0.504	-0.405	1963	ENSG00000123213.23	NLN	chr5	+	65792453	65792655	65792453	65792601	65809514	65809701	0.249123	0.917812	0.801,1.0	1.0,0.794
36286	ENSG00000163848.20	ZNF148	chr3	-	125314936	125315053	125313307	125313656	125323308	125323444	266	0.00146327	0.0518176	0.165,0.147	0.0,0.045	0.134		1128	ENSG00000108262.16	GIT1	chr17	-	29575287	29575703	29575287	29575470	29575629	29575703	308	0.0572225	0.313957	0.0,0.195	0.326,0.108	-0.119	2531	ENSG00000163754.18	GYG1	chr3	+	148996741	148996904	148996741	148996892	149009275	149009402	0.248866	0.917812	1.0,0.881	1.0,1.0
49872	ENSG00000197008.10	ZNF138	chr7	+	64830939	64831076	64794387	64794571	64831450	64831803	286	0.00146585	0.0518483	0.0,0.343	0.343,0.723	-0.362		2540	ENSG00000229989.4	MIR181A1HG	chr1	-	198897809	198900569	198897809	198898624	198900410	198900569	1935	0.0577341	0.316025	1.0,0.829	1.0,1.0	-0.086	3211	ENSG00000151576.10	QTRT2	chr3	+	114065236	114065457	114065236	114065278	114066227	114066283	0.249233	0.917812	0.941,0.932	0.909,1.0
1059	ENSG00000079974.18	RABL2B	chr22	-	50769454	50769552	50769040	50769124	50775771	50775851	247	0.00147594	0.0521408	0.232,0.644	1.0,0.644	-0.384		5303	ENSG00000158941.16	CCAR2	chr8	+	22619149	22620468	22619149	22619355	22619637	22620468	431	0.0578005	0.316025	0.48,0.434	0.309,0.302	0.151	4383	ENSG00000116991.11	SIPA1L2	chr1	-	232608826	232608988	232608911	232608988	232574173	232574222	0.249339	0.917812	0.0,0.267	1.0,0.0
15488	ENSG00000134352.20	IL6ST	chr5	-	55969549	55969855	55964145	55964312	55976214	55976278	455	0.00147754	0.0521408	0.949,1.0	0.953,0.747	0.124		5546	ENSG00000196531.14	NACA	chr12	-	56712439	56712908	56712439	56712552	56712785	56712908	382	0.0577479	0.316025	0.235,0.184	0.281,0.353	-0.108	6091	ENSG00000160710.18	ADAR	chr1	-	154590183	154590409	154590261	154590409	154589756	154589928	0.248431	0.917812	0.942,0.902	0.942,0.951
65524	ENSG00000184752.14	NDUFA12	chr12	-	94994169	94994257	94971331	94971620	95002738	95002821	237	0.00148459	0.0523288	0.883,0.718	0.929,0.947	-0.137		443	ENSG00000179909.16	ZNF154	chr19	-	57697366	57701145	57697366	57697841	57700987	57701145	3295	0.0580813	0.31661	1.0,0.621	0.826,1.0	-0.103	5967	ENSG00000168890.14	TMEM150A	chr2	-	85601305	85601482	85601434	85601482	85601020	85601107	0.249647	0.917879	0.728,0.763	1.0,0.617
26133	ENSG00000140525.19	FANCI	chr15	+	89245194	89245311	89244003	89244033	89247628	89247731	266	0.00149617	0.0526758	0.0,0.0	0.528,0.359	-0.444		761	ENSG00000105426.17	PTPRS	chr19	-	5218419	5219467	5218419	5218532	5219309	5219467	926	0.0579798	0.31661	0.078,0.102	0.064,0.066	0.025	2879	ENSG00000020129.16	NCDN	chr1	+	35558155	35558484	35558155	35558223	35559106	35559247	0.250581	0.91944	0.072,0.232	0.165,0.3
351	ENSG00000077264.16	PAK3	chrX	+	111013827	111013900	110944284	110944628	111123076	111123278	222	0.00150594	0.0528329	0.0,0.309	0.627,0.472	-0.395		2622	ENSG00000249673.7	NOP14-AS1	chr4	+	2934939	2937844	2934939	2935735	2937751	2937844	2165	0.0581089	0.31661	0.94,0.855	0.737,0.791	0.133	5926	ENSG00000013374.17	NUB1	chr7	+	151374096	151374243	151374096	151374201	151375847	151375943	0.250651	0.91944	0.0,0.701	0.584,0.342
13821	ENSG00000241956.10	CTC-340A15.2	chr5	+	164486668	164486741	164354139	164354224	164722764	164722807	222	0.00150743	0.0528329	1.0,0.573	0.573,0.212	0.394		3436	ENSG00000183258.12	DDX41	chr5	-	177512495	177512876	177512495	177512645	177512779	177512876	283	0.0583249	0.317419	0.046,0.123	0.19,0.149	-0.085	2060	ENSG00000050820.17	BCAR1	chr16	-	75236827	75236998	75236881	75236998	75234888	75235986	0.252129	0.922611	0.012,0.033	0.0,0.007
26074	ENSG00000135250.17	SRPK2	chr7	-	105125781	105125874	105117387	105118022	105126247	105126340	242	0.00150931	0.0528329	0.077,0.065	0.032,0.0	0.055		4098	ENSG00000138074.15	SLC5A6	chr2	-	27202812	27203345	27202812	27202880	27203232	27203345	501	0.0584969	0.317622	0.106,0.082	0.373,0.129	-0.157	3564	ENSG00000223960.7	CHROMR	chr2	+	178426365	178426661	178426365	178426505	178430694	178430889	0.252251	0.922611	0.746,0.128	0.281,0.089
34833	ENSG00000228109.1	MELTF-AS1	chr3	+	197004096	197004359	197003601	197003970	197004493	197004744	412	0.00150755	0.0528329	1.0,1.0	0.644,0.153	0.601		6956	ENSG00000182484.15	WASH6P	chrX	+	156022313	156022834	156022313	156022459	156022698	156022834	388	0.0584568	0.317622	0.0,0.161	0.277,1.0	-0.558	6700	ENSG00000147044.23	CASK	chrX	-	41853096	41853227	41853114	41853227	41787177	41787283	0.252388	0.922611	0.116,0.11	0.192,0.133
57824	ENSG00000068784.13	SRBD1	chr2	-	45547521	45547612	45546731	45546839	45551124	45551282	240	0.00150801	0.0528329	1.0,1.0	1.0,0.736	0.132		792	ENSG00000100242.15	SUN2	chr22	-	38740266	38741050	38740266	38740432	38740888	38741050	605	0.0586916	0.318228	1.0,1.0	0.798,0.701	0.25	4117	ENSG00000030419.17	IKZF2	chr2	-	213056832	213057099	213056910	213057099	213049712	213049880	0.25393	0.926463	0.568,0.644	0.467,0.396
33209	ENSG00000104490.18	NCALD	chr8	-	101779923	101779979	101719385	101719648	101790861	101790947	205	0.00151127	0.0528405	0.187,0.228	0.048,0.08	0.144		4194	ENSG00000071894.17	CPSF1	chr8	-	144393882	144394160	144393882	144394038	144394112	144394160	223	0.058767	0.318228	0.539,0.455	0.572,0.077	0.173	5566	ENSG00000198740.9	ZNF652	chr17	-	49316825	49317983	49317365	49317983	49312697	49312845	0.254317	0.926463	0.768,0.722	0.722,0.511
17995	ENSG00000091136.15	LAMB1	chr7	-	107932173	107932406	107931355	107931500	107935414	107935656	382	0.00151525	0.0529191	1.0,0.976	0.84,0.82	0.158		7924	ENSG00000087460.29	GNAS	chr20	+	58909950	58910401	58909950	58910081	58910333	58910401	401	0.0588111	0.318228	0.01,0.007	0.019,0.011	-0.006	7217	ENSG00000111203.13	ITFG2	chr12	+	2818105	2818353	2818105	2818277	2820085	2820225	0.254056	0.926463	0.249,1.0	1.0,0.0
20912	ENSG00000114030.13	KPNA1	chr3	-	122457725	122457848	122453869	122454001	122461223	122461318	272	0.0015237	0.0531529	0.036,0.077	0.0,0.0	0.056		1977	ENSG00000156650.14	KAT6B	chr10	+	74981786	74985241	74981786	74981928	74985079	74985241	3300	0.0589135	0.318416	0.453,0.387	0.263,0.198	0.19	725	ENSG00000197563.11	PIGN	chr18	-	62088390	62088842	62088755	62088842	62085208	62085264	0.255551	0.92989	0.153,0.104	0.043,0.225
22193	ENSG00000164087.8	POC1A	chr3	-	52096568	52096712	52075225	52075985	52122378	52122477	293	0.00152653	0.0531907	0.504,0.0	1.0,1.0	-0.748		21	ENSG00000196924.19	FLNA	chrX	-	154350908	154351696	154350908	154351041	154351580	154351696	688	0.0591922	0.319132	0.091,0.072	0.099,0.111	-0.024	4603	ENSG00000179818.15	PCBP1-AS1	chr2	-	70083506	70083687	70083537	70083687	70051202	70051305	0.256022	0.930538	0.453,0.332	0.249,0.237
54882	ENSG00000259905.7	PWRN1	chr15	+	24150454	24150569	24143819	24143905	24158940	24159182	264	0.00152846	0.0531969	1.0,1.0	0.738,0.0	0.631		488	ENSG00000126458.4	RRAS	chr19	-	49636823	49637130	49636823	49636926	49637042	49637130	265	0.059723	0.319132	0.219,0.88	0.158,0.219	0.361	6189	ENSG00000249859.12	PVT1	chr8	+	127795893	127796071	127795893	127796008	127816827	127816884	0.257071	0.93328	1.0,1.0	1.0,0.26
2068	ENSG00000159216.19	RUNX1	chr21	-	34834409	34834601	34799300	34799462	34859473	34859578	341	0.00153906	0.0535049	0.663,0.724	1.0,1.0	-0.306		2139	ENSG00000168944.17	CEP120	chr5	-	123389923	123391337	123389923	123390140	123391109	123391337	1118	0.0592805	0.319132	0.082,0.061	0.279,0.067	-0.102	4923	ENSG00000163703.20	CRELD1	chr3	+	9940849	9941026	9940849	9941016	9941110	9941206	0.258971	0.938304	0.882,0.868	1.0,1.0
34510	ENSG00000168234.13	TTC39C	chr18	+	24069156	24069271	24066011	24066140	24080584	24080939	264	0.00154526	0.0536591	1.0,1.0	0.717,0.717	0.283		2645	ENSG00000242086.8	MUC20-OT1	chr3	+	195708133	195708807	195708133	195708435	195708746	195708807	460	0.0596966	0.319132	0.85,1.0	1.0,0.327	0.262	6032	ENSG00000120925.16	RNF170	chr8	-	42896253	42896723	42896483	42896723	42887727	42887871	0.259254	0.938304	0.247,0.208	0.179,0.0
56033	ENSG00000187735.14	TCEA1	chr8	-	54002891	54003086	54000009	54000050	54010429	54010492	344	0.00155415	0.0539061	0.045,0.086	0.0,0.0	0.066		4315	ENSG00000204843.13	DCTN1	chr2	-	74366458	74366932	74366458	74366620	74366782	74366932	311	0.0595032	0.319132	0.023,0.031	0.095,0.038	-0.04	7650	ENSG00000198561.16	CTNND1	chr11	+	57805541	57806478	57805541	57806035	57806914	57806983	0.259342	0.938304	0.324,0.487	0.476,0.47
9023	ENSG00000088854.13	C20orf194	chr20	-	3290128	3290217	3287631	3287790	3294138	3294256	238	0.00155759	0.0539638	0.779,0.964	1.0,0.952	-0.105		4324	ENSG00000145604.17	SKP2	chr5	+	36152108	36153042	36152108	36152270	36152770	36153042	649	0.0596156	0.319132	0.084,0.219	0.111,0.046	0.073	1764	ENSG00000182872.16	RBM10	chrX	+	47179879	47180040	47179879	47180037	47180211	47180309	0.259941	0.939401	0.417,0.477	0.495,0.567
35020	ENSG00000112139.17	MDGA1	chr6	-	37641736	37642049	37638536	37638667	37643808	37643943	462	0.00156113	0.0540249	0.0,0.097	0.392,0.446	-0.371		4489	ENSG00000163479.14	SSR2	chr1	-	156011809	156012565	156011809	156011887	156012384	156012565	646	0.059403	0.319132	0.806,0.776	0.698,1.0	-0.058	4233	ENSG00000163848.20	ZNF148	chr3	-	125323308	125323444	125323387	125323444	125313307	125313656	0.260487	0.940301	0.943,0.956	0.913,1.0
63926	ENSG00000052126.15	PLEKHA5	chr12	+	19346993	19347182	19345841	19345888	19348398	19348519	338	0.00156431	0.0540737	0.435,0.181	0.469,1.0	-0.426		5353	ENSG00000160446.19	ZDHHC12	chr9	-	128722437	128724127	128722437	128722574	128723993	128724127	1568	0.0591254	0.319132	0.087,0.052	0.117,0.363	-0.17	338	ENSG00000124155.18	PIGT	chr20	+	45421382	45421664	45421382	45421583	45424215	45424381	0.261331	0.942275	0.085,0.085	0.1,0.023
54344	ENSG00000253710.5	ALG11	chr13	+	52024005	52024937	52012397	52012462	52028318	52028749	1081	0.00156941	0.0541881	1.0,0.96	0.786,0.934	0.12		5602	ENSG00000197558.13	SSPOP	chr7	+	149795538	149796515	149795538	149795666	149796370	149796515	853	0.059611	0.319132	0.149,0.055	0.512,0.344	-0.326	746	ENSG00000152234.16	ATP5F1A	chr18	-	46094979	46095131	46095052	46095131	46091681	46091851	0.262213	0.943312	0.023,0.054	0.06,0.051
38429	ENSG00000065882.16	TBC1D1	chr4	+	38051898	38052060	38049617	38049898	38054198	38054338	311	0.00157601	0.0543263	0.134,0.138	0.068,0.0	0.102		5662	ENSG00000185000.12	DGAT1	chr8	-	144318260	144318566	144318260	144318362	144318460	144318566	247	0.0594304	0.319132	0.356,0.131	0.194,0.028	0.133	1906	ENSG00000126091.21	ST3GAL3	chr1	+	43736232	43736425	43736232	43736380	43792101	43792149	0.261946	0.943312	0.125,0.167	0.187,0.277
62670	ENSG00000166004.15	CEP295	chr11	+	93723040	93723289	93721953	93722050	93725650	93725831	398	0.00157698	0.0543263	1.0,1.0	0.333,1.0	0.334		1629	ENSG00000255571.9	MIR9-3HG	chr15	+	89387816	89389482	89387816	89387881	89389344	89389482	1612	0.0599721	0.3201	1.0,1.0	1.0,0.625	0.188	5383	ENSG00000130396.21	AFDN	chr6	+	167965756	167966276	167965756	167966270	167969113	167969198	0.262795	0.944336	0.0,0.366	0.0,0.658
34724	ENSG00000113851.15	CRBN	chr3	-	3152455	3152587	3148991	3151045	3153423	3153488	281	0.00158747	0.054626	1.0,1.0	0.893,0.931	0.088		1889	ENSG00000204410.16	MSH5	chr6	+	31759096	31759512	31759096	31759177	31759424	31759512	396	0.060271	0.321331	0.468,0.601	0.295,0.317	0.228	876	ENSG00000170921.15	TANC2	chr17	+	63099174	63099357	63099174	63099246	63151269	63151380	0.265506	0.944764	0.878,1.0	0.912,1.0
29886	ENSG00000113387.12	SUB1	chr5	+	32594570	32594872	32591562	32591685	32598960	32599069	451	0.00158985	0.054646	0.019,0.017	0.091,0.042	-0.049		331	ENSG00000102125.16	TAZ	chrX	+	154419542	154420094	154419542	154419623	154420031	154420094	557	0.0604551	0.321586	0.69,0.431	0.332,0.303	0.243	1601	ENSG00000203875.13	SNHG5	chr6	-	85676984	85677191	85677092	85677191	85666003	85666147	0.264049	0.944764	0.935,0.831	1.0,1.0
16109	ENSG00000148204.12	CRB2	chr9	+	123367572	123367686	123367171	123367357	123370107	123370980	263	0.00159192	0.0546552	1.0,1.0	0.891,0.971	0.069		6363	ENSG00000241973.11	PI4KA	chr22	-	20733735	20734194	20733735	20733843	20734042	20734194	348	0.0603986	0.321586	0.461,0.329	0.067,0.237	0.243	1831	ENSG00000135316.19	SYNCRIP	chr6	-	85622481	85622687	85622586	85622687	85619267	85619417	0.265184	0.944764	1.0,1.0	1.0,0.846
8011	ENSG00000221926.13	TRIM16	chr17	-	15632508	15632674	15631618	15631714	15636035	15636143	315	0.00159765	0.0547901	1.0,1.0	0.85,0.825	0.163		6295	ENSG00000136319.12	TTC5	chr14	-	20291982	20295526	20291982	20292127	20295311	20295526	3333	0.0606955	0.322501	0.176,0.25	0.154,0.107	0.082	2687	ENSG00000108384.15	RAD51C	chr17	+	58692601	58693650	58692601	58692788	58694930	58695189	0.265517	0.944764	0.261,0.089	0.269,0.205
38987	ENSG00000171163.16	ZNF692	chr1	-	248850862	248850947	248850681	248850781	248853936	248854051	234	0.00161627	0.0553663	0.024,0.0	0.118,0.105	-0.099		5857	ENSG00000112531.17	QKI	chr6	+	163563419	163570145	163563419	163563719	163564666	163570145	1096	0.0609895	0.323334	0.525,0.502	0.614,0.57	-0.078	3405	ENSG00000163629.13	PTPN13	chr4	+	86764592	86764739	86764592	86764724	86765394	86765488	0.264747	0.944764	0.272,0.185	0.146,0.146
53522	ENSG00000140396.13	NCOA2	chr8	-	70144641	70144848	70141183	70141399	70148272	70148483	356	0.00162635	0.0555712	0.786,0.765	0.968,0.888	-0.152		6727	ENSG00000147852.17	VLDLR	chr9	+	2647473	2648347	2647473	2647592	2648207	2648347	764	0.0609498	0.323334	0.518,0.251	0.163,0.192	0.207	5671	ENSG00000128596.17	CCDC136	chr7	+	128801185	128801509	128801185	128801473	128804649	128804761	0.264421	0.944764	0.326,0.392	0.563,0.446
55397	ENSG00000232000.3	CLCN3P1	chr9	-	14990227	14990345	14989299	14989340	14992528	14993155	267	0.00162773	0.0555712	0.626,1.0	0.309,0.527	0.395		3945	ENSG00000160055.20	TMEM234	chr1	-	32216199	32216947	32216199	32216517	32216888	32216947	520	0.061134	0.323735	0.83,1.0	0.92,0.546	0.182	5760	ENSG00000127914.19	AKAP9	chr7	+	92070029	92070206	92070029	92070182	92070904	92071009	0.264196	0.944764	0.583,0.891	0.281,0.795
65859	ENSG00000198270.13	TMEM116	chr12	-	112003799	112003863	111991743	111991889	112005256	112005303	213	0.00162531	0.0555712	0.0,0.412	1.0,0.259	-0.423		740	ENSG00000130811.12	EIF3G	chr19	-	10118867	10119171	10118867	10118956	10119087	10119171	280	0.0612099	0.323773	0.096,0.044	0.0,0.049	0.046	6305	ENSG00000134825.16	TMEM258	chr11	-	61790374	61790602	61790422	61790602	61789784	61789990	0.263718	0.944764	1.0,0.431	1.0,0.431
6555	ENSG00000258890.7	CEP95	chr17	+	64527110	64527264	64526070	64526200	64529287	64529427	303	0.00163812	0.0558632	0.757,0.913	0.914,1.0	-0.122		6740	ENSG00000075415.15	SLC25A3	chr12	+	98593685	98594135	98593685	98593740	98593974	98594135	383	0.0614542	0.324701	0.038,0.052	0.083,0.053	-0.023	7330	ENSG00000139651.11	ZNF740	chr12	+	53181676	53182190	53181676	53181992	53185386	53185476	0.265594	0.944764	0.3,1.0	0.682,1.0
27061	ENSG00000144554.13	FANCD2	chr3	+	10064355	10064429	10063791	10063911	10064728	10064875	223	0.00164547	0.0560509	1.0,1.0	0.438,1.0	0.281		153	ENSG00000005302.19	MSL3	chrX	+	11763779	11765729	11763779	11763938	11765466	11765729	1677	0.0615931	0.325071	0.33,0.18	0.374,0.419	-0.141	335	ENSG00000124155.18	PIGT	chr20	+	45420527	45421583	45420527	45420693	45424215	45424381	0.266375	0.945683	0.882,0.785	1.0,0.843
17996	ENSG00000091136.15	LAMB1	chr7	-	107932173	107932493	107931355	107931500	107935414	107935656	469	0.00164873	0.0560992	1.0,0.972	0.848,0.813	0.155		5661	ENSG00000185000.12	DGAT1	chr8	-	144318094	144318362	144318094	144318169	144318260	144318362	240	0.0620351	0.327037	0.018,0.037	0.081,0.06	-0.043	869	ENSG00000266173.7	STRADA	chr17	-	63704340	63704582	63704431	63704582	63704004	63704047	0.266572	0.945683	0.933,0.767	0.805,0.939
42286	ENSG00000115525.18	ST3GAL5	chr2	-	85852859	85853000	85847860	85848204	85861180	85861231	290	0.00165091	0.0561106	0.0,0.093	0.507,0.204	-0.309		5081	ENSG00000138035.15	PNPT1	chr2	-	55644636	55645432	55644636	55644720	55645348	55645432	777	0.0622542	0.327826	0.0,0.024	0.06,0.039	-0.038	4746	ENSG00000111678.11	C12orf57	chr12	+	6944475	6944652	6944475	6944565	6945770	6946002	0.266747	0.945683	0.932,0.95	0.885,0.946
36438	ENSG00000176142.13	TMEM39A	chr3	-	119458017	119458240	119452446	119452530	119461961	119462008	372	0.00165777	0.0562809	1.0,0.925	0.828,0.762	0.168		1083	ENSG00000173757.10	STAT5B	chr17	-	42210170	42210497	42210170	42210301	42210402	42210497	250	0.0628552	0.328084	0.036,0.076	0.093,0.11	-0.046	298	ENSG00000102125.16	TAZ	chrX	+	154413206	154413352	154413206	154413252	154413481	154413567	0.267389	0.946113	0.515,0.166	0.489,0.642
5546	ENSG00000141431.13	ASXL3	chr18	+	33626872	33627070	33607593	33607676	33644893	33645002	347	0.00166251	0.056351	1.0,1.0	1.0,0.177	0.411		1236	ENSG00000072778.20	ACADVL	chr17	+	7220121	7220676	7220121	7220197	7220463	7220676	415	0.0628456	0.328084	0.174,0.103	0.07,0.088	0.059	969	ENSG00000131470.15	PSMC3IP	chr17	-	42577079	42577302	42577212	42577302	42574098	42574210	0.267464	0.946113	0.07,0.102	0.26,0.117
53868	ENSG00000121350.16	PYROXD1	chr12	+	21462007	21462125	21460902	21461154	21462739	21462746	267	0.00166354	0.056351	1.0,1.0	1.0,0.0	0.5		2115	ENSG00000111642.16	CHD4	chr12	-	6583026	6583378	6583026	6583113	6583197	6583378	233	0.0626174	0.328084	0.079,0.082	0.113,0.253	-0.102	914	ENSG00000159210.10	SNF8	chr17	-	48936130	48936242	48936169	48936242	48933204	48933346	0.267774	0.946155	0.047,0.284	0.0,0.102
40243	ENSG00000051825.15	MPHOSPH9	chr12	-	123162114	123162192	123161135	123161383	123163013	123163036	227	0.00167338	0.0566213	0.0,0.396	1.0,0.621	-0.613		3965	ENSG00000197530.13	MIB2	chr1	+	1628018	1628399	1628018	1628179	1628272	1628399	242	0.0628601	0.328084	0.552,0.183	0.156,0.11	0.235	1146	ENSG00000166822.13	TMEM170A	chr16	-	75451668	75451839	75451737	75451839	75443053	75447688	0.268265	0.946837	0.618,0.745	0.578,0.586
67201	ENSG00000283503.2	LINC01902	chr18	+	39870829	39875941	39868887	39868965	39876387	39876450	5261	0.00167635	0.0566587	1.0,1.0	0.318,1.0	0.341		4416	ENSG00000175390.15	EIF3F	chr11	+	7994425	7995118	7994425	7994517	7994981	7995118	613	0.0627122	0.328084	0.01,0.01	0.004,0.037	-0.01	1587	ENSG00000134291.12	TMEM106C	chr12	+	47966088	47966229	47966088	47966172	47966682	47966732	0.269693	0.947659	0.608,0.591	0.643,0.687
19688	ENSG00000055950.16	MRPL43	chr10	-	100983947	100984074	100983754	100983817	100986748	100986975	276	0.00168179	0.0567386	0.213,0.351	0.045,0.0	0.259		4658	ENSG00000110619.18	CARS1	chr11	-	3001969	3002600	3001969	3002053	3002540	3002600	636	0.062414	0.328084	0.177,0.197	0.072,0.174	0.064	3931	ENSG00000134253.10	TRIM45	chr1	-	117118033	117118767	117118087	117118767	117116615	117116745	0.269657	0.947659	0.869,0.911	1.0,0.614
53203	ENSG00000096093.16	EFHC1	chr6	+	52481545	52481662	52479639	52479787	52488556	52488675	266	0.00168244	0.0567386	1.0,0.0	1.0,1.0	-0.5		7589	ENSG00000087053.20	MTMR2	chr11	-	95862271	95865676	95862271	95862366	95865600	95865676	3383	0.0627304	0.328084	0.079,0.076	0.087,0.157	-0.044	5099	ENSG00000089009.16	RPL6	chr12	-	112409040	112409574	112409492	112409574	112408419	112408656	0.268802	0.947659	1.0,1.0	1.0,0.331
19414	ENSG00000073792.16	IGF2BP2	chr3	-	185672540	185672669	185658340	185658409	185675295	185675431	278	0.00168787	0.0568586	0.733,0.686	0.568,0.59	0.131		8267	ENSG00000100889.12	PCK2	chr14	+	24098202	24098678	24098202	24098387	24098474	24098678	236	0.0625759	0.328084	0.0,0.387	0.387,0.0	0	5579	ENSG00000104218.16	CSPP1	chr8	+	67113804	67115264	67113804	67113862	67115913	67116122	0.269118	0.947659	0.055,0.03	0.038,0.077
9050	ENSG00000039523.20	RIPOR1	chr16	+	67529636	67529859	67528880	67528914	67538423	67538550	372	0.00169389	0.0569353	1.0,0.762	0.616,0.616	0.265		4911	ENSG00000107331.17	ABCA2	chr9	-	137022701	137023052	137022701	137022865	137022940	137023052	224	0.0630048	0.328475	0.25,0.129	0.16,0.0	0.11	5013	ENSG00000169714.17	CNBP	chr3	-	129171633	129171771	129171654	129171771	129171445	129171538	0.270126	0.948131	0.416,0.483	0.5,0.52
62959	ENSG00000128536.16	CDHR3	chr7	+	106020372	106020544	106015926	106016025	106022197	106022448	321	0.00169209	0.0569353	0.582,1.0	1.0,0.072	0.255		2335	ENSG00000185813.11	PCYT2	chr17	-	81907553	81907857	81907553	81907598	81907772	81907857	323	0.0631537	0.328888	0.077,0.144	0.235,0.316	-0.165	3324	ENSG00000130816.17	DNMT1	chr19	-	10166591	10166685	10166597	10166685	10163325	10163360	0.270827	0.949541	0.093,0.023	0.0,0.0
32675	ENSG00000106070.20	GRB10	chr7	-	50710874	50710990	50705139	50705323	50732271	50732368	265	0.00170164	0.0571325	0.0,1.0	1.0,1.0	-0.5		429	ENSG00000125875.15	TBC1D20	chr20	-	439107	442043	439107	439295	440247	442043	1101	0.0633382	0.328927	0.051,0.097	0.016,0.081	0.025	2014	ENSG00000135506.16	OS9	chr12	+	57718992	57720263	57718992	57719182	57720405	57720518	0.272281	0.952561	0.075,0.099	0.128,0.125
65250	ENSG00000139292.13	LGR5	chr12	+	71572849	71572921	71571263	71571579	71577924	71577996	221	0.00170652	0.0572334	1.0,1.0	0.31,1.0	0.345		4754	ENSG00000109111.15	SUPT6H	chr17	+	28700345	28701128	28700345	28700512	28700940	28701128	577	0.0633441	0.328927	0.046,0.077	0.058,0.02	0.022	4136	ENSG00000198198.17	SZT2	chr1	+	43419733	43419961	43419733	43419944	43420152	43420323	0.272889	0.952561	0.082,0.23	0.0,0.0
7159	ENSG00000108312.15	UBTF	chr17	-	44208618	44209001	44207863	44207911	44209351	44209422	532	0.00171506	0.0574563	0.123,0.583	0.627,1.0	-0.461		5984	ENSG00000107175.12	CREB3	chr9	+	35732995	35733282	35732995	35733143	35733214	35733282	220	0.0633706	0.328927	0.703,0.404	0.575,0.101	0.216	7545	ENSG00000066427.24	ATXN3	chr14	-	92080952	92081061	92080964	92081061	92070937	92071053	0.272854	0.952561	0.134,0.117	0.0,0.0
42251	ENSG00000186566.13	GPATCH8	chr17	-	44464471	44464544	44436477	44436545	44474828	44474903	222	0.00172069	0.0575183	0.858,0.744	1.0,1.0	-0.199		8253	ENSG00000129460.16	NGDN	chr14	+	23475170	23475642	23475170	23475308	23475557	23475642	398	0.0635347	0.329095	0.171,0.108	0.093,0.045	0.071	7721	ENSG00000133706.19	LARS1	chr5	-	146149551	146149699	146149621	146149699	146144623	146144709	0.272745	0.952561	0.254,0.254	1.0,0.145
49336	ENSG00000088833.18	NSFL1C	chr20	-	1455713	1455719	1454966	1455132	1458199	1458274	155	0.00171939	0.0575183	0.413,0.658	0.129,0.155	0.393		8346	ENSG00000009830.13	POMT2	chr14	-	77283796	77285041	77283796	77283873	77284949	77285041	1225	0.0635427	0.329095	0.333,0.763	0.286,0.24	0.285	2038	ENSG00000172530.21	BANP	chr16	+	87975047	87975207	87975047	87975185	87981035	87981127	0.274576	0.956343	0.0,0.034	0.104,0.046
41571	ENSG00000178568.15	ERBB4	chr2	-	211657753	211657828	211630461	211630594	211665322	211665477	224	0.001736	0.0579663	0.919,0.905	1.0,1.0	-0.088		6074	ENSG00000223705.9	NSUN5P1	chr7	+	75415980	75416191	75415980	75416030	75416102	75416191	221	0.0637645	0.329882	0.979,0.884	1.0,0.948	-0.042	5488	ENSG00000104231.11	ZFAND1	chr8	-	81721226	81721295	81721248	81721295	81718181	81718224	0.274279	0.956343	0.859,0.736	0.635,0.592
10889	ENSG00000178761.15	FAM219B	chr15	-	74901949	74902063	74899991	74900137	74902603	74902786	263	0.00174091	0.0579673	1.0,0.0	1.0,1.0	-0.5		4515	ENSG00000004455.17	AK2	chr1	-	33007985	33013402	33007985	33010833	33013206	33013402	2522	0.0639106	0.330275	0.351,0.326	0.256,0.238	0.092	3289	ENSG00000164039.15	BDH2	chr4	-	103085698	103086540	103086479	103086540	103085348	103085462	0.275369	0.958055	0.196,0.197	0.16,0.159
32936	ENSG00000005448.17	WDR54	chr2	+	74423477	74423531	74423190	74423385	74423854	74423982	203	0.00174174	0.0579673	0.89,0.846	0.957,1.0	-0.11		484	ENSG00000039650.12	PNKP	chr19	-	49864178	49864403	49864178	49864236	49864323	49864403	236	0.0640954	0.330505	0.05,0.165	0.457,0.121	-0.182	2290	ENSG00000166845.15	C18orf54	chr18	+	54361642	54362431	54361642	54361891	54362770	54362921	0.276938	0.96246	0.954,0.959	1.0,1.0
59286	ENSG00000108219.15	TSPAN14	chr10	+	80504727	80504778	80489216	80489314	80509300	80509471	200	0.00173965	0.0579673	0.0,1.0	0.598,1.0	-0.299		3575	ENSG00000155363.18	MOV10	chr1	+	112698286	112699810	112698286	112698789	112699684	112699810	1044	0.0640535	0.330505	0.524,0.338	0.644,0.576	-0.179	3611	ENSG00000159352.16	PSMD4	chr1	+	151266003	151266121	151266003	151266112	151266307	151266439	0.277277	0.962583	0.103,0.034	0.076,0.124
13088	ENSG00000095564.14	BTAF1	chr10	+	91956527	91956657	91953736	91953873	91957224	91957293	279	0.00174512	0.0580162	0.774,0.965	1.0,1.0	-0.131		8396	ENSG00000136448.13	NMT1	chr17	+	45103708	45104996	45103708	45103876	45104858	45104996	1131	0.0644722	0.331722	0.028,0.019	0.049,0.043	-0.022	5481	ENSG00000101361.17	NOP56	chr20	+	2655933	2656214	2655933	2656034	2656400	2656549	0.278015	0.964088	0.333,0.324	0.214,0.335
62507	ENSG00000149256.16	TENM4	chr11	-	78778601	78778628	78770991	78771138	78786897	78787083	176	0.00174741	0.058029	0.082,0.297	0.0,0.05	0.165		8415	ENSG00000224078.15	SNHG14	chr15	+	25053827	25055230	25053827	25053967	25055073	25055230	1255	0.0644286	0.331722	0.839,0.851	0.613,0.633	0.222	4394	ENSG00000135486.19	HNRNPA1	chr12	+	54282799	54282932	54282799	54282874	54283078	54283234	0.281076	0.97364	0.59,0.49	0.866,0.419
21765	ENSG00000087470.19	DNM1L	chr12	+	32738263	32738296	32737864	32737942	32740063	32740240	182	0.00175432	0.058195	0.851,0.891	1.0,1.0	-0.129		4397	ENSG00000058673.17	ZC3H11A	chr1	+	203801574	203803016	203801574	203801628	203802956	203803016	1477	0.0645972	0.332003	0.893,0.927	0.952,0.975	-0.053	3263	ENSG00000164418.22	GRIK2	chr6	+	101686179	101686353	101686179	101686330	101799647	101799791	0.283641	0.979317	1.0,1.0	1.0,0.935
19528	ENSG00000182473.22	EXOC7	chr17	-	76097795	76098018	76092314	76094581	76101270	76101376	372	0.00175704	0.0582216	1.0,0.981	0.923,0.934	0.062		6100	ENSG00000106105.15	GARS1	chr7	+	30621392	30622462	30621392	30621500	30622316	30622462	965	0.0648397	0.332886	0.236,0.101	0.067,0.104	0.083	5307	ENSG00000206573.9	THUMPD3-AS1	chr3	-	9390884	9391826	9391678	9391826	9390289	9390497	0.28347	0.979317	0.768,0.801	0.584,0.796
28731	ENSG00000127483.19	HP1BP3	chr1	-	20780344	20780540	20779811	20779911	20787194	20787307	345	0.00176061	0.0582765	1.0,0.913	0.826,0.849	0.119		938	ENSG00000129667.13	RHBDF2	chr17	-	76478805	76479277	76478805	76479009	76479081	76479277	221	0.0655077	0.33522	0.403,0.0	0.403,0.403	-0.202	7379	ENSG00000166986.15	MARS1	chr12	+	57515919	57516158	57515919	57515991	57516244	57516337	0.28333	0.979317	0.255,0.179	0.288,0.347
60749	ENSG00000166444.19	DENND2B	chr11	-	8831555	8831688	8811246	8811335	8870953	8871088	282	0.00176947	0.0585059	0.293,0.185	0.0,0.096	0.191		3711	ENSG00000169359.16	SLC33A1	chr3	-	155833467	155834041	155833467	155833585	155833856	155834041	420	0.065389	0.33522	1.0,0.415	1.0,0.415	0	6507	ENSG00000119383.21	PTPA	chr9	+	129120512	129120628	129120512	129120610	129123051	129123138	0.284613	0.981607	0.0,0.062	0.0,0.0
541	ENSG00000230590.11	FTX	chrX	-	74285914	74286170	74281701	74281848	74293351	74293574	405	0.00177153	0.0585106	1.0,1.0	0.269,1.0	0.365		6046	ENSG00000100722.20	ZC3H14	chr14	+	88609266	88609803	88609266	88609403	88609726	88609803	472	0.0654741	0.33522	0.821,0.903	1.0,0.877	-0.077	7731	ENSG00000204842.18	ATXN2	chr12	-	111519831	111520076	111519878	111520076	111518248	111518427	0.285098	0.982211	0.055,0.043	0.123,0.06
69057	ENSG00000078304.19	PPP2R5C	chr14	+	101917830	101917947	101912400	101912473	101925140	101925307	266	0.00177602	0.058595	0.797,1.0	0.599,0.583	0.308		5258	ENSG00000204469.13	PRRC2A	chr6	+	31637233	31637771	31637233	31637324	31637445	31637771	270	0.0658018	0.33636	0.106,0.079	0.145,0.129	-0.045	3489	ENSG00000038382.20	TRIO	chr5	+	14487463	14488260	14487463	14487730	14492566	14492814	0.285699	0.983215	0.949,0.948	0.918,1.0
19632	ENSG00000205981.8	DNAJC19	chr3	-	180986947	180987022	180985925	180985996	180988022	180988096	224	0.00177958	0.0586492	0.25,0.21	0.571,1.0	-0.555		1734	ENSG00000180979.10	LRRC57	chr15	-	42547260	42548244	42547260	42547529	42548105	42548244	725	0.0660332	0.337177	0.054,0.093	0.046,0.027	0.037	2179	ENSG00000072310.18	SREBF1	chr17	-	17817547	17817916	17817695	17817916	17817255	17817457	0.287426	0.986521	0.216,0.334	0.354,0.385
10256	ENSG00000103275.21	UBE2I	chr16	+	1312346	1312558	1309677	1309773	1314019	1314096	361	0.00178651	0.05875	0.04,0.109	0.171,0.242	-0.132		4028	ENSG00000174080.12	CTSF	chr11	-	66564886	66565927	66564886	66565006	66565670	66565927	813	0.0661911	0.337253	0.423,0.058	0.02,0.035	0.213	2603	ENSG00000049883.15	PTCD2	chr5	+	72320372	72321179	72320372	72320509	72322171	72322264	0.288215	0.986521	0.0,0.083	1.0,0.0
12408	ENSG00000112701.18	SENP6	chr6	+	75702644	75703072	75697424	75697517	75709526	75709630	577	0.00178545	0.05875	0.984,1.0	0.948,0.893	0.072		4297	ENSG00000121073.15	SLC35B1	chr17	-	49705865	49706309	49705865	49705896	49706203	49706309	456	0.0661231	0.337253	0.047,0.093	0.117,0.118	-0.047	4152	ENSG00000070081.17	NUCB2	chr11	+	17276740	17276848	17276740	17276828	17282788	17282943	0.287933	0.986521	0.219,0.172	0.15,0.117
12028	ENSG00000221926.13	TRIM16	chr17	-	15677175	15677280	15642720	15642816	15680864	15680953	254	0.00179107	0.0588069	0.468,0.37	0.128,0.0	0.355		1358	ENSG00000168701.19	TMEM208	chr16	+	67228494	67228881	67228494	67228631	67228796	67228881	314	0.0665597	0.337777	0.624,0.232	1.0,0.487	-0.316	5350	ENSG00000115317.12	HTRA2	chr2	+	74531338	74531411	74531338	74531371	74531596	74531702	0.287709	0.986521	0.122,0.035	0.125,0.0
30168	ENSG00000223960.7	CHROMR	chr2	+	178426365	178426661	178413634	178414113	178430694	178430889	445	0.00179222	0.0588069	1.0,0.626	0.418,0.369	0.419		3384	ENSG00000160766.14	GBAP1	chr1	-	155217239	155218049	155217239	155217373	155217963	155218049	739	0.0665044	0.337777	0.535,0.554	0.428,0.325	0.168	6512	ENSG00000130713.16	EXOSC2	chr9	+	130697581	130698251	130697581	130697627	130699328	130699394	0.287833	0.986521	1.0,1.0	0.366,1.0
68509	ENSG00000017260.20	ATP2C1	chr3	+	130894589	130894775	130894014	130894337	130930415	130930526	335	0.00179404	0.0588069	0.773,0.848	1.0,1.0	-0.19		4254	ENSG00000127054.21	INTS11	chr1	-	1312225	1312700	1312225	1312368	1312592	1312700	373	0.0664612	0.337777	0.615,0.545	0.666,1.0	-0.253	4085	ENSG00000163714.18	U2SURP	chr3	+	143021349	143021385	143021349	143021382	143021472	143021555	0.28998	0.991495	0.531,0.489	0.601,0.549
18170	ENSG00000131374.14	TBC1D5	chr3	-	17586352	17586557	17562018	17562142	17622647	17622765	354	0.00180617	0.0591408	0.252,0.558	0.627,1.0	-0.408		8110	ENSG00000136104.21	RNASEH2B	chr13	+	50947986	50949505	50947986	50948068	50949462	50949505	1543	0.0665806	0.337777	0.132,0.279	0.132,0.013	0.133	3180	ENSG00000183258.12	DDX41	chr5	-	177514553	177514837	177514700	177514837	177513684	177513847	0.291606	0.995979	0.04,0.04	0.0,0.0
[truncated: 29,490 more rows]
[truncated: 126 more columns]
