# Supplementary material for: TREX tetramer disruption alters RNA processing necessary for corticogenesis in THOC6 Intellectual Disability Syndrome
Source: Nat Commun. 2024 Feb 22;15:1640. doi: 10.1038/s41467-024-45948-y (PMC10884030; doi:10.1038/s41467-024-45948-y)
Supplement: Supplementary file 5 — Supplementary Data 3 [file 41467_2024_45948_MOESM5_ESM.xlsx]

## Sheet: rMATS
SE																								RI																								A5SS
ID	GeneID	geneSymbol	chr	strand	exonStart_0base	exonEnd	upstreamES	upstreamEE	downstreamES	downstreamEE	ID	IJC_SAMPLE_1	SJC_SAMPLE_1	IJC_SAMPLE_2	SJC_SAMPLE_2	IncFormLen	SkipFormLen	PValue	FDR	IncLevel1	IncLevel2	IncLevelDifference		ID	GeneID	geneSymbol	chr	strand	riExonStart_0base	riExonEnd	upstreamES	upstreamEE	downstreamES	downstreamEE	ID	IJC_SAMPLE_1	SJC_SAMPLE_1	IJC_SAMPLE_2	SJC_SAMPLE_2	IncFormLen	SkipFormLen	PValue	FDR	IncLevel1	IncLevel2	IncLevelDifference		ID	GeneID
234	ENSMUSG00000069045.12	Ddx3y	chrY	-	1282900	1282948	1280309	1280439	1284321	1284382	234	7,5,7	0,1,0	3,9,6	2,0,0	197	149	0.838802	1	1.0,0.791,1.0	0.532,1.0,1.0	0.086		2	ENSMUSG00000038344.15	Txlng	chrX	-	161569612	161570674	161569612	161569687	161570554	161570674	2	8,10,16	5,8,9	10,10,11	6,4,6	1016	149	0.635397	1	0.19,0.155,0.207	0.196,0.268,0.212	-0.041		2861	ENSMUSG00000048832.10
235	ENSMUSG00000069045.12	Ddx3y	chrY	-	1282900	1282968	1280309	1280439	1284321	1284382	235	0,0,0	0,1,0	0,1,0	2,0,0	217	149	1	1	NA,0.0,NA	0.0,1.0,NA	-0.5		6	ENSMUSG00000025262.9	Fam120c	chrX	+	150250295	150250852	150250295	150250434	150250794	150250852	6	4,0,4	8,0,4	1,3,2	3,6,2	509	149	1	1	0.128,NA,0.226	0.089,0.128,0.226	0.029		1788	ENSMUSG00000037514.19
236	ENSMUSG00000068457.15	Uty	chrY	-	1099581	1099752	1096860	1098573	1102764	1102891	236	10,6,10	0,0,1	6,15,22	0,0,0	320	149	1	1	1.0,1.0,0.823	1.0,1.0,1.0	-0.059		10	ENSMUSG00000025272.17	Tro	chrX	-	149433972	149434454	149433972	149434035	149434411	149434454	10	10,8,5	1,0,1	10,13,2	0,0,0	525	149	1	1	0.739,1.0,0.587	1.0,1.0,1.0	-0.225		466	ENSMUSG00000097039.9
238	ENSMUSG00000068457.15	Uty	chrY	-	1161174	1161230	1157906	1158634	1168089	1168185	238	3,0,1	15,20,15	0,0,2	28,22,29	205	149	0.906764	1	0.127,0.0,0.046	0.0,0.0,0.048	0.042		13	ENSMUSG00000067369.13	Trmt2b	chrX	-	133138891	133139335	133138891	133138991	133139215	133139335	13	0,1,0	3,2,2	0,0,0	0,1,0	373	149	1	1	0.0,0.166,0.0	NA,0.0,NA	0.055		3077	ENSMUSG00000020572.9
241	ENSMUSG00000068457.15	Uty	chrY	-	1224496	1224546	1199296	1199513	1239710	1239819	241	8,8,10	0,1,0	16,8,19	0,2,0	199	149	1	1	1.0,0.857,1.0	1.0,0.75,1.0	0.036		16	ENSMUSG00000031256.12	Cstf2	chrX	+	132970593	132974026	132970593	132970656	132973962	132974026	16	78,82,102	6,11,5	101,129,76	6,6,14	3455	149	0.995997	1	0.359,0.243,0.468	0.421,0.481,0.19	-0.007		1842	ENSMUSG00000028289.13
243	ENSMUSG00000068457.15	Uty	chrY	-	1226694	1226826	1224496	1224546	1239710	1239819	243	0,1,0	6,5,6	1,0,2	15,5,13	281	149	0.778824	1	0.0,0.096,0.0	0.034,0.0,0.075	-0.004		17	ENSMUSG00000031232.18	Magt1	chrX	-	105011689	105015085	105011689	105014632	105015041	105015085	17	38,39,57	0,1,1	62,36,47	1,1,4	558	149	1	1	1.0,0.912,0.938	0.943,0.906,0.758	0.081		1725	ENSMUSG00000039671.19
245	ENSMUSG00000068457.15	Uty	chrY	-	1239710	1239819	1224496	1224546	1245155	1245216	245	12,23,12	1,0,0	30,14,16	0,0,0	258	149	1	1	0.874,1.0,1.0	1.0,1.0,1.0	-0.042		26	ENSMUSG00000078122.5	F630028O10Rik	chrX	+	95284018	95287242	95284018	95284119	95284643	95287242	26	0,2,0	0,1,0	1,0,0	0,0,0	673	149	1	1	NA,0.307,NA	1.0,NA,NA	-0.693		2541	ENSMUSG00000039087.18
247	ENSMUSG00000069049.12	Eif2s3y	chrY	+	1011839	1011967	1011259	1011323	1012047	1012169	247	64,39,16	0,1,0	21,40,40	0,0,0	277	149	1	1	1.0,0.955,1.0	1.0,1.0,1.0	-0.015		27	ENSMUSG00000025151.17	Maged1	chrX	-	93580479	93580962	93580479	93580594	93580899	93580962	27	17,6,14	57,43,111	18,16,8	59,91,61	454	149	0.62822	1	0.089,0.044,0.04	0.091,0.055,0.041	-0.005		2603	ENSMUSG00000032067.7
250	ENSMUSG00000069049.12	Eif2s3y	chrY	+	1012047	1012169	1011839	1011967	1014633	1014792	250	59,45,11	0,0,0	16,36,35	0,0,3	271	149	0.82124	1	1.0,1.0,1.0	1.0,1.0,0.865	0.045		30	ENSMUSG00000043929.17	Klhl15	chrX	+	93278595	93279026	93278595	93278731	93278826	93279026	30	1,1,3	1,0,0	3,0,2	0,0,0	244	149	1	1	0.379,1.0,1.0	1.0,NA,1.0	-0.207		1999	ENSMUSG00000037730.14
251	ENSMUSG00000069049.12	Eif2s3y	chrY	+	1013378	1013473	1012047	1012169	1014633	1014792	251	24,25,18	7,9,2	12,21,23	0,11,2	244	149	0.369493	1	0.677,0.629,0.846	1.0,0.538,0.875	-0.087		35	ENSMUSG00000031398.14	Plxna3	chrX	+	73378648	73379104	73378648	73378763	73378903	73379104	35	6,14,5	3,5,16	17,11,9	13,9,7	289	149	0.731851	1	0.508,0.591,0.139	0.403,0.387,0.399	0.016		3224	ENSMUSG00000030849.19
252	ENSMUSG00000069049.12	Eif2s3y	chrY	+	1019985	1020155	1016056	1017508	1023301	1023474	252	43,31,7	0,0,0	12,40,40	0,2,0	319	149	1	1	1.0,1.0,1.0	1.0,0.903,1.0	0.032		37	ENSMUSG00000001962.9	Fam50a	chrX	+	73358469	73359178	73358469	73358569	73359032	73359178	37	2,5,1	9,10,10	2,11,0	8,8,21	612	149	0.770206	1	0.051,0.109,0.024	0.057,0.251,0.0	-0.041		3	ENSMUSG00000035299.17
253	ENSMUSG00000056673.15	Kdm5d	chrY	+	898549	898627	897787	898115	899427	899550	253	12,12,5	0,1,0	18,13,7	2,0,0	227	149	1	1	1.0,0.887,1.0	0.855,1.0,1.0	0.011		43	ENSMUSG00000031388.15	Naa10	chrX	-	72963107	72963475	72963107	72963146	72963359	72963475	43	11,2,3	1,1,0	4,6,11	0,0,1	362	149	1	1	0.819,0.452,1.0	1.0,1.0,0.819	-0.183		396	ENSMUSG00000023030.17
256	ENSMUSG00000035299.17	Mid1	chrX	+	168765472	168765537	168764880	168765029	168766951	168766971	256	0,0,0	29,13,31	1,1,0	22,45,38	214	149	1	1	0.0,0.0,0.0	0.031,0.015,0.0	-0.015		44	ENSMUSG00000031388.15	Naa10	chrX	-	72963107	72963475	72963107	72963152	72963359	72963475	44	11,2,2	60,61,93	3,6,9	88,75,118	356	149	0.718576	1	0.071,0.014,0.009	0.014,0.032,0.031	0.006		551	ENSMUSG00000034729.17
259	ENSMUSG00000031358.18	Msl3	chrX	-	167455258	167455341	167454790	167454886	167456723	167456894	259	5,1,3	5,7,3	11,2,3	6,10,15	232	149	0.89692	1	0.391,0.084,0.391	0.541,0.114,0.114	0.032		46	ENSMUSG00000031389.18	Arhgap4	chrX	-	72943704	72944075	72943704	72943789	72943883	72944075	46	0,1,1	0,0,2	0,0,0	0,2,0	243	149	1	1	NA,1.0,0.235	NA,0.0,NA	0.617		704	ENSMUSG00000057181.16
261	ENSMUSG00000025742.6	Prps2	chrX	-	166133510	166133670	166129317	166131994	166135131	166135305	261	68,49,68	0,0,1	46,63,63	0,0,0	309	149	1	1	1.0,1.0,0.97	1.0,1.0,1.0	-0.01		50	ENSMUSG00000031340.9	Gabre	chrX	-	71308124	71308345	71308124	71308214	71308310	71308345	50	2,3,0	2,0,0	5,4,2	0,0,0	245	149	1	1	0.378,1.0,NA	1.0,1.0,1.0	-0.311		2444	ENSMUSG00000022359.11
263	ENSMUSG00000079317.11	Trappc2	chrX	+	165229786	165229898	165223569	165223835	165232783	165232899	263	6,6,15	0,1,0	6,10,8	0,0,0	261	149	1	1	1.0,0.774,1.0	1.0,1.0,1.0	-0.075		57	ENSMUSG00000058254.13	Tspan7	chrX	+	10456374	10461593	10456374	10456458	10461517	10461593	57	16,10,28	10,5,16	36,22,17	16,13,22	5208	149	0.698852	1	0.044,0.054,0.048	0.06,0.046,0.022	0.006		1120	ENSMUSG00000044573.17
264	ENSMUSG00000040586.9	Ofd1	chrX	-	165214684	165214715	165211523	165211631	165214797	165214866	264	7,6,8	0,0,1	8,12,16	0,0,0	180	149	1	1	1.0,1.0,0.869	1.0,1.0,1.0	-0.044		58	ENSMUSG00000058254.13	Tspan7	chrX	+	10456374	10462844	10456374	10461593	10461868	10462844	58	4,1,0	15,18,29	1,1,0	38,27,47	424	149	0.587395	1	0.086,0.019,0.0	0.009,0.013,0.0	0.028		1195	ENSMUSG00000026107.12
266	ENSMUSG00000040621.15	Gemin8	chrX	+	164961529	164961638	164953490	164953546	164961787	164961826	266	0,1,2	2,4,1	1,0,0	1,1,0	258	149	1	1	0.0,0.126,0.536	0.366,0.0,NA	0.038		70	ENSMUSG00000025077.15	Dclre1a	chr19	-	56528613	56530055	56528613	56528754	56529936	56530055	70	9,7,3	8,8,5	8,14,4	9,9,13	1331	149	0.798051	1	0.112,0.089,0.063	0.091,0.148,0.033	-0.003		1574	ENSMUSG00000041530.18
273	ENSMUSG00000031381.17	Piga	chrX	+	163210927	163211060	163205579	163205982	163211535	163211668	273	2,3,4	0,0,0	3,13,7	0,0,1	282	149	1	1	1.0,1.0,1.0	1.0,1.0,0.787	0.071		71	ENSMUSG00000084957.4	Bbip1	chr19	-	53920560	53922001	53920560	53920636	53921921	53922001	71	11,18,19	0,1,0	21,30,15	0,0,0	1434	149	1	1	1.0,0.652,1.0	1.0,1.0,1.0	-0.116		3255	ENSMUSG00000033799.11
274	ENSMUSG00000031370.13	Zrsr2	chrX	-	162722301	162722411	162718438	162719961	162723114	162723170	274	8,22,12	0,0,0	19,10,20	0,0,2	259	149	1	1	1.0,1.0,1.0	1.0,1.0,0.852	0.049		74	ENSMUSG00000025060.16	Slk	chr19	+	47610674	47611133	47610674	47610805	47611009	47611133	74	7,4,6	32,22,43	9,8,3	40,41,47	353	149	0.885683	1	0.085,0.071,0.056	0.087,0.076,0.026	0.008		1193	ENSMUSG00000026107.12
275	ENSMUSG00000031370.13	Zrsr2	chrX	-	162723114	162723170	162718438	162719961	162726095	162726309	275	1,1,3	0,0,0	0,0,2	1,0,0	205	149	1	1	1.0,1.0,1.0	0.0,NA,1.0	0.5		75	ENSMUSG00000025036.8	Sfxn2	chr19	+	46576373	46578640	46576373	46576449	46578579	46578640	75	18,24,10	0,1,0	39,34,15	0,0,0	2279	149	1	1	1.0,0.611,1.0	1.0,1.0,1.0	-0.13		2335	ENSMUSG00000030811.15
276	ENSMUSG00000031367.16	Ap1s2	chrX	+	162699470	162699579	162694324	162694503	162700701	162700839	276	24,11,24	0,0,2	21,15,20	0,0,0	258	149	1	1	1.0,1.0,0.874	1.0,1.0,1.0	-0.042		80	ENSMUSG00000024924.15	Vldlr	chr19	+	27194419	27195096	27194419	27194532	27194942	27195096	80	3,0,8	0,0,0	16,10,10	1,0,0	559	149	1	1	1.0,NA,1.0	0.81,1.0,1.0	0.063		1596	ENSMUSG00000023572.17
281	ENSMUSG00000031360.15	Ctps2	chrX	+	161686429	161686634	161684627	161684743	161693004	161693175	281	6,15,17	0,1,0	16,27,19	0,0,0	354	149	1	1	1.0,0.863,1.0	1.0,1.0,1.0	-0.046		90	ENSMUSG00000036372.15	Tmem258	chr19	+	10183787	10184664	10183787	10183897	10184527	10184664	90	15,16,8	159134211	14,17,10	165183219	779	149	0.829082	1	0.018,0.022,0.007	0.016,0.017,0.009	0.002		278	ENSMUSG00000024163.18
284	ENSMUSG00000031360.15	Ctps2	chrX	+	161783057	161783154	161779700	161779756	161794057	161794202	284	17,11,34	0,0,0	19,12,12	0,0,1	246	149	1	1	1.0,1.0,1.0	1.0,1.0,0.879	0.04		93	ENSMUSG00000024661.8	Fth1	chr19	+	9961544	9962049	9961544	9961691	9961923	9962049	93	8,2,11	194210318	0,9,7	203206302	381	149	0.947736	1	0.016,0.004,0.013	0.0,0.017,0.009	0.002		2022	ENSMUSG00000041654.16
285	ENSMUSG00000038344.15	Txlng	chrX	-	161590480	161590572	161580635	161580806	161594287	161594384	285	4,3,2	1,0,0	10,14,10	0,0,0	241	149	1	1	0.712,1.0,1.0	1.0,1.0,1.0	-0.096		94	ENSMUSG00000071644.11	Eef1g	chr19	+	8946525	8946870	8946525	8946589	8946727	8946870	94	25,22,27	208116702622	26,49,40	295331083428	287	149	1	1	0.006,0.007,0.005	0.005,0.008,0.006	0		772	ENSMUSG00000037369.18
290	ENSMUSG00000000037.18	Scml2	chrX	+	160026361	160026544	160024983	160025187	160029252	160029363	290	1,1,4	2,0,0	10,1,5	0,0,0	332	149	0.416746	1	0.183,1.0,1.0	1.0,1.0,1.0	-0.272		97	ENSMUSG00000051579.11	Tceal8	chrX	-	135072168	135072454	135072168	135072270	135072384	135072454	97	4,2,5	0,0,1	2,12,4	0,0,0	263	149	1	1	1.0,1.0,0.739	1.0,1.0,1.0	-0.087		652	ENSMUSG00000029833.18
291	ENSMUSG00000000037.18	Scml2	chrX	+	160038025	160038177	160029252	160029363	160039561	160041192	291	4,0,3	0,1,0	0,0,0	3,0,0	301	149	1	1	1.0,0.0,1.0	0.0,NA,NA	0.667		98	ENSMUSG00000071657.13	Bscl2	chr19	+	8817898	8820454	8817898	8818788	8820372	8820454	98	8,9,17	6,11,3	0,12,12	1,8,7	1733	149	0.69503	1	0.103,0.066,0.328	0.0,0.114,0.128	0.085		1698	ENSMUSG00000029060.18
293	ENSMUSG00000040990.18	Sh3kbp1	chrX	+	158600237	158600294	158599572	158599702	158611369	158611575	293	0,0,0	7,7,11	2,0,0	12,8,14	206	149	1	1	0.0,0.0,0.0	0.108,0.0,0.0	-0.036		101	ENSMUSG00000071657.13	Bscl2	chr19	+	8825030	8825346	8825030	8825097	8825277	8825346	101	2,0,4	12,3,10	1,6,1	15,9,5	329	149	0.649211	1	0.07,0.0,0.153	0.029,0.232,0.083	-0.04		2212	ENSMUSG00000035851.15
297	ENSMUSG00000040990.18	Sh3kbp1	chrX	+	158744760	158744889	158741208	158741318	158749209	158749478	297	1,7,6	2,0,1	14,8,13	1,0,1	278	149	1	1	0.211,1.0,0.763	0.882,1.0,0.874	-0.261		107	ENSMUSG00000108414.2	Snhg1	chr19	+	8703145	8703466	8703145	8703288	8703430	8703466	107	50,32,51	0,0,0	36,40,34	3,0,0	291	149	0.811875	1	1.0,1.0,1.0	0.86,1.0,1.0	0.047		2796	ENSMUSG00000020262.16
299	ENSMUSG00000031309.16	Rps6ka3	chrX	+	158061105	158061199	158038777	158039184	158062162	158062199	299	5,6,6	1,3,1	12,12,18	3,0,2	243	149	0.299111	1	0.754,0.551,0.786	0.71,1.0,0.847	-0.155		112	ENSMUSG00000024965.10	Fermt3	chr19	-	6980189	6980448	6980189	6980314	6980398	6980448	112	0,0,1	2,3,1	1,1,0	1,0,1	233	149	1	1	0.0,0.0,0.39	0.39,1.0,0.0	-0.333		3136	ENSMUSG00000021288.20
300	ENSMUSG00000031309.16	Rps6ka3	chrX	+	158061105	158061199	158038777	158039184	158068261	158068318	300	2,3,7	7,2,23	7,7,7	22,11,14	243	149	0.700265	1	0.149,0.479,0.157	0.163,0.281,0.235	0.035		113	ENSMUSG00000024960.10	Plcb3	chr19	-	6931748	6932130	6931748	6931835	6932072	6932130	113	3,3,10	3,2,3	10,7,8	6,1,4	386	149	0.667433	1	0.279,0.367,0.563	0.391,0.73,0.436	-0.116		1489	ENSMUSG00000021068.18
302	ENSMUSG00000031309.16	Rps6ka3	chrX	+	158062162	158062199	158038920	158039184	158068261	158068318	302	4,3,1	7,2,23	3,0,3	22,11,14	186	149	0.15314	1	0.314,0.546,0.034	0.098,0.0,0.147	0.216		114	ENSMUSG00000024960.10	Plcb3	chr19	-	6932574	6933274	6932574	6932725	6933081	6933274	114	3,0,5	17,12,7	6,5,2	23,11,37	505	149	0.873554	1	0.049,0.0,0.174	0.071,0.118,0.016	0.006		2839	ENSMUSG00000011257.20
308	ENSMUSG00000041552.8	Ptchd1	chrX	-	154405315	154405480	154369803	154370027	154405955	154406175	308	0,2,0	2,0,3	0,0,0	0,0,3	314	149	1	1	0.0,1.0,0.0	NA,NA,0.0	0.333		124	ENSMUSG00000024944.7	Arl2	chr19	-	6186008	6187670	6186008	6186089	6187507	6187670	124	39,42,48	37,35,43	62,89,36	56,44,70	1567	149	0.929577	1	0.091,0.102,0.096	0.095,0.161,0.047	-0.005		2910	ENSMUSG00000068329.13
309	ENSMUSG00000025287.16	Acot9	chrX	+	154047031	154047089	154045500	154045670	154052654	154052749	309	0,0,0	1,8,7	1,0,0	2,11,13	207	149	1	1	0.0,0.0,0.0	0.265,0.0,0.0	-0.088		125	ENSMUSG00000024787.15	Snx15	chr19	-	6173859	6174218	6173859	6173980	6174182	6174218	125	1,2,1	5,3,4	1,4,0	4,1,0	351	149	1	1	0.078,0.221,0.096	0.096,0.629,NA	-0.231		103	ENSMUSG00000025199.17
312	ENSMUSG00000086316.9	Nbdy	chrX	+	152508700	152508837	152506585	152506933	152524035	152524916	312	8,11,9	0,0,0	17,16,20	0,1,0	286	149	1	1	1.0,1.0,1.0	1.0,0.893,1.0	0.036		127	ENSMUSG00000024807.19	Syvn1	chr19	+	6098484	6098773	6098484	6098637	6098724	6098773	127	0,2,2	18,11,28	2,0,2	17,26,33	236	149	0.891546	1	0.0,0.103,0.043	0.069,0.0,0.037	0.013		2334	ENSMUSG00000030811.15
313	ENSMUSG00000086316.9	Nbdy	chrX	+	152509938	152510028	152508700	152508837	152511857	152511935	313	0,0,0	29,17,41	0,0,1	49,49,36	239	149	1	1	0.0,0.0,0.0	0.0,0.0,0.017	-0.006		132	ENSMUSG00000024941.10	Scyl1	chr19	-	5808827	5809174	5808827	5808888	5808967	5809174	132	13,2,2	30,37,46	2,4,9	29,41,40	228	149	0.895125	1	0.221,0.034,0.028	0.043,0.06,0.128	0.017		1321	ENSMUSG00000030271.15
317	ENSMUSG00000087403.10	Kantr	chrX	-	151103205	151103280	151081724	151081870	151110156	151110235	317	0,0,0	0,1,0	0,0,6	5,4,7	224	149	1	1	NA,0.0,NA	0.0,0.0,0.363	-0.121		134	ENSMUSG00000024940.12	Ltbp3	chr19	+	5796670	5797051	5796670	5796763	5796928	5797051	134	0,1,2	0,3,3	0,0,0	0,2,0	314	149	1	1	NA,0.137,0.24	NA,0.0,NA	0.189		1526	ENSMUSG00000024104.12
318	ENSMUSG00000025332.15	Kdm5c	chrX	+	151022625	151022748	151020628	151020706	151023021	151023192	318	89,62,101	4,0,10	116118124	4,7,12	272	149	0.503252	1	0.924,1.0,0.847	0.941,0.902,0.85	0.026		137	ENSMUSG00000056185.6	Snx32	chr19	-	5546343	5547053	5546343	5546430	5547013	5547053	137	19,10,16	0,0,0	15,7,12	1,1,0	732	149	1	1	1.0,1.0,1.0	0.753,0.588,1.0	0.22		106	ENSMUSG00000025007.14
319	ENSMUSG00000025332.15	Kdm5c	chrX	+	151036419	151036601	151031657	151031816	151036694	151036857	319	43,45,84	0,0,0	53,63,88	0,0,2	331	149	1	1	1.0,1.0,1.0	1.0,1.0,0.952	0.016		141	ENSMUSG00000024914.17	Drap1	chr19	-	5474209	5474461	5474209	5474303	5474388	5474461	141	1,1,1	170145178	3,1,4	191194190	234	149	1	1	0.004,0.004,0.004	0.01,0.003,0.013	-0.005		1019	ENSMUSG00000039463.15
320	ENSMUSG00000025332.15	Kdm5c	chrX	+	151053689	151053827	151053347	151053527	151054007	151054589	320	105,82,99	5,6,11	125141136	7,10,2	287	149	0.155358	1	0.916,0.876,0.824	0.903,0.88,0.972	-0.046		145	ENSMUSG00000024858.15	Grk2	chr19	-	4341266	4341669	4341266	4341358	4341617	4341669	145	5,7,3	33,16,29	2,8,2	10,23,24	408	149	0.962992	1	0.052,0.138,0.036	0.068,0.113,0.03	0.005		1132	ENSMUSG00000038784.14
321	ENSMUSG00000025332.15	Kdm5c	chrX	+	151054855	151054925	151054007	151054589	151055070	151055270	321	54,45,70	0,0,2	71,77,70	0,0,0	219	149	1	1	1.0,1.0,0.96	1.0,1.0,1.0	-0.013		150	ENSMUSG00000024830.18	Rps6kb2	chr19	-	4208608	4208918	4208608	4208716	4208801	4208918	150	7,5,4	1,0,0	2,9,12	2,0,0	234	149	0.639762	1	0.817,1.0,1.0	0.389,1.0,1.0	0.143		1481	ENSMUSG00000026860.17
322	ENSMUSG00000025332.15	Kdm5c	chrX	+	151054855	151054934	151054007	151054589	151055070	151055270	322	20,25,32	0,0,2	50,58,45	0,0,0	228	149	1	1	1.0,1.0,0.913	1.0,1.0,1.0	-0.029		151	ENSMUSG00000024830.18	Rps6kb2	chr19	-	4208608	4208918	4208608	4208716	4208827	4208918	151	11,5,4	10,11,12	3,9,14	17,9,12	260	149	0.787397	1	0.387,0.207,0.16	0.092,0.364,0.401	-0.034		2008	ENSMUSG00000022704.17
323	ENSMUSG00000041133.12	Smc1a	chrX	+	150805741	150805930	150799423	150799636	150806034	150806147	323	117,88,142	0,0,0	109138156	0,1,0	338	149	1	1	1.0,1.0,1.0	1.0,0.984,1.0	0.005		155	ENSMUSG00000024851.15	Pitpnm1	chr19	+	4156711	4157975	4156711	4156962	4157785	4157975	155	6,15,11	4,4,2	5,14,13	2,6,4	972	149	0.828807	1	0.187,0.365,0.457	0.277,0.263,0.333	0.045		2032	ENSMUSG00000035165.15
324	ENSMUSG00000041133.12	Smc1a	chrX	+	150806034	150806147	150799423	150799636	150809233	150809437	324	9,9,10	1,4,5	8,5,9	1,6,7	262	149	0.378796	1	0.837,0.561,0.532	0.82,0.322,0.422	0.122		156	ENSMUSG00000024851.15	Pitpnm1	chr19	+	4161581	4162014	4161581	4161698	4161865	4162014	156	2,0,0	1,2,2	1,0,0	3,1,2	316	149	0.851855	1	0.485,0.0,0.0	0.136,0.0,0.0	0.116		2255	ENSMUSG00000021432.16
325	ENSMUSG00000041133.12	Smc1a	chrX	+	150824322	150824464	150820586	150820693	150829655	150829801	325	59,60,91	0,0,0	79,80,59	0,0,3	291	149	1	1	1.0,1.0,1.0	1.0,1.0,0.91	0.03		158	ENSMUSG00000024866.11	Acy3	chr19	+	4038137	4038505	4038137	4038231	4038397	4038505	158	0,0,0	0,0,1	1,0,0	2,0,0	315	149	1	1	NA,NA,0.0	0.191,NA,NA	-0.191		2794	ENSMUSG00000001120.16
326	ENSMUSG00000041133.12	Smc1a	chrX	+	150841774	150841931	150830853	150830964	150842353	150842508	326	92,70,138	0,0,2	131168126	0,0,0	306	149	1	1	1.0,1.0,0.971	1.0,1.0,1.0	-0.01		173	ENSMUSG00000033032.16	Afap1l1	chr18	-	61876348	61876831	61876348	61876501	61876737	61876831	173	4,0,1	0,8,2	2,4,0	15,3,10	385	149	0.710565	1	1.0,0.0,0.162	0.049,0.34,0.0	0.258		2857	ENSMUSG00000079109.12
327	ENSMUSG00000025262.9	Fam120c	chrX	+	150164906	150164989	150159743	150159990	150182670	150182799	327	5,4,16	0,0,0	7,12,24	0,1,0	232	149	1	1	1.0,1.0,1.0	1.0,0.885,1.0	0.038		180	ENSMUSG00000024451.10	Arap3	chr18	-	38107417	38107734	38107417	38107555	38107670	38107734	180	0,1,0	5,8,5	0,0,2	15,9,10	264	149	1	1	0.0,0.066,0.0	0.0,0.0,0.101	-0.012		2385	ENSMUSG00000050914.17
333	ENSMUSG00000031290.15	Lrch2	chrX	-	146279762	146279828	146275034	146275083	146286379	146286487	333	10,8,8	12,17,18	18,0,14	14,16,11	215	149	0.925873	1	0.366,0.246,0.235	0.471,0.0,0.469	-0.031		183	ENSMUSG00000024474.8	Ik	chr18	+	36881923	36882337	36881923	36882038	36882266	36882337	183	12,12,9	88,70,128	15,13,13	112104119	377	149	0.806037	1	0.051,0.063,0.027	0.05,0.047,0.041	0.001		2665	ENSMUSG00000021156.18
334	ENSMUSG00000031290.15	Lrch2	chrX	-	146281283	146281361	146279762	146279828	146286379	146286466	334	0,3,1	6,5,4	1,1,3	13,0,11	227	149	0.760088	1	0.0,0.283,0.141	0.048,1.0,0.152	-0.259		184	ENSMUSG00000117679.2	Apbb3	chr18	-	36809669	36810045	36809669	36809675	36809917	36810045	184	12,16,4	0,0,0	11,12,19	0,1,0	391	149	1	1	1.0,1.0,1.0	1.0,0.821,1.0	0.06		3098	ENSMUSG00000002342.18
335	ENSMUSG00000031290.15	Lrch2	chrX	-	146286379	146286487	146275034	146275083	146291654	146291713	335	20,18,26	0,1,0	21,33,23	0,0,0	257	149	1	1	1.0,0.913,1.0	1.0,1.0,1.0	-0.029		192	ENSMUSG00000003779.17	Kif20a	chr18	+	34761437	34761632	34761437	34761475	34761557	34761632	192	60,57,68	0,0,0	35,50,71	0,3,0	231	149	1	1	1.0,1.0,1.0	1.0,0.915,1.0	0.028		654	ENSMUSG00000022335.18
338	ENSMUSG00000031278.13	Acsl4	chrX	-	141126302	141126453	141126069	141126193	141128423	141128562	338	24,21,26	0,0,0	34,20,29	0,1,0	300	149	1	1	1.0,1.0,1.0	1.0,0.909,1.0	0.03		193	ENSMUSG00000003779.17	Kif20a	chr18	+	34761727	34762006	34761727	34761839	34761937	34762006	193	2,12,1	47,37,66	3,5,6	34,49,60	247	149	0.707515	1	0.025,0.164,0.009	0.051,0.058,0.057	0.011		1333	ENSMUSG00000026867.20
339	ENSMUSG00000031278.13	Acsl4	chrX	-	141143382	141143432	141134374	141134611	141173300	141173500	339	2,7,9	0,0,1	2,2,2	0,0,0	199	149	1	1	1.0,1.0,0.871	1.0,1.0,1.0	-0.043		194	ENSMUSG00000003778.15	Brd8	chr18	-	34741470	34743002	34741470	34741680	34742857	34743002	194	122111107	49,48,67	135,123,80	48,53,62	1326	149	0.947457	1	0.219,0.206,0.152	0.24,0.207,0.127	0.001		2262	ENSMUSG00000034684.13
340	ENSMUSG00000031273.17	Col4a6	chrX	-	139955664	139955811	139955105	139955222	139957614	139957713	340	3,0,0	0,0,0	7,0,2	0,0,1	296	149	1	1	1.0,NA,NA	1.0,NA,0.502	0.249		195	ENSMUSG00000036501.8	Fam13b	chr18	-	34576953	34578493	34576953	34577055	34578329	34578493	195	11,3,9	26,12,14	3,6,9	10,12,19	1423	149	0.952906	1	0.042,0.026,0.063	0.03,0.05,0.047	0.001		1683	ENSMUSG00000026914.16
344	ENSMUSG00000031433.16	Rbm41	chrX	-	138868944	138869348	138855655	138855803	138894046	138894251	344	9,16,20	0,3,0	31,18,41	0,0,0	553	149	0.458302	1	1.0,0.59,1.0	1.0,1.0,1.0	-0.137		198	ENSMUSG00000040446.5	Rprd1a	chr18	-	24640161	24641148	24640161	24640288	24641050	24641148	198	22,17,7	26,21,37	24,15,12	30,36,39	911	149	0.706305	1	0.122,0.117,0.03	0.116,0.064,0.048	0.014		19	ENSMUSG00000025332.15
345	ENSMUSG00000031433.16	Rbm41	chrX	-	138892264	138892336	138868944	138869348	138894046	138894251	345	0,1,0	1,3,9	3,0,0	6,6,18	221	149	0.699882	1	0.0,0.183,0.0	0.252,0.0,0.0	-0.023		203	ENSMUSG00000024404.8	Riok3	chr18	+	12268908	12269895	12268908	12269024	12269749	12269895	203	4,14,3	6,2,0	8,14,6	2,0,5	874	149	0.624615	1	0.102,0.544,1.0	0.405,1.0,0.17	0.024		326	ENSMUSG00000022983.17
347	ENSMUSG00000086807.9	Platr21	chrX	-	138230185	138230242	138214405	138214473	138255752	138255850	347	1,0,0	0,0,0	0,3,0	2,0,0	206	149	1	1	1.0,NA,NA	0.0,1.0,NA	0.5		204	ENSMUSG00000024404.8	Riok3	chr18	+	12268908	12270092	12268908	12269895	12269984	12270092	204	2,7,0	14,13,21	1,6,2	28,11,19	238	149	0.893759	1	0.082,0.252,0.0	0.022,0.255,0.062	-0.002		1007	ENSMUSG00000028382.16
352	ENSMUSG00000087368.8	BC065397	chrX	+	135657242	135657369	135648071	135648197	135658849	135658930	352	4,3,8	4,5,2	4,8,5	4,3,3	276	149	0.669685	1	0.351,0.245,0.683	0.351,0.59,0.474	-0.045		205	ENSMUSG00000024234.8	Mtpap	chr18	+	4386952	4387179	4386952	4387007	4387127	4387179	205	14,20,32	0,0,0	34,40,42	1,0,0	269	149	1	1	1.0,1.0,1.0	0.95,1.0,1.0	0.017		1098	ENSMUSG00000033961.17
353	ENSMUSG00000087368.8	BC065397	chrX	+	135661166	135661324	135660604	135660667	135662739	135662837	353	2,8,5	0,0,3	9,11,5	0,0,0	307	149	0.293517	1	1.0,1.0,0.447	1.0,1.0,1.0	-0.184		206	ENSMUSG00000036438.15	Calm2	chr17	-	87743031	87743362	87743031	87743138	87743218	87743362	206	10,15,10	260238381	8,15,8	256257365	229	149	0.63472	1	0.024,0.039,0.017	0.02,0.037,0.014	0.003		2277	ENSMUSG00000035762.12
354	ENSMUSG00000087368.8	BC065397	chrX	+	135661166	135661324	135660604	135660667	135689269	135689366	354	1,4,4	0,0,0	3,9,4	0,1,0	307	149	1	1	1.0,1.0,1.0	1.0,0.814,1.0	0.062		209	ENSMUSG00000093460.10	Six3os1	chr17	-	85922075	85923171	85922075	85922155	85923021	85923171	209	64,53,72	5,2,3	136,99,92	6,3,7	1015	149	0.907175	1	0.653,0.796,0.779	0.769,0.829,0.659	-0.01		2829	ENSMUSG00000061904.13
355	ENSMUSG00000087368.8	BC065397	chrX	+	135662739	135662837	135660604	135660667	135689269	135689366	355	0,1,5	0,0,0	2,2,1	0,1,0	247	149	1	1	NA,1.0,1.0	1.0,0.547,1.0	0.151		211	ENSMUSG00000093460.10	Six3os1	chr17	-	85923021	85925062	85923021	85923262	85924709	85925062	211	63,38,68	0,0,0	143,124,86	1,0,0	1596	149	1	1	1.0,1.0,1.0	0.93,1.0,1.0	0.023		1187	ENSMUSG00000014856.13
356	ENSMUSG00000087368.8	BC065397	chrX	+	135662739	135662837	135661166	135661324	135689269	135689366	356	1,5,3	0,0,1	3,4,2	0,0,0	247	149	1	1	1.0,1.0,0.644	1.0,1.0,1.0	-0.119		214	ENSMUSG00000024073.17	Birc6	chr17	+	74868145	74869096	74868145	74868257	74869013	74869096	214	4,13,10	13,26,27	8,11,20	22,32,35	905	149	0.727281	1	0.048,0.076,0.057	0.056,0.054,0.086	-0.005		2051	ENSMUSG00000041420.19
357	ENSMUSG00000031422.17	Morf4l2	chrX	-	135636294	135636371	135633690	135635250	135640553	135640643	357	290311533	2,0,1	399493515	2,2,0	226	149	1	1	0.99,1.0,0.997	0.992,0.994,1.0	0		216	ENSMUSG00000024054.15	Smchd1	chr17	-	71665131	71665452	71665131	71665202	71665342	71665452	216	13,7,3	63,40,50	8,7,12	61,80,75	289	149	0.655404	1	0.096,0.083,0.03	0.063,0.043,0.076	0.009		607	ENSMUSG00000049643.16
359	ENSMUSG00000031422.17	Morf4l2	chrX	-	135640553	135640643	135636294	135636371	135641958	135642098	359	226256418	2,0,0	307381412	0,0,1	239	149	1	1	0.986,1.0,1.0	1.0,1.0,0.996	-0.003		217	ENSMUSG00000024048.16	Myl12a	chr17	-	71303104	71303890	71303104	71303266	71303691	71303890	217	4,4,5	166128224	9,7,5	232214253	574	149	1	1	0.006,0.008,0.006	0.01,0.008,0.005	-0.001		3185	ENSMUSG00000025873.17
361	ENSMUSG00000031422.17	Morf4l2	chrX	-	135641694	135641868	135640553	135640643	135641958	135642025	361	3,5,1	46,47,76	2,3,2	44,58,85	323	149	0.45368	1	0.029,0.047,0.006	0.021,0.023,0.011	0.009		219	ENSMUSG00000035842.11	Ddx11	chr17	+	66456025	66457047	66456025	66456308	66456962	66457047	219	22,24,24	18,6,9	13,26,19	2,18,12	803	149	0.850921	1	0.185,0.426,0.331	0.547,0.211,0.227	-0.014		2399	ENSMUSG00000036053.18
365	ENSMUSG00000072966.12	Gprasp2	chrX	+	134740493	134740621	134739782	134740011	134741141	134741218	365	1,1,9	0,0,4	5,1,8	0,0,0	277	149	0.117836	1	1.0,1.0,0.548	1.0,1.0,1.0	-0.151		221	ENSMUSG00000002668.9	Dennd1c	chr17	-	57373731	57374116	57373731	57373942	57374048	57374116	221	2,0,0	0,0,0	2,0,0	0,0,1	255	149	1	1	1.0,NA,NA	1.0,NA,0.0	0.5		3034	ENSMUSG00000061028.8
366	ENSMUSG00000072966.12	Gprasp2	chrX	+	134740531	134740621	134739854	134740011	134741141	134741218	366	0,2,3	0,0,4	3,5,4	0,0,0	239	149	1	1	NA,1.0,0.319	1.0,1.0,1.0	-0.341		222	ENSMUSG00000002668.9	Dennd1c	chr17	-	57377112	57377448	57377112	57377184	57377407	57377448	222	1,0,2	0,1,0	2,2,0	0,2,0	372	149	1	1	1.0,0.0,1.0	1.0,0.286,NA	0.024		121	ENSMUSG00000010110.18
367	ENSMUSG00000072966.12	Gprasp2	chrX	+	134741601	134741673	134741000	134741439	134741969	134742052	367	8,2,4	0,0,0	13,9,4	0,1,0	221	149	1	1	1.0,1.0,1.0	1.0,0.859,1.0	0.047		226	ENSMUSG00000013236.18	Ptprs	chr17	-	56735851	56736157	56735851	56735966	56736098	56736157	226	161137151	0,0,0	234186192	2,1,2	281	149	1	1	1.0,1.0,1.0	0.984,0.99,0.981	0.015		97	ENSMUSG00000025224.17
368	ENSMUSG00000043384.16	Gprasp1	chrX	+	134644311	134644363	134643481	134643727	134645247	134645324	368	4,9,8	5,9,4	9,3,5	2,2,7	201	149	0.576938	1	0.372,0.426,0.597	0.769,0.527,0.346	-0.082		236	ENSMUSG00000033475.16	Tomm6	chr17	-	47997664	47998213	47997664	47997987	47998112	47998213	236	3,5,1	8,6,9	4,2,4	13,5,6	274	149	0.816877	1	0.169,0.312,0.057	0.143,0.179,0.266	-0.017		2811	ENSMUSG00000090112.9
372	ENSMUSG00000033436.14	Armcx2	chrX	-	133708202	133708262	133708010	133708076	133708369	133708474	372	56,61,76	0,0,0	62,72,79	1,1,0	209	149	1	1	1.0,1.0,1.0	0.978,0.981,1.0	0.014		237	ENSMUSG00000023977.16	Ubr2	chr17	-	47291245	47292368	47291245	47291344	47292279	47292368	237	45,33,11	11,6,11	59,40,33	20,16,4	1084	149	0.627901	1	0.36,0.431,0.121	0.289,0.256,0.531	-0.055		918	ENSMUSG00000028797.21
373	ENSMUSG00000049804.10	Armcx4	chrX	+	133587896	133587974	133587267	133587386	133588765	133588855	373	5,4,9	0,0,0	9,10,6	0,1,1	227	149	1	1	1.0,1.0,1.0	1.0,0.868,0.798	0.111		238	ENSMUSG00000002763.17	Pex6	chr17	+	47034599	47034953	47034599	47034661	47034844	47034953	238	0,4,1	7,4,10	4,1,3	11,9,15	332	149	0.809934	1	0.0,0.31,0.043	0.14,0.047,0.082	0.028		78	ENSMUSG00000031169.14
375	ENSMUSG00000067369.13	Trmt2b	chrX	-	133164475	133164610	133163533	133163633	133167009	133167064	375	0,1,8	0,0,0	11,2,1	1,0,1	284	149	1	1	NA,1.0,1.0	0.852,1.0,0.344	0.268		240	ENSMUSG00000023971.10	Rrp36	chr17	-	46983450	46983773	46983450	46983517	46983631	46983773	240	3,3,1	7,4,6	2,2,6	2,14,16	263	149	0.893997	1	0.195,0.298,0.086	0.362,0.075,0.175	-0.011		152	ENSMUSG00000025420.14
376	ENSMUSG00000067369.13	Trmt2b	chrX	-	133167009	133167064	133164475	133164610	133168079	133168310	376	0,1,8	0,0,2	12,2,0	0,0,0	204	149	1	1	NA,1.0,0.745	1.0,1.0,NA	-0.127		245	ENSMUSG00000023952.14	Gtpbp2	chr17	+	46476703	46477372	46476703	46476923	46477236	46477372	245	4,3,4	3,3,3	1,6,4	5,2,0	462	149	0.728613	1	0.301,0.244,0.301	0.061,0.492,1.0	-0.236		2853	ENSMUSG00000020184.16
377	ENSMUSG00000067369.13	Trmt2b	chrX	-	133171258	133171334	133168079	133168310	133177594	133177669	377	0,0,1	0,2,0	0,0,2	0,0,1	225	149	1	1	NA,0.0,1.0	NA,NA,0.57	-0.07		249	ENSMUSG00000023944.15	Hsp90ab1	chr17	-	45882338	45882837	45882338	45882545	45882690	45882837	249	18,33,38	214417432931	25,14,30	247626883105	294	149	1	1	0.004,0.01,0.007	0.005,0.003,0.005	0.003		3248	ENSMUSG00000021901.11
380	ENSMUSG00000031256.12	Cstf2	chrX	+	132961392	132961471	132959935	132960171	132961693	132961863	380	46,23,46	3,0,0	43,66,63	0,0,3	228	149	0.765232	1	0.909,1.0,1.0	1.0,1.0,0.932	-0.008		251	ENSMUSG00000056492.7	Adgrf5	chr17	+	43750566	43751051	43750566	43750686	43750841	43751051	251	1,0,0	6,1,4	0,0,0	2,6,7	304	149	1	1	0.076,0.0,0.0	0.0,0.0,0.0	0.025		2010	ENSMUSG00000022704.17
381	ENSMUSG00000031256.12	Cstf2	chrX	+	132973163	132973223	132970593	132970656	132973884	132974026	381	0,0,1	10,11,10	3,0,0	13,23,29	209	149	0.846372	1	0.0,0.0,0.067	0.141,0.0,0.0	-0.025		252	ENSMUSG00000071653.10	1810009A15Rik	chr19	+	8866487	8867091	8866487	8866612	8867000	8867091	252	20,19,7	1,1,4	15,13,7	4,0,2	537	149	0.879136	1	0.847,0.841,0.327	0.51,1.0,0.493	0.004		1108	ENSMUSG00000037805.16
386	ENSMUSG00000034480.19	Diaph2	chrX	+	128702143	128702176	128650490	128650865	128704761	128704938	386	4,7,2	0,1,0	5,4,3	4,0,0	182	149	0.176131	1	1.0,0.851,1.0	0.506,1.0,1.0	0.115		258	ENSMUSG00000067212.9	H2-T23	chr17	-	36341713	36342805	36341713	36341989	36342529	36342805	258	9,0,4	1,0,1	1,0,3	1,0,0	689	149	1	1	0.661,NA,0.464	0.178,NA,1.0	-0.026		3084	ENSMUSG00000062198.6
387	ENSMUSG00000034480.19	Diaph2	chrX	+	128726675	128726696	128721987	128722092	128803648	128803788	387	1,1,1	1,0,2	1,5,8	5,0,3	170	149	0.694916	1	0.467,1.0,0.305	0.149,1.0,0.7	-0.026		273	ENSMUSG00000040356.17	Skiv2l	chr17	-	35063979	35064290	35063979	35064076	35064143	35064290	273	7,3,3	6,7,4	6,3,10	8,6,5	216	149	0.610005	1	0.446,0.228,0.341	0.341,0.256,0.58	-0.054		487	ENSMUSG00000033004.17
392	ENSMUSG00000025592.18	Dach2	chrX	+	112360281	112360363	112207624	112207774	112362154	112362193	392	0,0,0	0,1,0	0,0,2	0,0,0	231	149	1	1	NA,0.0,NA	NA,NA,1.0	-1		280	ENSMUSG00000040482.17	Dxo	chr17	+	35057788	35058113	35057788	35057883	35057962	35058113	280	11,6,6	16,13,15	1,7,8	11,10,15	228	149	0.579626	1	0.31,0.232,0.207	0.056,0.314,0.258	0.04		2991	ENSMUSG00000027951.17
393	ENSMUSG00000025592.18	Dach2	chrX	+	112362154	112362193	112207948	112208632	112465944	112465996	393	10,3,13	1,0,3	6,4,7	0,0,1	188	149	0.18028	1	0.888,1.0,0.774	1.0,1.0,0.847	-0.062		285	ENSMUSG00000015452.15	Ager	chr17	+	34818969	34819834	34818969	34819111	34819324	34819834	285	0,3,3	0,0,1	3,1,0	0,0,0	362	149	1	1	NA,1.0,0.553	1.0,1.0,NA	-0.224		1948	ENSMUSG00000026005.16
394	ENSMUSG00000025592.18	Dach2	chrX	+	112675482	112675572	112662516	112662600	112724539	112724718	394	0,0,0	2,0,0	1,0,0	0,0,0	239	149	1	1	0.0,NA,NA	1.0,NA,NA	-1		288	ENSMUSG00000057246.17	BC051142	chr17	+	34640826	34640961	34640826	34640856	34640931	34640961	288	0,0,2	0,0,0	0,0,1	2,0,0	224	149	1	1	NA,NA,1.0	0.0,NA,1.0	0.5		1798	ENSMUSG00000026634.17
395	ENSMUSG00000031379.14	Pir	chrX	+	163090199	163090317	163083219	163083426	163113010	163113095	395	0,2,1	13,6,4	2,1,0	8,5,6	267	149	0.516172	1	0.0,0.157,0.122	0.122,0.1,0.0	0.019		293	ENSMUSG00000024335.21	Brd2	chr17	-	34332905	34333452	34332905	34333151	34333323	34333452	293	6,9,4	54,53,54	9,4,6	56,55,62	321	149	0.853179	1	0.049,0.073,0.033	0.069,0.033,0.043	0.003		1944	ENSMUSG00000026005.16
396	ENSMUSG00000031379.14	Pir	chrX	+	163125469	163125514	163113010	163113095	163141143	163141226	396	11,9,6	0,1,0	13,10,7	1,0,2	194	149	1	1	1.0,0.874,1.0	0.909,1.0,0.729	0.079		297	ENSMUSG00000073422.12	H2-Ke6	chr17	-	34245006	34245444	34245006	34245199	34245369	34245444	297	26,25,22	16,11,11	39,33,32	17,11,25	319	149	0.907952	1	0.431,0.515,0.483	0.517,0.584,0.374	-0.015		2030	ENSMUSG00000021572.10
397	ENSMUSG00000025529.15	Zfp711	chrX	+	111536866	111537001	111534435	111534573	111537800	111537845	397	1,0,2	0,2,0	0,0,2	0,2,4	284	149	1	1	1.0,0.0,1.0	NA,0.0,0.208	0.563		301	ENSMUSG00000024325.9	Ring1	chr17	-	34240656	34242168	34240656	34240930	34241952	34242168	301	22,24,33	0,1,0	37,59,57	0,0,0	1171	149	1	1	1.0,0.753,1.0	1.0,1.0,1.0	-0.082		3046	ENSMUSG00000026608.14
400	ENSMUSG00000031245.9	Hmgn5	chrX	-	108054462	108054492	108054159	108054213	108055027	108055051	400	20,11,17	0,0,0	13,10,19	0,0,1	179	149	1	1	1.0,1.0,1.0	1.0,1.0,0.941	0.02		302	ENSMUSG00000061232.17	H2-K1	chr17	-	34215800	34216131	34215800	34215833	34216011	34216131	302	0,0,0	11,0,2	3,2,0	2,4,10	327	149	1	1	0.0,NA,0.0	0.406,0.186,0.0	-0.197		1850	ENSMUSG00000037902.19
401	ENSMUSG00000031245.9	Hmgn5	chrX	-	108055027	108055051	108054462	108054492	108056857	108057010	401	20,12,16	0,0,1	11,13,15	0,0,0	173	149	1	1	1.0,1.0,0.932	1.0,1.0,1.0	-0.023		304	ENSMUSG00000024319.19	Vps52	chr17	+	34178968	34179293	34178968	34179069	34179160	34179293	304	0,0,0	1,0,4	0,4,0	4,0,6	240	149	1	1	0.0,NA,0.0	0.0,1.0,0.0	-0.333		708	ENSMUSG00000042744.17
405	ENSMUSG00000047242.15	Taf9b	chrX	-	105253312	105253423	105250488	105252263	105259732	105259802	405	8,7,13	0,0,0	3,4,3	0,0,2	260	149	0.729243	1	1.0,1.0,1.0	1.0,1.0,0.462	0.179		313	ENSMUSG00000052142.16	Rasal3	chr17	-	32622029	32622555	32622029	32622373	32622494	32622555	313	0,0,0	0,1,0	0,1,0	0,0,0	270	149	1	1	NA,0.0,NA	NA,1.0,NA	-1		2069	ENSMUSG00000005417.18
406	ENSMUSG00000087174.8	5530601H04Rik	chrX	-	104086209	104086423	104082422	104083418	104086735	104086910	406	5,2,4	0,1,2	1,2,4	0,0,0	363	149	0.444936	1	1.0,0.451,0.451	1.0,1.0,1.0	-0.366		316	ENSMUSG00000024045.7	Akap8	chr17	-	32535160	32536320	32535160	32535641	32536040	32536320	316	22,22,33	7,17,49	26,21,24	21,23,23	548	149	0.634688	1	0.461,0.26,0.155	0.252,0.199,0.221	0.068		1200	ENSMUSG00000038346.19
409	ENSMUSG00000087174.8	5530601H04Rik	chrX	-	104087607	104087717	104082413	104083418	104091514	104091616	409	1,0,5	0,0,0	5,3,5	0,0,1	259	149	1	1	1.0,NA,1.0	1.0,1.0,0.742	0.086		325	ENSMUSG00000117427.2	Gm36199	chr17	+	29684249	29684514	29684249	29684277	29684401	29684514	325	1,2,0	0,0,1	0,0,1	0,0,0	273	149	1	1	1.0,1.0,0.0	NA,NA,1.0	-0.333		503	ENSMUSG00000037020.17
410	ENSMUSG00000087174.8	5530601H04Rik	chrX	-	104087607	104087717	104082413	104083418	104110364	104110483	410	1,1,8	0,0,1	2,8,10	0,0,1	259	149	1	1	1.0,1.0,0.822	1.0,1.0,0.852	-0.01		329	ENSMUSG00000024013.16	Fgd2	chr17	+	29583884	29584584	29583884	29583965	29584435	29584584	329	2,0,0	0,0,2	0,2,0	2,0,0	619	149	1	1	1.0,NA,0.0	0.0,1.0,NA	0		1665	ENSMUSG00000003549.10
411	ENSMUSG00000087174.8	5530601H04Rik	chrX	-	104091514	104091616	104080802	104083418	104110364	104110483	411	3,0,0	0,0,1	5,3,4	0,0,1	251	149	1	1	1.0,NA,0.0	1.0,1.0,0.704	-0.401		341	ENSMUSG00000024186.16	Rgs11	chr17	+	26422269	26422486	26422269	26422366	26422435	26422486	341	0,1,0	0,0,0	0,0,0	2,0,0	218	149	1	1	NA,1.0,NA	0.0,NA,NA	1		1982	ENSMUSG00000012848.16
412	ENSMUSG00000087174.8	5530601H04Rik	chrX	-	104091514	104091616	104085006	104087717	104110364	104110483	412	4,1,5	2,1,8	11,6,7	2,9,10	251	149	0.567356	1	0.543,0.372,0.271	0.766,0.284,0.294	-0.053		343	ENSMUSG00000024181.10	Mrpl28	chr17	+	26344230	26344538	26344230	26344365	26344473	26344538	343	3,4,8	0,0,0	0,5,3	0,0,2	257	149	1	1	1.0,1.0,1.0	NA,1.0,0.465	0.267		2009	ENSMUSG00000022704.17
415	ENSMUSG00000033906.6	Zdhhc15	chrX	-	103631906	103632027	103617774	103617844	103641697	103641792	415	10,15,19	0,1,1	15,20,9	0,0,5	270	149	1	1	1.0,0.892,0.913	1.0,1.0,0.498	0.102		344	ENSMUSG00000024180.15	Pgap6	chr17	+	26337083	26337926	26337083	26337403	26337835	26337926	344	0,0,0	2,0,4	0,2,0	0,3,0	581	149	1	1	0.0,NA,0.0	NA,0.146,NA	-0.146		280	ENSMUSG00000041130.11
416	ENSMUSG00000033906.6	Zdhhc15	chrX	-	103676189	103676216	103641697	103641792	103714269	103714670	416	11,24,30	0,2,2	32,21,29	3,4,0	176	149	0.460606	1	1.0,0.91,0.927	0.9,0.816,1.0	0.04		346	ENSMUSG00000024180.15	Pgap6	chr17	+	26339257	26339659	26339257	26339436	26339512	26339659	346	2,0,0	1,0,1	0,2,0	0,0,0	225	149	1	1	0.57,NA,0.0	NA,1.0,NA	-0.715		572	ENSMUSG00000010936.12
417	ENSMUSG00000031333.8	Abcb7	chrX	-	103366939	103367059	103348875	103349008	103386099	103386186	417	42,37,48	0,0,1	22,32,37	0,0,0	269	149	1	1	1.0,1.0,0.964	1.0,1.0,1.0	-0.012		349	ENSMUSG00000037326.11	Capn15	chr17	-	26178780	26179537	26178780	26178959	26179038	26179537	349	4,6,4	6,9,15	4,6,4	7,10,16	228	149	0.849759	1	0.303,0.303,0.148	0.272,0.282,0.14	0.02		913	ENSMUSG00000048537.17
419	ENSMUSG00000086370.10	Ftx	chrX	-	102635408	102635512	102625507	102625621	102639536	102639613	419	0,0,0	2,4,1	0,0,2	0,1,3	253	149	1	1	0.0,0.0,0.0	NA,0.0,0.282	-0.141		350	ENSMUSG00000037326.11	Capn15	chr17	-	26178780	26179537	26178780	26178959	26179310	26179537	350	27,26,26	4,1,0	15,27,41	1,0,3	500	149	0.701394	1	0.668,0.886,1.0	0.817,1.0,0.803	-0.022		1552	ENSMUSG00000027014.15
420	ENSMUSG00000086370.10	Ftx	chrX	-	102646647	102646695	102639536	102639613	102649063	102649225	420	0,6,2	1,0,0	0,3,3	0,0,0	197	149	1	1	0.0,1.0,1.0	NA,1.0,1.0	-0.333		351	ENSMUSG00000037326.11	Capn15	chr17	-	26179038	26179537	26179038	26179205	26179310	26179537	351	23,21,22	3,0,0	12,21,33	0,1,0	254	149	0.795131	1	0.818,1.0,1.0	1.0,0.925,1.0	-0.036		1647	ENSMUSG00000117694.2
421	ENSMUSG00000086370.10	Ftx	chrX	-	102648820	102648915	102646647	102646695	102649063	102649225	421	0,0,2	0,0,2	1,1,0	0,2,0	244	149	1	1	NA,NA,0.379	1.0,0.234,NA	-0.238		352	ENSMUSG00000037326.11	Capn15	chr17	-	26181644	26182119	26181644	26181868	26181935	26182119	352	10,3,7	46,29,16	3,5,4	22,20,18	216	149	0.859757	1	0.13,0.067,0.232	0.086,0.147,0.133	0.021		1703	ENSMUSG00000021767.20
423	ENSMUSG00000086370.10	Ftx	chrX	-	102656628	102656801	102652909	102653022	102658670	102658798	423	15,12,8	0,0,0	21,10,7	0,0,2	322	149	1	1	1.0,1.0,1.0	1.0,1.0,0.618	0.127		355	ENSMUSG00000039615.10	Stub1	chr17	-	26050282	26050605	26050282	26050339	26050517	26050605	355	99,92,117	90,72,126	146143130	101136140	327	149	0.798081	1	0.334,0.368,0.297	0.397,0.324,0.297	-0.006		1004	ENSMUSG00000042790.17
424	ENSMUSG00000086370.10	Ftx	chrX	-	102656649	102656801	102652909	102653022	102658670	102658798	424	16,11,7	0,0,0	16,11,4	0,0,2	301	149	0.776621	1	1.0,1.0,1.0	1.0,1.0,0.497	0.168		370	ENSMUSG00000040688.17	Tbl3	chr17	-	24923784	24924291	24923784	24923860	24924120	24924291	370	2,3,1	11,19,30	0,2,5	15,27,33	409	149	0.801967	1	0.062,0.054,0.012	0.0,0.026,0.052	0.017		973	ENSMUSG00000028601.19
425	ENSMUSG00000086370.10	Ftx	chrX	-	102658670	102658798	102652909	102653022	102667152	102667269	425	0,5,2	0,0,0	4,2,2	0,0,1	277	149	1	1	NA,1.0,1.0	1.0,1.0,0.518	0.161		371	ENSMUSG00000040688.17	Tbl3	chr17	-	24924120	24924455	24924120	24924291	24924370	24924455	371	0,3,0	9,16,19	0,0,0	4,9,25	228	149	0.855344	1	0.0,0.109,0.0	0.0,0.0,0.0	0.036		1053	ENSMUSG00000047193.17
436	ENSMUSG00000034160.14	Ogt	chrX	+	100716928	100717045	100716648	100716819	100717147	100717318	436	105,85,92	0,0,0	235139116	0,0,2	266	149	1	1	1.0,1.0,1.0	1.0,1.0,0.97	0.01		373	ENSMUSG00000079657.11	Rab26	chr17	-	24749028	24749417	24749028	24749094	24749364	24749417	373	1,1,3	0,0,1	5,2,12	0,0,0	419	149	1	1	1.0,1.0,0.516	1.0,1.0,1.0	-0.161		1492	ENSMUSG00000028059.17
437	ENSMUSG00000031311.18	Nono	chrX	+	100474098	100474158	100473160	100473368	100480814	100480983	437	863659994	1,1,0	8469941052	0,1,5	209	149	1	1	0.998,0.998,1.0	1.0,0.999,0.993	0.001		374	ENSMUSG00000033597.10	Caskin1	chr17	+	24719864	24720118	24719864	24719953	24720033	24720118	374	1,0,0	0,0,4	6,1,0	0,1,2	229	149	1	1	1.0,NA,0.0	1.0,0.394,0.0	0.035		1686	ENSMUSG00000024795.12
438	ENSMUSG00000031311.18	Nono	chrX	+	100474101	100474158	100473340	100473368	100480814	100480983	438	260180286	1,1,0	233264324	0,1,5	206	149	1	1	0.995,0.992,1.0	1.0,0.995,0.979	0.004		376	ENSMUSG00000024137.10	E4f1	chr17	-	24665755	24666184	24665755	24665815	24666063	24666184	376	2,3,5	0,0,0	5,8,3	2,0,0	397	149	0.753702	1	1.0,1.0,1.0	0.484,1.0,1.0	0.172		128	ENSMUSG00000024948.16
439	ENSMUSG00000031311.18	Nono	chrX	+	100480814	100480983	100474098	100474158	100483092	100483227	439	149611641770	0,0,2	144718081856	0,0,0	318	149	1	1	1.0,1.0,0.998	1.0,1.0,1.0	-0.001		385	ENSMUSG00000023903.9	Mmp25	chr17	-	23850764	23851607	23850764	23850847	23851522	23851607	385	0,3,0	0,0,0	0,0,0	1,0,0	824	149	1	1	NA,1.0,NA	0.0,NA,NA	1		1278	ENSMUSG00000026213.16
442	ENSMUSG00000079487.12	Med12	chrX	+	100320270	100320525	100320047	100320158	100321039	100321186	442	106,84,98	0,0,2	122,87,98	0,0,0	404	149	1	1	1.0,1.0,0.948	1.0,1.0,1.0	-0.017		404	ENSMUSG00000080316.12	Spaca6	chr17	+	18058348	18058771	18058348	18058505	18058577	18058771	404	28,13,15	0,0,0	24,24,7	0,2,0	221	149	1	1	1.0,1.0,1.0	1.0,0.89,1.0	0.037		96	ENSMUSG00000047731.18
443	ENSMUSG00000079487.12	Med12	chrX	+	100325655	100325706	100325343	100325488	100326006	100326125	443	13,15,15	0,0,1	15,11,21	0,2,0	200	149	1	1	1.0,1.0,0.918	1.0,0.804,1.0	0.038		407	ENSMUSG00000023885.10	Thbs2	chr17	-	14888986	14890331	14888986	14889126	14890233	14890331	407	0,0,0	0,1,0	0,1,0	0,6,0	1256	149	1	1	NA,0.0,NA	NA,0.019,NA	-0.019		1495	ENSMUSG00000033790.12
444	ENSMUSG00000079487.12	Med12	chrX	+	100326006	100326125	100325343	100325488	100326305	100326449	444	5,10,8	0,0,0	5,12,1	1,0,0	268	149	1	1	1.0,1.0,1.0	0.735,1.0,1.0	0.088		408	ENSMUSG00000058159.15	T2	chr17	+	8640936	8641560	8640936	8641091	8641358	8641560	408	0,0,0	0,0,1	0,2,0	0,0,0	416	149	1	1	NA,NA,0.0	NA,1.0,NA	-1		2543	ENSMUSG00000025812.19
445	ENSMUSG00000046032.17	Snx12	chrX	-	100259088	100259184	100258006	100258131	100265867	100266155	445	66,54,91	0,0,1	72,105,81	0,0,0	245	149	1	1	1.0,1.0,0.982	1.0,1.0,1.0	-0.006		416	ENSMUSG00000032624.17	Eml4	chr17	+	83780474	83781177	83780474	83780562	83781078	83781177	416	15,16,3	58,75,121	14,16,16	98114154	665	149	0.871922	1	0.055,0.046,0.006	0.031,0.03,0.023	0.008		2663	ENSMUSG00000023994.14
446	ENSMUSG00000031220.15	Awat2	chrX	-	99446745	99446945	99445826	99446546	99447736	99447911	446	0,1,2	1,1,1	7,2,0	0,1,0	349	149	1	1	0.0,0.299,0.461	1.0,0.461,NA	-0.477		427	ENSMUSG00000022800.15	Fyttd1	chr16	+	32718743	32719309	32718743	32718840	32719247	32719309	427	5,14,16	31,33,70	20,14,10	50,41,64	556	149	0.710584	1	0.041,0.102,0.058	0.097,0.084,0.04	-0.007		909	ENSMUSG00000025747.13
452	ENSMUSG00000035045.18	Zc3h12b	chrX	+	94822500	94822575	94785510	94785577	94941870	94941960	452	1,0,5	5,1,0	4,0,3	4,2,0	224	149	0.568743	1	0.117,0.0,1.0	0.399,0.0,1.0	-0.094		430	ENSMUSG00000022537.19	Tmem44	chr16	-	30359556	30362306	30359556	30359727	30362219	30362306	430	59,40,54	0,4,1	23,62,34	0,1,3	2641	149	0.892679	1	1.0,0.361,0.753	1.0,0.778,0.39	-0.018		2216	ENSMUSG00000036923.13
455	ENSMUSG00000025656.18	Arhgef9	chrX	-	94096238	94096396	94095524	94095760	94098548	94098553	455	0,1,0	3,2,1	0,0,1	2,0,4	307	149	1	1	0.0,0.195,0.0	0.0,NA,0.108	0.011		431	ENSMUSG00000038084.17	Opa1	chr16	+	29432943	29433982	29432943	29433016	29433866	29433982	431	15,11,8	6,3,4	13,20,17	5,5,9	999	149	0.9615	1	0.272,0.354,0.23	0.279,0.374,0.22	-0.006		723	ENSMUSG00000029346.13
457	ENSMUSG00000025656.18	Arhgef9	chrX	-	94097834	94097896	94095129	94095760	94098548	94098617	457	4,1,3	3,2,1	21,12,2	2,0,4	211	149	0.0998485	1	0.485,0.261,0.679	0.881,1.0,0.261	-0.239		432	ENSMUSG00000024725.14	Ostf1	chr19	-	18562005	18563989	18562005	18562107	18563910	18563989	432	4,3,3	10,14,13	5,6,2	9,17,16	1952	149	0.679642	1	0.03,0.016,0.017	0.041,0.026,0.009	-0.004		2095	ENSMUSG00000054889.11
466	ENSMUSG00000025151.17	Maged1	chrX	-	93584856	93584930	93583460	93584153	93585497	93585596	466	212160297	8,1,0	225214254	1,2,1	223	149	0.61909	1	0.947,0.991,1.0	0.993,0.986,0.994	-0.012		433	ENSMUSG00000022884.17	Eif4a2	chr16	+	22927337	22927601	22927337	22927383	22927468	22927601	433	35,35,41	21,30,46	40,46,37	45,27,43	234	149	0.772206	1	0.515,0.426,0.362	0.361,0.52,0.354	0.023		1444	ENSMUSG00000029098.18
467	ENSMUSG00000079508.9	Apoo	chrX	+	93423531	93423639	93410722	93410768	93425716	93425836	467	9,13,17	0,1,0	12,8,21	0,0,0	257	149	1	1	1.0,0.883,1.0	1.0,1.0,1.0	-0.039		439	ENSMUSG00000005958.16	Ephb3	chr16	+	21033074	21033747	21033074	21033422	21033543	21033747	439	14,17,37	0,0,2	27,34,8	0,0,0	270	149	1	1	1.0,1.0,0.911	1.0,1.0,1.0	-0.03		1567	ENSMUSG00000010608.16
468	ENSMUSG00000079508.9	Apoo	chrX	+	93434350	93434446	93431270	93431325	93437794	93437886	468	57,51,60	0,3,0	39,52,51	1,0,0	245	149	1	1	1.0,0.912,1.0	0.96,1.0,1.0	-0.016		443	ENSMUSG00000041215.17	Yeats2	chr16	+	19989940	19993289	19989940	19990052	19993244	19993289	443	140127116	62,53,69	181155116	66,97,47	3341	149	0.779552	1	0.091,0.097,0.07	0.109,0.067,0.099	-0.006		2271	ENSMUSG00000033543.18
469	ENSMUSG00000079508.9	Apoo	chrX	+	93434350	93434446	93431270	93431325	93441727	93441808	469	17,15,18	0,0,0	5,23,14	0,1,0	245	149	1	1	1.0,1.0,1.0	1.0,0.933,1.0	0.022		450	ENSMUSG00000005899.15	Smpd4	chr16	+	17443583	17444402	17443583	17443726	17444293	17444402	450	20,21,16	0,0,0	12,15,17	1,1,0	716	149	1	1	1.0,1.0,1.0	0.714,0.757,1.0	0.176		2515	ENSMUSG00000079478.10
470	ENSMUSG00000079508.9	Apoo	chrX	+	93437794	93437886	93431270	93431325	93441727	93441808	470	30,20,30	0,0,0	21,35,25	0,1,0	241	149	1	1	1.0,1.0,1.0	1.0,0.956,1.0	0.015		452	ENSMUSG00000005899.15	Smpd4	chr16	+	17457608	17458153	17457608	17457706	17457989	17458153	452	11,10,3	0,0,0	3,8,4	0,0,2	432	149	0.653261	1	1.0,1.0,1.0	1.0,1.0,0.408	0.197		1372	ENSMUSG00000006215.13
471	ENSMUSG00000079508.9	Apoo	chrX	+	93437794	93437886	93434350	93434446	93441727	93441808	471	71,55,76	0,1,0	54,64,62	0,0,0	241	149	1	1	1.0,0.971,1.0	1.0,1.0,1.0	-0.01		456	ENSMUSG00000055692.22	Tmem191c	chr16	+	17094497	17094751	17094497	17094621	17094700	17094751	456	0,0,0	0,0,1	2,0,0	0,0,1	228	149	1	1	NA,NA,0.0	1.0,NA,0.0	-0.5		880	ENSMUSG00000025969.16
472	ENSMUSG00000079508.9	Apoo	chrX	+	93456065	93456131	93441727	93441808	93460447	93460567	472	47,21,37	0,0,1	38,47,33	0,0,1	215	149	1	1	1.0,1.0,0.962	1.0,1.0,0.958	0.001		457	ENSMUSG00000055692.22	Tmem191c	chr16	+	17094497	17094903	17094497	17094751	17094825	17094903	457	0,0,0	0,0,3	0,0,1	0,0,0	223	149	1	1	NA,NA,0.0	NA,NA,1.0	-1		717	ENSMUSG00000001632.17
475	ENSMUSG00000043929.17	Klhl15	chrX	+	93281654	93281763	93278826	93279026	93285550	93285601	475	1,0,0	0,2,0	1,0,0	2,4,3	258	149	1	1	1.0,0.0,NA	0.224,0.0,0.0	0.425		460	ENSMUSG00000055692.22	Tmem191c	chr16	+	17095205	17095755	17095205	17095456	17095532	17095755	460	0,0,0	2,0,2	1,1,0	3,1,0	225	149	1	1	0.0,NA,0.0	0.181,0.398,NA	-0.289		2536	ENSMUSG00000031812.17
476	ENSMUSG00000043929.17	Klhl15	chrX	+	93285550	93285601	93278826	93279026	93296020	93296346	476	2,6,0	0,0,0	2,4,3	2,0,0	200	149	1	1	1.0,1.0,NA	0.427,1.0,1.0	0.191		461	ENSMUSG00000055692.22	Tmem191c	chr16	+	17095532	17095755	17095532	17095605	17095714	17095755	461	0,0,0	0,0,2	1,1,1	0,0,0	258	149	1	1	NA,NA,0.0	1.0,1.0,1.0	-1		1636	ENSMUSG00000021819.12
477	ENSMUSG00000079509.11	Zfx	chrX	-	93124325	93124466	93118236	93123585	93124942	93125092	477	65,47,71	0,0,0	40,49,71	0,0,1	290	149	1	1	1.0,1.0,1.0	1.0,1.0,0.973	0.009		462	ENSMUSG00000022768.18	Ccdc116	chr16	-	16956927	16960066	16956927	16957933	16959463	16960066	462	4,2,2	0,0,0	9,1,3	1,0,0	1679	149	1	1	1.0,1.0,1.0	0.444,1.0,1.0	0.185		2414	ENSMUSG00000037363.10
480	ENSMUSG00000079509.11	Zfx	chrX	-	93157801	93157869	93145896	93145986	93166673	93166715	480	5,3,9	2,1,0	3,6,16	0,2,2	217	149	0.518202	1	0.632,0.673,1.0	1.0,0.673,0.846	-0.071		463	ENSMUSG00000022779.17	Top3b	chr16	+	16707346	16708125	16707346	16707475	16707975	16708125	463	8,10,8	22,32,22	18,2,12	19,34,31	649	149	0.866339	1	0.077,0.067,0.077	0.179,0.013,0.082	-0.018		210	ENSMUSG00000042625.17
481	ENSMUSG00000079509.11	Zfx	chrX	-	93157801	93157869	93145896	93145986	93167210	93167308	481	4,1,6	2,0,0	3,2,3	0,0,0	217	149	1	1	0.579,1.0,1.0	1.0,1.0,1.0	-0.14		464	ENSMUSG00000022681.16	Ntan1	chr16	+	13644746	13644989	13644746	13644849	13644923	13644989	464	6,1,5	8,7,19	0,4,3	6,4,9	223	149	0.773326	1	0.334,0.087,0.15	0.0,0.401,0.182	-0.004		2838	ENSMUSG00000011257.20
482	ENSMUSG00000025059.17	Gk	chrX	-	84749843	84749930	84745542	84748002	84754656	84754737	482	2,4,8	0,0,0	1,3,4	0,0,1	236	149	1	1	1.0,1.0,1.0	1.0,1.0,0.716	0.095		466	ENSMUSG00000022710.18	Usp7	chr16	-	8515756	8516450	8515756	8515858	8516315	8516450	466	25,28,16	104,81,129	31,15,19	113,95,116	606	149	0.632792	1	0.056,0.078,0.03	0.063,0.037,0.039	0.008		899	ENSMUSG00000043411.16
483	ENSMUSG00000025059.17	Gk	chrX	-	84782827	84782845	84780919	84780955	84783900	84783967	483	0,0,0	1,2,0	2,2,1	0,4,4	167	149	1	1	0.0,0.0,NA	1.0,0.308,0.182	-0.497		472	ENSMUSG00000039637.16	Coro7	chr16	-	4452452	4452771	4452452	4452545	4452625	4452771	472	0,5,2	5,5,3	5,1,1	7,7,9	229	149	0.593976	1	0.0,0.394,0.303	0.317,0.085,0.067	0.076		1457	ENSMUSG00000038174.15
485	ENSMUSG00000073077.8	Cfap47	chrX	-	78347850	78348010	78346358	78346453	78357260	78357359	485	0,0,0	1,0,0	0,0,1	0,0,2	309	149	1	1	0.0,NA,NA	NA,NA,0.194	-0.194		473	ENSMUSG00000014303.14	Glis2	chr16	+	4429396	4429733	4429396	4429530	4429614	4429733	473	3,7,6	50,44,58	3,10,6	46,78,39	233	149	0.742605	1	0.037,0.092,0.062	0.04,0.076,0.09	-0.005		2387	ENSMUSG00000027425.19
486	ENSMUSG00000073077.8	Cfap47	chrX	-	78473426	78473655	78472141	78472363	78474722	78474869	486	1,1,0	1,0,2	0,7,0	0,0,0	378	149	1	1	0.283,1.0,0.0	NA,1.0,NA	-0.572		479	ENSMUSG00000060992.10	Copz1	chr15	+	103199101	103199847	103199101	103199183	103199755	103199847	479	2,3,8	32,48,41	4,5,9	32,67,53	721	149	0.68784	1	0.013,0.013,0.039	0.025,0.015,0.034	-0.003		584	ENSMUSG00000055491.15
487	ENSMUSG00000073077.8	Cfap47	chrX	-	78489163	78489359	78483465	78483675	78490036	78490196	487	1,1,0	0,3,0	1,7,4	0,0,0	345	149	1	1	1.0,0.126,NA	1.0,1.0,1.0	-0.437		483	ENSMUSG00000036966.16	Spryd3	chr15	-	102038712	102039225	102038712	102038848	102039100	102039225	483	2,0,0	4,6,7	1,0,0	12,8,6	401	149	1	1	0.157,0.0,0.0	0.03,0.0,0.0	0.042		2680	ENSMUSG00000005682.10
488	ENSMUSG00000073077.8	Cfap47	chrX	-	78532640	78532857	78532111	78532353	78534536	78534633	488	0,0,0	2,0,0	1,0,2	3,1,0	366	149	1	1	0.0,NA,NA	0.119,0.0,1.0	-0.373		484	ENSMUSG00000037003.17	Tns2	chr15	+	102023995	102024201	102023995	102024064	102024171	102024201	484	1,1,0	5,4,10	0,2,0	4,3,4	256	149	1	1	0.104,0.127,0.0	0.0,0.28,0.0	-0.016		840	ENSMUSG00000038828.14
489	ENSMUSG00000073077.8	Cfap47	chrX	-	78534724	78534917	78534536	78534633	78537283	78537436	489	0,0,0	2,0,0	3,0,0	1,3,0	342	149	1	1	0.0,NA,NA	0.567,0.0,NA	-0.283		486	ENSMUSG00000023039.18	Krt7	chr15	+	101311849	101314162	101311849	101312061	101314101	101314162	486	6,0,0	2,0,3	14,4,4	2,8,11	2189	149	1	1	0.17,NA,0.0	0.323,0.033,0.024	-0.042		631	ENSMUSG00000000902.14
491	ENSMUSG00000035725.14	Prkx	chrX	-	76814852	76814948	76808954	76809012	76816721	76816841	491	5,9,15	1,0,0	5,4,14	0,0,1	245	149	1	1	0.753,1.0,1.0	1.0,1.0,0.895	-0.047		488	ENSMUSG00000037353.10	Letmd1	chr15	+	100373382	100374767	100373382	100373535	100374670	100374767	488	7,5,4	10,13,25	12,10,6	33,26,17	1284	149	0.630756	1	0.075,0.043,0.018	0.04,0.043,0.039	0.005		2869	ENSMUSG00000023764.19
494	ENSMUSG00000031197.12	Vbp1	chrX	+	74566865	74566964	74564968	74565035	74574690	74574829	494	85,80,124	0,0,1	88,87,94	0,1,0	248	149	1	1	1.0,1.0,0.987	1.0,0.981,1.0	0.002		496	ENSMUSG00000022999.16	Lmbr1l	chr15	-	98806400	98806802	98806400	98806640	98806729	98806802	496	1,3,3	4,4,1	3,5,1	3,4,8	238	149	0.834015	1	0.135,0.32,0.653	0.385,0.439,0.073	0.07		684	ENSMUSG00000070643.12
495	ENSMUSG00000031198.5	Fundc2	chrX	+	74434389	74434465	74430707	74430858	74435245	74435377	495	19,15,23	0,0,1	34,32,50	0,0,0	225	149	1	1	1.0,1.0,0.938	1.0,1.0,1.0	-0.021		497	ENSMUSG00000067713.8	Prkag1	chr15	-	98713063	98713240	98713063	98713118	98713194	98713240	497	1,3,3	30,18,31	0,4,3	28,14,20	225	149	0.75915	1	0.022,0.099,0.06	0.0,0.159,0.09	-0.023		1407	ENSMUSG00000041763.15
497	ENSMUSG00000031262.13	Cenpi	chrX	+	133209314	133209382	133208832	133208977	133209475	133209596	497	1,2,4	8,1,2	4,0,3	2,1,0	217	149	0.118815	1	0.079,0.579,0.579	0.579,0.0,1.0	-0.114		498	ENSMUSG00000003355.8	Fkbp11	chr15	-	98624364	98625179	98624364	98624435	98625091	98625179	498	1,2,2	0,0,0	6,1,1	1,0,0	805	149	1	1	1.0,1.0,1.0	0.526,1.0,1.0	0.158		1755	ENSMUSG00000041540.17
498	ENSMUSG00000031262.13	Cenpi	chrX	+	133225509	133225558	133218773	133218881	133225839	133225886	498	30,25,39	0,0,0	36,37,44	0,1,0	198	149	1	1	1.0,1.0,1.0	1.0,0.965,1.0	0.012		503	ENSMUSG00000025006.19	Sorbs1	chr19	-	40365088	40365460	40365088	40365247	40365427	40365460	503	5,9,12	0,0,0	18,14,12	3,0,0	329	149	0.596708	1	1.0,1.0,1.0	0.731,1.0,1.0	0.09		2270	ENSMUSG00000033543.18
499	ENSMUSG00000031403.15	Dkc1	chrX	+	74140238	74140320	74139706	74139733	74140439	74140507	499	7,2,8	35,33,60	12,11,5	35,42,60	231	149	0.149408	1	0.114,0.038,0.079	0.181,0.145,0.051	-0.049		506	ENSMUSG00000022621.17	Rabl2	chr15	-	89468112	89468593	89468112	89468210	89468546	89468593	506	16,16,20	0,0,1	8,11,5	0,0,0	485	149	1	1	1.0,1.0,0.86	1.0,1.0,1.0	-0.047		2544	ENSMUSG00000025812.19
500	ENSMUSG00000031403.15	Dkc1	chrX	+	74143635	74143700	74142368	74142553	74144038	74144165	500	87,76,108	4,1,2	75112132	3,6,6	214	149	0.0998631	1	0.938,0.981,0.974	0.946,0.929,0.939	0.026		508	ENSMUSG00000022617.16	Chkb	chr15	-	89312336	89313030	89312336	89312432	89312613	89313030	508	1,0,0	0,1,0	1,0,0	1,0,0	330	149	1	1	1.0,0.0,NA	0.311,NA,NA	0.189		2011	ENSMUSG00000022704.17
502	ENSMUSG00000031403.15	Dkc1	chrX	+	74146027	74146171	74144553	74144726	74147945	74148066	502	125104142	1,0,0	146155136	0,0,0	293	149	1	1	0.985,1.0,1.0	1.0,1.0,1.0	-0.005		509	ENSMUSG00000022617.16	Chkb	chr15	-	89312613	89313030	89312613	89312747	89312916	89313030	509	18,6,6	0,0,1	14,5,7	0,1,2	318	149	0.629992	1	1.0,1.0,0.738	1.0,0.701,0.621	0.139		3087	ENSMUSG00000027086.17
512	ENSMUSG00000031398.14	Plxna3	chrX	+	73374574	73375198	73372671	73372821	73375572	73376112	512	27,32,38	2,0,0	50,47,44	0,2,0	773	149	1	1	0.722,1.0,1.0	1.0,0.819,1.0	-0.032		510	ENSMUSG00000022617.16	Chkb	chr15	-	89312613	89313030	89312613	89312781	89312916	89313030	510	18,5,6	0,0,0	13,5,7	0,2,0	284	149	1	1	1.0,1.0,1.0	1.0,0.567,1.0	0.144		3300	ENSMUSG00000034248.8
513	ENSMUSG00000031398.14	Plxna3	chrX	+	73379606	73379797	73379375	73379472	73379882	73380028	513	12,15,8	1,0,0	19,4,17	0,0,0	340	149	1	1	0.84,1.0,1.0	1.0,1.0,1.0	-0.053		516	ENSMUSG00000015377.11	Dennd6b	chr15	-	89069564	89069850	89069564	89069667	89069740	89069850	516	5,2,8	4,5,9	11,6,9	18,19,6	222	149	0.708608	1	0.456,0.212,0.374	0.291,0.175,0.502	0.025		2640	ENSMUSG00000023286.17
514	ENSMUSG00000031398.14	Plxna3	chrX	+	73381739	73381974	73381516	73381660	73382064	73382207	514	13,16,10	0,0,0	6,19,14	0,0,3	384	149	0.535035	1	1.0,1.0,1.0	1.0,1.0,0.644	0.119		521	ENSMUSG00000015377.11	Dennd6b	chr15	-	89070565	89071446	89070565	89070630	89071350	89071446	521	28,23,23	0,0,0	42,47,49	0,0,1	869	149	1	1	1.0,1.0,1.0	1.0,1.0,0.894	0.035		1016	ENSMUSG00000028312.20
515	ENSMUSG00000031398.14	Plxna3	chrX	+	73382847	73382994	73382675	73382742	73383071	73383231	515	12,14,22	2,0,0	61,16,34	0,0,2	296	149	1	1	0.751,1.0,1.0	1.0,1.0,0.895	-0.048		522	ENSMUSG00000015377.11	Dennd6b	chr15	-	89071158	89071446	89071158	89071201	89071350	89071446	522	6,8,11	0,0,2	9,8,9	1,1,0	298	149	1	1	1.0,1.0,0.733	0.818,0.8,1.0	0.038		2723	ENSMUSG00000030172.16
516	ENSMUSG00000031398.14	Plxna3	chrX	+	73384036	73384227	73383670	73383767	73384448	73384618	516	26,38,28	0,0,0	39,52,39	0,1,0	340	149	1	1	1.0,1.0,1.0	1.0,0.958,1.0	0.014		523	ENSMUSG00000015377.11	Dennd6b	chr15	-	89071158	89071446	89071158	89071253	89071350	89071446	523	2,6,7	3,4,2	6,6,4	1,6,2	246	149	0.781126	1	0.288,0.476,0.679	0.784,0.377,0.548	-0.089		2353	ENSMUSG00000030960.17
517	ENSMUSG00000001962.9	Fam50a	chrX	+	73362997	73363108	73362796	73362867	73363565	73363740	517	36,28,47	0,0,0	46,42,38	2,1,0	260	149	0.335708	1	1.0,1.0,1.0	0.929,0.96,1.0	0.037		529	ENSMUSG00000016763.16	Scube1	chr15	-	83492418	83493077	83492418	83492498	83492924	83493077	529	19,23,31	24,23,37	45,20,15	36,27,34	575	149	0.767734	1	0.17,0.206,0.178	0.245,0.161,0.103	0.015		1271	ENSMUSG00000020964.15
519	ENSMUSG00000015291.11	Gdi1	chrX	+	73350708	73350843	73350450	73350550	73351277	73351476	519	55,44,78	0,0,0	68,65,99	0,0,1	284	149	1	1	1.0,1.0,1.0	1.0,1.0,0.981	0.006		533	ENSMUSG00000058586.13	Serhl	chr15	+	82985844	82986186	82985844	82985994	82986072	82986186	533	0,0,1	0,1,2	1,0,0	7,2,1	227	149	1	1	NA,0.0,0.247	0.086,0.0,0.0	0.095		1841	ENSMUSG00000024446.14
520	ENSMUSG00000008682.14	Rpl10	chrX	+	73314966	73315324	73314584	73314630	73315405	73315513	520	308312479	0,0,0	364376532	0,0,2	507	149	1	1	1.0,1.0,1.0	1.0,1.0,0.987	0.004		534	ENSMUSG00000061740.9	Cyp2d22	chr15	-	82257311	82258034	82257311	82257488	82257873	82258034	534	0,0,0	0,1,0	4,0,2	2,0,0	534	149	1	1	NA,0.0,NA	0.358,NA,1.0	-0.679		2239	ENSMUSG00000030611.11
521	ENSMUSG00000008682.14	Rpl10	chrX	+	73315265	73315324	73314465	73314630	73315405	73315513	521	381433635	0,0,0	520593791	0,0,2	208	149	1	1	1.0,1.0,1.0	1.0,1.0,0.996	0.001		535	ENSMUSG00000061740.9	Cyp2d22	chr15	-	82258104	82258670	82258104	82258257	82258498	82258670	535	2,0,0	0,0,0	0,0,0	0,1,0	390	149	1	1	1.0,NA,NA	NA,0.0,NA	1		2288	ENSMUSG00000036893.18
522	ENSMUSG00000008682.14	Rpl10	chrX	+	73316277	73316440	73315784	73315923	73316520	73316531	522	165713722343	2,1,4	209322272655	0,1,4	312	149	1	1	0.997,0.998,0.996	1.0,0.999,0.997	-0.002		536	ENSMUSG00000022456.19	Septin3	chr15	+	82174938	82178775	82174938	82175032	82175453	82178775	536	142101156	1,0,0	140174146	1,2,0	570	149	1	1	0.974,1.0,1.0	0.973,0.958,1.0	0.014		2560	ENSMUSG00000059475.14
525	ENSMUSG00000031392.19	Irak1	chrX	-	73060735	73061036	73060153	73060303	73061735	73061972	525	43,36,46	0,1,0	38,56,45	0,0,0	450	149	1	1	1.0,0.923,1.0	1.0,1.0,1.0	-0.026		539	ENSMUSG00000068114.8	Ccdc134	chr15	+	82015624	82018963	82015624	82015746	82018781	82018963	539	70,48,54	1,0,0	41,94,36	0,1,0	3184	149	1	1	0.766,1.0,1.0	1.0,0.815,1.0	-0.016		2172	ENSMUSG00000022864.15
526	ENSMUSG00000031392.19	Irak1	chrX	-	73060735	73061117	73060153	73060303	73061735	73061940	526	68,62,82	0,1,0	64,87,79	0,0,0	531	149	1	1	1.0,0.946,1.0	1.0,1.0,1.0	-0.018		544	ENSMUSG00000042303.20	Sgsm3	chr15	+	80888004	80888386	80888004	80888071	80888263	80888386	544	6,1,5	0,0,0	4,9,2	0,1,0	341	149	1	1	1.0,1.0,1.0	1.0,0.797,1.0	0.068		2778	ENSMUSG00000020079.16
527	ENSMUSG00000031392.19	Irak1	chrX	-	73061506	73061623	73060735	73061117	73061735	73061972	527	0,1,1	15,12,11	1,0,3	8,16,20	266	149	1	1	0.0,0.045,0.048	0.065,0.0,0.078	-0.017		546	ENSMUSG00000022407.11	Adsl	chr15	+	80847860	80848228	80847860	80847930	80848080	80848228	546	4,8,12	55,51,64	13,6,7	56,55,83	299	149	0.905456	1	0.035,0.073,0.085	0.104,0.052,0.04	-0.001		155	ENSMUSG00000044906.7
532	ENSMUSG00000031392.19	Irak1	chrX	-	73065790	73065855	73064548	73064667	73066078	73066102	532	2,13,5	0,0,0	6,4,8	0,0,1	214	149	1	1	1.0,1.0,1.0	1.0,1.0,0.848	0.051		551	ENSMUSG00000022420.17	Dnal4	chr15	-	79645653	79646726	79645653	79646250	79646627	79646726	551	29,29,43	0,0,0	34,39,43	1,1,0	526	149	1	1	1.0,1.0,1.0	0.906,0.917,1.0	0.059		27	ENSMUSG00000072964.15
533	ENSMUSG00000031392.19	Irak1	chrX	-	73065790	73065855	73064548	73064667	73066454	73066558	533	0,0,2	0,0,0	0,0,0	2,0,0	214	149	1	1	NA,NA,1.0	0.0,NA,NA	1		557	ENSMUSG00000033728.15	Lrrc14	chr15	+	76597066	76598185	76597066	76597420	76598015	76598185	557	47,36,72	0,1,1	51,54,64	0,0,0	744	149	1	1	1.0,0.878,0.935	1.0,1.0,1.0	-0.062		1173	ENSMUSG00000043510.13
534	ENSMUSG00000031392.19	Irak1	chrX	-	73066078	73066267	73065790	73065855	73066454	73066558	534	12,24,20	0,0,0	14,15,29	0,0,4	338	149	0.241197	1	1.0,1.0,1.0	1.0,1.0,0.762	0.079		561	ENSMUSG00000033762.9	Recql4	chr15	-	76593967	76594398	76593967	76594108	76594300	76594398	561	4,5,5	7,7,10	11,6,7	5,9,19	341	149	0.582623	1	0.2,0.238,0.179	0.49,0.226,0.139	-0.079		1675	ENSMUSG00000027550.15
535	ENSMUSG00000031392.19	Irak1	chrX	-	73066078	73066270	73064605	73064667	73066454	73066550	535	8,9,17	0,0,0	15,12,19	2,0,0	341	149	1	1	1.0,1.0,1.0	0.766,1.0,1.0	0.078		562	ENSMUSG00000022546.6	Gpt	chr15	+	76581358	76581630	76581358	76581448	76581521	76581630	562	2,0,0	2,5,3	0,3,0	1,2,0	222	149	1	1	0.402,0.0,0.0	0.0,0.502,NA	-0.117		1915	ENSMUSG00000018474.19
536	ENSMUSG00000031392.19	Irak1	chrX	-	73066078	73066270	73065790	73065855	73066454	73066550	536	13,29,32	0,0,0	24,22,39	0,0,4	341	149	0.325547	1	1.0,1.0,1.0	1.0,1.0,0.81	0.063		563	ENSMUSG00000022546.6	Gpt	chr15	+	76581741	76582283	76581741	76581875	76582039	76582283	563	0,5,2	0,0,1	1,0,0	0,0,2	313	149	1	1	NA,1.0,0.488	1.0,NA,0.0	0.244		1846	ENSMUSG00000042520.17
537	ENSMUSG00000031386.15	Hcfc1	chrX	-	72995259	72995398	72994848	72995069	72995531	72995674	537	103111140	0,0,0	100136134	0,3,0	288	149	1	1	1.0,1.0,1.0	1.0,0.959,1.0	0.014		564	ENSMUSG00000022546.6	Gpt	chr15	+	76582914	76583351	76582914	76583089	76583195	76583351	564	2,0,0	4,1,6	1,0,3	0,0,3	255	149	1	1	0.226,0.0,0.0	1.0,NA,0.369	-0.609		1895	ENSMUSG00000040434.17
539	ENSMUSG00000031388.15	Naa10	chrX	-	72963107	72963146	72961448	72961533	72963359	72963468	539	2,0,0	0,0,1	0,0,1	0,0,0	188	149	1	1	1.0,NA,0.0	NA,NA,1.0	-0.5		570	ENSMUSG00000034022.9	Cpsf1	chr15	-	76480419	76480771	76480419	76480549	76480615	76480771	570	14,22,31	101,54,57	31,38,29	110,121,97	215	149	0.80349	1	0.088,0.22,0.274	0.163,0.179,0.172	0.023		1116	ENSMUSG00000061136.17
540	ENSMUSG00000031388.15	Naa10	chrX	-	72963107	72963152	72961079	72961533	72963359	72963475	540	59,61,94	0,0,1	86,74,120	0,0,0	194	149	1	1	1.0,1.0,0.986	1.0,1.0,1.0	-0.005		573	ENSMUSG00000034022.9	Cpsf1	chr15	-	76481630	76481930	76481630	76481772	76481845	76481930	573	3,3,12	19,14,28	6,9,4	30,27,27	222	149	0.612851	1	0.096,0.126,0.223	0.118,0.183,0.09	0.018		1397	ENSMUSG00000040721.10
547	ENSMUSG00000002006.13	Pdzd4	chrX	-	72841799	72841898	72840435	72840498	72867887	72868575	547	2,5,0	1,0,0	0,5,6	0,0,0	248	149	1	1	0.546,1.0,NA	NA,1.0,1.0	-0.227		578	ENSMUSG00000022550.19	Adck5	chr15	+	76478137	76478647	76478137	76478251	76478563	76478647	578	2,9,12	0,0,1	4,4,4	0,0,0	461	149	1	1	1.0,1.0,0.795	1.0,1.0,1.0	-0.068		1956	ENSMUSG00000030057.16
548	ENSMUSG00000002006.13	Pdzd4	chrX	-	72842363	72842454	72840435	72840498	72867887	72868575	548	0,0,2	1,0,0	3,0,0	0,0,0	240	149	1	1	0.0,NA,1.0	1.0,NA,NA	-0.5		580	ENSMUSG00000022550.19	Adck5	chr15	+	76478728	76478952	76478728	76478810	76478873	76478952	580	4,0,5	0,2,0	1,0,3	0,0,0	212	149	1	1	1.0,0.0,1.0	1.0,NA,1.0	-0.333		2973	ENSMUSG00000001248.16
550	ENSMUSG00000002006.13	Pdzd4	chrX	-	72843439	72843693	72842363	72842454	72867887	72868575	550	21,24,43	0,0,2	26,43,28	0,0,0	403	149	1	1	1.0,1.0,0.888	1.0,1.0,1.0	-0.037		581	ENSMUSG00000022550.19	Adck5	chr15	+	76479213	76479653	76479213	76479466	76479536	76479653	581	0,2,6	3,7,5	2,3,4	4,10,7	219	149	0.682044	1	0.0,0.163,0.449	0.254,0.17,0.28	-0.031		1094	ENSMUSG00000027284.17
551	ENSMUSG00000002010.18	Idh3g	chrX	-	72825611	72825709	72825282	72825395	72826280	72826322	551	54,50,103	0,1,0	69,81,130	0,2,0	247	149	1	1	1.0,0.968,1.0	1.0,0.961,1.0	0.002		591	ENSMUSG00000022552.17	Sharpin	chr15	-	76231239	76231587	76231239	76231385	76231458	76231587	591	4,1,2	16,8,22	4,1,5	16,24,20	222	149	1	1	0.144,0.077,0.058	0.144,0.027,0.144	-0.012		2035	ENSMUSG00000015749.13
552	ENSMUSG00000002010.18	Idh3g	chrX	-	72825903	72825915	72825611	72825709	72826280	72826322	552	10,7,7	7,7,10	12,12,10	7,13,27	161	149	0.612313	1	0.569,0.481,0.393	0.613,0.461,0.255	0.038		595	ENSMUSG00000022552.17	Sharpin	chr15	-	76232285	76232635	76232285	76232427	76232500	76232635	595	1,1,2	6,3,8	1,1,1	3,7,6	222	149	1	1	0.101,0.183,0.144	0.183,0.087,0.101	0.019		2346	ENSMUSG00000001034.18
553	ENSMUSG00000002015.6	Bcap31	chrX	-	72756050	72756151	72750602	72750750	72758398	72758534	553	79,78,92	0,0,0	85,92,88	1,0,0	250	149	1	1	1.0,1.0,1.0	0.981,1.0,1.0	0.006		598	ENSMUSG00000055762.17	Eef1d	chr15	-	75768091	75768589	75768091	75768313	75768488	75768589	598	6,3,3	174160292	2,2,2	244231281	324	149	1	1	0.016,0.009,0.005	0.004,0.004,0.003	0.006		2700	ENSMUSG00000027469.17
555	ENSMUSG00000031375.18	Bgn	chrX	+	72533473	72533537	72527207	72527368	72534384	72534636	555	0,0,0	5,0,3	0,1,0	0,8,2	213	149	1	1	0.0,NA,0.0	NA,0.08,0.0	-0.04		600	ENSMUSG00000022580.14	Rhpn1	chr15	+	75583639	75584300	75583639	75583747	75584140	75584300	600	18,11,19	1,0,0	6,12,17	0,0,0	542	149	1	1	0.832,1.0,1.0	1.0,1.0,1.0	-0.056		3284	ENSMUSG00000022214.16
558	ENSMUSG00000031351.16	Zfp185	chrX	+	72041343	72041409	72040887	72041011	72042141	72042180	558	3,1,4	0,0,2	10,8,4	0,1,0	215	149	1	1	1.0,1.0,0.581	1.0,0.847,1.0	-0.089		602	ENSMUSG00000022577.18	Ly6h	chr15	-	75437431	75438108	75437431	75437548	75437980	75438108	602	4,11,18	1,10,5	3,17,6	4,4,5	581	149	0.708175	1	0.506,0.22,0.48	0.161,0.522,0.235	0.096		2018	ENSMUSG00000035478.15
559	ENSMUSG00000031351.16	Zfp185	chrX	+	72046180	72046264	72045010	72045052	72046978	72047065	559	8,1,6	0,1,0	9,2,10	0,0,0	233	149	1	1	1.0,0.39,1.0	1.0,1.0,1.0	-0.203		604	ENSMUSG00000002504.16	Slc9a3r2	chr17	-	24860792	24861344	24860792	24860946	24861164	24861344	604	0,1,2	0,4,7	0,0,0	2,1,1	367	149	1	1	NA,0.092,0.104	0.0,0.0,0.0	0.098		785	ENSMUSG00000039318.13
560	ENSMUSG00000031351.16	Zfp185	chrX	+	72046180	72046264	72045010	72045052	72056045	72056234	560	1,1,0	0,0,0	4,5,4	0,0,1	233	149	1	1	1.0,1.0,NA	1.0,1.0,0.719	0.094		615	ENSMUSG00000034616.18	Ssh3	chr19	-	4314341	4315177	4314341	4314488	4315130	4315177	615	1,2,4	1,0,0	2,7,4	0,0,0	791	149	1	1	0.159,1.0,1.0	1.0,1.0,1.0	-0.28		1968	ENSMUSG00000014767.18
561	ENSMUSG00000031351.16	Zfp185	chrX	+	72046978	72047065	72045010	72045052	72056045	72056234	561	0,1,0	0,0,0	0,0,0	0,0,1	236	149	1	1	NA,1.0,NA	NA,NA,0.0	1		620	ENSMUSG00000058600.14	Rpl30	chr15	-	34440650	34442926	34440650	34440750	34442780	34442926	620	135130157	0,0,1	120117119	0,0,0	2179	149	1	1	1.0,1.0,0.915	1.0,1.0,1.0	-0.028		158	ENSMUSG00000040560.11
562	ENSMUSG00000031351.16	Zfp185	chrX	+	72046978	72047065	72046180	72046264	72056045	72056234	562	7,0,6	0,0,0	5,2,6	0,5,0	236	149	1	1	1.0,NA,1.0	1.0,0.202,1.0	0.266		621	ENSMUSG00000022241.7	Tars	chr15	-	11388166	11388546	11388166	11388304	11388383	11388546	621	7,3,2	33,40,80	5,5,4	51,59,62	228	149	0.966612	1	0.122,0.047,0.016	0.06,0.052,0.04	0.011		1646	ENSMUSG00000117694.2
566	ENSMUSG00000015217.12	Hmgb3	chrX	+	70601658	70601813	70599523	70599614	70602038	70602178	566	238206315	0,0,1	175263318	0,0,0	304	149	1	1	1.0,1.0,0.994	1.0,1.0,1.0	-0.002		622	ENSMUSG00000022241.7	Tars	chr15	-	11391899	11392120	11391899	11391978	11392055	11392120	622	7,4,2	37,18,42	5,5,3	35,37,34	226	149	0.882041	1	0.111,0.128,0.03	0.086,0.082,0.055	0.015		2653	ENSMUSG00000042363.15
567	ENSMUSG00000015217.12	Hmgb3	chrX	+	70601662	70601813	70599546	70599614	70602038	70602178	567	176136240	0,0,1	114170205	0,0,0	300	149	1	1	1.0,1.0,0.992	1.0,1.0,1.0	-0.003		626	ENSMUSG00000025558.20	Dock9	chr14	-	121818743	121820952	121818743	121818857	121820769	121820952	626	9,6,14	4,5,5	13,8,12	5,5,9	2061	149	0.76898	1	0.14,0.08,0.168	0.158,0.104,0.088	0.013		2942	ENSMUSG00000040746.16
569	ENSMUSG00000035776.15	Cd99l2	chrX	-	70493544	70493613	70484679	70484751	70494216	70494279	569	13,11,11	0,0,2	16,11,12	0,1,0	218	149	1	1	1.0,1.0,0.79	1.0,0.883,1.0	-0.031		628	ENSMUSG00000042524.15	Sun2	chr15	-	79612063	79612782	79612063	79612285	79612616	79612782	628	1,3,3	2,3,7	2,3,2	6,0,3	480	149	0.614796	1	0.134,0.237,0.117	0.094,1.0,0.171	-0.259		524	ENSMUSG00000059689.16
571	ENSMUSG00000015214.15	Mtmr1	chrX	+	70420492	70420516	70413404	70413510	70422619	70422670	571	0,1,0	0,0,0	0,0,0	1,0,0	173	149	1	1	NA,1.0,NA	0.0,NA,NA	1		632	ENSMUSG00000022561.14	Gpaa1	chr15	+	76216359	76216831	76216359	76216487	76216683	76216831	632	8,9,8	0,2,1	12,5,0	0,1,0	345	149	1	1	1.0,0.66,0.776	1.0,0.683,NA	-0.03		2448	ENSMUSG00000031858.17
572	ENSMUSG00000015214.15	Mtmr1	chrX	+	70420492	70420516	70413404	70413510	70426805	70426881	572	0,1,0	10,7,14	0,0,0	8,3,6	173	149	1	1	0.0,0.11,0.0	0.0,0.0,0.0	0.037		640	ENSMUSG00000037563.16	Rps16	chr7	+	28051601	28051835	28051601	28051698	28051787	28051835	640	3,1,11	601508888	9,2,1	754856982	238	149	1	1	0.003,0.001,0.008	0.007,0.001,0.001	0.001		3040	ENSMUSG00000057594.13
575	ENSMUSG00000015214.15	Mtmr1	chrX	+	70422619	70422670	70413404	70413510	70426805	70426881	575	0,0,0	10,7,14	1,0,0	8,3,6	200	149	1	1	0.0,0.0,0.0	0.085,0.0,0.0	-0.028		644	ENSMUSG00000016503.19	Gtf3a	chr5	+	146890036	146890887	146890036	146890117	146890657	146890887	644	6,7,4	72,56,106	7,2,14	64102110	689	149	0.639621	1	0.018,0.026,0.008	0.023,0.004,0.027	-0.001		956	ENSMUSG00000097451.12
578	ENSMUSG00000015214.15	Mtmr1	chrX	+	70436901	70437051	70436121	70436205	70437882	70437902	578	1,9,14	0,1,0	15,6,10	3,1,0	299	149	0.113152	1	1.0,0.818,1.0	0.714,0.749,1.0	0.118		646	ENSMUSG00000037379.8	Spon2	chr5	-	33373676	33374164	33373676	33373868	33373940	33374164	646	0,0,0	0,1,0	0,2,0	0,1,0	221	149	1	1	NA,0.0,NA	NA,0.574,NA	-0.574		1629	ENSMUSG00000053332.14
579	ENSMUSG00000015214.15	Mtmr1	chrX	+	70437882	70438071	70436121	70436205	70444146	70444332	579	4,6,5	0,0,1	5,4,7	0,0,0	338	149	1	1	1.0,1.0,0.688	1.0,1.0,1.0	-0.104		649	ENSMUSG00000032295.16	Man2c1	chr9	+	57048847	57049199	57048847	57048996	57049089	57049199	649	0,3,0	3,2,6	1,0,1	4,2,8	242	149	1	1	0.0,0.48,0.0	0.133,0.0,0.071	0.092		3033	ENSMUSG00000061028.8
581	ENSMUSG00000073139.10	Tmem185a	chrX	-	69508608	69508692	69506450	69506627	69510759	69510809	581	8,5,9	3,1,7	7,6,5	1,1,4	233	149	0.433515	1	0.63,0.762,0.451	0.817,0.793,0.444	-0.07		659	ENSMUSG00000031066.11	Usp11	chrX	+	20578564	20579221	20578564	20578682	20579075	20579221	659	2,3,1	10,6,13	2,0,6	40,10,19	542	149	0.706287	1	0.052,0.121,0.021	0.014,0.0,0.08	0.033		1273	ENSMUSG00000033396.14
582	ENSMUSG00000073139.10	Tmem185a	chrX	-	69513723	69513900	69510759	69510967	69520583	69520748	582	22,13,14	0,0,0	7,8,35	0,0,2	326	149	1	1	1.0,1.0,1.0	1.0,1.0,0.889	0.037		661	ENSMUSG00000037761.17	Actr5	chr2	+	158477226	158478067	158477226	158477346	158477927	158478067	661	6,11,12	5,7,10	9,9,8	3,8,8	730	149	0.841526	1	0.197,0.243,0.197	0.38,0.187,0.17	-0.033		3301	ENSMUSG00000022089.10
585	ENSMUSG00000041115.17	Iqsec2	chrX	+	151005278	151005328	151004642	151004816	151005917	151008231	585	0,0,0	2,4,1	0,2,0	4,0,6	199	149	0.356054	1	0.0,0.0,0.0	0.0,1.0,0.0	-0.333		662	ENSMUSG00000037761.17	Actr5	chr2	+	158477226	158478067	158477226	158477346	158477946	158478067	662	6,12,16	0,0,0	9,9,8	0,0,1	749	149	1	1	1.0,1.0,1.0	1.0,1.0,0.614	0.129		1847	ENSMUSG00000042520.17
586	ENSMUSG00000035847.16	Ids	chrX	-	69399724	69399853	69396749	69396876	69401872	69402043	586	0,0,0	4,0,6	1,0,0	7,6,3	278	149	1	1	0.0,NA,0.0	0.071,0.0,0.0	-0.024		666	ENSMUSG00000040667.12	Nup88	chr11	-	70834704	70835064	70834704	70834823	70834937	70835064	666	2,4,7	40,21,48	5,6,4	38,35,67	263	149	0.942974	1	0.028,0.097,0.076	0.069,0.089,0.033	0.003		2043	ENSMUSG00000056962.12
587	ENSMUSG00000031189.13	Aff2	chrX	+	68567041	68567162	68404110	68404444	68588014	68588229	587	13,3,11	0,0,2	10,12,7	0,0,0	270	149	1	1	1.0,1.0,0.752	1.0,1.0,1.0	-0.083		679	ENSMUSG00000003526.13	Prodh	chr16	-	17895307	17895747	17895307	17895454	17895654	17895747	679	0,5,2	3,2,8	2,5,2	5,13,17	349	149	0.844534	1	0.0,0.516,0.096	0.146,0.141,0.048	0.092		3105	ENSMUSG00000034157.13
588	ENSMUSG00000031189.13	Aff2	chrX	+	68567041	68567174	68403899	68404444	68588014	68588875	588	6,7,6	0,0,2	0,7,7	0,0,0	282	149	1	1	1.0,1.0,0.613	NA,1.0,1.0	-0.129		687	ENSMUSG00000006154.14	Eps8l1	chr7	+	4480888	4481750	4480888	4480997	4481617	4481750	687	1,2,0	1,0,0	4,4,5	0,0,0	769	149	1	1	0.162,1.0,NA	1.0,1.0,1.0	-0.419		361	ENSMUSG00000033918.17
593	ENSMUSG00000031431.14	Tsc22d3	chrX	-	139442853	139442905	139440276	139441856	139443259	139443417	593	16,7,22	0,1,0	19,14,22	0,0,0	201	149	1	1	1.0,0.838,1.0	1.0,1.0,1.0	-0.054		688	ENSMUSG00000035545.14	Leng8	chr7	+	4147051	4147812	4147051	4147337	4147710	4147812	688	10,2,3	20,37,39	8,5,5	61,36,51	522	149	0.659521	1	0.125,0.015,0.021	0.036,0.038,0.027	0.02		2727	ENSMUSG00000015305.7
594	ENSMUSG00000071753.14	Cdr1os	chrX	+	60165617	60165765	60162947	60163030	60176971	60177109	594	0,1,0	0,0,2	0,2,0	0,0,0	297	149	1	1	NA,1.0,0.0	NA,1.0,NA	-0.5		690	ENSMUSG00000035585.17	Tsen34	chr7	+	3697596	3698226	3697596	3697843	3697976	3698226	690	0,2,4	116116163	0,5,2	144132207	282	149	1	1	0.0,0.009,0.013	0.0,0.02,0.005	-0.001		653	ENSMUSG00000022335.18
598	ENSMUSG00000087365.8	C430049B03Rik	chrX	-	52144732	52145041	52144083	52144367	52145534	52145646	598	3,3,0	0,0,0	3,4,1	0,0,2	458	149	1	1	1.0,1.0,NA	1.0,1.0,0.14	0.287		702	ENSMUSG00000031146.7	Plp2	chrX	-	7535653	7535997	7535653	7535749	7535841	7535997	702	1,0,0	35,45,79	0,3,0	55,57,69	241	149	1	1	0.017,0.0,0.0	0.0,0.032,0.0	-0.005		682	ENSMUSG00000041147.11
601	ENSMUSG00000036109.18	Mbnl3	chrX	-	50253294	50253541	50228080	50228245	50294650	50294867	601	17,12,18	2,3,4	8,11,11	4,2,1	396	149	0.857392	1	0.762,0.601,0.629	0.429,0.674,0.805	0.028		707	ENSMUSG00000025225.16	Nfkb2	chr19	+	46297303	46297735	46297303	46297513	46297593	46297735	707	0,0,0	22,7,8	0,0,2	8,16,7	229	149	1	1	0.0,0.0,0.0	0.0,0.0,0.157	-0.052		2061	ENSMUSG00000031565.19
603	ENSMUSG00000085396.8	Firre	chrX	-	49651556	49651831	49647014	49647261	49653689	49653760	603	6,12,13	0,0,0	19,24,30	1,0,0	424	149	1	1	1.0,1.0,1.0	0.87,1.0,1.0	0.043		713	ENSMUSG00000004266.16	Ptpn6	chr6	-	124697669	124698185	124697669	124697871	124698042	124698185	713	0,0,6	5,0,0	3,5,0	2,1,1	320	149	1	1	0.0,NA,1.0	0.411,0.7,0.0	0.13		156	ENSMUSG00000044906.7
604	ENSMUSG00000085396.8	Firre	chrX	-	49661891	49662018	49658153	49659168	49662100	49662228	604	19,12,19	4,4,4	34,30,9	7,3,7	276	149	0.889378	1	0.719,0.618,0.719	0.724,0.844,0.41	0.026		723	ENSMUSG00000006005.19	Tpr	chr1	+	150321618	150321992	150321618	150321714	150321835	150321992	723	2,2,0	81,60,98	1,3,3	112142126	270	149	1	1	0.013,0.018,0.0	0.005,0.012,0.013	0		194	ENSMUSG00000045394.10
605	ENSMUSG00000085396.8	Firre	chrX	-	49669457	49669826	49666747	49666901	49670279	49670433	605	38,23,39	0,0,0	79,42,31	0,2,1	518	149	0.772631	1	1.0,1.0,1.0	1.0,0.858,0.899	0.081		731	ENSMUSG00000027087.12	Itgav	chr2	+	83633583	83637260	83633583	83633680	83636976	83637260	731	340293403	0,0,0	426448433	0,0,1	3445	149	1	1	1.0,1.0,1.0	1.0,1.0,0.949	0.017		2033	ENSMUSG00000029166.15
606	ENSMUSG00000085396.8	Firre	chrX	-	49669689	49669826	49666747	49666901	49670279	49670433	606	4,5,4	0,0,0	13,10,5	0,2,1	286	149	0.704836	1	1.0,1.0,1.0	1.0,0.723,0.723	0.185		746	ENSMUSG00000039623.14	Ap5z1	chr5	+	142456148	142458139	142456148	142456311	142457957	142458139	746	20,11,14	17,3,2	21,23,14	6,11,7	1795	149	0.926963	1	0.089,0.233,0.368	0.225,0.148,0.142	0.058		3220	ENSMUSG00000046169.11
607	ENSMUSG00000085396.8	Firre	chrX	-	49680801	49680962	49673555	49673724	49684337	49684492	607	12,8,23	0,0,2	22,20,20	1,0,1	310	149	1	1	1.0,1.0,0.847	0.914,1.0,0.906	0.009		747	ENSMUSG00000043088.17	Il17re	chr6	+	113443069	113443368	113443069	113443115	113443213	113443368	747	0,1,0	2,2,3	0,0,1	0,5,2	247	149	1	1	0.0,0.232,0.0	NA,0.0,0.232	-0.039		1177	ENSMUSG00000034101.15
608	ENSMUSG00000085396.8	Firre	chrX	-	49680801	49680962	49673555	49673724	49687010	49687165	608	13,8,22	0,0,0	22,19,22	0,1,0	310	149	1	1	1.0,1.0,1.0	1.0,0.901,1.0	0.033		751	ENSMUSG00000014601.14	Strip1	chr3	-	107523076	107523924	107523076	107523143	107523823	107523924	751	16,9,7	19,18,26	26,20,8	36,33,35	829	149	0.904658	1	0.131,0.082,0.046	0.115,0.098,0.039	0.002		1239	ENSMUSG00000026939.13
609	ENSMUSG00000085396.8	Firre	chrX	-	49684337	49684492	49673555	49673724	49687010	49687165	609	11,5,14	0,0,0	13,9,11	0,1,0	304	149	1	1	1.0,1.0,1.0	1.0,0.815,1.0	0.062		756	ENSMUSG00000056724.16	Nbeal2	chr9	-	110457461	110457817	110457461	110457571	110457686	110457817	756	0,4,0	0,0,4	0,1,2	3,3,1	264	149	1	1	NA,1.0,0.0	0.0,0.158,0.53	0.271		822	ENSMUSG00000029106.15
610	ENSMUSG00000085396.8	Firre	chrX	-	49684337	49684492	49680801	49680962	49687010	49687165	610	11,5,13	1,0,0	12,10,10	0,0,2	304	149	1	1	0.844,1.0,1.0	1.0,1.0,0.71	0.045		759	ENSMUSG00000043866.12	Taf10	chr7	-	105392432	105392699	105392432	105392547	105392634	105392699	759	1,2,2	116150245	4,2,6	152196201	236	149	0.754391	1	0.005,0.008,0.005	0.016,0.006,0.018	-0.007		668	ENSMUSG00000021262.16
611	ENSMUSG00000085396.8	Firre	chrX	-	49692315	49692402	49689620	49689775	49697354	49697481	611	7,9,5	1,0,0	16,31,18	0,0,0	236	149	1	1	0.815,1.0,1.0	1.0,1.0,1.0	-0.062		764	ENSMUSG00000021234.10	Fam161b	chr12	-	84402697	84404624	84402697	84403251	84404301	84404624	764	1,3,1	2,2,1	0,1,0	0,0,0	1199	149	1	1	0.059,0.157,0.111	NA,1.0,NA	-0.891		2992	ENSMUSG00000075595.10
612	ENSMUSG00000085396.8	Firre	chrX	-	49697354	49697481	49689620	49689775	49697563	49697691	612	2,2,0	0,1,4	1,1,1	2,0,1	276	149	0.454061	1	1.0,0.519,0.0	0.213,1.0,0.351	-0.015		766	ENSMUSG00000069678.11	Pcgf1	chr6	+	83057530	83057835	83057530	83057611	83057690	83057835	766	1,0,0	9,4,8	0,0,0	8,4,14	228	149	1	1	0.068,0.0,0.0	0.0,0.0,0.0	0.023		2740	ENSMUSG00000015120.16
613	ENSMUSG00000085396.8	Firre	chrX	-	49701581	49701727	49697563	49697691	49704237	49704392	613	37,26,38	2,0,0	53,61,44	0,0,0	295	149	1	1	0.903,1.0,1.0	1.0,1.0,1.0	-0.032		770	ENSMUSG00000031862.12	Atp13a1	chr8	+	70251036	70251371	70251036	70251163	70251233	70251371	770	26,14,24	19,20,12	21,37,34	22,21,28	219	149	0.91711	1	0.482,0.323,0.576	0.394,0.545,0.452	-0.003		2747	ENSMUSG00000087177.8
614	ENSMUSG00000085396.8	Firre	chrX	-	49709551	49709681	49704387	49704392	49715313	49715386	614	5,6,12	18,10,6	7,16,9	19,31,21	279	149	0.396998	1	0.129,0.243,0.516	0.164,0.216,0.186	0.107		773	ENSMUSG00000022620.15	Arsa	chr15	-	89358742	89359208	89358742	89358912	89358989	89359208	773	2,0,0	0,2,0	1,0,0	0,1,2	226	149	1	1	1.0,0.0,NA	1.0,0.0,0.0	0.167		2930	ENSMUSG00000020910.17
615	ENSMUSG00000085396.8	Firre	chrX	-	49716083	49716127	49715313	49715386	49719767	49719872	615	8,5,7	4,4,11	3,7,13	5,4,10	193	149	0.874361	1	0.607,0.491,0.329	0.317,0.575,0.501	0.011		782	ENSMUSG00000023755.11	Rhebl1	chr15	-	98776333	98776936	98776333	98776474	98776888	98776936	782	17,8,8	0,0,0	15,21,10	0,0,1	563	149	1	1	1.0,1.0,1.0	1.0,1.0,0.726	0.091		1734	ENSMUSG00000022974.13
616	ENSMUSG00000085396.8	Firre	chrX	-	49716083	49716186	49715313	49715386	49719767	49719872	616	17,27,24	4,4,11	26,21,14	5,4,10	252	149	0.779854	1	0.715,0.8,0.563	0.755,0.756,0.453	0.038		787	ENSMUSG00000022562.16	Oplah	chr15	-	76181818	76182240	76181818	76181968	76182105	76182240	787	0,0,0	0,0,2	1,0,0	0,0,0	286	149	1	1	NA,NA,0.0	1.0,NA,NA	-1		455	ENSMUSG00000022570.8
618	ENSMUSG00000031109.17	Enox2	chrX	-	48102009	48102057	48098583	48100511	48102373	48102459	618	0,3,2	0,2,1	4,4,2	0,3,6	197	149	1	1	NA,0.532,0.602	1.0,0.502,0.201	-0.001		789	ENSMUSG00000002997.16	Prkar2b	chr12	-	32008474	32010521	32008474	32008720	32010380	32010521	789	164152245	0,0,0	203187212	1,0,1	1809	149	1	1	1.0,1.0,1.0	0.944,1.0,0.946	0.037		281	ENSMUSG00000052752.16
619	ENSMUSG00000031109.17	Enox2	chrX	-	48158511	48158667	48151019	48151226	48169493	48169628	619	8,7,13	0,0,0	16,5,13	2,0,0	305	149	1	1	1.0,1.0,1.0	0.796,1.0,1.0	0.068		792	ENSMUSG00000027778.16	Ift80	chr3	-	68898074	68901915	68898074	68898296	68901833	68901915	792	73,49,83	11,5,11	110,93,69	14,5,13	3686	149	0.731988	1	0.212,0.284,0.234	0.241,0.429,0.177	-0.039		1955	ENSMUSG00000030057.16
620	ENSMUSG00000031109.17	Enox2	chrX	-	48257517	48257661	48169493	48169628	48375721	48375781	620	1,5,11	1,0,0	8,3,7	2,0,0	293	149	1	1	0.337,1.0,1.0	0.67,1.0,1.0	-0.111		794	ENSMUSG00000026209.16	Dnpep	chr1	-	75293184	75293447	75293184	75293273	75293353	75293447	794	0,0,0	24,26,37	2,2,0	28,53,46	229	149	0.666468	1	0.0,0.0,0.0	0.044,0.024,0.0	-0.023		2171	ENSMUSG00000022864.15
621	ENSMUSG00000031109.17	Enox2	chrX	-	48257517	48257661	48169493	48169628	48375732	48375781	621	0,5,7	0,0,0	4,7,2	2,0,0	293	149	1	1	NA,1.0,1.0	0.504,1.0,1.0	0.165		796	ENSMUSG00000062006.13	Rpl34	chr3	-	130522699	130522951	130522699	130522799	130522877	130522951	796	5,14,6	205202351	15,6,9	255281314	227	149	0.809105	1	0.016,0.044,0.011	0.037,0.014,0.018	0.001		841	ENSMUSG00000038552.15
624	ENSMUSG00000031105.17	Slc25a14	chrX	+	47712838	47713074	47712454	47712705	47714472	47714517	624	0,2,2	0,0,0	0,0,1	0,1,0	385	149	1	1	NA,1.0,1.0	NA,0.0,1.0	0.5		797	ENSMUSG00000036591.17	Arhgap21	chr2	-	20860164	20860517	20860164	20860206	20860391	20860517	797	12,7,10	43,28,32	10,13,10	29,46,32	334	149	0.738299	1	0.111,0.1,0.122	0.133,0.112,0.122	-0.011		445	ENSMUSG00000033728.15
625	ENSMUSG00000031105.17	Slc25a14	chrX	+	47712838	47713074	47712454	47712705	47718128	47718222	625	0,2,2	1,1,5	0,0,1	3,0,2	385	149	1	1	0.0,0.436,0.134	0.0,NA,0.162	0.109		802	ENSMUSG00000000902.14	Smarcb1	chr10	-	75740217	75742030	75740217	75740408	75741863	75742030	802	30,19,16	38,18,28	32,29,12	22,46,38	1604	149	0.676039	1	0.068,0.089,0.05	0.119,0.055,0.028	0.002		2347	ENSMUSG00000001034.18
626	ENSMUSG00000031105.17	Slc25a14	chrX	+	47712838	47713083	47712454	47712705	47714472	47714517	626	0,2,2	0,0,0	0,0,1	0,1,0	394	149	1	1	NA,1.0,1.0	NA,0.0,1.0	0.5		806	ENSMUSG00000035711.6	Dok3	chr13	-	55675144	55676367	55675144	55675450	55676261	55676367	806	3,4,10	0,0,2	5,5,6	0,0,0	960	149	0.683826	1	1.0,1.0,0.437	1.0,1.0,1.0	-0.188		1507	ENSMUSG00000015363.14
627	ENSMUSG00000031105.17	Slc25a14	chrX	+	47712838	47713083	47712454	47712705	47718128	47718222	627	0,2,2	1,1,5	0,1,1	3,0,2	394	149	0.386112	1	0.0,0.431,0.131	0.0,1.0,0.159	-0.199		814	ENSMUSG00000033540.19	Idua	chr5	+	108827976	108828363	108827976	108828072	108828160	108828363	814	0,0,0	0,1,0	5,1,0	3,6,3	237	149	1	1	NA,0.0,NA	0.512,0.095,0.0	-0.202		2642	ENSMUSG00000040599.14
632	ENSMUSG00000036916.14	Zfp280c	chrX	-	47632461	47632580	47632281	47632318	47636141	47636204	632	11,27,30	5,1,2	26,35,30	4,5,6	268	149	0.455883	1	0.55,0.938,0.893	0.783,0.796,0.735	0.022		815	ENSMUSG00000033540.19	Idua	chr5	+	108827976	108828363	108827976	108828072	108828260	108828363	815	2,1,0	0,0,0	12,5,1	0,0,1	337	149	1	1	1.0,1.0,NA	1.0,1.0,0.307	0.231		1918	ENSMUSG00000047153.5
633	ENSMUSG00000036916.14	Zfp280c	chrX	-	47677579	47677626	47667256	47667406	47680549	47680638	633	9,3,12	0,0,0	8,16,11	0,0,2	196	149	1	1	1.0,1.0,1.0	1.0,1.0,0.807	0.064		817	ENSMUSG00000038520.16	Tbc1d17	chr7	-	44491406	44491724	44491406	44491523	44491626	44491724	817	3,1,2	4,8,7	4,1,5	8,7,13	252	149	0.576466	1	0.307,0.069,0.145	0.228,0.078,0.185	0.01		603	ENSMUSG00000029034.10
634	ENSMUSG00000036916.14	Zfp280c	chrX	-	47682390	47682475	47680549	47680638	47683240	47683268	634	0,3,2	0,1,6	0,0,1	0,2,0	234	149	1	1	NA,0.656,0.175	NA,0.0,1.0	-0.085		826	ENSMUSG00000002825.9	Qtrt1	chr9	+	21323528	21323827	21323528	21323597	21323688	21323827	826	6,1,4	4,6,10	2,2,1	0,4,9	240	149	0.83462	1	0.482,0.094,0.199	1.0,0.237,0.065	-0.176		1622	ENSMUSG00000022948.17
637	ENSMUSG00000063785.13	Utp14a	chrX	+	47357730	47357798	47352353	47352509	47361676	47361796	637	0,1,0	2,4,1	0,0,0	1,0,5	217	149	1	1	0.0,0.147,0.0	0.0,NA,0.0	0.049		827	ENSMUSG00000002825.9	Qtrt1	chr9	+	21330734	21331008	21330734	21330844	21330920	21331008	827	5,8,12	22,27,34	7,11,14	26,42,48	225	149	0.873839	1	0.131,0.164,0.189	0.151,0.148,0.162	0.008		689	ENSMUSG00000063047.10
638	ENSMUSG00000063785.13	Utp14a	chrX	+	47361898	47361993	47361676	47361796	47362566	47362690	638	15,12,13	0,0,0	6,8,23	0,0,1	244	149	1	1	1.0,1.0,1.0	1.0,1.0,0.934	0.022		834	ENSMUSG00000021262.16	Evl	chr12	+	108649453	108649669	108649453	108649520	108649606	108649669	834	22,11,12	29,20,35	6,25,26	36,33,48	235	149	0.674541	1	0.325,0.259,0.179	0.096,0.324,0.256	0.029		2266	ENSMUSG00000028391.17
639	ENSMUSG00000063785.13	Utp14a	chrX	+	47367544	47367644	47367243	47367437	47370938	47371330	639	82,68,148	0,0,0	110,97,161	0,0,1	249	149	1	1	1.0,1.0,1.0	1.0,1.0,0.99	0.003		836	ENSMUSG00000001687.16	Ubl3	chr5	-	148488966	148489599	148488966	148489397	148489447	148489599	836	7,5,2	0,0,0	1,10,16	0,0,1	199	149	1	1	1.0,1.0,1.0	1.0,1.0,0.923	0.026		2284	ENSMUSG00000070425.14
642	ENSMUSG00000037475.16	Thoc2	chrX	-	40895910	40896048	40895521	40895591	40901335	40901371	642	56,47,67	0,0,1	67,61,71	0,0,0	287	149	1	1	1.0,1.0,0.972	1.0,1.0,1.0	-0.009		837	ENSMUSG00000050855.17	Zfp940	chr7	-	29545893	29546385	29545893	29545989	29546258	29546385	837	10,5,4	10,6,4	3,17,3	4,4,5	418	149	0.606108	1	0.263,0.229,0.263	0.211,0.602,0.176	-0.078		2329	ENSMUSG00000030733.11
643	ENSMUSG00000037475.16	Thoc2	chrX	-	40962758	40962829	40961441	40961563	40968762	40968814	643	85,40,86	1,0,0	46,82,72	0,0,0	220	149	1	1	0.983,1.0,1.0	1.0,1.0,1.0	-0.006		838	ENSMUSG00000037300.20	Ttc13	chr8	-	125400186	125400474	125400186	125400266	125400395	125400474	838	2,3,8	19,14,13	7,3,3	12,6,30	278	149	0.957502	1	0.053,0.103,0.248	0.238,0.211,0.051	-0.032		1216	ENSMUSG00000035173.15
644	ENSMUSG00000037475.16	Thoc2	chrX	-	40968762	40968814	40962758	40962829	40970785	40970877	644	30,15,40	0,0,1	15,24,26	0,0,0	201	149	1	1	1.0,1.0,0.967	1.0,1.0,1.0	-0.011		839	ENSMUSG00000005506.17	Celf1	chr2	+	90843582	90849842	90843582	90843747	90843835	90849842	839	3,14,13	5,9,17	10,10,14	13,11,18	237	149	0.725714	1	0.274,0.494,0.325	0.326,0.364,0.328	0.025		739	ENSMUSG00000043940.16
647	ENSMUSG00000000355.14	Mcts1	chrX	+	37690805	37690958	37689531	37689655	37691452	37691550	647	4,22,16	0,0,0	21,12,19	0,1,0	302	149	1	1	1.0,1.0,1.0	1.0,0.856,1.0	0.048		846	ENSMUSG00000030816.9	Rnf40	chr7	+	127196300	127196714	127196300	127196513	127196588	127196714	846	2,0,0	10,2,12	0,0,2	2,2,10	224	149	1	1	0.117,0.0,0.0	0.0,0.0,0.117	0		1549	ENSMUSG00000074797.12
657	ENSMUSG00000037636.7	Slc25a43	chrX	+	36015785	36016027	36007311	36007671	36021420	36021593	657	2,0,0	0,0,0	0,0,4	0,0,1	391	149	1	1	1.0,NA,NA	NA,NA,0.604	0.396		847	ENSMUSG00000019254.17	Ppp1r12c	chr7	-	4486472	4486732	4486472	4486556	4486641	4486732	847	1,0,2	5,2,6	0,2,0	0,2,5	234	149	1	1	0.113,0.0,0.175	NA,0.389,0.0	-0.099		2609	ENSMUSG00000034211.15
658	ENSMUSG00000059708.13	Akap17b	chrX	-	35887220	35887989	35882255	35882386	35900125	35900227	658	11,6,19	0,0,0	9,12,6	0,0,1	918	149	1	1	1.0,1.0,1.0	1.0,1.0,0.493	0.169		849	ENSMUSG00000029547.11	Ints1	chr5	-	139761086	139761429	139761086	139761185	139761375	139761429	849	30,38,57	0,0,1	30,50,46	0,0,1	339	149	1	1	1.0,1.0,0.962	1.0,1.0,0.953	0.003		211	ENSMUSG00000042625.17
659	ENSMUSG00000059708.13	Akap17b	chrX	-	35900125	35900227	35887220	35887989	35908702	35908749	659	4,1,4	0,0,1	2,5,6	0,0,0	251	149	1	1	1.0,1.0,0.704	1.0,1.0,1.0	-0.099		850	ENSMUSG00000040687.17	Madd	chr2	-	90988329	90988833	90988329	90988488	90988749	90988833	850	0,1,1	1,1,2	2,0,0	0,6,0	410	149	1	1	0.0,0.267,0.154	1.0,0.0,NA	-0.36		2970	ENSMUSG00000026048.17
660	ENSMUSG00000016239.12	Lonrf3	chrX	+	35603172	35603328	35598864	35598987	35605275	35605407	660	2,0,0	0,0,0	0,0,0	3,0,1	305	149	1	1	1.0,NA,NA	0.0,NA,0.0	1		851	ENSMUSG00000040687.17	Madd	chr2	-	90988329	90988833	90988329	90988488	90988752	90988833	851	0,1,1	0,0,0	2,0,0	0,3,0	413	149	1	1	NA,1.0,1.0	1.0,0.0,NA	0.5		2998	ENSMUSG00000038437.12
677	ENSMUSG00000001924.16	Uba1	chrX	+	20525438	20525535	20524659	20524765	20534687	20534804	677	0,0,3	9,6,25	5,0,0	19,18,26	246	149	0.869912	1	0.0,0.0,0.068	0.137,0.0,0.0	-0.023		852	ENSMUSG00000040687.17	Madd	chr2	-	90988329	90988833	90988329	90988488	90988761	90988833	852	0,1,0	0,2,2	2,0,0	2,0,4	422	149	1	1	NA,0.15,0.0	0.261,NA,0.0	-0.056		950	ENSMUSG00000097451.12
678	ENSMUSG00000001924.16	Uba1	chrX	+	20536979	20537112	20536782	20536873	20537594	20537692	678	175122196	0,0,0	184175203	2,0,0	282	149	1	1	1.0,1.0,1.0	0.98,1.0,1.0	0.007		860	ENSMUSG00000022587.15	Ly6e	chr15	+	74830117	74831180	74830117	74830237	74830341	74831180	860	1,0,0	12,14,22	0,0,0	13,15,15	253	149	1	1	0.047,0.0,0.0	0.0,0.0,0.0	0.016		2412	ENSMUSG00000033016.17
679	ENSMUSG00000001924.16	Uba1	chrX	+	20538482	20538587	20538209	20538386	20538673	20538754	679	138128120	0,0,0	152150208	0,0,1	254	149	1	1	1.0,1.0,1.0	1.0,1.0,0.992	0.003		864	ENSMUSG00000004952.14	Rasa4	chr5	+	136133369	136134593	136133369	136133507	136134457	136134593	864	2,1,4	1,4,1	1,0,1	2,1,4	1099	149	1	1	0.213,0.033,0.352	0.063,0.0,0.033	0.167		1119	ENSMUSG00000040225.16
680	ENSMUSG00000031060.17	Rbm10	chrX	+	20501969	20502153	20486212	20486353	20505671	20505741	680	55,65,81	0,0,2	71,73,96	1,0,0	333	149	1	1	1.0,1.0,0.948	0.969,1.0,1.0	-0.007		866	ENSMUSG00000048758.15	Rpl29	chr9	+	106308267	106308766	106308267	106308531	106308627	106308766	866	156010972232	3,1,1	195820552368	0,0,2	245	149	1	1	0.997,0.999,0.999	1.0,1.0,0.999	-0.001		1371	ENSMUSG00000030213.13
681	ENSMUSG00000031060.17	Rbm10	chrX	+	20503664	20503895	20501969	20502153	20505671	20505741	681	28,20,41	12,13,22	28,26,43	21,27,24	380	149	0.195083	1	0.478,0.376,0.422	0.343,0.274,0.413	0.082		867	ENSMUSG00000005373.14	Mlxipl	chr5	+	135162105	135162513	135162105	135162262	135162397	135162513	867	4,2,1	0,1,0	0,1,0	0,0,0	284	149	1	1	1.0,0.512,1.0	NA,1.0,NA	-0.163		3038	ENSMUSG00000025377.15
685	ENSMUSG00000060090.17	Rp2	chrX	+	20243119	20243785	20230719	20231067	20247943	20248058	685	45,49,73	0,0,0	64,55,85	0,0,1	815	149	1	1	1.0,1.0,1.0	1.0,1.0,0.94	0.02		871	ENSMUSG00000005378.18	Bud23	chr5	-	135084881	135085238	135084881	135084940	135085192	135085238	871	3,2,7	47,21,57	3,4,0	19,28,34	401	149	0.594613	1	0.023,0.034,0.044	0.055,0.05,0.0	-0.001		3150	ENSMUSG00000054874.13
688	ENSMUSG00000031010.18	Usp9x	chrX	+	12938453	12938564	12937736	12937972	12960162	12960416	688	51,50,61	1,3,3	91,74,92	2,1,2	260	149	0.178881	1	0.967,0.905,0.921	0.963,0.977,0.963	-0.037		872	ENSMUSG00000040532.15	Abhd11	chr5	+	135039740	135040234	135039740	135039914	135040063	135040234	872	1,6,5	9,8,15	2,9,6	14,13,24	298	149	0.970188	1	0.053,0.273,0.143	0.067,0.257,0.111	0.011		3291	ENSMUSG00000029439.15
689	ENSMUSG00000031010.18	Usp9x	chrX	+	12989406	12989749	12987671	12987759	12990806	12990902	689	97109117	0,0,0	127,99,145	0,1,0	492	149	1	1	1.0,1.0,1.0	1.0,0.968,1.0	0.011		873	ENSMUSG00000040532.15	Abhd11	chr5	+	135039740	135040234	135039740	135039914	135040094	135040234	873	4,8,6	0,0,0	2,11,6	0,1,0	329	149	1	1	1.0,1.0,1.0	1.0,0.833,1.0	0.056		2651	ENSMUSG00000034858.17
690	ENSMUSG00000031010.18	Usp9x	chrX	+	13017508	13017682	13014183	13014374	13020330	13020472	690	40,40,66	0,0,0	38,49,49	0,0,1	323	149	1	1	1.0,1.0,1.0	1.0,1.0,0.958	0.014		875	ENSMUSG00000029674.14	Limk1	chr5	-	134690242	134690712	134690242	134690407	134690646	134690712	875	2,0,7	0,1,0	8,3,2	0,0,0	388	149	1	1	1.0,0.0,1.0	1.0,1.0,1.0	-0.333		2296	ENSMUSG00000021693.21
691	ENSMUSG00000040363.16	Bcor	chrX	-	11905150	11905307	11902978	11904156	11905488	11905566	691	38,32,42	0,0,0	36,39,27	0,3,0	306	149	0.795164	1	1.0,1.0,1.0	1.0,0.864,1.0	0.045		877	ENSMUSG00000000738.19	Spg7	chr8	+	123806152	123807549	123806152	123806278	123807375	123807549	877	47,22,43	1,0,0	46,45,48	0,0,0	1246	149	1	1	0.849,1.0,1.0	1.0,1.0,1.0	-0.05		2822	ENSMUSG00000025786.18
693	ENSMUSG00000040363.16	Bcor	chrX	-	12002639	12003439	12000562	12001108	12026527	12026585	693	7,1,2	0,1,0	11,4,4	0,0,0	949	149	1	1	1.0,0.136,1.0	1.0,1.0,1.0	-0.288		879	ENSMUSG00000070493.4	Chchd2	chr5	-	129911269	129913024	129911269	129911420	129912774	129913024	879	20,17,22	83,63,63	20,29,23	61,104,69	1503	149	0.664538	1	0.023,0.026,0.033	0.031,0.027,0.032	-0.003		3111	ENSMUSG00000004677.18
694	ENSMUSG00000040363.16	Bcor	chrX	-	12003623	12003709	12002639	12003439	12026527	12026585	694	0,0,0	0,1,0	4,0,2	0,0,0	235	149	1	1	NA,0.0,NA	1.0,NA,1.0	-1		883	ENSMUSG00000020362.14	Cnot6	chr11	-	49575913	49576179	49575913	49575982	49576089	49576179	883	14,21,26	64106148	17,10,23	68,89,110	256	149	0.868407	1	0.113,0.103,0.093	0.127,0.061,0.108	0.004		290	ENSMUSG00000062012.15
696	ENSMUSG00000031171.12	Ftsj1	chrX	-	8111790	8111888	8111522	8111669	8112574	8112595	696	6,1,2	0,0,0	5,14,7	1,0,0	247	149	1	1	1.0,1.0,1.0	0.751,1.0,1.0	0.083		887	ENSMUSG00000023707.14	Ogfod2	chr5	+	124252127	124252708	124252127	124252255	124252450	124252708	887	0,3,4	0,1,2	1,3,0	6,12,3	344	149	1	1	NA,0.565,0.464	0.067,0.098,0.0	0.459		1618	ENSMUSG00000029625.17
697	ENSMUSG00000031169.14	Porcn	chrX	-	8064213	8064324	8060086	8060516	8065305	8065391	697	2,0,0	0,1,0	6,6,2	0,0,0	260	149	1	1	1.0,0.0,NA	1.0,1.0,1.0	-0.5		892	ENSMUSG00000004455.17	Ppp1cc	chr5	+	122310794	122311343	122310794	122310866	122311208	122311343	892	90,89,130	0,0,4	75,74,111	1,2,0	491	149	0.647924	1	1.0,1.0,0.908	0.958,0.918,1.0	0.011		2851	ENSMUSG00000031570.18
700	ENSMUSG00000031169.14	Porcn	chrX	-	8069264	8069282	8067682	8067808	8069397	8069528	700	0,0,0	0,1,0	0,1,0	2,5,1	167	149	1	1	NA,0.0,NA	0.0,0.151,0.0	-0.05		895	ENSMUSG00000008450.9	Nutf2	chr8	+	106602985	106603240	106602985	106603057	106603141	106603240	895	12,7,9	238209277	5,12,12	199255298	233	149	0.978654	1	0.031,0.021,0.02	0.016,0.029,0.025	0.001		17	ENSMUSG00000025283.16
704	ENSMUSG00000039201.11	Tbc1d25	chrX	-	8038976	8039131	8022554	8023017	8040439	8040549	704	16,7,17	2,0,0	15,11,15	0,0,0	304	149	1	1	0.797,1.0,1.0	1.0,1.0,1.0	-0.068		902	ENSMUSG00000053693.17	Mast1	chr8	-	85650357	85650742	85650357	85650568	85650656	85650742	902	2,0,1	0,0,0	0,0,1	2,0,0	237	149	1	1	1.0,NA,1.0	0.0,NA,1.0	0.5		1066	ENSMUSG00000062929.9
706	ENSMUSG00000031167.17	Rbm3	chrX	-	8010811	8010918	8010086	8010186	8011193	8011311	706	134,81,191	0,0,0	100141178	0,1,1	256	149	1	1	1.0,1.0,1.0	1.0,0.988,0.99	0.007		904	ENSMUSG00000041638.19	Gcn1	chr5	+	115712637	115713355	115712637	115712701	115713223	115713355	904	6,11,3	79,50,82	6,7,9	80,84,105	671	149	0.728415	1	0.017,0.047,0.008	0.016,0.018,0.019	0.006		36	ENSMUSG00000056537.12
707	ENSMUSG00000031166.14	Wdr13	chrX	-	7995207	7995515	7994272	7994453	7996241	7996372	707	11,14,31	0,0,4	8,27,23	3,0,0	457	149	0.297198	1	1.0,1.0,0.716	0.465,1.0,1.0	0.084		907	ENSMUSG00000001632.17	Brpf1	chr6	+	113298689	113299047	113298689	113298826	113298928	113299047	907	8,7,8	10,2,8	6,11,6	10,4,7	251	149	0.837005	1	0.322,0.675,0.372	0.263,0.62,0.337	0.05		184	ENSMUSG00000024921.18
708	ENSMUSG00000039231.19	Suv39h1	chrX	-	7936826	7937489	7929934	7930296	7938561	7938707	708	179208291	1,0,0	164211213	1,1,0	812	149	1	1	0.97,1.0,1.0	0.968,0.975,1.0	0.009		909	ENSMUSG00000041354.17	Rgl2	chr17	+	34151013	34151345	34151013	34151192	34151294	34151345	909	2,9,2	4,5,12	5,5,3	9,3,6	251	149	0.712434	1	0.229,0.517,0.09	0.248,0.497,0.229	-0.046		3225	ENSMUSG00000025451.16
709	ENSMUSG00000039231.19	Suv39h1	chrX	-	7938561	7938707	7936667	7937489	7940782	7940860	709	35,25,68	0,0,0	31,31,42	0,1,0	295	149	1	1	1.0,1.0,1.0	1.0,0.94,1.0	0.02		911	ENSMUSG00000029503.17	P2rx2	chr5	-	110487677	110488448	110487677	110488100	110488370	110488448	911	3,1,1	0,0,0	2,0,2	0,0,1	419	149	1	1	1.0,1.0,1.0	1.0,NA,0.416	0.292		1012	ENSMUSG00000055296.15
710	ENSMUSG00000031161.16	Hdac6	chrX	-	7803542	7803711	7803180	7803314	7803865	7803994	710	118120165	1,0,0	148156177	0,0,0	318	149	1	1	0.982,1.0,1.0	1.0,1.0,1.0	-0.006		915	ENSMUSG00000033434.16	Gtpbp6	chr5	-	110252133	110252524	110252133	110252286	110252375	110252524	915	6,7,5	2,3,5	8,8,10	1,8,7	238	149	0.930078	1	0.653,0.594,0.385	0.834,0.385,0.472	-0.02		998	ENSMUSG00000038425.19
711	ENSMUSG00000031158.12	Timm17b	chrX	+	7767199	7767299	7765595	7765708	7769911	7769975	711	35,48,60	1,0,0	36,30,46	0,1,1	249	149	1	1	0.954,1.0,1.0	1.0,0.947,0.965	0.014		922	ENSMUSG00000029267.18	Mtf2	chr5	+	108228690	108228889	108228690	108228707	108228787	108228889	922	59,51,74	2,3,3	70,66,74	2,2,4	229	149	0.832077	1	0.95,0.917,0.941	0.958,0.955,0.923	-0.009		881	ENSMUSG00000025969.16
712	ENSMUSG00000031157.11	Pqbp1	chrX	-	7761403	7761467	7760757	7761106	7761842	7762121	712	68,45,114	0,0,0	44,78,80	0,1,3	213	149	0.432311	1	1.0,1.0,1.0	1.0,0.982,0.949	0.023		933	ENSMUSG00000029326.14	Enoph1	chr5	+	100215657	100216619	100215657	100215800	100216154	100216619	933	72,83,99	0,1,1	79,94,96	2,0,6	503	149	1	1	1.0,0.961,0.967	0.921,1.0,0.826	0.06		675	ENSMUSG00000040687.17
713	ENSMUSG00000031154.16	Otud5	chrX	+	7739792	7739994	7738234	7738438	7740471	7741524	713	42,44,87	1,1,0	66,79,88	0,0,0	351	149	1	1	0.947,0.949,1.0	1.0,1.0,1.0	-0.035		934	ENSMUSG00000030782.18	Tgfb1i1	chr7	+	127847189	127847644	127847189	127847464	127847591	127847644	934	0,0,0	0,2,3	2,0,0	3,0,3	276	149	1	1	NA,0.0,0.0	0.265,NA,0.0	-0.133		838	ENSMUSG00000028394.10
714	ENSMUSG00000031154.16	Otud5	chrX	+	7740078	7740192	7739792	7739994	7740471	7741524	714	22,16,26	0,1,0	28,33,31	1,0,0	263	149	1	1	1.0,0.901,1.0	0.941,1.0,1.0	-0.013		937	ENSMUSG00000030782.18	Tgfb1i1	chr7	+	127847749	127848146	127847749	127847892	127848058	127848146	937	1,1,0	8,2,7	1,0,2	12,6,8	315	149	0.650836	1	0.056,0.191,0.0	0.038,0.0,0.106	0.034		1808	ENSMUSG00000027547.18
715	ENSMUSG00000031153.17	Gripap1	chrX	+	7660498	7660525	7658514	7658576	7661230	7661338	715	6,2,8	1,0,1	3,2,4	0,0,0	176	149	1	1	0.836,1.0,0.871	1.0,1.0,1.0	-0.098		938	ENSMUSG00000030782.18	Tgfb1i1	chr7	+	127848058	127848367	127848058	127848146	127848261	127848367	938	0,4,0	15,5,7	1,2,0	21,9,16	264	149	0.820334	1	0.0,0.311,0.0	0.026,0.111,0.0	0.058		3014	ENSMUSG00000069631.15
716	ENSMUSG00000031153.17	Gripap1	chrX	+	7661230	7661338	7658514	7658576	7665528	7665667	716	5,2,5	0,0,1	6,4,7	2,1,0	257	149	0.65874	1	1.0,1.0,0.744	0.635,0.699,1.0	0.137		943	ENSMUSG00000042726.15	Trafd1	chr5	-	121511200	121512130	121511200	121511537	121512009	121512130	943	12,7,7	9,6,13	7,8,6	7,6,7	621	149	0.852083	1	0.242,0.219,0.114	0.194,0.242,0.171	-0.011		1538	ENSMUSG00000022263.11
717	ENSMUSG00000031153.17	Gripap1	chrX	+	7666774	7666822	7666395	7666580	7667415	7667447	717	3,1,0	0,0,0	5,3,2	0,0,1	197	149	1	1	1.0,1.0,NA	1.0,1.0,0.602	0.133		945	ENSMUSG00000029385.15	Ccng2	chr5	+	93418652	93419138	93418652	93418903	93419059	93419138	945	9,7,7	19,6,4	16,19,9	10,16,16	305	149	0.593005	1	0.188,0.363,0.461	0.439,0.367,0.216	-0.003		3151	ENSMUSG00000031734.14
718	ENSMUSG00000031153.17	Gripap1	chrX	+	7669832	7669925	7669561	7669639	7670598	7670733	718	0,3,0	17,9,3	0,0,0	8,17,15	242	149	0.759285	1	0.0,0.17,0.0	0.0,0.0,0.0	0.057		946	ENSMUSG00000046711.17	Hmga1	chr17	+	27775641	27776040	27775641	27775723	27775925	27776040	946	72,65,105	2,2,0	68,73,79	6,0,0	351	149	0.835609	1	0.939,0.932,1.0	0.828,1.0,1.0	0.014		796	ENSMUSG00000013736.17
719	ENSMUSG00000031153.17	Gripap1	chrX	+	7676131	7676227	7670598	7670733	7676491	7676704	719	10,16,12	0,1,0	27,15,23	1,0,0	245	149	1	1	1.0,0.907,1.0	0.943,1.0,1.0	-0.012		948	ENSMUSG00000029502.15	Golga3	chr5	+	110329468	110332473	110329468	110329779	110332203	110332473	948	8,12,4	4,6,9	9,10,7	9,3,5	2573	149	0.669433	1	0.104,0.104,0.025	0.055,0.162,0.075	-0.02		820	ENSMUSG00000020697.17
720	ENSMUSG00000031153.17	Gripap1	chrX	+	7685405	7685560	7684534	7684628	7686240	7686802	720	10,8,12	0,0,0	24,10,20	0,0,1	304	149	1	1	1.0,1.0,1.0	1.0,1.0,0.907	0.031		949	ENSMUSG00000004815.13	Dgkq	chr5	-	108797452	108797791	108797452	108797599	108797690	108797791	949	4,1,0	1,0,2	5,1,0	0,0,0	240	149	1	1	0.713,1.0,0.0	1.0,1.0,NA	-0.429		824	ENSMUSG00000005672.13
721	ENSMUSG00000031150.14	Ccdc120	chrX	-	7601310	7601409	7597952	7600337	7601539	7601714	721	7,3,5	0,0,0	6,5,5	0,1,0	248	149	1	1	1.0,1.0,1.0	1.0,0.75,1.0	0.083		952	ENSMUSG00000004815.13	Dgkq	chr5	-	108803155	108803459	108803155	108803230	108803305	108803459	952	0,1,0	2,1,4	2,0,1	1,1,3	224	149	0.659832	1	0.0,0.399,0.0	0.571,0.0,0.181	-0.118		3138	ENSMUSG00000021288.20
722	ENSMUSG00000031150.14	Ccdc120	chrX	-	7606587	7606644	7604608	7604762	7607450	7607547	722	1,0,1	0,1,0	2,1,2	0,0,1	206	149	1	1	1.0,0.0,1.0	1.0,1.0,0.591	-0.197		955	ENSMUSG00000029291.12	Rufy3	chr5	+	88762799	88764438	88762799	88762973	88764320	88764438	955	6,8,8	12,10,18	8,3,9	9,15,17	1496	149	0.738108	1	0.047,0.074,0.042	0.081,0.02,0.05	0.004		1643	ENSMUSG00000004364.15
723	ENSMUSG00000031150.14	Ccdc120	chrX	-	7606587	7606644	7604608	7604762	7616836	7617136	723	1,1,1	2,4,8	2,1,2	5,13,9	206	149	0.412533	1	0.266,0.153,0.083	0.224,0.053,0.138	0.029		959	ENSMUSG00000027134.5	Lpcat4	chr2	+	112072820	112073106	112072820	112072933	112073045	112073106	959	1,5,1	9,2,4	1,3,2	5,14,10	261	149	0.577223	1	0.06,0.588,0.125	0.102,0.109,0.102	0.153		1832	ENSMUSG00000006423.16
724	ENSMUSG00000031150.14	Ccdc120	chrX	-	7606587	7606648	7604600	7604762	7607450	7607563	724	1,0,1	0,1,0	2,1,2	0,0,1	210	149	1	1	1.0,0.0,1.0	1.0,1.0,0.587	-0.196		966	ENSMUSG00000029246.15	Ppat	chr5	-	77067217	77067754	77067217	77067345	77067602	77067754	966	0,2,7	34,27,49	2,1,6	38,32,48	406	149	0.933679	1	0.0,0.026,0.05	0.019,0.011,0.044	0.001		1156	ENSMUSG00000022338.9
725	ENSMUSG00000031150.14	Ccdc120	chrX	-	7606587	7606648	7604600	7604762	7616836	7617144	725	1,1,1	2,4,8	2,1,2	5,13,9	210	149	0.413004	1	0.262,0.151,0.081	0.221,0.052,0.136	0.028		968	ENSMUSG00000027002.14	Nckap1	chr2	-	80383480	80383793	80383480	80383571	80383650	80383793	968	2,13,1	18,25,23	6,7,4	21,19,35	228	149	0.89008	1	0.068,0.254,0.028	0.157,0.194,0.069	-0.023		247	ENSMUSG00000095253.5
728	ENSMUSG00000039382.13	Wdr45	chrX	+	7589553	7589992	7588593	7588617	7590087	7590159	728	2,1,9	1,3,2	5,2,1	1,3,3	588	149	0.507015	1	0.336,0.078,0.533	0.559,0.145,0.078	0.055		970	ENSMUSG00000063511.12	Snrnp70	chr7	-	45030140	45032608	45030140	45030242	45032548	45032608	970	296295251	0,3,0	263293178	1,0,0	2455	149	0.790427	1	1.0,0.856,1.0	0.941,1.0,1.0	-0.028		2559	ENSMUSG00000040124.6
729	ENSMUSG00000039382.13	Wdr45	chrX	+	7589803	7589992	7588488	7588617	7590087	7590159	729	2,0,8	1,3,2	2,2,0	1,3,3	338	149	0.159205	1	0.469,0.0,0.638	0.469,0.227,0.0	0.137		971	ENSMUSG00000034789.9	Rab24	chr13	-	55468315	55468657	55468315	55468366	55468557	55468657	971	13,19,18	7,4,16	20,24,24	10,9,17	340	149	0.929606	1	0.449,0.675,0.33	0.467,0.539,0.382	0.022		1848	ENSMUSG00000027381.17
744	ENSMUSG00000031148.15	Gpkow	chrX	+	7564994	7565119	7564731	7564892	7568301	7568411	744	21,15,20	1,0,0	24,18,25	0,0,0	274	149	1	1	0.919,1.0,1.0	1.0,1.0,1.0	-0.027		974	ENSMUSG00000029283.18	Cdc7	chr5	+	107122466	107123526	107122466	107122562	107123350	107123526	974	55,53,48	11,11,26	63,64,46	18,8,34	937	149	0.883494	1	0.443,0.434,0.227	0.358,0.56,0.177	0.003		1624	ENSMUSG00000029587.17
745	ENSMUSG00000031148.15	Gpkow	chrX	+	7568301	7568411	7564994	7565119	7569608	7569822	745	23,19,43	0,1,0	22,22,21	0,0,0	259	149	1	1	1.0,0.916,1.0	1.0,1.0,1.0	-0.028		975	ENSMUSG00000039318.13	Rab3gap2	chr1	+	184999097	184999476	184999097	184999211	184999369	184999476	975	5,3,3	1,3,3	1,9,0	1,0,2	307	149	0.843871	1	0.708,0.327,0.327	0.327,1.0,0.0	0.012		153	ENSMUSG00000025885.19
746	ENSMUSG00000031143.5	Ccdc22	chrX	-	7463776	7463971	7462969	7463032	7465396	7465575	746	32,11,32	0,0,0	18,24,15	1,0,0	344	149	1	1	1.0,1.0,1.0	0.886,1.0,1.0	0.038		976	ENSMUSG00000039318.13	Rab3gap2	chr1	+	184999097	184999476	184999097	184999271	184999369	184999476	976	0,1,2	2,2,2	0,1,0	5,1,3	247	149	0.661269	1	0.0,0.232,0.376	0.0,0.376,0.0	0.077		2722	ENSMUSG00000032525.16
747	ENSMUSG00000031143.5	Ccdc22	chrX	-	7465867	7465974	7465672	7465739	7466859	7466992	747	11,3,11	0,0,0	12,6,10	3,0,0	256	149	0.552827	1	1.0,1.0,1.0	0.7,1.0,1.0	0.1		977	ENSMUSG00000039318.13	Rab3gap2	chr1	+	185008108	185009418	185008108	185008144	185009343	185009418	977	11,20,14	11,5,8	25,27,12	7,10,13	1348	149	0.706214	1	0.1,0.307,0.162	0.283,0.23,0.093	-0.012		2521	ENSMUSG00000038733.15
754	ENSMUSG00000004317.15	Clcn5	chrX	-	7050029	7050129	7044539	7044727	7052422	7052574	754	20,7,29	2,0,0	34,18,21	0,0,0	249	149	1	1	0.857,1.0,1.0	1.0,1.0,1.0	-0.048		979	ENSMUSG00000028644.18	Ermap	chr4	-	119040039	119040535	119040039	119040072	119040502	119040535	979	3,3,2	0,0,2	0,2,1	0,0,0	579	149	1	1	1.0,1.0,0.205	NA,1.0,1.0	-0.265		1166	ENSMUSG00000030083.12
755	ENSMUSG00000004317.15	Clcn5	chrX	-	7184622	7184727	7182897	7183062	7185344	7185409	755	2,1,6	2,4,3	2,2,1	2,3,2	254	149	0.625843	1	0.37,0.128,0.54	0.37,0.281,0.227	0.053		982	ENSMUSG00000092060.5	Bend4	chr5	-	67549490	67557644	67549490	67555793	67557474	67557644	982	27,19,16	7,13,13	25,28,29	8,11,20	1830	149	0.658314	1	0.239,0.106,0.091	0.203,0.172,0.106	-0.015		583	ENSMUSG00000056952.14
758	ENSMUSG00000062393.15	Dgkk	chrX	+	6741463	6741544	6739724	6739835	6743415	6743520	758	1,1,4	0,0,0	3,0,4	0,1,0	230	149	1	1	1.0,1.0,1.0	1.0,0.0,1.0	0.333		984	ENSMUSG00000037720.17	Tmem33	chr5	+	67443438	67448804	67443438	67443559	67444352	67448804	984	127103213	3,2,4	104121142	3,2,3	942	149	0.973752	1	0.87,0.891,0.894	0.846,0.905,0.882	0.007		2058	ENSMUSG00000025980.15
760	ENSMUSG00000063698.10	Sfxn4	chr19	-	60845370	60845565	60844264	60844290	60845647	60845702	760	0,0,0	0,1,2	2,0,0	0,0,0	344	149	1	1	NA,0.0,0.0	1.0,NA,NA	-1		989	ENSMUSG00000051768.10	Xrcc1	chr7	+	24266282	24266569	24266282	24266392	24266463	24266569	989	5,3,4	54,27,53	3,9,2	55,67,79	220	149	0.70876	1	0.059,0.07,0.049	0.036,0.083,0.017	0.014		2203	ENSMUSG00000097767.9
761	ENSMUSG00000024991.9	Eif3a	chr19	-	60764188	60764293	60763730	60763829	60765063	60765235	761	208188310	0,0,0	312266327	1,0,0	254	149	1	1	1.0,1.0,1.0	0.995,1.0,1.0	0.002		1001	ENSMUSG00000029433.17	Diablo	chr5	-	123655799	123656128	123655799	123655896	123656017	123656128	1001	6,5,1	6,8,18	1,4,4	6,7,10	270	149	0.833697	1	0.356,0.256,0.03	0.084,0.24,0.181	0.046		2610	ENSMUSG00000034211.15
764	ENSMUSG00000033417.17	Cacul1	chr19	-	60533883	60533979	60531447	60531550	60551599	60551702	764	85,81,128	0,0,1	68,96,117	0,0,0	245	149	1	1	1.0,1.0,0.987	1.0,1.0,1.0	-0.004		1003	ENSMUSG00000020697.17	Lig3	chr11	+	82686190	82686612	82686190	82686278	82686534	82686612	1003	7,10,6	8,2,4	9,14,7	5,5,9	405	149	0.907224	1	0.244,0.648,0.356	0.398,0.507,0.222	0.04		2685	ENSMUSG00000041528.16
765	ENSMUSG00000057858.9	Fam204a	chr19	-	60208921	60209009	60208761	60208792	60209485	60209736	765	12,14,14	0,1,4	7,4,16	1,0,6	237	149	0.364037	1	1.0,0.898,0.688	0.815,1.0,0.626	0.048		1004	ENSMUSG00000020697.17	Lig3	chr11	+	82692106	82695100	82692106	82692248	82694824	82695100	1004	299249371	0,0,0	324308344	0,0,1	2725	149	1	1	1.0,1.0,1.0	1.0,1.0,0.95	0.017		2428	ENSMUSG00000031634.14
766	ENSMUSG00000057858.9	Fam204a	chr19	-	60209485	60209736	60208761	60208792	60214741	60215101	766	15,20,10	0,0,1	21,27,28	0,0,0	400	149	1	1	1.0,1.0,0.788	1.0,1.0,1.0	-0.071		1005	ENSMUSG00000022833.8	Ccdc14	chr16	+	34525530	34527267	34525530	34525625	34526756	34527267	1005	22,22,23	1,4,3	36,25,23	8,1,3	1280	149	0.867269	1	0.719,0.39,0.472	0.344,0.744,0.472	0.007		2457	ENSMUSG00000058301.9
767	ENSMUSG00000057858.9	Fam204a	chr19	-	60209485	60209736	60208921	60209009	60214663	60215109	767	32,38,20	0,0,0	27,25,34	0,1,0	400	149	1	1	1.0,1.0,1.0	1.0,0.903,1.0	0.032		1007	ENSMUSG00000024871.12	Doc2g	chr19	+	4054322	4054648	4054322	4054432	4054512	4054648	1007	1,1,0	5,6,10	2,3,2	4,1,4	229	149	1	1	0.115,0.098,0.0	0.245,0.661,0.245	-0.313		3085	ENSMUSG00000021027.18
768	ENSMUSG00000057858.9	Fam204a	chr19	-	60213296	60213331	60209485	60209736	60214663	60215129	768	1,2,0	8,9,2	0,0,0	11,5,5	184	149	0.536883	1	0.092,0.153,0.0	0.0,0.0,0.0	0.082		1011	ENSMUSG00000005299.7	Letm1	chr5	-	33902359	33903718	33902359	33902547	33903583	33903718	1011	14,7,13	27,21,23	7,11,11	13,21,23	1185	149	0.913132	1	0.061,0.04,0.066	0.063,0.062,0.057	-0.005		1314	ENSMUSG00000029022.19
771	ENSMUSG00000053117.12	E330013P04Rik	chr19	+	60144885	60144951	60141141	60141276	60148539	60148705	771	0,2,0	2,0,1	1,2,0	3,0,2	215	149	0.765567	1	0.0,1.0,0.0	0.188,1.0,0.0	-0.063		1012	ENSMUSG00000042502.11	Cd2bp2	chr7	-	126794194	126794633	126794194	126794330	126794532	126794633	1012	3,5,7	62,53,49	5,7,5	37,62,78	351	149	0.842907	1	0.02,0.039,0.057	0.054,0.046,0.026	-0.003		552	ENSMUSG00000004846.11
772	ENSMUSG00000043969.5	Emx2	chr19	+	59450093	59450278	59446803	59448056	59452311	59453789	772	53,29,85	0,2,0	37,49,45	0,0,0	334	149	1	1	1.0,0.866,1.0	1.0,1.0,1.0	-0.045		1018	ENSMUSG00000038564.12	Ift172	chr5	-	31443106	31443461	31443106	31443172	31443421	31443461	1018	3,2,5	4,0,5	8,2,2	4,4,6	398	149	0.602076	1	0.219,1.0,0.272	0.428,0.158,0.111	0.265		1398	ENSMUSG00000026641.14
773	ENSMUSG00000074746.4	Pdzd8	chr19	-	59293589	59293752	59285609	59290140	59303689	59303792	773	20,17,42	0,0,0	15,14,33	0,2,0	312	149	1	1	1.0,1.0,1.0	1.0,0.77,1.0	0.077		1020	ENSMUSG00000029687.17	Ezh2	chr6	-	47517610	47519340	47517610	47517789	47519299	47519340	1020	109,116,92	18,12,44	93,122,88	17,25,35	1659	149	0.592644	1	0.352,0.465,0.158	0.329,0.305,0.184	0.052		949	ENSMUSG00000097451.12
774	ENSMUSG00000074746.4	Pdzd8	chr19	-	59316182	59316305	59303689	59303792	59333150	59334212	774	59,48,72	0,0,0	51,68,82	3,0,0	272	149	0.872519	1	1.0,1.0,1.0	0.903,1.0,1.0	0.032		1022	ENSMUSG00000029165.18	Agbl5	chr5	+	31051244	31051854	31051244	31051414	31051718	31051854	1022	11,6,15	8,6,12	9,9,8	12,10,4	453	149	0.59141	1	0.311,0.248,0.291	0.198,0.228,0.397	0.009		646	ENSMUSG00000033540.19
776	ENSMUSG00000025089.16	Gfra1	chr19	-	58381004	58381019	58288673	58289010	58440400	58440484	776	5,3,0	0,0,1	0,0,2	3,0,0	164	149	1	1	1.0,1.0,0.0	0.0,NA,1.0	0.167		1024	ENSMUSG00000038828.14	Tmem214	chr5	+	31030030	31030248	31030030	31030112	31030204	31030248	1024	0,0,1	0,0,0	1,4,0	0,0,1	241	149	1	1	NA,NA,1.0	1.0,1.0,0.0	0.333		1178	ENSMUSG00000034101.15
777	ENSMUSG00000054843.10	Atrnl1	chr19	+	57626883	57627012	57618657	57618771	57630851	57631060	777	24,20,26	0,1,0	27,45,24	1,0,0	278	149	1	1	1.0,0.915,1.0	0.935,1.0,1.0	-0.007		1027	ENSMUSG00000038828.14	Tmem214	chr5	+	31032194	31033230	31032194	31032312	31033133	31033230	1027	13,16,18	11,8,8	16,27,18	15,7,11	970	149	0.883994	1	0.154,0.235,0.257	0.141,0.372,0.201	-0.023		1888	ENSMUSG00000068882.14
779	ENSMUSG00000054843.10	Atrnl1	chr19	+	57673935	57674144	57670802	57670887	57675090	57675209	779	61,39,60	0,1,1	42,45,40	0,0,0	358	149	1	1	1.0,0.942,0.961	1.0,1.0,1.0	-0.032		1034	ENSMUSG00000028969.11	Cdk5	chr5	-	24627329	24627556	24627329	24627386	24627495	24627556	1034	7,12,9	22,13,17	7,21,11	35,22,19	258	149	0.920791	1	0.155,0.348,0.234	0.104,0.355,0.251	0.009		2576	ENSMUSG00000020831.19
780	ENSMUSG00000054843.10	Atrnl1	chr19	+	58030759	58030874	57924028	57924136	58119524	58121775	780	9,19,15	0,0,0	13,16,18	2,0,0	264	149	1	1	1.0,1.0,1.0	0.786,1.0,1.0	0.071		1041	ENSMUSG00000029068.17	Ccnl2	chr4	+	155902995	155904885	155902995	155903121	155904785	155904885	1041	199221238	0,0,1	319274215	0,2,0	1813	149	1	1	1.0,1.0,0.951	1.0,0.918,1.0	0.011		3114	ENSMUSG00000094724.9
784	ENSMUSG00000033478.6	Fam160b1	chr19	+	57356955	57357034	57349111	57349802	57359585	57359755	784	12,13,18	0,0,0	21,42,15	0,0,2	228	149	1	1	1.0,1.0,1.0	1.0,1.0,0.831	0.056		1047	ENSMUSG00000006585.4	Cdt1	chr8	+	123295825	123296214	123295825	123295984	123296062	123296214	1047	5,1,4	29,16,20	6,3,2	34,25,25	227	149	0.81955	1	0.102,0.039,0.116	0.104,0.073,0.05	0.01		3243	ENSMUSG00000021782.15
790	ENSMUSG00000025085.17	Ablim1	chr19	-	57056522	57056678	57052197	57052233	57068244	57068303	790	21,22,34	0,2,0	24,26,38	0,0,0	305	149	1	1	1.0,0.843,1.0	1.0,1.0,1.0	-0.052		1049	ENSMUSG00000030703.9	Gdpd3	chr7	+	126370159	126370385	126370159	126370219	126370333	126370385	1049	0,0,2	0,1,2	0,0,2	0,3,0	263	149	1	1	NA,0.0,0.362	NA,0.0,1.0	-0.319		3086	ENSMUSG00000035597.20
796	ENSMUSG00000025078.10	Nhlrc2	chr19	+	56577725	56577852	56576601	56576701	56580007	56580076	796	0,0,0	15,7,17	1,0,0	7,5,7	276	149	1	1	0.0,0.0,0.0	0.072,0.0,0.0	-0.024		1050	ENSMUSG00000041329.14	Atp1b2	chr11	-	69492350	69493307	69492350	69492449	69493250	69493307	1050	1,3,0	3,1,2	2,0,0	3,0,0	950	149	1	1	0.05,0.32,0.0	0.095,NA,NA	0.028		1658	ENSMUSG00000024985.21
798	ENSMUSG00000025077.15	Dclre1a	chr19	-	56526728	56526874	56525559	56525714	56528613	56528754	798	9,10,15	2,0,0	15,17,12	0,0,1	295	149	1	1	0.694,1.0,1.0	1.0,1.0,0.858	-0.055		1051	ENSMUSG00000041329.14	Atp1b2	chr11	-	69493250	69493731	69493250	69493307	69493525	69493731	1051	0,2,2	0,3,0	0,0,0	5,3,2	367	149	1	1	NA,0.213,1.0	0.0,0.0,0.0	0.607		1714	ENSMUSG00000027333.19
799	ENSMUSG00000024983.11	Vti1a	chr19	+	55375620	55375641	55369373	55369451	55380215	55380300	799	1,0,0	10,12,20	0,0,0	16,17,19	170	149	1	1	0.081,0.0,0.0	0.0,0.0,0.0	0.027		1054	ENSMUSG00000035086.14	Becn1	chr11	-	101180608	101181325	101180608	101180751	101181264	101181325	1054	15,3,3	13,15,20	8,1,8	13,10,7	662	149	0.635451	1	0.206,0.043,0.033	0.122,0.022,0.205	-0.022		1517	ENSMUSG00000030330.16
800	ENSMUSG00000024983.11	Vti1a	chr19	+	55380215	55380300	55369373	55369451	55419664	55419726	800	5,5,8	1,0,0	3,4,6	0,0,0	234	149	1	1	0.761,1.0,1.0	1.0,1.0,1.0	-0.08		1056	ENSMUSG00000035086.14	Becn1	chr11	-	101184826	101185990	101184826	101184973	101185795	101185990	1056	20,21,13	11,6,8	16,8,13	3,8,4	971	149	0.868262	1	0.218,0.349,0.2	0.45,0.133,0.333	-0.05		474	ENSMUSG00000039458.16
801	ENSMUSG00000024983.11	Vti1a	chr19	+	55380215	55380300	55369373	55369451	55434609	55435411	801	6,7,10	0,1,0	6,4,6	0,0,0	234	149	1	1	1.0,0.817,1.0	1.0,1.0,1.0	-0.061		1059	ENSMUSG00000035086.14	Becn1	chr11	-	101186359	101187142	101186359	101186450	101187083	101187142	1059	9,12,18	19,15,5	20,10,27	11,25,17	782	149	0.897208	1	0.083,0.132,0.407	0.257,0.071,0.232	0.021		2706	ENSMUSG00000032498.10
806	ENSMUSG00000024976.15	Shoc2	chr19	+	53938249	53938374	53933315	53933444	53975884	53976073	806	0,2,2	12,13,13	3,0,1	1,8,5	274	149	0.505501	1	0.0,0.077,0.077	0.62,0.0,0.098	-0.188		1063	ENSMUSG00000000600.16	Krit1	chr5	+	3872086	3873785	3872086	3872243	3873633	3873785	1063	32,21,26	9,7,9	19,28,24	8,7,12	1539	149	0.583132	1	0.256,0.225,0.219	0.187,0.279,0.162	0.024		181	ENSMUSG00000024273.9
807	ENSMUSG00000024976.15	Shoc2	chr19	+	53975884	53976814	53933310	53933444	53991439	53991577	807	228181292	1,0,0	239256253	0,0,0	1079	149	1	1	0.969,1.0,1.0	1.0,1.0,1.0	-0.01		1065	ENSMUSG00000058503.12	Fam133b	chr5	+	3608660	3609159	3608660	3608693	3609137	3609159	1065	28,25,16	1,2,0	20,15,13	2,0,0	593	149	0.832355	1	0.876,0.759,1.0	0.715,1.0,1.0	-0.027		2611	ENSMUSG00000034211.15
809	ENSMUSG00000024976.15	Shoc2	chr19	+	54005979	54006110	53991439	53991577	54014780	54014969	809	70,49,89	0,0,0	62,66,97	1,0,0	280	149	1	1	1.0,1.0,1.0	0.971,1.0,1.0	0.01		1066	ENSMUSG00000078485.5	Plekhn1	chr4	-	156309982	156312773	156309982	156310129	156312673	156312773	1066	37,35,37	0,0,0	26,30,31	0,1,0	2693	149	1	1	1.0,1.0,1.0	1.0,0.624,1.0	0.125		454	ENSMUSG00000022570.8
811	ENSMUSG00000084957.4	Bbip1	chr19	-	53921921	53922001	53920560	53920636	53931896	53932010	811	0,1,0	9,8,11	0,0,0	6,21,31	229	149	1	1	0.0,0.075,0.0	0.0,0.0,0.0	0.025		1070	ENSMUSG00000059939.14	9430015G10Rik	chr4	+	156206389	156206873	156206389	156206485	156206807	156206873	1070	36,28,29	3,6,15	47,29,34	17,1,6	471	149	0.576136	1	0.792,0.596,0.38	0.467,0.902,0.642	-0.081		744	ENSMUSG00000061411.13
812	ENSMUSG00000084957.4	Bbip1	chr19	-	53927788	53927945	53920560	53920636	53931896	53932010	812	2,0,1	9,8,11	3,1,0	6,21,31	306	149	0.261955	1	0.098,0.0,0.042	0.196,0.023,0.0	-0.026		1077	ENSMUSG00000028684.15	Urod	chr4	-	116848428	116848690	116848428	116848495	116848589	116848690	1077	2,1,5	33,25,21	2,2,4	17,30,42	243	149	0.795709	1	0.036,0.024,0.127	0.067,0.039,0.055	0.009		2447	ENSMUSG00000036180.16
816	ENSMUSG00000025024.8	Smndc1	chr19	-	53374803	53374987	53372884	53373027	53377733	53377853	816	1,2,4	36,28,44	3,1,3	20,34,38	333	149	0.825093	1	0.012,0.031,0.039	0.063,0.013,0.034	-0.009		1079	ENSMUSG00000029033.17	Acap3	chr4	+	155987767	155988315	155987767	155987924	155988207	155988315	1079	2,3,6	1,0,0	0,1,1	0,0,0	432	149	1	1	0.408,1.0,1.0	NA,1.0,1.0	-0.197		1199	ENSMUSG00000038346.19
817	ENSMUSG00000025025.15	Mxi1	chr19	+	53334881	53334911	53319781	53319914	53357972	53358087	817	26,22,28	1,0,0	55,50,45	1,1,1	179	149	1	1	0.956,1.0,1.0	0.979,0.977,0.974	0.009		1086	ENSMUSG00000060073.10	Psma3	chr12	+	71031266	71031519	71031266	71031368	71031445	71031519	1086	8,3,11	110,98,135	11,9,10	102153173	226	149	0.671517	1	0.046,0.02,0.051	0.066,0.037,0.037	-0.008		2357	ENSMUSG00000040563.14
818	ENSMUSG00000025027.19	Xpnpep1	chr19	-	52990904	52990982	52988819	52988891	52991109	52991168	818	44,46,63	0,0,1	60,57,78	1,0,0	227	149	1	1	1.0,1.0,0.976	0.975,1.0,1.0	0		1089	ENSMUSG00000021701.9	Plk2	chr13	+	110534906	110535342	110534906	110535004	110535212	110535342	1089	3,2,0	14,9,20	3,2,3	29,24,34	357	149	0.875088	1	0.082,0.085,0.0	0.041,0.034,0.036	0.019		1191	ENSMUSG00000037628.11
820	ENSMUSG00000025027.19	Xpnpep1	chr19	-	53020439	53020528	53013689	53013814	53026944	53026984	820	42,34,44	25,19,15	59,35,55	16,18,20	238	149	0.276058	1	0.513,0.528,0.647	0.698,0.549,0.633	-0.064		1090	ENSMUSG00000029032.13	Arhgef16	chr4	-	154366462	154367102	154366462	154366537	154366972	154367102	1090	0,4,2	0,0,2	2,0,0	0,0,2	584	149	1	1	NA,1.0,0.203	1.0,NA,0.0	0.102		740	ENSMUSG00000003402.15
822	ENSMUSG00000025060.16	Slk	chr19	+	47600013	47600062	47597343	47597508	47600340	47600490	822	33,31,33	0,0,2	37,40,46	0,2,0	198	149	1	1	1.0,1.0,0.925	1.0,0.938,1.0	-0.004		1091	ENSMUSG00000029032.13	Arhgef16	chr4	-	154366972	154367369	154366972	154367102	154367216	154367369	1091	2,0,0	1,1,1	0,0,0	3,3,3	263	149	0.771416	1	0.531,0.0,0.0	0.0,0.0,0.0	0.177		432	ENSMUSG00000022382.16
823	ENSMUSG00000025060.16	Slk	chr19	+	47600013	47600062	47597343	47597508	47603634	47603707	823	2,5,10	0,0,1	3,3,2	0,0,0	198	149	1	1	1.0,1.0,0.883	1.0,1.0,1.0	-0.039		1098	ENSMUSG00000039768.17	Dnajc11	chr4	+	152062455	152064043	152062455	152062807	152063728	152064043	1098	25,7,9	0,0,0	31,25,10	0,1,0	1070	149	1	1	1.0,1.0,1.0	1.0,0.777,1.0	0.074		202	ENSMUSG00000024073.17
824	ENSMUSG00000025060.16	Slk	chr19	+	47600340	47600490	47597343	47597508	47603634	47603707	824	44,28,64	0,0,1	49,52,62	0,0,0	299	149	1	1	1.0,1.0,0.97	1.0,1.0,1.0	-0.01		1100	ENSMUSG00000041491.9	Cep78	chr19	-	15951719	15952316	15951719	15951831	15952251	15952316	1100	13,10,12	22,19,18	15,12,8	16,20,20	569	149	0.889447	1	0.134,0.121,0.149	0.197,0.136,0.095	-0.008		698	ENSMUSG00000024989.16
825	ENSMUSG00000025060.16	Slk	chr19	+	47600340	47600490	47600013	47600062	47603634	47603707	825	75,54,86	0,0,0	85,87,106	1,0,0	299	149	1	1	1.0,1.0,1.0	0.977,1.0,1.0	0.008		1101	ENSMUSG00000027245.12	Hypk	chr2	+	121288126	121288524	121288126	121288182	121288472	121288524	1101	23,12,9	262173299	26,13,10	220315341	439	149	0.80695	1	0.029,0.023,0.01	0.039,0.014,0.01	0		813	ENSMUSG00000028759.14
828	ENSMUSG00000071528.5	Atp5md	chr19	-	47073207	47073297	47071924	47072008	47074393	47074486	828	0,0,0	121134157	5,0,0	140145207	239	149	1	1	0.0,0.0,0.0	0.022,0.0,0.0	-0.007		1102	ENSMUSG00000001082.13	Mfsd10	chr5	-	34791934	34792306	34791934	34791988	34792194	34792306	1102	10,3,14	0,0,0	5,9,13	1,0,0	355	149	1	1	1.0,1.0,1.0	0.677,1.0,1.0	0.108		896	ENSMUSG00000002320.16
829	ENSMUSG00000047731.18	Wbp1l	chr19	+	46595150	46595198	46587552	46587732	46632791	46632894	829	13,6,12	4,7,26	1,2,10	8,6,12	197	149	0.118383	1	0.711,0.393,0.259	0.086,0.201,0.387	0.23		1104	ENSMUSG00000030894.6	Tpp1	chr7	-	105399386	105400936	105399386	105399537	105400796	105400936	1104	20,29,33	35,34,23	34,30,30	32,23,41	1408	149	0.653234	1	0.057,0.083,0.132	0.101,0.121,0.072	-0.007		1511	ENSMUSG00000042323.18
830	ENSMUSG00000047731.18	Wbp1l	chr19	+	46612748	46612972	46611839	46612018	46632791	46632894	830	0,1,1	2,0,2	0,1,0	4,2,3	373	149	1	1	0.0,1.0,0.166	0.0,0.166,0.0	0.333		1112	ENSMUSG00000031889.10	Phaf1	chr8	+	105965054	105966382	105965054	105965098	105966302	105966382	1112	24,21,15	8,19,26	25,23,12	18,15,25	1353	149	0.720342	1	0.248,0.109,0.06	0.133,0.144,0.05	0.03		2272	ENSMUSG00000033543.18
831	ENSMUSG00000025036.8	Sfxn2	chr19	+	46574143	46574242	46571245	46571416	46576373	46576449	831	2,6,8	1,0,0	5,6,13	0,0,1	248	149	1	1	0.546,1.0,1.0	1.0,1.0,0.886	-0.113		1117	ENSMUSG00000013155.11	Enkd1	chr8	-	106430744	106431146	106430744	106430881	106430982	106431146	1117	3,0,5	2,6,7	5,2,0	5,9,4	250	149	0.647558	1	0.472,0.0,0.299	0.373,0.117,0.0	0.094		2612	ENSMUSG00000034211.15
832	ENSMUSG00000025036.8	Sfxn2	chr19	+	46576662	46576748	46576373	46576449	46578579	46578640	832	1,0,1	0,1,0	0,0,1	0,0,0	235	149	1	1	1.0,0.0,1.0	NA,NA,1.0	-0.333		1118	ENSMUSG00000013155.11	Enkd1	chr8	-	106430982	106431392	106430982	106431146	106431266	106431392	1118	3,1,8	8,6,12	5,6,6	14,8,9	269	149	0.583699	1	0.172,0.085,0.27	0.165,0.293,0.27	-0.067		2882	ENSMUSG00000020290.15
834	ENSMUSG00000025036.8	Sfxn2	chr19	+	46580738	46580786	46579931	46579981	46583110	46583307	834	13,8,16	0,0,2	22,14,15	0,0,0	197	149	1	1	1.0,1.0,0.858	1.0,1.0,1.0	-0.047		1119	ENSMUSG00000013155.11	Enkd1	chr8	-	106431266	106433370	106431266	106431392	106433197	106433370	1119	10,21,25	25,13,16	24,25,22	34,16,22	1954	149	0.978643	1	0.03,0.11,0.106	0.051,0.106,0.071	0.006		2128	ENSMUSG00000022211.10
840	ENSMUSG00000025224.17	Gbf1	chr19	+	46242995	46243056	46242425	46242534	46244091	46244146	840	7,9,26	0,0,0	10,18,15	1,0,0	210	149	1	1	1.0,1.0,1.0	0.876,1.0,1.0	0.041		1121	ENSMUSG00000024220.15	Zfp523	chr17	+	28420234	28421322	28420234	28420414	28421074	28421322	1121	28,61,43	0,1,0	48,31,27	0,0,0	809	149	1	1	1.0,0.918,1.0	1.0,1.0,1.0	-0.027		1213	ENSMUSG00000026748.14
844	ENSMUSG00000025224.17	Gbf1	chr19	+	46273143	46273272	46272688	46272869	46274098	46274948	844	46,44,86	1,0,0	62,57,73	0,0,1	278	149	1	1	0.961,1.0,1.0	1.0,1.0,0.975	-0.005		1123	ENSMUSG00000027009.19	Itga4	chr2	+	79119165	79119735	79119165	79119211	79119580	79119735	1123	1,2,0	2,2,6	1,0,0	7,4,4	518	149	0.836029	1	0.126,0.223,0.0	0.039,0.0,0.0	0.103		1248	ENSMUSG00000091625.9
845	ENSMUSG00000039901.11	Armh3	chr19	-	45808712	45808829	45805802	45807417	45834546	45834625	845	7,12,18	0,0,0	11,17,16	0,2,0	266	149	1	1	1.0,1.0,1.0	1.0,0.826,1.0	0.058		1126	ENSMUSG00000024287.9	Thoc1	chr18	+	9959097	9959315	9959097	9959171	9959254	9959315	1126	13,16,10	25,33,65	10,22,19	27,62,52	232	149	0.723123	1	0.25,0.237,0.09	0.192,0.186,0.19	0.003		1486	ENSMUSG00002076083.1
846	ENSMUSG00000039901.11	Armh3	chr19	-	45910055	45910144	45880504	45880587	45920789	45920850	846	12,10,25	0,0,0	16,10,13	2,0,0	238	149	1	1	1.0,1.0,1.0	0.834,1.0,1.0	0.055		1128	ENSMUSG00000024287.9	Thoc1	chr18	+	9986288	9986761	9986288	9986355	9986690	9986761	1128	14,9,16	1,0,0	22,11,9	3,0,0	484	149	0.609703	1	0.812,1.0,1.0	0.693,1.0,1.0	0.04		2545	ENSMUSG00000025812.19
847	ENSMUSG00000039901.11	Armh3	chr19	-	45961261	45961369	45954680	45954773	45963405	45963552	847	6,7,5	0,1,0	7,7,2	0,0,0	257	149	1	1	1.0,0.802,1.0	1.0,1.0,1.0	-0.066		1141	ENSMUSG00000028821.9	Syf2	chr4	+	134661766	134662360	134661766	134661892	134662242	134662360	1141	5,2,4	18,6,16	1,2,9	16,25,23	499	149	0.620246	1	0.077,0.091,0.069	0.018,0.023,0.105	0.03		2871	ENSMUSG00000034175.14
852	ENSMUSG00000041035.10	DPCD	chr19	+	45549425	45549523	45549073	45549146	45553349	45553430	852	0,0,0	6,6,19	0,0,1	2,7,9	247	149	1	1	0.0,0.0,0.0	0.0,0.0,0.063	-0.021		1142	ENSMUSG00000028821.9	Syf2	chr4	+	134662242	134662775	134662242	134662360	134662684	134662775	1142	2,2,2	56,26,67	0,6,4	47,61,72	473	149	0.65311	1	0.011,0.024,0.009	0.0,0.03,0.017	-0.001		2322	ENSMUSG00000020265.17
853	ENSMUSG00000025217.16	Btrc	chr19	+	45394983	45395025	45352190	45352325	45411571	45411679	853	6,1,4	8,10,10	10,3,1	16,11,15	191	149	0.788349	1	0.369,0.072,0.238	0.328,0.175,0.049	0.042		1148	ENSMUSG00000020385.17	Clk4	chr11	+	51166238	51166691	51166238	51166405	51166596	51166691	1148	19,12,10	12,12,14	17,13,9	14,11,11	340	149	0.95035	1	0.41,0.305,0.238	0.347,0.341,0.264	0		3292	ENSMUSG00000021990.17
855	ENSMUSG00000025217.16	Btrc	chr19	+	45394983	45395025	45352525	45352713	45411571	45411679	855	3,0,2	0,0,2	6,3,1	4,1,1	191	149	1	1	1.0,NA,0.438	0.539,0.701,0.438	0.16		1151	ENSMUSG00000007880.17	Arid1a	chr4	-	133422882	133423467	133422882	133422972	133423226	133423467	1151	24,20,13	68,51,115	16,15,28	85,78,91	403	149	0.767036	1	0.115,0.127,0.04	0.065,0.066,0.102	0.016		2100	ENSMUSG00000034401.17
857	ENSMUSG00000025217.16	Btrc	chr19	+	45411571	45411679	45352189	45352325	45444971	45445049	857	14,15,12	1,1,6	21,16,27	2,2,2	257	149	0.434372	1	0.89,0.897,0.537	0.859,0.823,0.887	-0.082		1152	ENSMUSG00000022386.13	Trmu	chr15	+	85780560	85781118	85780560	85780705	85781035	85781118	1152	0,2,3	6,2,1	1,2,1	0,2,2	479	149	0.957101	1	0.0,0.237,0.483	1.0,0.237,0.135	-0.217		372	ENSMUSG00000022760.18
858	ENSMUSG00000025217.16	Btrc	chr19	+	45411571	45411679	45352189	45352325	45459453	45459543	858	6,7,5	0,0,1	6,3,5	0,0,0	257	149	1	1	1.0,1.0,0.744	1.0,1.0,1.0	-0.085		1153	ENSMUSG00000017754.14	Pltp	chr2	-	164694392	164694600	164694392	164694456	164694536	164694600	1153	1,0,1	5,6,8	1,0,3	11,10,11	229	149	1	1	0.115,0.0,0.075	0.056,0.0,0.151	-0.006		2190	ENSMUSG00000074129.15
860	ENSMUSG00000025217.16	Btrc	chr19	+	45411571	45411679	45352525	45352713	45444971	45445049	860	7,5,5	0,0,0	10,7,13	2,0,0	257	149	1	1	1.0,1.0,1.0	0.744,1.0,1.0	0.085		1156	ENSMUSG00000025747.13	Tyms	chr5	-	30274831	30276705	30274831	30274953	30276631	30276705	1156	75,66,46	1,0,0	70,115,78	0,0,0	1827	149	1	1	0.859,1.0,1.0	1.0,1.0,1.0	-0.047		1896	ENSMUSG00000040434.17
861	ENSMUSG00000025217.16	Btrc	chr19	+	45411571	45411679	45394983	45395025	45444971	45445049	861	10,6,5	0,1,6	16,10,13	1,0,1	257	149	1	1	1.0,0.777,0.326	0.903,1.0,0.883	-0.228		1159	ENSMUSG00000028898.16	Trnau1ap	chr4	-	132052518	132053356	132052518	132052571	132053256	132053356	1159	18,13,10	10,15,8	16,19,24	13,10,18	834	149	0.591456	1	0.243,0.134,0.183	0.18,0.253,0.192	-0.022		2908	ENSMUSG00000068329.13
862	ENSMUSG00000025217.16	Btrc	chr19	+	45444971	45445049	45352271	45352325	45459453	45459543	862	9,8,14	0,0,1	6,10,7	0,0,0	227	149	1	1	1.0,1.0,0.902	1.0,1.0,1.0	-0.033		1160	ENSMUSG00000025188.16	Hps1	chr19	-	42744696	42746345	42744696	42744779	42746231	42746345	1160	33,20,16	2,2,3	50,40,28	6,3,2	1601	149	0.788268	1	0.606,0.482,0.332	0.437,0.554,0.566	-0.046		810	ENSMUSG00000029464.11
864	ENSMUSG00000025217.16	Btrc	chr19	+	45444971	45445049	45411571	45411679	45459453	45459543	864	16,14,22	1,0,3	26,25,30	1,1,1	227	149	0.516914	1	0.913,1.0,0.828	0.945,0.943,0.952	-0.033		1163	ENSMUSG00000040479.13	Dgkz	chr2	-	91764087	91764434	91764087	91764187	91764400	91764434	1163	14,5,9	24,14,28	6,9,12	18,29,23	362	149	0.776382	1	0.194,0.128,0.117	0.121,0.113,0.177	0.009		836	ENSMUSG00000029687.17
866	ENSMUSG00000025217.16	Btrc	chr19	+	45459453	45459543	45444971	45445049	45491370	45491507	866	19,16,13	0,1,0	14,11,13	0,1,0	239	149	1	1	1.0,0.909,1.0	1.0,0.873,1.0	0.012		1170	ENSMUSG00000028845.16	Tekt2	chr4	-	126218022	126218512	126218022	126218228	126218386	126218512	1170	0,1,0	0,0,1	0,2,2	0,0,0	307	149	1	1	NA,1.0,0.0	NA,1.0,1.0	-0.5		2704	ENSMUSG00000002274.14
868	ENSMUSG00000035342.15	Lzts2	chr19	+	45009825	45010275	45006594	45006669	45013157	45013356	868	97,69,90	0,2,0	119,84,84	0,0,0	599	149	1	1	1.0,0.896,1.0	1.0,1.0,1.0	-0.035		1172	ENSMUSG00000069255.14	Dusp22	chr13	+	30892659	30895214	30892659	30892732	30894688	30895214	1172	55,33,68	5,6,0	87,75,72	1,2,9	2105	149	0.710138	1	0.438,0.28,1.0	0.86,0.726,0.362	-0.077		2814	ENSMUSG00000026605.15
869	ENSMUSG00000035342.15	Lzts2	chr19	+	45011980	45012643	45009825	45010275	45013157	45013309	869	124114147	0,2,0	123128126	0,0,0	812	149	1	1	1.0,0.913,1.0	1.0,1.0,1.0	-0.029		1174	ENSMUSG00000049659.16	Aftph	chr11	-	20646750	20648373	20646750	20646831	20648312	20648373	1174	29,16,16	2,0,1	25,15,17	1,0,0	1630	149	0.594018	1	0.57,1.0,0.594	0.696,1.0,1.0	-0.177		379	ENSMUSG00000068663.15
870	ENSMUSG00000036097.9	Slf2	chr19	+	44955405	44955508	44949172	44949314	44955941	44956118	870	40,52,52	0,0,3	47,47,39	2,0,1	252	149	1	1	1.0,1.0,0.911	0.933,1.0,0.958	0.007		1178	ENSMUSG00000028519.17	Dab1	chr4	+	104537266	104537579	104537266	104537305	104537387	104537579	1178	7,2,5	0,0,0	4,9,5	2,0,1	231	149	0.864708	1	1.0,1.0,1.0	0.563,1.0,0.763	0.225		3008	ENSMUSG00000032480.18
871	ENSMUSG00000036097.9	Slf2	chr19	+	44967599	44967668	44964067	44964154	44968994	44970814	871	49,50,65	0,2,1	37,64,51	1,2,1	218	149	1	1	1.0,0.945,0.978	0.962,0.956,0.972	0.011		1182	ENSMUSG00000033763.15	Mtss2	chr8	+	111464203	111464727	111464203	111464380	111464561	111464727	1182	1,4,1	27,45,43	2,2,1	41,32,30	330	149	0.846565	1	0.016,0.039,0.01	0.022,0.027,0.015	0		3226	ENSMUSG00000025451.16
876	ENSMUSG00000025200.8	Cwf19l1	chr19	-	44121894	44121991	44121438	44121523	44122784	44124064	876	0,2,0	0,0,0	0,0,0	0,0,1	246	149	1	1	NA,1.0,NA	NA,NA,0.0	1		1183	ENSMUSG00000033191.15	Tie1	chr4	-	118336058	118337100	118336058	118336349	118336809	118337100	1183	0,1,0	5,3,7	0,0,0	12,6,14	609	149	1	1	0.0,0.075,0.0	0.0,0.0,0.0	0.025		3208	ENSMUSG00000021576.7
877	ENSMUSG00000025199.17	Chuk	chr19	-	44063869	44063969	44061773	44062979	44066731	44066879	877	3,10,5	1,0,0	7,7,4	0,0,0	249	149	1	1	0.642,1.0,1.0	1.0,1.0,1.0	-0.119		1186	ENSMUSG00000028542.18	Slc6a9	chr4	+	117721601	117722085	117721601	117721839	117721950	117722085	1186	0,0,5	0,2,3	5,0,0	8,7,5	260	149	1	1	NA,0.0,0.489	0.264,0.0,0.0	0.156		77	ENSMUSG00000031010.18
878	ENSMUSG00000025199.17	Chuk	chr19	-	44065684	44065818	44063869	44063969	44066731	44066879	878	27,17,33	0,0,2	22,22,23	0,0,0	283	149	1	1	1.0,1.0,0.897	1.0,1.0,1.0	-0.034		1187	ENSMUSG00000029017.14	Pmpcb	chr5	+	21948376	21951088	21948376	21948456	21950975	21951088	1187	23,21,29	3,4,14	38,34,21	6,4,12	2668	149	0.690518	1	0.3,0.227,0.104	0.261,0.322,0.089	-0.014		1131	ENSMUSG00000055065.8
879	ENSMUSG00000025199.17	Chuk	chr19	-	44065701	44065818	44063869	44063969	44066731	44066879	879	25,18,35	0,0,2	20,21,19	0,0,0	266	149	1	1	1.0,1.0,0.907	1.0,1.0,1.0	-0.031		1189	ENSMUSG00000097451.12	Rian	chr12	+	109611695	109612719	109611695	109611765	109612280	109612719	1189	67,62,42	36,44,63	87,95,62	72,86,50	664	149	0.959736	1	0.295,0.24,0.13	0.213,0.199,0.218	0.012		919	ENSMUSG00000028797.21
880	ENSMUSG00000025199.17	Chuk	chr19	-	44075346	44075498	44072855	44072917	44076354	44076478	880	35,26,37	0,0,0	30,29,35	0,1,0	301	149	1	1	1.0,1.0,1.0	1.0,0.935,1.0	0.022		1192	ENSMUSG00000097451.12	Rian	chr12	+	109616505	109617533	109616505	109616589	109617446	109617533	1192	473363530	3,1,7	584528543	6,5,0	1006	149	0.708117	1	0.959,0.982,0.918	0.935,0.94,1.0	-0.005		1439	ENSMUSG00000020472.15
881	ENSMUSG00000025199.17	Chuk	chr19	-	44079371	44079566	44077113	44077216	44084662	44084798	881	54,50,54	0,0,2	50,41,48	0,0,0	344	149	1	1	1.0,1.0,0.921	1.0,1.0,1.0	-0.026		1195	ENSMUSG00000040370.14	Etfrf1	chr6	+	145160247	145160997	145160247	145160510	145160909	145160997	1195	3,6,13	1,0,0	7,5,7	0,0,1	548	149	1	1	0.449,1.0,1.0	1.0,1.0,0.656	-0.069		616	ENSMUSG00000032280.17
884	ENSMUSG00000040414.9	Slc25a28	chr19	-	43655353	43655582	43654210	43654267	43662914	43663320	884	19,17,43	1,0,2	29,32,30	0,0,0	378	149	0.465616	1	0.882,1.0,0.894	1.0,1.0,1.0	-0.075		1196	ENSMUSG00000043733.15	Ptpn11	chr5	-	121290537	121292589	121290537	121290617	121292492	121292589	1196	25,25,14	45,51,54	23,18,15	49,37,59	2024	149	0.671491	1	0.039,0.035,0.019	0.033,0.035,0.018	0.002		2332	ENSMUSG00000056153.16
885	ENSMUSG00000025190.14	Got1	chr19	-	43493214	43493365	43492960	43493126	43495360	43495465	885	14,24,29	0,0,1	32,23,27	0,0,0	300	149	1	1	1.0,1.0,0.935	1.0,1.0,1.0	-0.022		1200	ENSMUSG00000028687.18	Mutyh	chr4	+	116675084	116675479	116675084	116675234	116675437	116675479	1200	7,0,5	7,8,5	11,10,4	13,9,17	352	149	0.593586	1	0.297,0.0,0.297	0.264,0.32,0.091	-0.027		1150	ENSMUSG00000036281.14
886	ENSMUSG00000074852.5	Hpse2	chr19	-	43001483	43001657	42979548	42979720	43282641	43282803	886	1,0,1	0,0,1	1,5,0	0,0,0	323	149	1	1	1.0,NA,0.316	1.0,1.0,NA	-0.342		1201	ENSMUSG00000028693.16	Nasp	chr4	-	116461359	116462011	116461359	116461548	116461937	116462011	1201	18,25,13	147134265	13,20,25	124173217	538	149	0.734825	1	0.033,0.049,0.013	0.028,0.031,0.031	0.002		3076	ENSMUSG00000020659.17
889	ENSMUSG00000042401.9	Crtac1	chr19	-	42275611	42275654	42272561	42272705	42276291	42276437	889	7,6,1	3,1,0	9,9,3	0,2,1	192	149	0.311241	1	0.644,0.823,1.0	1.0,0.777,0.7	-0.003		1204	ENSMUSG00000026869.13	Psmd5	chr2	-	34755538	34756107	34755538	34755667	34755993	34756107	1204	8,8,11	30,21,39	5,14,6	30,30,18	475	149	0.8935	1	0.077,0.107,0.081	0.05,0.128,0.095	-0.003		1497	ENSMUSG00000020260.10
891	ENSMUSG00000018820.14	Zfyve27	chr19	+	42177635	42177682	42173773	42174388	42177960	42178042	891	16,18,18	0,0,2	28,31,15	0,0,0	196	149	1	1	1.0,1.0,0.872	1.0,1.0,1.0	-0.043		1208	ENSMUSG00000030406.8	Gipr	chr7	-	18894255	18894679	18894255	18894316	18894519	18894679	1208	0,2,0	0,0,1	1,1,0	0,0,0	352	149	1	1	NA,1.0,0.0	1.0,1.0,NA	-0.5		3032	ENSMUSG00000061028.8
893	ENSMUSG00000025178.10	Pi4k2a	chr19	+	42103475	42104457	42101481	42101543	42108231	42110464	893	20,20,18	1,2,0	12,29,10	0,0,0	1131	149	0.646928	1	0.725,0.568,1.0	1.0,1.0,1.0	-0.236		1214	ENSMUSG00000063800.6	Prpf38a	chr4	-	108425554	108427463	108425554	108425667	108427352	108427463	1214	15,15,32	68,80,104	28,29,16	78,95,144	1834	149	0.830361	1	0.018,0.015,0.024	0.028,0.024,0.009	-0.001		144	ENSMUSG00000024835.16
894	ENSMUSG00000025178.10	Pi4k2a	chr19	+	42104945	42105005	42103475	42104457	42108231	42108423	894	20,25,52	2,0,4	29,32,61	1,0,3	209	149	0.361142	1	0.877,1.0,0.903	0.954,1.0,0.935	-0.036		1217	ENSMUSG00000062908.13	Acadm	chr3	-	153644533	153644804	153644533	153644603	153644706	153644804	1217	4,5,6	31,26,41	9,3,6	43,35,35	252	149	0.897635	1	0.071,0.102,0.08	0.11,0.048,0.092	0.001		693	ENSMUSG00000029673.20
895	ENSMUSG00000025157.9	Zdhhc16	chr19	+	41923176	41923322	41921928	41922104	41926041	41926289	895	37,37,38	0,0,0	44,36,40	0,0,2	295	149	1	1	1.0,1.0,1.0	1.0,1.0,0.91	0.03		1221	ENSMUSG00000021149.9	Gtpbp4	chr13	-	9034801	9035355	9034801	9034923	9035244	9035355	1221	4,4,3	0,0,0	10,3,6	0,0,1	470	149	1	1	1.0,1.0,1.0	1.0,1.0,0.655	0.115		890	ENSMUSG00000024220.15
896	ENSMUSG00000025157.9	Zdhhc16	chr19	+	41923278	41923322	41921918	41922104	41926041	41926289	896	4,0,2	0,0,0	7,1,1	0,0,2	193	149	1	1	1.0,NA,1.0	1.0,1.0,0.279	0.24		1222	ENSMUSG00000028552.14	Eps15	chr4	+	109218359	109219064	109218359	109218521	109218866	109219064	1222	3,3,1	7,8,5	12,7,2	12,25,27	494	149	0.894987	1	0.114,0.102,0.057	0.232,0.078,0.022	-0.02		2485	ENSMUSG00000037022.4
899	ENSMUSG00000034321.15	Exosc1	chr19	-	41913149	41913234	41910730	41912527	41914970	41915004	899	25,21,62	0,0,0	29,29,39	0,0,3	234	149	0.843649	1	1.0,1.0,1.0	1.0,1.0,0.892	0.036		1224	ENSMUSG00000036202.17	Rif1	chr2	+	51983514	51984674	51983514	51983601	51984600	51984674	1224	37,42,40	32,24,45	57,41,38	35,26,60	1148	149	0.884595	1	0.13,0.185,0.103	0.174,0.17,0.076	-0.001		2712	ENSMUSG00000059540.16
900	ENSMUSG00000034321.15	Exosc1	chr19	-	41913149	41913234	41910730	41912527	41919794	41919869	900	22,20,61	0,0,0	30,29,38	0,0,2	234	149	1	1	1.0,1.0,1.0	1.0,1.0,0.924	0.025		1226	ENSMUSG00000030310.11	Slc6a1	chr6	+	114278823	114279592	114278823	114279148	114279460	114279592	1226	0,4,2	0,0,0	0,0,1	1,0,0	461	149	1	1	NA,1.0,1.0	0.0,NA,1.0	0.5		1684	ENSMUSG00000073468.13
901	ENSMUSG00000034321.15	Exosc1	chr19	-	41913627	41913678	41913149	41913234	41914970	41915004	901	30,31,54	3,1,1	27,67,50	0,0,1	200	149	0.196436	1	0.882,0.958,0.976	1.0,1.0,0.974	-0.053		1231	ENSMUSG00000020263.15	Appl2	chr10	-	83446841	83447063	83446841	83446930	83447006	83447063	1231	6,9,6	5,1,4	10,4,6	4,0,4	225	149	0.637824	1	0.443,0.856,0.498	0.623,1.0,0.498	-0.108		2383	ENSMUSG00000019470.13
902	ENSMUSG00000034321.15	Exosc1	chr19	-	41913627	41913678	41913149	41913234	41919794	41919869	902	18,17,30	0,0,0	19,33,33	1,0,0	200	149	1	1	1.0,1.0,1.0	0.934,1.0,1.0	0.022		1232	ENSMUSG00000022978.12	Mis18a	chr16	-	90516199	90517638	90516199	90516866	90517541	90517638	1232	15,3,2	20,19,42	11,15,5	44,37,48	824	149	0.815994	1	0.119,0.028,0.009	0.043,0.068,0.018	0.009		1707	ENSMUSG00000026942.14
903	ENSMUSG00000034321.15	Exosc1	chr19	-	41914970	41915004	41912004	41912527	41919794	41919869	903	0,1,2	0,0,0	1,0,3	0,0,2	183	149	1	1	NA,1.0,1.0	1.0,NA,0.55	0.225		1233	ENSMUSG00000022978.12	Mis18a	chr16	-	90523180	90524292	90523180	90523247	90523913	90524292	1233	16,6,3	21,9,19	4,3,12	10,15,14	815	149	0.830499	1	0.122,0.109,0.028	0.068,0.035,0.135	0.007		2177	ENSMUSG00000001100.11
904	ENSMUSG00000034321.15	Exosc1	chr19	-	41914970	41915004	41913149	41913234	41919794	41919869	904	1,1,3	0,0,0	1,0,1	1,0,0	183	149	1	1	1.0,1.0,1.0	0.449,NA,1.0	0.275		1234	ENSMUSG00000028399.19	Ptprd	chr4	-	76003697	76004836	76003697	76003795	76004248	76004836	1234	11,9,15	7,4,1	9,6,11	0,10,4	602	149	0.963487	1	0.28,0.358,0.788	1.0,0.129,0.405	-0.036		2459	ENSMUSG00000070003.8
905	ENSMUSG00000034321.15	Exosc1	chr19	-	41914970	41915004	41913627	41913678	41919794	41919869	905	0,6,2	0,1,2	1,3,3	0,2,3	183	149	1	1	NA,0.83,0.449	1.0,0.55,0.449	-0.027		1236	ENSMUSG00000014873.16	Surf2	chr2	+	26807439	26809067	26807439	26807543	26808884	26809067	1236	44,51,61	3,16,8	43,49,49	7,12,8	1490	149	0.651324	1	0.595,0.242,0.433	0.381,0.29,0.38	0.073		2551	ENSMUSG00000053110.14
906	ENSMUSG00000034321.15	Exosc1	chr19	-	41916463	41916552	41914970	41915004	41919794	41919869	906	51,42,92	0,2,2	53,96,96	1,2,1	238	149	0.843998	1	1.0,0.929,0.966	0.971,0.968,0.984	-0.009		1237	ENSMUSG00000014873.16	Surf2	chr2	+	26807439	26809067	26807439	26807543	26808940	26809067	1237	56,63,76	2,0,2	55,62,72	2,2,0	1546	149	0.969607	1	0.73,1.0,0.786	0.726,0.749,1.0	0.014		2660	ENSMUSG00000030649.19
907	ENSMUSG00000025154.16	Arhgap19	chr19	-	41761488	41761567	41755026	41758635	41762504	41762615	907	46,38,36	1,0,4	76,65,70	0,0,1	228	149	0.244493	1	0.968,1.0,0.855	1.0,1.0,0.979	-0.052		1245	ENSMUSG00000028392.16	Bspry	chr4	+	62414234	62415535	62414234	62414808	62415218	62415535	1245	9,4,7	2,0,0	7,8,8	1,0,0	559	149	0.848565	1	0.545,1.0,1.0	0.651,1.0,1.0	-0.035		1904	ENSMUSG00000085385.8
908	ENSMUSG00000025154.16	Arhgap19	chr19	-	41776744	41776825	41774996	41775206	41780185	41780451	908	30,18,27	0,0,2	24,28,32	0,1,0	230	149	1	1	1.0,1.0,0.897	1.0,0.948,1.0	-0.017		1246	ENSMUSG00000019929.17	Dcn	chr10	+	97345826	97349599	97345826	97345920	97349460	97349599	1246	3,2,0	0,2,0	0,4,0	0,0,0	3689	149	1	1	1.0,0.039,NA	NA,1.0,NA	-0.481		2643	ENSMUSG00000021143.11
910	ENSMUSG00000025019.18	Lcor	chr19	+	41534313	41534446	41471965	41472039	41540887	41541175	910	29,30,22	0,0,0	31,29,31	4,0,0	282	149	0.413552	1	1.0,1.0,1.0	0.804,1.0,1.0	0.065		1248	ENSMUSG00000000823.17	Zfp512b	chr2	-	181231165	181231974	181231165	181231752	181231845	181231974	1248	41,42,51	10,7,18	37,31,50	10,6,20	242	149	0.639249	1	0.716,0.787,0.636	0.695,0.761,0.606	0.026		362	ENSMUSG00000041215.17
911	ENSMUSG00000025019.18	Lcor	chr19	+	41534313	41534446	41471965	41472039	41570216	41574975	911	2,0,0	0,0,0	1,4,3	0,0,1	282	149	1	1	1.0,NA,NA	1.0,1.0,0.613	0.129		1253	ENSMUSG00000068206.14	Pick1	chr15	+	79131464	79132496	79131464	79131515	79132351	79132496	1253	22,17,13	4,2,3	24,28,25	8,6,3	985	149	0.638104	1	0.454,0.563,0.396	0.312,0.414,0.558	0.043		3025	ENSMUSG00000020770.14
913	ENSMUSG00000025019.18	Lcor	chr19	+	41534313	41534446	41516999	41517079	41570216	41574975	913	23,6,11	0,0,1	18,17,20	0,0,0	282	149	1	1	1.0,1.0,0.853	1.0,1.0,1.0	-0.049		1263	ENSMUSG00000026825.18	Dnm1	chr2	-	32198482	32200499	32198482	32199076	32200462	32200499	1263	67,57,49	0,0,0	117,70,73	1,0,0	1535	149	1	1	1.0,1.0,1.0	0.919,1.0,1.0	0.027		2154	ENSMUSG00000044465.20
914	ENSMUSG00000025019.18	Lcor	chr19	+	41540887	41541175	41471965	41472039	41544046	41544140	914	67,48,72	0,0,2	54,58,68	0,1,0	437	149	1	1	1.0,1.0,0.925	1.0,0.952,1.0	-0.009		1271	ENSMUSG00000016933.18	Plcg1	chr2	+	160602999	160603386	160602999	160603114	160603224	160603386	1271	1,4,1	17,19,13	5,2,0	26,22,39	259	149	0.761234	1	0.033,0.108,0.042	0.1,0.05,0.0	0.011		2510	ENSMUSG00000036550.17
915	ENSMUSG00000025019.18	Lcor	chr19	+	41540887	41541175	41516999	41517079	41544046	41544140	915	69,51,73	1,0,0	50,60,68	0,0,0	437	149	1	1	0.959,1.0,1.0	1.0,1.0,1.0	-0.014		1276	ENSMUSG00000028467.16	Gba2	chr4	-	43569488	43569955	43569488	43569661	43569829	43569955	1276	5,1,4	4,6,10	2,4,2	4,4,5	317	149	0.827967	1	0.37,0.073,0.158	0.19,0.32,0.158	-0.022		3221	ENSMUSG00000021716.15
916	ENSMUSG00000025019.18	Lcor	chr19	+	41544046	41544140	41471965	41472039	41570216	41574975	916	3,3,2	0,0,0	2,12,5	0,0,1	243	149	1	1	1.0,1.0,1.0	1.0,1.0,0.754	0.082		1287	ENSMUSG00000009092.6	Derl3	chr10	+	75729455	75729677	75729455	75729518	75729603	75729677	1287	2,4,0	2,0,0	0,0,3	5,2,0	234	149	1	1	0.389,1.0,NA	0.0,0.0,1.0	0.361		1376	ENSMUSG00000031885.15
917	ENSMUSG00000025019.18	Lcor	chr19	+	41544046	41544140	41516999	41517079	41570216	41574975	917	4,3,2	0,0,1	2,11,5	0,0,0	243	149	1	1	1.0,1.0,0.551	1.0,1.0,1.0	-0.15		1290	ENSMUSG00000036073.19	Galt	chr4	+	41756512	41756995	41756512	41756811	41756938	41756995	1290	1,1,4	12,2,7	1,1,3	9,4,4	276	149	0.851712	1	0.043,0.213,0.236	0.057,0.119,0.288	0.009		2349	ENSMUSG00000001034.18
924	ENSMUSG00000025008.16	Tctn3	chr19	-	40597645	40597776	40597345	40597454	40599737	40599856	924	11,9,12	0,0,0	16,23,8	0,0,1	280	149	1	1	1.0,1.0,1.0	1.0,1.0,0.81	0.063		1291	ENSMUSG00000036073.19	Galt	chr4	+	41758083	41758695	41758083	41758238	41758502	41758695	1291	0,1,1	7,13,12	1,2,2	12,16,16	413	149	0.590374	1	0.0,0.027,0.029	0.029,0.043,0.043	-0.02		1419	ENSMUSG00000020538.16
925	ENSMUSG00000025007.14	Aldh18a1	chr19	-	40568305	40568520	40566215	40566365	40576753	40576826	925	27,19,14	0,0,1	39,30,35	0,0,0	364	149	1	1	1.0,1.0,0.851	1.0,1.0,1.0	-0.05		1295	ENSMUSG00000041459.16	Tardbp	chr4	-	148696838	148703248	148696838	148702162	148703103	148703248	1295	7596611036	0,0,2	697859929	0,1,2	1090	149	1	1	1.0,1.0,0.986	1.0,0.992,0.984	0.003		1612	ENSMUSG00000002107.19
927	ENSMUSG00000025007.14	Aldh18a1	chr19	-	40574570	40574636	40573933	40574049	40576753	40576813	927	42,30,33	1,0,0	68,44,55	1,0,0	215	149	1	1	0.967,1.0,1.0	0.979,1.0,1.0	-0.004		1296	ENSMUSG00000041459.16	Tardbp	chr4	-	148696838	148703248	148696838	148702092	148703121	148703248	1296	10008361321	1,0,7	89811401151	2,1,5	1178	149	0.967011	1	0.992,1.0,0.96	0.983,0.993,0.967	0.003		587	ENSMUSG00000030061.17
934	ENSMUSG00000025001.12	Hells	chr19	+	38923857	38923980	38919473	38919956	38926849	38926906	934	60,56,83	2,0,0	76,57,90	0,0,0	272	149	1	1	0.943,1.0,1.0	1.0,1.0,1.0	-0.019		1304	ENSMUSG00000018570.18	2810408A11Rik	chr11	-	69788928	69789236	69788928	69788976	69789077	69789236	1304	2,0,4	3,3,4	0,0,2	0,1,1	250	149	1	1	0.284,0.0,0.373	NA,0.0,0.544	-0.053		2554	ENSMUSG00000032115.15
935	ENSMUSG00000025001.12	Hells	chr19	+	38932157	38932385	38930897	38930936	38933834	38934017	935	162170230	0,0,0	181218242	0,0,2	377	149	1	1	1.0,1.0,1.0	1.0,1.0,0.98	0.007		1311	ENSMUSG00000040359.15	Ufl1	chr4	-	25269027	25270618	25269027	25269174	25270559	25270618	1311	37,17,32	21,7,9	30,45,25	21,8,16	1534	149	0.95961	1	0.146,0.191,0.257	0.122,0.353,0.132	-0.004		2583	ENSMUSG00000034303.9
936	ENSMUSG00000025001.12	Hells	chr19	+	38938631	38938828	38935168	38935312	38940278	38940375	936	112120219	0,1,0	124166177	0,2,0	346	149	1	1	1.0,0.981,1.0	1.0,0.973,1.0	0.003		1317	ENSMUSG00000027298.18	Tyro3	chr2	+	119642540	119643780	119642540	119642662	119643643	119643780	1317	6,9,10	0,0,0	5,6,4	0,0,1	1130	149	1	1	1.0,1.0,1.0	1.0,1.0,0.345	0.218		3231	ENSMUSG00000021733.12
937	ENSMUSG00000048720.9	Tbc1d12	chr19	+	38854059	38854183	38825022	38825890	38884430	38884513	937	1,3,6	0,0,0	0,10,0	1,0,0	273	149	1	1	1.0,1.0,1.0	0.0,1.0,NA	0.5		1319	ENSMUSG00000027669.15	Gnb4	chr3	-	32643857	32644212	32643857	32644059	32644145	32644212	1319	0,0,3	9,5,6	1,1,1	8,1,8	235	149	0.702397	1	0.0,0.0,0.241	0.073,0.388,0.073	-0.098		1438	ENSMUSG00000059734.8
938	ENSMUSG00000048720.9	Tbc1d12	chr19	+	38871102	38871218	38854059	38854183	38884430	38884513	938	4,6,7	1,0,0	12,9,11	0,0,0	265	149	1	1	0.692,1.0,1.0	1.0,1.0,1.0	-0.103		1320	ENSMUSG00000027406.14	Idh3b	chr2	-	130125857	130126168	130125857	130125956	130126090	130126168	1320	4,5,3	31,25,59	4,9,0	46,32,60	283	149	0.732318	1	0.064,0.095,0.026	0.044,0.129,0.0	0.004		3270	ENSMUSG00000036023.7
939	ENSMUSG00000048720.9	Tbc1d12	chr19	+	38884430	38884513	38871102	38871218	38896215	38896296	939	1,4,3	0,0,0	3,2,5	0,0,1	232	149	1	1	1.0,1.0,1.0	1.0,1.0,0.763	0.079		1330	ENSMUSG00000028137.10	Celf3	chr3	+	94395445	94395977	94395445	94395586	94395833	94395977	1330	4,5,0	4,1,5	1,5,0	1,0,1	396	149	0.887592	1	0.273,0.653,0.0	0.273,1.0,0.0	-0.116		201	ENSMUSG00000024073.17
940	ENSMUSG00000044026.4	Slc35g1	chr19	+	38388881	38389062	38384427	38384749	38391087	38394058	940	22,24,40	0,1,3	24,24,58	2,2,3	330	149	0.265065	1	1.0,0.916,0.858	0.844,0.844,0.897	0.063		1332	ENSMUSG00000027284.17	Cdan1	chr2	-	120560169	120560580	120560169	120560283	120560410	120560580	1332	9,2,10	14,3,11	1,6,6	4,2,8	276	149	0.942245	1	0.258,0.265,0.329	0.119,0.618,0.288	-0.058		2625	ENSMUSG00000042557.15
941	ENSMUSG00000054237.7	Fra10ac1	chr19	-	38201808	38201893	38195710	38195756	38202821	38202905	941	16,17,34	0,0,2	29,34,25	1,1,0	234	149	1	1	1.0,1.0,0.915	0.949,0.956,1.0	0.003		1336	ENSMUSG00000019850.12	Tnfaip3	chr10	-	18879323	18881079	18879323	18879505	18880204	18881079	1336	0,1,0	0,0,0	4,4,2	1,0,0	848	149	1	1	NA,1.0,NA	0.413,1.0,1.0	0.196		80	ENSMUSG00000031161.16
942	ENSMUSG00000012443.5	Kif11	chr19	+	37378759	37378850	37375758	37375883	37379096	37379339	942	62,68,89	0,0,0	39,68,70	1,0,0	240	149	1	1	1.0,1.0,1.0	0.96,1.0,1.0	0.013		1337	ENSMUSG00000019850.12	Tnfaip3	chr10	-	18881298	18882781	18881298	18881479	18882610	18882781	1337	0,3,0	0,0,0	4,0,2	0,2,6	1280	149	1	1	NA,1.0,NA	1.0,0.0,0.037	0.654		726	ENSMUSG00000048285.10
943	ENSMUSG00000012443.5	Kif11	chr19	+	37390652	37390740	37386566	37386655	37391908	37392097	943	61,66,91	1,0,1	66,82,77	0,0,0	237	149	1	1	0.975,1.0,0.983	1.0,1.0,1.0	-0.014		1341	ENSMUSG00000058740.15	Kcnt1	chr2	+	25799216	25799689	25799216	25799318	25799605	25799689	1341	0,1,0	0,0,1	1,0,0	0,0,0	436	149	1	1	NA,1.0,0.0	1.0,NA,NA	-0.5		1603	ENSMUSG00000013858.15
944	ENSMUSG00000012443.5	Kif11	chr19	+	37406348	37406465	37404937	37405080	37408706	37410307	944	61,64,98	1,0,2	85,106,87	0,2,1	266	149	1	1	0.972,1.0,0.965	1.0,0.967,0.98	-0.003		1342	ENSMUSG00000022559.9	Fbxl6	chr15	-	76422116	76422935	76422116	76422275	76422524	76422935	1342	20,22,26	20,11,14	32,48,26	24,26,11	398	149	0.613167	1	0.272,0.428,0.41	0.333,0.409,0.469	-0.034		2356	ENSMUSG00000052812.6
957	ENSMUSG00000071573.15	Rnls	chr19	-	33367316	33367459	33359766	33359925	33368479	33368585	957	0,0,2	0,0,0	0,0,1	0,2,0	292	149	1	1	NA,NA,1.0	NA,0.0,1.0	0.5		1346	ENSMUSG00000003038.16	Hmgn2	chr4	-	133693739	133694106	133693739	133693790	133694076	133694106	1346	35,34,33	354319573	39,23,34	295382510	435	149	0.931798	1	0.033,0.035,0.019	0.043,0.02,0.022	0.001		2195	ENSMUSG00000030615.13
959	ENSMUSG00000087620.8	5330434G04Rik	chrX	-	104421621	104421726	104419267	104419443	104426358	104426555	959	0,0,2	0,0,0	0,0,0	0,0,3	254	149	1	1	NA,NA,1.0	NA,NA,0.0	1		1349	ENSMUSG00000032580.13	Rbm5	chr9	-	107634107	107637590	107634107	107634191	107637520	107637590	1349	344244244	1,1,3	407379292	1,0,7	3478	149	0.675494	1	0.936,0.913,0.777	0.946,1.0,0.641	0.013		3126	ENSMUSG00000032407.15
960	ENSMUSG00000087620.8	5330434G04Rik	chrX	-	104426358	104426555	104391887	104394805	104431487	104431520	960	3,11,2	0,0,1	6,4,3	0,0,0	346	149	1	1	1.0,1.0,0.463	1.0,1.0,1.0	-0.179		1356	ENSMUSG00000026726.11	Cubn	chr2	-	13432647	13433579	13432647	13432829	13433418	13433579	1356	0,2,0	0,0,2	0,0,0	3,2,0	738	149	1	1	NA,1.0,0.0	0.0,0.0,NA	0.5		1580	ENSMUSG00000007833.16
962	ENSMUSG00000013662.7	Atad1	chr19	-	32658032	32658105	32654116	32654250	32661401	32661452	962	0,1,0	40,29,40	0,0,0	33,31,47	222	149	1	1	0.0,0.023,0.0	0.0,0.0,0.0	0.008		1358	ENSMUSG00000086290.10	Snhg12	chr4	+	132037461	132038335	132037461	132037526	132038144	132038335	1358	48,51,69	0,0,1	28,70,76	0,0,0	767	149	1	1	1.0,1.0,0.931	1.0,1.0,1.0	-0.023		1795	ENSMUSG00000028073.16
963	ENSMUSG00000013662.7	Atad1	chr19	-	32661401	32661452	32652857	32654250	32664632	32664722	963	41,30,46	1,0,0	32,32,48	0,0,0	200	149	1	1	0.968,1.0,1.0	1.0,1.0,1.0	-0.011		1359	ENSMUSG00000086290.10	Snhg12	chr4	+	132037461	132038335	132037461	132037815	132038144	132038335	1359	12,34,22	24,14,20	18,26,43	38,33,20	478	149	0.655601	1	0.135,0.431,0.255	0.129,0.197,0.401	0.031		1399	ENSMUSG00000033256.15
970	ENSMUSG00000024827.11	Gldc	chr19	-	30135913	30136049	30128821	30128986	30151823	30151902	970	38,55,89	0,1,0	58,67,77	0,0,0	285	149	1	1	1.0,0.966,1.0	1.0,1.0,1.0	-0.011		1360	ENSMUSG00000029578.16	Wipi2	chr5	+	142643946	142644917	142643946	142644043	142644819	142644917	1360	14,13,12	25,20,34	18,19,17	47,35,27	925	149	0.933344	1	0.083,0.095,0.054	0.058,0.08,0.092	0.001		878	ENSMUSG00000002496.11
972	ENSMUSG00000046138.16	9930021J03Rik	chr19	-	29712515	29712605	29700789	29700905	29720932	29721012	972	3,8,18	0,0,0	7,16,19	0,1,0	239	149	1	1	1.0,1.0,1.0	1.0,0.909,1.0	0.03		1362	ENSMUSG00000044573.17	Acp1	chr12	-	30954868	30955141	30954868	30954982	30955067	30955141	1362	5,3,4	62,94,139	10,4,1	112,91,132	234	149	0.780299	1	0.049,0.02,0.018	0.054,0.027,0.005	0		2751	ENSMUSG00000019822.13
973	ENSMUSG00000046138.16	9930021J03Rik	chr19	-	29763648	29763849	29730999	29732417	29782681	29782907	973	12,16,15	1,3,0	24,23,15	0,0,2	350	149	0.170583	1	0.836,0.694,1.0	1.0,1.0,0.761	-0.077		1363	ENSMUSG00000003166.21	Dgcr2	chr16	-	17676223	17677390	17676223	17676434	17677267	17677390	1363	24,23,39	13,13,29	26,33,32	20,11,23	982	149	0.804189	1	0.219,0.212,0.169	0.165,0.313,0.174	-0.017		265	ENSMUSG00000024188.17
976	ENSMUSG00000038658.16	Ric1	chr19	+	29518655	29518735	29510564	29510672	29539384	29539492	976	24,23,38	3,0,0	43,45,37	0,0,0	229	149	0.814784	1	0.839,1.0,1.0	1.0,1.0,1.0	-0.054		1364	ENSMUSG00000003166.21	Dgcr2	chr16	-	17676223	17677390	17676223	17676443	17677267	17677390	1364	24,23,36	29,25,52	22,30,29	30,19,44	973	149	0.646092	1	0.112,0.123,0.096	0.101,0.195,0.092	-0.019		1025	ENSMUSG00000022106.15
977	ENSMUSG00000038658.16	Ric1	chr19	+	29561574	29561613	29557164	29557368	29561866	29561977	977	10,11,17	0,0,0	10,26,23	0,0,1	188	149	1	1	1.0,1.0,1.0	1.0,1.0,0.948	0.017		1369	ENSMUSG00000036948.18	Trappc14	chr5	-	138259096	138259978	138259096	138259251	138259814	138259978	1369	19,19,22	7,10,12	17,14,19	9,5,11	712	149	0.893642	1	0.362,0.284,0.277	0.283,0.369,0.265	0.002		1034	ENSMUSG00000022124.16
980	ENSMUSG00000024789.14	Jak2	chr19	+	29265300	29265487	29263700	29263812	29272255	29272343	980	18,32,23	0,1,0	26,18,18	0,0,0	336	149	1	1	1.0,0.934,1.0	1.0,1.0,1.0	-0.022		1376	ENSMUSG00000030231.12	Plekha5	chr6	+	140539280	140542836	140539280	140539383	140541974	140542836	1376	52,44,63	4,5,19	66,71,47	21,6,4	2740	149	0.884674	1	0.414,0.324,0.153	0.146,0.392,0.39	-0.012		1831	ENSMUSG00000005981.12
981	ENSMUSG00000024780.8	Cdc37l1	chr19	+	28976660	28976751	28972440	28972722	28984371	28984487	981	31,21,16	0,0,0	18,32,22	0,0,2	240	149	1	1	1.0,1.0,1.0	1.0,1.0,0.872	0.043		1380	ENSMUSG00000026873.10	Phf19	chr2	-	34801175	34801814	34801175	34801257	34801628	34801814	1380	0,2,0	0,0,0	0,1,10	3,1,0	520	149	1	1	NA,1.0,NA	0.0,0.223,1.0	0.592		2401	ENSMUSG00000008892.13
982	ENSMUSG00000024780.8	Cdc37l1	chr19	+	28984972	28985095	28984371	28984487	28989288	28989453	982	38,14,22	0,0,0	12,8,25	0,0,3	272	149	0.777842	1	1.0,1.0,1.0	1.0,1.0,0.82	0.06		1381	ENSMUSG00000024219.17	Anks1	chr17	+	28278267	28281573	28278267	28278365	28279535	28281573	1381	36,42,35	7,5,13	21,39,39	6,9,8	1319	149	0.85623	1	0.367,0.487,0.233	0.283,0.329,0.355	0.04		67	ENSMUSG00000031099.17
983	ENSMUSG00000024780.8	Cdc37l1	chr19	+	28990187	28990310	28989297	28989453	28991210	28991353	983	0,0,0	2,0,0	0,1,1	0,0,0	272	149	1	1	0.0,NA,NA	NA,1.0,1.0	-1		1386	ENSMUSG00000020782.19	Llgl2	chr11	+	115745372	115745931	115745372	115745401	115745888	115745931	1386	1,2,3	1,0,0	2,5,4	0,0,1	636	149	1	1	0.19,1.0,1.0	1.0,1.0,0.484	-0.098		2079	ENSMUSG00000027944.14
984	ENSMUSG00000024780.8	Cdc37l1	chr19	+	28991210	28991353	28989297	28989453	28993405	28993592	984	2,0,0	2,3,5	0,0,0	4,0,8	292	149	1	1	0.338,0.0,0.0	0.0,NA,0.0	0.113		1388	ENSMUSG00000032383.8	Ppib	chr9	+	65970270	65972953	65970270	65970364	65972768	65972953	1388	107103117	141114172	134120108	158156194	2553	149	0.582463	1	0.042,0.05,0.038	0.047,0.043,0.031	0.003		3135	ENSMUSG00000059005.14
988	ENSMUSG00000024924.15	Vldlr	chr19	+	27213639	27213762	27212189	27212312	27215452	27215824	988	2,2,1	2,0,0	49,28,10	0,1,0	272	149	0.598514	1	0.354,1.0,1.0	1.0,0.939,1.0	-0.195		1408	ENSMUSG00000011114.19	Tbrg1	chr9	-	37565511	37566388	37565511	37565732	37566317	37566388	1408	3,1,2	20,22,43	1,6,1	38,35,51	734	149	1	1	0.03,0.009,0.009	0.005,0.034,0.004	0.002		2015	ENSMUSG00000032557.14
989	ENSMUSG00000024924.15	Vldlr	chr19	+	27217244	27217370	27217021	27217141	27217865	27218037	989	2,1,5	1,0,1	50,8,15	1,0,2	275	149	0.876355	1	0.52,1.0,0.73	0.964,1.0,0.803	-0.172		1411	ENSMUSG00000030083.12	Abtb1	chr6	-	88817691	88817882	88817691	88817747	88817819	88817882	1411	0,0,0	0,1,1	0,3,8	4,1,1	221	149	1	1	NA,0.0,0.0	0.0,0.669,0.844	-0.504		1577	ENSMUSG00000033862.8
990	ENSMUSG00000024924.15	Vldlr	chr19	+	27223992	27224076	27222934	27223081	27224409	27224490	990	1,0,0	2,0,0	5,0,0	28,6,13	233	149	1	1	0.242,NA,NA	0.102,0.0,0.0	0.208		1413	ENSMUSG00000030083.12	Abtb1	chr6	-	88817691	88817882	88817691	88817747	88817854	88817882	1413	0,0,0	3,0,0	0,5,8	0,1,0	256	149	1	1	0.0,NA,NA	NA,0.744,1.0	-0.872		2348	ENSMUSG00000001034.18
992	ENSMUSG00000024878.10	Cbwd1	chr19	-	24937702	24937882	24935267	24935354	24938747	24938878	992	0,0,0	8,10,9	0,0,1	7,11,9	329	149	1	1	0.0,0.0,0.0	0.0,0.0,0.048	-0.016		1414	ENSMUSG00000021240.7	Abcd4	chr12	-	84655748	84656247	84655748	84655870	84656152	84656247	1414	2,5,9	2,2,2	11,6,1	4,3,2	431	149	0.63672	1	0.257,0.464,0.609	0.487,0.409,0.147	0.096		2480	ENSMUSG00000017428.17
993	ENSMUSG00000071604.6	Fam189a2	chr19	-	23998969	23999026	23972144	23972255	24007911	24008383	993	0,1,1	0,1,0	2,7,2	0,0,0	206	149	1	1	NA,0.42,1.0	1.0,1.0,1.0	-0.29		1415	ENSMUSG00000021240.7	Abcd4	chr12	-	84659098	84659670	84659098	84659224	84659553	84659670	1415	3,5,7	0,1,0	9,8,3	0,0,0	478	149	1	1	1.0,0.609,1.0	1.0,1.0,1.0	-0.13		2495	ENSMUSG00000001909.17
998	ENSMUSG00000052387.17	Trpm3	chr19	+	22727134	22727209	22710363	22710535	22743997	22744172	998	6,0,0	0,1,0	1,0,3	1,0,1	224	149	1	1	1.0,0.0,NA	0.399,NA,0.666	-0.032		1417	ENSMUSG00000118662.2	Tctn2	chr5	+	124736811	124737305	124736811	124737019	124737197	124737305	1417	0,1,3	4,1,2	8,1,1	3,11,8	327	149	0.599483	1	0.0,0.313,0.406	0.549,0.04,0.054	0.025		2924	ENSMUSG00000018501.18
1003	ENSMUSG00000035171.10	1110059E24Rik	chr19	-	21596472	21596579	21575688	21576232	21629970	21630281	1003	38,19,43	10,2,4	38,54,72	7,1,10	256	149	0.413702	1	0.689,0.847,0.862	0.76,0.969,0.807	-0.046		1419	ENSMUSG00000026944.19	Abca2	chr2	+	25336449	25336719	25336449	25336553	25336626	25336719	1419	0,0,1	9,3,6	0,0,0	6,12,15	222	149	1	1	0.0,0.0,0.101	0.0,0.0,0.0	0.034		2258	ENSMUSG00000000148.18
1005	ENSMUSG00000035171.10	1110059E24Rik	chr19	-	21607873	21608160	21596472	21596579	21629970	21629974	1005	0,2,1	19,7,19	2,0,3	12,14,23	436	149	0.711638	1	0.0,0.089,0.018	0.054,0.0,0.043	0.003		1420	ENSMUSG00000015094.17	Npdc1	chr2	+	25298618	25299013	25298618	25298698	25298916	25299013	1420	2,6,2	6,3,4	8,4,1	6,8,6	367	149	0.90265	1	0.119,0.448,0.169	0.351,0.169,0.063	0.051		2522	ENSMUSG00000038056.16
1018	ENSMUSG00000024726.11	Carnmt1	chr19	+	18667593	18667734	18656467	18656631	18668780	18668959	1018	31,52,68	4,0,0	62,71,64	0,0,0	290	149	0.549153	1	0.799,1.0,1.0	1.0,1.0,1.0	-0.067		1422	ENSMUSG00000026958.14	Dpp7	chr2	-	25245825	25246154	25245825	25245965	25246040	25246154	1422	0,0,1	0,0,1	0,1,1	1,1,1	224	149	1	1	NA,NA,0.399	0.0,0.399,0.399	0.133		1260	ENSMUSG00000030435.17
1019	ENSMUSG00000024726.11	Carnmt1	chr19	+	18668780	18668959	18656467	18656631	18671012	18671126	1019	20,17,28	0,0,0	14,15,19	0,1,0	328	149	1	1	1.0,1.0,1.0	1.0,0.872,1.0	0.043		1423	ENSMUSG00000034101.15	Ctnnd1	chr2	-	84438672	84439418	84438672	84438760	84439303	84439418	1423	10,5,14	103112132	12,14,5	109131153	692	149	0.863351	1	0.02,0.01,0.022	0.023,0.022,0.007	0		1487	ENSMUSG00000021068.18
1020	ENSMUSG00000024726.11	Carnmt1	chr19	+	18680724	18680828	18671012	18671126	18681383	18681586	1020	39,34,39	1,0,0	32,41,47	0,0,1	253	149	1	1	0.958,1.0,1.0	1.0,1.0,0.965	-0.002		1432	ENSMUSG00000014856.13	Tmem208	chr8	+	106054953	106055324	106054953	106055116	106055239	106055324	1432	5,7,4	0,1,0	9,7,12	0,0,0	272	149	1	1	1.0,0.793,1.0	1.0,1.0,1.0	-0.069		3001	ENSMUSG00000037935.17
1027	ENSMUSG00000046230.12	Vps13a	chr19	-	16653409	16653570	16645961	16646065	16655217	16655343	1027	15,13,27	0,3,0	11,22,28	0,1,0	310	149	0.623163	1	1.0,0.676,1.0	1.0,0.914,1.0	-0.079		1442	ENSMUSG00000038346.19	Zfp384	chr6	+	125000995	125001515	125000995	125001233	125001376	125001515	1442	1,7,1	0,0,1	0,10,0	2,0,0	292	149	1	1	1.0,1.0,0.338	0.0,1.0,NA	0.279		1133	ENSMUSG00000094936.9
1028	ENSMUSG00000046230.12	Vps13a	chr19	-	16702920	16703057	16701003	16701136	16712078	16712193	1028	10,5,27	2,0,0	10,17,11	0,0,0	286	149	1	1	0.723,1.0,1.0	1.0,1.0,1.0	-0.092		1446	ENSMUSG00000038346.19	Zfp384	chr6	+	125000995	125002045	125000995	125001233	125001825	125002045	1446	5,16,16	0,0,0	10,25,17	0,0,1	741	149	1	1	1.0,1.0,1.0	1.0,1.0,0.774	0.075		1056	ENSMUSG00000035674.14
1031	ENSMUSG00000046230.12	Vps13a	chr19	-	16729482	16729542	16727485	16727545	16731615	16731725	1031	6,8,9	0,0,0	5,8,18	0,1,0	209	149	1	1	1.0,1.0,1.0	1.0,0.851,1.0	0.05		1449	ENSMUSG00000026399.13	Cd55	chr1	-	130376064	130377300	130376064	130376145	130377153	130377300	1449	4,1,0	4,0,0	8,7,3	0,2,1	1157	149	1	1	0.114,1.0,NA	1.0,0.311,0.279	0.027		565	ENSMUSG00000030346.17
1034	ENSMUSG00000024695.17	Zfp91	chr19	-	12752183	12752298	12748366	12748466	12753358	12753437	1034	137119145	0,1,0	119153172	2,0,2	264	149	1	1	1.0,0.985,1.0	0.971,1.0,0.98	0.011		1454	ENSMUSG00000053552.15	Ebf4	chr2	+	130203748	130204081	130203748	130203814	130203909	130204081	1454	3,2,0	1,0,0	3,8,2	2,0,0	244	149	1	1	0.647,1.0,NA	0.478,1.0,1.0	-0.002		1789	ENSMUSG00000037514.19
1035	ENSMUSG00000024695.17	Zfp91	chr19	-	12753358	12753437	12748366	12748466	12753775	12753826	1035	24,20,31	1,0,0	15,31,29	0,0,0	228	149	1	1	0.94,1.0,1.0	1.0,1.0,1.0	-0.02		1457	ENSMUSG00000028555.16	Ttc39a	chr4	+	109279642	109280139	109279642	109279719	109280071	109280139	1457	2,0,0	0,0,3	0,0,0	2,3,1	501	149	1	1	1.0,NA,0.0	0.0,0.0,0.0	0.5		2213	ENSMUSG00000008305.19
1037	ENSMUSG00000024691.14	Fam111a	chr19	+	12561286	12561486	12554453	12554534	12564198	12567126	1037	55,40,52	1,0,0	47,48,70	0,2,1	349	149	0.577761	1	0.959,1.0,1.0	1.0,0.911,0.968	0.027		1464	ENSMUSG00000028469.16	Npr2	chr4	+	43643605	43644187	43643605	43643683	43644082	43644187	1464	0,3,2	1,2,2	2,0,1	3,3,0	548	149	0.604646	1	0.0,0.29,0.214	0.153,0.0,1.0	-0.216		2260	ENSMUSG00000028284.14
1041	ENSMUSG00000046139.9	Patl1	chr19	+	11899284	11899358	11898732	11898927	11899830	11899932	1041	6,4,9	21,17,21	4,4,8	24,28,28	223	149	0.221156	1	0.16,0.136,0.223	0.1,0.087,0.16	0.057		1467	ENSMUSG00000039515.12	Ptpa	chr2	+	30328240	30329776	30328240	30328365	30329675	30329776	1467	54,55,34	94,62,109	45,86,44	88,85,126	1459	149	0.655845	1	0.055,0.083,0.031	0.05,0.094,0.034	-0.003		2558	ENSMUSG00000029454.16
1057	ENSMUSG00000034445.9	Cyb561a3	chr19	+	10556345	10556438	10554535	10555447	10557826	10557926	1057	1,0,5	1,4,2	4,0,2	6,6,3	242	149	0.668523	1	0.381,0.0,0.606	0.291,0.0,0.291	0.135		1468	ENSMUSG00000026280.18	Atg4b	chr1	+	93703349	93706086	93703349	93703422	93706006	93706086	1468	51,42,40	13,11,9	47,59,47	15,12,13	2733	149	0.922851	1	0.176,0.172,0.195	0.146,0.211,0.165	0.007		2795	ENSMUSG00000020523.15
1058	ENSMUSG00000034445.9	Cyb561a3	chr19	+	10556345	10556438	10554814	10554927	10557826	10557926	1058	1,0,0	0,0,0	2,0,0	0,0,1	242	149	1	1	1.0,NA,NA	1.0,NA,0.0	0.5		1471	ENSMUSG00000026198.16	Abcb6	chr1	-	75151345	75151682	75151345	75151471	75151616	75151682	1471	1,0,6	4,1,9	1,1,0	7,6,11	294	149	1	1	0.112,0.0,0.253	0.068,0.078,0.0	0.073		209	ENSMUSG00000042625.17
1063	ENSMUSG00000036098.16	Myrf	chr19	-	10202812	10202874	10201735	10202015	10206383	10206471	1063	5,0,3	0,0,0	12,4,6	0,0,1	211	149	1	1	1.0,NA,1.0	1.0,1.0,0.809	0.064		1479	ENSMUSG00000005687.15	Bcas2	chr3	+	103081655	103084735	103081655	103081817	103084654	103084735	1479	53,60,77	3,0,0	73,76,70	0,2,1	2986	149	0.614019	1	0.469,1.0,1.0	1.0,0.655,0.777	0.012		229	ENSMUSG00000071653.10
1066	ENSMUSG00000010663.6	Fads1	chr19	+	10162290	10162401	10160251	10160628	10163048	10163246	1066	99,83,118	0,0,0	118,71,83	0,0,1	260	149	1	1	1.0,1.0,1.0	1.0,1.0,0.979	0.007		1482	ENSMUSG00000021546.19	Hnrnpk	chr13	-	58541666	58541973	58541666	58541682	58541889	58541973	1482	32,53,46	693492809	52,54,37	657707750	356	149	0.908388	1	0.019,0.043,0.023	0.032,0.031,0.02	0.001		1470	ENSMUSG00000047909.12
1067	ENSMUSG00000010663.6	Fads1	chr19	+	10163048	10163246	10160302	10160628	10163741	10163843	1067	93,50,90	0,0,2	104,88,94	0,0,0	347	149	1	1	1.0,1.0,0.951	1.0,1.0,1.0	-0.016		1485	ENSMUSG00000033542.14	Arhgef5	chr6	+	43260826	43262363	43260826	43260988	43262292	43262363	1485	2,2,3	1,0,6	7,5,4	5,8,6	1453	149	0.659776	1	0.17,1.0,0.049	0.126,0.06,0.064	0.323		2436	ENSMUSG00000041774.17
1068	ENSMUSG00000010663.6	Fads1	chr19	+	10163741	10163843	10162941	10163246	10164118	10164247	1068	166,96,162	0,0,0	211141145	0,3,1	251	149	1	1	1.0,1.0,1.0	1.0,0.965,0.989	0.015		1487	ENSMUSG00000029860.17	Zyx	chr6	+	42326966	42327410	42326966	42327053	42327190	42327410	1487	1,10,7	8,9,1	3,9,7	8,7,6	286	149	0.908204	1	0.061,0.367,0.785	0.163,0.401,0.378	0.09		2	ENSMUSG00000068457.15
1069	ENSMUSG00000010663.6	Fads1	chr19	+	10168803	10168864	10164118	10164247	10170275	10170352	1069	113,90,134	0,0,4	145117128	0,0,0	210	149	1	1	1.0,1.0,0.96	1.0,1.0,1.0	-0.013		1493	ENSMUSG00000091625.9	Lsm5	chr6	-	56679990	56680394	56679990	56680018	56680298	56680394	1493	1,3,6	38,21,64	1,6,5	42,47,59	429	149	0.931673	1	0.009,0.047,0.032	0.008,0.042,0.029	0.003		6	ENSMUSG00000031381.17
1070	ENSMUSG00000010663.6	Fads1	chr19	+	10170275	10170352	10164118	10164247	10171064	10171162	1070	13,9,20	0,0,0	17,10,20	0,0,1	226	149	1	1	1.0,1.0,1.0	1.0,1.0,0.93	0.023		1495	ENSMUSG00000031505.12	Naxd	chr8	+	11559321	11559557	11559321	11559372	11559452	11559557	1495	2,8,2	4,6,12	4,1,5	2,13,11	229	149	0.703438	1	0.245,0.465,0.098	0.565,0.048,0.228	-0.011		7	ENSMUSG00000031381.17
1071	ENSMUSG00000010663.6	Fads1	chr19	+	10171852	10171978	10171681	10171761	10172234	10174238	1071	87,88,107	0,0,2	117,87,110	0,0,0	275	149	1	1	1.0,1.0,0.967	1.0,1.0,1.0	-0.011		1500	ENSMUSG00000022995.17	Enah	chr1	-	181746889	181747194	181746889	181747021	181747123	181747194	1500	72,61,76	0,0,0	82,112,71	0,2,0	251	149	1	1	1.0,1.0,1.0	1.0,0.971,1.0	0.01		8	ENSMUSG00000031381.17
1075	ENSMUSG00000024663.21	Rab3il1	chr19	+	10005648	10005867	10004923	10005001	10007513	10007642	1075	26,20,34	4,0,0	25,36,26	1,0,0	368	149	0.262825	1	0.725,1.0,1.0	0.91,1.0,1.0	-0.062		1502	ENSMUSG00000036620.15	Mgat4b	chr11	+	50121787	50122151	50121787	50121928	50122017	50122151	1502	3,15,10	2,8,8	10,18,13	6,7,21	238	149	0.668926	1	0.484,0.54,0.439	0.511,0.617,0.279	0.019		9	ENSMUSG00000031381.17
1076	ENSMUSG00000024663.21	Rab3il1	chr19	+	10006837	10006984	10005648	10005867	10007513	10007642	1076	0,0,0	5,0,6	1,0,0	0,5,6	296	149	1	1	0.0,NA,0.0	1.0,0.0,0.0	-0.333		1503	ENSMUSG00000000134.18	Tfe3	chrX	+	7632793	7633923	7632793	7633094	7633677	7633923	1503	6,2,4	35,13,30	4,2,4	29,21,14	732	149	1	1	0.034,0.03,0.026	0.027,0.019,0.055	-0.004		13	ENSMUSG00000031381.17
1077	ENSMUSG00000071644.11	Eef1g	chr19	+	8947948	8948111	8947207	8947351	8949870	8950000	1077	0,0,1	567395749	1,0,0	710761904	312	149	1	1	0.0,0.0,0.001	0.001,0.0,0.0	0		1506	ENSMUSG00000000134.18	Tfe3	chrX	+	7638687	7641440	7638687	7638835	7639732	7641440	1506	5,3,4	8,9,10	5,7,5	8,27,23	1046	149	0.589748	1	0.082,0.045,0.054	0.082,0.036,0.03	0.011		14	ENSMUSG00000031381.17
1079	ENSMUSG00000071646.10	Mta2	chr19	+	8928499	8928648	8928275	8928394	8928853	8929667	1079	74,91,87	0,1,0	61,67,108	0,0,1	298	149	1	1	1.0,0.978,1.0	1.0,1.0,0.982	-0.001		1507	ENSMUSG00000040506.17	Ambra1	chr2	+	91602635	91604092	91602635	91602782	91603055	91604092	1507	23,22,30	3,5,5	36,30,20	5,6,2	422	149	0.760943	1	0.73,0.608,0.679	0.718,0.638,0.779	-0.039		15	ENSMUSG00000031381.17
1081	ENSMUSG00000071647.6	Eml3	chr19	+	8915825	8915893	8914926	8915058	8916391	8916480	1081	12,38,33	0,3,2	37,19,29	0,0,0	217	149	0.140996	1	1.0,0.897,0.919	1.0,1.0,1.0	-0.061		1509	ENSMUSG00000006958.15	Chrd	chr16	+	20557302	20557914	20557302	20557566	20557860	20557914	1509	2,0,0	1,0,0	0,0,1	0,0,0	443	149	1	1	0.402,NA,NA	NA,NA,1.0	-0.598		18	ENSMUSG00000087403.10
1082	ENSMUSG00000071649.7	B3gat3	chr19	+	8899169	8899344	8897737	8898012	8902901	8903262	1082	34,37,54	1,0,0	47,70,61	0,0,0	324	149	1	1	0.94,1.0,1.0	1.0,1.0,1.0	-0.02		1510	ENSMUSG00000006958.15	Chrd	chr16	+	20558156	20558806	20558156	20558260	20558703	20558806	1510	0,1,0	0,0,1	0,1,0	0,0,0	592	149	1	1	NA,1.0,0.0	NA,1.0,NA	-0.5		20	ENSMUSG00000041353.13
1083	ENSMUSG00000071650.7	Ganab	chr19	+	8876559	8876758	8875434	8875523	8879627	8879732	1083	1,4,0	72,40,43	3,2,2	43,56,55	348	149	0.679368	1	0.006,0.041,0.0	0.029,0.015,0.015	-0.004		1515	ENSMUSG00000057193.9	Slc44a2	chr9	+	21258330	21259282	21258330	21258425	21259178	21259282	1515	7,12,7	2,1,6	2,18,5	2,4,3	902	149	0.735425	1	0.366,0.665,0.162	0.142,0.426,0.216	0.136		22	ENSMUSG00000031285.15
1084	ENSMUSG00000071650.7	Ganab	chr19	+	8880599	8880708	8879885	8879994	8882298	8882426	1084	0,1,0	55,35,66	0,1,0	64,82,76	258	149	1	1	0.0,0.016,0.0	0.0,0.007,0.0	0.003		1527	ENSMUSG00000031604.11	Msmo1	chr8	-	65175497	65176770	65175497	65175624	65176621	65176770	1527	49,59,27	52,38,79	53,73,23	35,59,74	1146	149	0.694426	1	0.109,0.168,0.043	0.164,0.139,0.039	-0.007		23	ENSMUSG00000031429.15
1085	ENSMUSG00000071650.7	Ganab	chr19	+	8885214	8885280	8884578	8884758	8886041	8886111	1085	14,16,19	52,27,77	32,16,26	59,35,76	215	149	0.221185	1	0.157,0.291,0.146	0.273,0.241,0.192	-0.037		1532	ENSMUSG00000030871.12	Ears2	chr7	-	121643524	121643889	121643524	121643655	121643735	121643889	1532	0,1,1	7,0,9	0,0,0	4,0,2	229	149	1	1	0.0,1.0,0.067	0.0,NA,0.0	0.356		26	ENSMUSG00000072966.12
1086	ENSMUSG00000051579.11	Tceal8	chrX	-	135072168	135072270	135069732	135071798	135072384	135072454	1086	0,5,1	93,86,124	1,1,2	99,84,145	251	149	1	1	0.0,0.033,0.005	0.006,0.007,0.008	0.006		1533	ENSMUSG00000030871.12	Ears2	chr7	-	121645846	121647797	121645846	121645955	121647324	121647797	1533	31,30,46	7,14,7	39,40,39	10,7,22	1518	149	0.606575	1	0.303,0.174,0.392	0.277,0.359,0.148	0.028		35	ENSMUSG00000087174.8
1089	ENSMUSG00000071662.5	Polr2g	chr19	-	8774599	8774759	8771843	8771894	8775587	8775697	1089	53,41,92	4,0,1	68,69,78	1,3,0	309	149	0.816461	1	0.865,1.0,0.978	0.97,0.917,1.0	-0.015		1537	ENSMUSG00000047617.12	Paxx	chr2	-	25349496	25349871	25349496	25349713	25349786	25349871	1537	0,0,2	0,1,0	0,1,0	3,0,1	222	149	1	1	NA,0.0,1.0	0.0,1.0,0.0	0.167		37	ENSMUSG00000086370.10
1090	ENSMUSG00000118346.2	Tmem179b	chr19	-	8750653	8750788	8750391	8750470	8750868	8750986	1090	7,9,5	0,3,0	19,11,16	1,2,0	284	149	0.58985	1	1.0,0.611,1.0	0.909,0.743,1.0	-0.014		1538	ENSMUSG00000047617.12	Paxx	chr2	-	25349786	25350369	25349786	25349871	25350020	25350369	1538	2,0,0	2,0,2	0,0,0	2,0,2	298	149	1	1	0.333,NA,0.0	0.0,NA,0.0	0.167		39	ENSMUSG00000079487.12
1091	ENSMUSG00000118346.2	Tmem179b	chr19	-	8750868	8750986	8750391	8750470	8751698	8751831	1091	0,3,0	2,0,0	1,0,0	0,0,0	267	149	1	1	0.0,1.0,NA	1.0,NA,NA	-0.5		1540	ENSMUSG00000047617.12	Paxx	chr2	-	25350456	25350727	25350456	25350506	25350666	25350727	1540	3,0,1	3,0,0	1,3,2	0,0,2	309	149	1	1	0.325,NA,1.0	1.0,1.0,0.325	-0.113		44	ENSMUSG00000031398.14
1092	ENSMUSG00000118346.2	Tmem179b	chr19	-	8750868	8751056	8750391	8750470	8751698	8751831	1092	4,9,2	2,0,0	10,6,4	0,0,0	337	149	0.729044	1	0.469,1.0,1.0	1.0,1.0,1.0	-0.177		1545	ENSMUSG00000038518.16	Jarid2	chr13	+	45064012	45066762	45064012	45064083	45066656	45066762	1545	36,30,34	0,0,1	51,58,40	0,0,0	2722	149	1	1	1.0,1.0,0.65	1.0,1.0,1.0	-0.117		45	ENSMUSG00000031398.14
1093	ENSMUSG00000010110.18	Stx5a	chr19	+	8719617	8719861	8718776	8718939	8720217	8720224	1093	44,41,45	2,0,0	41,43,47	0,0,0	393	149	1	1	0.893,1.0,1.0	1.0,1.0,1.0	-0.036		1548	ENSMUSG00000038235.5	F11r	chr1	+	171287930	171288213	171287930	171287999	171288105	171288213	1548	0,0,1	12,6,26	1,0,0	27,20,23	255	149	1	1	0.0,0.0,0.022	0.021,0.0,0.0	0		47	ENSMUSG00000002010.18
1094	ENSMUSG00000010110.18	Stx5a	chr19	+	8720217	8720288	8719166	8719861	8720443	8720499	1094	30,36,36	0,0,0	37,41,39	0,2,0	220	149	1	1	1.0,1.0,1.0	1.0,0.933,1.0	0.022		1550	ENSMUSG00000005566.15	Trim28	chr7	+	12762334	12762705	12762334	12762481	12762590	12762705	1550	7,6,11	101,95,172	4,21,5	88165184	258	149	0.859548	1	0.038,0.035,0.036	0.026,0.068,0.015	0		53	ENSMUSG00000057836.13
1095	ENSMUSG00000108414.2	Snhg1	chr19	+	8701740	8701847	8701510	8701553	8702035	8702085	1095	19,22,30	0,0,1	48,18,34	0,0,0	256	149	1	1	1.0,1.0,0.946	1.0,1.0,1.0	-0.018		1551	ENSMUSG00000005566.15	Trim28	chr7	+	12763014	12763179	12763014	12763051	12763133	12763179	1551	31,33,40	361289455	36,39,34	354441459	231	149	0.641836	1	0.052,0.069,0.054	0.062,0.054,0.046	0.004		56	ENSMUSG00000031189.13
1096	ENSMUSG00000108414.2	Snhg1	chr19	+	8701766	8701847	8701368	8701553	8702035	8702085	1096	39,30,63	0,0,1	71,29,55	0,0,0	230	149	1	1	1.0,1.0,0.976	1.0,1.0,1.0	-0.008		1553	ENSMUSG00000013997.11	Nit1	chr1	-	171171631	171172107	171171631	171171735	171171855	171172107	1553	1,1,0	9,7,11	0,0,1	12,13,6	269	149	1	1	0.058,0.073,0.0	0.0,0.0,0.085	0.015		59	ENSMUSG00000085396.8
1103	ENSMUSG00000024968.15	Rcor2	chr19	+	7248334	7248459	7248062	7248224	7248557	7248627	1103	49,41,60	0,0,1	86,79,89	0,0,3	274	149	1	1	1.0,1.0,0.97	1.0,1.0,0.942	0.009		1554	ENSMUSG00000056162.15	Cndp1	chr18	-	84654171	84656089	84654171	84654334	84655939	84656089	1554	1,1,1	0,0,0	0,1,0	2,0,0	1754	149	1	1	1.0,1.0,1.0	0.0,1.0,NA	0.5		62	ENSMUSG00000031109.17
1104	ENSMUSG00000024764.11	Naa40	chr19	-	7207086	7207170	7203077	7205794	7211468	7211521	1104	4,3,4	1,0,1	2,5,15	0,1,0	233	149	1	1	0.719,1.0,0.719	1.0,0.762,1.0	-0.108		1562	ENSMUSG00000040562.13	Gstm2	chr3	-	107892933	107893425	107892933	107892998	107893349	107893425	1562	0,0,0	5,2,6	0,1,0	9,2,6	500	149	1	1	0.0,0.0,0.0	0.0,0.13,0.0	-0.043		63	ENSMUSG00000031109.17
1105	ENSMUSG00000024764.11	Naa40	chr19	-	7207086	7207648	7205716	7205794	7211468	7211521	1105	60,35,54	1,0,1	33,39,79	0,1,0	711	149	1	1	0.926,1.0,0.919	1.0,0.891,1.0	-0.015		1563	ENSMUSG00000013593.13	Ndufs2	chr1	-	171065513	171065941	171065513	171065633	171065855	171065941	1563	4,5,7	35,23,40	4,10,7	35,45,38	371	149	0.751032	1	0.044,0.08,0.066	0.044,0.082,0.069	-0.002		68	ENSMUSG00000037475.16
1106	ENSMUSG00000024764.11	Naa40	chr19	-	7207312	7207471	7207086	7207170	7207552	7207648	1106	139128214	2,1,6	153181183	1,4,1	308	149	0.295939	1	0.971,0.984,0.945	0.987,0.956,0.989	-0.011		1566	ENSMUSG00000026213.16	Stk11ip	chr1	+	75503701	75504110	75503701	75503828	75504006	75504110	1566	4,0,7	16,7,19	6,3,3	8,26,19	327	149	0.90989	1	0.102,0.0,0.144	0.255,0.05,0.067	-0.042		76	ENSMUSG00000031060.17
1107	ENSMUSG00000024764.11	Naa40	chr19	-	7207312	7207471	7207086	7207170	7211468	7211521	1107	129118192	1,0,0	137165174	0,0,0	308	149	1	1	0.984,1.0,1.0	1.0,1.0,1.0	-0.005		1567	ENSMUSG00000021453.3	Gadd45g	chr13	+	52001387	52001805	52001387	52001489	52001591	52001805	1567	3,4,0	9,2,2	4,0,1	0,2,1	251	149	0.831167	1	0.165,0.543,0.0	1.0,0.0,0.372	-0.221		79	ENSMUSG00000031167.17
1108	ENSMUSG00000024764.11	Naa40	chr19	-	7207552	7207648	7207086	7207170	7211468	7211521	1108	36,16,41	1,0,0	13,22,48	0,0,0	245	149	1	1	0.956,1.0,1.0	1.0,1.0,1.0	-0.015		1569	ENSMUSG00000029290.13	Zfp326	chr5	+	106034182	106036705	106034182	106034294	106036299	106036705	1569	127138100	9,18,18	146142105	9,20,26	2154	149	0.781579	1	0.494,0.347,0.278	0.529,0.329,0.218	0.014		81	ENSMUSG00000031154.16
1109	ENSMUSG00000024764.11	Naa40	chr19	-	7207552	7207648	7207312	7207471	7211468	7211521	1109	44,26,57	0,1,0	27,34,55	0,0,0	245	149	1	1	1.0,0.941,1.0	1.0,1.0,1.0	-0.02		1571	ENSMUSG00000029208.17	Guf1	chr5	+	69714295	69715639	69714295	69714508	69715527	69715639	1571	25,19,27	12,9,31	32,18,32	17,20,23	1168	149	0.917103	1	0.21,0.212,0.1	0.194,0.103,0.151	0.025		83	ENSMUSG00000031150.14
1110	ENSMUSG00000036278.8	Macrod1	chr19	+	7175066	7175101	7174896	7174978	7175277	7175422	1110	0,0,0	1,0,2	1,3,1	1,0,0	184	149	1	1	0.0,NA,0.0	0.447,1.0,1.0	-0.816		1575	ENSMUSG00000029775.15	Klhdc10	chr6	+	30447939	30449629	30447939	30447987	30449489	30449629	1575	19,30,25	51,42,55	28,34,31	49,61,73	1651	149	0.897946	1	0.033,0.061,0.039	0.049,0.048,0.037	0		88	ENSMUSG00000039382.13
1111	ENSMUSG00000024966.10	Stip1	chr19	-	7002682	7002807	6999639	6999676	7003659	7003756	1111	366390528	0,0,0	443559613	2,1,0	274	149	1	1	1.0,1.0,1.0	0.992,0.997,1.0	0.004		1580	ENSMUSG00000035875.16	AI182371	chr2	-	34976112	34976525	34976112	34976175	34976442	34976525	1580	4,0,2	1,0,0	0,0,0	0,0,5	416	149	1	1	0.589,NA,1.0	NA,NA,0.0	0.794		90	ENSMUSG00000004317.15
1112	ENSMUSG00000024966.10	Stip1	chr19	-	7009848	7010017	7006475	7006602	7011530	7011672	1112	523399714	0,1,0	438664706	0,0,0	318	149	1	1	1.0,0.995,1.0	1.0,1.0,1.0	-0.002		1581	ENSMUSG00000026577.14	Blzf1	chr1	-	164134715	164135058	164134715	164134923	164135010	164135058	1581	5,2,0	0,1,0	0,0,5	0,0,0	236	149	1	1	1.0,0.558,NA	NA,NA,1.0	-0.221		91	ENSMUSG00000057858.9
1115	ENSMUSG00000024963.13	Dnajc4	chr19	-	6966790	6966952	6965556	6965643	6967048	6967233	1115	1,5,3	3,0,0	12,5,7	0,0,2	311	149	0.200863	1	0.138,1.0,1.0	1.0,1.0,0.626	-0.163		1583	ENSMUSG00000017210.15	Med24	chr11	-	98607239	98608968	98607239	98607351	98608735	98608968	1583	44,21,26	44,47,44	37,45,20	43,40,64	1533	149	0.852678	1	0.089,0.042,0.054	0.077,0.099,0.029	-0.007		99	ENSMUSG00000025219.14
1116	ENSMUSG00000024963.13	Dnajc4	chr19	-	6966790	6966955	6965556	6965643	6967048	6967233	1116	2,5,4	3,0,0	15,5,6	0,0,2	314	149	0.26677	1	0.24,1.0,1.0	1.0,1.0,0.587	-0.116		1584	ENSMUSG00000022160.19	Mettl3	chr14	-	52537157	52537562	52537157	52537276	52537490	52537562	1584	30,27,53	0,0,0	31,67,58	2,0,0	363	149	1	1	1.0,1.0,1.0	0.864,1.0,1.0	0.045		100	ENSMUSG00000025219.14
1117	ENSMUSG00000024960.10	Plcb3	chr19	-	6946752	6946881	6943999	6944077	6951562	6951719	1117	0,3,0	2,0,0	1,0,1	3,0,0	278	149	1	1	0.0,1.0,NA	0.152,NA,1.0	-0.076		1585	ENSMUSG00000000732.10	Icosl	chr10	+	77906994	77907925	77906994	77907113	77907571	77907925	1585	3,2,2	0,0,0	0,0,0	1,1,0	607	149	1	1	1.0,1.0,1.0	0.0,0.0,NA	1		101	ENSMUSG00000036097.9
1124	ENSMUSG00000024955.16	Esrra	chr19	-	6897430	6897767	6891446	6891563	6898989	6899176	1124	6,6,4	1,0,0	11,5,11	0,0,0	486	149	1	1	0.648,1.0,1.0	1.0,1.0,1.0	-0.117		1586	ENSMUSG00000043243.16	Niban3	chr8	+	72054742	72055132	72054742	72054910	72055016	72055132	1586	0,0,0	5,1,0	1,1,1	0,4,1	255	149	1	1	0.0,0.0,NA	1.0,0.127,0.369	-0.499		104	ENSMUSG00000025195.10
1129	ENSMUSG00000024949.18	Sf1	chr19	+	6425687	6425892	6424748	6424928	6426325	6426542	1129	125108153	15,21,26	125162143	12,18,24	354	149	0.262592	1	0.778,0.684,0.712	0.814,0.791,0.715	-0.049		1587	ENSMUSG00000043243.16	Niban3	chr8	+	72057571	72058362	72057571	72057679	72058250	72058362	1587	8,5,0	1,0,0	4,8,3	3,1,0	720	149	1	1	0.623,1.0,NA	0.216,0.623,1.0	0.199		105	ENSMUSG00000049164.8
1132	ENSMUSG00000024948.16	Map4k2	chr19	+	6393831	6393913	6393490	6393553	6394001	6394109	1132	10,15,14	2,0,0	16,17,26	0,0,0	231	149	1	1	0.763,1.0,1.0	1.0,1.0,1.0	-0.079		1590	ENSMUSG00000025979.14	Mob4	chr1	+	55189304	55190241	55189304	55189384	55190129	55190241	1590	11,6,22	61,53,58	5,16,19	63,51,78	894	149	0.784345	1	0.029,0.019,0.059	0.013,0.05,0.039	0.002		107	ENSMUSG00000073131.13
1134	ENSMUSG00000024773.16	Atg2a	chr19	+	6305130	6305295	6304619	6304696	6305438	6305568	1134	4,8,7	0,2,0	11,6,9	0,0,0	314	149	1	1	1.0,0.655,1.0	1.0,1.0,1.0	-0.115		1592	ENSMUSG00000032892.15	Rangrf	chr11	-	68863309	68863854	68863309	68863567	68863768	68863854	1592	3,9,2	45,30,50	1,5,9	29,50,45	350	149	0.887742	1	0.028,0.113,0.017	0.014,0.041,0.078	0.008		109	ENSMUSG00000024776.19
1135	ENSMUSG00000024773.16	Atg2a	chr19	+	6305130	6305301	6304619	6304696	6305438	6305568	1135	3,10,7	0,2,0	3,4,8	0,0,0	320	149	1	1	1.0,0.7,1.0	1.0,1.0,1.0	-0.1		1597	ENSMUSG00000021838.18	Samd4	chr14	+	47121855	47122473	47121855	47122247	47122455	47122473	1597	17,15,34	0,2,0	35,30,23	1,0,0	357	149	1	1	1.0,0.758,1.0	0.936,1.0,1.0	-0.059		115	ENSMUSG00000046230.12
1136	ENSMUSG00000024777.11	Ppp2r5b	chr19	-	6279251	6279379	6278971	6279073	6280185	6280305	1136	3,11,18	0,1,0	9,11,12	0,0,0	277	149	1	1	1.0,0.855,1.0	1.0,1.0,1.0	-0.048		1602	ENSMUSG00000026409.15	Pfkfb2	chr1	-	130625433	130626480	130625433	130625822	130626415	130626480	1602	1,4,5	6,0,2	6,2,4	8,5,0	742	149	0.942158	1	0.032,1.0,0.334	0.131,0.074,1.0	0.054		122	ENSMUSG00000010110.18
1142	ENSMUSG00000024787.15	Snx15	chr19	-	6173859	6173980	6172069	6172185	6174182	6174218	1142	8,6,5	0,1,0	10,5,5	0,0,0	270	149	1	1	1.0,0.768,1.0	1.0,1.0,1.0	-0.077		1606	ENSMUSG00000026176.14	Ctdsp1	chr1	+	74432436	74433060	74432436	74432585	74432955	74433060	1606	14,16,19	94,87,143	27,21,24	133192146	519	149	0.891137	1	0.041,0.05,0.037	0.055,0.03,0.045	-0.001		123	ENSMUSG00000108414.2
1145	ENSMUSG00000024797.15	Vps51	chr19	-	6121295	6121515	6120110	6121186	6121591	6121738	1145	51,40,74	0,1,0	69,80,58	0,0,0	369	149	1	1	1.0,0.942,1.0	1.0,1.0,1.0	-0.019		1608	ENSMUSG00000042487.7	Leo1	chr9	+	75354383	75355678	75354383	75354488	75355583	75355678	1608	18,11,7	13,17,15	9,5,22	15,12,17	1244	149	0.828789	1	0.142,0.072,0.053	0.067,0.048,0.134	0.006		126	ENSMUSG00000024960.10
1150	ENSMUSG00000024799.17	Tm7sf2	chr19	-	6117152	6117349	6116175	6117052	6117698	6117806	1150	4,6,7	1,0,0	14,15,17	1,0,2	346	149	0.786252	1	0.633,1.0,1.0	0.858,1.0,0.785	-0.003		1614	ENSMUSG00000040859.15	Bsdc1	chr4	+	129359022	129360783	129359022	129359139	129360706	129360783	1614	40,31,27	0,0,0	53,67,36	2,1,0	1716	149	0.829766	1	1.0,1.0,1.0	0.697,0.853,1.0	0.15		127	ENSMUSG00000024949.18
1151	ENSMUSG00000007338.11	Mrpl49	chr19	-	6106958	6107109	6104960	6105230	6107688	6107815	1151	33,30,63	0,0,0	61,45,66	1,1,2	300	149	0.580944	1	1.0,1.0,1.0	0.968,0.957,0.942	0.044		1618	ENSMUSG00000073758.11	Sh3d21	chr4	-	126055760	126056059	126055760	126055816	126055968	126056059	1618	1,0,7	0,1,1	2,1,0	0,0,0	301	149	1	1	1.0,0.0,0.776	1.0,1.0,NA	-0.408		129	ENSMUSG00000024773.16
1152	ENSMUSG00000024833.16	Pola2	chr19	-	6011118	6011214	6006708	6009152	6013853	6014191	1152	22,15,29	2,0,0	22,36,39	0,0,0	245	149	1	1	0.87,1.0,1.0	1.0,1.0,1.0	-0.043		1630	ENSMUSG00000019338.14	Zfp687	chr3	-	94916653	94917533	94916653	94916830	94917354	94917533	1630	18,15,14	12,15,13	22,17,21	20,12,14	673	149	0.685213	1	0.249,0.181,0.193	0.196,0.239,0.249	-0.02		131	ENSMUSG00000024787.15
1153	ENSMUSG00000024833.16	Pola2	chr19	-	6011118	6011243	6009060	6009152	6013853	6014180	1153	65,51,88	2,0,0	74,83,91	0,0,0	274	149	1	1	0.946,1.0,1.0	1.0,1.0,1.0	-0.018		1631	ENSMUSG00000040289.9	Hey1	chr3	-	8731004	8731415	8731004	8731086	8731331	8731415	1631	0,1,3	7,11,27	0,2,2	16,9,9	394	149	0.830832	1	0.0,0.033,0.04	0.0,0.078,0.078	-0.028		133	ENSMUSG00000024937.16
1154	ENSMUSG00000024833.16	Pola2	chr19	-	6013321	6013426	6011118	6011243	6013853	6014176	1154	0,0,0	17,19,35	1,0,0	31,35,34	254	149	1	1	0.0,0.0,0.0	0.019,0.0,0.0	-0.006		1635	ENSMUSG00000021066.10	Atl1	chr12	+	69978990	69981694	69978990	69979095	69981643	69981694	1635	14,14,6	0,1,0	14,18,5	0,0,0	2697	149	1	1	1.0,0.436,1.0	1.0,1.0,1.0	-0.188		134	ENSMUSG00000024937.16
1155	ENSMUSG00000092274.4	Neat1	chr19	-	5894605	5894786	5893708	5894462	5894952	5894994	1155	0,0,0	1,0,0	0,1,0	0,0,0	330	149	1	1	0.0,NA,NA	NA,1.0,NA	-1		1639	ENSMUSG00000009640.12	Dmap1	chr4	-	117533146	117533714	117533146	117533332	117533546	117533714	1639	5,6,8	12,18,22	13,10,7	28,22,35	363	149	0.837551	1	0.146,0.12,0.13	0.16,0.157,0.076	0.001		137	ENSMUSG00000024873.8
1156	ENSMUSG00000024941.10	Scyl1	chr19	-	5819748	5819839	5819496	5819652	5820230	5820580	1156	41,28,18	2,0,0	30,33,31	0,0,0	240	149	1	1	0.927,1.0,1.0	1.0,1.0,1.0	-0.024		1640	ENSMUSG00000057948.13	Unc13d	chr11	-	115960706	115960937	115960706	115960763	115960846	115960937	1640	0,0,0	0,1,0	4,5,2	0,0,0	232	149	1	1	NA,0.0,NA	1.0,1.0,1.0	-1		141	ENSMUSG00000024858.15
1157	ENSMUSG00000024940.12	Ltbp3	chr19	+	5806611	5806740	5806274	5806358	5806821	5806959	1157	8,1,2	0,0,0	9,5,0	1,0,0	278	149	1	1	1.0,1.0,1.0	0.828,1.0,NA	0.086		1641	ENSMUSG00000037652.16	Phc3	chr3	-	30990433	30991305	30990433	30990748	30990874	30991305	1641	18,14,17	0,0,2	25,31,22	0,0,0	275	149	1	1	1.0,1.0,0.822	1.0,1.0,1.0	-0.059		143	ENSMUSG00000024830.18
1158	ENSMUSG00000024940.12	Ltbp3	chr19	+	5807062	5807203	5806821	5806959	5807338	5807500	1158	0,0,0	1,1,3	4,0,0	6,3,3	290	149	0.267403	1	0.0,0.0,0.0	0.255,0.0,0.0	-0.085		1642	ENSMUSG00000000759.15	Tubgcp3	chr8	-	12674817	12675113	12674817	12674949	12675024	12675113	1642	1,2,3	56,55,66	0,2,2	44,54,44	224	149	0.660154	1	0.012,0.024,0.029	0.0,0.024,0.029	0.004		145	ENSMUSG00000024856.11
1161	ENSMUSG00000024927.9	Rela	chr19	+	5689886	5689978	5688882	5689031	5690330	5690460	1161	8,11,16	0,0,0	15,14,19	0,1,0	241	149	1	1	1.0,1.0,1.0	1.0,0.896,1.0	0.035		1643	ENSMUSG00000000759.15	Tubgcp3	chr8	-	12687666	12689715	12687666	12687802	12689525	12689715	1643	25,37,35	45,30,42	33,36,20	37,41,27	1872	149	0.952527	1	0.042,0.089,0.062	0.066,0.065,0.056	0.002		146	ENSMUSG00000024856.11
1163	ENSMUSG00000024926.11	Kat5	chr19	-	5658829	5658985	5658665	5658740	5659263	5659400	1163	24,10,20	15,14,18	19,34,25	17,14,16	305	149	0.244861	1	0.439,0.259,0.352	0.353,0.543,0.433	-0.093		1644	ENSMUSG00000000759.15	Tubgcp3	chr8	-	12698620	12699822	12698620	12698787	12699689	12699822	1644	28,15,13	16,13,22	26,18,11	13,18,15	1051	149	0.804081	1	0.199,0.141,0.077	0.221,0.124,0.094	-0.007		147	ENSMUSG00000037916.15
1164	ENSMUSG00000056185.6	Snx32	chr19	-	5547702	5547807	5547474	5547580	5547932	5548056	1164	2,1,1	0,0,0	9,0,4	0,2,0	254	149	0.24215	1	1.0,1.0,1.0	1.0,0.0,1.0	0.333		1648	ENSMUSG00000026848.15	Tor1b	chr2	+	30843763	30845965	30843763	30844029	30845789	30845965	1648	67,68,82	4,5,15	67,70,64	5,12,8	1909	149	0.65557	1	0.567,0.515,0.299	0.511,0.313,0.384	0.058		148	ENSMUSG00000024829.13
1167	ENSMUSG00000024853.11	Sf3b2	chr19	-	5336216	5336444	5334142	5334752	5336604	5336685	1167	295230399	1,0,0	358365387	0,0,0	377	149	1	1	0.991,1.0,1.0	1.0,1.0,1.0	-0.003		1651	ENSMUSG00000037376.15	Trmt6	chr2	-	132650123	132650936	132650123	132650209	132650580	132650936	1651	2,9,4	23,29,40	2,5,6	21,28,29	520	149	0.895865	1	0.024,0.082,0.028	0.027,0.049,0.056	0.001		151	ENSMUSG00000025420.14
1168	ENSMUSG00000024853.11	Sf3b2	chr19	-	5337562	5337654	5337096	5337312	5337937	5338034	1168	126,84,151	0,0,1	125140159	0,0,0	241	149	1	1	1.0,1.0,0.989	1.0,1.0,1.0	-0.004		1653	ENSMUSG00000038685.19	Rtel1	chr2	+	180996145	180997345	180996145	180996235	180997102	180997345	1653	16,27,43	0,0,3	50,44,43	1,0,1	1016	149	1	1	1.0,1.0,0.678	0.88,1.0,0.863	-0.022		154	ENSMUSG00000044906.7
1169	ENSMUSG00000024853.11	Sf3b2	chr19	-	5337937	5338034	5337562	5337654	5338331	5338438	1169	154101190	0,0,1	142170184	0,2,0	246	149	1	1	1.0,1.0,0.991	1.0,0.981,1.0	0.003		1657	ENSMUSG00000038780.15	Smurf1	chr5	-	144817434	144818629	144817434	144817519	144818427	144818629	1657	14,7,9	10,8,14	10,14,14	16,12,14	1057	149	0.969378	1	0.165,0.11,0.083	0.081,0.141,0.124	0.004		160	ENSMUSG00000024622.9
1170	ENSMUSG00000024853.11	Sf3b2	chr19	-	5345068	5345115	5344143	5344404	5345289	5345431	1170	166140235	0,0,0	245193259	1,0,0	196	149	1	1	1.0,1.0,1.0	0.995,1.0,1.0	0.002		1659	ENSMUSG00000037552.18	Plekhg2	chr7	-	28063895	28064057	28063895	28063934	28064009	28064057	1659	2,2,5	13,12,7	1,5,1	19,0,8	224	149	0.845469	1	0.093,0.1,0.322	0.034,1.0,0.077	-0.199		162	ENSMUSG00000024477.5
1171	ENSMUSG00000024855.11	Pacs1	chr19	-	5202301	5202395	5197154	5197235	5202687	5202848	1171	49,20,49	0,0,2	68,55,34	0,0,0	243	149	1	1	1.0,1.0,0.938	1.0,1.0,1.0	-0.021		1662	ENSMUSG00000025650.14	Col7a1	chr9	+	108796838	108797118	108796838	108796874	108797073	108797118	1662	1,0,2	0,3,0	0,0,1	0,0,0	348	149	1	1	1.0,0.0,1.0	NA,NA,1.0	-0.333		164	ENSMUSG00000036452.19
1172	ENSMUSG00000024855.11	Pacs1	chr19	-	5209995	5210121	5206384	5206529	5210745	5210835	1172	16,10,25	0,0,2	24,11,21	0,2,0	275	149	1	1	1.0,1.0,0.871	1.0,0.749,1.0	0.041		1663	ENSMUSG00000033276.19	Stk36	chr1	+	74672665	74673915	74672665	74672813	74673168	74673915	1663	2,5,0	2,1,1	2,1,5	0,1,3	504	149	0.649369	1	0.228,0.596,0.0	1.0,0.228,0.33	-0.245		167	ENSMUSG00000042660.9
1174	ENSMUSG00000024862.17	Klc2	chr19	-	5167221	5167460	5163968	5164199	5168149	5168588	1174	10,3,8	2,0,0	5,6,8	0,0,0	388	149	1	1	0.658,1.0,1.0	1.0,1.0,1.0	-0.114		1667	ENSMUSG00000037336.15	Mfsd2b	chr12	-	4919534	4920623	4919534	4919658	4920498	4920623	1667	2,0,2	5,4,1	0,1,1	3,2,0	989	149	0.954451	1	0.057,0.0,0.232	0.0,0.07,1.0	-0.26		173	ENSMUSG00000037236.17
1175	ENSMUSG00000024862.17	Klc2	chr19	-	5167221	5167497	5163968	5164199	5168149	5168328	1175	7,2,14	2,0,0	11,9,23	0,0,0	425	149	0.861455	1	0.551,1.0,1.0	1.0,1.0,1.0	-0.15		1668	ENSMUSG00000037336.15	Mfsd2b	chr12	-	4919534	4920623	4919534	4919672	4920498	4920623	1668	2,0,2	0,1,0	0,1,1	0,0,0	975	149	1	1	1.0,0.0,1.0	NA,1.0,1.0	-0.333		177	ENSMUSG00000014504.17
1178	ENSMUSG00000024875.6	Yif1a	chr19	+	5142156	5142250	5141568	5141724	5142329	5142529	1178	9,12,18	1,0,0	14,18,13	0,0,0	243	149	1	1	0.847,1.0,1.0	1.0,1.0,1.0	-0.051		1671	ENSMUSG00000031065.15	Cdk16	chrX	+	20562969	20563203	20562969	20563075	20563160	20563203	1671	5,2,9	7,12,15	12,8,4	22,12,13	234	149	0.729517	1	0.313,0.096,0.276	0.258,0.298,0.164	-0.012		178	ENSMUSG00000024260.15
1185	ENSMUSG00000033760.18	Rbm4b	chr19	+	4810040	4810310	4807273	4807697	4812004	4812675	1185	9,5,6	4,1,0	6,10,6	4,0,0	419	149	0.282379	1	0.444,0.64,1.0	0.348,1.0,1.0	-0.088		1681	ENSMUSG00000006215.13	Zbtb17	chr4	+	141192834	141193418	141192834	141192951	141193287	141193418	1681	5,7,12	0,0,0	13,10,7	0,2,0	485	149	1	1	1.0,1.0,1.0	1.0,0.606,1.0	0.131		185	ENSMUSG00000024430.15
1186	ENSMUSG00000033760.18	Rbm4b	chr19	+	4810044	4810310	4807273	4807697	4812004	4812675	1186	7,4,6	4,1,0	6,9,5	4,0,0	415	149	0.263003	1	0.386,0.59,1.0	0.35,1.0,1.0	-0.125		1685	ENSMUSG00000015656.18	Hspa8	chr9	+	40713713	40714187	40713713	40713919	40714091	40714187	1685	254227424	1,0,1	155194361	0,1,1	321	149	1	1	0.992,1.0,0.995	1.0,0.989,0.994	0.001		188	ENSMUSG00000024424.16
1187	ENSMUSG00000033760.18	Rbm4b	chr19	+	4814377	4814599	4812004	4812675	4815371	4815495	1187	0,2,6	14,6,4	3,1,4	6,10,8	371	149	0.729927	1	0.0,0.118,0.376	0.167,0.039,0.167	0.04		1690	ENSMUSG00000025579.15	Gaa	chr11	+	119164800	119165137	119164800	119164966	119165040	119165137	1690	1,1,0	19,24,32	0,0,3	32,31,29	223	149	1	1	0.034,0.027,0.0	0.0,0.0,0.065	-0.001		190	ENSMUSG00000057440.9
1189	ENSMUSG00000054611.18	Kdm2a	chr19	-	4378155	4378287	4376836	4376926	4378980	4379250	1189	79,78,113	2,0,0	106,103,69	0,0,0	281	149	1	1	0.954,1.0,1.0	1.0,1.0,1.0	-0.015		1694	ENSMUSG00000052331.15	Ankrd44	chr1	-	54696774	54698165	54696774	54696858	54698077	54698165	1694	2,2,2	8,6,5	1,7,1	9,6,5	1368	149	0.591716	1	0.027,0.035,0.042	0.012,0.113,0.021	-0.014		191	ENSMUSG00000003559.9
1190	ENSMUSG00000054611.18	Kdm2a	chr19	-	4381213	4381297	4378980	4379250	4392874	4393269	1190	32,34,40	0,0,0	56,43,42	0,1,0	233	149	1	1	1.0,1.0,1.0	1.0,0.965,1.0	0.012		1704	ENSMUSG00000068922.15	Msto1	chr3	-	88817932	88818321	88817932	88818117	88818189	88818321	1704	0,1,6	14,13,17	3,0,2	14,10,14	221	149	0.824988	1	0.0,0.049,0.192	0.126,0.0,0.088	0.009		203	ENSMUSG00000024072.10
1192	ENSMUSG00000054611.18	Kdm2a	chr19	-	4438968	4439085	4412803	4412942	4444819	4444920	1192	1,0,1	31,20,33	2,2,1	36,44,39	266	149	0.496234	1	0.018,0.0,0.017	0.03,0.025,0.014	-0.011		1707	ENSMUSG00000027465.14	Tbc1d20	chr2	+	152149908	152150351	152149908	152150095	152150249	152150351	1707	2,11,1	40,23,47	5,4,2	28,20,32	303	149	0.647725	1	0.024,0.19,0.01	0.081,0.09,0.03	0.008		205	ENSMUSG00000024059.11
1193	ENSMUSG00000054611.18	Kdm2a	chr19	-	4444819	4444920	4412803	4412942	4446338	4446945	1193	33,25,36	0,0,0	42,49,46	0,1,0	250	149	1	1	1.0,1.0,1.0	1.0,0.967,1.0	0.011		1713	ENSMUSG00000035576.14	L3mbtl1	chr2	+	162808465	162809005	162808465	162808580	162808905	162809005	1713	1,0,0	1,0,0	1,0,0	0,1,2	474	149	1	1	0.239,NA,NA	1.0,0.0,0.0	-0.094		207	ENSMUSG00000035842.11
1194	ENSMUSG00000024858.15	Grk2	chr19	-	4338439	4338535	4337850	4338013	4338619	4338686	1194	16,17,25	0,0,0	13,25,27	1,0,0	245	149	1	1	1.0,1.0,1.0	0.888,1.0,1.0	0.037		1719	ENSMUSG00000026269.15	Rnpepl1	chr1	+	92844432	92845468	92844432	92844668	92844868	92845468	1719	2,0,4	5,11,6	2,1,3	8,4,3	349	149	0.686072	1	0.146,0.0,0.222	0.096,0.096,0.299	-0.041		213	ENSMUSG00000038781.8
1195	ENSMUSG00000024858.15	Grk2	chr19	-	4341266	4341358	4340799	4340899	4341617	4341669	1195	74,53,96	3,0,0	62,99,113	0,0,0	241	149	1	1	0.938,1.0,1.0	1.0,1.0,1.0	-0.021		1720	ENSMUSG00000026269.15	Rnpepl1	chr1	+	92844432	92845468	92844432	92844668	92845355	92845468	1720	9,5,8	0,0,0	8,7,7	2,0,0	836	149	0.657818	1	1.0,1.0,1.0	0.416,1.0,1.0	0.195		214	ENSMUSG00000024174.10
1197	ENSMUSG00000005986.17	Ankrd13d	chr19	-	4323563	4323630	4323048	4323130	4330564	4330754	1197	4,1,3	2,0,0	3,5,3	0,0,0	216	149	1	1	0.58,1.0,1.0	1.0,1.0,1.0	-0.14		1721	ENSMUSG00000026269.15	Rnpepl1	chr1	+	92844868	92845468	92844868	92844982	92845355	92845468	1721	9,5,7	16,13,9	6,6,6	11,12,13	522	149	0.779213	1	0.138,0.099,0.182	0.135,0.125,0.116	0.014		217	ENSMUSG00000023993.8
1199	ENSMUSG00000024824.8	Rad9a	chr19	-	4247669	4247779	4247337	4247585	4250270	4250320	1199	5,10,11	0,0,0	16,10,22	0,1,0	259	149	1	1	1.0,1.0,1.0	1.0,0.852,1.0	0.049		1725	ENSMUSG00000027371.11	Fahd2a	chr2	-	127280032	127280489	127280032	127280192	127280429	127280489	1725	2,4,6	2,1,1	9,8,7	9,3,1	386	149	0.648823	1	0.279,0.607,0.698	0.279,0.507,0.73	0.023		221	ENSMUSG00000023977.16
1200	ENSMUSG00000024824.8	Rad9a	chr19	-	4251148	4251246	4250927	4251056	4251327	4251398	1200	1,0,0	6,7,9	2,0,0	8,9,12	247	149	1	1	0.091,0.0,0.0	0.131,0.0,0.0	-0.013		1727	ENSMUSG00000028455.16	Stoml2	chr4	-	43028937	43029358	43028937	43029066	43029278	43029358	1727	14,1,3	130130140	4,12,6	190200204	361	149	0.664711	1	0.043,0.003,0.009	0.009,0.024,0.012	0.003		224	ENSMUSG00000023942.16
1201	ENSMUSG00000040385.8	Ppp1ca	chr19	+	4244770	4244905	4244465	4244689	4244980	4245039	1201	512456693	1,0,0	632659832	0,0,0	284	149	1	1	0.996,1.0,1.0	1.0,1.0,1.0	-0.001		1729	ENSMUSG00000023191.10	P3h3	chr6	-	124827880	124828094	124827880	124827946	124828041	124828094	1729	4,0,0	0,0,0	8,2,4	2,0,0	244	149	1	1	1.0,NA,NA	0.71,1.0,1.0	0.097		225	ENSMUSG00000038954.15
1210	ENSMUSG00000024830.18	Rps6kb2	chr19	-	4207480	4207593	4203989	4207198	4207680	4207788	1210	54,32,49	0,0,1	60,55,54	0,0,2	262	149	1	1	1.0,1.0,0.965	1.0,1.0,0.939	0.009		1730	ENSMUSG00000023191.10	P3h3	chr6	-	124827880	124828094	124827880	124827948	124828041	124828094	1730	4,0,0	6,0,0	8,2,2	3,4,3	242	149	1	1	0.291,NA,NA	0.621,0.235,0.291	-0.091		227	ENSMUSG00000056492.7
1211	ENSMUSG00000024830.18	Rps6kb2	chr19	-	4207680	4207788	4206793	4207198	4207877	4207955	1211	4,11,10	0,1,1	2,6,12	0,2,0	257	149	1	1	1.0,0.864,0.853	1.0,0.635,1.0	0.027		1742	ENSMUSG00000031878.19	Nae1	chr8	-	105254009	105256748	105254009	105254081	105256687	105256748	1742	49,52,43	1,0,0	76,73,67	1,0,0	2755	149	1	1	0.726,1.0,1.0	0.804,1.0,1.0	-0.026		232	ENSMUSG00000038838.16
1213	ENSMUSG00000024830.18	Rps6kb2	chr19	-	4209401	4209459	4209225	4209326	4211066	4211214	1213	22,10,14	1,0,3	20,22,24	3,3,1	207	149	0.352715	1	0.941,1.0,0.771	0.828,0.841,0.945	0.033		1747	ENSMUSG00000026791.15	Slc2a8	chr2	-	32871372	32871895	32871372	32871579	32871732	32871895	1747	1,1,0	4,0,0	1,2,2	1,0,1	302	149	1	1	0.11,1.0,NA	0.33,1.0,0.497	-0.054		237	ENSMUSG00000040482.17
1214	ENSMUSG00000024830.18	Rps6kb2	chr19	-	4209564	4209704	4209401	4209459	4211066	4211214	1214	0,0,0	20,7,10	1,0,0	13,17,18	289	149	1	1	0.0,0.0,0.0	0.038,0.0,0.0	-0.013		1748	ENSMUSG00000015176.12	Nolc1	chr19	+	46067141	46067460	46067141	46067197	46067296	46067460	1748	1,5,10	0,0,1	1,7,7	0,0,0	248	149	1	1	1.0,1.0,0.857	1.0,1.0,1.0	-0.048		238	ENSMUSG00000034254.18
1216	ENSMUSG00000024835.16	Coro1b	chr19	+	4200088	4200218	4199861	4199984	4200438	4200503	1216	96,77,115	0,1,1	131117120	0,0,0	279	149	1	1	1.0,0.976,0.984	1.0,1.0,1.0	-0.013		1749	ENSMUSG00000015176.12	Nolc1	chr19	+	46067141	46067460	46067141	46067197	46067311	46067460	1749	1,6,11	7,7,14	1,7,7	2,12,17	263	149	0.789427	1	0.075,0.327,0.308	0.221,0.248,0.189	0.017		241	ENSMUSG00000042099.17
1217	ENSMUSG00000024835.16	Coro1b	chr19	+	4203225	4203489	4202520	4202578	4203595	4204034	1217	73,69,88	0,0,0	84,74,113	0,0,2	413	149	1	1	1.0,1.0,1.0	1.0,1.0,0.953	0.016		1751	ENSMUSG00000045838.10	Ccdc9b	chr2	-	118590801	118591162	118590801	118590930	118591006	118591162	1751	0,0,0	3,0,0	0,0,4	0,0,4	225	149	1	1	0.0,NA,NA	NA,NA,0.398	-0.398		242	ENSMUSG00000059208.16
1218	ENSMUSG00000024851.15	Pitpnm1	chr19	+	4159825	4159996	4158664	4158867	4160494	4160659	1218	5,7,3	0,0,0	5,9,8	0,0,1	320	149	1	1	1.0,1.0,1.0	1.0,1.0,0.788	0.071		1752	ENSMUSG00000026972.16	Arrdc1	chr2	-	24815767	24816460	24815767	24816206	24816283	24816460	1752	1,1,4	3,3,6	0,0,2	0,3,2	226	149	1	1	0.18,0.18,0.305	NA,0.0,0.397	0.023		243	ENSMUSG00000059208.16
1219	ENSMUSG00000037916.15	Ndufv1	chr19	-	4061101	4061272	4059825	4060009	4061345	4061424	1219	36,35,44	0,0,0	62,52,59	0,0,1	320	149	1	1	1.0,1.0,1.0	1.0,1.0,0.965	0.012		1754	ENSMUSG00000027676.12	Ccdc39	chr3	-	33884173	33884909	33884173	33884306	33884805	33884909	1754	3,9,7	1,0,0	14,11,5	0,0,0	648	149	1	1	0.408,1.0,1.0	1.0,1.0,1.0	-0.197		251	ENSMUSG00000024002.19
1225	ENSMUSG00000024843.16	Chka	chr19	+	3921002	3921062	3914647	3914759	3925734	3925788	1225	0,0,0	3,6,8	0,0,1	1,1,3	209	149	1	1	0.0,0.0,0.0	0.0,0.0,0.192	-0.064		1755	ENSMUSG00000057177.13	Gsk3a	chr7	-	24928889	24929465	24928889	24928997	24929275	24929465	1755	30,21,22	105,91,153	31,27,22	119165122	427	149	0.771433	1	0.091,0.075,0.048	0.083,0.054,0.059	0.006		252	ENSMUSG00000024002.19
1226	ENSMUSG00000024843.16	Chka	chr19	+	3925734	3925788	3914647	3914759	3934471	3934585	1226	3,9,11	3,0,6	4,3,7	2,1,11	203	149	0.177079	1	0.423,1.0,0.574	0.595,0.688,0.318	0.132		1759	ENSMUSG00000020775.14	Mrpl38	chr11	-	116025733	116026151	116025733	116025942	116026016	116026151	1759	3,1,5	35,29,37	3,2,5	46,42,38	223	149	0.883684	1	0.054,0.023,0.083	0.042,0.031,0.081	0.002		253	ENSMUSG00000024002.19
1227	ENSMUSG00000024843.16	Chka	chr19	+	3931997	3932120	3925378	3925788	3934471	3934538	1227	4,11,2	4,9,15	8,3,0	5,4,8	272	149	0.776624	1	0.354,0.401,0.068	0.467,0.291,0.0	0.022		1767	ENSMUSG00000033257.15	Ttll4	chr1	+	74718056	74719622	74718056	74718090	74719512	74719622	1767	420363534	2,0,1	347473474	0,0,0	1571	149	1	1	0.952,1.0,0.981	1.0,1.0,1.0	-0.022		256	ENSMUSG00000042203.9
1228	ENSMUSG00000024843.16	Chka	chr19	+	3932009	3932120	3914647	3914759	3934471	3934585	1228	4,8,0	3,0,6	7,2,0	2,1,11	260	149	0.518707	1	0.433,1.0,0.0	0.667,0.534,0.0	0.077		1768	ENSMUSG00000026790.20	Odf2	chr2	+	29804242	29804522	29804242	29804314	29804405	29804522	1768	0,3,1	16,18,20	2,0,0	27,24,30	240	149	0.811072	1	0.0,0.094,0.03	0.044,0.0,0.0	0.027		259	ENSMUSG00000024013.16
1233	ENSMUSG00000024908.16	Ppp6r3	chr19	-	3528277	3528364	3523768	3523815	3534830	3534852	1233	25,26,46	3,0,0	22,31,51	0,3,0	236	149	0.81619	1	0.84,1.0,1.0	1.0,0.867,1.0	-0.009		1771	ENSMUSG00000019927.7	Ube2d1	chr10	-	71095571	71097945	71095571	71095649	71097913	71097945	1771	67,59,48	89,96,103	67,91,47	87109123	2413	149	0.70722	1	0.044,0.037,0.028	0.045,0.049,0.023	-0.003		260	ENSMUSG00000024012.19
1234	ENSMUSG00000024908.16	Ppp6r3	chr19	-	3528277	3528364	3523768	3523866	3534830	3534852	1234	33,47,77	1,6,7	27,39,64	16,1,9	236	149	0.131565	1	0.954,0.832,0.874	0.516,0.961,0.818	0.122		1776	ENSMUSG00000005514.15	Por	chr5	+	135763236	135763560	135763236	135763382	135763474	135763560	1776	1,0,1	11,12,19	1,0,0	6,11,11	241	149	1	1	0.053,0.0,0.032	0.093,0.0,0.0	-0.003		261	ENSMUSG00000024011.18
1235	ENSMUSG00000024908.16	Ppp6r3	chr19	-	3534830	3534916	3527775	3528364	3536975	3537091	1235	62,71,119	0,1,0	46,62,87	0,1,0	235	149	1	1	1.0,0.978,1.0	1.0,0.975,1.0	0.001		1777	ENSMUSG00000026955.14	Sapcd2	chr2	+	25265979	25266286	25265979	25266087	25266175	25266286	1777	1,6,6	39,28,60	4,4,6	64,44,57	237	149	0.809195	1	0.016,0.119,0.059	0.038,0.054,0.062	0.013		267	ENSMUSG00000024187.16
1236	ENSMUSG00000024908.16	Ppp6r3	chr19	-	3557241	3557355	3546521	3546651	3561928	3562041	1236	65,54,56	0,0,1	49,63,81	0,0,0	263	149	1	1	1.0,1.0,0.969	1.0,1.0,1.0	-0.01		1795	ENSMUSG00000097195.11	Snhg5	chr9	-	88403702	88404434	88403702	88404028	88404359	88404434	1795	78,55,72	27,29,30	53,91,84	39,25,31	480	149	0.993939	1	0.473,0.371,0.427	0.297,0.53,0.457	-0.004		269	ENSMUSG00000024181.10
1237	ENSMUSG00000024908.16	Ppp6r3	chr19	-	3568244	3568382	3564653	3564719	3571733	3571747	1237	97,75,122	3,2,2	88142139	0,4,0	287	149	0.126443	1	0.944,0.951,0.969	1.0,0.949,1.0	-0.028		1797	ENSMUSG00000097195.11	Snhg5	chr9	-	88403702	88404941	88403702	88404434	88404536	88404941	1797	17,12,24	29,30,40	12,21,17	36,30,29	251	149	0.92771	1	0.258,0.192,0.263	0.165,0.294,0.258	-0.001		271	ENSMUSG00000024177.10
1238	ENSMUSG00000024908.16	Ppp6r3	chr19	-	3568244	3568382	3564653	3564719	3576701	3576929	1238	37,25,38	0,0,0	47,64,59	0,0,1	287	149	1	1	1.0,1.0,1.0	1.0,1.0,0.968	0.011		1798	ENSMUSG00000097195.11	Snhg5	chr9	-	88404536	88404941	88404536	88404639	88404903	88404941	1798	102,81,131	0,0,2	71,108,89	0,0,1	413	149	1	1	1.0,1.0,0.959	1.0,1.0,0.97	-0.004		272	ENSMUSG00000037326.11
1239	ENSMUSG00000024908.16	Ppp6r3	chr19	-	3571733	3571920	3564653	3564719	3576701	3576929	1239	70,65,91	0,0,0	69,110,93	0,0,1	336	149	1	1	1.0,1.0,1.0	1.0,1.0,0.976	0.008		1804	ENSMUSG00000037447.17	Arid5a	chr1	+	36356284	36356743	36356284	36356405	36356690	36356743	1804	1,0,0	0,0,1	1,0,0	0,0,0	434	149	1	1	1.0,NA,0.0	1.0,NA,NA	-0.5		273	ENSMUSG00000025728.17
1240	ENSMUSG00000024908.16	Ppp6r3	chr19	-	3571733	3571920	3568244	3568382	3576701	3576929	1240	128113173	0,0,1	110182170	0,0,0	336	149	1	1	1.0,1.0,0.987	1.0,1.0,1.0	-0.004		1805	ENSMUSG00000037447.17	Arid5a	chr1	+	36355289	36357262	36355289	36355408	36357164	36357262	1805	3,1,2	0,1,0	2,6,1	0,0,0	1905	149	1	1	1.0,0.073,1.0	1.0,1.0,1.0	-0.309		279	ENSMUSG00000024163.18
1241	ENSMUSG00000024908.16	Ppp6r3	chr19	-	3577570	3577675	3576760	3576934	3594107	3594255	1241	1,4,0	34,33,49	0,1,3	38,38,49	254	149	0.720038	1	0.017,0.066,0.0	0.0,0.015,0.035	0.011		1812	ENSMUSG00000027584.18	Oprl1	chr2	+	181360169	181361165	181360169	181360525	181360606	181361165	1812	1,0,0	1,4,1	0,0,0	0,0,1	230	149	1	1	0.393,0.0,0.0	NA,NA,0.0	0.131		282	ENSMUSG00000052752.16
1245	ENSMUSG00000024831.15	Ighmbp2	chr19	-	3317241	3317336	3316335	3316459	3318297	3318416	1245	4,1,12	2,0,0	10,5,4	0,0,2	244	149	1	1	0.55,1.0,1.0	1.0,1.0,0.55	0		1814	ENSMUSG00000019518.12	Ap4m1	chr5	+	138170610	138171155	138170610	138170699	138171048	138171155	1814	21,29,17	17,4,17	16,23,26	8,13,13	498	149	0.939846	1	0.27,0.684,0.23	0.374,0.346,0.374	0.03		283	ENSMUSG00000024142.16
1246	ENSMUSG00000024831.15	Ighmbp2	chr19	-	3329532	3329630	3326755	3326919	3329806	3329996	1246	10,7,7	3,0,0	12,2,17	0,1,0	247	149	0.594887	1	0.668,1.0,1.0	1.0,0.547,1.0	0.04		1815	ENSMUSG00000019518.12	Ap4m1	chr5	+	138170610	138171155	138170610	138170741	138171048	138171155	1815	20,29,17	0,1,0	16,23,25	1,0,0	456	149	1	1	1.0,0.905,1.0	0.839,1.0,1.0	0.022		284	ENSMUSG00000024136.15
1249	ENSMUSG00000024614.8	Tmx3	chr18	+	90537228	90537274	90535517	90535641	90539080	90539161	1249	5,14,14	2,2,0	13,13,10	1,0,0	195	149	0.198954	1	0.656,0.842,1.0	0.909,1.0,1.0	-0.137		1817	ENSMUSG00000019518.12	Ap4m1	chr5	+	138176184	138176442	138176184	138176235	138176330	138176442	1817	4,13,10	1,2,4	9,6,4	0,4,2	244	149	0.815006	1	0.71,0.799,0.604	1.0,0.478,0.55	0.028		304	ENSMUSG00000080316.12
1250	ENSMUSG00000024614.8	Tmx3	chr18	+	90551344	90551398	90551106	90551164	90552505	90552562	1250	14,8,26	0,0,0	28,28,27	1,0,0	203	149	1	1	1.0,1.0,1.0	0.954,1.0,1.0	0.015		1823	ENSMUSG00000022556.12	Hsf1	chr15	+	76384330	76384536	76384330	76384396	76384466	76384536	1823	6,10,7	16,2,8	18,13,6	7,15,13	219	149	0.988682	1	0.203,0.773,0.373	0.636,0.371,0.239	0.034		308	ENSMUSG00000006818.6
1251	ENSMUSG00000024614.8	Tmx3	chr18	+	90551714	90551816	90551344	90551398	90552505	90552562	1251	0,0,1	12,7,22	0,0,0	26,28,26	251	149	1	1	0.0,0.0,0.026	0.0,0.0,0.0	0.009		1825	ENSMUSG00000026127.14	Imp4	chr1	+	34482849	34483172	34482849	34483004	34483077	34483172	1825	2,9,0	78,64,132	3,5,5	94105138	222	149	0.98469	1	0.017,0.086,0.0	0.021,0.031,0.024	0.009		310	ENSMUSG00000023861.18
1263	ENSMUSG00000047992.12	Dipk1c	chr18	+	84742580	84742720	84738366	84738486	84748154	84748349	1263	0,0,0	1,0,11	1,4,1	11,0,0	289	149	1	1	0.0,NA,0.0	0.045,1.0,1.0	-0.682		1827	ENSMUSG00000028059.17	Arhgef2	chr3	+	88540219	88540674	88540219	88540349	88540564	88540674	1827	6,6,21	5,5,14	25,3,8	11,5,8	364	149	0.997043	1	0.329,0.329,0.38	0.482,0.197,0.29	0.023		311	ENSMUSG00000073471.4
1266	ENSMUSG00000047992.12	Dipk1c	chr18	+	84748154	84748814	84738143	84738486	84754936	84755101	1266	21,18,41	0,0,0	43,30,25	0,0,1	809	149	1	1	1.0,1.0,1.0	1.0,1.0,0.822	0.059		1828	ENSMUSG00000028059.17	Arhgef2	chr3	+	88540219	88540674	88540219	88540349	88540601	88540674	1828	6,6,22	0,1,0	25,3,8	0,0,0	401	149	1	1	1.0,0.69,1.0	1.0,1.0,1.0	-0.103		314	ENSMUSG00000038141.12
1268	ENSMUSG00000047992.12	Dipk1c	chr18	+	84754936	84755101	84748154	84748814	84757493	84757533	1268	2,5,15	0,0,0	4,8,4	0,1,2	314	149	0.540604	1	1.0,1.0,1.0	1.0,0.792,0.487	0.24		1830	ENSMUSG00000031555.16	Adam9	chr8	-	25452875	25453104	25452875	25452901	25452954	25453104	1830	11,23,49	0,0,0	58,47,42	0,1,0	202	149	1	1	1.0,1.0,1.0	1.0,0.972,1.0	0.009		319	ENSMUSG00000040785.20
1269	ENSMUSG00000048410.18	Zfp407	chr18	-	84576451	84581171	84570994	84571109	84607562	84607629	1269	338278411	0,1,0	331372353	0,0,0	4869	149	1	1	1.0,0.895,1.0	1.0,1.0,1.0	-0.035		1837	ENSMUSG00000026721.17	Rabgap1l	chr1	-	160568321	160568501	160568321	160568369	160568453	160568501	1837	6,0,2	0,0,0	5,4,1	0,1,0	233	149	1	1	1.0,NA,1.0	1.0,0.719,1.0	0.094		321	ENSMUSG00000040785.20
1272	ENSMUSG00000031216.14	Stard8	chrX	+	98106970	98107052	98104333	98104405	98107999	98108063	1272	5,4,2	0,0,0	6,0,12	1,0,0	231	149	1	1	1.0,1.0,1.0	0.795,NA,1.0	0.103		1841	ENSMUSG00000090137.9	Uba52	chr8	-	70961945	70962284	70961945	70962032	70962170	70962284	1841	11,10,12	576511897	16,13,11	761789975	287	149	1	1	0.01,0.01,0.007	0.011,0.008,0.006	0.001		327	ENSMUSG00000022983.17
1275	ENSMUSG00000034006.18	Slc66a2	chr18	+	80315676	80315730	80306634	80306768	80326490	80326707	1275	1,1,1	3,0,1	0,2,0	0,0,0	203	149	1	1	0.197,1.0,0.423	NA,1.0,NA	-0.46		1843	ENSMUSG00000043716.14	Rpl7	chr1	-	16172915	16173558	16172915	16173053	16173391	16173558	1843	29,11,35	167014942371	24,32,34	242525602830	487	149	1	1	0.005,0.002,0.004	0.003,0.004,0.004	0		328	ENSMUSG00000052105.18
1277	ENSMUSG00000024571.16	Naa12	chr18	+	80253276	80253345	80250368	80250558	80254627	80255938	1277	33,29,78	0,1,2	48,53,57	0,0,0	218	149	0.511495	1	1.0,0.952,0.964	1.0,1.0,1.0	-0.028		1844	ENSMUSG00000043716.14	Rpl7	chr1	-	16173391	16173908	16173391	16173558	16173733	16173908	1844	4,5,5	466394642	7,7,9	526631770	324	149	1	1	0.004,0.006,0.004	0.006,0.005,0.005	-0.001		329	ENSMUSG00000052105.18
1278	ENSMUSG00000053950.11	Adnp2	chr18	-	80180698	80180788	80169525	80174209	80185863	80185984	1278	43,49,49	0,1,0	59,60,76	0,0,0	239	149	1	1	1.0,0.968,1.0	1.0,1.0,1.0	-0.011		1845	ENSMUSG00000004267.17	Eno2	chr6	-	124739615	124740169	124739615	124739724	124739967	124740169	1845	3,0,2	0,0,0	3,0,0	0,0,3	392	149	1	1	1.0,NA,1.0	1.0,NA,0.0	0.5		330	ENSMUSG00000022641.16
1280	ENSMUSG00000039840.9	Epg5	chr18	+	78028255	78028422	78026685	78026805	78029600	78029822	1280	1,7,2	0,0,1	6,12,11	0,0,0	316	149	1	1	1.0,1.0,0.485	1.0,1.0,1.0	-0.172		1846	ENSMUSG00000017405.15	Nek8	chr11	-	78061438	78062124	78061438	78061620	78061698	78062124	1846	0,1,3	0,1,0	1,2,0	0,1,0	227	149	1	1	NA,0.396,1.0	1.0,0.568,NA	-0.086		332	ENSMUSG00000022793.18
1281	ENSMUSG00000025428.16	Atp5a1	chr18	+	77868911	77869056	77868684	77868792	77869498	77869589	1281	769668959	0,0,1	839926981	0,0,0	294	149	1	1	1.0,1.0,0.998	1.0,1.0,1.0	-0.001		1847	ENSMUSG00000017405.15	Nek8	chr11	-	78061698	78062124	78061698	78061778	78061915	78062124	1847	0,0,6	0,0,2	0,6,0	0,5,0	286	149	1	1	NA,NA,0.61	NA,0.385,NA	0.225		333	ENSMUSG00000034206.16
1282	ENSMUSG00000047466.11	8030462N17Rik	chr18	-	77740824	77740992	77730763	77730890	77761595	77762380	1282	5,5,2	7,2,3	3,4,16	7,2,7	317	149	0.594499	1	0.251,0.54,0.239	0.168,0.485,0.518	-0.047		1852	ENSMUSG00000003233.13	Dvl3	chr16	+	20341005	20342281	20341005	20341075	20342159	20342281	1852	18,17,14	24,28,49	17,19,21	44,45,42	1233	149	0.688519	1	0.083,0.068,0.033	0.045,0.049,0.057	0.011		334	ENSMUSG00000071562.7
1284	ENSMUSG00000025423.17	Pias2	chr18	+	77193500	77193585	77184944	77185419	77207607	77207658	1284	22,14,22	0,1,0	26,42,35	0,0,0	234	149	1	1	1.0,0.899,1.0	1.0,1.0,1.0	-0.034		1853	ENSMUSG00000030330.16	Ing4	chr6	+	125024444	125025200	125024444	125024550	125024755	125025200	1853	13,20,20	24,33,37	23,14,13	25,25,40	354	149	0.944819	1	0.186,0.203,0.185	0.279,0.191,0.12	-0.005		336	ENSMUSG00000022906.16
1286	ENSMUSG00000025423.17	Pias2	chr18	+	77216651	77216757	77214552	77214687	77217745	77217819	1286	35,41,41	0,0,0	47,42,59	0,0,1	255	149	1	1	1.0,1.0,1.0	1.0,1.0,0.972	0.009		1856	ENSMUSG00000062175.14	Tgif2	chr2	+	156695048	156697490	156695048	156695148	156695265	156697490	1856	83,54,106	2,5,3	74,105,75	4,2,2	266	149	0.570426	1	0.959,0.858,0.952	0.912,0.967,0.955	-0.022		337	ENSMUSG00000022962.16
1293	ENSMUSG00000025421.16	Hdhd2	chr18	+	77052746	77052963	77044534	77044619	77054839	77054903	1293	45,51,57	0,0,0	76,51,90	0,0,1	366	149	1	1	1.0,1.0,1.0	1.0,1.0,0.973	0.009		1860	ENSMUSG00000052133.17	Sema5b	chr16	+	35480292	35480753	35480292	35480440	35480527	35480753	1860	0,1,0	15,13,17	1,0,0	8,6,8	236	149	1	1	0.0,0.046,0.0	0.073,0.0,0.0	-0.009		339	ENSMUSG00000022817.16
1295	ENSMUSG00000024563.17	Smad2	chr18	+	76419930	76420020	76395510	76395798	76420998	76421192	1295	22,11,32	2,1,2	29,43,46	0,2,3	239	149	0.609693	1	0.873,0.873,0.909	1.0,0.931,0.905	-0.06		1868	ENSMUSG00000001240.14	Ramp2	chr11	+	101138411	101139076	101138411	101138514	101138636	101139076	1868	3,1,2	11,8,11	3,5,1	19,10,14	271	149	0.578553	1	0.13,0.064,0.091	0.08,0.216,0.038	-0.016		340	ENSMUSG00000035578.17
1298	ENSMUSG00000025665.17	Rps6ka6	chrX	-	110300783	110300915	110297888	110299608	110308277	110308395	1298	66,82,121	0,0,0	125100130	0,0,1	281	149	1	1	1.0,1.0,1.0	1.0,1.0,0.986	0.005		1870	ENSMUSG00000026437.12	Cdk18	chr1	-	132044184	132044439	132044184	132044227	132044333	132044439	1870	0,0,2	0,0,0	0,0,0	10,1,2	255	149	1	1	NA,NA,1.0	0.0,0.0,0.0	1		342	ENSMUSG00000022801.14
1299	ENSMUSG00000025665.17	Rps6ka6	chrX	-	110355927	110355987	110348849	110348966	110372546	110372802	1299	6,8,5	0,0,3	2,7,4	0,0,0	209	149	0.371524	1	1.0,1.0,0.543	1.0,1.0,1.0	-0.152		1872	ENSMUSG00000048930.13	Tada3	chr6	-	113353852	113354700	113353852	113353906	113354276	113354700	1872	7,9,7	6,3,6	12,9,10	7,11,7	519	149	0.716619	1	0.251,0.463,0.251	0.33,0.19,0.291	0.051		344	ENSMUSG00000022772.13
1300	ENSMUSG00000025665.17	Rps6ka6	chrX	-	110359988	110360051	110355927	110355987	110372546	110372740	1300	27,41,69	0,0,1	52,19,57	0,0,1	212	149	1	1	1.0,1.0,0.98	1.0,1.0,0.976	0.001		1873	ENSMUSG00000024104.12	Washc2	chr6	+	116231050	116232129	116231050	116231179	116232009	116232129	1873	8,19,11	0,0,0	16,13,8	0,0,1	979	149	1	1	1.0,1.0,1.0	1.0,1.0,0.549	0.15		345	ENSMUSG00000022770.18
1303	ENSMUSG00000035765.11	Dym	chr18	+	75189700	75189834	75188351	75188445	75196171	75196185	1303	22,11,23	0,0,1	17,31,19	0,0,0	283	149	1	1	1.0,1.0,0.924	1.0,1.0,1.0	-0.025		1874	ENSMUSG00000063531.8	Sema3e	chr5	+	14275566	14276544	14275566	14275709	14276429	14276544	1874	0,1,1	0,0,1	1,3,4	0,0,0	869	149	1	1	NA,1.0,0.146	1.0,1.0,1.0	-0.427		346	ENSMUSG00000022770.18
1304	ENSMUSG00000035765.11	Dym	chr18	+	75196171	75196244	75189700	75189834	75213273	75213399	1304	19,14,18	0,0,0	21,11,26	1,0,0	222	149	1	1	1.0,1.0,1.0	0.934,1.0,1.0	0.022		1875	ENSMUSG00000029534.18	St7	chr6	+	17850355	17852411	17850355	17850424	17852256	17852411	1875	9,21,18	0,0,1	21,19,12	0,0,0	1981	149	1	1	1.0,1.0,0.575	1.0,1.0,1.0	-0.142		348	ENSMUSG00000022537.19
1305	ENSMUSG00000035765.11	Dym	chr18	+	75363060	75363243	75332233	75332336	75376355	75376469	1305	39,21,43	1,0,0	28,46,54	0,0,1	332	149	1	1	0.946,1.0,1.0	1.0,1.0,0.96	-0.005		1876	ENSMUSG00000007458.15	M6pr	chr6	+	122290217	122292125	122290217	122290384	122292015	122292125	1876	36,42,56	36,37,56	58,59,63	35,58,68	1780	149	0.634999	1	0.077,0.087,0.077	0.122,0.078,0.072	-0.01		349	ENSMUSG00000038084.17
1306	ENSMUSG00000062328.9	Rpl17	chr18	+	75134420	75134461	75134261	75134314	75134736	75134871	1306	126109146	1,0,0	153138192	0,0,0	190	149	1	1	0.99,1.0,1.0	1.0,1.0,1.0	-0.003		1878	ENSMUSG00000030741.16	Spns1	chr7	-	125972941	125974375	125972941	125973008	125974238	125974375	1878	33,30,39	0,0,1	29,28,27	0,0,0	1379	149	1	1	1.0,1.0,0.808	1.0,1.0,1.0	-0.064		353	ENSMUSG00000022510.15
1311	ENSMUSG00000024558.13	Mapk4	chr18	-	74070200	74070345	74068076	74068238	74102961	74104347	1311	3,2,4	0,0,0	3,2,3	1,0,0	294	149	1	1	1.0,1.0,1.0	0.603,1.0,1.0	0.132		1880	ENSMUSG00000054252.19	Fgfr3	chr5	+	33887487	33889605	33887487	33887678	33889460	33889605	1880	23,25,11	2,1,1	28,20,7	2,3,0	1931	149	0.795952	1	0.47,0.659,0.459	0.519,0.34,1.0	-0.09		356	ENSMUSG00000022884.17
1312	ENSMUSG00000024556.5	Me2	chr18	-	73918765	73918908	73914112	73914215	73921424	73921539	1312	93,93,123	0,1,0	198131131	0,0,0	292	149	1	1	1.0,0.979,1.0	1.0,1.0,1.0	-0.007		1881	ENSMUSG00000054252.19	Fgfr3	chr5	+	33891690	33891967	33891690	33891813	33891896	33891967	1881	1,0,1	0,8,5	0,0,0	6,1,7	232	149	1	1	1.0,0.0,0.114	0.0,0.0,0.0	0.371		357	ENSMUSG00000022884.17
1313	ENSMUSG00000024556.5	Me2	chr18	-	73934799	73934933	73930732	73931049	73938122	73938240	1313	67,88,129	0,2,0	155127152	0,0,0	283	149	1	1	1.0,0.959,1.0	1.0,1.0,1.0	-0.014		1882	ENSMUSG00000007097.15	Atp1a2	chr1	-	172106101	172106561	172106101	172106247	172106437	172106561	1882	0,0,0	0,0,2	1,0,2	0,0,0	339	149	1	1	NA,NA,0.0	1.0,NA,1.0	-1		360	ENSMUSG00000003235.14
1314	ENSMUSG00000117984.2	Gm31819	chr18	-	72835786	72835992	72823365	72825528	72848097	72848292	1314	0,0,1	0,1,0	0,0,0	1,0,0	355	149	1	1	NA,0.0,1.0	0.0,NA,NA	0.5		1883	ENSMUSG00000036067.13	Slc2a6	chr2	-	26913099	26913655	26913099	26913261	26913546	26913655	1883	5,0,5	0,0,0	3,0,1	0,0,2	434	149	1	1	1.0,NA,1.0	1.0,NA,0.147	0.426		364	ENSMUSG00000022702.17
1315	ENSMUSG00000024513.17	Mbd2	chr18	+	70727346	70727470	70726273	70726411	70749635	70749726	1315	0,0,3	3,8,9	0,0,0	5,1,12	273	149	0.787371	1	0.0,0.0,0.154	0.0,0.0,0.0	0.051		1884	ENSMUSG00000033952.15	Aspm	chr1	+	139398175	139398495	139398175	139398321	139398409	139398495	1884	0,1,4	42,34,55	3,0,1	50,28,51	237	149	0.752161	1	0.0,0.018,0.044	0.036,0.0,0.012	0.005		365	ENSMUSG00000022702.17
1317	ENSMUSG00000079608.11	Stard6	chr18	+	70616482	70616609	70609452	70609502	70629184	70629302	1317	0,0,0	0,0,1	3,3,6	0,0,0	276	149	1	1	NA,NA,0.0	1.0,1.0,1.0	-1		1887	ENSMUSG00000010048.11	Ifrd2	chr9	+	107467496	107467861	107467496	107467621	107467703	107467861	1887	0,4,3	8,3,17	3,6,1	18,14,12	231	149	0.868166	1	0.0,0.462,0.102	0.097,0.217,0.051	0.066		366	ENSMUSG00000005262.14
1319	ENSMUSG00000044906.7	4930503L19Rik	chr18	-	70591387	70591519	70589544	70589615	70597032	70597135	1319	12,5,10	0,0,1	17,11,9	0,0,0	281	149	1	1	1.0,1.0,0.841	1.0,1.0,1.0	-0.053		1892	ENSMUSG00000074797.12	Itpa	chr2	+	130513320	130513540	130513320	130513378	130513475	130513540	1892	2,6,2	47,48,82	6,2,0	24,36,60	246	149	1	1	0.025,0.07,0.015	0.132,0.033,0.0	-0.018		369	ENSMUSG00000003528.16
1320	ENSMUSG00000044906.7	4930503L19Rik	chr18	-	70597032	70597135	70585283	70586459	70600401	70600527	1320	2,10,9	1,3,0	3,8,4	1,1,0	252	149	0.238056	1	0.542,0.663,1.0	0.639,0.825,1.0	-0.086		1894	ENSMUSG00000028402.19	Mpdz	chr4	-	81201569	81202936	81201569	81201674	81202813	81202936	1894	21,22,22	38,38,39	25,24,35	30,59,49	1288	149	0.686354	1	0.06,0.063,0.061	0.088,0.045,0.076	-0.008		370	ENSMUSG00000012114.18
1322	ENSMUSG00000024511.16	Rab27b	chr18	-	70182508	70182679	70129139	70129311	70186196	70186659	1322	0,0,0	3,1,4	0,2,0	10,1,1	320	149	0.856668	1	0.0,0.0,0.0	0.0,0.482,0.0	-0.161		1895	ENSMUSG00000001750.17	Tcirg1	chr19	-	3948547	3948875	3948547	3948638	3948717	3948875	1895	0,0,1	4,1,4	0,0,0	3,8,1	228	149	1	1	0.0,0.0,0.14	0.0,0.0,0.0	0.047		371	ENSMUSG00000005899.15
1323	ENSMUSG00000038903.14	Ccdc68	chr18	+	70089052	70089135	70080121	70080250	70093471	70093577	1323	2,2,4	0,0,1	12,6,8	0,0,0	232	149	1	1	1.0,1.0,0.72	1.0,1.0,1.0	-0.093		1896	ENSMUSG00000001750.17	Tcirg1	chr19	-	3951890	3952556	3951890	3952035	3952343	3952556	1896	2,8,4	1,0,0	5,4,0	0,0,0	457	149	1	1	0.395,1.0,1.0	1.0,1.0,NA	-0.202		373	ENSMUSG00000041720.15
1324	ENSMUSG00000038903.14	Ccdc68	chr18	+	70093471	70093577	70080121	70080250	70094530	70094614	1324	2,0,1	0,0,1	2,0,0	0,0,0	255	149	1	1	1.0,NA,0.369	1.0,NA,NA	-0.316		1899	ENSMUSG00000041777.13	Cir1	chr2	-	73136233	73136685	73136233	73136282	73136620	73136685	1899	0,4,3	0,0,3	5,1,2	1,3,3	487	149	1	1	NA,1.0,0.234	0.605,0.093,0.169	0.328		375	ENSMUSG00000022792.17
1326	ENSMUSG00000009535.14	Rnmt	chr18	+	68436502	68436566	68433462	68433496	68438850	68439270	1326	0,0,0	2,1,3	0,1,0	5,2,10	213	149	1	1	0.0,0.0,0.0	0.0,0.259,0.0	-0.086		1900	ENSMUSG00000015950.14	Ncf1	chr5	-	134249113	134251029	134249113	134250722	134250841	134251029	1900	0,0,1	1,0,0	0,1,0	0,0,0	268	149	1	1	0.0,NA,1.0	NA,1.0,NA	-0.5		376	ENSMUSG00000022672.9
1328	ENSMUSG00000024542.10	Cep192	chr18	+	67937435	67937564	67936058	67936226	67940327	67940476	1328	24,24,31	8,3,0	43,29,34	6,0,1	278	149	0.184527	1	0.617,0.811,1.0	0.793,1.0,0.948	-0.104		1901	ENSMUSG00000015950.14	Ncf1	chr5	-	134249113	134251029	134249113	134250722	134250883	134251029	1901	0,0,1	0,5,0	0,2,0	0,0,0	310	149	1	1	NA,0.0,1.0	NA,1.0,NA	-0.5		377	ENSMUSG00000060657.9
1329	ENSMUSG00000024542.10	Cep192	chr18	+	67940327	67940476	67937435	67937564	67943146	67943199	1329	66,44,54	2,0,0	82,84,63	0,0,0	298	149	1	1	0.943,1.0,1.0	1.0,1.0,1.0	-0.019		1902	ENSMUSG00000005917.16	Otx1	chr11	-	21948369	21951189	21948369	21948521	21951121	21951189	1902	114,84,87	0,0,0	106,84,110	0,0,2	2749	149	1	1	1.0,1.0,1.0	1.0,1.0,0.749	0.084		378	ENSMUSG00000037965.16
1330	ENSMUSG00000024542.10	Cep192	chr18	+	67956345	67956410	67953359	67953503	67957652	67957862	1330	37,23,36	0,1,0	36,30,44	0,0,3	214	149	0.957738	1	1.0,0.941,1.0	1.0,1.0,0.911	0.01		1906	ENSMUSG00000017756.10	Slc12a7	chr13	+	73936683	73938899	73936683	73936830	73938768	73938899	1906	24,43,28	0,0,0	33,41,25	1,0,0	2087	149	1	1	1.0,1.0,1.0	0.702,1.0,1.0	0.099		380	ENSMUSG00000022710.18
1331	ENSMUSG00000024542.10	Cep192	chr18	+	67983182	67983308	67980422	67980653	67983480	67983624	1331	51,36,41	0,0,1	59,53,41	0,0,0	275	149	1	1	1.0,1.0,0.957	1.0,1.0,1.0	-0.014		1910	ENSMUSG00000039354.17	Smarcal1	chr1	+	72650453	72652183	72650453	72650594	72651967	72652183	1910	16,8,10	2,12,9	9,13,15	5,9,4	1522	149	0.605489	1	0.439,0.061,0.098	0.15,0.124,0.269	0.018		381	ENSMUSG00000096215.9
1332	ENSMUSG00000024542.10	Cep192	chr18	+	68001511	68001617	67999501	67999625	68002400	68002608	1332	87,55,83	0,0,0	81,115,96	1,0,0	255	149	1	1	1.0,1.0,1.0	0.979,1.0,1.0	0.007		1911	ENSMUSG00000020776.19	Fbf1	chr11	-	116038729	116039054	116038729	116038869	116038946	116039054	1911	13,6,6	24,31,26	16,7,7	28,34,38	226	149	0.981593	1	0.263,0.113,0.132	0.274,0.12,0.108	0.002		382	ENSMUSG00000022515.7
1333	ENSMUSG00000079614.5	Seh1l	chr18	+	67912274	67912325	67907945	67908190	67916984	67917131	1333	34,22,49	0,0,1	45,39,43	0,0,0	200	149	1	1	1.0,1.0,0.973	1.0,1.0,1.0	-0.009		1913	ENSMUSG00000023175.16	Bsg	chr10	+	79546471	79546754	79546471	79546558	79546673	79546754	1913	308249476	0,0,0	731563747	1,2,0	264	149	1	1	1.0,1.0,1.0	0.998,0.994,1.0	0.003		383	ENSMUSG00000022855.10
1334	ENSMUSG00000079614.5	Seh1l	chr18	+	67916984	67917131	67912274	67912325	67917956	67918168	1334	61,31,80	0,1,0	66,52,83	0,0,0	296	149	1	1	1.0,0.94,1.0	1.0,1.0,1.0	-0.02		1916	ENSMUSG00000040189.19	Odad1	chr7	+	45591482	45592084	45591482	45591617	45592001	45592084	1916	0,1,6	0,1,1	1,6,0	4,0,0	533	149	1	1	NA,0.218,0.626	0.065,1.0,NA	-0.11		387	ENSMUSG00000060992.10
1343	ENSMUSG00000042439.14	Zfp532	chr18	+	65715797	65715880	65712982	65713581	65715967	65716077	1343	1,0,1	0,0,0	5,0,3	0,0,3	232	149	1	1	1.0,NA,1.0	1.0,NA,0.391	0.304		1917	ENSMUSG00000028107.15	Tars2	chr3	-	95655798	95657729	95655798	95655866	95657650	95657729	1917	27,45,40	2,0,1	33,46,46	0,0,0	1933	149	0.570217	1	0.51,1.0,0.755	1.0,1.0,1.0	-0.245		388	ENSMUSG00000001289.13
1347	ENSMUSG00000042439.14	Zfp532	chr18	+	65715797	65715880	65714157	65714219	65756054	65756442	1347	0,1,0	0,0,1	0,0,1	6,0,0	232	149	1	1	NA,1.0,0.0	0.0,NA,1.0	0		1920	ENSMUSG00000009995.18	Taz	chrX	+	73331783	73332119	73331783	73331825	73332053	73332119	1920	7,6,10	0,0,1	10,6,9	0,1,0	377	149	1	1	1.0,1.0,0.798	1.0,0.703,1.0	0.032		389	ENSMUSG00000046897.18
1351	ENSMUSG00000042439.14	Zfp532	chr18	+	65715967	65716077	65713300	65713581	65756054	65756288	1351	28,36,25	0,0,0	39,54,45	1,0,1	259	149	1	1	1.0,1.0,1.0	0.957,1.0,0.963	0.027		1921	ENSMUSG00000009995.18	Taz	chrX	+	73331783	73332119	73331783	73331825	73332056	73332119	1921	7,6,10	2,10,11	10,6,10	6,7,8	380	149	0.778659	1	0.578,0.19,0.263	0.395,0.252,0.329	0.018		390	ENSMUSG00000046897.18
1353	ENSMUSG00000042439.14	Zfp532	chr18	+	65715967	65716077	65714812	65714969	65756054	65756288	1353	30,44,27	0,1,0	45,54,48	0,0,1	259	149	1	1	1.0,0.962,1.0	1.0,1.0,0.965	-0.001		1923	ENSMUSG00000035772.12	Mrps2	chr2	+	28358254	28358962	28358254	28358371	28358832	28358962	1923	4,15,7	16,24,36	4,16,3	28,22,23	610	149	0.820271	1	0.058,0.132,0.045	0.034,0.151,0.031	0.006		395	ENSMUSG00000037353.10
1358	ENSMUSG00000042439.14	Zfp532	chr18	+	65771820	65772002	65756054	65758405	65777263	65777440	1358	64,72,63	1,0,0	92,56,71	0,5,0	331	149	0.320285	1	0.966,1.0,1.0	1.0,0.834,1.0	0.044		1924	ENSMUSG00000010608.16	Rbm25	chr12	+	83707368	83711033	83707368	83707452	83710752	83711033	1924	288282219	5,6,8	552380296	5,11,16	3449	149	0.824869	1	0.713,0.67,0.542	0.827,0.599,0.444	0.018		397	ENSMUSG00000023015.15
1359	ENSMUSG00000042439.14	Zfp532	chr18	+	65771820	65772002	65756054	65758405	65815965	65816078	1359	34,39,29	9,4,9	57,43,50	10,19,8	331	149	0.7134	1	0.63,0.814,0.592	0.72,0.505,0.738	0.024		1928	ENSMUSG00000002968.10	Med25	chr7	-	44528814	44529528	44528814	44528938	44529350	44529528	1928	11,6,15	22,14,22	8,18,15	20,26,31	561	149	0.928573	1	0.117,0.102,0.153	0.096,0.155,0.114	0.002		398	ENSMUSG00000023007.16
1360	ENSMUSG00000042439.14	Zfp532	chr18	+	65777263	65777440	65758208	65758405	65784630	65784793	1360	52,33,46	1,0,3	46,69,44	2,0,0	326	149	0.648329	1	0.96,1.0,0.875	0.913,1.0,1.0	-0.026		1931	ENSMUSG00000001305.6	Rrp15	chr1	-	186469784	186472060	186469784	186469882	186471800	186472060	1931	50,31,37	26,19,41	36,21,36	6,44,29	2067	149	0.874951	1	0.122,0.105,0.061	0.302,0.033,0.082	-0.043		399	ENSMUSG00000023007.16
1361	ENSMUSG00000042439.14	Zfp532	chr18	+	65777263	65777440	65758208	65758405	65815965	65816078	1361	18,15,18	9,4,9	19,24,15	10,19,8	326	149	0.268196	1	0.478,0.632,0.478	0.465,0.366,0.461	0.099		1933	ENSMUSG00000026532.8	Spta1	chr1	+	174056807	174058354	174056807	174056906	174058191	174058354	1933	0,2,0	0,3,1	3,1,0	1,2,0	1434	149	1	1	NA,0.065,0.0	0.238,0.049,NA	-0.111		400	ENSMUSG00000023007.16
1362	ENSMUSG00000042439.14	Zfp532	chr18	+	65777263	65777440	65771820	65772002	65815965	65816078	1362	51,48,52	0,0,0	58,32,40	1,0,0	326	149	1	1	1.0,1.0,1.0	0.964,1.0,1.0	0.012		1938	ENSMUSG00000002949.16	Timm44	chr8	-	4315225	4316680	4315225	4315276	4316555	4316680	1938	48,47,27	23,24,40	48,42,45	19,36,48	1428	149	0.863366	1	0.179,0.17,0.066	0.209,0.109,0.089	0.003		401	ENSMUSG00000048154.18
1363	ENSMUSG00000042439.14	Zfp532	chr18	+	65784630	65784793	65756054	65758405	65815965	65816078	1363	1,3,9	9,4,9	10,6,4	10,19,8	312	149	0.910057	1	0.05,0.264,0.323	0.323,0.131,0.193	-0.003		1939	ENSMUSG00000036833.17	Pnpla7	chr2	+	24892626	24893044	24892626	24892727	24892900	24893044	1939	0,1,0	2,0,2	1,0,0	1,0,6	322	149	1	1	0.0,1.0,0.0	0.316,NA,0.0	0.175		403	ENSMUSG00000022994.10
1365	ENSMUSG00000042439.14	Zfp532	chr18	+	65784630	65784793	65777263	65777440	65815965	65816078	1365	36,28,38	1,7,4	39,55,42	4,4,9	312	149	0.800018	1	0.945,0.656,0.819	0.823,0.868,0.69	0.013		1941	ENSMUSG00000053519.18	Kcnip1	chr11	-	33593295	33595627	33593295	33593366	33594498	33595627	1941	0,2,0	4,0,0	2,0,0	2,2,3	1281	149	1	1	0.0,1.0,NA	0.104,0.0,0.0	0.465		407	ENSMUSG00000022469.18
1366	ENSMUSG00000042439.14	Zfp532	chr18	+	65784630	65784793	65779963	65780074	65815965	65816078	1366	0,3,7	0,1,0	9,6,6	0,0,0	312	149	1	1	NA,0.589,1.0	1.0,1.0,1.0	-0.206		1942	ENSMUSG00000053519.18	Kcnip1	chr11	-	33594498	33595627	33594498	33594568	33595502	33595627	1942	0,0,0	4,0,0	0,2,0	2,2,3	1083	149	1	1	0.0,NA,NA	0.0,0.121,0.0	-0.04		410	ENSMUSG00000033228.9
1367	ENSMUSG00000042439.14	Zfp532	chr18	+	65789421	65789703	65777263	65777440	65815965	65816078	1367	52,51,65	1,7,4	81,68,88	4,4,9	431	149	0.95642	1	0.947,0.716,0.849	0.875,0.855,0.772	0.003		1951	ENSMUSG00000002043.18	Trappc6a	chr7	+	19248346	19249015	19248346	19248464	19248949	19249015	1951	7,6,8	0,0,1	27,10,20	0,1,0	634	149	1	1	1.0,1.0,0.653	1.0,0.702,1.0	-0.016		412	ENSMUSG00000022621.17
1368	ENSMUSG00000042439.14	Zfp532	chr18	+	65789421	65789703	65784630	65784793	65815965	65816078	1368	68,57,75	0,0,0	105,94,105	2,0,0	431	149	1	1	1.0,1.0,1.0	0.948,1.0,1.0	0.017		1953	ENSMUSG00000039205.17	Ciz1	chr2	+	32260875	32261420	32260875	32261113	32261260	32261420	1953	26,16,31	2,1,4	34,27,32	0,4,4	296	149	0.65071	1	0.867,0.89,0.796	1.0,0.773,0.801	-0.007		415	ENSMUSG00000036561.10
1369	ENSMUSG00000032688.10	Malt1	chr18	+	65582645	65582678	65581992	65582089	65584617	65584644	1369	0,0,0	3,2,4	1,0,0	0,1,2	182	149	1	1	0.0,0.0,0.0	1.0,0.0,0.0	-0.333		1955	ENSMUSG00000039205.17	Ciz1	chr2	+	32264353	32265584	32264353	32264478	32265496	32265584	1955	44,23,32	8,7,14	76,56,20	7,21,15	1167	149	0.989033	1	0.413,0.296,0.226	0.581,0.254,0.145	-0.015		418	ENSMUSG00000051786.16
1370	ENSMUSG00000032688.10	Malt1	chr18	+	65589827	65589906	65586745	65586775	65591239	65591443	1370	1,0,0	3,0,1	0,0,0	0,0,1	228	149	1	1	0.179,NA,0.0	NA,NA,0.0	0.089		1959	ENSMUSG00000068284.15	Usf3	chr16	+	44019266	44019530	44019266	44019384	44019481	44019530	1959	2,7,0	4,0,4	3,9,0	5,0,2	246	149	0.75737	1	0.232,1.0,0.0	0.267,1.0,0.0	-0.012		419	ENSMUSG00000035757.18
1371	ENSMUSG00000032688.10	Malt1	chr18	+	65592745	65592809	65591239	65591443	65595806	65595984	1371	2,0,2	1,0,1	2,2,0	2,1,2	213	149	1	1	0.583,NA,0.583	0.412,0.583,0.0	0.251		1960	ENSMUSG00000037742.15	Eef1a1	chr9	-	78386239	78386816	78386239	78386474	78386559	78386816	1960	71,96,115	601552758227	77,71,94	792080859593	234	149	0.861668	1	0.007,0.011,0.009	0.006,0.006,0.006	0.003		421	ENSMUSG00000035845.18
1377	ENSMUSG00000024587.11	Nars	chr18	-	64644681	64644771	64643523	64643602	64644855	64644948	1377	90,49,106	3,0,0	185128152	0,0,0	239	149	1	1	0.949,1.0,1.0	1.0,1.0,1.0	-0.017		1963	ENSMUSG00000037470.15	Uggt1	chr1	-	36201285	36202491	36201285	36201444	36202301	36202491	1963	4,2,6	39,41,56	3,6,6	52,52,39	1006	149	0.624495	1	0.015,0.007,0.016	0.008,0.017,0.022	-0.003		423	ENSMUSG00000016763.16
1378	ENSMUSG00000024587.11	Nars	chr18	-	64645054	64645120	64644855	64644948	64648396	64648476	1378	73,61,149	0,0,0	172100126	0,0,1	215	149	1	1	1.0,1.0,1.0	1.0,1.0,0.989	0.004		1969	ENSMUSG00000028952.13	Zbtb48	chr4	-	152105745	152106085	152105745	152105900	152105998	152106085	1969	0,2,2	7,4,3	0,0,5	4,3,5	247	149	0.883515	1	0.0,0.232,0.287	0.0,0.0,0.376	0.048		425	ENSMUSG00000058586.13
1379	ENSMUSG00000024587.11	Nars	chr18	-	64647885	64647935	64645054	64645120	64648396	64648476	1379	0,1,0	64,59,140	1,0,0	164,99,121	199	149	1	1	0.0,0.013,0.0	0.005,0.0,0.0	0.003		1970	ENSMUSG00000028952.13	Zbtb48	chr4	-	152110234	152111516	152110234	152110476	152110844	152111516	1970	6,5,14	0,0,0	3,6,0	0,0,1	517	149	1	1	1.0,1.0,1.0	1.0,1.0,0.0	0.333		427	ENSMUSG00000022394.15
1383	ENSMUSG00000024588.11	Fech	chr18	-	64616404	64616528	64611721	64611841	64621971	64622055	1383	59,53,63	4,2,13	80,61,69	2,8,2	273	149	0.132308	1	0.89,0.935,0.726	0.956,0.806,0.95	-0.054		1976	ENSMUSG00000029580.15	Actb	chr5	-	142890991	142891231	142890991	142891033	142891183	142891231	1976	8643767611476	49,44,71	100861107012221	52,61,81	299	149	0.973794	1	0.989,0.989,0.988	0.99,0.989,0.987	0		433	ENSMUSG00000022382.16
1384	ENSMUSG00000040560.11	Wdr7	chr18	+	63853288	63853460	63841755	63841990	63853827	63853934	1384	19,15,30	1,0,0	15,10,27	0,0,0	321	149	1	1	0.898,1.0,1.0	1.0,1.0,1.0	-0.034		1985	ENSMUSG00000042286.14	Stab1	chr14	-	30861882	30862224	30861882	30862032	30862104	30862224	1985	1,2,1	6,7,10	2,3,1	20,12,24	221	149	0.577508	1	0.101,0.162,0.063	0.063,0.144,0.027	0.031		434	ENSMUSG00000000489.8
1393	ENSMUSG00000033871.15	Ppargc1b	chr18	-	61442716	61442753	61442103	61442165	61443477	61444579	1393	8,0,0	2,0,4	10,2,0	0,0,4	186	149	1	1	0.762,NA,0.0	1.0,1.0,0.0	-0.286		1986	ENSMUSG00000042286.14	Stab1	chr14	-	30862312	30862677	30862312	30862422	30862511	30862677	1986	3,5,0	3,4,6	3,0,8	9,10,12	238	149	0.589252	1	0.385,0.439,0.0	0.173,0.0,0.294	0.119		435	ENSMUSG00000033020.8
1395	ENSMUSG00000024622.9	Hmgxb3	chr18	-	61266013	61266153	61265569	61265667	61266923	61267133	1395	2,0,0	17,11,31	0,0,0	24,19,29	289	149	1	1	0.057,0.0,0.0	0.0,0.0,0.0	0.019		1988	ENSMUSG00000038241.17	Cep250	chr2	+	155811914	155812156	155811914	155812076	155812139	155812156	1988	38,33,46	0,1,0	41,45,39	0,0,1	212	149	1	1	1.0,0.959,1.0	1.0,1.0,0.965	-0.002		436	ENSMUSG00000033029.13
1398	ENSMUSG00000024622.9	Hmgxb3	chr18	-	61300267	61300765	61298556	61298655	61304279	61304454	1398	50,63,62	0,0,0	36,61,85	0,1,0	647	149	1	1	1.0,1.0,1.0	1.0,0.934,1.0	0.022		1991	ENSMUSG00000002107.19	Celf2	chr2	-	6544515	6552024	6544515	6550486	6551852	6552024	1991	42,43,46	27,16,33	55,26,37	34,16,24	1515	149	0.698494	1	0.133,0.209,0.121	0.137,0.138,0.132	0.019		437	ENSMUSG00000033039.11
1400	ENSMUSG00000024620.12	Pdgfrb	chr18	+	61194276	61194597	61193215	61193261	61196938	61197205	1400	27,26,36	0,0,1	36,62,33	0,0,0	470	149	1	1	1.0,1.0,0.919	1.0,1.0,1.0	-0.027		1997	ENSMUSG00000015083.12	C8g	chr2	-	25388667	25389127	25388667	25388955	25389025	25389127	1997	1,2,0	0,0,2	5,0,1	0,0,0	219	149	1	1	1.0,1.0,0.0	1.0,NA,1.0	-0.333		438	ENSMUSG00000033088.20
1401	ENSMUSG00000024620.12	Pdgfrb	chr18	+	61213367	61213467	61212695	61212807	61214026	61214132	1401	1,12,14	0,0,1	11,4,7	0,0,0	249	149	1	1	1.0,1.0,0.893	1.0,1.0,1.0	-0.036		2001	ENSMUSG00000029625.17	Cpsf4	chr5	+	145114039	145115738	145114039	145114112	145115645	145115738	2001	48,54,50	13,8,19	63,33,44	10,10,24	1682	149	0.583895	1	0.246,0.374,0.189	0.358,0.226,0.14	0.028		440	ENSMUSG00000033128.10
1403	ENSMUSG00000024617.17	Camk2a	chr18	+	61102082	61102115	61096625	61097035	61103065	61103114	1403	0,2,0	4,1,0	0,1,0	0,1,1	182	149	1	1	0.0,0.621,NA	NA,0.45,0.0	0.085		2002	ENSMUSG00000037239.9	Spred3	chr7	-	28865951	28867398	28865951	28866120	28867217	28867398	2002	11,22,30	2,0,2	42,21,13	1,4,0	1246	149	0.908311	1	0.397,1.0,0.642	0.834,0.386,1.0	-0.06		444	ENSMUSG00000116138.2
1404	ENSMUSG00000054008.10	Ndst1	chr18	-	60825000	60825171	60824249	60824359	60828407	60828582	1404	40,18,22	0,0,0	13,37,30	0,0,1	320	149	1	1	1.0,1.0,1.0	1.0,1.0,0.933	0.022		2007	ENSMUSG00000017747.14	Ghdc	chr11	-	100658839	100659115	100658839	100658973	100659043	100659115	2007	0,0,0	3,0,0	0,1,0	0,2,0	219	149	1	1	0.0,NA,NA	NA,0.254,NA	-0.254		446	ENSMUSG00000004187.12
1405	ENSMUSG00000054008.10	Ndst1	chr18	-	60832579	60832762	60831510	60831607	60833443	60833572	1405	167135167	0,0,0	109145150	1,0,1	332	149	1	1	1.0,1.0,1.0	0.98,1.0,0.985	0.012		2008	ENSMUSG00000022948.17	Setd4	chr16	-	93382066	93383205	93382066	93382190	93383124	93383205	2008	4,2,5	0,3,7	6,0,5	2,4,2	1083	149	0.978152	1	1.0,0.084,0.089	0.292,0.0,0.256	0.208		448	ENSMUSG00000022550.19
1406	ENSMUSG00000054008.10	Ndst1	chr18	-	60845794	60846704	60840672	60841167	60881572	60881722	1406	159137163	0,0,0	120128154	1,0,0	1059	149	1	1	1.0,1.0,1.0	0.944,1.0,1.0	0.019		2013	ENSMUSG00000046111.19	Cep295	chr9	-	15228754	15229063	15228754	15228889	15228969	15229063	2013	16,9,10	8,4,2	20,19,16	10,3,7	229	149	0.891227	1	0.565,0.594,0.765	0.565,0.805,0.598	-0.015		450	ENSMUSG00000031012.18
1408	ENSMUSG00000043079.18	Synpo	chr18	-	60742982	60743073	60733277	60737562	60757242	60757308	1408	0,0,0	0,0,2	1,0,0	4,0,9	240	149	1	1	NA,NA,0.0	0.134,NA,0.0	-0.067		2019	ENSMUSG00000053332.14	Gas5	chr1	+	160863552	160864885	160863552	160863584	160864389	160864885	2019	529556683	0,2,1	485548601	0,0,2	954	149	1	1	1.0,0.977,0.991	1.0,1.0,0.979	-0.004		452	ENSMUSG00000022558.17
1409	ENSMUSG00000024603.9	Dctn4	chr18	+	60678428	60678449	60677110	60677218	60678819	60678893	1409	3,1,0	2,5,1	3,1,0	4,8,11	170	149	0.598256	1	0.568,0.149,0.0	0.397,0.099,0.0	0.074		2028	ENSMUSG00000058407.13	Txndc9	chr1	-	38033072	38034922	38033072	38033191	38034713	38034922	2028	42,43,37	19,46,57	46,44,26	31,39,44	1671	149	0.950134	1	0.165,0.077,0.055	0.117,0.091,0.05	0.013		453	ENSMUSG00000022564.8
1414	ENSMUSG00000050875.12	Minar2	chr18	+	59199981	59200061	59195582	59195634	59205264	59205489	1414	0,0,1	7,1,1	1,0,1	0,0,0	229	149	1	1	0.0,0.0,0.394	1.0,NA,1.0	-0.869		2030	ENSMUSG00000029713.16	Gnb2	chr5	-	137527265	137527771	137527265	137527467	137527704	137527771	2030	13,2,17	81,52,81	15,13,4	67,81,91	386	149	0.74486	1	0.058,0.015,0.075	0.08,0.058,0.017	-0.002		459	ENSMUSG00000072501.6
1418	ENSMUSG00000024598.10	Fbn2	chr18	-	58186014	58186167	58183282	58183351	58186720	58186846	1418	76,54,115	0,0,0	82,88,125	0,0,1	302	149	1	1	1.0,1.0,1.0	1.0,1.0,0.984	0.005		2031	ENSMUSG00000029713.16	Gnb2	chr5	-	137528107	137528552	137528107	137528171	137528445	137528552	2031	8,1,11	47,47,69	8,3,13	97,68,84	423	149	0.618601	1	0.057,0.007,0.053	0.028,0.015,0.052	0.007		460	ENSMUSG00000072501.6
1419	ENSMUSG00000024598.10	Fbn2	chr18	-	58286831	58287029	58282062	58282188	58323312	58323408	1419	56,49,75	0,1,0	78,52,120	0,0,0	347	149	1	1	1.0,0.955,1.0	1.0,1.0,1.0	-0.015		2034	ENSMUSG00000021819.12	Zswim8	chr14	+	20769447	20770104	20769447	20769740	20769880	20770104	2034	10,4,3	4,6,9	22,0,9	10,10,1	289	149	0.748268	1	0.563,0.256,0.147	0.531,0.0,0.823	-0.129		461	ENSMUSG00000022377.17
1420	ENSMUSG00000024598.10	Fbn2	chr18	-	58336817	58336916	58333681	58333777	58341671	58341754	1420	68,68,81	4,3,1	132,88,93	0,1,4	248	149	0.117979	1	0.911,0.932,0.98	1.0,0.981,0.933	-0.03		2036	ENSMUSG00000021819.12	Zswim8	chr14	+	20772527	20773074	20772527	20772647	20772895	20773074	2036	10,8,4	9,9,15	16,10,2	18,13,11	397	149	0.9615	1	0.294,0.25,0.091	0.25,0.224,0.064	0.032		464	ENSMUSG00000024050.19
1423	ENSMUSG00000053644.14	Aldh7a1	chr18	-	56665559	56665666	56665052	56665169	56667261	56667346	1423	64,67,99	4,0,1	86,94,92	0,0,0	256	149	0.747007	1	0.903,1.0,0.983	1.0,1.0,1.0	-0.038		2040	ENSMUSG00000026520.9	Pycr2	chr1	+	180733727	180734252	180733727	180733949	180734159	180734252	2040	3,9,0	20,32,36	0,14,1	15,36,41	359	149	0.648363	1	0.059,0.105,0.0	0.0,0.139,0.01	0.005		465	ENSMUSG00000097039.9
1425	ENSMUSG00000053644.14	Aldh7a1	chr18	-	56675296	56675394	56671772	56671814	56678036	56678114	1425	35,31,36	0,0,3	50,31,39	1,0,0	247	149	0.821474	1	1.0,1.0,0.879	0.968,1.0,1.0	-0.03		2050	ENSMUSG00000025915.15	Sgk3	chr1	+	9955891	9956367	9955891	9955978	9956213	9956367	2050	0,1,0	0,2,0	1,2,0	0,0,0	384	149	1	1	NA,0.162,NA	1.0,1.0,NA	-0.838		467	ENSMUSG00000022353.11
1426	ENSMUSG00000053644.14	Aldh7a1	chr18	-	56675324	56675394	56671772	56671814	56678036	56678114	1426	1,6,3	0,0,3	5,3,5	1,0,0	219	149	0.262261	1	1.0,1.0,0.405	0.773,1.0,1.0	-0.123		2055	ENSMUSG00000041936.19	Agrn	chr4	-	156257459	156258137	156257459	156257587	156257999	156258137	2055	47,26,31	32,26,49	49,36,33	47,37,53	561	149	0.598782	1	0.281,0.21,0.144	0.217,0.205,0.142	0.024		468	ENSMUSG00000050891.11
1429	ENSMUSG00000001700.11	Gramd3	chr18	+	56611920	56612024	56609674	56609741	56615692	56615788	1429	10,7,11	0,1,0	13,14,14	0,0,0	253	149	1	1	1.0,0.805,1.0	1.0,1.0,1.0	-0.065		2056	ENSMUSG00000060950.13	Trmt61a	chr12	+	111644538	111645396	111644538	111644595	111645036	111645396	2056	38,42,90	0,1,1	17,44,42	1,0,1	590	149	1	1	1.0,0.914,0.958	0.811,1.0,0.914	0.049		469	ENSMUSG00000050891.11
1430	ENSMUSG00000052713.10	Zfp608	chr18	-	55079624	55079880	55033284	55033372	55120682	55121778	1430	58,39,83	0,1,1	58,85,81	0,0,1	405	149	1	1	1.0,0.935,0.968	1.0,1.0,0.968	-0.022		2060	ENSMUSG00000030822.16	Prr14	chr7	+	127072766	127073158	127072766	127072888	127072968	127073158	2060	4,2,1	7,18,21	1,2,4	19,16,29	229	149	0.788708	1	0.271,0.067,0.03	0.033,0.075,0.082	0.059		480	ENSMUSG00000041594.19
1432	ENSMUSG00000073563.4	Csnk1g3	chr18	+	54081716	54081740	54081119	54081226	54086316	54088620	1432	5,3,3	15,14,23	2,5,7	7,9,18	173	149	0.152345	1	0.223,0.156,0.101	0.197,0.324,0.251	-0.097		2064	ENSMUSG00000029104.16	Htt	chr5	+	35056140	35057271	35056140	35056270	35057115	35057271	2064	17,17,11	11,8,15	27,26,20	27,9,27	994	149	0.898462	1	0.188,0.242,0.099	0.13,0.302,0.1	-0.001		493	ENSMUSG00000034731.12
1434	ENSMUSG00000024535.17	Snx24	chr18	+	53460483	53460567	53378733	53378924	53473201	53473306	1434	1,2,18	0,0,0	3,12,21	0,0,1	233	149	1	1	1.0,1.0,1.0	1.0,1.0,0.931	0.023		2066	ENSMUSG00000027953.14	Slc50a1	chr3	-	89177133	89177446	89177133	89177257	89177368	89177446	2066	4,2,2	5,4,8	14,0,4	9,8,9	260	149	0.765385	1	0.314,0.223,0.125	0.471,0.0,0.203	-0.004		498	ENSMUSG00000022561.14
1436	ENSMUSG00000024528.9	Srfbp1	chr18	+	52616704	52616776	52609371	52609444	52621322	52621671	1436	0,1,4	0,0,0	6,0,0	1,0,2	221	149	1	1	NA,1.0,1.0	0.802,NA,0.0	0.599		2072	ENSMUSG00000005882.19	Uqcc1	chr2	-	155752276	155753756	155752276	155752387	155753660	155753756	2072	14,15,24	1,6,3	20,22,9	5,3,4	1422	149	0.621283	1	0.595,0.208,0.456	0.295,0.435,0.191	0.113		502	ENSMUSG00000031156.19
1437	ENSMUSG00000024528.9	Srfbp1	chr18	+	52620583	52620665	52616704	52616776	52621322	52621671	1437	26,13,33	0,1,0	26,34,32	0,0,0	231	149	1	1	1.0,0.893,1.0	1.0,1.0,1.0	-0.036		2084	ENSMUSG00000028180.19	Zranb2	chr3	+	157247336	157248881	157247336	157247506	157248794	157248881	2084	63,73,72	160131201	95,95,81	186243195	1437	149	0.854613	1	0.039,0.055,0.036	0.05,0.039,0.041	0		504	ENSMUSG00000030584.15
1442	ENSMUSG00000019647.17	Sema6a	chr18	-	47403675	47403861	47378321	47382651	47412182	47412241	1442	15,19,19	0,2,0	13,12,12	0,2,1	335	149	0.84796	1	1.0,0.809,1.0	1.0,0.727,0.842	0.08		2095	ENSMUSG00000011658.17	Fuz	chr7	+	44548408	44550048	44548408	44548810	44549556	44550048	2095	5,8,7	1,4,6	13,9,15	10,1,10	895	149	0.765821	1	0.454,0.25,0.163	0.178,0.6,0.2	-0.037		506	ENSMUSG00000037563.16
1443	ENSMUSG00000019647.17	Sema6a	chr18	-	47409485	47409536	47403675	47403840	47409652	47409673	1443	18,2,2	5,9,11	3,4,6	5,9,9	200	149	0.957838	1	0.728,0.142,0.119	0.309,0.249,0.332	0.033		2099	ENSMUSG00000038671.16	Arfrp1	chr2	-	181002793	181003265	181002793	181002864	181003183	181003265	2099	4,8,7	9,7,14	0,12,13	19,15,16	468	149	0.583183	1	0.124,0.267,0.137	0.0,0.203,0.206	0.04		516	ENSMUSG00000026798.11
1444	ENSMUSG00000019647.17	Sema6a	chr18	-	47409652	47409673	47380504	47382651	47412182	47412241	1444	0,3,3	0,2,0	2,7,2	0,2,1	170	149	1	1	NA,0.568,1.0	1.0,0.754,0.637	-0.013		2115	ENSMUSG00000047793.14	Sned1	chr1	+	93210923	93211409	93210923	93211107	93211296	93211409	2115	0,0,0	0,2,0	2,2,0	2,0,0	338	149	1	1	NA,0.0,NA	0.306,1.0,NA	-0.653		519	ENSMUSG00000074358.10
1445	ENSMUSG00000024480.10	Ap3s1	chr18	+	46890448	46890502	46887437	46887529	46891069	46891181	1445	0,1,0	0,4,11	0,0,0	6,2,8	203	149	1	1	NA,0.155,0.0	0.0,0.0,0.0	0.077		2116	ENSMUSG00000002831.15	Plin4	chr17	-	56410416	56414374	56410416	56412501	56413095	56414374	2116	4,7,1	0,0,0	2,0,0	0,0,2	743	149	1	1	1.0,1.0,1.0	1.0,NA,0.0	0.5		521	ENSMUSG00000016344.15
1448	ENSMUSG00000024477.5	Pggt1b	chr18	-	46378266	46378319	46374507	46374768	46379628	46379737	1448	0,0,0	6,17,7	0,2,0	11,9,26	202	149	1	1	0.0,0.0,0.0	0.0,0.141,0.0	-0.047		2129	ENSMUSG00000036678.9	Aaas	chr15	-	102247620	102247853	102247620	102247688	102247759	102247853	2129	0,2,2	11,18,28	1,4,0	16,24,28	220	149	0.850582	1	0.0,0.07,0.046	0.041,0.101,0.0	-0.009		523	ENSMUSG00000059689.16
1450	ENSMUSG00000024477.5	Pggt1b	chr18	-	46395956	46396024	46392670	46392822	46407656	46407775	1450	29,18,38	0,0,0	23,24,12	0,0,1	217	149	1	1	1.0,1.0,1.0	1.0,1.0,0.892	0.036		2137	ENSMUSG00000053841.16	Txlna	chr4	-	129525072	129525503	129525072	129525147	129525383	129525503	2137	12,16,8	51,35,57	6,10,9	39,31,41	385	149	0.64017	1	0.083,0.15,0.052	0.056,0.111,0.078	0.013		530	ENSMUSG00000026812.17
1454	ENSMUSG00000034653.12	Ythdc2	chr18	+	44967525	44967725	44966088	44966285	44970407	44970574	1454	13,9,15	0,0,1	15,28,24	0,0,0	349	149	1	1	1.0,1.0,0.865	1.0,1.0,1.0	-0.045		2140	ENSMUSG00000026360.10	Rgs2	chr1	-	143878517	143878791	143878517	143878579	143878689	143878791	2140	1,1,0	12,6,8	0,1,5	12,12,8	259	149	1	1	0.046,0.087,0.0	0.0,0.046,0.264	-0.059		532	ENSMUSG00000025958.15
1455	ENSMUSG00000034653.12	Ythdc2	chr18	+	44990075	44990158	44988410	44988491	44991254	44991360	1455	6,13,29	0,0,0	11,15,14	0,0,1	232	149	1	1	1.0,1.0,1.0	1.0,1.0,0.9	0.033		2144	ENSMUSG00000062647.17	Rpl7a	chr2	+	26802682	26803069	26802682	26802813	26802999	26803069	2144	25,16,35	8507761425	8,18,11	102911651410	335	149	0.758061	1	0.013,0.009,0.011	0.003,0.007,0.003	0.007		534	ENSMUSG00000063810.8
1456	ENSMUSG00000024502.11	Jakmip2	chr18	-	43670720	43670791	43664471	43665029	43673650	43673716	1456	1,1,15	3,2,2	4,0,5	4,0,2	220	149	1	1	0.184,0.253,0.836	0.404,NA,0.629	-0.092		2145	ENSMUSG00000026942.14	Traf2	chr2	-	25418243	25420460	25418243	25418318	25420298	25420460	2145	9,10,4	5,5,1	12,9,9	2,3,12	2129	149	0.768386	1	0.112,0.123,0.219	0.296,0.174,0.05	-0.022		544	ENSMUSG00000001576.16
1458	ENSMUSG00000024498.17	Tcerg1	chr18	+	42668149	42668212	42663694	42663955	42669242	42669354	1458	24,36,38	37,31,41	30,26,32	41,45,49	212	149	0.157201	1	0.313,0.449,0.394	0.34,0.289,0.315	0.071		2146	ENSMUSG00000002395.15	Use1	chr8	+	71820287	71820492	71820287	71820337	71820413	71820492	2146	5,4,2	28,20,30	2,4,7	33,27,58	225	149	0.704659	1	0.106,0.117,0.042	0.039,0.089,0.074	0.021		547	ENSMUSG00000006335.17
1460	ENSMUSG00000024498.17	Tcerg1	chr18	+	42684174	42684225	42683106	42683173	42685556	42685692	1460	1,1,2	14,15,20	1,0,0	16,16,22	200	149	0.161912	1	0.051,0.047,0.069	0.044,0.0,0.0	0.041		2154	ENSMUSG00000042831.14	Alkbh6	chr7	+	30008905	30009479	30008905	30008984	30009410	30009479	2154	1,2,5	3,10,6	0,6,5	1,9,12	575	149	0.784922	1	0.08,0.049,0.178	0.0,0.147,0.097	0.021		548	ENSMUSG00000006335.17
1461	ENSMUSG00000024498.17	Tcerg1	chr18	+	42704079	42704259	42701492	42701675	42704888	42704972	1461	74,98,163	0,1,1	122109157	1,4,0	329	149	0.519676	1	1.0,0.978,0.987	0.982,0.925,1.0	0.019		2155	ENSMUSG00000042831.14	Alkbh6	chr7	+	30008905	30009479	30008905	30008984	30009452	30009479	2155	3,3,7	0,0,0	0,9,10	0,0,4	617	149	1	1	1.0,1.0,1.0	NA,1.0,0.376	0.312		549	ENSMUSG00000006335.17
1462	ENSMUSG00000024498.17	Tcerg1	chr18	+	42707224	42707318	42706324	42706425	42707582	42707856	1462	9,9,4	49,29,63	4,10,5	43,48,44	243	149	0.705227	1	0.101,0.16,0.037	0.054,0.113,0.065	0.022		2157	ENSMUSG00000042831.14	Alkbh6	chr7	+	30011661	30012132	30011661	30011813	30012015	30012132	2157	8,14,9	6,5,10	16,11,10	3,13,15	351	149	0.862995	1	0.361,0.543,0.276	0.694,0.264,0.221	0		556	ENSMUSG00000000276.12
1466	ENSMUSG00000036452.19	Arhgap26	chr18	+	39338336	39338373	39283092	39283171	39360420	39360486	1466	0,2,1	0,0,0	2,0,3	0,2,0	186	149	1	1	NA,1.0,1.0	1.0,0.0,1.0	0.333		2158	ENSMUSG00000027333.19	Smox	chr2	+	131362014	131363091	131362014	131362188	131362331	131363091	2158	0,2,0	3,0,2	1,2,0	0,4,9	292	149	0.948367	1	0.0,1.0,0.0	1.0,0.203,0.0	-0.068		557	ENSMUSG00000032641.19
1471	ENSMUSG00000024425.5	Ndfip1	chr18	+	38593597	38593703	38589107	38589174	38597329	38597427	1471	40,38,71	0,0,0	44,40,60	0,1,0	255	149	1	1	1.0,1.0,1.0	1.0,0.959,1.0	0.014		2161	ENSMUSG00000027333.19	Smox	chr2	+	131362331	131363091	131362331	131362566	131362974	131363091	2161	16,19,24	2,0,0	10,23,2	0,0,0	557	149	1	1	0.682,1.0,1.0	1.0,1.0,1.0	-0.106		571	ENSMUSG00000010936.12
1472	ENSMUSG00000052102.16	Gnpda1	chr18	-	38463538	38463713	38460602	38462026	38466206	38466389	1472	25,8,16	2,0,0	28,9,11	0,0,0	324	149	1	1	0.852,1.0,1.0	1.0,1.0,1.0	-0.049		2162	ENSMUSG00000042699.12	Dhx9	chr1	-	153340363	153340814	153340363	153340458	153340600	153340814	2162	13,12,20	200133242	17,16,16	203217233	291	149	0.887947	1	0.032,0.044,0.041	0.041,0.036,0.034	0.002		577	ENSMUSG00000026110.16
1473	ENSMUSG00000052102.16	Gnpda1	chr18	-	38465020	38465205	38463538	38463713	38466206	38466389	1473	9,8,17	0,0,0	17,8,14	0,1,0	334	149	1	1	1.0,1.0,1.0	1.0,0.781,1.0	0.073		2165	ENSMUSG00000004896.17	Rrnad1	chr3	-	87831650	87832738	87831650	87831835	87832253	87832738	2165	9,15,4	0,1,0	8,7,13	0,0,0	567	149	1	1	1.0,0.798,1.0	1.0,1.0,1.0	-0.067		585	ENSMUSG00000030104.10
1474	ENSMUSG00000051375.16	Pcdh1	chr18	-	38324113	38324152	38318966	38322995	38325104	38325324	1474	2,0,0	16,10,9	2,2,0	19,15,22	188	149	0.642017	1	0.09,0.0,0.0	0.077,0.096,0.0	-0.028		2166	ENSMUSG00000004896.17	Rrnad1	chr3	-	87834037	87834424	87834037	87834181	87834361	87834424	2166	8,1,0	2,1,0	2,4,3	0,9,1	329	149	1	1	0.644,0.312,NA	1.0,0.168,0.576	-0.103		589	ENSMUSG00000050323.15
1476	ENSMUSG00000024451.10	Arap3	chr18	-	38107154	38107193	38105680	38106704	38107417	38107555	1476	3,4,0	0,0,1	2,0,0	0,0,0	188	149	1	1	1.0,1.0,0.0	1.0,NA,NA	-0.333		2167	ENSMUSG00000004896.17	Rrnad1	chr3	-	87834869	87835355	87834869	87835022	87835230	87835355	2167	6,5,5	1,0,1	2,8,8	0,1,1	357	149	1	1	0.715,1.0,0.676	1.0,0.77,0.77	-0.05		601	ENSMUSG00000030980.18
1479	ENSMUSG00000044024.17	Rell2	chr18	+	38090141	38090208	38089865	38090047	38090641	38090731	1479	0,1,0	0,0,0	7,3,3	1,0,1	216	149	1	1	NA,1.0,NA	0.828,1.0,0.674	0.166		2169	ENSMUSG00000043843.18	Tmem145	chr7	+	25006872	25007101	25006872	25006959	25007041	25007101	2169	0,0,0	0,1,0	3,1,1	0,0,2	231	149	1	1	NA,0.0,NA	1.0,1.0,0.244	-0.748		604	ENSMUSG00000023755.11
1484	ENSMUSG00000024750.12	Zfand5	chr19	+	21255018	21255122	21253343	21254453	21256988	21257114	1484	120,96,141	2,4,3	96134170	1,7,6	253	149	0.387134	1	0.972,0.934,0.965	0.983,0.919,0.943	0.009		2171	ENSMUSG00000030035.15	Wbp1	chr6	-	83097165	83097857	83097165	83097268	83097752	83097857	2171	19,23,28	7,10,27	32,21,31	24,16,10	633	149	0.956667	1	0.39,0.351,0.196	0.239,0.236,0.422	0.013		605	ENSMUSG00000020886.18
1501	ENSMUSG00000037236.17	Matr3	chr18	+	35695947	35696153	35695244	35695312	35704895	35705176	1501	2,4,13	10,2,6	8,12,1	0,5,4	355	149	0.305753	1	0.077,0.456,0.476	1.0,0.502,0.095	-0.196		2175	ENSMUSG00000018076.13	Med13l	chr5	+	118887673	118889099	118887673	118887893	118888910	118889099	2175	35,18,13	26,14,28	30,37,13	25,29,32	1166	149	0.969063	1	0.147,0.141,0.056	0.133,0.14,0.049	0.007		608	ENSMUSG00000024845.20
1502	ENSMUSG00000037236.17	Matr3	chr18	+	35704895	35705988	35695190	35695345	35710610	35710672	1502	886689950	0,2,3	888899935	7,2,1	1242	149	0.143362	1	1.0,0.976,0.974	0.938,0.982,0.991	0.013		2178	ENSMUSG00000030802.15	Bckdk	chr7	+	127504393	127504652	127504393	127504462	127504541	127504652	2178	1,0,1	76,42,57	1,2,2	69,92,71	228	149	1	1	0.009,0.0,0.011	0.009,0.014,0.018	-0.007		609	ENSMUSG00000024845.20
1503	ENSMUSG00000037236.17	Matr3	chr18	+	35704895	35705988	35695497	35695574	35710610	35710672	1503	873670932	4,8,2	870884922	4,0,6	1242	149	0.279076	1	0.963,0.909,0.982	0.963,1.0,0.949	-0.019		2181	ENSMUSG00000053024.15	Cntn2	chr1	-	132456349	132456823	132456349	132456445	132456647	132456823	2181	0,1,2	0,0,0	0,0,0	0,0,1	351	149	1	1	NA,1.0,1.0	NA,NA,0.0	1		617	ENSMUSG00000032280.17
1504	ENSMUSG00000037236.17	Matr3	chr18	+	35705819	35705988	35695539	35695574	35710610	35710672	1504	226200220	4,8,2	250223222	4,0,6	318	149	0.291537	1	0.964,0.921,0.981	0.967,1.0,0.945	-0.015		2182	ENSMUSG00000052921.14	Arhgef15	chr11	-	68837809	68838222	68837809	68837962	68838061	68838222	2182	2,0,5	4,3,2	0,1,0	0,3,3	248	149	1	1	0.231,0.0,0.6	NA,0.167,0.0	0.193		620	ENSMUSG00000032280.17
1506	ENSMUSG00000037236.17	Matr3	chr18	+	35711468	35711510	35710610	35710672	35711957	35712061	1506	166163168	0,0,0	199178172	0,0,1	191	149	1	1	1.0,1.0,1.0	1.0,1.0,0.993	0.002		2185	ENSMUSG00000062753.15	AI413582	chr17	-	27783122	27783384	27783122	27783228	27783358	27783384	2185	14,9,20	3,4,1	16,8,20	2,4,3	279	149	0.838578	1	0.714,0.546,0.914	0.81,0.516,0.781	0.022		621	ENSMUSG00000032280.17
1507	ENSMUSG00000037236.17	Matr3	chr18	+	35714222	35714348	35712318	35712371	35714649	35714775	1507	272250333	1,0,0	321381349	5,3,1	275	149	0.698841	1	0.993,1.0,1.0	0.972,0.986,0.995	0.013		2186	ENSMUSG00000024560.8	Cxxc1	chr18	+	74352201	74352638	74352201	74352309	74352453	74352638	2186	9,3,3	15,22,26	0,8,6	20,32,23	293	149	0.575632	1	0.234,0.065,0.055	0.0,0.113,0.117	0.041		623	ENSMUSG00000029559.16
1508	ENSMUSG00000037236.17	Matr3	chr18	+	35714649	35714775	35714222	35714348	35714971	35715139	1508	276284351	0,0,0	336393378	0,0,1	275	149	1	1	1.0,1.0,1.0	1.0,1.0,0.995	0.002		2197	ENSMUSG00000017760.17	Ctsa	chr2	+	164675949	164676351	164675949	164676128	164676239	164676351	2197	3,7,2	14,17,15	4,9,3	28,11,23	260	149	0.902745	1	0.109,0.191,0.071	0.076,0.319,0.07	-0.031		624	ENSMUSG00000037364.13
1509	ENSMUSG00000037236.17	Matr3	chr18	+	35721384	35721506	35720683	35720906	35723432	35723517	1509	171138211	0,2,0	145145199	0,0,0	271	149	1	1	1.0,0.974,1.0	1.0,1.0,1.0	-0.009		2201	ENSMUSG00000037773.15	Pced1a	chr2	-	130264144	130264624	130264144	130264295	130264385	130264624	2201	7,1,2	1,0,2	4,2,2	0,2,0	239	149	0.650161	1	0.814,1.0,0.384	1.0,0.384,1.0	-0.062		625	ENSMUSG00000037364.13
1510	ENSMUSG00000024357.11	Sil1	chr18	-	35461255	35461359	35458336	35458528	35474150	35474250	1510	0,1,0	3,2,3	0,0,0	8,0,12	253	149	1	1	0.0,0.227,0.0	0.0,NA,0.0	0.076		2203	ENSMUSG00000006289.15	Osgep	chr14	-	51154256	51154960	51154256	51154322	51154839	51154960	2203	9,11,9	0,0,1	9,14,9	0,0,0	666	149	1	1	1.0,1.0,0.668	1.0,1.0,1.0	-0.111		632	ENSMUSG00000035696.16
1511	ENSMUSG00000024357.11	Sil1	chr18	-	35481692	35481813	35474150	35474250	35551109	35551248	1511	14,27,25	0,0,0	31,27,24	0,1,0	270	149	1	1	1.0,1.0,1.0	1.0,0.937,1.0	0.021		2204	ENSMUSG00000006289.15	Osgep	chr14	-	51154256	51154960	51154256	51154322	51154910	51154960	2204	9,13,10	0,0,0	9,17,10	1,0,0	737	149	1	1	1.0,1.0,1.0	0.645,1.0,1.0	0.118		634	ENSMUSG00000045466.19
1516	ENSMUSG00000024357.11	Sil1	chr18	-	35626197	35626286	35571362	35571433	35631843	35631930	1516	1,0,0	6,6,6	0,0,0	18,12,5	238	149	1	1	0.094,0.0,0.0	0.0,0.0,0.0	0.031		2207	ENSMUSG00000030727.13	Rabep2	chr7	+	126043694	126044108	126043694	126043750	126043991	126044108	2207	1,0,3	1,3,0	4,0,1	1,1,0	390	149	0.99065	1	0.276,0.0,1.0	0.604,0.0,1.0	-0.109		636	ENSMUSG00000039048.16
1517	ENSMUSG00000037815.8	Ctnna1	chr18	+	35271037	35271174	35251965	35252034	35285653	35285760	1517	0,0,1	23,21,45	0,0,0	37,38,50	286	149	1	1	0.0,0.0,0.011	0.0,0.0,0.0	0.004		2209	ENSMUSG00000066800.12	Rnasel	chr1	+	153635289	153636560	153635289	153635422	153636520	153636560	2209	1,3,0	0,0,0	0,6,0	1,0,0	1247	149	1	1	1.0,1.0,NA	0.0,1.0,NA	0.5		638	ENSMUSG00000052911.10
1519	ENSMUSG00000037815.8	Ctnna1	chr18	+	35307305	35307472	35285651	35285760	35308149	35308269	1519	149126151	0,2,0	161138170	0,0,0	316	149	1	1	1.0,0.967,1.0	1.0,1.0,1.0	-0.011		2212	ENSMUSG00000042404.17	Dennd4b	chr3	+	90185041	90185436	90185041	90185211	90185294	90185436	2212	0,0,2	8,1,8	2,1,0	5,3,2	232	149	0.763332	1	0.0,0.0,0.138	0.204,0.176,0.0	-0.081		642	ENSMUSG00000020288.14
1522	ENSMUSG00000024359.11	Hspa9	chr18	-	35071985	35072078	35071636	35071777	35072395	35072490	1522	178203319	0,0,0	319328386	0,0,1	242	149	1	1	1.0,1.0,1.0	1.0,1.0,0.996	0.001		2213	ENSMUSG00000021918.11	Nek4	chr14	+	30697717	30699536	30697717	30697784	30699402	30699536	2213	19,5,11	13,5,15	21,13,9	15,10,16	1767	149	0.960606	1	0.11,0.078,0.058	0.106,0.099,0.045	-0.001		643	ENSMUSG00000020288.14
1524	ENSMUSG00000038773.12	Kdm3b	chr18	+	34932337	34932412	34929840	34929965	34941293	34942542	1524	25,15,24	0,2,0	20,17,16	0,0,0	224	149	1	1	1.0,0.833,1.0	1.0,1.0,1.0	-0.056		2215	ENSMUSG00000026571.13	Dcaf6	chr1	-	165165756	165167592	165165756	165165913	165167453	165167592	2215	8,7,9	4,7,4	7,13,9	8,9,4	1689	149	0.870241	1	0.15,0.081,0.166	0.072,0.113,0.166	0.015		648	ENSMUSG00000038520.16
1526	ENSMUSG00000038773.12	Kdm3b	chr18	+	34941293	34942542	34936502	34937102	34943311	34943513	1526	301216369	1,0,0	345315373	0,0,0	1398	149	1	1	0.97,1.0,1.0	1.0,1.0,1.0	-0.01		2222	ENSMUSG00000045031.19	Cetn4	chr3	-	37364441	37366595	37364441	37364588	37366505	37366595	2222	0,5,4	1,0,0	1,3,2	0,0,0	2066	149	1	1	0.0,1.0,1.0	1.0,1.0,1.0	-0.333		649	ENSMUSG00000039178.10
1528	ENSMUSG00000038773.12	Kdm3b	chr18	+	34957754	34958011	34956484	34956764	34960391	34960658	1528	83,72,120	0,0,0	126103113	0,0,1	406	149	1	1	1.0,1.0,1.0	1.0,1.0,0.976	0.008		2223	ENSMUSG00000037318.11	Traf3ip3	chr1	-	192876827	192877157	192876827	192876857	192877132	192877157	2223	0,0,0	0,1,3	0,2,0	0,0,0	424	149	1	1	NA,0.0,0.0	NA,1.0,NA	-1		657	ENSMUSG00000053477.19
1529	ENSMUSG00000044201.11	Cdc25c	chr18	-	34873380	34873482	34871268	34871331	34876990	34877116	1529	45,28,53	0,0,2	54,39,32	3,0,1	251	149	0.641297	1	1.0,1.0,0.94	0.914,1.0,0.95	0.025		2226	ENSMUSG00000029472.14	Anapc5	chr5	-	122929670	122929997	122929670	122929798	122929889	122929997	2226	56,49,50	13,8,18	35,68,41	7,13,11	240	149	0.637978	1	0.728,0.792,0.633	0.756,0.765,0.698	-0.022		658	ENSMUSG00000001785.14
1530	ENSMUSG00000044201.11	Cdc25c	chr18	-	34873380	34873482	34871268	34871331	34880276	34880366	1530	31,18,31	1,0,1	36,28,11	0,0,0	251	149	1	1	0.948,1.0,0.948	1.0,1.0,1.0	-0.035		2228	ENSMUSG00000029472.14	Anapc5	chr5	-	122937401	122938656	122937401	122937537	122938513	122938656	2228	31,44,46	73,47,101	44,36,46	67,72,96	1125	149	0.89288	1	0.053,0.11,0.057	0.08,0.062,0.06	0.006		662	ENSMUSG00000002825.9
1532	ENSMUSG00000024370.18	Cdc23	chr18	-	34784442	34784515	34779954	34780092	34784599	34784788	1532	90,76,99	0,1,0	105130159	0,0,0	222	149	1	1	1.0,0.981,1.0	1.0,1.0,1.0	-0.006		2230	ENSMUSG00000036672.6	Cenpt	chr8	-	106571304	106571810	106571304	106571627	106571705	106571810	2230	2,2,1	8,11,7	3,3,1	9,7,8	227	149	0.603673	1	0.141,0.107,0.086	0.18,0.22,0.076	-0.047		664	ENSMUSG00000038429.11
1533	ENSMUSG00000003779.17	Kif20a	chr18	+	34762112	34762337	34761937	34762006	34762477	34762643	1533	121104167	0,0,1	131138179	0,0,0	374	149	1	1	1.0,1.0,0.985	1.0,1.0,1.0	-0.005		2234	ENSMUSG00000036672.6	Cenpt	chr8	-	106575818	106576153	106575818	106575955	106576056	106576153	2234	0,4,2	9,0,6	3,3,1	5,5,9	250	149	0.872949	1	0.0,1.0,0.166	0.263,0.263,0.062	0.193		666	ENSMUSG00000106864.4
1534	ENSMUSG00000003779.17	Kif20a	chr18	+	34762193	34762337	34761727	34762006	34762477	34762643	1534	149124213	0,0,1	164184237	0,0,0	293	149	1	1	1.0,1.0,0.991	1.0,1.0,1.0	-0.003		2235	ENSMUSG00000036672.6	Cenpt	chr8	-	106576257	106576555	106576257	106576345	106576464	106576555	2235	3,4,8	17,23,14	8,7,4	22,21,24	268	149	0.942128	1	0.089,0.088,0.241	0.168,0.156,0.085	0.003		667	ENSMUSG00000032827.16
1535	ENSMUSG00000003778.15	Brd8	chr18	-	34735255	34735300	34731667	34733294	34735724	34735829	1535	12,6,9	2,0,1	12,6,14	0,0,0	194	149	0.632215	1	0.822,1.0,0.874	1.0,1.0,1.0	-0.101		2242	ENSMUSG00000040272.15	Accs	chr2	-	93669492	93671731	93669492	93669582	93671653	93671731	2242	28,16,19	0,0,0	12,17,10	0,2,0	2220	149	0.589996	1	1.0,1.0,1.0	1.0,0.363,1.0	0.212		669	ENSMUSG00000027854.13
1536	ENSMUSG00000003778.15	Brd8	chr18	-	34739472	34739519	34738526	34738741	34739727	34739821	1536	50,34,51	2,0,0	52,56,47	2,2,0	196	149	0.594346	1	0.95,1.0,1.0	0.952,0.955,1.0	0.014		2246	ENSMUSG00000002108.11	Nr1h3	chr2	-	91020529	91020986	91020529	91020629	91020806	91020986	2246	1,0,3	4,1,1	0,0,0	0,0,1	326	149	1	1	0.103,0.0,0.578	NA,NA,0.0	0.227		671	ENSMUSG00000055850.13
1538	ENSMUSG00000003778.15	Brd8	chr18	-	34743462	34743681	34741470	34743002	34744184	34744321	1538	64,44,73	10,17,14	110,83,73	12,20,14	368	149	0.379362	1	0.722,0.512,0.679	0.788,0.627,0.679	-0.06		2248	ENSMUSG00000002108.11	Nr1h3	chr2	-	91020529	91021292	91020529	91020986	91021083	91021292	2248	0,1,0	2,1,0	0,1,0	0,3,0	246	149	1	1	0.0,0.377,NA	NA,0.168,NA	0.02		672	ENSMUSG00000004994.13
1540	ENSMUSG00000003778.15	Brd8	chr18	-	34749717	34749787	34746268	34746349	34756507	34756604	1540	2,3,8	0,0,1	8,5,1	0,0,0	219	149	1	1	1.0,1.0,0.845	1.0,1.0,1.0	-0.052		2251	ENSMUSG00000002109.15	Ddb2	chr2	-	91064452	91065296	91064452	91064644	91065159	91065296	2251	26,6,13	0,0,1	23,13,10	0,0,0	664	149	1	1	1.0,1.0,0.745	1.0,1.0,1.0	-0.085		674	ENSMUSG00000040687.17
1541	ENSMUSG00000003778.15	Brd8	chr18	-	34749717	34749787	34747800	34747850	34756507	34756604	1541	57,39,44	0,1,0	39,54,38	0,0,0	219	149	1	1	1.0,0.964,1.0	1.0,1.0,1.0	-0.012		2255	ENSMUSG00000033769.17	Exoc6b	chr6	-	84831682	84832528	84831682	84831780	84832456	84832528	2255	7,0,3	10,3,2	4,3,1	6,7,7	825	149	0.636954	1	0.112,0.0,0.213	0.107,0.072,0.025	0.04		676	ENSMUSG00000040687.17
1544	ENSMUSG00000036501.8	Fam13b	chr18	-	34592409	34592475	34590716	34590927	34595113	34595261	1544	0,5,0	26,7,21	1,1,1	11,7,10	215	149	0.222856	1	0.0,0.331,0.0	0.059,0.09,0.065	0.039		2257	ENSMUSG00000068735.15	Trp53i11	chr2	+	93029239	93029803	93029239	93029336	93029701	93029803	2257	0,2,2	9,7,18	2,1,1	11,15,12	514	149	0.941157	1	0.0,0.076,0.031	0.05,0.019,0.024	0.005		677	ENSMUSG00000040687.17
1545	ENSMUSG00000036501.8	Fam13b	chr18	-	34597215	34597389	34596013	34596062	34598208	34598273	1545	0,0,0	2,4,1	0,0,5	0,1,2	323	149	1	1	0.0,0.0,0.0	NA,0.0,0.536	-0.268		2258	ENSMUSG00000040310.13	Alx4	chr2	+	93505640	93511684	93505640	93505769	93507576	93511684	2258	71,56,39	36,24,56	75,79,43	34,51,49	1956	149	0.909846	1	0.131,0.151,0.05	0.144,0.106,0.063	0.006		678	ENSMUSG00000040687.17
1547	ENSMUSG00000036501.8	Fam13b	chr18	-	34624069	34624165	34620031	34620192	34627209	34627351	1547	1,5,4	3,4,10	2,0,5	1,1,5	245	149	0.929001	1	0.169,0.432,0.196	0.549,0.0,0.378	-0.043		2259	ENSMUSG00000038683.17	Pak1ip1	chr13	+	41162361	41162840	41162361	41162414	41162694	41162840	2259	8,4,4	14,27,43	5,4,6	15,21,42	429	149	0.747434	1	0.166,0.049,0.031	0.104,0.062,0.047	0.011		679	ENSMUSG00000040687.17
1548	ENSMUSG00000036501.8	Fam13b	chr18	-	34630386	34630599	34627651	34627829	34632738	34632905	1548	5,3,8	0,0,2	2,0,2	0,0,0	362	149	1	1	1.0,1.0,0.622	1.0,NA,1.0	-0.126		2262	ENSMUSG00000027193.13	Api5	chr2	-	94257277	94257922	94257277	94257429	94257856	94257922	2262	2,9,9	115100139	0,16,5	85134145	576	149	1	1	0.004,0.023,0.016	0.0,0.03,0.009	0.001		680	ENSMUSG00000040687.17
1549	ENSMUSG00000036501.8	Fam13b	chr18	-	34631020	34631212	34630386	34630599	34632738	34632905	1549	17,11,8	0,0,1	13,7,7	0,0,0	341	149	1	1	1.0,1.0,0.778	1.0,1.0,1.0	-0.074		2267	ENSMUSG00000035245.13	Eogt	chr6	-	97124837	97125219	97124837	97124969	97125151	97125219	2267	6,6,7	0,0,0	8,6,5	0,2,0	331	149	1	1	1.0,1.0,1.0	1.0,0.575,1.0	0.142		683	ENSMUSG00000041147.11
1551	ENSMUSG00000005873.7	Reep5	chr18	-	34490144	34490283	34482687	34482856	34505457	34505551	1551	28,28,44	0,0,2	31,45,40	0,0,0	288	149	1	1	1.0,1.0,0.919	1.0,1.0,1.0	-0.027		2270	ENSMUSG00000027185.16	Nat10	chr2	-	103556008	103556584	103556008	103556107	103556464	103556584	2270	16,14,6	0,6,4	33,24,16	5,4,12	506	149	0.766272	1	1.0,0.407,0.306	0.66,0.639,0.282	0.044		686	ENSMUSG00000029471.14
1554	ENSMUSG00000014504.17	Srp19	chr18	+	34464802	34464878	34464197	34464312	34467509	34467621	1554	1,5,11	2,0,5	5,6,6	0,4,3	225	149	0.974895	1	0.249,1.0,0.593	1.0,0.498,0.57	-0.075		2272	ENSMUSG00000027185.16	Nat10	chr2	-	103564719	103565335	103564719	103564870	103565262	103565335	2272	15,19,26	0,1,1	13,31,23	0,0,1	541	149	1	1	1.0,0.84,0.877	1.0,1.0,0.864	-0.049		690	ENSMUSG00000000738.19
1555	ENSMUSG00000014504.17	Srp19	chr18	+	34464802	34467417	34464197	34464312	34467509	34467621	1555	64,45,72	2,0,5	68,70,51	0,4,3	2764	149	0.945433	1	0.633,1.0,0.437	1.0,0.485,0.478	0.036		2273	ENSMUSG00000028073.16	Pear1	chr3	-	87659778	87660143	87659778	87659907	87660014	87660143	2273	1,0,0	0,1,1	1,0,0	0,0,2	256	149	1	1	1.0,0.0,0.0	1.0,NA,0.0	-0.167		691	ENSMUSG00000029673.20
1557	ENSMUSG00000014504.17	Srp19	chr18	+	34467345	34467417	34464175	34464312	34467509	34467621	1557	34,18,40	2,0,5	24,27,20	0,4,3	221	149	0.731131	1	0.92,1.0,0.844	1.0,0.82,0.818	0.042		2275	ENSMUSG00000040331.17	Nsmce4a	chr7	-	130135306	130135591	130135306	130135396	130135499	130135591	2275	4,12,5	24,14,22	4,8,9	22,22,25	252	149	0.820377	1	0.09,0.336,0.118	0.097,0.177,0.176	0.031		692	ENSMUSG00000029673.20
1558	ENSMUSG00000014504.17	Srp19	chr18	+	34467345	34467417	34464802	34464878	34467509	34467621	1558	49,34,74	0,5,4	43,47,44	3,5,2	221	149	0.827596	1	1.0,0.821,0.926	0.906,0.864,0.937	0.013		2282	ENSMUSG00000022220.15	Adcy4	chr14	-	56007248	56007589	56007248	56007363	56007481	56007589	2282	1,0,1	0,4,1	0,1,0	1,2,0	267	149	1	1	1.0,0.0,0.358	0.0,0.218,NA	0.344		694	ENSMUSG00000029673.20
1559	ENSMUSG00000024376.8	Epb41l4a	chr18	-	34054882	34054987	34024477	34024529	34139037	34139475	1559	5,0,15	1,2,0	14,3,12	0,2,0	254	149	0.229561	1	0.746,0.0,1.0	1.0,0.468,1.0	-0.241		2283	ENSMUSG00000022220.15	Adcy4	chr14	-	56010117	56011016	56010117	56010243	56010878	56011016	2283	0,0,1	0,0,2	0,2,1	1,1,2	784	149	1	1	NA,NA,0.087	0.0,0.275,0.087	-0.034		695	ENSMUSG00000020362.14
1560	ENSMUSG00000024378.10	Stard4	chr18	-	33338103	33338218	33332407	33336868	33339172	33339299	1560	41,24,42	3,0,2	61,33,48	1,1,2	264	149	0.718314	1	0.885,1.0,0.922	0.972,0.949,0.931	-0.015		2284	ENSMUSG00000022220.15	Adcy4	chr14	-	56016098	56016519	56016098	56016257	56016391	56016519	2284	0,0,0	0,2,2	0,1,0	1,3,0	283	149	1	1	NA,0.0,0.0	0.0,0.149,NA	-0.074		697	ENSMUSG00000024989.16
1561	ENSMUSG00000024378.10	Stard4	chr18	-	33338273	33338378	33336457	33336868	33339172	33339299	1561	5,4,8	3,0,2	1,4,7	1,1,2	254	149	0.812201	1	0.494,1.0,0.701	0.37,0.701,0.672	0.151		2288	ENSMUSG00000004562.17	Arhgef40	chr14	+	52224859	52227395	52224859	52225057	52226158	52227395	2288	28,18,17	3,4,9	18,21,15	3,3,8	1250	149	0.956612	1	0.527,0.349,0.184	0.417,0.455,0.183	0.002		699	ENSMUSG00000024989.16
1562	ENSMUSG00000038299.17	Wdr36	chr18	+	32998905	32998971	32997705	32997893	32999240	32999453	1562	16,17,16	0,0,0	22,22,27	0,1,0	215	149	1	1	1.0,1.0,1.0	1.0,0.938,1.0	0.021		2293	ENSMUSG00000027615.15	Hps3	chr3	-	20066860	20068367	20066860	20067094	20068186	20068367	2293	9,6,12	2,0,4	10,19,10	5,2,0	1241	149	0.749022	1	0.351,1.0,0.265	0.194,0.533,1.0	-0.037		700	ENSMUSG00000004768.15
1563	ENSMUSG00000090523.3	Gypc	chr18	-	32665786	32665837	32661374	32663254	32692838	32693087	1563	10,2,13	0,0,0	6,8,1	0,2,0	200	149	1	1	1.0,1.0,1.0	1.0,0.749,1.0	0.084		2295	ENSMUSG00000027615.15	Hps3	chr3	-	20084477	20084969	20084477	20084573	20084722	20084969	2295	6,3,6	0,0,0	5,8,5	1,0,0	298	149	1	1	1.0,1.0,1.0	0.714,1.0,1.0	0.095		703	ENSMUSG00000004455.17
1564	ENSMUSG00000024381.17	Bin1	chr18	+	32547997	32548090	32547235	32547343	32552895	32552981	1564	4,14,9	8,14,8	17,8,3	14,10,11	242	149	0.69142	1	0.235,0.381,0.409	0.428,0.33,0.144	0.041		2297	ENSMUSG00000035458.16	Tnni3	chr7	-	4524814	4525081	4524814	4524901	4525068	4525081	2297	0,0,0	2,0,3	0,3,0	2,0,2	316	149	1	1	0.0,NA,0.0	0.0,1.0,0.0	-0.333		705	ENSMUSG00000020454.18
1565	ENSMUSG00000024381.17	Bin1	chr18	+	32557872	32558020	32554930	32555013	32565035	32565146	1565	40,55,78	0,0,1	50,80,72	0,0,0	297	149	1	1	1.0,1.0,0.975	1.0,1.0,1.0	-0.008		2299	ENSMUSG00000024194.17	Cuta	chr17	-	27157391	27157760	27157391	27157441	27157700	27157760	2299	6,5,9	2,0,0	8,3,6	0,0,0	408	149	0.812231	1	0.523,1.0,1.0	1.0,1.0,1.0	-0.159		706	ENSMUSG00000020454.18
1566	ENSMUSG00000024381.17	Bin1	chr18	+	32559276	32559405	32557872	32558020	32564723	32564795	1566	16,12,21	2,9,4	39,10,23	6,12,6	278	149	0.663992	1	0.811,0.417,0.738	0.777,0.309,0.673	0.069		2300	ENSMUSG00000024194.17	Cuta	chr17	-	27157391	27157760	27157391	27157591	27157700	27157760	2300	14,8,12	4,2,13	10,9,11	4,5,9	258	149	0.707602	1	0.669,0.698,0.348	0.591,0.51,0.414	0.067		707	ENSMUSG00000023908.9
1567	ENSMUSG00000024381.17	Bin1	chr18	+	32559276	32559405	32557872	32558020	32565035	32565146	1567	14,7,14	17,11,15	28,17,18	13,26,24	278	149	0.491993	1	0.306,0.254,0.333	0.536,0.26,0.287	-0.063		2303	ENSMUSG00000040111.18	Gramd1b	chr9	-	40204528	40209375	40204528	40205723	40209281	40209375	2303	32,38,28	1,0,0	44,56,28	0,0,0	3707	149	1	1	0.563,1.0,1.0	1.0,1.0,1.0	-0.146		710	ENSMUSG00000068290.12
1568	ENSMUSG00000024381.17	Bin1	chr18	+	32564723	32564795	32557872	32558020	32565035	32565146	1568	44,35,39	17,11,15	44,46,42	13,26,24	221	149	0.32088	1	0.636,0.682,0.637	0.695,0.544,0.541	0.058		2304	ENSMUSG00000072980.4	Oip5	chr2	-	119448334	119448950	119448334	119448401	119448638	119448950	2304	7,8,0	31,22,45	5,12,5	62,33,35	386	149	0.67756	1	0.08,0.123,0.0	0.03,0.123,0.052	-0.001		712	ENSMUSG00000028295.15
1569	ENSMUSG00000024381.17	Bin1	chr18	+	32564723	32564795	32559276	32559405	32565035	32565146	1569	47,32,45	3,1,4	50,36,51	1,9,6	221	149	0.138235	1	0.914,0.956,0.884	0.971,0.729,0.851	0.068		2306	ENSMUSG00000041506.16	Rrp9	chr9	+	106360110	106360410	106360110	106360235	106360317	106360410	2306	0,0,0	12,19,25	0,2,3	16,24,26	231	149	0.579002	1	0.0,0.0,0.0	0.0,0.051,0.069	-0.04		713	ENSMUSG00000061288.14
1570	ENSMUSG00000024382.14	Ercc3	chr18	+	32394354	32394451	32390242	32390445	32397600	32397718	1570	50,43,44	0,1,0	46,52,55	0,0,0	246	149	1	1	1.0,0.963,1.0	1.0,1.0,1.0	-0.012		2307	ENSMUSG00000029389.18	Ddx55	chr5	+	124692733	124694911	124692733	124692820	124694819	124694911	2307	46,46,52	4,2,3	52,60,34	1,5,3	2148	149	0.957017	1	0.444,0.615,0.546	0.783,0.454,0.44	-0.024		714	ENSMUSG00000068748.8
1573	ENSMUSG00000024258.5	Polr2d	chr18	+	31928340	31928436	31924892	31925073	31929102	31929754	1573	84,77,105	2,2,2	54,99,121	0,8,4	245	149	0.138573	1	0.962,0.959,0.97	1.0,0.883,0.948	0.02		2309	ENSMUSG00000000223.14	Drp2	chrX	+	133341083	133342135	133341083	133341169	133341977	133342135	2309	0,1,0	2,0,3	0,1,0	0,0,0	957	149	1	1	0.0,1.0,0.0	NA,1.0,NA	-0.667		715	ENSMUSG00000029524.17
1574	ENSMUSG00000024260.15	Sap130	chr18	+	31807407	31807549	31799957	31800062	31810408	31810530	1574	125106180	1,0,0	133151143	0,0,0	291	149	1	1	0.985,1.0,1.0	1.0,1.0,1.0	-0.005		2321	ENSMUSG00000037740.9	Mrps26	chr2	+	130406000	130406351	130406000	130406147	130406227	130406351	2321	4,3,2	4,1,14	4,7,3	7,9,10	229	149	0.943379	1	0.394,0.661,0.085	0.271,0.336,0.163	0.123		719	ENSMUSG00000047036.9
1575	ENSMUSG00000024260.15	Sap130	chr18	+	31822450	31822555	31815059	31815237	31831574	31831933	1575	48,49,97	0,0,0	38,89,85	0,0,1	254	149	1	1	1.0,1.0,1.0	1.0,1.0,0.98	0.007		2331	ENSMUSG00000027246.13	Ell3	chr2	-	121270596	121270907	121270596	121270639	121270714	121270907	2331	1,0,1	0,3,1	0,7,2	0,1,0	224	149	1	1	1.0,0.0,0.399	NA,0.823,1.0	-0.445		730	ENSMUSG00000052926.17
1578	ENSMUSG00000024268.17	Celf4	chr18	-	25624137	25624281	25619850	25620022	25629278	25629359	1578	0,1,0	0,1,0	0,1,0	0,0,0	293	149	1	1	NA,0.337,NA	NA,1.0,NA	-0.663		2335	ENSMUSG00000002486.16	Tchp	chr5	+	114857639	114858329	114857639	114857825	114858185	114858329	2335	7,4,5	5,2,4	8,5,2	2,3,8	509	149	0.97599	1	0.291,0.369,0.268	0.539,0.328,0.068	-0.002		731	ENSMUSG00000056531.12
1579	ENSMUSG00000024268.17	Celf4	chr18	-	25624197	25624281	25619850	25620022	25629278	25629359	1579	0,0,0	0,1,0	0,1,0	0,0,0	233	149	1	1	NA,0.0,NA	NA,1.0,NA	-1		2339	ENSMUSG00000029103.17	Lrpap1	chr5	-	35254874	35255617	35254874	35255033	35255496	35255617	2339	1,3,5	11,12,20	4,5,0	18,11,21	612	149	0.854319	1	0.022,0.057,0.057	0.051,0.1,0.0	-0.005		733	ENSMUSG00000029267.18
1580	ENSMUSG00000024271.9	Elp2	chr18	+	24742686	24742757	24739913	24739992	24744969	24745126	1580	62,61,62	1,0,0	63,83,61	0,2,2	220	149	0.427109	1	0.977,1.0,1.0	1.0,0.966,0.954	0.019		2342	ENSMUSG00000000486.14	Septin1	chr7	-	126816790	126817229	126816790	126816914	126817142	126817229	2342	3,0,0	2,0,0	5,1,3	0,3,0	377	149	1	1	0.372,NA,NA	1.0,0.116,1.0	-0.333		735	ENSMUSG00000029267.18
1581	ENSMUSG00000024271.9	Elp2	chr18	+	24748217	24748284	24747472	24747537	24748945	24749083	1581	48,46,34	0,0,0	75,69,80	0,1,4	216	149	0.559408	1	1.0,1.0,1.0	1.0,0.979,0.932	0.03		2343	ENSMUSG00000027381.17	Bcl2l11	chr2	+	127970539	127970934	127970539	127970676	127970844	127970934	2343	41,28,36	18,3,8	42,36,41	14,6,10	317	149	0.954518	1	0.517,0.814,0.679	0.585,0.738,0.658	0.01		737	ENSMUSG00000048264.17
1582	ENSMUSG00000024271.9	Elp2	chr18	+	24750457	24750553	24745504	24745582	24752134	24752235	1582	64,54,98	0,0,0	74,72,88	0,1,0	245	149	1	1	1.0,1.0,1.0	1.0,0.978,1.0	0.007		2345	ENSMUSG00000020486.20	Septin4	chr11	+	87479543	87479911	87479543	87479678	87479793	87479911	2345	0,0,0	0,0,1	0,8,0	0,0,1	264	149	1	1	NA,NA,0.0	NA,1.0,0.0	-0.5		738	ENSMUSG00000039985.15
1583	ENSMUSG00000024271.9	Elp2	chr18	+	24752438	24752570	24752134	24752235	24755135	24755294	1583	157127183	3,1,0	145179174	0,0,5	281	149	0.653158	1	0.965,0.985,1.0	1.0,1.0,0.949	0		2346	ENSMUSG00000020486.20	Septin4	chr11	+	87480481	87480881	87480481	87480644	87480781	87480881	2346	2,3,0	0,0,0	2,0,2	2,0,0	286	149	1	1	1.0,1.0,NA	0.343,NA,1.0	0.329		742	ENSMUSG00000035266.17
1584	ENSMUSG00000024270.12	Slc39a6	chr18	-	24733871	24734696	24732286	24732470	24736343	24736874	1584	235202271	1,0,0	226271293	0,2,0	974	149	1	1	0.973,1.0,1.0	1.0,0.954,1.0	0.006		2349	ENSMUSG00000027405.17	Nop56	chr2	+	130117582	130118094	130117582	130117744	130117895	130118094	2349	32,10,22	259271430	21,21,32	321351410	300	149	0.935953	1	0.058,0.018,0.025	0.031,0.029,0.037	0.001		743	ENSMUSG00000035266.17
1585	ENSMUSG00000024273.9	2700062C07Rik	chr18	+	24604118	24604141	24603925	24604037	24606006	24606206	1585	7,2,14	3,0,1	10,9,14	0,0,2	172	149	0.193869	1	0.669,1.0,0.924	1.0,1.0,0.858	-0.088		2350	ENSMUSG00000024442.7	Dele1	chr18	+	38385873	38387122	38385873	38386018	38386960	38387122	2350	7,20,8	25,18,26	17,19,13	28,35,31	1091	149	0.867498	1	0.037,0.132,0.04	0.077,0.069,0.054	0.003		745	ENSMUSG00000118665.1
1587	ENSMUSG00000024273.9	2700062C07Rik	chr18	+	24604118	24604203	24603906	24604037	24606006	24606206	1587	1,0,1	3,0,1	0,3,0	0,0,2	234	149	1	1	0.175,NA,0.389	NA,1.0,0.0	-0.218		2351	ENSMUSG00000027937.16	Jtb	chr3	+	90139501	90139818	90139501	90139539	90139735	90139818	2351	6,9,20	4,3,30	19,7,7	8,9,7	345	149	0.824085	1	0.393,0.564,0.224	0.506,0.251,0.302	0.041		749	ENSMUSG00000020160.19
1589	ENSMUSG00000024273.9	2700062C07Rik	chr18	+	24606006	24606206	24603907	24604141	24608581	24608781	1589	21,14,28	0,0,0	21,29,38	0,0,1	349	149	1	1	1.0,1.0,1.0	1.0,1.0,0.942	0.019		2353	ENSMUSG00000074796.11	Slc4a11	chr2	-	130527150	130527583	130527150	130527324	130527414	130527583	2353	0,0,0	2,0,0	0,2,0	0,0,0	239	149	1	1	0.0,NA,NA	NA,1.0,NA	-1		751	ENSMUSG00000041890.18
1590	ENSMUSG00000051469.15	Zfp24	chr18	-	24150340	24150488	24142758	24147742	24150724	24151225	1590	60,75,83	0,0,0	66,71,84	0,0,1	297	149	1	1	1.0,1.0,1.0	1.0,1.0,0.977	0.008		2366	ENSMUSG00000023495.14	Pcbp4	chr9	+	106339387	106339613	106339387	106339451	106339560	106339613	2366	20,21,18	157104186	21,19,20	158175163	258	149	0.669388	1	0.069,0.104,0.053	0.071,0.059,0.066	0.01		752	ENSMUSG00000031985.10
1593	ENSMUSG00000024302.17	Dtna	chr18	+	23668218	23668286	23630535	23630760	23678742	23678782	1593	20,21,25	1,0,0	29,13,24	0,0,0	217	149	1	1	0.932,1.0,1.0	1.0,1.0,1.0	-0.023		2367	ENSMUSG00000042042.15	Csgalnact2	chr6	-	118101272	118103299	118101272	118101374	118103082	118103299	2367	6,6,7	2,2,3	7,4,7	4,2,1	1857	149	0.573048	1	0.194,0.194,0.158	0.123,0.138,0.36	-0.025		753	ENSMUSG00000031985.10
1594	ENSMUSG00000024302.17	Dtna	chr18	+	23676187	23676469	23668218	23668286	23678742	23678791	1594	0,0,4	17,14,13	1,0,0	16,8,13	431	149	0.683217	1	0.0,0.0,0.096	0.021,0.0,0.0	0.025		2372	ENSMUSG00000095567.9	Noc2l	chr4	+	156321799	156322185	156321799	156321974	156322056	156322185	2372	5,11,0	16,10,33	4,7,7	22,37,38	231	149	0.605656	1	0.168,0.415,0.0	0.105,0.109,0.106	0.088		754	ENSMUSG00000042726.15
1595	ENSMUSG00000024302.17	Dtna	chr18	+	23678742	23678823	23668218	23668286	23702618	23702832	1595	31,31,31	0,0,2	36,25,23	0,0,0	230	149	1	1	1.0,1.0,0.909	1.0,1.0,1.0	-0.03		2373	ENSMUSG00000095567.9	Noc2l	chr4	+	156327022	156328080	156327022	156327134	156327966	156328080	2373	51,47,67	84,53,83	80,70,59	99,65,105	981	149	0.794933	1	0.084,0.119,0.109	0.109,0.141,0.079	-0.006		755	ENSMUSG00000042726.15
1600	ENSMUSG00000042680.9	Garem1	chr18	-	21280788	21281961	21261543	21264556	21301792	21301923	1600	120,53,91	1,0,0	65102102	0,0,0	1322	149	1	1	0.931,1.0,1.0	1.0,1.0,1.0	-0.023		2374	ENSMUSG00000079334.9	Naa80	chr9	+	107456298	107458134	107456298	107456584	107457655	107458134	2374	18,17,28	0,0,0	22,20,20	1,0,0	1220	149	1	1	1.0,1.0,1.0	0.729,1.0,1.0	0.09		756	ENSMUSG00000042726.15
1601	ENSMUSG00000024317.16	Rnf138	chr18	+	21141781	21141947	21134964	21135226	21150875	21150932	1601	4,8,7	2,0,1	14,3,10	0,1,0	315	149	0.526665	1	0.486,1.0,0.768	1.0,0.587,1.0	-0.111		2376	ENSMUSG00000039308.7	Ndst2	chr14	-	20774528	20774888	20774528	20774631	20774815	20774888	2376	6,8,3	0,0,0	6,6,3	1,0,0	333	149	1	1	1.0,1.0,1.0	0.729,1.0,1.0	0.09		757	ENSMUSG00000042726.15
1602	ENSMUSG00000024317.16	Rnf138	chr18	+	21143733	21143849	21141781	21141947	21150875	21150932	1602	46,38,59	0,1,0	48,48,55	0,0,0	265	149	1	1	1.0,0.955,1.0	1.0,1.0,1.0	-0.015		2377	ENSMUSG00000030357.11	Fkbp4	chr6	-	128410488	128410756	128410488	128410572	128410665	128410756	2377	8,8,10	79,68,151	12,6,12	78,98,123	242	149	0.631642	1	0.059,0.068,0.039	0.087,0.036,0.057	-0.005		758	ENSMUSG00000029385.15
1603	ENSMUSG00000024317.16	Rnf138	chr18	+	21150875	21150932	21134964	21135226	21153944	21154056	1603	4,1,2	0,1,0	2,7,2	0,0,0	206	149	1	1	1.0,0.42,1.0	1.0,1.0,1.0	-0.193		2378	ENSMUSG00000027438.15	Napb	chr2	-	148549078	148551353	148549078	148549125	148551236	148551353	2378	8,14,13	1,0,0	27,21,5	0,0,0	2260	149	1	1	0.345,1.0,1.0	1.0,1.0,1.0	-0.218		759	ENSMUSG00000046711.17
1604	ENSMUSG00000024317.16	Rnf138	chr18	+	21150875	21150932	21143733	21143849	21153944	21154056	1604	31,22,40	3,7,6	33,39,27	10,2,12	206	149	0.449613	1	0.882,0.694,0.828	0.705,0.934,0.619	0.049		2383	ENSMUSG00000024019.19	Cmtr1	chr17	+	29917611	29918262	29917611	29917703	29918193	29918262	2383	26,20,19	15,18,16	38,11,36	23,20,24	639	149	0.827052	1	0.288,0.206,0.217	0.278,0.114,0.259	0.02		760	ENSMUSG00000046711.17
1605	ENSMUSG00000024317.16	Rnf138	chr18	+	21153944	21154056	21143733	21143849	21157465	21157573	1605	4,7,7	0,0,1	11,6,14	0,0,0	261	149	1	1	1.0,1.0,0.8	1.0,1.0,1.0	-0.067		2386	ENSMUSG00000001416.14	Cct3	chr3	+	88206648	88208298	88206648	88206710	88208106	88208298	2386	40,44,49	179210310	51,60,45	197305295	1545	149	0.87534	1	0.021,0.02,0.015	0.024,0.019,0.014	0		761	ENSMUSG00000046711.17
1607	ENSMUSG00000056124.6	B4galt6	chr18	-	20833795	20833912	20825448	20825636	20839461	20839586	1607	22,30,52	0,0,0	46,29,44	1,0,0	266	149	1	1	1.0,1.0,1.0	0.963,1.0,1.0	0.012		2392	ENSMUSG00000074064.7	Mlycd	chr8	+	120128219	120129329	120128219	120128332	120129172	120129329	2392	0,3,0	1,0,0	4,5,0	9,2,2	989	149	1	1	0.0,1.0,NA	0.063,0.274,0.0	0.388		762	ENSMUSG00000046711.17
1608	ENSMUSG00000024331.12	Dsc2	chr18	-	20165546	20165592	20163689	20165460	20166118	20166379	1608	5,0,0	1,0,3	0,6,0	2,2,1	195	149	1	1	0.793,NA,0.0	0.0,0.696,0.0	0.165		2393	ENSMUSG00000001588.13	Acap1	chr11	-	69775147	69775506	69775147	69775317	69775411	69775506	2393	0,1,0	0,0,0	0,0,0	0,0,3	243	149	1	1	NA,1.0,NA	NA,NA,0.0	1		764	ENSMUSG00000029502.15
1609	ENSMUSG00000024331.12	Dsc2	chr18	-	20167641	20167766	20164399	20166379	20168332	20168569	1609	9,4,16	0,0,0	7,13,11	0,2,0	274	149	1	1	1.0,1.0,1.0	1.0,0.779,1.0	0.074		2396	ENSMUSG00000039660.17	Spout1	chr2	-	30065198	30065824	30065198	30065301	30065725	30065824	2396	8,4,8	15,7,40	6,9,7	24,20,26	573	149	0.954126	1	0.122,0.129,0.049	0.061,0.105,0.065	0.023		765	ENSMUSG00000029502.15
1619	ENSMUSG00000036225.16	Kctd1	chr18	-	15140752	15140931	15115777	15119537	15284372	15284503	1619	35,71,85	0,0,0	39,94,81	0,1,0	328	149	1	1	1.0,1.0,1.0	1.0,0.977,1.0	0.008		2401	ENSMUSG00000005881.14	Ergic3	chr2	+	155859716	155860199	155859716	155859772	155859990	155860199	2401	12,8,10	137150246	18,11,5	201195229	367	149	0.890073	1	0.034,0.021,0.016	0.035,0.022,0.009	0.002		766	ENSMUSG00000048668.17
1627	ENSMUSG00000024921.18	Smarca2	chr19	+	26727251	26727347	26725588	26725740	26729223	26729441	1627	1,5,4	0,0,0	1,1,1	0,0,1	245	149	1	1	1.0,1.0,1.0	1.0,1.0,0.378	0.207		2405	ENSMUSG00000090862.4	Rps13	chr7	-	115932163	115933009	115932163	115932333	115932930	115933009	2405	179173261	407370626	219256264	487533692	746	149	0.927209	1	0.081,0.085,0.077	0.082,0.088,0.071	0.001		767	ENSMUSG00000060961.17
1628	ENSMUSG00000024921.18	Smarca2	chr19	+	26727251	26727347	26725798	26725944	26729223	26729441	1628	5,6,13	1,0,0	2,7,2	0,1,0	245	149	1	1	0.753,1.0,1.0	1.0,0.81,1.0	-0.019		2410	ENSMUSG00000085385.8	Snhg17	chr2	-	158201101	158202519	158201101	158201251	158202383	158202519	2410	111,98,125	0,0,1	110,98,120	0,0,3	1281	149	0.799255	1	1.0,1.0,0.936	1.0,1.0,0.823	0.038		768	ENSMUSG00000004815.13
1629	ENSMUSG00000024921.18	Smarca2	chr19	+	26727251	26727347	26725801	26725903	26729223	26729441	1629	1,5,4	1,0,0	1,1,1	0,0,0	245	149	1	1	0.378,1.0,1.0	1.0,1.0,1.0	-0.207		2412	ENSMUSG00000040928.16	S100pbp	chr4	-	129073981	129075633	129073981	129074064	129075534	129075633	2412	32,33,30	9,5,8	34,52,35	8,6,10	1619	149	0.682627	1	0.247,0.378,0.257	0.281,0.444,0.244	-0.029		770	ENSMUSG00000036120.11
1632	ENSMUSG00000024921.18	Smarca2	chr19	+	26727251	26727347	26725805	26726352	26729223	26729441	1632	1,5,4	0,1,0	1,1,1	0,0,0	245	149	1	1	1.0,0.753,1.0	1.0,1.0,1.0	-0.082		2413	ENSMUSG00000040928.16	S100pbp	chr4	-	129075534	129076325	129075534	129075633	129075759	129076325	2413	25,25,44	2,0,0	31,38,35	1,0,0	275	149	1	1	0.871,1.0,1.0	0.944,1.0,1.0	-0.024		771	ENSMUSG00000069601.15
1634	ENSMUSG00000024921.18	Smarca2	chr19	+	26728521	26728556	26727251	26727347	26729223	26729381	1634	2,0,0	6,7,15	0,0,0	3,4,3	184	149	1	1	0.213,0.0,0.0	0.0,0.0,0.0	0.071		2414	ENSMUSG00000040928.16	S100pbp	chr4	-	129075759	129076325	129075759	129075893	129076001	129076325	2414	21,26,30	1,0,0	33,40,46	1,0,1	257	149	1	1	0.924,1.0,1.0	0.95,1.0,0.964	0.003		773	ENSMUSG00000024293.17
1636	ENSMUSG00000024921.18	Smarca2	chr19	+	26737277	26737331	26729223	26729441	26748337	26748443	1636	2,3,3	14,10,9	0,6,0	10,5,15	203	149	0.507163	1	0.095,0.18,0.197	0.0,0.468,0.0	0.001		2418	ENSMUSG00000005774.13	Rfx5	chr3	+	94863797	94864113	94863797	94863917	94864031	94864113	2418	6,2,0	1,2,1	1,4,3	7,5,1	263	149	0.584649	1	0.773,0.362,0.0	0.075,0.312,0.63	0.039		774	ENSMUSG00000024293.17
1643	ENSMUSG00000024420.10	Zfp521	chr18	-	13950294	13950376	13850672	13850804	13976838	13978100	1643	13,13,18	0,0,3	18,4,23	0,0,0	231	149	0.698638	1	1.0,1.0,0.795	1.0,1.0,1.0	-0.068		2423	ENSMUSG00000002799.7	Jag2	chr12	-	112879224	112879613	112879224	112879338	112879499	112879613	2423	2,4,0	5,3,3	0,1,1	0,2,4	310	149	1	1	0.161,0.391,0.0	NA,0.194,0.107	0.034		776	ENSMUSG00000019087.14
1644	ENSMUSG00000024420.10	Zfp521	chr18	-	13950294	13950379	13850672	13850804	13976838	13980191	1644	35,26,49	0,0,3	45,29,53	0,0,0	234	149	0.667202	1	1.0,1.0,0.912	1.0,1.0,1.0	-0.029		2424	ENSMUSG00000002799.7	Jag2	chr12	-	112880223	112880559	112880223	112880343	112880428	112880559	2424	0,0,0	0,7,1	0,0,3	2,8,10	234	149	1	1	NA,0.0,0.0	0.0,0.0,0.16	-0.053		778	ENSMUSG00000036377.20
1645	ENSMUSG00000024420.10	Zfp521	chr18	-	13976838	13980191	13950294	13950379	14072018	14072198	1645	110310981069	0,0,0	119512871191	0,2,0	3502	149	1	1	1.0,1.0,1.0	1.0,0.965,1.0	0.012		2425	ENSMUSG00000021661.17	Ankra2	chr13	+	98409279	98410426	98409279	98409360	98409885	98410426	2425	6,9,7	2,0,0	5,4,9	0,0,0	674	149	0.63777	1	0.399,1.0,1.0	1.0,1.0,1.0	-0.2		779	ENSMUSG00000031521.6
1647	ENSMUSG00000024420.10	Zfp521	chr18	-	14104420	14104461	14072018	14072198	14105557	14105605	1647	29,18,22	1,0,0	12,32,21	1,0,2	190	149	0.695807	1	0.958,1.0,1.0	0.904,1.0,0.892	0.054		2439	ENSMUSG00000039536.17	Stau1	chr2	-	166792700	166793020	166792700	166792774	166792859	166793020	2439	145117182	1,1,1	118129164	2,0,2	234	149	1	1	0.989,0.987,0.991	0.974,1.0,0.981	0.004		780	ENSMUSG00000063511.12
1654	ENSMUSG00000044252.19	Osbpl1a	chr18	-	12974240	12974403	12952561	12952718	12995163	12995297	1654	11,3,22	0,4,1	15,22,20	2,0,2	312	149	0.44992	1	1.0,0.264,0.913	0.782,1.0,0.827	-0.144		2441	ENSMUSG00000029632.8	Ndufa4	chr6	-	11905200	11906107	11905200	11905261	11906018	11906107	2441	0,6,7	262220391	2,4,6	255349337	906	149	1	1	0.0,0.004,0.003	0.001,0.002,0.003	0		782	ENSMUSG00000024530.9
1655	ENSMUSG00000044252.19	Osbpl1a	chr18	-	12974240	12974403	12952561	12952718	12996128	12996497	1655	12,2,19	0,0,0	18,14,20	0,0,1	312	149	1	1	1.0,1.0,1.0	1.0,1.0,0.905	0.032		2446	ENSMUSG00000011096.18	Akt1s1	chr7	+	44503203	44503532	44503203	44503281	44503362	44503532	2446	0,0,0	20,31,42	4,0,0	11,33,34	230	149	0.64672	1	0.0,0.0,0.0	0.191,0.0,0.0	-0.064		786	ENSMUSG00000029211.12
1656	ENSMUSG00000044252.19	Osbpl1a	chr18	-	12974240	12974403	12952561	12952718	12996199	12996437	1656	12,3,18	0,0,0	15,13,19	2,2,0	312	149	0.173048	1	1.0,1.0,1.0	0.782,0.756,1.0	0.154		2453	ENSMUSG00000030057.16	Cnbp	chr6	-	87822103	87822775	87822103	87822539	87822637	87822775	2453	20,30,17	463374611	22,35,36	540599677	247	149	0.603351	1	0.025,0.046,0.017	0.024,0.034,0.031	0		790	ENSMUSG00000028644.18
1657	ENSMUSG00000044252.19	Osbpl1a	chr18	-	12974240	12974403	12952561	12952718	13004134	13004241	1657	19,3,22	0,1,0	24,19,25	0,0,0	312	149	1	1	1.0,0.589,1.0	1.0,1.0,1.0	-0.137		2458	ENSMUSG00000109378.2	Gm49396	chr7	+	30266173	30266925	30266173	30266361	30266567	30266925	2458	3,3,2	0,0,1	2,2,1	0,0,0	355	149	1	1	1.0,1.0,0.456	1.0,1.0,1.0	-0.181		791	ENSMUSG00000028644.18
1658	ENSMUSG00000044252.19	Osbpl1a	chr18	-	13042914	13043059	13039944	13040006	13044133	13044219	1658	24,8,3	0,1,0	14,10,16	1,0,0	294	149	1	1	1.0,0.802,1.0	0.876,1.0,1.0	-0.025		2460	ENSMUSG00000054708.18	Ankrd24	chr10	+	81475140	81475770	81475140	81475178	81475689	81475770	2460	0,4,3	0,0,0	8,6,0	1,0,0	660	149	1	1	NA,1.0,1.0	0.644,1.0,NA	0.178		793	ENSMUSG00000092060.5
1660	ENSMUSG00000044252.19	Osbpl1a	chr18	-	13071059	13071149	13066644	13066759	13074688	13074846	1660	1,0,0	1,3,7	0,2,0	5,11,9	239	149	1	1	0.384,0.0,0.0	0.0,0.102,0.0	0.094		2466	ENSMUSG00000026197.13	Zfand2b	chr1	+	75147182	75147397	75147182	75147243	75147329	75147397	2466	0,1,3	2,1,9	4,0,0	4,6,4	235	149	0.947314	1	0.0,0.388,0.174	0.388,0.0,0.0	0.058		798	ENSMUSG00000024943.10
1665	ENSMUSG00000024410.16	Rmc1	chr18	+	12302289	12302366	12301773	12301959	12304605	12304690	1665	8,6,9	0,1,0	13,5,10	0,0,0	226	149	1	1	1.0,0.798,1.0	1.0,1.0,1.0	-0.067		2478	ENSMUSG00000026082.12	Rev1	chr1	-	38113395	38114104	38113395	38113524	38113979	38114104	2478	34,28,39	1,1,0	26,38,25	1,0,0	604	149	1	1	0.893,0.874,1.0	0.865,1.0,1.0	-0.033		800	ENSMUSG00000026113.18
1666	ENSMUSG00000024404.8	Riok3	chr18	+	12275992	12276120	12272203	12272517	12281847	12282045	1666	31,37,40	0,0,3	68,49,63	2,0,2	277	149	0.650518	1	1.0,1.0,0.878	0.948,1.0,0.944	-0.005		2483	ENSMUSG00000090626.10	Tex9	chr9	-	72387205	72388057	72387205	72387283	72387878	72388057	2483	15,15,12	0,0,1	32,21,17	0,0,0	744	149	1	1	1.0,1.0,0.706	1.0,1.0,1.0	-0.098		802	ENSMUSG00000029173.13
1667	ENSMUSG00000024404.8	Riok3	chr18	+	12275992	12276251	12272373	12272517	12281847	12281902	1667	19,31,31	0,0,3	48,37,41	2,0,2	408	149	0.54304	1	1.0,1.0,0.791	0.898,1.0,0.882	0.004		2485	ENSMUSG00000012848.16	Rps5	chr7	+	12659663	12660421	12659663	12659792	12660322	12660421	2485	14,25,31	8638051189	25,31,16	121412401443	679	149	1	1	0.004,0.007,0.006	0.004,0.005,0.002	0.002		804	ENSMUSG00000057335.12
1669	ENSMUSG00000040957.16	Cables1	chr18	+	12038981	12039059	12021793	12021886	12056416	12056513	1669	4,2,1	0,0,0	0,0,0	0,1,0	227	149	1	1	1.0,1.0,1.0	NA,0.0,NA	1		2488	ENSMUSG00000006676.17	Usp19	chr9	+	108375094	108375440	108375094	108375235	108375330	108375440	2488	1,0,4	2,1,1	4,0,3	2,1,6	244	149	0.917556	1	0.234,0.0,0.71	0.55,0.0,0.234	0.053		805	ENSMUSG00000057335.12
1672	ENSMUSG00000024283.16	Wac	chr18	+	7901495	7901602	7871530	7871744	7905399	7905492	1672	192133218	0,1,0	173242241	0,0,1	256	149	1	1	1.0,0.987,1.0	1.0,1.0,0.993	-0.002		2489	ENSMUSG00000025995.17	Wdr75	chr1	+	45856422	45857424	45856422	45856603	45857329	45857424	2489	24,13,25	43,45,70	23,25,8	49,45,48	875	149	0.848854	1	0.087,0.047,0.057	0.074,0.086,0.028	0.001		806	ENSMUSG00000057335.12
1673	ENSMUSG00000024283.16	Wac	chr18	+	7905399	7905515	7901495	7901602	7905931	7906044	1673	122,78,127	0,0,2	94130118	0,0,0	265	149	1	1	1.0,1.0,0.973	1.0,1.0,1.0	-0.009		2490	ENSMUSG00000025995.17	Wdr75	chr1	+	45857981	45858818	45857981	45858077	45858648	45858818	2490	8,15,13	56,31,58	9,13,17	45,33,64	720	149	0.717932	1	0.029,0.091,0.044	0.04,0.075,0.052	-0.001		807	ENSMUSG00000057335.12
1674	ENSMUSG00000024283.16	Wac	chr18	+	7910515	7910824	7905931	7906044	7916030	7916291	1674	314254311	0,1,1	315370356	0,0,0	458	149	1	1	1.0,0.988,0.99	1.0,1.0,1.0	-0.007		2494	ENSMUSG00000036820.13	Amdhd2	chr17	-	24376713	24377036	24376713	24376821	24376891	24377036	2494	2,0,2	1,0,3	0,0,0	0,5,7	219	149	1	1	0.576,NA,0.312	NA,0.0,0.0	0.444		808	ENSMUSG00000057335.12
1675	ENSMUSG00000024283.16	Wac	chr18	+	7910515	7910824	7905931	7906044	7916051	7916284	1675	490417568	10,15,24	520637599	9,17,18	458	149	0.214826	1	0.941,0.9,0.885	0.949,0.924,0.915	-0.021		2499	ENSMUSG00000030138.9	Bms1	chr6	-	118390039	118390880	118390039	118390182	118390691	118390880	2499	2,4,5	37,38,35	5,3,3	30,42,68	658	149	0.663109	1	0.012,0.023,0.031	0.036,0.016,0.01	0.001		811	ENSMUSG00000042210.18
1677	ENSMUSG00000073639.7	Rab18	chr18	+	6778476	6778556	6770053	6770109	6783119	6783192	1677	5,12,16	0,0,0	14,15,8	0,2,0	229	149	1	1	1.0,1.0,1.0	1.0,0.83,1.0	0.057		2501	ENSMUSG00000007591.16	Tssk4	chr14	+	55888915	55889996	55888915	55889309	55889575	55889996	2501	2,0,5	0,2,0	0,0,6	0,0,0	415	149	1	1	1.0,0.0,1.0	NA,NA,1.0	-0.333		812	ENSMUSG00000028759.14
1678	ENSMUSG00000073639.7	Rab18	chr18	+	6778494	6778556	6770053	6770109	6783119	6783152	1678	22,26,40	0,0,0	45,42,44	0,2,0	211	149	1	1	1.0,1.0,1.0	1.0,0.937,1.0	0.021		2502	ENSMUSG00000007591.16	Tssk4	chr14	+	55888915	55889996	55888915	55889309	55889722	55889996	2502	5,2,6	0,0,0	0,0,6	0,0,2	562	149	1	1	1.0,1.0,1.0	NA,NA,0.443	0.557		815	ENSMUSG00000049658.14
1680	ENSMUSG00000006740.15	Kif5b	chr18	-	6226381	6226430	6225767	6225823	6226863	6226968	1680	71,50,92	0,1,0	46,65,83	0,0,0	198	149	1	1	1.0,0.974,1.0	1.0,1.0,1.0	-0.009		2504	ENSMUSG00000054435.17	Gimap4	chr6	+	48667304	48667882	48667304	48667391	48667775	48667882	2504	4,6,7	0,0,0	7,15,6	0,1,0	533	149	1	1	1.0,1.0,1.0	1.0,0.807,1.0	0.064		817	ENSMUSG00000067367.10
1683	ENSMUSG00000024238.16	Zeb1	chr18	+	5633203	5633357	5591859	5591967	5705042	5706884	1683	0,0,0	11,15,14	2,3,1	36,9,21	303	149	0.245071	1	0.0,0.0,0.0	0.027,0.141,0.023	-0.064		2513	ENSMUSG00000026554.16	Dcaf8	chr1	+	172013862	172015027	172013862	172013935	172014919	172015027	2513	24,23,31	0,1,0	41,34,38	0,1,0	1133	149	1	1	1.0,0.752,1.0	1.0,0.817,1.0	-0.022		818	ENSMUSG00000045482.17
1684	ENSMUSG00000024238.16	Zeb1	chr18	+	5641381	5641518	5591911	5591967	5705042	5705232	1684	0,1,0	11,15,14	0,0,0	36,9,21	286	149	1	1	0.0,0.034,0.0	0.0,0.0,0.0	0.011		2516	ENSMUSG00000038271.18	Iffo1	chr6	+	125130004	125130465	125130004	125130125	125130369	125130465	2516	7,1,0	5,11,1	3,4,0	7,2,3	393	149	0.808362	1	0.347,0.033,0.0	0.14,0.431,0.0	-0.064		819	ENSMUSG00000029122.12
1686	ENSMUSG00000024238.16	Zeb1	chr18	+	5748693	5748855	5705042	5705243	5758964	5759057	1686	29,16,34	0,0,0	66,36,33	0,0,1	311	149	1	1	1.0,1.0,1.0	1.0,1.0,0.941	0.02		2518	ENSMUSG00000027710.15	Acad9	chr3	+	36128498	36129492	36128498	36128605	36129391	36129492	2518	11,8,17	29,18,23	12,8,12	17,26,15	935	149	0.869549	1	0.057,0.066,0.105	0.101,0.047,0.113	-0.011		825	ENSMUSG00000030505.18
1688	ENSMUSG00000024236.19	Svil	chr18	+	4971089	4971197	4920566	4920874	5037107	5037165	1688	6,1,1	6,1,1	5,7,5	1,16,0	257	149	0.195773	1	0.367,0.367,0.367	0.744,0.202,1.0	-0.282		2525	ENSMUSG00000042185.15	Nfrkb	chr9	+	31313530	31314370	31313530	31313574	31314309	31314370	2525	3,16,6	2,1,4	3,11,23	1,7,5	884	149	0.964371	1	0.202,0.729,0.202	0.336,0.209,0.437	0.05		837	ENSMUSG00000029687.17
1689	ENSMUSG00000024236.19	Svil	chr18	+	5040147	5040239	5037107	5037165	5046588	5046646	1689	19,8,12	0,0,1	11,22,19	1,1,0	241	149	1	1	1.0,1.0,0.881	0.872,0.932,1.0	0.026		2532	ENSMUSG00000020256.15	Aldh1l2	chr10	-	83339805	83340060	83339805	83339911	83339989	83340060	2532	0,2,0	0,1,0	2,0,1	6,1,0	227	149	1	1	NA,0.568,NA	0.18,0.0,1.0	0.175		842	ENSMUSG00000075703.17
1691	ENSMUSG00000024236.19	Svil	chr18	+	5054017	5054098	5048884	5049494	5058124	5058159	1691	0,0,0	5,5,6	0,2,0	10,7,1	230	149	1	1	0.0,0.0,0.0	0.0,0.156,0.0	-0.052		2538	ENSMUSG00000055024.13	Ep300	chr15	+	81523941	81524342	81523941	81524092	81524195	81524342	2538	2,4,6	27,25,36	10,1,0	32,33,39	252	149	0.632625	1	0.042,0.086,0.09	0.156,0.018,0.0	0.015		844	ENSMUSG00000046808.18
1692	ENSMUSG00000024236.19	Svil	chr18	+	5055979	5056849	5048884	5049494	5057274	5057439	1692	8,3,6	1,0,0	2,11,2	0,0,0	1019	149	1	1	0.539,1.0,1.0	1.0,1.0,1.0	-0.154		2542	ENSMUSG00000051306.8	Usp42	chr5	-	143700356	143702426	143700356	143701835	143702331	143702426	2542	9,7,10	25,16,19	8,6,8	14,17,24	645	149	0.787168	1	0.077,0.092,0.108	0.117,0.075,0.071	0.005		845	ENSMUSG00000004626.15
1693	ENSMUSG00000024236.19	Svil	chr18	+	5055979	5056849	5048884	5049494	5058124	5058159	1693	8,3,6	5,5,6	2,11,2	10,7,1	1019	149	0.606768	1	0.19,0.081,0.128	0.028,0.187,0.226	-0.014		2548	ENSMUSG00000078350.12	Smim1	chr4	-	154108523	154110078	154108523	154108807	154109960	154110078	2548	0,7,5	0,0,2	3,3,2	0,0,0	1302	149	1	1	NA,1.0,0.222	1.0,1.0,1.0	-0.389		846	ENSMUSG00000004626.15
1694	ENSMUSG00000024236.19	Svil	chr18	+	5055979	5056849	5054017	5054098	5058124	5058159	1694	8,3,6	0,0,0	2,11,2	0,1,0	1019	149	1	1	1.0,1.0,1.0	1.0,0.617,1.0	0.128		2549	ENSMUSG00000002055.10	Spag5	chr11	+	78204338	78204765	78204338	78204473	78204645	78204765	2549	0,4,1	27,28,31	4,0,2	28,44,38	321	149	0.872248	1	0.0,0.062,0.015	0.062,0.0,0.024	-0.003		849	ENSMUSG00000057541.15
1695	ENSMUSG00000024236.19	Svil	chr18	+	5057274	5057439	5048884	5049494	5058124	5058159	1695	1,0,0	5,5,6	0,0,0	10,7,1	314	149	1	1	0.087,0.0,0.0	0.0,0.0,0.0	0.029		2551	ENSMUSG00000024792.10	Zfpl1	chr19	-	6132210	6132501	6132210	6132357	6132428	6132501	2551	3,1,2	10,15,10	2,2,4	20,8,29	220	149	0.8798	1	0.169,0.043,0.119	0.063,0.145,0.085	0.013		850	ENSMUSG00000041415.12
1697	ENSMUSG00000024236.19	Svil	chr18	+	5060514	5060610	5059229	5059369	5062161	5062405	1697	0,2,0	18,12,15	0,0,1	20,27,43	245	149	1	1	0.0,0.092,0.0	0.0,0.0,0.014	0.026		2554	ENSMUSG00000056962.12	Jmjd6	chr11	-	116730663	116731371	116730663	116730752	116731273	116731371	2554	19,18,14	0,0,0	19,29,27	1,1,0	670	149	1	1	1.0,1.0,1.0	0.809,0.866,1.0	0.108		857	ENSMUSG00000005069.13
1698	ENSMUSG00000024236.19	Svil	chr18	+	5073880	5074004	5064470	5064690	5082782	5082930	1698	20,18,17	0,0,2	13,15,13	0,1,0	273	149	1	1	1.0,1.0,0.823	1.0,0.891,1.0	-0.023		2555	ENSMUSG00000056962.12	Jmjd6	chr11	-	116730663	116731371	116730663	116730757	116731273	116731371	2555	19,18,14	0,0,0	19,29,27	0,0,2	665	149	1	1	1.0,1.0,1.0	1.0,1.0,0.752	0.083		858	ENSMUSG00000003161.16
1699	ENSMUSG00000024236.19	Svil	chr18	+	5086534	5086624	5082782	5082930	5086709	5086796	1699	25,27,19	1,0,0	17,33,10	0,0,0	239	149	1	1	0.94,1.0,1.0	1.0,1.0,1.0	-0.02		2564	ENSMUSG00000031897.10	Psmb10	chr8	-	106663872	106664223	106663872	106664013	106664125	106664223	2564	0,0,2	0,3,4	0,0,0	1,1,0	261	149	1	1	NA,0.0,0.222	0.0,0.0,NA	0.111		859	ENSMUSG00000003378.10
1700	ENSMUSG00000024234.8	Mtpap	chr18	+	4379568	4379741	4375591	4375778	4380653	4380887	1700	36,43,63	0,0,0	80,51,48	0,1,0	322	149	1	1	1.0,1.0,1.0	1.0,0.959,1.0	0.014		2570	ENSMUSG00000015536.15	Mocs2	chr13	+	114961746	114962817	114961746	114961897	114962740	114962817	2570	5,5,6	0,0,0	4,12,5	0,0,1	992	149	1	1	1.0,1.0,1.0	1.0,1.0,0.429	0.19		861	ENSMUSG00000035086.14
1701	ENSMUSG00000024234.8	Mtpap	chr18	+	4380653	4380887	4379568	4379741	4383188	4383413	1701	32,28,46	0,0,0	52,40,48	0,0,1	383	149	1	1	1.0,1.0,1.0	1.0,1.0,0.949	0.017		2572	ENSMUSG00000025138.15	Sirt7	chr11	-	120511249	120511709	120511249	120511330	120511472	120511709	2572	0,0,1	6,0,12	3,3,1	7,1,6	291	149	1	1	0.0,NA,0.041	0.18,0.606,0.079	-0.268		863	ENSMUSG00000036078.17
1702	ENSMUSG00000024234.8	Mtpap	chr18	+	4380672	4380887	4379568	4379741	4383188	4383413	1702	20,11,15	0,0,0	34,22,19	0,0,1	364	149	1	1	1.0,1.0,1.0	1.0,1.0,0.886	0.038		2575	ENSMUSG00000050711.8	Scg2	chr1	-	79412385	79414735	79412385	79413648	79413768	79414735	2575	0,1,1	0,0,0	0,0,0	2,0,0	269	149	1	1	NA,1.0,1.0	0.0,NA,NA	1		865	ENSMUSG00000038506.14
1707	ENSMUSG00000024231.16	Cul2	chr18	+	3433993	3434110	3431483	3431585	3434843	3435385	1707	51,38,82	0,0,0	62,81,93	1,0,0	266	149	1	1	1.0,1.0,1.0	0.972,1.0,1.0	0.009		2577	ENSMUSG00000031387.15	Renbp	chrX	-	72972721	72974123	72972721	72973868	72974013	72974123	2577	0,1,2	3,2,4	0,0,0	11,2,12	294	149	0.833415	1	0.0,0.202,0.202	0.0,0.0,0.0	0.135		867	ENSMUSG00000022425.17
1711	ENSMUSG00000063889.17	Crem	chr18	-	3276693	3276729	3273421	3273578	3295039	3295182	1711	0,0,0	1,0,1	2,1,0	0,3,0	185	149	1	1	0.0,NA,0.0	1.0,0.212,NA	-0.606		2581	ENSMUSG00000002329.8	Mdp1	chr14	-	55897444	55897685	55897444	55897555	55897624	55897685	2581	7,12,13	10,17,7	16,7,11	7,15,18	218	149	0.831551	1	0.324,0.325,0.559	0.61,0.242,0.295	0.02		871	ENSMUSG00000029033.17
1714	ENSMUSG00000063889.17	Crem	chr18	-	3287903	3288092	3273421	3273578	3295039	3295182	1714	3,0,0	1,0,1	0,0,2	0,3,0	338	149	1	1	0.569,NA,0.0	NA,0.0,1.0	-0.216		2587	ENSMUSG00000006058.11	Snf8	chr11	+	95937105	95938256	95937105	95937180	95938020	95938256	2587	7,11,13	12,9,14	12,22,9	8,18,34	989	149	0.749214	1	0.081,0.156,0.123	0.184,0.156,0.038	-0.006		872	ENSMUSG00000060073.10
1715	ENSMUSG00000063889.17	Crem	chr18	-	3287903	3288092	3276693	3276729	3295039	3295182	1715	3,0,0	0,0,0	4,0,1	2,1,0	338	149	1	1	1.0,NA,NA	0.469,0.0,1.0	0.51		2590	ENSMUSG00000004891.17	Nes	chr3	+	87882727	87887758	87882727	87883887	87884019	87887758	2590	66,42,41	7,0,3	43,50,38	2,8,1	281	149	0.646139	1	0.833,1.0,0.879	0.919,0.768,0.953	0.024		874	ENSMUSG00000043410.17
1718	ENSMUSG00000063889.17	Crem	chr18	-	3299161	3299308	3295321	3295416	3325360	3325474	1718	2,0,0	0,2,0	2,2,0	0,0,0	296	149	1	1	1.0,0.0,NA	1.0,1.0,NA	-0.5		2591	ENSMUSG00000096935.6	1700113A16Rik	chr3	-	88078862	88079565	88078862	88079276	88079394	88079565	2591	16,3,13	0,1,0	12,12,8	1,1,0	267	149	1	1	1.0,0.626,1.0	0.87,0.87,1.0	-0.038		875	ENSMUSG00000001082.13
1720	ENSMUSG00000063889.17	Crem	chr18	-	3327493	3327591	3325360	3325478	3337379	3337488	1720	1,0,0	2,0,1	2,0,1	0,0,3	247	149	1	1	0.232,NA,0.0	1.0,NA,0.167	-0.468		2593	ENSMUSG00000066150.13	Slc31a1	chr4	+	62306103	62310006	62306103	62306272	62306834	62310006	2593	5,7,6	27,26,38	7,5,5	28,30,20	711	149	0.845423	1	0.037,0.053,0.032	0.05,0.034,0.05	-0.004		882	ENSMUSG00000019948.5
1721	ENSMUSG00000003559.9	As3mt	chr19	+	46697406	46697557	46696356	46696636	46697985	46698100	1721	9,6,2	2,0,0	7,6,8	0,0,0	300	149	1	1	0.691,1.0,1.0	1.0,1.0,1.0	-0.103		2594	ENSMUSG00000028041.18	Adam15	chr3	-	89250694	89251284	89250694	89250890	89250979	89251284	2594	4,1,1	4,7,2	2,3,4	7,12,13	238	149	0.727585	1	0.385,0.082,0.238	0.152,0.135,0.162	0.085		883	ENSMUSG00000029020.14
1724	ENSMUSG00000003559.9	As3mt	chr19	+	46713342	46713477	46708752	46708895	46728899	46729477	1724	28,17,20	0,1,0	27,34,35	0,0,0	284	149	1	1	1.0,0.899,1.0	1.0,1.0,1.0	-0.034		2596	ENSMUSG00000019734.17	Tmc4	chr7	-	3668789	3669179	3668789	3669007	3669100	3669179	2596	0,0,6	0,0,0	2,0,1	0,5,0	242	149	1	1	NA,NA,1.0	1.0,0.0,1.0	0.333		885	ENSMUSG00000031558.16
1734	ENSMUSG00000034709.9	Ppp1r21	chr17	+	88852748	88852895	88850272	88850341	88854995	88855097	1734	24,13,19	0,2,0	19,16,15	0,0,0	296	149	1	1	1.0,0.766,1.0	1.0,1.0,1.0	-0.078		2598	ENSMUSG00000019734.17	Tmc4	chr7	-	3674272	3675109	3674272	3674440	3674961	3675109	2598	0,1,2	1,0,0	0,0,2	1,0,4	670	149	1	1	0.0,1.0,1.0	0.0,NA,0.1	0.617		886	ENSMUSG00000005936.20
1735	ENSMUSG00000034709.9	Ppp1r21	chr17	+	88857218	88857277	88856921	88857086	88858089	88858184	1735	18,10,26	0,1,0	26,24,17	0,0,0	208	149	1	1	1.0,0.878,1.0	1.0,1.0,1.0	-0.041		2600	ENSMUSG00000027944.14	Hax1	chr3	-	89904693	89905310	89904693	89904872	89905044	89905310	2600	19,10,12	4,3,8	27,15,27	8,2,11	321	149	0.656053	1	0.688,0.607,0.41	0.61,0.777,0.533	-0.072		887	ENSMUSG00000013155.11
1736	ENSMUSG00000034709.9	Ppp1r21	chr17	+	88889842	88889941	88887862	88887979	88891280	88891409	1736	22,11,17	0,1,1	20,21,27	0,0,0	248	149	1	1	1.0,0.869,0.911	1.0,1.0,1.0	-0.073		2601	ENSMUSG00000027944.14	Hax1	chr3	-	89904693	89905310	89904693	89904881	89905044	89905310	2601	15,6,10	72,59,88	19,9,18	133,99,145	312	149	0.682918	1	0.09,0.046,0.051	0.064,0.042,0.056	0.008		888	ENSMUSG00000024220.15
1740	ENSMUSG00000036438.15	Calm2	chr17	-	87750123	87750154	87743031	87743362	87754220	87754276	1740	69,54,73	0,1,0	46,38,79	0,0,3	180	149	1	1	1.0,0.978,1.0	1.0,1.0,0.956	0.007		2605	ENSMUSG00000027933.12	Ints3	chr3	-	90299834	90300198	90299834	90299907	90300097	90300198	2605	6,2,14	24,19,32	10,3,2	15,22,24	339	149	0.614773	1	0.099,0.044,0.161	0.227,0.057,0.035	-0.005		895	ENSMUSG00000060636.15
1744	ENSMUSG00000037104.10	Socs5	chr17	+	87428175	87428236	87415106	87415475	87441049	87445267	1744	0,0,3	7,16,9	0,0,0	8,18,16	210	149	0.728207	1	0.0,0.0,0.191	0.0,0.0,0.0	0.064		2606	ENSMUSG00000044533.16	Rps2	chr17	+	24939246	24939705	24939246	24939426	24939507	24939705	2606	16,16,12	233920833546	23,13,23	314430544103	230	149	1	1	0.004,0.005,0.002	0.005,0.003,0.004	0		898	ENSMUSG00000024287.9
1745	ENSMUSG00000024146.10	Cript	chr17	+	87335126	87335192	87332977	87333103	87338435	87338490	1745	20,26,47	0,0,0	18,28,40	0,0,2	215	149	1	1	1.0,1.0,1.0	1.0,1.0,0.933	0.022		2607	ENSMUSG00000030037.10	Mrpl53	chr6	+	83086294	83086920	83086294	83086407	83086502	83086920	2607	6,2,13	58,53,97	8,5,5	49,80,57	244	149	0.786889	1	0.059,0.023,0.076	0.091,0.037,0.051	-0.007		902	ENSMUSG00000020741.18
1748	ENSMUSG00000024135.11	Srbd1	chr17	-	86307748	86307901	86295752	86295937	86308858	86309035	1748	56,56,48	0,0,0	65,69,51	0,0,2	302	149	1	1	1.0,1.0,1.0	1.0,1.0,0.926	0.025		2609	ENSMUSG00000047986.13	Palm3	chr8	+	84753628	84754800	84753628	84753713	84754754	84754800	2609	3,1,1	2,0,0	5,8,6	1,4,2	1190	149	0.830651	1	0.158,1.0,1.0	0.385,0.2,0.273	0.433		904	ENSMUSG00000040606.15
1750	ENSMUSG00000024135.11	Srbd1	chr17	-	86308858	86309035	86295752	86295937	86358513	86358596	1750	0,1,0	0,0,0	1,1,2	2,0,0	326	149	1	1	NA,1.0,NA	0.186,1.0,1.0	0.271		2613	ENSMUSG00000021259.6	Cyp46a1	chr12	+	108311832	108312434	108311832	108311906	108312347	108312434	2613	17,3,5	0,2,0	5,6,0	0,0,0	590	149	1	1	1.0,0.275,1.0	1.0,1.0,NA	-0.242		908	ENSMUSG00000075590.5
1752	ENSMUSG00000024135.11	Srbd1	chr17	-	86311274	86311381	86308858	86309035	86358513	86358596	1752	13,12,12	0,0,0	29,16,28	1,0,0	256	149	1	1	1.0,1.0,1.0	0.944,1.0,1.0	0.019		2621	ENSMUSG00000041859.11	Mcm3	chr1	-	20875486	20876124	20875486	20875563	20876020	20876124	2621	12,15,16	90,98,167	11,24,9	86,86,149	606	149	0.62247	1	0.032,0.036,0.023	0.03,0.064,0.015	-0.006		910	ENSMUSG00000054405.15
1753	ENSMUSG00000024135.11	Srbd1	chr17	-	86410270	86410428	86406632	86406723	86416654	86416762	1753	36,33,46	0,0,0	54,41,67	0,5,0	307	149	0.208674	1	1.0,1.0,1.0	1.0,0.799,1.0	0.067		2622	ENSMUSG00000038619.13	Ensa	chr3	+	95535851	95539413	95535851	95536018	95538742	95539413	2622	327328350	0,1,0	354356369	0,1,0	2873	149	1	1	1.0,0.944,1.0	1.0,0.949,1.0	-0.002		912	ENSMUSG00000025188.16
1754	ENSMUSG00000024135.11	Srbd1	chr17	-	86416654	86416762	86410270	86410428	86422620	86422724	1754	30,18,28	0,3,0	34,25,49	0,3,2	257	149	0.300898	1	1.0,0.777,1.0	1.0,0.829,0.934	0.005		2626	ENSMUSG00000045934.16	Mtmr11	chr3	+	96072102	96072402	96072102	96072190	96072313	96072402	2626	0,1,1	1,1,3	1,1,0	1,0,2	272	149	1	1	0.0,0.354,0.154	0.354,1.0,0.0	-0.282		916	ENSMUSG00000040690.16
1755	ENSMUSG00000093460.10	Six3os1	chr17	-	85922075	85922120	85915354	85920418	85923021	85923171	1755	8,4,20	0,0,0	17,7,21	0,0,1	194	149	1	1	1.0,1.0,1.0	1.0,1.0,0.942	0.019		2629	ENSMUSG00000060397.7	Zfp128	chr7	+	12618569	12619045	12618569	12618696	12618949	12619045	2629	0,0,2	4,4,1	0,1,0	7,5,3	402	149	1	1	0.0,0.0,0.426	0.0,0.069,0.0	0.119		917	ENSMUSG00000028797.21
1756	ENSMUSG00000093460.10	Six3os1	chr17	-	85922075	85922120	85920628	85921334	85923021	85923171	1756	12,10,31	3,0,0	20,15,22	0,0,0	194	149	0.703945	1	0.754,1.0,1.0	1.0,1.0,1.0	-0.082		2634	ENSMUSG00000017664.17	Slc35c2	chr2	-	165125168	165125520	165125168	165125327	165125447	165125520	2634	6,4,13	0,0,1	14,11,16	0,0,0	269	149	1	1	1.0,1.0,0.878	1.0,1.0,1.0	-0.041		920	ENSMUSG00000028797.21
1758	ENSMUSG00000093460.10	Six3os1	chr17	-	85922075	85922155	85920300	85920418	85923021	85923171	1758	5,0,2	0,0,0	3,4,4	0,0,1	229	149	1	1	1.0,NA,1.0	1.0,1.0,0.722	0.093		2638	ENSMUSG00000032299.11	Commd4	chr9	-	57063455	57063839	57063455	57063575	57063799	57063839	2638	7,2,1	10,8,16	3,4,8	21,18,14	373	149	0.857333	1	0.219,0.091,0.024	0.054,0.082,0.186	0.004		921	ENSMUSG00000028797.21
1759	ENSMUSG00000093460.10	Six3os1	chr17	-	85923021	85925062	85914787	85915326	85925484	85925793	1759	89,54,82	0,0,0	198158127	0,2,0	2190	149	1	1	1.0,1.0,1.0	1.0,0.843,1.0	0.052		2641	ENSMUSG00000029510.16	Gpc2	chr5	-	138274190	138275749	138274190	138274600	138274845	138275749	2641	3,4,2	19,14,11	3,2,0	4,7,7	394	149	0.805621	1	0.056,0.098,0.064	0.221,0.098,0.0	-0.034		922	ENSMUSG00000028797.21
1761	ENSMUSG00000093460.10	Six3os1	chr17	-	85924709	85925062	85923021	85923262	85925484	85925501	1761	20,14,7	1,2,1	44,27,27	0,3,0	502	149	0.131626	1	0.856,0.675,0.675	1.0,0.728,1.0	-0.174		2644	ENSMUSG00000028600.16	Podn	chr4	-	107879677	107880609	107879677	107879834	107880499	107880609	2644	0,0,1	0,0,3	3,3,1	2,0,1	814	149	1	1	NA,NA,0.058	0.215,1.0,0.155	-0.399		923	ENSMUSG00000028796.18
1762	ENSMUSG00000024127.16	Prepl	chr17	-	85395767	85395870	85390620	85390743	85397533	85397669	1762	3,1,2	6,1,4	4,2,6	5,0,4	252	149	0.107031	1	0.228,0.372,0.228	0.321,1.0,0.47	-0.321		2645	ENSMUSG00000032359.15	Ctsh	chr9	+	89949079	89950526	89949079	89949161	89950457	89950526	2645	2,0,0	2,0,0	0,1,0	0,0,0	1445	149	1	1	0.093,NA,NA	NA,1.0,NA	-0.907		924	ENSMUSG00000042408.14
1763	ENSMUSG00000024127.16	Prepl	chr17	-	85395767	85396303	85390620	85390743	85397533	85397652	1763	42,24,50	6,1,4	45,47,64	5,0,4	685	149	0.307668	1	0.604,0.839,0.731	0.662,1.0,0.777	-0.088		2646	ENSMUSG00000007379.16	Dennd2c	chr3	+	103040530	103041167	103040530	103040661	103041054	103041167	2646	1,0,0	1,0,2	0,0,0	1,0,0	542	149	1	1	0.216,NA,0.0	0.0,NA,NA	0.108		926	ENSMUSG00000002797.10
1766	ENSMUSG00000055817.19	Mta3	chr17	+	84061282	84061346	84045757	84045884	84062987	84063105	1766	25,29,37	0,0,0	43,35,35	0,3,0	213	149	0.865957	1	1.0,1.0,1.0	1.0,0.891,1.0	0.036		2651	ENSMUSG00000026200.14	Glb1l	chr1	-	75185330	75185866	75185330	75185481	75185699	75185866	2651	4,1,1	2,2,0	2,3,1	1,1,2	367	149	0.879838	1	0.448,0.169,1.0	0.448,0.549,0.169	0.15		927	ENSMUSG00000042489.16
1769	ENSMUSG00000024248.15	Cox7a2l	chr17	-	83811528	83811657	83809346	83810166	83821632	83821759	1769	254200355	0,1,2	281346408	0,0,0	278	149	1	1	1.0,0.991,0.99	1.0,1.0,1.0	-0.006		2653	ENSMUSG00000016346.18	Kcnq2	chr2	-	180750236	180750910	180750236	180750354	180750814	180750910	2653	0,1,1	1,0,0	1,2,0	0,0,0	609	149	1	1	0.0,1.0,1.0	1.0,1.0,NA	-0.333		928	ENSMUSG00000042489.16
1774	ENSMUSG00000054640.16	Slc8a1	chr17	-	81740072	81740203	81735610	81735710	81749201	81749219	1774	5,1,3	0,0,0	0,1,3	1,0,0	280	149	1	1	1.0,1.0,1.0	0.0,1.0,1.0	0.333		2654	ENSMUSG00000016346.18	Kcnq2	chr2	-	180750236	180751578	180750236	180750910	180751467	180751578	2654	0,1,1	2,2,0	4,0,0	0,0,0	706	149	1	1	0.0,0.095,1.0	1.0,NA,NA	-0.635		930	ENSMUSG00000035234.19
1782	ENSMUSG00000024242.16	Map4k3	chr17	-	80925722	80925776	80923914	80923957	80925985	80926024	1782	37,27,31	2,4,0	31,32,28	3,0,0	203	149	0.120515	1	0.931,0.832,1.0	0.884,1.0,1.0	-0.04		2656	ENSMUSG00000000561.15	Wdr77	chr3	+	105873080	105873741	105873080	105873172	105873672	105873741	2656	22,15,21	0,1,2	34,37,30	1,0,0	649	149	0.806868	1	1.0,0.775,0.707	0.886,1.0,1.0	-0.135		932	ENSMUSG00000049659.16
1783	ENSMUSG00000024242.16	Map4k3	chr17	-	80936714	80936777	80931484	80931543	80937843	80937902	1783	12,7,13	12,5,14	19,5,10	10,11,10	212	149	0.904449	1	0.413,0.496,0.395	0.572,0.242,0.413	0.026		2659	ENSMUSG00000026170.7	Cyp27a1	chr1	+	74774712	74775195	74774712	74774910	74775022	74775195	2659	6,4,0	0,0,0	7,4,6	0,1,0	261	149	1	1	1.0,1.0,NA	1.0,0.695,1.0	0.102		933	ENSMUSG00000004032.11
1784	ENSMUSG00000024242.16	Map4k3	chr17	-	80937843	80937902	80931484	80931543	80944148	80944227	1784	19,15,20	1,0,0	18,21,17	0,0,0	208	149	1	1	0.932,1.0,1.0	1.0,1.0,1.0	-0.023		2665	ENSMUSG00000039244.11	E130309D02Rik	chr5	-	143297465	143300154	143297465	143297631	143299932	143300154	2665	39,27,40	10,7,18	33,45,33	13,11,18	2450	149	0.646462	1	0.192,0.19,0.119	0.134,0.199,0.1	0.023		935	ENSMUSG00000041245.14
1785	ENSMUSG00000024242.16	Map4k3	chr17	-	80944148	80944227	80931484	80931543	80951560	80951671	1785	15,10,13	0,1,0	7,15,12	0,0,1	228	149	1	1	1.0,0.867,1.0	1.0,1.0,0.887	-0.007		2666	ENSMUSG00000059326.8	Csf2ra	chr19	-	61214365	61214822	61214365	61214493	61214652	61214822	2666	1,7,0	0,0,1	2,8,2	1,0,0	308	149	1	1	1.0,1.0,0.0	0.492,1.0,1.0	-0.164		936	ENSMUSG00000029993.17
1786	ENSMUSG00000024242.16	Map4k3	chr17	-	80952142	80952274	80951920	80951983	80956955	80957028	1786	33,38,54	0,0,0	25,31,57	0,1,0	281	149	1	1	1.0,1.0,1.0	1.0,0.943,1.0	0.019		2667	ENSMUSG00000039157.13	Fam102a	chr2	+	32448329	32450167	32448329	32448359	32450050	32450167	2667	17,26,23	3,4,9	41,32,13	2,11,6	1840	149	0.860663	1	0.315,0.345,0.171	0.624,0.191,0.149	-0.044		938	ENSMUSG00000029152.14
1787	ENSMUSG00000024242.16	Map4k3	chr17	-	80971420	80971511	80963285	80963350	80988296	80988354	1787	30,26,33	2,1,2	30,37,45	6,4,2	240	149	0.138343	1	0.903,0.942,0.911	0.756,0.852,0.933	0.072		2671	ENSMUSG00000073702.12	Rpl31	chr1	+	39410034	39410447	39410034	39410147	39410382	39410447	2671	13,19,14	641509924	21,11,15	763844961	384	149	0.911731	1	0.008,0.014,0.006	0.011,0.005,0.006	0.002		939	ENSMUSG00000000392.18
1788	ENSMUSG00000024241.8	Sos1	chr17	-	80727691	80727914	80726437	80726557	80730110	80730214	1788	87,78,126	0,0,0	71,59,109	0,0,5	372	149	0.34032	1	1.0,1.0,1.0	1.0,1.0,0.897	0.034		2673	ENSMUSG00000053819.17	Camk2d	chr3	+	126564433	126565495	126564433	126564506	126565422	126565495	2673	3,1,2	0,1,0	12,2,4	0,0,0	1065	149	1	1	1.0,0.123,1.0	1.0,1.0,1.0	-0.292		941	ENSMUSG00000006392.17
1789	ENSMUSG00000024241.8	Sos1	chr17	-	80753030	80753141	80752858	80752957	80756686	80756830	1789	35,30,61	1,0,1	43,41,38	0,1,0	260	149	1	1	0.953,1.0,0.972	1.0,0.959,1.0	-0.011		2680	ENSMUSG00000115987.2	Vps28	chr15	-	76506670	76506908	76506670	76506762	76506854	76506908	2680	0,0,1	9,7,10	0,0,0	6,20,17	241	149	1	1	0.0,0.0,0.058	0.0,0.0,0.0	0.019		944	ENSMUSG00000028542.18
1790	ENSMUSG00000045257.11	Morn2	chr17	+	80602941	80603078	80601898	80602005	80604682	80604902	1790	10,13,16	0,0,0	6,9,5	0,1,0	286	149	1	1	1.0,1.0,1.0	1.0,0.824,1.0	0.059		2681	ENSMUSG00000115987.2	Vps28	chr15	-	76507370	76507694	76507370	76507472	76507588	76507694	2681	1,0,0	24,15,14	0,2,0	26,22,19	265	149	1	1	0.023,0.0,0.0	0.0,0.049,0.0	-0.009		945	ENSMUSG00000028542.18
1793	ENSMUSG00000031342.18	Gpm6b	chrX	+	165136560	165136680	165127687	165128077	165155633	165155820	1793	2,0,0	0,2,0	5,0,1	0,0,0	269	149	1	1	1.0,0.0,NA	1.0,NA,1.0	-0.5		2682	ENSMUSG00000115987.2	Vps28	chr15	-	76507370	76508375	76507370	76507694	76508285	76508375	2682	14,4,5	25,22,18	4,3,12	15,17,26	740	149	0.783937	1	0.101,0.035,0.053	0.051,0.034,0.085	0.006		947	ENSMUSG00000029017.14
1799	ENSMUSG00000059811.14	Atl2	chr17	-	80183230	80183475	80172470	80172605	80203337	80203552	1799	76,66,95	0,0,0	99110144	0,1,1	394	149	1	1	1.0,1.0,1.0	1.0,0.977,0.982	0.014		2683	ENSMUSG00000036560.15	Lgi4	chr7	+	30762528	30762781	30762528	30762600	30762709	30762781	2683	0,0,0	0,0,1	1,1,0	1,1,0	258	149	1	1	NA,NA,0.0	0.366,0.366,NA	-0.366		948	ENSMUSG00000097451.12
1800	ENSMUSG00000036368.9	Rmdn2	chr17	+	79934890	79935808	79929198	79929201	79957730	79957734	1800	1,2,0	1,1,0	1,2,6	0,0,2	1067	149	1	1	0.123,0.218,NA	1.0,1.0,0.295	-0.595		2685	ENSMUSG00000006575.15	Rundc3a	chr11	+	102290020	102290289	102290020	102290110	102290208	102290289	2685	2,0,0	1,4,0	2,1,0	1,0,5	247	149	1	1	0.547,0.0,NA	0.547,1.0,0.0	-0.242		951	ENSMUSG00000097451.12
1801	ENSMUSG00000024084.9	Qpct	chr17	+	79371356	79371503	79359334	79359817	79378101	79378380	1801	0,2,2	0,0,0	10,2,3	0,0,2	296	149	1	1	NA,1.0,1.0	1.0,1.0,0.43	0.19		2687	ENSMUSG00000026565.19	Pou2f1	chr1	-	165703025	165703617	165703025	165703085	165703471	165703617	2687	54,34,80	0,2,0	60,80,87	0,0,0	535	149	1	1	1.0,0.826,1.0	1.0,1.0,1.0	-0.058		952	ENSMUSG00000097451.12
1802	ENSMUSG00000024070.16	Prkd3	chr17	-	79269955	79270005	79268539	79268612	79273603	79273880	1802	5,2,6	0,1,0	3,6,8	0,0,0	199	149	1	1	1.0,0.6,1.0	1.0,1.0,1.0	-0.133		2689	ENSMUSG00000029359.14	Tesc	chr5	+	118194441	118194709	118194441	118194503	118194601	118194709	2689	1,0,4	0,0,0	0,0,0	0,0,2	247	149	1	1	1.0,NA,1.0	NA,NA,0.0	1		953	ENSMUSG00000097451.12
1803	ENSMUSG00000024070.16	Prkd3	chr17	-	79269955	79270008	79268539	79268612	79273603	79273880	1803	48,49,59	0,1,0	46,27,68	0,0,0	202	149	1	1	1.0,0.973,1.0	1.0,1.0,1.0	-0.009		2691	ENSMUSG00000019312.11	Grb7	chr11	+	98342420	98342745	98342420	98342542	98342667	98342745	2691	0,0,0	6,2,3	3,0,0	13,6,6	274	149	0.737546	1	0.0,0.0,0.0	0.111,0.0,0.0	-0.037		954	ENSMUSG00000097451.12
1804	ENSMUSG00000024082.6	Ndufaf7	chr17	+	79249497	79249711	79247023	79247134	79250681	79250740	1804	25,26,28	0,0,1	35,29,37	0,2,1	363	149	0.719879	1	1.0,1.0,0.92	1.0,0.856,0.938	0.042		2692	ENSMUSG00000019312.11	Grb7	chr11	+	98344006	98344419	98344006	98344117	98344320	98344419	2692	0,0,0	1,3,5	0,1,1	5,6,1	352	149	1	1	0.0,0.0,0.0	0.0,0.066,0.297	-0.121		955	ENSMUSG00000097451.12
1806	ENSMUSG00000024077.16	Strn	chr17	-	78977783	78977870	78977179	78977323	78980004	78980115	1806	2,0,1	5,9,12	0,1,3	13,11,11	236	149	0.603384	1	0.202,0.0,0.05	0.0,0.054,0.147	0.017		2700	ENSMUSG00000040663.10	Clcf1	chr19	+	4270231	4273544	4270231	4270398	4272127	4273544	2700	1,9,4	2,0,0	10,4,0	1,0,0	1878	149	1	1	0.038,1.0,1.0	0.442,1.0,NA	-0.042		958	ENSMUSG00000028677.20
1807	ENSMUSG00000024077.16	Strn	chr17	-	78995020	78995099	78991658	78991826	78999822	78999896	1807	43,41,52	4,0,0	61,52,46	0,0,0	228	149	0.783986	1	0.875,1.0,1.0	1.0,1.0,1.0	-0.042		2701	ENSMUSG00000032313.12	Tmem266	chr9	+	55342474	55345629	55342474	55342537	55344390	55345629	2701	0,0,0	1,0,1	1,0,0	0,0,3	2002	149	1	1	0.0,NA,0.0	1.0,NA,0.0	-0.5		959	ENSMUSG00000028677.20
1809	ENSMUSG00000024074.9	Crim1	chr17	+	78587401	78587644	78545170	78545344	78588674	78588795	1809	12,6,13	0,1,0	8,6,14	0,1,0	392	149	1	1	1.0,0.695,1.0	1.0,0.695,1.0	0		2705	ENSMUSG00000009555.17	Cdk9	chr2	-	32599478	32599956	32599478	32599627	32599784	32599956	2705	6,13,9	19,19,43	0,15,10	10,19,54	306	149	0.60682	1	0.133,0.25,0.092	0.0,0.278,0.083	0.038		963	ENSMUSG00000027751.14
1810	ENSMUSG00000024074.9	Crim1	chr17	+	78588674	78588795	78545200	78545344	78610415	78610537	1810	0,1,5	0,0,0	8,3,1	0,0,1	270	149	1	1	NA,1.0,1.0	1.0,1.0,0.356	0.215		2707	ENSMUSG00000025159.9	Mms19	chr19	-	41937893	41938276	41937893	41938020	41938207	41938276	2707	6,2,3	15,17,19	7,8,1	44,16,24	336	149	0.736161	1	0.151,0.05,0.065	0.066,0.181,0.018	0		965	ENSMUSG00000027751.14
1811	ENSMUSG00000024074.9	Crim1	chr17	+	78610415	78610537	78588674	78588795	78620552	78620617	1811	1,1,10	1,0,0	13,11,10	0,1,1	271	149	1	1	0.355,1.0,1.0	1.0,0.858,0.846	-0.116		2715	ENSMUSG00000040345.11	Arhgap9	chr10	+	127163962	127164393	127163962	127164016	127164258	127164393	2715	0,0,1	0,0,0	0,0,0	2,0,0	391	149	1	1	NA,NA,1.0	0.0,NA,NA	1		968	ENSMUSG00000024668.9
1812	ENSMUSG00000024074.9	Crim1	chr17	+	78675220	78675415	78662384	78662606	78677423	78677546	1812	10,16,19	1,0,1	23,13,30	0,1,0	344	149	1	1	0.812,1.0,0.892	1.0,0.849,1.0	-0.048		2717	ENSMUSG00000032308.10	Ulk3	chr9	+	57501033	57501329	57501033	57501136	57501264	57501329	2717	1,0,2	0,1,2	1,2,0	6,6,0	277	149	1	1	1.0,0.0,0.35	0.082,0.152,NA	0.333		970	ENSMUSG00000029577.14
1814	ENSMUSG00000002017.11	Fam98a	chr17	-	75848190	75848375	75847105	75847186	75851742	75851877	1814	65,63,78	0,0,1	55,55,83	0,0,0	334	149	1	1	1.0,1.0,0.972	1.0,1.0,1.0	-0.009		2721	ENSMUSG00000029148.16	Nrbp1	chr5	+	31401106	31401335	31401106	31401176	31401261	31401335	2721	25,29,34	1,0,1	24,18,49	0,0,0	234	149	1	1	0.941,1.0,0.956	1.0,1.0,1.0	-0.034		974	ENSMUSG00000028621.18
1815	ENSMUSG00000024078.8	Ttc27	chr17	+	75077237	75077351	75058056	75058123	75084638	75084734	1815	34,24,46	2,0,0	20,51,51	0,0,0	263	149	1	1	0.906,1.0,1.0	1.0,1.0,1.0	-0.031		2724	ENSMUSG00000004667.19	Polr2e	chr10	-	79872360	79872807	79872360	79872432	79872597	79872807	2724	1,4,2	47,63,97	2,0,3	76,91,74	314	149	0.642141	1	0.01,0.029,0.01	0.012,0.0,0.019	0.006		980	ENSMUSG00000028552.14
1816	ENSMUSG00000024078.8	Ttc27	chr17	+	75136486	75136585	75106178	75106406	75142327	75142380	1816	61,39,55	0,1,0	51,67,78	0,0,0	248	149	1	1	1.0,0.959,1.0	1.0,1.0,1.0	-0.014		2726	ENSMUSG00000009687.15	Fxyd5	chr7	-	30732154	30732443	30732154	30732305	30732397	30732443	2726	3,1,0	0,0,0	7,2,0	1,0,0	241	149	1	1	1.0,1.0,NA	0.812,1.0,NA	0.094		983	ENSMUSG00000020594.15
1817	ENSMUSG00000024078.8	Ttc27	chr17	+	75136486	75136585	75106178	75106406	75147293	75147459	1817	1,7,10	0,0,0	12,19,6	2,0,0	248	149	1	1	1.0,1.0,1.0	0.783,1.0,1.0	0.072		2727	ENSMUSG00000009687.15	Fxyd5	chr7	-	30732154	30734708	30732154	30732443	30734633	30734708	2727	0,2,0	0,1,0	1,7,2	0,0,0	2339	149	1	1	NA,0.113,NA	1.0,1.0,1.0	-0.887		984	ENSMUSG00000024037.14
1818	ENSMUSG00000024078.8	Ttc27	chr17	+	75142327	75142380	75106178	75106406	75147293	75147459	1818	1,3,6	0,0,0	2,6,9	2,0,0	202	149	0.685191	1	1.0,1.0,1.0	0.425,1.0,1.0	0.192		2728	ENSMUSG00000036570.15	Fxyd1	chr7	-	30751102	30751412	30751102	30751240	30751357	30751412	2728	1,0,0	1,2,1	0,1,0	4,0,4	266	149	1	1	0.359,0.0,0.0	0.0,1.0,0.0	-0.214		987	ENSMUSG00000029478.17
1819	ENSMUSG00000024078.8	Ttc27	chr17	+	75142327	75142380	75136486	75136585	75147293	75147459	1819	61,34,52	0,0,0	43,55,82	4,0,0	202	149	0.789462	1	1.0,1.0,1.0	0.888,1.0,1.0	0.037		2729	ENSMUSG00000001249.15	Hpn	chr7	-	30802578	30802848	30802578	30802619	30802725	30802848	2729	0,0,1	0,0,1	0,0,0	6,0,0	255	149	1	1	NA,NA,0.369	0.0,NA,NA	0.369		988	ENSMUSG00000029478.17
1820	ENSMUSG00000024078.8	Ttc27	chr17	+	75144818	75144895	75142327	75142380	75147293	75147459	1820	0,0,0	55,33,51	0,1,0	38,46,82	226	149	1	1	0.0,0.0,0.0	0.0,0.014,0.0	-0.005		2738	ENSMUSG00000002068.17	Ccne1	chr7	-	37805703	37806108	37805703	37805772	37806020	37806108	2738	2,3,3	76,60,96	2,2,1	35,99,108	397	149	1	1	0.01,0.018,0.012	0.021,0.008,0.003	0.003		989	ENSMUSG00000036792.13
1821	ENSMUSG00000024078.8	Ttc27	chr17	+	75147293	75147459	75136486	75136585	75163403	75163601	1821	2,6,9	0,0,1	14,1,19	0,0,0	315	149	1	1	1.0,1.0,0.81	1.0,1.0,1.0	-0.063		2739	ENSMUSG00000033105.13	Lss	chr10	+	76371392	76372199	76371392	76371501	76372077	76372199	2739	10,6,11	26,29,21	11,10,8	24,24,34	725	149	0.983337	1	0.073,0.041,0.097	0.086,0.079,0.046	0		990	ENSMUSG00000033557.18
1822	ENSMUSG00000024073.17	Birc6	chr17	+	74901316	74901448	74900083	74900244	74901864	74901996	1822	14,17,28	3,1,0	19,30,18	0,1,0	281	149	0.253799	1	0.712,0.9,1.0	1.0,0.941,1.0	-0.11		2742	ENSMUSG00000070000.14	Fcho1	chr8	-	72169785	72170154	72169785	72169927	72170079	72170154	2742	0,2,2	1,0,6	5,1,0	3,2,0	301	149	1	1	0.0,1.0,0.142	0.452,0.198,NA	0.056		994	ENSMUSG00000074802.12
1823	ENSMUSG00000024073.17	Birc6	chr17	+	74901358	74901448	74900083	74900244	74901864	74901996	1823	24,22,23	3,1,0	25,18,32	0,1,0	239	149	0.352872	1	0.833,0.932,1.0	1.0,0.918,1.0	-0.051		2746	ENSMUSG00000024947.18	Men1	chr19	+	6385068	6385935	6385068	6385112	6385474	6385935	2746	33,21,46	2,0,0	23,16,26	0,3,0	511	149	0.618515	1	0.828,1.0,1.0	1.0,0.609,1.0	0.073		996	ENSMUSG00000062270.15
1827	ENSMUSG00000024072.10	Yipf4	chr17	+	74797475	74797707	74796544	74796789	74799340	74799500	1827	0,0,0	22,15,20	1,2,2	14,8,16	381	149	0.477468	1	0.0,0.0,0.0	0.027,0.089,0.047	-0.054		2747	ENSMUSG00000024947.18	Men1	chr19	+	6388312	6388991	6388312	6388449	6388855	6388991	2747	13,5,11	39,19,57	8,12,17	50,36,48	555	149	0.722583	1	0.082,0.066,0.049	0.041,0.082,0.087	-0.004		1000	ENSMUSG00000066151.13
1831	ENSMUSG00000024069.15	Slc30a6	chr17	+	74726526	74726595	74722614	74722717	74730011	74730661	1831	0,1,3	0,2,2	7,5,2	0,0,0	218	149	1	1	NA,0.255,0.506	1.0,1.0,1.0	-0.619		2751	ENSMUSG00000040940.19	Arhgef1	chr7	+	24611481	24611777	24611481	24611580	24611734	24611777	2751	7,7,8	6,12,10	11,9,6	6,20,14	303	149	0.818074	1	0.365,0.223,0.282	0.474,0.181,0.174	0.014		1002	ENSMUSG00000000823.17
1832	ENSMUSG00000058704.10	Memo1	chr17	-	74524021	74524098	74509255	74509360	74532426	74532569	1832	39,30,55	0,3,6	36,43,69	1,6,4	226	149	0.840866	1	1.0,0.868,0.858	0.96,0.825,0.919	0.007		2754	ENSMUSG00000040940.19	Arhgef1	chr7	+	24624220	24624487	24624220	24624308	24624400	24624487	2754	0,0,0	17,9,7	1,0,0	10,7,16	241	149	1	1	0.0,0.0,0.0	0.058,0.0,0.0	-0.019		1005	ENSMUSG00000042790.17
1836	ENSMUSG00000058704.10	Memo1	chr17	-	74532426	74532569	74524021	74524098	74548899	74549011	1836	40,23,57	0,0,0	33,41,62	0,1,0	292	149	1	1	1.0,1.0,1.0	1.0,0.954,1.0	0.015		2757	ENSMUSG00000020812.19	Snhg16	chr11	+	116565125	116566624	116565125	116565201	116566314	116566624	2757	53,72,56	0,4,3	57,73,80	0,6,3	1262	149	0.857793	1	1.0,0.68,0.688	1.0,0.59,0.759	0.006		1020	ENSMUSG00000053565.11
1837	ENSMUSG00000058704.10	Memo1	chr17	-	74548899	74549011	74532426	74532569	74562222	74562291	1837	22,7,30	2,0,1	19,25,25	0,0,0	261	149	0.556279	1	0.863,1.0,0.945	1.0,1.0,1.0	-0.064		2758	ENSMUSG00000020812.19	Snhg16	chr11	+	116565125	116566624	116565125	116565201	116566333	116566624	2758	53,72,56	6,5,7	57,73,80	9,4,8	1281	149	0.970618	1	0.507,0.626,0.482	0.424,0.68,0.538	-0.009		1024	ENSMUSG00000023079.15
1841	ENSMUSG00000024059.11	Clip4	chr17	+	72113499	72113736	72110550	72110669	72117841	72117977	1841	19,14,19	0,0,1	15,8,16	1,0,0	386	149	1	1	1.0,1.0,0.88	0.853,1.0,1.0	0.009		2771	ENSMUSG00000017119.21	Nbr1	chr11	+	101465824	101466242	101465824	101465941	101466049	101466242	2771	51,36,50	0,4,0	76,78,60	0,1,1	257	149	0.676218	1	1.0,0.839,1.0	1.0,0.978,0.972	-0.037		1026	ENSMUSG00000060147.16
1843	ENSMUSG00000024059.11	Clip4	chr17	+	72131684	72131825	72117841	72117977	72134686	72134776	1843	3,13,13	0,1,0	8,7,14	1,0,0	290	149	1	1	1.0,0.87,1.0	0.804,1.0,1.0	0.022		2773	ENSMUSG00000045411.17	2410002F23Rik	chr7	+	43899732	43901736	43899732	43899764	43900036	43901736	2773	31,7,25	65,49,70	21,24,27	64,59,89	421	149	0.927364	1	0.144,0.048,0.112	0.104,0.126,0.097	-0.008		1027	ENSMUSG00000060147.16
1846	ENSMUSG00000024059.11	Clip4	chr17	+	72156886	72156959	72144688	72144753	72163222	72163337	1846	2,5,4	0,0,0	3,6,1	0,1,0	222	149	1	1	1.0,1.0,1.0	1.0,0.801,1.0	0.066		2775	ENSMUSG00000051113.10	Fam71e1	chr7	+	44149573	44150557	44149573	44149862	44150391	44150557	2775	3,1,0	0,0,0	9,13,2	0,0,1	678	149	1	1	1.0,1.0,NA	1.0,1.0,0.305	0.232		1029	ENSMUSG00000060147.16
1847	ENSMUSG00000024059.11	Clip4	chr17	+	72163222	72163348	72156886	72156959	72170753	72171081	1847	1,2,3	1,0,0	0,4,2	0,0,0	275	149	1	1	0.351,1.0,1.0	NA,1.0,1.0	-0.216		2778	ENSMUSG00000027889.18	Ampd2	chr3	-	107987582	107988090	107987582	107987651	107987959	107988090	2778	4,12,6	26,12,39	7,6,4	21,24,24	457	149	0.690142	1	0.048,0.246,0.048	0.098,0.075,0.052	0.039		1032	ENSMUSG00000039137.19
1850	ENSMUSG00000024054.15	Smchd1	chr17	-	71772588	71772664	71770756	71770918	71781973	71782338	1850	109140108	0,2,0	118149154	0,3,0	225	149	1	1	1.0,0.979,1.0	1.0,0.97,1.0	0.003		2780	ENSMUSG00000038644.15	Pold1	chr7	-	44183308	44183911	44183308	44183441	44183808	44183911	2780	18,18,17	0,2,3	28,32,34	1,2,3	516	149	0.7309	1	1.0,0.722,0.621	0.89,0.822,0.766	-0.045		1033	ENSMUSG00000016933.18
1851	ENSMUSG00000024053.12	Emilin2	chr17	-	71587668	71587844	71580368	71582282	71617143	71617266	1851	17,12,15	0,0,0	27,25,15	0,0,2	325	149	1	1	1.0,1.0,1.0	1.0,1.0,0.775	0.075		2783	ENSMUSG00000060601.14	Nr1h2	chr7	-	44201378	44202044	44201378	44201669	44201930	44202044	2783	28,18,19	5,7,4	18,31,21	5,5,5	410	149	0.767027	1	0.671,0.483,0.633	0.567,0.693,0.604	-0.026		1039	ENSMUSG00000051517.15
1852	ENSMUSG00000024052.18	Lpin2	chr17	+	71529049	71529145	71521958	71522159	71531934	71532236	1852	19,11,13	0,0,2	16,21,18	0,0,0	245	149	1	1	1.0,1.0,0.798	1.0,1.0,1.0	-0.067		2784	ENSMUSG00000060601.14	Nr1h2	chr7	-	44201378	44202044	44201378	44201767	44201930	44202044	2784	25,13,15	2,2,0	18,28,14	0,2,2	312	149	0.919401	1	0.857,0.756,1.0	1.0,0.87,0.77	-0.009		1040	ENSMUSG00000028453.11
1853	ENSMUSG00000024052.18	Lpin2	chr17	+	71531934	71532236	71521958	71522159	71536302	71536410	1853	19,16,17	0,0,0	23,23,31	0,0,1	451	149	1	1	1.0,1.0,1.0	1.0,1.0,0.911	0.03		2785	ENSMUSG00000060601.14	Nr1h2	chr7	-	44203002	44203347	44203002	44203132	44203228	44203347	2785	2,0,14	1,0,0	3,5,4	0,0,0	245	149	1	1	0.549,NA,1.0	1.0,1.0,1.0	-0.226		1041	ENSMUSG00000028453.11
1855	ENSMUSG00000024052.18	Lpin2	chr17	+	71537266	71537390	71536302	71536410	71538177	71538500	1855	49,25,25	0,0,1	33,27,34	0,0,0	273	149	1	1	1.0,1.0,0.932	1.0,1.0,1.0	-0.023		2786	ENSMUSG00000060601.14	Nr1h2	chr7	-	44203002	44203347	44203002	44203132	44203232	44203347	2786	2,0,14	9,9,2	3,5,4	3,10,16	249	149	0.907769	1	0.117,0.0,0.807	0.374,0.23,0.13	0.063		1044	ENSMUSG00000041459.16
1856	ENSMUSG00000024052.18	Lpin2	chr17	+	71549038	71549189	71548638	71548721	71549620	71549765	1856	0,0,0	14,14,23	0,2,0	16,16,24	300	149	1	1	0.0,0.0,0.0	0.0,0.058,0.0	-0.019		2790	ENSMUSG00000038502.18	Ptov1	chr7	-	44512958	44513911	44512958	44513156	44513806	44513911	2790	108,81,91	280248352	76137113	344331412	799	149	0.604107	1	0.067,0.057,0.046	0.04,0.072,0.049	0.003		1045	ENSMUSG00000041459.16
1857	ENSMUSG00000024052.18	Lpin2	chr17	+	71552113	71552228	71551766	71551919	71553410	71553449	1857	51,37,28	0,0,0	28,53,39	0,0,1	264	149	1	1	1.0,1.0,1.0	1.0,1.0,0.957	0.014		2792	ENSMUSG00000008690.16	Ncaph2	chr15	+	89247807	89248037	89247807	89247892	89247968	89248037	2792	7,1,8	90,85,158	9,11,6	198191182	225	149	0.910003	1	0.049,0.008,0.032	0.029,0.037,0.021	0.001		1046	ENSMUSG00000041459.16
1858	ENSMUSG00000024048.16	Myl12a	chr17	-	71306983	71307229	71303691	71303890	71309102	71309182	1858	6,4,2	305240414	4,5,5	287403406	395	149	1	1	0.007,0.006,0.002	0.005,0.005,0.005	0		2795	ENSMUSG00000008690.16	Ncaph2	chr15	+	89254955	89255196	89254955	89255011	89255094	89255196	2795	6,8,2	41,25,73	7,7,6	55,51,73	232	149	0.81432	1	0.086,0.17,0.017	0.076,0.081,0.05	0.022		1047	ENSMUSG00000041459.16
1859	ENSMUSG00000047407.18	Tgif1	chr17	-	71156641	71156799	71153289	71153393	71157866	71158126	1859	2,2,0	7,1,19	0,2,0	5,9,16	307	149	0.338355	1	0.122,0.493,0.0	0.0,0.097,0.0	0.173		2797	ENSMUSG00000003184.16	Irf3	chr7	+	44649795	44650446	44649795	44649970	44650068	44650446	2797	2,1,8	2,2,4	13,5,1	12,2,2	247	149	0.93709	1	0.376,0.232,0.547	0.395,0.601,0.232	-0.024		1048	ENSMUSG00000041459.16
1864	ENSMUSG00000024044.20	Epb41l3	chr17	+	69572899	69573427	69569174	69569341	69577605	69577659	1864	1,0,0	11,7,4	1,1,2	8,11,5	677	149	0.55862	1	0.02,0.0,0.0	0.027,0.02,0.081	-0.036		2798	ENSMUSG00000040463.17	Mybbp1a	chr11	+	72333395	72333679	72333395	72333470	72333571	72333679	2798	12,13,23	282247428	15,21,20	312394425	250	149	1	1	0.025,0.03,0.031	0.028,0.031,0.027	0		1054	ENSMUSG00000026600.13
1865	ENSMUSG00000024044.20	Epb41l3	chr17	+	69577605	69577659	69569120	69569341	69581698	69581890	1865	15,5,4	0,2,0	5,9,5	0,0,0	203	149	1	1	1.0,0.647,1.0	1.0,1.0,1.0	-0.118		2800	ENSMUSG00000040463.17	Mybbp1a	chr11	+	72338378	72338708	72338378	72338465	72338555	72338708	2800	10,3,5	107,80,121	9,3,8	87109153	239	149	0.988368	1	0.055,0.023,0.025	0.061,0.017,0.032	-0.002		1060	ENSMUSG00000039748.12
1866	ENSMUSG00000024044.20	Epb41l3	chr17	+	69580876	69580912	69577605	69577659	69581698	69581890	1866	0,0,0	14,5,7	0,1,0	3,9,5	185	149	1	1	0.0,0.0,0.0	0.0,0.082,0.0	-0.027		2803	ENSMUSG00000020231.16	Dip2a	chr10	-	76115539	76115800	76115539	76115620	76115690	76115800	2803	2,3,1	4,3,6	1,1,3	4,5,10	219	149	0.939063	1	0.254,0.405,0.102	0.145,0.12,0.17	0.109		1061	ENSMUSG00000039748.12
1868	ENSMUSG00000024044.20	Epb41l3	chr17	+	69581698	69581890	69577605	69577659	69588027	69588102	1868	15,7,9	0,0,1	3,9,7	0,0,0	341	149	1	1	1.0,1.0,0.797	1.0,1.0,1.0	-0.068		2806	ENSMUSG00000020527.15	Myo19	chr11	+	84796365	84798228	84796365	84796469	84798061	84798228	2806	14,20,18	11,15,28	16,24,5	14,19,18	1741	149	0.741746	1	0.098,0.102,0.052	0.089,0.098,0.023	0.014		1062	ENSMUSG00000039748.12
1869	ENSMUSG00000024044.20	Epb41l3	chr17	+	69581698	69581890	69577605	69577659	69590879	69591002	1869	15,7,9	0,0,0	3,9,8	0,1,0	341	149	1	1	1.0,1.0,1.0	1.0,0.797,1.0	0.068		2809	ENSMUSG00000042918.18	Mamstr	chr7	+	45292171	45292748	45292171	45292353	45292660	45292748	2809	1,1,1	0,0,2	0,7,3	0,0,0	456	149	1	1	1.0,1.0,0.14	NA,1.0,1.0	-0.287		1063	ENSMUSG00000039748.12
1870	ENSMUSG00000024044.20	Epb41l3	chr17	+	69581698	69581890	69577605	69577659	69591533	69591911	1870	32,18,23	1,0,1	19,23,17	0,0,0	341	149	1	1	0.933,1.0,0.91	1.0,1.0,1.0	-0.052		2811	ENSMUSG00000040136.11	Abcc8	chr7	-	45756661	45757638	45756661	45756740	45757507	45757638	2811	1,0,1	0,0,0	0,3,1	1,0,0	916	149	1	1	1.0,NA,1.0	0.0,1.0,1.0	0.333		1067	ENSMUSG00000062929.9
1871	ENSMUSG00000024044.20	Epb41l3	chr17	+	69588027	69588102	69577605	69577659	69590879	69591002	1871	0,0,1	0,0,0	0,0,0	0,1,0	224	149	1	1	NA,NA,1.0	NA,0.0,NA	1		2814	ENSMUSG00000022721.20	Trmt2a	chr16	+	18068683	18069524	18068683	18068865	18069412	18069524	2814	33,21,32	6,0,2	23,24,28	1,2,5	696	149	0.638092	1	0.541,1.0,0.774	0.831,0.72,0.545	0.073		1068	ENSMUSG00000062929.9
1876	ENSMUSG00000024044.20	Epb41l3	chr17	+	69590879	69591002	69577605	69577659	69591533	69591885	1876	0,1,0	1,0,1	0,1,0	0,0,0	272	149	1	1	0.0,1.0,0.0	NA,1.0,NA	-0.667		2816	ENSMUSG00000002820.7	Atg4d	chr9	+	21179546	21179965	21179546	21179823	21179900	21179965	2816	0,0,3	7,3,9	0,1,0	3,2,4	226	149	0.805707	1	0.0,0.0,0.18	0.0,0.248,0.0	-0.023		1070	ENSMUSG00000002221.12
1877	ENSMUSG00000024044.20	Epb41l3	chr17	+	69590879	69591002	69581698	69581890	69591533	69591885	1877	0,1,0	17,11,14	0,0,1	16,14,10	272	149	1	1	0.0,0.047,0.0	0.0,0.0,0.052	-0.002		2818	ENSMUSG00000030214.8	Plbd1	chr6	-	136593924	136594400	136593924	136594065	136594199	136594400	2818	4,0,0	1,0,0	0,0,0	0,2,0	283	149	1	1	0.678,NA,NA	NA,0.0,NA	0.678		1071	ENSMUSG00000034071.16
1879	ENSMUSG00000024044.20	Epb41l3	chr17	+	69594606	69594723	69594251	69594332	69595845	69596319	1879	5,9,9	11,7,6	5,14,17	7,6,13	266	149	0.432137	1	0.203,0.419,0.457	0.286,0.567,0.423	-0.066		2823	ENSMUSG00000003421.14	Nosip	chr7	+	44725492	44725852	44725492	44725652	44725733	44725852	2823	4,0,6	18,20,47	3,8,2	35,40,54	230	149	0.778462	1	0.126,0.0,0.076	0.053,0.115,0.023	0.004		1073	ENSMUSG00000032712.17
1885	ENSMUSG00000033278.11	Ptprm	chr17	-	67352978	67353153	67349089	67349383	67370036	67370152	1885	28,22,30	0,0,0	26,37,29	0,2,0	324	149	1	1	1.0,1.0,1.0	1.0,0.895,1.0	0.035		2824	ENSMUSG00000025512.16	Chid1	chr7	-	141102521	141107618	141102521	141102614	141107511	141107618	2824	23,45,30	0,0,0	57,42,38	0,1,0	5046	149	1	1	1.0,1.0,1.0	1.0,0.554,1.0	0.149		1075	ENSMUSG00000032712.17
1886	ENSMUSG00000023460.14	Rab12	chr17	-	66811983	66812173	66807343	66807443	66813027	66813088	1886	3,6,8	14,11,5	18,2,13	8,7,15	339	149	0.278734	1	0.086,0.193,0.413	0.497,0.112,0.276	-0.064		2829	ENSMUSG00000008373.17	Prpf31	chr7	+	3637691	3639357	3637691	3637861	3639199	3639357	2829	34,13,15	66,46,77	13,42,14	86,70,74	1487	149	0.700523	1	0.049,0.028,0.019	0.015,0.057,0.019	0.002		1076	ENSMUSG00000040410.15
1887	ENSMUSG00000035842.11	Ddx11	chr17	+	66447183	66447228	66446392	66446472	66447345	66447413	1887	19,15,29	0,0,2	9,20,28	0,0,0	194	149	1	1	1.0,1.0,0.918	1.0,1.0,1.0	-0.027		2833	ENSMUSG00000028949.14	Smarcd3	chr5	-	24800387	24800843	24800387	24800483	24800720	24800843	2833	2,1,10	9,1,9	3,8,2	0,14,6	386	149	0.684948	1	0.079,0.279,0.3	1.0,0.181,0.114	-0.212		1082	ENSMUSG00000032410.14
1890	ENSMUSG00000024091.10	Vapa	chr17	-	65894038	65894161	65889574	65889748	65899285	65899366	1890	0,0,1	58,56,76	0,0,0	110,88,106	272	149	1	1	0.0,0.0,0.007	0.0,0.0,0.0	0.002		2838	ENSMUSG00000030516.15	Tjp1	chr7	-	64962302	64963172	64962302	64962544	64962669	64963172	2838	150106195	0,0,0	256213267	4,0,0	274	149	1	1	1.0,1.0,1.0	0.972,1.0,1.0	0.009		1084	ENSMUSG00000042228.15
1891	ENSMUSG00000024083.17	Pja2	chr17	-	64604718	64604904	64599833	64600019	64615616	64616661	1891	30,30,38	19,14,8	33,53,67	11,15,16	335	149	0.216381	1	0.413,0.488,0.679	0.572,0.611,0.651	-0.085		2844	ENSMUSG00000097075.4	Cdiptos	chr7	-	126573624	126574256	126573624	126573682	126574111	126574256	2844	0,0,2	0,0,0	1,0,0	0,0,2	578	149	1	1	NA,NA,1.0	1.0,NA,0.0	0.5		1089	ENSMUSG00000062234.15
1893	ENSMUSG00000000127.16	Fer	chr17	+	64298588	64298711	64288474	64288681	64336284	64336341	1893	8,11,29	0,0,0	12,12,19	0,0,1	272	149	1	1	1.0,1.0,1.0	1.0,1.0,0.912	0.029		2845	ENSMUSG00000097075.4	Cdiptos	chr7	-	126573850	126574256	126573850	126573884	126574111	126574256	2845	0,0,2	0,0,0	1,0,0	1,0,0	376	149	1	1	NA,NA,1.0	0.284,NA,NA	0.716		1090	ENSMUSG00000027091.15
1896	ENSMUSG00000024227.15	Pdzph1	chr17	-	59195002	59195160	59192854	59192897	59229563	59229742	1896	1,2,4	0,1,0	2,5,4	0,0,0	307	149	1	1	1.0,0.493,1.0	1.0,1.0,1.0	-0.169		2846	ENSMUSG00000078671.12	Chd2	chr7	-	73091333	73091547	73091333	73091427	73091516	73091547	2846	52,40,50	0,2,0	131,74,104	0,0,0	238	149	1	1	1.0,0.926,1.0	1.0,1.0,1.0	-0.025		1093	ENSMUSG00000028137.10
1897	ENSMUSG00000024227.15	Pdzph1	chr17	-	59229563	59229742	59195002	59195160	59239412	59239523	1897	2,2,6	0,0,1	3,3,2	0,0,0	328	149	1	1	1.0,1.0,0.732	1.0,1.0,1.0	-0.089		2849	ENSMUSG00000029661.17	Col1a2	chr6	+	4534580	4535488	4534580	4534688	4535380	4535488	2849	40,38,25	27,14,26	35,29,19	19,24,19	841	149	0.578819	1	0.208,0.325,0.146	0.246,0.176,0.151	0.035		1099	ENSMUSG00000033961.17
1899	ENSMUSG00000019487.12	Trip10	chr17	+	57557954	57558011	57557703	57557857	57560261	57560402	1899	22,14,33	1,1,0	20,25,24	0,0,1	206	149	1	1	0.941,0.91,1.0	1.0,1.0,0.946	-0.032		2851	ENSMUSG00000027374.13	Mrps5	chr2	+	127438819	127440196	127438819	127438854	127440105	127440196	2851	12,15,10	7,6,1	6,8,7	2,1,3	1400	149	0.963441	1	0.154,0.21,0.516	0.242,0.46,0.199	-0.007		1102	ENSMUSG00000003038.16
1900	ENSMUSG00000019487.12	Trip10	chr17	+	57563859	57564027	57562272	57562467	57564234	57564344	1900	0,0,0	33,18,26	1,2,0	24,45,25	317	149	1	1	0.0,0.0,0.0	0.019,0.02,0.0	-0.013		2852	ENSMUSG00000022967.14	Ifnar1	chr16	+	91301942	91304329	91301942	91302302	91303414	91304329	2852	153182195	0,0,0	179194234	1,0,0	1261	149	1	1	1.0,1.0,1.0	0.955,1.0,1.0	0.015		1103	ENSMUSG00000032580.13
1904	ENSMUSG00000002668.9	Dennd1c	chr17	-	57374916	57374949	57374788	57374833	57377112	57377184	1904	0,0,0	0,3,0	0,2,0	0,0,3	182	149	1	1	NA,0.0,NA	NA,1.0,0.0	-0.5		2854	ENSMUSG00000041945.13	Mfsd9	chr1	-	40823536	40825370	40823536	40823666	40825326	40825370	2854	0,1,1	0,0,0	4,11,2	2,0,3	1809	149	1	1	NA,1.0,1.0	0.141,1.0,0.052	0.602		1104	ENSMUSG00000058392.14
1906	ENSMUSG00000002660.9	Clpp	chr17	+	57299825	57300013	57298293	57298390	57300447	57300553	1906	107111111	1,0,5	108141144	1,0,1	337	149	0.269242	1	0.979,1.0,0.908	0.979,1.0,0.985	-0.026		2859	ENSMUSG00000038930.12	Rccd1	chr7	-	79970049	79970929	79970049	79970446	79970609	79970929	2859	19,27,28	0,0,2	41,51,34	0,0,0	312	149	1	1	1.0,1.0,0.87	1.0,1.0,1.0	-0.043		1105	ENSMUSG00000058392.14
1907	ENSMUSG00000024206.16	Rfx2	chr17	-	57106249	57106324	57094578	57094760	57110477	57110739	1907	0,0,0	3,7,2	1,1,0	2,2,3	224	149	1	1	0.0,0.0,0.0	0.25,0.25,0.0	-0.167		2860	ENSMUSG00000038886.11	Man2a2	chr7	-	80019340	80020677	80019340	80019493	80020479	80020677	2860	20,14,17	6,10,19	18,16,13	5,20,12	1135	149	0.753703	1	0.304,0.155,0.105	0.321,0.095,0.125	0.008		1106	ENSMUSG00000058392.14
1908	ENSMUSG00000024206.16	Rfx2	chr17	-	57111325	57111396	57106908	57110739	57112357	57112447	1908	10,4,15	0,0,0	4,7,6	1,0,0	220	149	1	1	1.0,1.0,1.0	0.73,1.0,1.0	0.09		2863	ENSMUSG00000053158.11	Fes	chr7	-	80030912	80031558	80030912	80031035	80031348	80031558	2863	2,0,0	0,2,0	0,0,3	0,0,0	462	149	1	1	1.0,0.0,NA	NA,NA,1.0	-0.5		1113	ENSMUSG00000086290.10
1909	ENSMUSG00000024206.16	Rfx2	chr17	-	57115233	57115325	57112357	57112447	57137882	57137939	1909	10,3,2	3,0,6	1,1,3	0,3,0	241	149	0.10167	1	0.673,1.0,0.171	1.0,0.171,1.0	-0.109		2866	ENSMUSG00000053158.11	Fes	chr7	-	80033581	80034035	80033581	80033765	80033938	80034035	2866	0,1,0	4,1,1	0,0,0	0,1,2	322	149	1	1	0.0,0.316,0.0	NA,0.0,0.0	0.105		1115	ENSMUSG00000070436.13
1910	ENSMUSG00000007603.10	Dus3l	chr17	+	57075347	57075902	57075033	57075150	57076438	57076840	1910	24,17,17	0,0,1	21,26,27	0,0,0	704	149	1	1	1.0,1.0,0.783	1.0,1.0,1.0	-0.072		2868	ENSMUSG00000092607.10	Scnm1	chr3	-	95040510	95040939	95040510	95040599	95040868	95040939	2868	22,19,15	25,12,50	16,26,15	24,30,42	418	149	0.608873	1	0.239,0.361,0.097	0.192,0.236,0.113	0.052		1118	ENSMUSG00000040225.16
1911	ENSMUSG00000002379.8	Ndufa11	chr17	+	57028318	57028441	57028034	57028127	57028984	57029135	1911	125,96,180	0,2,2	89155151	0,2,2	272	149	0.965372	1	1.0,0.963,0.98	1.0,0.977,0.976	-0.003		2872	ENSMUSG00000020859.17	Spag9	chr11	+	93983163	93983808	93983163	93983253	93983640	93983808	2872	2,1,10	9,15,13	3,3,5	11,12,10	536	149	0.625184	1	0.058,0.018,0.176	0.07,0.065,0.122	-0.002		1126	ENSMUSG00000049550.18
1912	ENSMUSG00000002379.8	Ndufa11	chr17	+	57028358	57028441	57028034	57028127	57028984	57029141	1912	75,51,74	0,2,2	40,60,72	0,2,2	232	149	0.904889	1	1.0,0.942,0.96	1.0,0.951,0.959	-0.003		2881	ENSMUSG00000000148.18	Brat1	chr5	+	140695892	140697408	140695892	140696047	140697260	140697408	2881	9,8,10	1,0,1	6,22,7	0,0,0	1362	149	1	1	0.496,1.0,0.522	1.0,1.0,1.0	-0.327		1127	ENSMUSG00000049550.18
1913	ENSMUSG00000054723.7	Vmac	chr17	-	57023633	57023800	57022701	57022817	57024597	57024685	1913	4,0,4	1,0,0	3,1,6	0,1,0	316	149	1	1	0.654,NA,1.0	1.0,0.32,1.0	0.054		2883	ENSMUSG00000000148.18	Brat1	chr5	+	140698259	140698927	140698259	140698656	140698807	140698927	2883	2,1,2	2,1,0	0,1,1	0,0,0	300	149	1	1	0.332,0.332,1.0	NA,1.0,1.0	-0.445		1130	ENSMUSG00000034007.11
1914	ENSMUSG00000002372.10	Ranbp3	chr17	+	56998744	56998882	56993005	56993061	56999520	56999721	1914	0,0,0	0,1,6	2,0,0	4,0,0	287	149	1	1	NA,0.0,0.0	0.206,NA,NA	-0.206		2886	ENSMUSG00000034684.13	Sema3f	chr9	-	107561420	107561790	107561420	107561578	107561748	107561790	2886	7,6,6	4,10,19	8,5,6	7,11,14	319	149	0.963226	1	0.45,0.219,0.129	0.348,0.175,0.167	0.036		1134	ENSMUSG00000030120.15
1915	ENSMUSG00000002372.10	Ranbp3	chr17	+	56999520	56999721	56993005	56993061	57003601	57003638	1915	14,17,40	27,21,43	20,20,17	18,17,47	350	149	0.892425	1	0.181,0.256,0.284	0.321,0.334,0.133	-0.022		2887	ENSMUSG00000023262.14	Acy1	chr9	-	106311728	106312028	106311728	106311797	106311883	106312028	2887	3,1,2	10,14,35	1,0,6	33,36,25	235	149	0.943047	1	0.16,0.043,0.035	0.019,0.0,0.132	0.029		1135	ENSMUSG00000026889.13
1917	ENSMUSG00000002372.10	Ranbp3	chr17	+	57008448	57008541	57008022	57008088	57009762	57009890	1917	72,56,89	0,0,4	39,60,74	2,3,2	242	149	0.116766	1	1.0,1.0,0.932	0.923,0.925,0.958	0.042		2891	ENSMUSG00000041343.20	Ankrd42	chr7	-	92259451	92259858	92259451	92259579	92259752	92259858	2891	1,0,4	0,0,2	0,8,3	0,0,0	322	149	1	1	1.0,NA,0.481	NA,1.0,1.0	-0.26		1139	ENSMUSG00000109324.3
1918	ENSMUSG00000002372.10	Ranbp3	chr17	+	57012456	57012570	57008022	57009890	57013861	57013965	1918	145110197	0,2,4	114161171	0,1,0	263	149	0.602605	1	1.0,0.969,0.965	1.0,0.989,1.0	-0.018		2892	ENSMUSG00000033543.18	Gtf2a2	chr9	+	69924100	69924473	69924100	69924205	69924354	69924473	2892	8,9,6	0,0,0	5,10,8	0,0,2	298	149	1	1	1.0,1.0,1.0	1.0,1.0,0.667	0.111		1140	ENSMUSG00000109324.3
1921	ENSMUSG00000040828.11	Catsperd	chr17	+	56948476	56948590	56943270	56943335	56954727	56954811	1921	0,1,0	0,0,0	5,0,1	1,0,0	263	149	1	1	NA,1.0,NA	0.739,NA,1.0	0.131		2898	ENSMUSG00000003863.19	Ppfia3	chr7	-	44989998	44990410	44989998	44990170	44990341	44990410	2898	0,2,0	0,0,0	0,0,0	3,0,0	320	149	1	1	NA,1.0,NA	0.0,NA,NA	1		1141	ENSMUSG00000070953.14
1925	ENSMUSG00000042625.17	Safb2	chr17	-	56881201	56881302	56878399	56878549	56881902	56881952	1925	70,63,69	0,1,4	63,96,81	0,1,1	250	149	0.602878	1	1.0,0.974,0.911	1.0,0.983,0.98	-0.026		2904	ENSMUSG00000047767.18	Atg16l2	chr7	-	100940693	100941206	100940693	100940799	100941085	100941206	2904	4,4,0	7,4,0	8,1,5	7,7,0	435	149	1	1	0.164,0.255,NA	0.281,0.047,1.0	-0.233		1143	ENSMUSG00000020782.19
1926	ENSMUSG00000042625.17	Safb2	chr17	-	56882354	56883012	56881902	56881952	56883877	56883905	1926	99,76,110	0,1,4	73138104	1,2,2	807	149	0.515821	1	1.0,0.933,0.835	0.931,0.927,0.906	0.001		2905	ENSMUSG00000047767.18	Atg16l2	chr7	-	100941314	100941631	100941314	100941386	100941560	100941631	2905	0,0,2	3,3,0	1,2,0	4,1,0	323	149	1	1	0.0,0.0,1.0	0.103,0.48,NA	0.042		1151	ENSMUSG00000036281.14
1927	ENSMUSG00000013236.18	Ptprs	chr17	-	56725909	56726085	56725710	56725830	56726403	56726527	1927	187183217	0,0,0	261180223	0,1,0	325	149	1	1	1.0,1.0,1.0	1.0,0.988,1.0	0.004		2911	ENSMUSG00000070424.13	Art5	chr7	-	101746987	101747717	101746987	101747141	101747435	101747717	2911	5,2,3	0,0,0	4,3,0	2,0,0	443	149	1	1	1.0,1.0,1.0	0.402,1.0,NA	0.299		1163	ENSMUSG00000026927.18
1928	ENSMUSG00000013236.18	Ptprs	chr17	-	56728832	56728844	56728239	56728352	56729128	56729286	1928	106,79,109	0,1,0	124100136	0,0,0	161	149	1	1	1.0,0.987,1.0	1.0,1.0,1.0	-0.004		2921	ENSMUSG00000037032.17	Apbb1	chr7	-	105216460	105216691	105216460	105216546	105216634	105216691	2921	0,3,0	18,18,13	0,2,0	11,18,20	237	149	0.957023	1	0.0,0.095,0.0	0.0,0.065,0.0	0.01		1165	ENSMUSG00000026927.18
1930	ENSMUSG00000013236.18	Ptprs	chr17	-	56733386	56733504	56731879	56731977	56735851	56736282	1930	4,1,9	0,0,0	3,3,1	1,0,0	267	149	1	1	1.0,1.0,1.0	0.626,1.0,1.0	0.125		2926	ENSMUSG00000021866.16	Anxa11	chr14	+	25872935	25874455	25872935	25873322	25874367	25874455	2926	0,4,0	2,2,0	0,0,0	0,3,6	1194	149	1	1	0.0,0.2,NA	NA,0.0,0.0	0.1		1171	ENSMUSG00000025602.14
1931	ENSMUSG00000013236.18	Ptprs	chr17	-	56734790	56734817	56733386	56733504	56734938	56735132	1931	1,3,2	139144151	8,2,3	189198197	176	149	0.294791	1	0.006,0.017,0.011	0.035,0.008,0.013	-0.007		2927	ENSMUSG00000021866.16	Anxa11	chr14	+	25874633	25875208	25874633	25874728	25875094	25875208	2927	2,0,1	2,1,0	0,1,0	0,1,0	515	149	1	1	0.224,0.0,1.0	NA,0.224,NA	0.184		1172	ENSMUSG00000026924.18
1932	ENSMUSG00000013236.18	Ptprs	chr17	-	56734938	56735132	56733386	56733504	56735851	56735966	1932	168177197	0,0,0	244242238	0,1,0	343	149	1	1	1.0,1.0,1.0	1.0,0.991,1.0	0.003		2929	ENSMUSG00000020116.8	Pno1	chr11	-	17159076	17159394	17159076	17159137	17159310	17159394	2929	1,1,4	63,38,74	0,5,3	59,65,75	322	149	0.658166	1	0.007,0.012,0.024	0.0,0.034,0.018	-0.003		1179	ENSMUSG00000097277.8
1933	ENSMUSG00000013236.18	Ptprs	chr17	-	56735851	56736157	56731879	56731977	56741452	56741597	1933	172141168	11,8,17	245194203	13,22,12	455	149	0.975572	1	0.837,0.852,0.764	0.861,0.743,0.847	0.001		2935	ENSMUSG00000030815.12	Phkg2	chr7	+	127176706	127177201	127176706	127176818	127177146	127177201	2935	12,9,11	0,0,0	25,26,13	0,1,0	477	149	1	1	1.0,1.0,1.0	1.0,0.89,1.0	0.037		1190	ENSMUSG00000051154.12
1934	ENSMUSG00000013236.18	Ptprs	chr17	-	56736098	56736157	56731879	56731977	56741452	56741597	1934	15,18,30	11,8,17	22,20,25	13,22,12	208	149	0.546496	1	0.494,0.617,0.558	0.548,0.394,0.599	0.043		2936	ENSMUSG00000030815.12	Phkg2	chr7	+	127176706	127177201	127176706	127176860	127177146	127177201	2936	12,9,11	0,0,0	25,23,13	0,3,0	435	149	0.582703	1	1.0,1.0,1.0	1.0,0.724,1.0	0.092		1192	ENSMUSG00000026107.12
1936	ENSMUSG00000013236.18	Ptprs	chr17	-	56741452	56741597	56735851	56736157	56741880	56741982	1936	105,71,117	0,0,0	92,69,93	0,0,1	294	149	1	1	1.0,1.0,1.0	1.0,1.0,0.979	0.007		2938	ENSMUSG00000030751.19	Psma1	chr7	-	113873260	113873695	113873260	113873362	113873650	113873695	2938	3,7,11	127127210	3,5,11	113178150	437	149	0.843353	1	0.008,0.018,0.018	0.009,0.009,0.024	0.001		1201	ENSMUSG00000026279.15
1937	ENSMUSG00000013236.18	Ptprs	chr17	-	56741880	56742014	56735851	56736157	56742609	56742985	1937	30,37,59	0,1,0	47,48,40	0,2,1	283	149	0.602226	1	1.0,0.951,1.0	1.0,0.927,0.955	0.023		2939	ENSMUSG00000014850.16	Msh3	chr13	-	92478753	92481609	92478753	92478920	92481463	92481609	2939	65,40,39	14,6,18	49,65,44	21,14,7	2692	149	0.992471	1	0.204,0.27,0.107	0.114,0.204,0.258	0.002		1205	ENSMUSG00000026730.13
1938	ENSMUSG00000024201.13	Kdm4b	chr17	+	56651333	56651442	56633061	56633229	56658632	56658797	1938	8,6,7	42,41,42	11,6,16	60,49,59	258	149	0.544648	1	0.099,0.078,0.088	0.096,0.066,0.135	-0.011		2943	ENSMUSG00000030929.18	Eri2	chr7	-	119385961	119386708	119385961	119386050	119386626	119386708	2943	5,5,5	1,3,4	6,15,10	6,7,7	725	149	0.884892	1	0.507,0.255,0.204	0.17,0.306,0.227	0.088		1214	ENSMUSG00000021611.10
1939	ENSMUSG00000024201.13	Kdm4b	chr17	+	56696258	56696342	56693082	56693279	56696484	56696672	1939	8,4,11	3,0,0	20,16,19	0,0,0	233	149	0.463493	1	0.63,1.0,1.0	1.0,1.0,1.0	-0.123		2945	ENSMUSG00000023505.14	Cdca3	chr6	+	124808324	124809402	124808324	124808451	124809108	124809402	2945	46,45,30	41,25,58	63,47,25	36,43,61	806	149	0.859312	1	0.172,0.25,0.087	0.244,0.168,0.07	0.009		1215	ENSMUSG00000040782.13
1940	ENSMUSG00000001229.10	Dpp9	chr17	-	56496761	56496880	56496322	56496465	56496989	56497142	1940	1,3,3	26,17,30	6,0,2	12,14,28	268	149	0.79046	1	0.021,0.089,0.053	0.218,0.0,0.038	-0.031		2947	ENSMUSG00000030870.13	Ubfd1	chr7	+	121666886	121668212	121666886	121667216	121668003	121668212	2947	19,11,20	46,72,86	21,15,13	60,75,93	936	149	0.596243	1	0.062,0.024,0.036	0.053,0.031,0.022	0.005		1218	ENSMUSG00000039515.12
1941	ENSMUSG00000001229.10	Dpp9	chr17	-	56501415	56501551	56498013	56498159	56501907	56502060	1941	61,56,80	0,1,0	57,87,61	0,0,0	285	149	1	1	1.0,0.967,1.0	1.0,1.0,1.0	-0.011		2949	ENSMUSG00000053964.18	Lgals4	chr7	+	28540005	28540377	28540005	28540035	28540288	28540377	2949	1,0,0	0,0,0	0,1,0	1,0,0	402	149	1	1	1.0,NA,NA	0.0,1.0,NA	0.5		1219	ENSMUSG00000027222.15
1942	ENSMUSG00000001229.10	Dpp9	chr17	-	56503087	56503167	56501907	56502060	56505971	56506134	1942	29,21,31	0,0,0	26,23,29	0,1,0	229	149	1	1	1.0,1.0,1.0	1.0,0.937,1.0	0.021		2952	ENSMUSG00000059772.13	Slx1b	chr7	-	126291099	126291831	126291099	126291227	126291492	126291831	2952	3,5,3	7,1,4	4,1,4	1,0,7	414	149	0.767866	1	0.134,0.643,0.213	0.59,1.0,0.171	-0.257		1220	ENSMUSG00000026280.18
1943	ENSMUSG00000001229.10	Dpp9	chr17	-	56509840	56509902	56507582	56507683	56511171	56511300	1943	21,10,45	0,0,0	17,25,40	0,1,0	211	149	1	1	1.0,1.0,1.0	1.0,0.946,1.0	0.018		2956	ENSMUSG00000042606.10	Hirip3	chr7	+	126461771	126462098	126461771	126461892	126461989	126462098	2956	33,39,33	28,47,46	38,40,44	48,45,42	246	149	0.850196	1	0.417,0.334,0.303	0.324,0.35,0.388	-0.003		1223	ENSMUSG00000027472.15
1944	ENSMUSG00000002835.10	Chaf1a	chr17	+	56351061	56351112	56347438	56347551	56353822	56354634	1944	94,75,117	0,0,0	48100119	0,2,0	200	149	1	1	1.0,1.0,1.0	1.0,0.974,1.0	0.009		2958	ENSMUSG00000030805.15	Stx4a	chr7	+	127445191	127445448	127445191	127445300	127445371	127445448	2958	2,0,0	8,3,9	0,0,0	18,11,21	220	149	1	1	0.145,0.0,0.0	0.0,0.0,0.0	0.048		1225	ENSMUSG00000021546.19
1945	ENSMUSG00000002835.10	Chaf1a	chr17	+	56353822	56354634	56347438	56347551	56364717	56364920	1945	217148234	3,0,0	144202248	0,0,0	961	149	1	1	0.918,1.0,1.0	1.0,1.0,1.0	-0.027		2959	ENSMUSG00000030800.11	Prss8	chr7	-	127528969	127529276	127528969	127529085	127529228	127529276	2959	1,4,4	1,0,0	1,5,6	0,0,0	292	149	1	1	0.338,1.0,1.0	1.0,1.0,1.0	-0.221		1227	ENSMUSG00000005907.15
1946	ENSMUSG00000002835.10	Chaf1a	chr17	+	56353822	56354634	56351061	56351112	56363420	56363477	1946	316237367	1,0,1	203318375	2,0,1	961	149	1	1	0.98,1.0,0.983	0.94,1.0,0.983	0.013		2972	ENSMUSG00000001034.18	Mapk7	chr11	-	61380674	61381330	61380674	61380754	61381171	61381330	2972	104100126	0,0,0	103131114	0,1,0	566	149	1	1	1.0,1.0,1.0	1.0,0.972,1.0	0.009		1229	ENSMUSG00000089872.11
1947	ENSMUSG00000002835.10	Chaf1a	chr17	+	56363420	56363477	56353813	56354634	56364717	56364920	1947	26,22,31	0,0,0	16,29,23	1,0,0	206	149	1	1	1.0,1.0,1.0	0.92,1.0,1.0	0.027		2976	ENSMUSG00000001034.18	Mapk7	chr11	-	61383729	61385092	61383729	61383887	61384472	61385092	2976	37,15,26	0,0,0	41,43,22	0,0,1	734	149	1	1	1.0,1.0,1.0	1.0,1.0,0.817	0.061		1230	ENSMUSG00000024097.12
1948	ENSMUSG00000002835.10	Chaf1a	chr17	+	56369084	56369311	56366257	56366326	56369550	56369578	1948	102,88,127	0,0,0	98135141	0,1,0	376	149	1	1	1.0,1.0,1.0	1.0,0.982,1.0	0.006		2985	ENSMUSG00000022946.11	Dop1b	chr16	+	93536041	93537562	93536041	93536223	93536856	93537562	2985	0,0,0	0,1,1	0,2,0	2,2,3	782	149	1	1	NA,0.0,0.0	0.0,0.16,0.0	-0.053		1231	ENSMUSG00000024097.12
1949	ENSMUSG00000038781.8	Stap2	chr17	-	56306742	56307015	56304777	56304951	56307086	56307156	1949	0,2,0	0,1,1	0,4,1	4,0,2	422	149	1	1	NA,0.414,0.0	0.0,1.0,0.15	-0.176		2987	ENSMUSG00000015697.15	Setdb1	chr3	-	95244459	95246343	95244459	95244576	95245656	95246343	2987	84,45,37	15,16,22	52,79,52	18,15,18	1229	149	0.574193	1	0.404,0.254,0.169	0.259,0.39,0.259	-0.027		1232	ENSMUSG00000024097.12
1950	ENSMUSG00000011589.10	Fsd1	chr17	+	56300842	56300941	56298166	56298376	56302356	56302516	1950	3,4,21	0,0,0	12,13,15	0,0,1	248	149	1	1	1.0,1.0,1.0	1.0,1.0,0.9	0.033		2988	ENSMUSG00000025473.17	Adam8	chr7	-	139564641	139565343	139564641	139564756	139565249	139565343	2988	1,2,2	0,2,1	0,0,1	3,0,0	642	149	1	1	1.0,0.188,0.317	0.0,NA,1.0	0.002		1234	ENSMUSG00000056763.17
1951	ENSMUSG00000011589.10	Fsd1	chr17	+	56303420	56303509	56303071	56303323	56303641	56303881	1951	12,11,10	0,0,1	17,24,29	0,0,0	238	149	1	1	1.0,1.0,0.862	1.0,1.0,1.0	-0.046		2989	ENSMUSG00000025473.17	Adam8	chr7	-	139566215	139566721	139566215	139566381	139566645	139566721	2989	2,0,1	0,0,0	0,1,0	1,1,0	413	149	1	1	1.0,NA,1.0	0.0,0.265,NA	0.867		1235	ENSMUSG00000056763.17
1955	ENSMUSG00000057835.8	Zfp119a	chr17	-	56175302	56175363	56171891	56173650	56175558	56175685	1955	6,3,1	0,0,1	3,0,0	0,0,0	210	149	1	1	1.0,1.0,0.415	1.0,NA,NA	-0.195		2991	ENSMUSG00000025473.17	Adam8	chr7	-	139567091	139567650	139567091	139567181	139567472	139567650	2991	0,1,0	0,0,0	0,1,1	0,0,1	440	149	1	1	NA,1.0,NA	NA,1.0,0.253	0.373		1236	ENSMUSG00000056763.17
1956	ENSMUSG00000024174.10	Pot1b	chr17	-	56002026	56002317	55999721	55999877	56005456	56005587	1956	14,18,16	1,1,0	15,16,24	0,0,0	440	149	1	1	0.826,0.859,1.0	1.0,1.0,1.0	-0.105		3000	ENSMUSG00000025485.14	Ric8a	chr7	+	140437894	140438485	140437894	140438185	140438279	140438485	3000	13,10,20	0,0,0	17,24,24	2,0,0	243	149	1	1	1.0,1.0,1.0	0.839,1.0,1.0	0.054		1237	ENSMUSG00000025816.16
1957	ENSMUSG00000024174.10	Pot1b	chr17	-	56005456	56005587	55999721	55999877	56006991	56007106	1957	12,13,17	0,2,0	8,15,13	0,0,0	280	149	1	1	1.0,0.776,1.0	1.0,1.0,1.0	-0.075		3003	ENSMUSG00000025494.9	Sigirr	chr7	-	140671087	140671905	140671087	140671414	140671715	140671905	3003	0,0,4	2,0,0	1,2,0	0,0,0	450	149	1	1	0.0,NA,1.0	1.0,1.0,NA	-0.5		1240	ENSMUSG00000025465.14
1958	ENSMUSG00000024174.10	Pot1b	chr17	-	56015997	56016086	56013105	56013152	56017838	56017906	1958	3,8,5	11,3,9	8,8,7	9,2,8	238	149	0.323063	1	0.146,0.625,0.258	0.358,0.715,0.354	-0.133		3011	ENSMUSG00000025504.15	Eps8l2	chr7	+	140921805	140922023	140921805	140921887	140921967	140922023	3011	0,0,0	0,0,1	3,0,0	0,2,0	229	149	1	1	NA,NA,0.0	1.0,0.0,NA	-0.5		1241	ENSMUSG00000026883.18
1961	ENSMUSG00000007670.11	Khsrp	chr17	-	57330826	57330936	57330504	57330593	57331010	57331171	1961	350272434	2,0,1	361427409	1,0,0	259	149	1	1	0.99,1.0,0.996	0.995,1.0,1.0	-0.003		3012	ENSMUSG00000025504.15	Eps8l2	chr7	+	140937154	140937604	140937154	140937229	140937455	140937604	3012	0,0,0	2,0,0	1,3,0	1,0,3	375	149	1	1	0.0,NA,NA	0.284,1.0,0.0	-0.428		1243	ENSMUSG00000059495.15
1962	ENSMUSG00000007670.11	Khsrp	chr17	-	57331979	57332078	57331788	57331891	57332307	57332406	1962	201182221	0,1,0	208225286	0,0,0	248	149	1	1	1.0,0.991,1.0	1.0,1.0,1.0	-0.003		3019	ENSMUSG00000025507.14	Pidd1	chr7	-	141019915	141020279	141019915	141020066	141020143	141020279	3019	0,4,7	1,5,5	3,4,5	11,2,6	226	149	0.821949	1	0.0,0.345,0.48	0.152,0.569,0.355	-0.084		1256	ENSMUSG00000035325.17
1963	ENSMUSG00000007670.11	Khsrp	chr17	-	57334816	57334856	57334048	57334098	57334955	57334994	1963	114112209	0,1,0	136139176	0,2,0	189	149	1	1	1.0,0.989,1.0	1.0,0.982,1.0	0.002		3020	ENSMUSG00000025507.14	Pidd1	chr7	-	141021085	141021442	141021085	141021229	141021387	141021442	3020	3,0,2	1,1,0	6,2,4	0,0,0	307	149	1	1	0.593,0.0,1.0	1.0,1.0,1.0	-0.469		1259	ENSMUSG00000043019.13
1964	ENSMUSG00000023940.15	Sgo1	chr17	-	53995017	53995148	53994587	53994886	53996238	53996314	1964	10,19,21	1,0,0	16,28,30	0,0,0	280	149	1	1	0.842,1.0,1.0	1.0,1.0,1.0	-0.053		3021	ENSMUSG00000025507.14	Pidd1	chr7	-	141021085	141021442	141021085	141021287	141021387	141021442	3021	3,0,2	0,0,5	6,2,4	4,7,3	249	149	1	1	1.0,NA,0.193	0.473,0.146,0.444	0.242		1264	ENSMUSG00000029146.15
1965	ENSMUSG00000017831.9	Rab5a	chr17	+	53790848	53791103	53786261	53786636	53804554	53804706	1965	83,47,96	0,0,3	78,57,92	0,2,0	404	149	0.632264	1	1.0,1.0,0.922	1.0,0.913,1.0	0.003		3022	ENSMUSG00000025507.14	Pidd1	chr7	-	141021524	141022477	141021524	141021697	141022063	141022477	3022	16,18,19	0,0,0	23,16,21	0,0,2	515	149	1	1	1.0,1.0,1.0	1.0,1.0,0.752	0.083		1268	ENSMUSG00000040728.16
1966	ENSMUSG00000035580.11	Kcnh8	chr17	+	53141569	53141727	53110360	53110601	53146082	53146290	1966	0,1,0	0,0,3	2,3,0	0,0,0	307	149	1	1	NA,1.0,0.0	1.0,1.0,NA	-0.5		3023	ENSMUSG00000025507.14	Pidd1	chr7	-	141021524	141022477	141021524	141021734	141022063	141022477	3023	15,16,19	3,2,15	19,15,21	5,8,2	478	149	0.718506	1	0.609,0.714,0.283	0.542,0.369,0.766	-0.024		1269	ENSMUSG00000070420.5
1972	ENSMUSG00000040771.15	Oard1	chr17	+	48721253	48721312	48718291	48718436	48722248	48722361	1972	36,31,33	0,1,2	54,47,36	2,3,0	208	149	0.448502	1	1.0,0.957,0.922	0.951,0.918,1.0	0.003		3024	ENSMUSG00000025507.14	Pidd1	chr7	-	141021524	141022477	141021524	141021773	141022063	141022477	3024	13,15,17	0,0,0	17,14,17	0,0,1	439	149	1	1	1.0,1.0,1.0	1.0,1.0,0.852	0.049		1270	ENSMUSG00000057666.19
1976	ENSMUSG00000023991.17	Foxp4	chr17	-	48186444	48186613	48186279	48186356	48186764	48186848	1976	207173208	0,0,0	240235205	0,1,0	318	149	1	1	1.0,1.0,1.0	1.0,0.991,1.0	0.003		3025	ENSMUSG00000025507.14	Pidd1	chr7	-	141022063	141023269	141022063	141022477	141022880	141023269	3025	1,4,4	3,1,4	4,2,5	5,6,3	552	149	0.819818	1	0.083,0.519,0.213	0.178,0.083,0.31	0.081		1274	ENSMUSG00000062963.11
1977	ENSMUSG00000023991.17	Foxp4	chr17	-	48186444	48186649	48186279	48186356	48186764	48186848	1977	105,77,107	0,0,0	120,95,86	0,1,0	354	149	1	1	1.0,1.0,1.0	1.0,0.976,1.0	0.008		3028	ENSMUSG00000037974.17	Muc5ac	chr7	+	141360684	141364548	141360684	141361932	141364041	141364548	3028	0,4,0	0,1,0	0,7,0	0,0,0	2258	149	1	1	NA,0.209,NA	NA,1.0,NA	-0.791		1275	ENSMUSG00000062729.13
1978	ENSMUSG00000023991.17	Foxp4	chr17	-	48186764	48186848	48186444	48186613	48188065	48188153	1978	145138161	0,0,1	174199172	0,0,0	233	149	1	1	1.0,1.0,0.99	1.0,1.0,1.0	-0.003		3032	ENSMUSG00000000031.17	H19	chr7	-	142129939	142130267	142129939	142130067	142130145	142130267	3032	7,4,8	298243378	7,6,6	499433501	227	149	0.736857	1	0.015,0.011,0.014	0.009,0.009,0.008	0.005		1279	ENSMUSG00000029290.13
1979	ENSMUSG00000023991.17	Foxp4	chr17	-	48215220	48215459	48198817	48199145	48235130	48235325	1979	243175245	0,1,0	221182184	0,0,0	388	149	1	1	1.0,0.985,1.0	1.0,1.0,1.0	-0.005		3035	ENSMUSG00000034917.9	Tjp3	chr10	-	81115028	81115405	81115028	81115185	81115338	81115405	3035	0,3,0	0,2,9	0,4,2	6,2,2	302	149	1	1	NA,0.425,0.0	0.0,0.497,0.33	-0.063		1285	ENSMUSG00000060568.15
1980	ENSMUSG00000032717.15	Mdfi	chr17	-	48131738	48131966	48126252	48127089	48143868	48143955	1980	23,25,14	0,0,2	24,14,19	0,0,0	377	149	1	1	1.0,1.0,0.735	1.0,1.0,1.0	-0.088		3036	ENSMUSG00000034917.9	Tjp3	chr10	-	81119329	81119573	81119329	81119439	81119516	81119573	3036	0,0,0	2,0,6	1,4,0	4,3,7	226	149	1	1	0.0,NA,0.0	0.142,0.468,0.0	-0.203		1289	ENSMUSG00000055214.16
1982	ENSMUSG00000032717.15	Mdfi	chr17	-	48141515	48141619	48135472	48135652	48143868	48143955	1982	2,0,0	40,37,50	4,0,0	48,54,36	253	149	1	1	0.029,0.0,0.0	0.047,0.0,0.0	-0.006		3043	ENSMUSG00000011832.17	Evi5l	chr8	+	4255571	4255970	4255571	4255727	4255823	4255970	3043	0,1,1	0,1,0	4,0,0	0,1,0	245	149	1	1	NA,0.378,1.0	1.0,0.0,NA	0.189		1293	ENSMUSG00000036632.10
1984	ENSMUSG00000090115.8	Usp49	chr17	+	47985640	47985845	47982968	47984343	47989768	47989877	1984	24,27,38	0,0,1	16,21,19	0,0,0	354	149	1	1	1.0,1.0,0.941	1.0,1.0,1.0	-0.02		3052	ENSMUSG00000022322.9	Shcbp1	chr8	-	4817906	4818311	4817906	4818022	4818143	4818311	3052	0,1,1	6,17,14	0,0,1	13,30,19	270	149	1	1	0.0,0.031,0.038	0.0,0.0,0.028	0.014		1294	ENSMUSG00000026577.14
1985	ENSMUSG00000090115.8	Usp49	chr17	+	47985640	47985845	47982968	47984343	47990588	47990643	1985	25,25,29	0,0,0	15,21,18	0,0,1	354	149	1	1	1.0,1.0,1.0	1.0,1.0,0.883	0.039		3055	ENSMUSG00000027425.19	Kat14	chr2	+	144248542	144249596	144248542	144248631	144249231	144249596	3055	123118194	0,0,2	131161207	0,0,0	749	149	1	1	1.0,1.0,0.951	1.0,1.0,1.0	-0.016		1297	ENSMUSG00000022098.11
1986	ENSMUSG00000090115.8	Usp49	chr17	+	47989768	47989877	47984225	47984343	47990588	47990643	1986	6,3,12	0,0,0	5,8,4	0,0,1	258	149	1	1	1.0,1.0,1.0	1.0,1.0,0.698	0.101		3059	ENSMUSG00000038482.12	Tfdp1	chr8	+	13420480	13421022	13420480	13420646	13420878	13421022	3059	4,6,6	118,80,134	3,7,6	90117147	381	149	0.886709	1	0.013,0.028,0.017	0.013,0.023,0.016	0.002		1298	ENSMUSG00000038705.14
1987	ENSMUSG00000090115.8	Usp49	chr17	+	47989768	47989877	47985640	47985845	47990588	47990643	1987	7,6,20	2,1,0	6,8,5	0,0,0	258	149	0.682449	1	0.669,0.776,1.0	1.0,1.0,1.0	-0.185		3061	ENSMUSG00000026672.12	Optn	chr2	-	5025452	5026292	5025452	5026039	5026133	5026292	3061	2,1,0	1,0,0	0,0,4	0,0,2	243	149	1	1	0.551,1.0,NA	NA,NA,0.551	0.225		1300	ENSMUSG00000030016.15
1988	ENSMUSG00000092558.4	Med20	chr17	+	47923887	47924042	47922506	47922617	47929733	47929987	1988	10,21,27	0,0,0	24,28,45	0,2,0	304	149	1	1	1.0,1.0,1.0	1.0,0.873,1.0	0.042		3065	ENSMUSG00000036053.18	Fmnl2	chr2	+	52998263	52998470	52998263	52998298	52998400	52998470	3065	24,15,15	0,0,0	19,14,20	1,0,0	251	149	1	1	1.0,1.0,1.0	0.919,1.0,1.0	0.027		1301	ENSMUSG00000026694.20
1989	ENSMUSG00000092558.4	Med20	chr17	+	47929733	47929987	47923887	47924042	47933809	47935343	1989	37,31,47	0,0,2	31,43,58	0,0,1	403	149	1	1	1.0,1.0,0.897	1.0,1.0,0.955	-0.019		3068	ENSMUSG00000031537.16	Ikbkb	chr8	-	23158960	23161761	23158960	23159112	23161646	23161761	3068	55,37,38	0,0,2	44,69,46	0,0,0	2683	149	0.788651	1	1.0,1.0,0.513	1.0,1.0,1.0	-0.162		1304	ENSMUSG00000015942.10
1992	ENSMUSG00000034165.17	Ccnd3	chr17	+	47904533	47904777	47889633	47889717	47905658	47905874	1992	65,55,139	0,0,0	95,96,107	0,0,2	393	149	1	1	1.0,1.0,1.0	1.0,1.0,0.953	0.016		3070	ENSMUSG00000031543.19	Ank1	chr8	+	23622112	23622650	23622112	23622499	23622577	23622650	3070	2,2,5	0,1,0	0,2,1	0,0,0	227	149	1	1	1.0,0.568,1.0	NA,1.0,1.0	-0.144		1309	ENSMUSG00000052395.18
1993	ENSMUSG00000034165.17	Ccnd3	chr17	+	47904569	47904777	47889633	47889717	47905658	47905874	1993	58,53,127	0,0,0	86,92,92	0,0,2	357	149	1	1	1.0,1.0,1.0	1.0,1.0,0.95	0.017		3072	ENSMUSG00000031310.17	Zmym3	chrX	-	100459366	100460067	100459366	100459544	100459772	100460067	3072	2,0,0	14,12,26	2,1,0	12,12,7	377	149	0.759541	1	0.053,0.0,0.0	0.062,0.032,0.0	-0.014		1311	ENSMUSG00000030269.15
1994	ENSMUSG00000034165.17	Ccnd3	chr17	+	47904578	47904777	47889633	47889717	47905658	47905874	1994	56,52,121	0,0,0	85,78,80	0,0,2	348	149	1	1	1.0,1.0,1.0	1.0,1.0,0.945	0.018		3073	ENSMUSG00000034171.14	Faah	chr4	-	115856695	115857285	115856695	115856804	115857245	115857285	3073	0,1,0	2,0,4	0,0,0	1,2,0	590	149	1	1	0.0,1.0,0.0	0.0,0.0,NA	0.333		1315	ENSMUSG00000060519.12
1997	ENSMUSG00000023977.16	Ubr2	chr17	-	47291245	47291344	47286852	47287016	47291414	47291513	1997	15,3,6	8,6,4	8,8,10	7,2,3	248	149	0.259179	1	0.53,0.231,0.474	0.407,0.706,0.667	-0.182		3074	ENSMUSG00000034171.14	Faah	chr4	-	115857245	115858024	115857245	115857285	115857983	115858024	3074	1,1,3	2,0,1	0,0,3	1,0,0	847	149	1	1	0.081,1.0,0.345	0.0,NA,1.0	-0.025		1318	ENSMUSG00000041912.13
1998	ENSMUSG00000023977.16	Ubr2	chr17	-	47291245	47291344	47286852	47287016	47292279	47292368	1998	26,9,17	0,1,0	28,24,13	0,0,0	248	149	1	1	1.0,0.844,1.0	1.0,1.0,1.0	-0.052		3086	ENSMUSG00000047090.14	Tmem198b	chr10	-	128637219	128638386	128637219	128637380	128638273	128638386	3086	14,17,23	0,0,1	21,21,17	0,1,1	1042	149	1	1	1.0,1.0,0.767	1.0,0.75,0.709	0.103		1319	ENSMUSG00000041912.13
1999	ENSMUSG00000023977.16	Ubr2	chr17	-	47291414	47291513	47286852	47287016	47292279	47292368	1999	9,11,6	0,1,0	23,5,8	0,0,0	248	149	1	1	1.0,0.869,1.0	1.0,1.0,1.0	-0.044		3091	ENSMUSG00000071103.11	1700029J07Rik	chr8	-	46426540	46428289	46426540	46426717	46428115	46428289	3091	3,11,5	0,1,0	20,14,3	0,0,0	1547	149	1	1	1.0,0.514,1.0	1.0,1.0,1.0	-0.162		1322	ENSMUSG00000030271.15
2000	ENSMUSG00000023977.16	Ubr2	chr17	-	47291414	47291513	47291245	47291344	47292279	47292368	2000	1,5,2	11,6,11	16,3,6	20,16,4	248	149	0.0955638	1	0.052,0.334,0.098	0.325,0.101,0.474	-0.139		3094	ENSMUSG00000018796.14	Acsl1	chr8	+	46964396	46966427	46964396	46964498	46966327	46966427	3094	5,3,0	1,1,4	1,0,2	4,0,5	1978	149	1	1	0.274,0.184,0.0	0.018,NA,0.029	0.129		1328	ENSMUSG00000026409.15
2001	ENSMUSG00000023977.16	Ubr2	chr17	-	47292279	47292368	47291414	47291513	47293191	47293299	2001	11,8,2	0,0,0	19,5,11	0,0,1	238	149	1	1	1.0,1.0,1.0	1.0,1.0,0.873	0.042		3096	ENSMUSG00000038173.16	Enpp6	chr8	+	47518406	47519088	47518406	47518548	47518908	47519088	3096	0,1,0	0,0,1	0,0,0	0,2,2	509	149	1	1	NA,1.0,0.0	NA,0.0,0.0	0.5		1331	ENSMUSG00000026095.16
2002	ENSMUSG00000023977.16	Ubr2	chr17	-	47303916	47303995	47301917	47302031	47311511	47311771	2002	30,15,22	1,0,0	34,46,44	0,0,0	228	149	1	1	0.951,1.0,1.0	1.0,1.0,1.0	-0.016		3099	ENSMUSG00000007589.10	Tinf2	chr14	-	55917471	55918164	55917471	55917913	55918067	55918164	3099	20,23,8	14,19,24	14,21,15	18,25,24	303	149	0.688685	1	0.413,0.373,0.141	0.277,0.292,0.235	0.041		1332	ENSMUSG00000026867.20
2003	ENSMUSG00000063888.8	Rpl7l1	chr17	-	47092708	47092817	47091316	47091477	47093544	47093582	2003	52,47,87	0,0,0	38,54,87	1,1,0	258	149	1	1	1.0,1.0,1.0	0.956,0.969,1.0	0.025		3107	ENSMUSG00000024565.11	Sall3	chr18	-	81014395	81017844	81014395	81014736	81014952	81017844	3107	2,3,4	3,1,8	2,7,2	3,4,9	365	149	0.904249	1	0.214,0.55,0.17	0.214,0.417,0.083	0.073		1339	ENSMUSG00000026176.14
2004	ENSMUSG00000023973.14	Cnpy3	chr17	-	47054111	47054208	47048652	47048775	47058346	47058470	2004	22,14,28	0,0,1	34,26,30	2,0,0	246	149	1	1	1.0,1.0,0.944	0.911,1.0,1.0	0.011		3108	ENSMUSG00000045128.10	Rpl18a	chr8	-	71348022	71348353	71348022	71348151	71348243	71348353	3108	27,29,40	376229964747	20,27,28	503756295856	241	149	1	1	0.004,0.006,0.005	0.002,0.003,0.003	0.002		1341	ENSMUSG00000044783.17
2005	ENSMUSG00000023973.14	Cnpy3	chr17	-	47058346	47058470	47048652	47048775	47062898	47063121	2005	4,6,12	0,0,0	12,20,9	0,2,0	273	149	1	1	1.0,1.0,1.0	1.0,0.845,1.0	0.052		3113	ENSMUSG00000031864.17	Ints10	chr8	+	69249368	69251453	69249368	69249472	69250410	69251453	3113	51,27,48	9,5,8	58,57,40	12,7,4	1087	149	0.584631	1	0.437,0.425,0.451	0.399,0.527,0.578	-0.064		1342	ENSMUSG00000044783.17
2006	ENSMUSG00000002763.17	Pex6	chr17	+	47026287	47026418	47025386	47025470	47031253	47031356	2006	0,0,1	17,29,15	0,0,0	34,29,31	280	149	1	1	0.0,0.0,0.034	0.0,0.0,0.0	0.011		3116	ENSMUSG00000031858.17	Mau2	chr8	-	70475269	70476347	70475269	70475319	70476263	70476347	3116	21,24,24	5,6,25	38,19,29	8,14,13	1093	149	0.76831	1	0.364,0.353,0.116	0.393,0.156,0.233	0.017		1343	ENSMUSG00000075302.11
2008	ENSMUSG00000063576.13	Klhdc3	chr17	-	46989206	46989419	46988857	46989034	46991627	46991840	2008	100,89,134	0,0,0	131103144	0,0,3	362	149	1	1	1.0,1.0,1.0	1.0,1.0,0.952	0.016		3117	ENSMUSG00000031858.17	Mau2	chr8	-	70481268	70481885	70481268	70481424	70481857	70481885	3117	9,8,9	7,15,19	6,22,5	11,13,20	582	149	0.833654	1	0.248,0.12,0.108	0.123,0.302,0.06	-0.003		1346	ENSMUSG00000018196.19
2009	ENSMUSG00000063576.13	Klhdc3	chr17	-	46989967	46990120	46988857	46989034	46991627	46991715	2009	7,16,19	0,0,0	16,12,14	0,0,3	302	149	0.615011	1	1.0,1.0,1.0	1.0,1.0,0.697	0.101		3120	ENSMUSG00000036054.16	Sugp2	chr8	+	70713118	70713967	70713118	70713239	70713880	70713967	3120	40,32,25	8,2,9	40,29,21	2,5,10	790	149	0.945649	1	0.485,0.751,0.344	0.79,0.522,0.284	-0.005		1354	ENSMUSG00000037376.15
2010	ENSMUSG00000063576.13	Klhdc3	chr17	-	46989967	46990120	46989206	46989419	46991627	46991715	2010	31,39,59	1,4,4	39,53,53	5,5,1	302	149	0.930145	1	0.939,0.828,0.879	0.794,0.839,0.963	0.017		3121	ENSMUSG00000003575.14	Crtc1	chr8	-	70844510	70844813	70844510	70844561	70844669	70844813	3121	10,12,24	2,0,0	18,14,13	0,0,3	257	149	0.750912	1	0.744,1.0,1.0	1.0,1.0,0.715	0.01		1357	ENSMUSG00000041396.14
2011	ENSMUSG00000023971.10	Rrp36	chr17	-	46983261	46983366	46981036	46981111	46983450	46983517	2011	17,19,34	2,0,0	19,28,46	0,0,0	254	149	1	1	0.833,1.0,1.0	1.0,1.0,1.0	-0.056		3122	ENSMUSG00000003575.14	Crtc1	chr8	-	70845571	70850604	70845571	70845705	70850395	70850604	3122	41,46,32	2,4,3	61,48,34	0,5,6	4839	149	0.669394	1	0.387,0.262,0.247	1.0,0.228,0.149	-0.16		1358	ENSMUSG00000037552.18
2012	ENSMUSG00000002767.14	Mrpl2	chr17	+	46958315	46958484	46957154	46957324	46959162	46959304	2012	64,62,89	0,0,0	118115109	0,0,2	318	149	1	1	1.0,1.0,1.0	1.0,1.0,0.962	0.013		3123	ENSMUSG00000048856.10	Slc25a47	chr12	+	108821219	108822741	108821219	108821544	108821864	108822741	3123	5,2,0	0,1,0	0,1,3	0,0,0	469	149	1	1	1.0,0.389,NA	NA,1.0,1.0	-0.305		1359	ENSMUSG00000020451.18
2013	ENSMUSG00000002767.14	Mrpl2	chr17	+	46958321	46958484	46957195	46957324	46959162	46959304	2013	23,15,37	0,0,0	27,47,29	0,0,2	312	149	1	1	1.0,1.0,1.0	1.0,1.0,0.874	0.042		3130	ENSMUSG00000031842.16	Pde4c	chr8	+	71201016	71201682	71201016	71201171	71201559	71201682	3130	0,1,0	0,0,2	1,2,0	0,0,0	537	149	1	1	NA,1.0,0.0	1.0,1.0,NA	-0.5		1364	ENSMUSG00000026977.18
2015	ENSMUSG00000015605.7	Srf	chr17	-	46864485	46864752	46862456	46862718	46866253	46867101	2015	148117154	0,2,0	176150169	0,0,0	416	149	1	1	1.0,0.954,1.0	1.0,1.0,1.0	-0.015		3134	ENSMUSG00000029617.11	Ccz1	chr5	-	143947848	143948347	143947848	143947896	143948269	143948347	3134	9,9,15	20,10,25	13,16,7	28,17,20	522	149	0.87603	1	0.114,0.204,0.146	0.117,0.212,0.091	0.015		1365	ENSMUSG00000029001.16
2016	ENSMUSG00000040327.17	Cul9	chr17	-	46830670	46830857	46822364	46822510	46830937	46831166	2016	1,0,0	0,0,1	5,1,2	0,0,0	336	149	1	1	1.0,NA,0.0	1.0,1.0,1.0	-0.5		3145	ENSMUSG00000034863.10	Ano8	chr8	-	71933079	71934832	71933079	71933886	71934776	71934832	3145	21,22,12	0,0,1	14,22,9	0,0,0	1039	149	1	1	1.0,1.0,0.632	1.0,1.0,1.0	-0.123		1366	ENSMUSG00000029001.16
2019	ENSMUSG00000040658.8	Dnph1	chr17	+	46809350	46809419	46807636	46807898	46809568	46809679	2019	10,10,17	0,0,0	12,18,23	0,0,1	218	149	1	1	1.0,1.0,1.0	1.0,1.0,0.94	0.02		3146	ENSMUSG00000034807.10	Colgalt1	chr8	+	72074407	72075474	72074407	72074540	72075346	72075474	3146	25,15,23	15,19,46	32,24,20	38,22,40	955	149	0.843414	1	0.206,0.11,0.072	0.116,0.145,0.072	0.018		1367	ENSMUSG00000029001.16
2020	ENSMUSG00000015597.18	Zfp318	chr17	+	46709565	46711017	46707587	46708230	46713659	46713759	2020	208200218	0,0,0	259241214	0,1,0	1601	149	1	1	1.0,1.0,1.0	1.0,0.957,1.0	0.014		3152	ENSMUSG00000026211.19	Obsl1	chr1	-	75479556	75480262	75479556	75479859	75480010	75480262	3152	0,0,0	8,8,27	1,0,0	11,13,16	300	149	1	1	0.0,0.0,0.0	0.043,0.0,0.0	-0.014		1368	ENSMUSG00000029001.16
2021	ENSMUSG00000012296.17	Tjap1	chr17	-	46571805	46571835	46571020	46571128	46572061	46572128	2021	1,2,4	6,1,7	3,6,1	12,10,13	179	149	0.570794	1	0.122,0.625,0.322	0.172,0.333,0.06	0.168		3155	ENSMUSG00000003033.16	Ap1m1	chr8	+	73007052	73007477	73007052	73007124	73007318	73007477	3155	8,7,2	62,33,65	5,6,11	56,47,74	343	149	0.595137	1	0.053,0.084,0.013	0.037,0.053,0.061	0		1369	ENSMUSG00000006304.15
2024	ENSMUSG00000012296.17	Tjap1	chr17	-	46582725	46582855	46575808	46575904	46593271	46593365	2024	14,11,16	3,5,7	22,18,27	2,6,4	279	149	0.123033	1	0.714,0.54,0.55	0.855,0.616,0.783	-0.15		3170	ENSMUSG00000031708.18	Tecr	chr8	-	84299656	84299952	84299656	84299772	84299848	84299952	3170	14,16,18	124105175	15,14,26	164153171	225	149	0.838111	1	0.07,0.092,0.064	0.057,0.057,0.091	0.007		1374	ENSMUSG00000049606.17
2025	ENSMUSG00000012296.17	Tjap1	chr17	-	46591341	46591470	46582725	46582855	46593271	46593365	2025	0,0,0	12,7,14	1,0,0	18,18,23	278	149	1	1	0.0,0.0,0.0	0.029,0.0,0.0	-0.01		3171	ENSMUSG00000001909.17	Trmt1	chr8	+	85417145	85417576	85417145	85417201	85417401	85417576	3171	33,12,40	2,0,0	25,28,21	0,1,0	349	149	1	1	0.876,1.0,1.0	1.0,0.923,1.0	-0.016		1375	ENSMUSG00000027206.14
2030	ENSMUSG00000023953.10	Polh	chr17	-	46486076	46486246	46482280	46484022	46492391	46492457	2030	28,18,40	0,0,0	28,37,43	0,2,0	319	149	1	1	1.0,1.0,1.0	1.0,0.896,1.0	0.035		3174	ENSMUSG00000001909.17	Trmt1	chr8	+	85417145	85417576	85417145	85417201	85417439	85417576	3174	33,12,45	16,12,34	26,28,22	19,17,23	387	149	0.685546	1	0.443,0.278,0.338	0.345,0.388,0.269	0.019		1380	ENSMUSG00000025813.15
2031	ENSMUSG00000023953.10	Polh	chr17	-	46492391	46492457	46486076	46486246	46493610	46493734	2031	15,7,17	0,0,0	11,12,15	0,1,0	215	149	1	1	1.0,1.0,1.0	1.0,0.893,1.0	0.036		3178	ENSMUSG00000003808.19	Farsa	chr8	+	85594177	85594547	85594177	85594277	85594378	85594547	3178	11,24,13	23,30,34	11,27,8	20,39,24	250	149	0.962504	1	0.222,0.323,0.186	0.247,0.292,0.166	0.009		1382	ENSMUSG00000027881.15
2032	ENSMUSG00000023953.10	Polh	chr17	-	46505127	46505342	46501532	46501702	46509559	46509694	2032	8,13,18	2,2,0	34,31,30	0,0,2	364	149	0.363273	1	0.621,0.727,1.0	1.0,1.0,0.86	-0.171		3179	ENSMUSG00000003808.19	Farsa	chr8	+	85594177	85594547	85594177	85594277	85594381	85594547	3179	11,24,13	0,0,0	11,27,8	0,1,0	253	149	1	1	1.0,1.0,1.0	1.0,0.941,1.0	0.02		1384	ENSMUSG00000026389.17
2033	ENSMUSG00000023952.14	Gtpbp2	chr17	+	46473959	46474139	46472220	46472252	46474408	46474435	2033	0,1,0	4,14,8	0,0,1	4,4,17	329	149	1	1	0.0,0.031,0.0	0.0,0.0,0.026	0.002		3180	ENSMUSG00000003808.19	Farsa	chr8	+	85594637	85594967	85594637	85594715	85594852	85594967	3180	1,4,2	7,6,18	0,3,4	2,9,11	286	149	0.827497	1	0.069,0.258,0.055	0.0,0.148,0.159	0.025		1389	ENSMUSG00000034021.16
2034	ENSMUSG00000023952.14	Gtpbp2	chr17	+	46474222	46474334	46471974	46472252	46474408	46474431	2034	0,1,0	4,14,8	0,0,0	4,4,17	261	149	1	1	0.0,0.039,0.0	0.0,0.0,0.0	0.013		3182	ENSMUSG00000052566.9	Hook2	chr8	+	85722364	85722566	85722364	85722395	85722467	85722566	3182	5,3,7	0,1,0	8,12,15	0,0,1	221	149	1	1	1.0,0.669,1.0	1.0,1.0,0.91	-0.08		1390	ENSMUSG00000026385.17
2036	ENSMUSG00000023966.9	Rsph9	chr17	-	46452472	46452638	46447667	46447797	46454847	46455142	2036	9,0,1	0,0,0	0,5,1	2,0,0	315	149	1	1	1.0,NA,1.0	0.0,1.0,1.0	0.333		3184	ENSMUSG00000005150.17	Wdr83	chr8	-	85806209	85806854	85806209	85806336	85806417	85806854	3184	0,1,1	9,7,12	0,5,6	3,14,9	230	149	1	1	0.0,0.085,0.051	0.0,0.188,0.302	-0.118		1391	ENSMUSG00000032411.16
2037	ENSMUSG00000023951.19	Vegfa	chr17	-	46331916	46332048	46327918	46329805	46333202	46333274	2037	46,45,54	0,0,0	239130101	1,0,0	281	149	1	1	1.0,1.0,1.0	0.992,1.0,1.0	0.003		3187	ENSMUSG00000005150.17	Wdr83	chr8	-	85806417	85806854	85806417	85806466	85806748	85806854	3187	17,11,8	7,6,12	13,15,12	5,10,18	431	149	0.81606	1	0.456,0.388,0.187	0.473,0.341,0.187	0.01		1392	ENSMUSG00000054920.13
2038	ENSMUSG00000023951.19	Vegfa	chr17	-	46331916	46332048	46327918	46329805	46334990	46335020	2038	59,51,78	13,5,18	318163136	30,36,29	281	149	0.692872	1	0.706,0.844,0.697	0.849,0.706,0.713	-0.007		3188	ENSMUSG00000005142.11	Man2b1	chr8	+	85811983	85813572	85811983	85812177	85813439	85813572	3188	16,14,16	4,12,8	15,36,21	11,16,20	1411	149	0.584983	1	0.297,0.11,0.174	0.126,0.192,0.1	0.054		1394	ENSMUSG00000068922.15
2039	ENSMUSG00000023951.19	Vegfa	chr17	-	46333202	46333274	46329783	46329805	46334990	46335020	2039	0,0,0	13,5,18	2,0,0	30,36,29	221	149	1	1	0.0,0.0,0.0	0.043,0.0,0.0	-0.014		3189	ENSMUSG00000020658.11	Efr3b	chr12	-	4049589	4050956	4049589	4049717	4050879	4050956	3189	5,0,2	0,0,2	3,0,2	1,0,0	1311	149	1	1	1.0,NA,0.102	0.254,NA,1.0	-0.076		1396	ENSMUSG00000004500.10
2040	ENSMUSG00000023951.19	Vegfa	chr17	-	46333202	46333274	46331916	46332048	46334990	46335020	2040	2,1,0	15,7,24	7,1,3	85,34,38	221	149	0.141292	1	0.082,0.088,0.0	0.053,0.019,0.051	0.016		3191	ENSMUSG00000031652.12	N4bp1	chr8	-	87573442	87575182	87573442	87573550	87575074	87575182	3191	15,27,12	13,7,6	40,34,22	11,8,24	1673	149	0.685849	1	0.093,0.256,0.151	0.245,0.275,0.075	-0.032		1400	ENSMUSG00000044308.18
2041	ENSMUSG00000023951.19	Vegfa	chr17	-	46333220	46333274	46331916	46332048	46334990	46335020	2041	0,0,0	15,7,24	2,0,0	85,34,38	203	149	1	1	0.0,0.0,0.0	0.017,0.0,0.0	-0.006		3192	ENSMUSG00000097248.10	Gm2694	chr8	+	88250923	88252180	88250923	88251055	88252042	88252180	3192	1,0,0	4,0,5	13,2,6	8,8,8	1136	149	1	1	0.032,NA,0.0	0.176,0.032,0.09	-0.083		1401	ENSMUSG00000029207.17
2042	ENSMUSG00000035476.10	Tab3	chrX	+	84619155	84619216	84617627	84617771	84652995	84653190	2042	0,0,5	3,0,3	3,4,2	1,0,2	210	149	1	1	0.0,NA,0.542	0.68,1.0,0.415	-0.427		3194	ENSMUSG00000036810.17	Cnep1r1	chr8	+	88856322	88857029	88856322	88856432	88856974	88857029	3194	12,14,10	14,24,17	14,24,2	25,24,19	691	149	0.69482	1	0.156,0.112,0.113	0.108,0.177,0.022	0.025		1402	ENSMUSG00000029207.17
2043	ENSMUSG00000035476.10	Tab3	chrX	+	84637257	84637360	84619155	84619216	84652995	84653190	2043	0,1,0	0,0,2	2,0,3	2,1,2	252	149	1	1	NA,1.0,0.0	0.372,0.0,0.47	0.219		3198	ENSMUSG00000019039.15	Dalrd3	chr9	+	108448980	108449496	108448980	108449063	108449385	108449496	3198	15,27,18	0,0,0	10,19,21	0,1,0	471	149	1	1	1.0,1.0,1.0	1.0,0.857,1.0	0.048		1404	ENSMUSG00000038777.20
2045	ENSMUSG00000035476.10	Tab3	chrX	+	84665159	84665253	84659979	84660140	84667947	84668031	2045	38,25,20	0,2,1	22,34,20	1,0,1	243	149	1	1	1.0,0.885,0.925	0.931,1.0,0.925	-0.015		3200	ENSMUSG00000031787.9	Katnb1	chr8	+	95822516	95823034	95822516	95822647	95822983	95823034	3200	8,7,3	26,20,40	7,11,2	23,44,44	485	149	0.782634	1	0.086,0.097,0.023	0.086,0.071,0.014	0.012		1408	ENSMUSG00000037846.19
2046	ENSMUSG00000036026.16	Tmem63b	chr17	-	45974432	45974595	45973788	45973894	45975669	45975735	2046	41,38,60	0,0,1	59,57,50	0,0,0	312	149	1	1	1.0,1.0,0.966	1.0,1.0,1.0	-0.011		3201	ENSMUSG00000031787.9	Katnb1	chr8	+	95824582	95824808	95824582	95824659	95824733	95824808	3201	2,2,1	13,16,10	3,2,1	15,13,16	223	149	0.848289	1	0.093,0.077,0.063	0.118,0.093,0.04	-0.006		1409	ENSMUSG00000026429.10
2047	ENSMUSG00000036026.16	Tmem63b	chr17	-	45989888	45989927	45988851	45988942	45990162	45990242	2047	7,7,12	5,3,0	9,20,20	10,4,6	188	149	0.423389	1	0.526,0.649,1.0	0.416,0.798,0.725	0.079		3206	ENSMUSG00000036550.17	Cnot1	chr8	-	96498598	96500114	96498598	96498802	96500059	96500114	3206	32,37,32	34,18,54	36,62,27	40,34,53	1406	149	0.96675	1	0.091,0.179,0.059	0.087,0.162,0.051	0.01		1410	ENSMUSG00000036371.7
2049	ENSMUSG00000036026.16	Tmem63b	chr17	-	45991513	45991567	45990457	45990640	45997042	45997185	2049	1,0,0	7,3,3	0,0,0	11,4,8	203	149	1	1	0.095,0.0,0.0	0.0,0.0,0.0	0.032		3208	ENSMUSG00000022536.15	Glyr1	chr16	-	4866613	4867721	4866613	4866650	4867669	4867721	3208	34,28,25	9,8,18	37,27,27	5,8,26	1168	149	0.891756	1	0.325,0.309,0.151	0.486,0.301,0.117	-0.04		1411	ENSMUSG00000021488.9
2053	ENSMUSG00000023942.16	Slc29a1	chr17	-	45903104	45903187	45901182	45901264	45906407	45906428	2053	33,17,44	0,0,1	48,54,37	0,0,0	232	149	1	1	1.0,1.0,0.966	1.0,1.0,1.0	-0.011		3210	ENSMUSG00000059248.14	Septin9	chr11	+	117247438	117250296	117247438	117247535	117250244	117250296	3210	78,46,26	520468529	64,59,47	487685644	2858	149	1	1	0.008,0.005,0.003	0.007,0.004,0.004	0		1412	ENSMUSG00000029247.18
2055	ENSMUSG00000023942.16	Slc29a1	chr17	-	45903104	45903269	45901182	45901264	45906407	45906428	2055	33,14,45	0,0,1	46,52,38	0,0,0	314	149	1	1	1.0,1.0,0.955	1.0,1.0,1.0	-0.015		3218	ENSMUSG00000044258.11	Ctla2a	chr13	-	61083360	61083889	61083360	61083483	61083771	61083889	3218	0,2,1	1,1,4	0,0,0	3,2,13	437	149	0.684848	1	0.0,0.405,0.079	0.0,0.0,0.0	0.161		1414	ENSMUSG00000060477.15
2056	ENSMUSG00000023942.16	Slc29a1	chr17	-	45904257	45904358	45901182	45901264	45906407	45906441	2056	10,6,12	0,0,1	12,18,9	0,0,0	250	149	1	1	1.0,1.0,0.877	1.0,1.0,1.0	-0.041		3222	ENSMUSG00000018442.14	Derl2	chr11	-	70904268	70906626	70904268	70904464	70906552	70906626	3222	13,26,35	0,0,0	27,36,36	0,1,0	2237	149	1	1	1.0,1.0,1.0	1.0,0.706,1.0	0.098		1415	ENSMUSG00000033124.17
2058	ENSMUSG00000023942.16	Slc29a1	chr17	-	45904257	45904358	45903104	45903187	45906407	45906441	2058	14,22,30	0,3,0	25,35,29	3,2,0	250	149	0.23936	1	1.0,0.814,1.0	0.832,0.913,1.0	0.023		3226	ENSMUSG00000036270.17	Edc4	chr8	+	106614413	106614677	106614413	106614486	106614585	106614677	3226	0,0,0	65,57,70	1,0,0	35,65,50	248	149	1	1	0.0,0.0,0.0	0.017,0.0,0.0	-0.006		1420	ENSMUSG00000028849.18
2062	ENSMUSG00000023944.15	Hsp90ab1	chr17	-	45881183	45881468	45880503	45880752	45882804	45882837	2062	204816482858	0,0,0	231426373326	0,1,0	434	149	1	1	1.0,1.0,1.0	1.0,0.999,1.0	0		3227	ENSMUSG00000031896.8	Ctrl	chr8	-	106659455	106659691	106659455	106659537	106659611	106659691	3227	1,1,6	0,0,0	0,0,5	0,0,2	223	149	1	1	1.0,1.0,1.0	NA,NA,0.626	0.374		1422	ENSMUSG00000030102.12
2067	ENSMUSG00000038954.15	Supt3	chr17	+	45344124	45344200	45313976	45314116	45347598	45347711	2067	5,10,20	1,0,0	31,32,18	0,0,0	225	149	1	1	0.768,1.0,1.0	1.0,1.0,1.0	-0.077		3243	ENSMUSG00000061410.7	Zcchc14	chr8	-	122335818	122336054	122335818	122335873	122335959	122336054	3243	0,5,7	12,14,18	2,4,4	18,17,16	235	149	0.702924	1	0.0,0.185,0.198	0.066,0.13,0.137	0.017		1424	ENSMUSG00000067916.10
2073	ENSMUSG00000023963.11	Cyp39a1	chr17	+	43987721	43987857	43978315	43978685	43991014	43991189	2073	27,26,22	0,1,0	37,34,19	0,0,0	285	149	1	1	1.0,0.931,1.0	1.0,1.0,1.0	-0.023		3244	ENSMUSG00000049482.17	Ctu2	chr8	+	123205631	123206151	123205631	123205933	123206015	123206151	3244	3,1,3	11,10,23	5,1,2	7,22,15	231	149	0.657863	1	0.15,0.061,0.078	0.315,0.028,0.079	-0.044		1426	ENSMUSG00000036641.10
2075	ENSMUSG00000023963.11	Cyp39a1	chr17	+	44002524	44002629	43996076	43996167	44012367	44012458	2075	3,6,8	0,0,0	12,1,20	0,1,0	254	149	1	1	1.0,1.0,1.0	1.0,0.37,1.0	0.21		3245	ENSMUSG00000049482.17	Ctu2	chr8	+	123207640	123207963	123207640	123207744	123207824	123207963	3245	0,3,5	20,13,21	5,2,2	12,13,28	229	149	0.748262	1	0.0,0.131,0.134	0.213,0.091,0.044	-0.028		1432	ENSMUSG00000026074.16
2078	ENSMUSG00000056492.7	Adgrf5	chr17	+	43750566	43750686	43748406	43748577	43750841	43751051	2078	6,9,10	0,0,0	13,9,12	0,0,3	269	149	0.548999	1	1.0,1.0,1.0	1.0,1.0,0.689	0.104		3250	ENSMUSG00000001062.19	Vps9d1	chr8	-	123971852	123972451	123971852	123971949	123972220	123972451	3250	13,17,11	1,0,2	20,14,10	3,0,0	420	149	0.693356	1	0.822,1.0,0.661	0.703,1.0,1.0	-0.073		1433	ENSMUSG00000026790.20
2079	ENSMUSG00000061665.8	Cd2ap	chr17	-	43156216	43156370	43149592	43149693	43187203	43187556	2079	27,26,33	0,1,0	72,66,43	0,0,0	303	149	1	1	1.0,0.927,1.0	1.0,1.0,1.0	-0.024		3255	ENSMUSG00000026965.13	Anapc2	chr2	+	25162926	25163944	25162926	25163549	25163811	25163944	3255	14,18,11	18,27,32	22,14,23	28,24,46	411	149	0.732404	1	0.22,0.195,0.111	0.222,0.175,0.153	-0.008		1437	ENSMUSG00000067629.14
2080	ENSMUSG00000061665.8	Cd2ap	chr17	-	43163258	43163419	43156216	43156370	43187203	43187280	2080	39,28,37	0,0,2	67,36,53	0,0,0	310	149	1	1	1.0,1.0,0.899	1.0,1.0,1.0	-0.034		3256	ENSMUSG00000031808.8	Slc27a1	chr8	+	72032047	72032712	72032047	72032442	72032550	72032712	3256	0,0,0	5,2,0	2,1,1	3,7,4	257	149	1	1	0.0,0.0,NA	0.279,0.076,0.127	-0.161		1440	ENSMUSG00000027829.16
2083	ENSMUSG00000071653.10	1810009A15Rik	chr19	+	8867000	8867091	8866302	8866612	8867366	8867464	2083	4,1,4	110101174	4,3,8	146148208	240	149	0.437443	1	0.022,0.006,0.014	0.017,0.012,0.023	-0.003		3258	ENSMUSG00000027655.15	Dhx35	chr2	+	158668224	158669919	158668224	158668337	158669822	158669919	3258	12,12,9	11,2,4	19,5,12	2,13,5	1634	149	0.87088	1	0.09,0.354,0.17	0.464,0.034,0.18	-0.021		1441	ENSMUSG00000027829.16
2091	ENSMUSG00000024462.18	Gabbr1	chr17	+	37378105	37378256	37375551	37375629	37378667	37378800	2091	1,4,3	2,2,0	5,3,3	11,0,5	300	149	0.534643	1	0.199,0.498,1.0	0.184,1.0,0.23	0.094		3270	ENSMUSG00000031939.17	Taf1d	chr9	+	15221653	15222991	15221653	15221705	15222822	15222991	3270	92,65,83	21,11,45	50,72,76	17,17,29	1266	149	0.790977	1	0.34,0.41,0.178	0.257,0.333,0.236	0.034		1443	ENSMUSG00000028651.13
2094	ENSMUSG00000045409.17	Trim39	chr17	-	36578593	36578884	36578016	36578112	36579500	36579644	2094	5,4,6	12,10,6	12,9,12	12,20,27	440	149	0.690381	1	0.124,0.119,0.253	0.253,0.132,0.131	-0.007		3272	ENSMUSG00000031939.17	Taf1d	chr9	+	15225285	15226427	15225285	15225560	15226397	15226427	3272	115117165	7,12,13	112137169	9,14,9	986	149	0.870307	1	0.713,0.596,0.657	0.653,0.597,0.739	-0.008		1447	ENSMUSG00000068040.11
2095	ENSMUSG00000038500.16	Prr3	chr17	-	36285414	36285705	36283432	36284695	36289272	36289335	2095	53,23,49	3,0,1	21,24,42	0,2,0	440	149	0.504923	1	0.857,1.0,0.943	1.0,0.803,1.0	-0.001		3274	ENSMUSG00000031939.17	Taf1d	chr9	+	15226678	15228274	15226678	15226736	15228184	15228274	3274	194614391913	5,1,2	222125052320	1,5,5	1597	149	0.777551	1	0.973,0.993,0.989	0.995,0.979,0.977	0.001		1449	ENSMUSG00000034867.17
2097	ENSMUSG00000024426.18	Atat1	chr17	-	36209148	36209191	36208486	36208807	36209279	36209359	2097	3,1,3	1,1,0	6,5,3	0,0,0	192	149	1	1	0.7,0.437,1.0	1.0,1.0,1.0	-0.288		3281	ENSMUSG00000032127.10	Vps11	chr9	-	44266995	44267726	44266995	44267147	44267591	44267726	3281	0,2,7	0,0,3	6,2,6	0,2,1	593	149	1	1	NA,1.0,0.37	1.0,0.201,0.601	0.084		1453	ENSMUSG00000041375.20
2099	ENSMUSG00000024426.18	Atat1	chr17	-	36213247	36213330	36212874	36212946	36214999	36215068	2099	1,1,2	0,13,7	1,0,4	6,8,12	232	149	0.823238	1	1.0,0.047,0.155	0.097,0.0,0.176	0.31		3286	ENSMUSG00000084786.10	Ubl5	chr9	+	20556488	20556785	20556488	20556555	20556701	20556785	3286	5,3,17	166141208	12,9,15	192259263	295	149	0.844074	1	0.015,0.011,0.04	0.031,0.017,0.028	-0.003		1456	ENSMUSG00000044320.15
2101	ENSMUSG00000024426.18	Atat1	chr17	-	36214999	36215068	36212874	36212946	36215181	36215219	2101	8,15,17	13,9,6	15,13,18	7,14,16	218	149	0.789958	1	0.296,0.533,0.659	0.594,0.388,0.435	0.024		3288	ENSMUSG00000038884.15	Shfl	chr9	+	20784163	20784560	20784163	20784267	20784405	20784560	3288	1,0,0	2,0,1	1,2,0	0,0,0	287	149	1	1	0.206,NA,0.0	1.0,1.0,NA	-0.897		1460	ENSMUSG00000001143.14
2102	ENSMUSG00000024426.18	Atat1	chr17	-	36214999	36215068	36213247	36213330	36215181	36215219	2102	8,2,10	3,1,0	9,5,9	1,0,0	218	149	0.208612	1	0.646,0.578,1.0	0.86,1.0,1.0	-0.212		3292	ENSMUSG00000032178.15	Ilf3	chr9	+	21309264	21310546	21309264	21309432	21310408	21310546	3292	15,35,24	2,1,1	24,35,38	3,4,0	1125	149	0.569995	1	0.498,0.823,0.761	0.514,0.537,1.0	0.01		1461	ENSMUSG00000006386.16
2103	ENSMUSG00000050705.16	2310061I04Rik	chr17	-	36207151	36207337	36206811	36206964	36207936	36207995	2103	7,3,3	0,0,0	4,5,2	0,2,0	335	149	0.820433	1	1.0,1.0,1.0	1.0,0.527,1.0	0.158		3294	ENSMUSG00000006589.9	Aprt	chr8	-	123302857	123303360	123302857	123302970	123303253	123303360	3294	2,3,13	0,0,2	5,5,7	0,1,0	432	149	1	1	1.0,1.0,0.692	1.0,0.633,1.0	0.02		1464	ENSMUSG00000035172.16
2104	ENSMUSG00000024422.15	Dhx16	chr17	+	36201806	36201980	36200330	36200492	36203310	36203517	2104	65,49,91	0,0,2	79,68,53	0,2,1	323	149	0.520704	1	1.0,1.0,0.955	1.0,0.94,0.961	0.018		3296	ENSMUSG00000032182.16	Yipf2	chr9	-	21499977	21501056	21499977	21500854	21500930	21501056	3296	9,9,3	1,0,0	4,11,13	1,0,1	225	149	1	1	0.856,1.0,1.0	0.726,1.0,0.896	0.078		1467	ENSMUSG00000026648.19
2105	ENSMUSG00000003534.18	Ddr1	chr17	-	35997372	35997483	35996197	35996442	35998036	35998202	2105	39,24,40	8,15,9	34,40,27	11,11,20	260	149	0.462497	1	0.736,0.478,0.718	0.639,0.676,0.436	0.06		3297	ENSMUSG00000032193.10	Ldlr	chr9	+	21650150	21650853	21650150	21650276	21650681	21650853	3297	13,9,2	45,27,23	9,13,11	52,49,48	554	149	0.905064	1	0.072,0.082,0.023	0.044,0.067,0.058	0.003		1468	ENSMUSG00000047909.12
2106	ENSMUSG00000003534.18	Ddr1	chr17	-	36002019	36002122	36000885	36001072	36002338	36002486	2106	13,15,8	2,1,0	15,8,21	0,0,0	252	149	0.763393	1	0.794,0.899,1.0	1.0,1.0,1.0	-0.102		3298	ENSMUSG00000032198.10	Dock6	chr9	-	21711475	21712628	21711475	21711695	21712466	21712628	3298	14,9,8	45,19,38	23,14,4	46,48,48	920	149	0.789704	1	0.048,0.071,0.033	0.075,0.045,0.013	0.006		1469	ENSMUSG00000047909.12
2107	ENSMUSG00000003534.18	Ddr1	chr17	-	36014815	36015031	36004679	36004809	36015422	36015491	2107	20,16,13	0,0,0	17,6,17	0,0,3	365	149	0.615224	1	1.0,1.0,1.0	1.0,1.0,0.698	0.101		3299	ENSMUSG00000040146.10	Rgl3	chr9	-	21888034	21888273	21888034	21888156	21888240	21888273	3299	3,6,5	1,0,0	2,7,0	0,0,0	233	149	1	1	0.657,1.0,1.0	1.0,1.0,NA	-0.114		1471	ENSMUSG00000019518.12
2109	ENSMUSG00000019432.16	Ddx39b	chr17	+	35463431	35463524	35463111	35463239	35465912	35466096	2109	343301473	0,0,0	309305347	1,0,0	242	149	1	1	1.0,1.0,1.0	0.995,1.0,1.0	0.002		3301	ENSMUSG00000040146.10	Rgl3	chr9	-	21888034	21888725	21888034	21888572	21888677	21888725	3301	2,4,2	2,3,4	2,0,6	9,0,2	254	149	1	1	0.37,0.439,0.227	0.115,NA,0.638	-0.031		1472	ENSMUSG00000019518.12
2113	ENSMUSG00000024393.15	Prrc2a	chr17	-	35373441	35373572	35373083	35373213	35373767	35374036	2113	293219326	1,1,1	300272334	0,0,1	280	149	1	1	0.994,0.991,0.994	1.0,1.0,0.994	-0.005		3303	ENSMUSG00000038895.17	Zfp653	chr9	-	21968796	21969711	21968796	21968974	21969099	21969711	3303	3,1,4	1,1,0	3,0,3	0,0,1	274	149	1	1	0.62,0.352,1.0	1.0,NA,0.62	-0.153		1475	ENSMUSG00000030047.15
2114	ENSMUSG00000024393.15	Prrc2a	chr17	-	35376323	35376534	35374341	35376183	35376854	35377155	2114	492437531	0,0,1	467593589	0,0,0	360	149	1	1	1.0,1.0,0.995	1.0,1.0,1.0	-0.002		3305	ENSMUSG00000013622.16	Atraid	chr5	+	31209540	31210228	31209540	31209612	31210106	31210228	3305	5,6,5	0,0,0	27,9,7	0,2,0	643	149	0.789112	1	1.0,1.0,1.0	1.0,0.51,1.0	0.163		1478	ENSMUSG00000026313.17
2119	ENSMUSG00000036185.10	Sapcd1	chr17	-	35246419	35246560	35245669	35245762	35246772	35246992	2119	0,0,2	0,0,0	0,2,0	0,2,0	290	149	1	1	NA,NA,1.0	NA,0.339,NA	0.661		3306	ENSMUSG00000045994.18	B3gat1	chr9	+	26662800	26663186	26662800	26662895	26663039	26663186	3306	1,0,0	3,1,0	0,0,2	0,1,3	293	149	1	1	0.145,0.0,NA	NA,0.0,0.253	-0.054		1480	ENSMUSG00000014763.9
2120	ENSMUSG00000036185.10	Sapcd1	chr17	-	35246419	35246564	35245669	35245762	35246772	35246890	2120	0,0,1	0,0,0	1,2,0	0,2,0	294	149	1	1	NA,NA,1.0	1.0,0.336,NA	0.332		3311	ENSMUSG00000038119.16	Cdon	chr9	+	35375170	35375524	35375170	35375325	35375436	35375524	3311	36,31,38	0,0,0	59,40,41	1,0,0	260	149	1	1	1.0,1.0,1.0	0.971,1.0,1.0	0.01		1484	ENSMUSG00002076083.1
2121	ENSMUSG00000007029.17	Vars	chr17	+	35224450	35224578	35224225	35224326	35229481	35229646	2121	264236358	0,0,0	332427391	4,0,2	277	149	1	1	1.0,1.0,1.0	0.978,1.0,0.991	0.01		3312	ENSMUSG00000032103.11	Pus3	chr9	+	35476079	35477151	35476079	35476493	35476585	35477151	3312	23,6,8	6,6,12	9,15,18	9,8,6	241	149	0.620186	1	0.703,0.382,0.292	0.382,0.537,0.65	-0.064		1485	ENSMUSG00002076083.1
2122	ENSMUSG00000007029.17	Vars	chr17	+	35229813	35229895	35229481	35229646	35230180	35230300	2122	323285466	1,0,4	418451482	2,0,0	231	149	1	1	0.995,1.0,0.987	0.993,1.0,1.0	-0.004		3321	ENSMUSG00000035697.15	Arhgap45	chr10	+	79857910	79858189	79857910	79858021	79858108	79858189	3321	0,0,0	3,0,4	2,1,0	11,12,6	236	149	1	1	0.0,NA,0.0	0.103,0.05,0.0	-0.051		1490	ENSMUSG00000028646.17
2124	ENSMUSG00000024371.15	C2	chr17	-	35113870	35113911	35112586	35112676	35114382	35114533	2124	0,1,0	0,0,0	0,0,0	1,0,3	190	149	1	1	NA,1.0,NA	0.0,NA,0.0	1		3323	ENSMUSG00000021868.8	Ppif	chr14	+	25696427	25698765	25696427	25696516	25698689	25698765	3323	30,28,35	1,0,2	36,51,30	0,0,2	2322	149	0.643425	1	0.658,1.0,0.529	1.0,1.0,0.49	-0.101		1491	ENSMUSG00000026127.14
2126	ENSMUSG00000040356.17	Skiv2l	chr17	-	35060043	35060194	35059833	35059960	35060417	35060522	2126	38,40,59	0,0,0	30,48,51	0,2,0	300	149	1	1	1.0,1.0,1.0	1.0,0.923,1.0	0.026		3327	ENSMUSG00000028104.15	Polr3gl	chr3	-	96487113	96487405	96487113	96487227	96487331	96487405	3327	0,0,0	1,0,0	3,0,0	1,1,1	253	149	1	1	0.0,NA,NA	0.639,0.0,0.0	-0.213		1496	ENSMUSG00000025997.14
2128	ENSMUSG00000040356.17	Skiv2l	chr17	-	35061787	35062018	35060919	35061057	35063313	35063424	2128	26,21,33	0,0,0	19,29,39	0,1,0	380	149	1	1	1.0,1.0,1.0	1.0,0.919,1.0	0.027		3331	ENSMUSG00000078765.12	U2af1l4	chr7	+	30262750	30263044	30262750	30262824	30262956	30263044	3331	7,2,1	7,3,1	3,6,2	2,1,7	281	149	0.763243	1	0.347,0.261,0.347	0.443,0.761,0.132	-0.127		1500	ENSMUSG00000078974.11
2129	ENSMUSG00000040356.17	Skiv2l	chr17	-	35066118	35066300	35065842	35065971	35066383	35066437	2129	22,14,26	0,0,0	34,33,20	0,1,0	331	149	1	1	1.0,1.0,1.0	1.0,0.937,1.0	0.021		3333	ENSMUSG00000078765.12	U2af1l4	chr7	+	30263506	30263726	30263506	30263556	30263627	30263726	3333	0,0,3	8,1,6	0,1,0	5,10,3	220	149	0.744449	1	0.0,0.0,0.253	0.0,0.063,0.0	0.063		1504	ENSMUSG00000039599.17
2130	ENSMUSG00000040482.17	Dxo	chr17	+	35056876	35057112	35056368	35056730	35057201	35057421	2130	23,27,43	0,0,1	19,44,42	0,0,0	385	149	1	1	1.0,1.0,0.943	1.0,1.0,1.0	-0.019		3338	ENSMUSG00000021431.16	Snrnp48	chr13	+	38401349	38404752	38401349	38401471	38404663	38404752	3338	170144178	13,17,20	193184151	19,18,19	3341	149	0.851725	1	0.368,0.274,0.284	0.312,0.313,0.262	0.013		1505	ENSMUSG00000039599.17
2135	ENSMUSG00000015474.17	Ppt2	chr17	-	34844610	34844718	34842004	34842088	34844809	34844905	2135	23,20,44	0,1,0	39,42,41	0,0,0	257	149	1	1	1.0,0.921,1.0	1.0,1.0,1.0	-0.026		3339	ENSMUSG00000058546.9	Rpl23a	chr11	-	78071760	78072049	78071760	78071823	78071979	78072049	3339	17,10,20	482426632	18,31,17	625741760	305	149	0.919762	1	0.017,0.011,0.015	0.014,0.02,0.011	-0.001		1506	ENSMUSG00000026239.15
2136	ENSMUSG00000015474.17	Ppt2	chr17	-	34844809	34844905	34842004	34842088	34845432	34845586	2136	6,5,15	0,0,2	16,9,8	0,0,0	245	149	1	1	1.0,1.0,0.82	1.0,1.0,1.0	-0.06		3341	ENSMUSG00000028047.12	Thbs3	chr3	+	89130309	89130830	89130309	89130469	89130711	89130830	3341	27,30,29	0,6,4	29,29,17	1,2,4	391	149	0.639288	1	1.0,0.656,0.734	0.917,0.847,0.618	0.003		1512	ENSMUSG00000042323.18
2137	ENSMUSG00000015467.15	Egfl8	chr17	-	34832750	34832904	34832322	34832555	34832982	34833065	2137	0,1,2	0,0,0	0,1,0	0,0,3	303	149	1	1	NA,1.0,1.0	NA,1.0,0.0	0.5		3342	ENSMUSG00000028047.12	Thbs3	chr3	+	89131883	89132313	89131883	89131932	89132116	89132313	3342	14,8,4	3,0,1	13,8,14	1,2,2	333	149	0.810421	1	0.676,1.0,0.642	0.853,0.642,0.758	0.022		1514	ENSMUSG00000033342.16
2138	ENSMUSG00000015478.14	Rnf5	chr17	-	34820907	34820962	34820714	34820832	34821058	34821171	2138	32,35,34	0,0,0	33,32,51	0,4,0	204	149	0.750662	1	1.0,1.0,1.0	1.0,0.854,1.0	0.049		3345	ENSMUSG00000020134.14	Peli1	chr11	+	21090563	21092657	21090563	21090693	21092555	21092657	3345	42,45,16	15,22,23	39,34,40	25,19,31	2011	149	0.711718	1	0.172,0.132,0.049	0.104,0.117,0.087	0.015		1516	ENSMUSG00000030330.16
2147	ENSMUSG00000057246.17	BC051142	chr17	+	34636936	34637078	34636397	34636507	34637828	34637915	2147	0,1,0	0,0,0	0,0,0	3,0,0	291	149	1	1	NA,1.0,NA	0.0,NA,NA	1		3346	ENSMUSG00000032085.6	Tagln	chr9	-	45842130	45842775	45842130	45842233	45842597	45842775	3346	1,1,0	0,1,0	2,5,0	5,0,1	513	149	1	1	1.0,0.225,NA	0.104,1.0,0.0	0.244		1518	ENSMUSG00000030330.16
2148	ENSMUSG00000057246.17	BC051142	chr17	+	34639360	34639387	34638525	34638558	34640826	34640856	2148	0,1,0	0,0,1	2,0,0	0,0,0	176	149	1	1	NA,1.0,0.0	1.0,NA,NA	-0.5		3348	ENSMUSG00000034908.17	Sidt2	chr9	-	45856441	45856657	45856441	45856508	45856583	45856657	3348	0,0,1	26,29,40	0,0,0	44,29,33	224	149	1	1	0.0,0.0,0.016	0.0,0.0,0.0	0.005		1525	ENSMUSG00000020827.19
2155	ENSMUSG00000024335.21	Brd2	chr17	-	34333323	34333452	34332905	34333151	34333863	34334238	2155	117,99,128	1,1,0	135137153	0,0,0	278	149	1	1	0.984,0.982,1.0	1.0,1.0,1.0	-0.011		3349	ENSMUSG00000040219.5	Ttc12	chr9	-	49383161	49383843	49383161	49383183	49383682	49383843	3349	4,3,6	1,0,0	2,6,0	0,0,0	648	149	1	1	0.479,1.0,1.0	1.0,1.0,NA	-0.174		1527	ENSMUSG00000059439.16
2156	ENSMUSG00000024335.21	Brd2	chr17	-	34333323	34333477	34333020	34333151	34333863	34334216	2156	54,51,54	1,1,0	53,58,58	0,0,0	303	149	1	1	0.964,0.962,1.0	1.0,1.0,1.0	-0.025		3352	ENSMUSG00000037971.11	1110032A03Rik	chr9	-	50675523	50676226	50675523	50675590	50676064	50676226	3352	10,6,0	0,0,0	7,5,5	0,0,3	623	149	1	1	1.0,1.0,NA	1.0,1.0,0.285	0.238		1529	ENSMUSG00000046865.8
2157	ENSMUSG00000024335.21	Brd2	chr17	-	34333323	34333624	34332905	34333151	34333863	34334050	2157	72,62,76	1,1,0	68,72,66	0,0,0	450	149	1	1	0.96,0.954,1.0	1.0,1.0,1.0	-0.029		3354	ENSMUSG00000037112.17	Sik2	chr9	-	50804100	50805381	50804100	50804689	50805257	50805381	3354	13,8,27	1,0,0	10,17,24	1,0,0	717	149	1	1	0.73,1.0,1.0	0.675,1.0,1.0	0.018		1530	ENSMUSG00000029534.18
2171	ENSMUSG00000024327.17	Slc39a7	chr17	-	34249797	34250236	34249539	34249708	34250521	34250636	2171	133106172	0,0,0	168154177	4,0,0	588	149	0.552515	1	1.0,1.0,1.0	0.914,1.0,1.0	0.029		3358	ENSMUSG00000034211.15	Mrps17	chr5	+	129792747	129793930	129792747	129792922	129793790	129793930	3358	37,37,46	0,3,0	27,44,47	0,1,1	1017	149	1	1	1.0,0.644,1.0	1.0,0.866,0.873	-0.032		1534	ENSMUSG00000027722.15
2172	ENSMUSG00000092595.3	Gm20427	chr17	-	34245369	34245444	34245007	34245199	34245636	34245679	2172	26,24,23	0,0,0	28,29,32	0,3,0	224	149	0.801607	1	1.0,1.0,1.0	1.0,0.865,1.0	0.045		3360	ENSMUSG00000034211.15	Mrps17	chr5	+	129792747	129793930	129792747	129792976	129793790	129793930	3360	26,33,23	0,1,0	24,24,36	2,0,0	963	149	1	1	1.0,0.836,1.0	0.65,1.0,1.0	0.062		1535	ENSMUSG00000054252.19
2173	ENSMUSG00000092595.3	Gm20427	chr17	-	34245636	34245679	34245369	34245444	34245824	34246075	2173	26,34,27	1,1,2	37,41,40	2,0,4	192	149	0.689702	1	0.953,0.963,0.913	0.935,1.0,0.886	0.003		3361	ENSMUSG00000034211.15	Mrps17	chr5	+	129792747	129793930	129792747	129793005	129793790	129793930	3361	25,33,22	0,0,1	24,24,35	2,0,1	934	149	0.714373	1	1.0,1.0,0.778	0.657,1.0,0.848	0.091		1536	ENSMUSG00000002279.20
2174	ENSMUSG00000073422.12	H2-Ke6	chr17	-	34245989	34246075	34245824	34245909	34246176	34246269	2174	27,30,41	0,0,1	61,51,55	0,0,0	235	149	1	1	1.0,1.0,0.963	1.0,1.0,1.0	-0.012		3362	ENSMUSG00000034218.17	Atm	chr9	-	53444959	53445266	53444959	53445072	53445164	53445266	3362	0,0,1	8,1,7	1,1,0	5,11,7	241	149	1	1	0.0,0.0,0.081	0.11,0.053,0.0	-0.027		1537	ENSMUSG00000026470.15
2176	ENSMUSG00000024325.9	Ring1	chr17	-	34241269	34241659	34240656	34240930	34241952	34242168	2176	16,26,41	0,1,0	23,30,35	0,0,0	539	149	1	1	1.0,0.878,1.0	1.0,1.0,1.0	-0.041		3364	ENSMUSG00000032030.17	Cul5	chr9	-	53553817	53554126	53553817	53553898	53553980	53554126	3364	2,1,2	17,14,17	1,1,0	19,17,18	231	149	1	1	0.071,0.044,0.071	0.033,0.037,0.0	0.039		1539	ENSMUSG00000036067.13
2178	ENSMUSG00000061232.17	H2-K1	chr17	-	34215800	34215833	34215589	34215628	34216011	34216131	2178	13,10,3	0,0,0	10,9,21	0,0,2	182	149	1	1	1.0,1.0,1.0	1.0,1.0,0.896	0.035		3365	ENSMUSG00000041268.18	Dmxl2	chr9	-	54274837	54276546	54274837	54275055	54276493	54276546	3365	16,12,7	3,3,6	21,14,16	4,8,5	1587	149	0.827192	1	0.334,0.273,0.099	0.33,0.141,0.231	0.001		1540	ENSMUSG00000036990.14
2179	ENSMUSG00000061232.17	H2-K1	chr17	-	34215800	34215848	34215589	34215628	34216011	34216131	2179	2,10,1	0,0,0	8,5,11	0,0,2	197	149	1	1	1.0,1.0,1.0	1.0,1.0,0.806	0.065		3367	ENSMUSG00000032322.15	Pstpip1	chr9	+	56034768	56035144	56034768	56034821	56035010	56035144	3367	0,1,2	0,1,0	1,5,3	0,0,0	338	149	1	1	NA,0.306,1.0	1.0,1.0,1.0	-0.347		1543	ENSMUSG00000039456.11
2181	ENSMUSG00000024319.19	Vps52	chr17	+	34180586	34180742	34180084	34180218	34181040	34181159	2181	49,49,71	0,0,1	52,98,61	0,0,0	305	149	1	1	1.0,1.0,0.972	1.0,1.0,1.0	-0.009		3368	ENSMUSG00000000088.8	Cox5a	chr9	+	57436238	57437645	57436238	57436355	57437523	57437645	3368	9,12,10	70,76,142	4,9,18	82,80,130	1317	149	0.953039	1	0.014,0.018,0.008	0.005,0.013,0.015	0.002		1547	ENSMUSG00000028673.11
2182	ENSMUSG00000079553.12	Kifc1	chr17	-	34100961	34101035	34100402	34100478	34101130	34101421	2182	31,21,37	0,1,0	43,50,36	0,0,0	223	149	1	1	1.0,0.933,1.0	1.0,1.0,1.0	-0.022		3374	ENSMUSG00000030272.16	Camk1	chr6	-	113315240	113316542	113315240	113315367	113316245	113316542	3374	2,10,10	2,3,0	11,3,1	1,2,0	1027	149	0.760389	1	0.127,0.326,1.0	0.615,0.179,1.0	-0.114		1551	ENSMUSG00000074282.11
2184	ENSMUSG00000079553.12	Kifc1	chr17	-	34104141	34104192	34103562	34103960	34104822	34104876	2184	34,34,41	0,0,0	66,37,38	0,0,1	200	149	1	1	1.0,1.0,1.0	1.0,1.0,0.966	0.011		3382	ENSMUSG00000032816.16	Igdcc4	chr9	+	65031893	65032704	65031893	65032058	65032566	65032704	3382	0,4,0	0,0,1	5,2,2	3,3,2	657	149	1	1	NA,1.0,0.0	0.274,0.131,0.185	0.303		1555	ENSMUSG00000015950.14
2186	ENSMUSG00000041881.14	Ndufa7	chr17	+	34044574	34044624	34043545	34043654	34048640	34048790	2186	45,38,88	0,2,6	76,55,89	4,4,2	199	149	0.828254	1	1.0,0.934,0.917	0.934,0.911,0.971	0.012		3385	ENSMUSG00000012076.9	Brms1l	chr12	+	55914946	55916521	55914946	55915305	55916182	55916521	3385	45,56,103	0,0,1	50,67,76	0,0,0	1026	149	1	1	1.0,1.0,0.937	1.0,1.0,1.0	-0.021		1556	ENSMUSG00000021714.16
2187	ENSMUSG00000041881.14	Ndufa7	chr17	+	34046775	34046882	34044574	34044624	34048640	34048781	2187	0,0,0	45,38,88	2,2,1	76,59,94	256	149	1	1	0.0,0.0,0.0	0.015,0.019,0.006	-0.013		3391	ENSMUSG00000032228.17	Tcf12	chr9	-	71775353	71777429	71775353	71775560	71777355	71777429	3391	70,88,62	18,15,18	80,69,68	13,18,25	1944	149	0.701702	1	0.23,0.31,0.209	0.32,0.227,0.173	0.01		1558	ENSMUSG00000039354.17
2189	ENSMUSG00000077450.14	Rab11b	chr17	-	33967483	33967559	33966387	33966787	33967840	33968034	2189	20,26,17	0,0,0	11,25,27	0,0,2	225	149	1	1	1.0,1.0,1.0	1.0,1.0,0.899	0.034		3392	ENSMUSG00000002769.10	Gnmt	chr17	-	47036986	47037337	47036986	47037108	47037194	47037337	3392	3,0,0	0,0,0	0,1,0	2,0,0	235	149	1	1	1.0,NA,NA	0.0,1.0,NA	0.5		1560	ENSMUSG00000030243.17
2190	ENSMUSG00000077450.14	Rab11b	chr17	-	33967483	33967564	33961457	33966787	33967840	33968034	2190	124168133	0,0,0	88184200	0,0,2	230	149	1	1	1.0,1.0,1.0	1.0,1.0,0.985	0.005		3398	ENSMUSG00000032128.16	Robo3	chr9	-	37327992	37329097	37327992	37328798	37328986	37329097	3398	3,0,0	0,1,0	0,1,0	0,0,1	337	149	1	1	1.0,0.0,NA	NA,1.0,0.0	0		1561	ENSMUSG00000020776.19
2192	ENSMUSG00000079557.12	Marchf2	chr17	-	33921986	33922182	33913190	33915220	33928718	33928946	2192	18,11,24	0,0,0	22,9,10	1,2,0	345	149	0.704923	1	1.0,1.0,1.0	0.905,0.66,1.0	0.145		3399	ENSMUSG00000032128.16	Robo3	chr9	-	37333114	37333636	37333114	37333236	37333410	37333636	3399	6,0,0	0,0,0	0,0,0	0,0,1	323	149	1	1	1.0,NA,NA	NA,NA,0.0	1		1563	ENSMUSG00000028107.15
2193	ENSMUSG00000079557.12	Marchf2	chr17	-	33934916	33935036	33928718	33928946	33937519	33937565	2193	2,1,1	2,3,5	2,0,0	1,0,5	269	149	1	1	0.356,0.156,0.1	0.526,NA,0.0	-0.059		3405	ENSMUSG00000030032.15	Wdr54	chr6	-	83133156	83133379	83133156	83133227	83133296	83133379	3405	0,1,0	0,0,0	0,0,0	2,1,0	218	149	1	1	NA,1.0,NA	0.0,0.0,NA	1		1564	ENSMUSG00000028107.15
2195	ENSMUSG00000059208.16	Hnrnpm	chr17	-	33871246	33871300	33868568	33869371	33877361	33877439	2195	262216279	2,3,4	234268337	1,4,6	203	149	0.766267	1	0.99,0.981,0.981	0.994,0.98,0.976	0.001		3409	ENSMUSG00000074272.11	Ceacam1	chr7	-	25164273	25165862	25164273	25164305	25165741	25165862	3409	1,2,0	0,0,2	1,1,0	1,0,1	1585	149	0.642643	1	1.0,1.0,0.0	0.086,1.0,0.0	0.305		1565	ENSMUSG00000028107.15
2196	ENSMUSG00000059208.16	Hnrnpm	chr17	-	33877843	33877888	33877361	33877439	33879186	33879224	2196	295229318	0,0,2	281283378	1,0,2	194	149	1	1	1.0,1.0,0.992	0.995,1.0,0.993	0.001		3414	ENSMUSG00000078784.9	Rbis	chr3	-	14671348	14672353	14671348	14671468	14672236	14672353	3414	46,35,37	69,56,108	64,51,41	90106136	917	149	0.684566	1	0.098,0.092,0.053	0.104,0.073,0.047	0.006		1566	ENSMUSG00000009995.18
2197	ENSMUSG00000059208.16	Hnrnpm	chr17	-	33877873	33877888	33877361	33877439	33879186	33879288	2197	9,6,11	0,0,2	9,20,22	1,0,2	164	149	0.991197	1	1.0,1.0,0.833	0.891,1.0,0.909	0.011		3415	ENSMUSG00000032409.16	Atr	chr9	+	95747020	95749738	95747020	95747898	95749546	95749738	3415	24,22,25	0,0,0	82,31,28	1,2,0	1797	149	0.597362	1	1.0,1.0,1.0	0.872,0.562,1.0	0.189		1572	ENSMUSG00000002968.10
2198	ENSMUSG00000059208.16	Hnrnpm	chr17	-	33885467	33885503	33884465	33884619	33885620	33885659	2198	41,31,68	0,0,2	43,50,66	2,1,0	185	149	1	1	1.0,1.0,0.965	0.945,0.976,1.0	0.015		3426	ENSMUSG00000032567.17	Aste1	chr9	+	105273743	105275057	105273743	105273904	105273996	105275057	3426	8,7,14	1,0,0	5,9,5	0,1,1	241	149	1	1	0.832,1.0,1.0	1.0,0.848,0.756	0.076		1576	ENSMUSG00000036555.15
2199	ENSMUSG00000059208.16	Hnrnpm	chr17	-	33885620	33885659	33885467	33885503	33887958	33888052	2199	21,21,28	0,0,1	16,32,40	0,0,1	188	149	1	1	1.0,1.0,0.957	1.0,1.0,0.969	-0.004		3431	ENSMUSG00000023277.14	Twf2	chr9	+	106089930	106090262	106089930	106090035	106090136	106090262	3431	2,0,0	16,9,13	1,1,2	14,17,14	250	149	1	1	0.069,0.0,0.0	0.041,0.034,0.078	-0.028		1578	ENSMUSG00000033862.8
2200	ENSMUSG00000059208.16	Hnrnpm	chr17	-	33889054	33889107	33888142	33888150	33896247	33896414	2200	202171298	0,3,1	158240238	0,0,1	202	149	1	1	1.0,0.977,0.995	1.0,1.0,0.994	-0.007		3432	ENSMUSG00000023277.14	Twf2	chr9	+	106091299	106091676	106091299	106091450	106091554	106091676	3432	0,1,1	18,21,13	0,1,0	17,20,22	253	149	1	1	0.0,0.027,0.043	0.0,0.029,0.0	0.014		1581	ENSMUSG00000000384.16
2202	ENSMUSG00000073423.11	Zfp414	chr17	+	33848595	33848672	33848063	33848190	33848770	33849053	2202	4,1,7	9,7,11	5,8,3	4,9,8	226	149	0.253182	1	0.227,0.086,0.296	0.452,0.369,0.198	-0.137		3441	ENSMUSG00000032577.17	Mapkapk3	chr9	-	107139621	107140963	107139621	107139686	107140823	107140963	3441	0,2,0	1,0,1	5,1,1	4,1,2	1286	149	0.659593	1	0.0,1.0,0.0	0.127,0.104,0.055	0.238		1584	ENSMUSG00000021193.11
2206	ENSMUSG00000003929.12	Zfp81	chr17	-	33557074	33557225	33555695	33555822	33577707	33577842	2206	1,1,3	1,4,3	4,3,2	4,2,8	300	149	0.592126	1	0.332,0.11,0.332	0.332,0.427,0.11	-0.032		3447	ENSMUSG00000005682.10	Pan2	chr10	+	128149009	128149612	128149009	128149129	128149483	128149612	3447	8,20,9	18,7,31	18,6,19	27,15,16	503	149	0.907318	1	0.116,0.458,0.079	0.165,0.106,0.26	0.041		1590	ENSMUSG00000029086.16
2208	ENSMUSG00000062070.13	Pgk1	chrX	+	105241447	105241567	105240448	105240552	105243252	105243367	2208	478427665	2,0,2	150612941581	0,1,1	269	149	1	1	0.993,1.0,0.995	1.0,0.999,0.999	-0.003		3453	ENSMUSG00000032596.15	Uba7	chr9	+	107854527	107855221	107854527	107854674	107855050	107855221	3453	2,0,1	1,0,0	1,0,0	0,0,0	525	149	1	1	0.362,NA,1.0	1.0,NA,NA	-0.319		1593	ENSMUSG00000039205.17
2218	ENSMUSG00000095325.4	Zfp870	chr17	-	33109267	33109385	33104930	33105057	33110414	33110564	2218	0,1,0	1,1,0	0,0,0	1,0,2	267	149	1	1	0.0,0.358,NA	0.0,NA,0.0	0.179		3455	ENSMUSG00000032596.15	Uba7	chr9	+	107858402	107858780	107858402	107858495	107858588	107858780	3455	3,4,2	2,0,0	1,0,2	0,0,1	242	149	1	1	0.48,1.0,1.0	1.0,NA,0.552	0.051		1594	ENSMUSG00000039205.17
2219	ENSMUSG00000055202.12	Zfp811	chr17	-	33019341	33019421	33017382	33017847	33019785	33019912	2219	0,0,3	0,0,0	2,3,1	0,1,0	229	149	1	1	NA,NA,1.0	1.0,0.661,1.0	0.113		3457	ENSMUSG00000079323.10	Gm20661	chr9	+	107870332	107870661	107870332	107870495	107870575	107870661	3457	0,1,0	0,1,0	1,0,0	1,1,0	229	149	1	1	NA,0.394,NA	0.394,0.0,NA	0.197		1595	ENSMUSG00000068284.15
2220	ENSMUSG00000055202.12	Zfp811	chr17	-	33019360	33019421	33014649	33017847	33019785	33019912	2220	8,5,11	0,0,0	14,16,11	0,1,0	210	149	1	1	1.0,1.0,1.0	1.0,0.919,1.0	0.027		3458	ENSMUSG00000015488.15	Cacfd1	chr2	+	26908899	26911101	26908899	26908991	26910032	26911101	3458	87,74,87	0,0,1	73,87,110	0,0,1	1190	149	1	1	1.0,1.0,0.916	1.0,1.0,0.932	-0.005		1597	ENSMUSG00000042772.16
2227	ENSMUSG00000024045.7	Akap8	chr17	-	32536819	32536852	32535191	32535641	32537744	32537778	2227	0,2,4	0,2,6	0,6,2	0,2,1	182	149	1	1	NA,0.45,0.353	NA,0.711,0.621	-0.264		3460	ENSMUSG00000070284.11	Gmppb	chr9	+	107928047	107928441	107928047	107928175	107928258	107928441	3460	1,1,1	10,3,5	0,6,4	0,5,7	232	149	1	1	0.06,0.176,0.114	NA,0.435,0.268	-0.235		1599	ENSMUSG00000037470.15
2228	ENSMUSG00000024045.7	Akap8	chr17	-	32536837	32536852	32535374	32535641	32537744	32537783	2228	0,0,3	0,2,6	1,0,2	0,2,1	164	149	1	1	NA,0.0,0.312	1.0,0.0,0.645	-0.392		3464	ENSMUSG00000032590.15	Apeh	chr9	-	107965459	107966768	107965459	107965548	107966716	107966768	3464	13,11,12	25,25,31	18,10,18	19,43,37	1317	149	0.809531	1	0.056,0.047,0.042	0.097,0.026,0.052	-0.01		1604	ENSMUSG00000032637.16
2229	ENSMUSG00000024002.19	Brd4	chr17	-	32417004	32417248	32415247	32416794	32417330	32417536	2229	173181167	0,0,0	171191229	0,1,0	393	149	1	1	1.0,1.0,1.0	1.0,0.986,1.0	0.005		3465	ENSMUSG00000032590.15	Apeh	chr9	-	107968441	107969088	107968441	107968502	107968966	107969088	3465	7,4,4	11,4,20	4,10,5	13,14,9	613	149	0.608306	1	0.134,0.196,0.046	0.07,0.148,0.119	0.013		1606	ENSMUSG00000038374.11
2230	ENSMUSG00000024002.19	Brd4	chr17	-	32443057	32443196	32440846	32441139	32444549	32444687	2230	135109156	0,1,3	137158194	0,0,0	288	149	0.785761	1	1.0,0.983,0.964	1.0,1.0,1.0	-0.018		3469	ENSMUSG00000032609.13	Klhdc8b	chr9	-	108326024	108326490	108326024	108326126	108326265	108326490	3469	0,0,0	1,2,2	0,1,0	0,2,2	288	149	1	1	0.0,0.0,0.0	NA,0.206,0.0	-0.103		1611	ENSMUSG00000038241.17
[truncated: 16,265 more rows]
[truncated: 68 more columns]
